# Supplementary material for: Network Structure Analysis Identifying Key Genes of Autism and Its Mechanism
Source: Comput Math Methods Med. 2020 Mar 23;2020:3753080. doi: 10.1155/2020/3753080 (PMC7125446; doi:10.1155/2020/3753080)
Supplement: Supplementary Materials — Data1: sheet1 is about 244 genes related to ASD; sheet2 is about the expression profile of 244 genes related to ASD in the control group (C); sheet3 is about the expression profile of 244 genes related to ASD in the experimental group (E). Data2: sheet1 and sheet2 are the Spearman correlation coefficients of C and E, respectively. Data3: the Spearman correlation networks of C at different threshold (0.1–1) (sheet1–sheet10). Data4: the Spearman correlation networks of E at different threshold (0.1–1) (sheet1–sheet10). Data5: comparison of node degree of C and E 's correlation networks under different thresholds (sheet1–sheet4). Data6: analysis of structural key genes (sheet1–sheet5). [file 3753080.f1.zip]

Archive with 8 entries (7 files):
- 3753080.f1/mat.3753080.v1-1.docx
- 3753080.f1/ProcessedData/
- 3753080.f1/ProcessedData/Data1-244Genes Related to ASD and Expression.xls
- 3753080.f1/ProcessedData/Data2-Spearman correlation coefficient of C and E.xlsx
- 3753080.f1/ProcessedData/Data3-C spearman correlation network at some threshold.xlsx
- 3753080.f1/ProcessedData/Data4-E spearman correlation network at some threshold.xlsx
- 3753080.f1/ProcessedData/Data5-Comparison of Node Degree of C and E under Different Thresholds.xls
- 3753080.f1/ProcessedData/Data6-Analysis of Structural Key Genes.xlsx
