# Supplementary material for: Network Structure Analysis Identifying Key Genes of Autism and Its Mechanism
Source: Comput Math Methods Med. 2020 Mar 23;2020:3753080. doi: 10.1155/2020/3753080 (PMC7125446; doi:10.1155/2020/3753080)
Supplement: Supplementary Materials — Data1: sheet1 is about 244 genes related to ASD; sheet2 is about the expression profile of 244 genes related to ASD in the control group (C); sheet3 is about the expression profile of 244 genes related to ASD in the experimental group (E). Data2: sheet1 and sheet2 are the Spearman correlation coefficients of C and E, respectively. Data3: the Spearman correlation networks of C at different threshold (0.1–1) (sheet1–sheet10). Data4: the Spearman correlation networks of E at different threshold (0.1–1) (sheet1–sheet10). Data5: comparison of node degree of C and E 's correlation networks under different thresholds (sheet1–sheet4). Data6: analysis of structural key genes (sheet1–sheet5). [file 3753080.f1.zip › 3753080.f1/ProcessedData/Data1-244Genes Related to ASD and Expression.xls]

## Sheet: genes related to ASD
No	Genes-related to ASD
G1	ACPT
G2	AF289551
G3	AK123826 /// RP11-510M2.2
G4	AL928742.12
G5	AMER3
G6	ANKMY1
G7	APOC2 /// APOC4 /// APOC4-APOC2
G8	ARHGAP22-IT1
G9	ARHGAP42
G10	ARHGDIG
G11	ARHGEF25
G12	ARL16
G13	ATRIP /// TREX1
G14	B3GNT7
G15	BATF2
G16	BSG
G17	BZRAP1
G18	C17orf51
G19	C17orf85
G20	C1GALT1C1
G21	C1orf95
G22	C3orf62 /// MIR4271
G23	C6orf223
G24	C7orf63
G25	C9orf3
G26	CACNG8
G27	CALCA
G28	CALHM3
G29	CCDC85A
G30	CCHCR1
G31	CCL3 /// CCL3L1 /// CCL3L3
G32	CCL4
G33	CD160
G34	CD244
G35	CFC1B
G36	CHDH
G37	CHRND
G38	CMPK2
G39	CNPY4
G40	CNTN2
G41	COX2
G42	CSF3
G43	CTAG1A /// CTAG1B
G44	CTAG2
G45	CXCL8
G46	DDX58
G47	DHRS3
G48	DIRAS1
G49	DOCK9-AS2
G50	DRP2
G51	DUSP15
G52	EEF1A1P42
G53	EGR2
G54	EIF3K
G55	ENGASE
G56	EPSTI1
G57	ERGIC1
G58	ESPNL
G59	ETV7
G60	EVPLL
G61	EXTL1
G62	FAM134C
G63	FAM154B
G64	FAM160B2
G65	FAM177A1 /// LOC101927178
G66	FBF1
G67	FIGF /// PIR-FIGF
G68	FKBP8
G69	FOSB
G70	FOXO6
G71	FOXP3
G72	FSD1
G73	FST
G74	GAS8
G75	GAST
G76	GATA2
G77	GBP1
G78	GCNT1P1 /// GCNT1P1
G79	GFOD1
G80	GJC2
G81	GOLGA8I /// GOLGA8M
G82	GPD1
G83	H1FOO
G84	HBG1 /// HBG2
G85	HERC5
G86	HES6
G87	HIST1H2BG /// HIST1H2BJ
G88	HNRNPCL1 /// HNRNPCL2 /// LOC101060301 /// LOC649330
G89	HOXB4
G90	HOXD9
G91	HRCT1
G92	HTRA3
G93	HYAL4
G94	HYI
G95	IFI6
G96	IFIT1
G97	IFIT2
G98	IFIT5
G99	IFITM3
G100	IQCD
G101	JUP /// KRT17
G102	KIAA0319
G103	KIAA1751
G104	KIF1B
G105	KIF25
G106	LAP3
G107	LDB2
G108	LGALS3BP
G109	LIMD1-AS1
G110	LINC00028
G111	LINC00189
G112	LINC00951
G113	LINC00967
G114	LINC01016
G115	LLGL2
G116	LMX1B
G117	LOC100130872 /// SPON2
G118	LOC100505711
G119	LOC100507501
G120	LOC100507535
G121	LOC100996425
G122	LOC100996758 /// NPY4R
G123	LOC101927098
G124	LOC101927814
G125	LOC101927830 /// TMLHE-AS1
G126	LOC101928160 /// ZNF707
G127	LOC101928955
G128	LOC101929372
G129	LOC101929464
G130	LOC101930415
G131	LOC101930421
G132	LOC102723918
G133	LOC102724399 /// RIMBP2
G134	LOC221122
G135	LOC283075
G136	LOC284788
G137	LOC648987
G138	LOC79999
G139	LOC90246
G140	LXN
G141	LYZL1 /// LYZL2
G142	LZTS2
G143	MAFF
G144	MAGI1
G145	MAMDC4
G146	MAP4K4
G147	MAPK11
G148	MATN1
G149	MED13
G150	MESP1
G151	MIR7111 /// RPL10A
G152	MMP8
G153	MOGAT1
G154	MRGPRG-AS1
G155	MX1
G156	MYCN
G157	NCR2
G158	NDRG4
G159	NHS
G160	NINJ2
G161	NKX6-1
G162	NOV
G163	NPR1
G164	NR1H2
G165	NRG2
G166	NRIP1
G167	NSD1
G168	OAS3
G169	OASL
G170	OGFRP1
G171	OR5L2
G172	OTOP2
G173	PAFAH1B1
G174	PAK6
G175	PAPPA
G176	PCDHAC1
G177	PCDP1
G178	PHOSPHO1
G179	PHYHIP
G180	PML
G181	PNMAL2
G182	POLR2E
G183	POMT2
G184	POU3F2
G185	PPP1R37
G186	PRSS3P2
G187	PSENEN
G188	PTGER1
G189	PTGS2
G190	PTPN3
G191	QPCTL
G192	RAB8A
G193	RHPN1
G194	RMI1
G195	RP11-108P20.1
G196	RP11-1114A5.4
G197	RP11-231C18.1
G198	RP11-373D23.2
G199	RP11-389C8.2
G200	RP11-432J9.6
G201	RP11-440L14.3
G202	RPS4XP3 /// RPS4XP3
G203	RSAD2
G204	RTEL1-TNFRSF6B /// TNFRSF6B
G205	RTP4
G206	SEMA4C
G207	SEMA6B
G208	SERP2
G209	SERPINA5
G210	SERPING1
G211	SH2D1B
G212	SHISA5
G213	SHISA7
G214	SIGLEC1
G215	SLC34A1
G216	SLC4A9
G217	SLC8A1-AS1
G218	SNHG17
G219	SNORD3A /// SNORD3B-1 /// SNORD3B-2 /// SNORD3C /// SNORD3D
G220	SPATA2
G221	SPATS2L
G222	SPI1
G223	TBC1D27
G224	THEG5
G225	TMCC1
G226	TMPRSS6
G227	TNK1
G228	TREML4
G229	TRIM6
G230	TRPV6
G231	TTBK1
G232	TYSND1
G233	UCN2
G234	USF1
G235	USP8
G236	VPS37D
G237	WFDC9
G238	ZBP1
G239	ZBTB20-AS1
G240	ZCCHC5
G241	ZFHX3
G242	ZMPSTE24
G243	ZNF516
G244	ZNF788 /// ZNF788

## Sheet: C Expression Profile
G1	0.00110281	0.00175764	0.00183976	0.00190217	0.00233249	0.00164235	0.00136893	0.0019087	0.0012592	0.00145681	0.00141551	0.0013062	0.00150561	0.00183186	0.00181449	0.001571	0.00150304	0.00162714	0.00148885	0.0012997	0.00157715	0.00236482	0.00151425	0.00166159	0.0019128	0.00163015	0.00197404	0.00141074	0.0014962	0.00130616	0.00133723	0.00210629	0.00149336	0.00176121	0.00155968	0.00138939	0.00148917	0.00217684	0.00175935	0.0019484	0.0019868	0.00227448	0.00185167	0.00152535	0.00189572	0.00156005	0.00196621	0.00137887	0.00173003
G2	0.00147078	0.00161926	0.00198265	0.00168325	0.00240336	0.00161327	0.00171356	0.00224675	0.00175142	0.0022355	0.00171189	0.00178437	0.00127832	0.00170116	0.00202335	0.00168512	0.00146156	0.00136802	0.00152564	0.00190844	0.00151778	0.00204639	0.00164031	0.00144466	0.0019225	0.00173836	0.00155068	0.00172061	0.00202189	0.00128833	0.0022934	0.00154547	0.00209842	0.00139386	0.00176593	0.00168915	0.00190719	0.00165811	0.00219508	0.00159235	0.00218884	0.00251923	0.00250569	0.00175592	0.00192034	0.00126114	0.00137736	0.00188404	0.00178647
G3	0.00209183	0.00165195	0.00193479	0.00236866	0.00251334	0.00162115	0.00169944	0.00183549	0.00187278	0.00174283	0.00172158	0.00173637	0.00172296	0.00213446	0.00210777	0.00182175	0.00175392	0.00177847	0.0018903	0.00121739	0.00182409	0.00221928	0.00190214	0.00177614	0.00209834	0.00172825	0.00206956	0.00184113	0.00186825	0.00157316	0.00148082	0.00226599	0.00178741	0.00195376	0.00179559	0.00181044	0.00153499	0.00193185	0.00188341	0.00168655	0.00253923	0.00213709	0.00172882	0.00157321	0.0017204	0.00209318	0.00166394	0.00147616	0.00236933
G4	0.00194487	0.00176554	0.00286405	0.00276589	0.00292325	0.00172712	0.00172511	0.00279415	0.00190413	0.00207501	0.00203485	0.00209401	0.00144659	0.0020175	0.00278834	0.00297112	0.00263239	0.00173631	0.00161261	0.00195776	0.00269023	0.00275579	0.00206	0.00286931	0.00246281	0.0024038	0.00165103	0.00193183	0.00220019	0.00207635	0.00215548	0.0023114	0.0028894	0.00299872	0.00168272	0.0021753	0.00220573	0.00272135	0.00277264	0.00302417	0.00220217	0.00285	0.00211173	0.00263953	0.00280086	0.00175777	0.00277049	0.00225467	0.00209154
G5	0.000876761	0.00091566	0.00103459	0.00103458	0.000986554	0.000800722	0.000787878	0.000738033	0.000880259	0.000850114	0.000819316	0.000879297	0.000741514	0.000839073	0.000887647	0.000903821	0.000877975	0.000736222	0.000818614	0.000743904	0.000902233	0.000934308	0.00108835	0.00101908	0.00103042	0.000746161	0.000698565	0.000899756	0.000776023	0.000637716	0.000709197	0.00112782	0.000890811	0.00118402	0.000781563	0.000812441	0.000754514	0.00101017	0.00108583	0.00103293	0.00107277	0.000941215	0.000852358	0.00083808	0.000858494	0.0008276	0.000975428	0.000718744	0.000913025
G6	0.00215234	0.00215139	0.00226972	0.00200736	0.00203987	0.0019756	0.00214442	0.00263509	0.00190938	0.00220599	0.00202608	0.00197338	0.00210408	0.00242121	0.00227343	0.00230686	0.00240392	0.00231346	0.00199703	0.00198325	0.00211453	0.00205458	0.00234177	0.00219829	0.0019572	0.00211037	0.00195029	0.00226256	0.00224503	0.00199995	0.00251488	0.00221722	0.00219883	0.0020634	0.00184954	0.00211409	0.00221443	0.00223983	0.00217703	0.00200223	0.00244463	0.0019334	0.00247199	0.00243817	0.00221464	0.0022844	0.00204334	0.00224938	0.00231017
G7	0.00262227	0.00216352	0.00252349	0.00285928	0.00327291	0.00250556	0.00220133	0.00295868	0.00243303	0.00269323	0.00219814	0.00253195	0.00246409	0.00280008	0.00286901	0.00234057	0.00258387	0.00224077	0.00248098	0.00212989	0.00259392	0.00312208	0.00249454	0.0027212	0.00324688	0.00231433	0.00235266	0.00258544	0.00233838	0.00227768	0.00212954	0.00283165	0.00252863	0.00323314	0.00215487	0.00236086	0.00218261	0.00320575	0.00346923	0.00326389	0.00323031	0.00308418	0.00257892	0.00224463	0.00274481	0.00253354	0.00301929	0.00219284	0.00267494
G8	0.000482839	0.000576073	0.00049676	0.000603865	0.000519274	0.000511011	0.000419607	0.000510297	0.000443701	0.000538323	0.000487554	0.000487776	0.00051253	0.000498667	0.000546662	0.00051243	0.000476414	0.000470202	0.000535015	0.000432294	0.00055754	0.000526946	0.000486176	0.000508764	0.000553975	0.000451689	0.000517619	0.000460766	0.000426969	0.000573541	0.0005123	0.00062055	0.000540703	0.000488361	0.000450171	0.000540146	0.000472869	0.000612213	0.00046351	0.000547913	0.000522827	0.000596146	0.000436268	0.000538717	0.000551054	0.000496505	0.000554954	0.000456108	0.00048606
G9	0.000402248	0.000462112	0.000444001	0.00044033	0.000433697	0.000368605	0.000388819	0.000397532	0.000395687	0.000449432	0.000408643	0.000443597	0.000432407	0.000393503	0.000413139	0.000376454	0.000373581	0.000402155	0.00039009	0.000406012	0.0003805	0.000453396	0.000467382	0.000449419	0.000406671	0.000396062	0.000380559	0.000432387	0.000440245	0.000406372	0.000377315	0.000488469	0.000416589	0.000471962	0.000401914	0.000382414	0.000453267	0.000445758	0.00045527	0.000449081	0.000499565	0.000400671	0.000487018	0.000376401	0.000445396	0.000418258	0.000447014	0.000387492	0.000362157
G10	0.00125062	0.00119847	0.00138053	0.00161595	0.00151413	0.00116524	0.00165215	0.00147834	0.000871439	0.00140199	0.00131239	0.0014303	0.0012738	0.00148455	0.00161292	0.00116525	0.00110221	0.00119082	0.000886067	0.00126341	0.00138031	0.0012862	0.00136122	0.00182293	0.00144893	0.00114291	0.00110859	0.00132167	0.00135827	0.00126059	0.00135038	0.00171261	0.00138945	0.00172771	0.001001	0.00140617	0.00116447	0.00198091	0.00226441	0.00137065	0.00195641	0.00160232	0.00181971	0.00129684	0.00164	0.00129381	0.00141697	0.00125356	0.00161962
G11	0.00147689	0.00164829	0.00169503	0.00233265	0.00203573	0.00167884	0.0013369	0.00167519	0.00152916	0.00193895	0.00164787	0.00146237	0.00201621	0.00168621	0.00158687	0.00181812	0.00177673	0.00158688	0.00154997	0.00164792	0.00197443	0.00174867	0.00223409	0.00175815	0.00168972	0.00152767	0.00161766	0.00167771	0.00152808	0.0015587	0.00137822	0.00192155	0.001524	0.00187781	0.00157009	0.00150355	0.00173679	0.00184132	0.00199046	0.00173271	0.00176235	0.00201293	0.00191075	0.00197981	0.00198445	0.00148955	0.00181325	0.0014743	0.00173617
G12	0.00593048	0.00411834	0.00662173	0.00591801	0.00457037	0.00548905	0.00671438	0.00660337	0.00424831	0.00738984	0.00734661	0.00690565	0.00705872	0.00595678	0.00565944	0.0063861	0.00616858	0.00612963	0.00670718	0.00648374	0.00649633	0.00471943	0.00479254	0.00686515	0.00394016	0.00732253	0.00456599	0.00690296	0.00612895	0.00636812	0.0055013	0.00550293	0.00711298	0.00610324	0.00635723	0.00756097	0.00726905	0.00630344	0.00397854	0.00522676	0.00601975	0.00661024	0.00817349	0.00777543	0.00556437	0.0063434	0.00719114	0.00707542	0.00732303
G13	0.0175559	0.0193295	0.0165592	0.0222056	0.0516977	0.0227061	0.0484017	0.0270469	0.0215886	0.0370039	0.0199636	0.0249516	0.0313121	0.0268977	0.0247184	0.0236585	0.0220078	0.0266057	0.0209556	0.0193579	0.0260758	0.0198322	0.0278057	0.0215809	0.0381751	0.0203531	0.0520376	0.0246834	0.0258124	0.0239569	0.0274314	0.0228572	0.0223391	0.0230884	0.0179809	0.019471	0.0209821	0.0218997	0.0281887	0.0400138	0.0328334	0.0173511	0.0216218	0.0274467	0.0212418	0.0245271	0.0233453	0.0193684	0.0245733
G14	0.00131024	0.00142951	0.00141027	0.00121252	0.00146855	0.00121416	0.00122402	0.00145643	0.0013365	0.00120688	0.00116454	0.00133209	0.00121243	0.00154348	0.00120877	0.00148585	0.00127144	0.00127033	0.00117483	0.00109163	0.0012349	0.00156172	0.00120327	0.00152037	0.0014361	0.00133683	0.00123394	0.00125154	0.00137783	0.000995326	0.00123961	0.00137595	0.00126368	0.0014109	0.001158	0.00104157	0.00108245	0.00159252	0.00119822	0.00141545	0.00133889	0.0011796	0.00190943	0.00148951	0.00133789	0.0011127	0.00128724	0.00121751	0.00129738
G15	0.00301809	0.00312048	0.00370748	0.00865432	0.0220351	0.00312676	0.0316018	0.00745931	0.00445014	0.0133058	0.00489458	0.00665313	0.0145164	0.00363311	0.00249398	0.00248581	0.0039115	0.00442907	0.00368909	0.00453354	0.00363879	0.00444793	0.00576445	0.0043539	0.00976115	0.00391747	0.0139058	0.00403335	0.00473762	0.00419029	0.00537392	0.00295157	0.00623403	0.0038431	0.00322151	0.0032986	0.00292732	0.00410328	0.00355635	0.0337375	0.00659467	0.00317622	0.00462739	0.0037708	0.00389437	0.00681047	0.00506116	0.00399749	0.00490457
G16	0.0239854	0.0243176	0.0208764	0.0268442	0.00713522	0.0297044	0.0187513	0.0315399	0.0230979	0.0277464	0.0294304	0.0291502	0.0217683	0.034763	0.0421244	0.020763	0.0246713	0.0290855	0.0245893	0.0200042	0.0216156	0.0186523	0.0280877	0.0239591	0.0241603	0.0291905	0.0193496	0.0298803	0.0217896	0.0283787	0.0153107	0.0207985	0.024404	0.0273448	0.0267415	0.0188153	0.0210617	0.0271425	0.0356408	0.0233617	0.028154	0.0120191	0.0373065	0.0256774	0.0222952	0.0217355	0.0313061	0.0302283	0.033105
G17	0.00373455	0.00338334	0.00346616	0.00274583	0.00330256	0.00365461	0.00317125	0.00544672	0.00325017	0.00396997	0.00227133	0.0041347	0.00285471	0.00342165	0.00505116	0.00326305	0.00308927	0.0036662	0.00441052	0.00399229	0.00377985	0.003832	0.00272356	0.00390564	0.00340371	0.00432396	0.00329494	0.00403791	0.00407813	0.00333104	0.0040888	0.00288476	0.00301395	0.00298175	0.00395393	0.00337357	0.00287886	0.00369132	0.00451011	0.00250228	0.00468237	0.00428466	0.00633469	0.00332063	0.00315721	0.00350348	0.0029756	0.00428485	0.00396924
G18	0.00157438	0.0016353	0.00186953	0.00178812	0.00210998	0.00151665	0.00159966	0.00186783	0.00147017	0.00153897	0.00155043	0.00121088	0.00159015	0.00156173	0.00193104	0.00189253	0.00211198	0.00157651	0.00144147	0.00138635	0.00172633	0.00213746	0.00144721	0.0022419	0.00158052	0.00169957	0.00146465	0.00137809	0.0017506	0.00123279	0.00157814	0.00206861	0.00193084	0.00198704	0.00158462	0.00149967	0.00161441	0.00225828	0.00188273	0.00202649	0.00146101	0.00223402	0.00169206	0.00165318	0.00180008	0.00130084	0.00187756	0.00150668	0.00188956
G19	0.00588232	0.00618006	0.00661001	0.00527694	0.00455636	0.00598687	0.0062627	0.00523841	0.00664164	0.00548205	0.00583129	0.00593903	0.00612901	0.00640878	0.00517929	0.00565132	0.00557264	0.00651748	0.00612897	0.00627271	0.00533036	0.00507311	0.00492397	0.00500018	0.00555372	0.00660455	0.00681231	0.00626689	0.00573186	0.00607746	0.00682083	0.00505596	0.00600307	0.00493355	0.00645913	0.0061805	0.00615471	0.00451318	0.00597356	0.00495813	0.00600473	0.00594222	0.00632502	0.0060194	0.00487912	0.00684842	0.00597895	0.00636585	0.00541685
G20	0.00594603	0.0059817	0.00528937	0.00673	0.00518123	0.00551056	0.0093311	0.00554099	0.0071804	0.00724066	0.00693383	0.00697651	0.00705784	0.00562933	0.00457347	0.00594842	0.00764425	0.00665633	0.0059318	0.00654699	0.00666179	0.00454441	0.00697177	0.00600214	0.00566473	0.00679374	0.00728495	0.00622425	0.00745805	0.00694769	0.00670725	0.00383745	0.00730967	0.00546545	0.0071736	0.00770903	0.00698242	0.00580018	0.0047472	0.00747263	0.00577525	0.00475153	0.00625054	0.00673547	0.0071148	0.006622	0.00704853	0.00695993	0.00625591
G21	0.00152964	0.0013019	0.00135337	0.00199979	0.00168925	0.00124534	0.00116952	0.00165994	0.00124808	0.00172494	0.00136874	0.00140986	0.00145355	0.00151829	0.00153776	0.0015048	0.00166888	0.00112774	0.00141975	0.00139557	0.00181359	0.00192105	0.00142805	0.00205617	0.0015252	0.00123869	0.00114577	0.00119144	0.00144831	0.00129548	0.00154743	0.00163315	0.00142472	0.0014795	0.00104267	0.0013718	0.00147599	0.00206306	0.00221235	0.00159441	0.00140552	0.00169914	0.00155663	0.00140979	0.00171179	0.00128974	0.00154097	0.00147066	0.00171399
G22	0.0069855	0.00807974	0.00706849	0.00665138	0.00438897	0.00964589	0.00813972	0.00607046	0.0090025	0.00626754	0.00918321	0.00616273	0.00648464	0.00740741	0.00605052	0.00457444	0.00644692	0.00733805	0.00645631	0.00746705	0.00739499	0.00717544	0.0062839	0.00573006	0.0066437	0.00825892	0.00849162	0.00657526	0.00899318	0.00830043	0.00753843	0.00625817	0.00658277	0.00393263	0.0132172	0.00735038	0.00821581	0.00554462	0.00800149	0.0078144	0.00720151	0.0070597	0.00845426	0.00617953	0.00623065	0.00923679	0.00870863	0.00821688	0.00642997
G23	0.00347271	0.00386079	0.00334231	0.00365219	0.00453287	0.00371366	0.00303479	0.00343005	0.00324554	0.00292054	0.00303837	0.00322169	0.00362522	0.00361788	0.0037203	0.00390946	0.0039695	0.00338125	0.00347332	0.00322166	0.00398506	0.00426333	0.00416856	0.00394346	0.00380459	0.0034579	0.0031247	0.00319076	0.00308969	0.00345527	0.00317625	0.00485367	0.00351044	0.00321754	0.0026658	0.00351756	0.00302795	0.00460528	0.00429221	0.00330179	0.00331532	0.00460014	0.00351135	0.00300677	0.0035705	0.00326106	0.00317175	0.00331376	0.0037013
G24	0.000785623	0.000749885	0.000721312	0.000832497	0.000883394	0.000786279	0.000664141	0.000829581	0.00069343	0.000735	0.000765412	0.000922081	0.00070412	0.000962452	0.000729569	0.000755913	0.000723676	0.000719672	0.000697621	0.000650127	0.000710882	0.00088856	0.000735084	0.000828778	0.00092165	0.000705239	0.000703515	0.00075921	0.000715311	0.000596996	0.000699445	0.000858687	0.00079678	0.000811469	0.00071924	0.000713025	0.000705807	0.000976522	0.000950478	0.000728668	0.000876361	0.000924035	0.000729041	0.00070207	0.00080112	0.000767711	0.000834545	0.000710746	0.000884356
G25	0.00136384	0.00169835	0.00162779	0.00139482	0.00173894	0.0013382	0.00151384	0.00189852	0.00164467	0.00148482	0.00128252	0.0016202	0.00139307	0.00163062	0.00161823	0.00160047	0.00159048	0.00144526	0.00134656	0.00157592	0.00148549	0.00173297	0.00137999	0.00184788	0.00185612	0.00155304	0.00173917	0.00187863	0.00162436	0.00116649	0.00150848	0.00185102	0.00131225	0.00120373	0.001175	0.0012907	0.00154632	0.00170536	0.00128233	0.00156292	0.00130904	0.00180694	0.00149568	0.00180538	0.00169776	0.00146207	0.00122123	0.00165712	0.00142746
G26	0.00145955	0.00166749	0.00163672	0.0024025	0.00227846	0.00169559	0.00156521	0.00178362	0.00126567	0.00165297	0.00139053	0.00153489	0.00162728	0.00155938	0.00178091	0.00158812	0.00202964	0.00161748	0.001682	0.00164372	0.00196759	0.00200158	0.0019752	0.00172845	0.00139078	0.00163902	0.00177073	0.00187551	0.00160578	0.00129201	0.00161477	0.00236876	0.00163719	0.00201572	0.00152149	0.0016974	0.00142161	0.00210349	0.00221124	0.00173009	0.00209808	0.00169761	0.0017957	0.00129884	0.00207432	0.0016905	0.00170165	0.00143936	0.00155287
G27	0.00096402	0.00107032	0.00106929	0.00116852	0.00127409	0.00093933	0.000847657	0.00103138	0.000843719	0.00104643	0.000941513	0.00100722	0.00104412	0.00101376	0.000991828	0.000994142	0.000913803	0.00107249	0.000920212	0.00079347	0.0011419	0.00104464	0.000942532	0.00112893	0.00102137	0.000917393	0.00092106	0.000965336	0.000988954	0.000927608	0.00090754	0.00120299	0.00102023	0.00133929	0.000967087	0.000903275	0.000931544	0.00120882	0.00109277	0.00102576	0.00107023	0.000978879	0.000959978	0.000901578	0.00115833	0.000938773	0.00115826	0.000910348	0.00117371
G28	0.000493793	0.000581427	0.00075261	0.000705228	0.000770714	0.000578374	0.000488706	0.000591686	0.000567207	0.000435715	0.000592284	0.000583326	0.00054249	0.000539962	0.0007726	0.000770215	0.000666044	0.000705166	0.00068753	0.000583302	0.000835184	0.000699181	0.000671526	0.000634269	0.000593863	0.000631353	0.000581835	0.000532381	0.000554969	0.000570717	0.000612198	0.000728478	0.000774742	0.000697808	0.000482402	0.00063935	0.000631088	0.00073775	0.000629006	0.000629252	0.000684827	0.000678184	0.000708719	0.000666383	0.000772642	0.000533013	0.000603136	0.000640173	0.000652793
G29	0.000831105	0.00065986	0.000915206	0.000934744	0.000916898	0.000713435	0.000823593	0.000885551	0.000851593	0.00108333	0.000771407	0.000697197	0.000857026	0.000797072	0.000872616	0.000831326	0.000938672	0.000676926	0.000785127	0.000771925	0.000957047	0.00102456	0.000894075	0.000999924	0.000851054	0.000761322	0.000712949	0.000962626	0.000766057	0.000541607	0.000717261	0.00109414	0.000784177	0.000965965	0.000762384	0.000713865	0.000748277	0.000985969	0.000806371	0.000915924	0.000925707	0.000880737	0.00100376	0.000803297	0.000926027	0.000749317	0.00102246	0.000790458	0.000902336
G30	0.00342398	0.00314033	0.00328122	0.00303758	0.00360562	0.00310464	0.0028637	0.00332391	0.00311494	0.00300098	0.00284718	0.00360982	0.00362384	0.00318887	0.00382529	0.00327273	0.0027525	0.00323691	0.00296703	0.00321428	0.0032783	0.0033239	0.00272554	0.00310832	0.00328841	0.00282947	0.00314314	0.00324946	0.00327969	0.00302959	0.00306316	0.00407191	0.00317962	0.0031845	0.00274053	0.00287342	0.00311465	0.00335921	0.00296784	0.00319258	0.00335118	0.00387286	0.00334701	0.00322997	0.00317439	0.00313861	0.00297061	0.00285354	0.00312599
G31	0.00393044	0.0174928	0.00412947	0.0039155	0.00628055	0.00399147	0.00509213	0.00599825	0.00554202	0.00460472	0.00431286	0.00434602	0.00341536	0.00489369	0.026127	0.00444237	0.00408377	0.00513603	0.0038699	0.00505156	0.00388069	0.0205857	0.0038377	0.0064443	0.00275892	0.00401928	0.00566089	0.00277855	0.00435993	0.0214133	0.00521347	0.00371682	0.00498835	0.00381974	0.00480817	0.00618822	0.00678748	0.00855789	0.00317711	0.00490556	0.00378987	0.00319451	0.0189249	0.00583134	0.00386158	0.00327033	0.00572825	0.00461014	0.00397141
G32	0.0196658	0.0294652	0.0236738	0.0257052	0.0522119	0.0250109	0.030691	0.0445101	0.0281357	0.0254822	0.0158346	0.0209546	0.027629	0.0245898	0.0256523	0.027631	0.0239755	0.0316262	0.0221895	0.0407529	0.028745	0.0373361	0.0189382	0.0390217	0.0241978	0.0255171	0.0270151	0.0284085	0.0294302	0.0185924	0.026385	0.0173956	0.0193289	0.0201768	0.0255632	0.0224748	0.0278519	0.0427173	0.0232936	0.0275763	0.0352943	0.0446545	0.0528329	0.0559384	0.0236071	0.016781	0.0432965	0.0260902	0.0252645
G33	0.00542652	0.00851383	0.00853899	0.00807933	0.0148271	0.0120993	0.00770443	0.00892173	0.00748258	0.00589752	0.00520733	0.00586881	0.00801034	0.0101554	0.00645695	0.0112114	0.00958053	0.010503	0.00933408	0.0118273	0.00816186	0.0134709	0.00909797	0.0107759	0.00585517	0.00846328	0.0029722	0.00783737	0.00891426	0.00662267	0.00817569	0.00808388	0.00644376	0.00458406	0.00429986	0.00785083	0.0107258	0.0136865	0.00455636	0.00655279	0.00945053	0.00638163	0.0112465	0.0150568	0.0098268	0.00571378	0.00607686	0.00846002	0.00821489
G34	0.00930588	0.0092734	0.00876878	0.00980099	0.00670266	0.00848544	0.00695874	0.00853284	0.00988739	0.0139012	0.00857659	0.00696243	0.0104584	0.00706433	0.00610935	0.00725821	0.00923688	0.0112586	0.0103944	0.0103845	0.00759818	0.0103934	0.011074	0.00955797	0.0094515	0.00779426	0.0074661	0.0091374	0.00839775	0.00959826	0.00880934	0.0072697	0.00898948	0.00995578	0.00620812	0.00756901	0.00734898	0.00826297	0.0091627	0.00875624	0.00959453	0.00869412	0.00913471	0.00991829	0.00821854	0.00705157	0.00972588	0.00708408	0.0102923
G35	0.00163942	0.00130102	0.00173537	0.00187049	0.00193014	0.00161721	0.00130428	0.00244831	0.00161738	0.0016206	0.00161211	0.00124302	0.00166673	0.00154573	0.0019615	0.00197846	0.00178599	0.00144677	0.00117325	0.00172982	0.00195601	0.00186468	0.0019529	0.00220631	0.00169309	0.00162297	0.00149661	0.00125574	0.00190237	0.00153794	0.00166673	0.00239074	0.00223539	0.00173414	0.00131705	0.00152166	0.0017661	0.00225026	0.00125378	0.00210375	0.00155255	0.00168548	0.00146624	0.00135207	0.00232538	0.00129565	0.00155787	0.00160809	0.00209423
G36	0.00112392	0.00118605	0.0012339	0.00143208	0.00144998	0.00123204	0.00103971	0.00119682	0.00113817	0.00122705	0.00117123	0.00106443	0.00105969	0.00121525	0.00135196	0.00121276	0.00116135	0.00104696	0.00116573	0.0010376	0.00130273	0.00132236	0.00121517	0.00127902	0.00133448	0.00114859	0.00117667	0.0011885	0.00107665	0.00105906	0.00107497	0.00138018	0.00112702	0.0014247	0.00102795	0.00113529	0.00113598	0.00142542	0.00139094	0.00129414	0.00117685	0.00138168	0.00108677	0.00108952	0.00127858	0.00120155	0.00122297	0.00121415	0.00117084
G37	0.00092137	0.000853491	0.000833039	0.00102916	0.0011319	0.000554797	0.00100078	0.000911167	0.000720875	0.000960749	0.000835291	0.000852051	0.000808799	0.000752223	0.000899743	0.000755057	0.000723374	0.000775281	0.000837277	0.000909987	0.000790189	0.000872407	0.000891985	0.000957502	0.000896883	0.000748045	0.000821419	0.000844398	0.000760203	0.000715046	0.000791496	0.000961777	0.000985148	0.00101015	0.000671424	0.000934206	0.00090262	0.00103294	0.000997118	0.000956921	0.000938518	0.00086212	0.00083352	0.000875342	0.000967087	0.0010165	0.000890142	0.000834488	0.000920285
G38	0.0103914	0.0106634	0.0148751	0.013073	0.176717	0.0132476	0.101463	0.0120402	0.0208526	0.00998093	0.0124642	0.00925011	0.0283163	0.00974201	0.00950147	0.0144392	0.0219788	0.0200921	0.013813	0.0210862	0.027626	0.0194546	0.0263855	0.0146029	0.0321005	0.0112158	0.128273	0.0114181	0.0310184	0.0188136	0.056388	0.0100082	0.0173064	0.00580719	0.00724858	0.0182642	0.0205841	0.010499	0.00573289	0.11325	0.0191079	0.0093637	0.0119953	0.00909906	0.024016	0.0145567	0.0115446	0.0104961	0.0132542
G39	0.00644165	0.00531177	0.0052933	0.00453884	0.00587805	0.0052528	0.00590284	0.00615954	0.00572749	0.0070781	0.00565017	0.00654789	0.00662778	0.00557341	0.00653967	0.00581585	0.00560754	0.00566701	0.00512984	0.00603218	0.00535388	0.00466929	0.00519092	0.00581191	0.00511992	0.00519012	0.00530996	0.00616837	0.00574829	0.00589994	0.00561966	0.00670531	0.00598449	0.00516586	0.0052059	0.00514636	0.00577584	0.00639	0.0043032	0.00501557	0.00595529	0.00679741	0.00584897	0.00698203	0.00565031	0.00514808	0.00580609	0.0053665	0.0055758
G40	0.00144579	0.00166084	0.00161627	0.00195589	0.0020084	0.00165444	0.00152068	0.00152793	0.00142402	0.00189913	0.00145555	0.00169325	0.00186747	0.00191004	0.00172442	0.00154856	0.00164381	0.00153061	0.00166386	0.0017095	0.00182141	0.00145366	0.00151728	0.00190734	0.00193337	0.00177003	0.00193567	0.00164488	0.00146448	0.00135646	0.00133459	0.0016881	0.00156779	0.00150389	0.00137039	0.00160062	0.00143572	0.00182529	0.00181905	0.00146368	0.00162865	0.00189124	0.00141004	0.00137804	0.00185531	0.00154707	0.00162925	0.00156428	0.00169303
G41	0.571436	0.519579	0.58296	0.576424	0.573668	0.546099	0.546924	0.623713	0.567879	0.444719	0.579788	0.514425	0.536008	0.50709	0.539279	0.572508	0.588898	0.533715	0.520477	0.458101	0.566827	0.546362	0.560561	0.575125	0.546134	0.588979	0.511983	0.5266	0.570556	0.562981	0.579764	0.549254	0.547619	0.571895	0.524104	0.592833	0.582063	0.61877	0.524844	0.583794	0.483756	0.615464	0.568264	0.547289	0.591897	0.525185	0.547004	0.594986	0.571932
G42	0.00249858	0.00250286	0.00199213	0.00384845	0.00249998	0.00272971	0.00237494	0.00255389	0.00209966	0.00320642	0.00235591	0.00193676	0.0024832	0.00320281	0.00219932	0.00218141	0.00345368	0.00245186	0.00240229	0.00219521	0.00287799	0.00249202	0.00372412	0.00324472	0.00233063	0.00258109	0.00235599	0.00258741	0.00251034	0.00223553	0.00191544	0.00288248	0.00236441	0.0024657	0.00233389	0.00232146	0.00224644	0.00321708	0.00306963	0.00285291	0.00276144	0.00297534	0.00253666	0.00223083	0.00292275	0.00242061	0.00278478	0.00246607	0.00261251
G43	0.000689263	0.000786916	0.000726007	0.000927661	0.000922327	0.000728448	0.000678338	0.00089692	0.000736473	0.000692616	0.000630325	0.000639889	0.000695664	0.000724131	0.000785759	0.000674785	0.000722006	0.00059431	0.000692412	0.000762959	0.000781641	0.000723638	0.000765912	0.000820096	0.000758489	0.000745823	0.000682058	0.000626816	0.000681257	0.000628535	0.000814925	0.00078027	0.000660157	0.00160433	0.000571353	0.000702426	0.000624636	0.000823107	0.000803812	0.000747385	0.000686702	0.000779117	0.000795488	0.000703002	0.000766837	0.000618317	0.000714199	0.000634224	0.000785763
G44	0.000671322	0.000503596	0.000520832	0.000828306	0.000625348	0.000601042	0.000571555	0.000825102	0.000553231	0.000708325	0.000590622	0.000577987	0.000567124	0.000601158	0.000584279	0.000645532	0.00075723	0.000570855	0.000557582	0.000576201	0.000661919	0.00067067	0.000664255	0.000598432	0.000626094	0.000601299	0.000604919	0.000603319	0.000595928	0.00060509	0.000627469	0.000579721	0.000585241	0.00120077	0.000555589	0.000587579	0.00048927	0.00072472	0.000739886	0.000641256	0.000690398	0.000677312	0.000591744	0.000567786	0.000667876	0.000614165	0.000520688	0.000515131	0.0006767
G45	0.00962558	0.0201291	0.0310805	0.0125431	0.00799517	0.0232841	0.00454717	0.0259498	0.0395982	0.00734697	0.0127256	0.0241389	0.0110197	0.0240311	0.0574139	0.0100087	0.0192695	0.0197012	0.0319211	0.014831	0.0133635	0.0299793	0.00418477	0.023035	0.0127466	0.0389391	0.0120772	0.0189561	0.0131301	0.0111087	0.0245989	0.0260702	0.0166485	0.0103016	0.0491271	0.0685406	0.0458208	0.0219663	0.0264824	0.0100079	0.00967837	0.0159083	0.0150139	0.0173027	0.0177415	0.0399431	0.0163031	0.0400624	0.01476
G46	0.0141869	0.0157071	0.0189784	0.0243	0.0849967	0.0185276	0.0833326	0.0182479	0.0258616	0.0246169	0.0168134	0.0184274	0.0210318	0.0152226	0.0115946	0.0165241	0.0225101	0.0191349	0.0173113	0.0161302	0.0227625	0.017239	0.0283081	0.0161156	0.0205739	0.0155914	0.060424	0.0171038	0.0250776	0.017682	0.0279544	0.0111247	0.0230234	0.0144124	0.0197354	0.0213158	0.0128185	0.0177824	0.0133615	0.0616137	0.0183299	0.0158136	0.0161457	0.0143917	0.0217247	0.0169119	0.0182053	0.0150668	0.0163946
G47	0.0123398	0.0131607	0.0141474	0.00922515	0.00576602	0.0125289	0.00979773	0.0114485	0.0115669	0.00974618	0.00959656	0.0108318	0.0131267	0.0149597	0.0107964	0.0118667	0.0105455	0.0137884	0.0106305	0.00953445	0.00987453	0.0121208	0.0150883	0.0111182	0.0100882	0.00839784	0.00820665	0.0135704	0.00973273	0.0139038	0.0118184	0.0131877	0.0125862	0.0115058	0.00827512	0.011607	0.0124099	0.0113285	0.0108143	0.0102113	0.0131903	0.0115059	0.0160737	0.0151924	0.00984077	0.0129615	0.011013	0.00774668	0.00953636
G48	0.00135938	0.00123507	0.00144663	0.00142147	0.00152116	0.00107371	0.00102536	0.00145929	0.000904671	0.00127453	0.00102917	0.00133995	0.0014628	0.00136105	0.00167394	0.00147585	0.00166498	0.00114441	0.0011376	0.00127125	0.00171021	0.00175878	0.00162979	0.00142645	0.00112123	0.00143767	0.00104435	0.00140868	0.00141684	0.000886294	0.00153889	0.00170431	0.00167517	0.00174539	0.00129652	0.00136731	0.00118931	0.00155041	0.0015425	0.00149749	0.0013553	0.00191917	0.00123424	0.00137913	0.00161612	0.00106093	0.00132041	0.00151498	0.00160433
G49	0.00114061	0.00155441	0.00168872	0.00125464	0.00138013	0.00134498	0.00132466	0.0011594	0.00150183	0.00133695	0.00138239	0.00151957	0.00177043	0.00157055	0.00130294	0.00137954	0.00120578	0.00158543	0.00137945	0.00118944	0.00152132	0.00142693	0.00125133	0.00119522	0.000861743	0.00128608	0.00113979	0.00156018	0.00132932	0.00118589	0.00117423	0.00175957	0.00146772	0.00137641	0.00136075	0.00159411	0.00140826	0.0017614	0.00169764	0.00117751	0.00131951	0.00152791	0.00140427	0.0015198	0.00132628	0.00148823	0.00132873	0.00132441	0.00136547
G50	0.000890303	0.0012889	0.00111226	0.00118156	0.00102232	0.00101056	0.000931703	0.00105655	0.000904826	0.000945571	0.00113362	0.000865992	0.000938166	0.000935277	0.00101992	0.000950424	0.000867777	0.00121737	0.000938229	0.000848455	0.00123333	0.00112052	0.00106801	0.00118843	0.00113754	0.00102847	0.00119389	0.00097375	0.00094581	0.0007447	0.00096415	0.00123748	0.00112516	0.00116145	0.000960999	0.000940716	0.000999401	0.00120998	0.00101156	0.00103947	0.000791158	0.00107385	0.00115166	0.00094332	0.00119306	0.00103617	0.00108412	0.000971911	0.00119791
G51	0.00128187	0.0010604	0.00124544	0.00148241	0.00162462	0.00116277	0.00132537	0.00168846	0.00132503	0.00126899	0.00119362	0.000877896	0.00103566	0.00124017	0.0014646	0.00155537	0.00143264	0.00114005	0.00131007	0.0013496	0.00173174	0.00108614	0.00128019	0.00155326	0.000974953	0.00169161	0.00112944	0.00134666	0.00138613	0.00125914	0.00132397	0.00136433	0.00149513	0.00125564	0.00128963	0.00128293	0.00105918	0.00154747	0.00122343	0.00180408	0.00110497	0.00152046	0.0015866	0.00132757	0.0015278	0.00112179	0.00151022	0.00139025	0.00116158
G52	0.0071601	0.00712773	0.00763343	0.00545312	0.00521059	0.00612204	0.00618562	0.00601217	0.00649484	0.0045901	0.00609916	0.00506877	0.00547689	0.00619357	0.00485154	0.00690009	0.00571279	0.00592956	0.00555844	0.0051487	0.00574542	0.00610667	0.006118	0.00599478	0.00624224	0.00635163	0.00496161	0.00606197	0.00659535	0.006253	0.00686358	0.00671008	0.00596853	0.00652877	0.00523238	0.00642464	0.00588148	0.00645354	0.00824272	0.00599857	0.00599077	0.00827451	0.00673223	0.00659699	0.0066217	0.00584839	0.00668191	0.00595398	0.00698242
G53	0.000859301	0.000710783	0.000735852	0.000961705	0.000754254	0.000868522	0.000740702	0.000723684	0.000626759	0.000687932	0.00074672	0.000780513	0.000689496	0.000848334	0.000793607	0.000746105	0.000727011	0.000766806	0.000768316	0.000769934	0.000737967	0.000792103	0.000816607	0.00103437	0.000768546	0.000712398	0.000720468	0.000643027	0.000760203	0.000868027	0.000719863	0.000905895	0.000654263	0.000709583	0.000608135	0.000769063	0.000735713	0.000943172	0.00101367	0.000705565	0.000585209	0.000709687	0.000787085	0.000694829	0.000748897	0.000734222	0.000633514	0.000732245	0.000740059
G54	0.112157	0.0947752	0.0913298	0.0894281	0.0942385	0.0789652	0.101	0.112326	0.0881318	0.130295	0.10898	0.118335	0.122054	0.112123	0.0922776	0.14032	0.122064	0.118231	0.108905	0.0815389	0.113832	0.0877289	0.112684	0.120863	0.0921009	0.0985774	0.0861229	0.126747	0.111268	0.100055	0.0985015	0.120846	0.119433	0.131684	0.0867772	0.112666	0.106246	0.130627	0.105242	0.0917168	0.12411	0.0897211	0.110119	0.155153	0.114754	0.101886	0.124708	0.0967138	0.120063
G55	0.02078	0.0177855	0.0160303	0.0150523	0.0210269	0.0192515	0.0178646	0.0186135	0.0185121	0.0177698	0.0138142	0.0229396	0.0214027	0.0166361	0.0282891	0.0143493	0.0137617	0.0172684	0.0145488	0.0179751	0.019865	0.0176861	0.0115986	0.0146953	0.0213756	0.0145542	0.0191572	0.0202628	0.0179207	0.0201068	0.0175256	0.0229676	0.0157181	0.0213331	0.0168162	0.0190135	0.0173415	0.0192591	0.0156083	0.0145637	0.0194799	0.0245065	0.0207343	0.0124767	0.0143391	0.0196452	0.0117575	0.0141688	0.0182438
G56	0.017781	0.0108149	0.0143807	0.0283304	0.124514	0.0120451	0.0718278	0.0251157	0.0216343	0.0377829	0.0232389	0.0165494	0.0448655	0.0137667	0.00978143	0.0242752	0.0210323	0.0298689	0.0185427	0.0386734	0.0219401	0.01736	0.0299969	0.0201146	0.0367982	0.0203191	0.0851245	0.0113454	0.0246371	0.0171274	0.0511748	0.0101451	0.0267518	0.0106017	0.0164679	0.0183807	0.0226164	0.0157399	0.00701979	0.128969	0.0244554	0.0151138	0.035265	0.0272246	0.0211196	0.012898	0.0150809	0.0210562	0.0219984
G57	0.021984	0.027527	0.0321913	0.0319074	0.0172033	0.0360484	0.0284222	0.0203986	0.0293161	0.0270846	0.0280755	0.0271674	0.0244691	0.0328617	0.0304033	0.0225088	0.0326477	0.0384097	0.0238497	0.0312164	0.0298702	0.0328582	0.0337018	0.0229374	0.0253088	0.0302297	0.0295758	0.0317324	0.0316238	0.0305723	0.0200154	0.0231961	0.0312244	0.0211332	0.0359179	0.022586	0.0263872	0.0251486	0.0280449	0.0249659	0.0315346	0.0197274	0.0225495	0.0173788	0.0297585	0.042317	0.0354415	0.0293775	0.0295421
G58	0.00309817	0.00343168	0.0033076	0.00374261	0.00399744	0.00324526	0.00251756	0.00347051	0.00315802	0.00273052	0.00317152	0.00332909	0.00320919	0.00327647	0.00345861	0.00322156	0.00276743	0.00267045	0.00316915	0.00274251	0.00381868	0.00374687	0.00314797	0.00338039	0.00394368	0.00287468	0.00319533	0.00297621	0.00262794	0.00277302	0.00317072	0.00418744	0.00322697	0.00346832	0.00260662	0.00360219	0.00320947	0.00450404	0.00335571	0.00324124	0.00336078	0.00360843	0.00322681	0.00288871	0.00357615	0.00331022	0.0035493	0.00283053	0.00359911
G59	0.00207234	0.00198839	0.00233946	0.00688362	0.0114612	0.00206752	0.0198661	0.00397964	0.0037221	0.00556449	0.00254891	0.00245764	0.00427928	0.00247457	0.0019879	0.00196503	0.00281469	0.00234881	0.00185064	0.00195319	0.00259048	0.00201318	0.00341143	0.00293801	0.00383801	0.00268885	0.00833336	0.00213097	0.00276159	0.00307278	0.00381251	0.00212465	0.00377152	0.00312046	0.00163315	0.00235557	0.00240074	0.00354793	0.00218642	0.00798645	0.00285323	0.00204852	0.00292837	0.00235877	0.00245343	0.00205448	0.00278241	0.00259494	0.00206606
G60	0.00196714	0.00206032	0.00232692	0.00222264	0.00207059	0.00206085	0.00152817	0.00210179	0.00167858	0.00193442	0.00219086	0.00178612	0.00193413	0.00204048	0.0019626	0.00211913	0.00212845	0.00194099	0.00168457	0.00147503	0.00200845	0.00267052	0.00206	0.00182829	0.00237839	0.00222218	0.00203682	0.00204617	0.00215812	0.00173102	0.00218722	0.002918	0.00225742	0.00216231	0.00190598	0.00193255	0.00181711	0.00251739	0.00192688	0.00243703	0.00205841	0.00235831	0.00178124	0.00231715	0.00226768	0.00204627	0.00208842	0.00168756	0.00244948
G61	0.00101602	0.000976394	0.000824741	0.0013602	0.00114848	0.00110071	0.000919446	0.000935278	0.00103156	0.00119083	0.000901325	0.000934686	0.000823933	0.00128561	0.00130589	0.000973732	0.00084968	0.000904455	0.000770658	0.000965446	0.000974295	0.00101724	0.00146018	0.000778081	0.00113883	0.000883983	0.000782341	0.000968021	0.000898683	0.000817425	0.00084611	0.0012782	0.000915567	0.00115287	0.000897948	0.000951671	0.00095508	0.00118618	0.00136355	0.000956773	0.00109743	0.00111875	0.000983748	0.00108741	0.00117062	0.00091544	0.00128462	0.000912393	0.00130057
G62	0.0594781	0.0473688	0.0640065	0.0531113	0.0538848	0.054643	0.0593623	0.0606219	0.0639373	0.0612448	0.0675656	0.0727818	0.0612088	0.0581475	0.0392196	0.0607902	0.0591996	0.0713403	0.066362	0.0609036	0.0620791	0.0594636	0.0607948	0.0528505	0.0573987	0.051788	0.044353	0.0644704	0.0595358	0.0644763	0.0736997	0.0615431	0.0689575	0.0610664	0.0500163	0.0627023	0.0620533	0.0684651	0.0537017	0.061486	0.0653066	0.0507377	0.0607123	0.0697024	0.0568141	0.0563731	0.0584069	0.0505285	0.0575816
G63	0.000286212	0.000344751	0.000267957	0.000281334	0.000524478	0.000261274	0.000320438	0.00035509	0.000292286	0.000302049	0.000267159	0.000279629	0.000300399	0.00029732	0.000299318	0.00105155	0.000340308	0.000271422	0.00027391	0.000301563	0.000302331	0.000333225	0.000274639	0.000325223	0.00030272	0.000319066	0.000268235	0.00032616	0.000367877	0.000249534	0.000263916	0.000339259	0.000306403	0.000371347	0.000225781	0.000285745	0.000313653	0.000291276	0.000287138	0.000318586	0.000305506	0.000286653	0.000363187	0.000309065	0.000293125	0.000238765	0.000279811	0.000294146	0.000277821
G64	0.00509593	0.00432734	0.00477908	0.00432262	0.00496452	0.00522278	0.00497051	0.00570044	0.00415481	0.00531511	0.00396596	0.00567663	0.00593239	0.00548024	0.00637408	0.00468617	0.00391829	0.00437329	0.00443615	0.00480338	0.0047226	0.00504679	0.00408706	0.00467883	0.00589056	0.00459282	0.00481794	0.00536235	0.00466874	0.00477743	0.00586916	0.00544784	0.0044311	0.00541304	0.00397694	0.00442268	0.00438144	0.00433069	0.00516846	0.00431979	0.00605501	0.00629803	0.00588659	0.00478404	0.00389915	0.00464422	0.00384224	0.00423132	0.00482818
G65	0.00392579	0.00479229	0.0040748	0.00296968	0.00490873	0.00407019	0.00389921	0.00370161	0.00486603	0.00224596	0.00446401	0.0027315	0.00439873	0.00424658	0.00326285	0.00420931	0.00456815	0.00458421	0.00422451	0.00497268	0.00420649	0.00420525	0.00449999	0.00313518	0.00300797	0.00534376	0.0050499	0.00403791	0.00472877	0.00429082	0.00416026	0.00369749	0.00485415	0.00203816	0.00612765	0.00402095	0.00374843	0.00385272	0.00253966	0.00353081	0.00259247	0.00359722	0.00290239	0.00359297	0.0045747	0.00457056	0.00401616	0.00450663	0.00272149
G66	0.00358633	0.00333554	0.00336011	0.00336746	0.00384322	0.00291961	0.0027204	0.00378064	0.00313469	0.0030328	0.00294442	0.00324066	0.00358601	0.0033171	0.00419167	0.00313798	0.00290085	0.00349429	0.00324515	0.00320125	0.00321416	0.0035185	0.00305412	0.00343623	0.00360877	0.00292528	0.00355191	0.0033215	0.00321635	0.00328521	0.00314796	0.00396901	0.00324168	0.00321206	0.0028176	0.00309015	0.00336223	0.00364642	0.00325767	0.00302121	0.00381899	0.00381624	0.00373404	0.00289697	0.00302083	0.00337186	0.00285599	0.00299411	0.00330793
G67	0.000392103	0.000526006	0.000490758	0.000462856	0.000507206	0.00048087	0.000454785	0.000462822	0.000433755	0.000431054	0.000455226	0.000438448	0.000500411	0.00049214	0.000409043	0.000347236	0.000423353	0.000504646	0.000512102	0.000507885	0.000419093	0.000578248	0.000503835	0.000391283	0.000564315	0.000463252	0.000447232	0.000568839	0.000417897	0.000479218	0.000457001	0.000497252	0.000454672	0.000610626	0.000482175	0.000424043	0.000465238	0.000518081	0.000479572	0.000573532	0.000403566	0.000418604	0.000422062	0.000461584	0.000463338	0.000446069	0.000548623	0.000380037	0.000443943
G68	0.0088491	0.00712422	0.00556398	0.0120525	0.00526096	0.00578944	0.0058726	0.0112044	0.00762952	0.00954898	0.00692254	0.00622361	0.00856676	0.00856292	0.0164232	0.00886452	0.011491	0.0109083	0.00587133	0.00569987	0.0100238	0.00714549	0.0120917	0.0116335	0.00771893	0.00929091	0.00913217	0.0104516	0.0104532	0.00537456	0.005091	0.00611586	0.00982268	0.0118109	0.00787962	0.00495317	0.00502708	0.00918669	0.0160666	0.0053708	0.00961224	0.00676362	0.0109427	0.00580372	0.0110913	0.016995	0.0057502	0.00936404	0.0111541
G69	0.00171762	0.00225655	0.0014682	0.00190592	0.0016331	0.00134152	0.00128381	0.00138092	0.00172126	0.0012266	0.00136957	0.00146189	0.00216962	0.00186569	0.00307472	0.00218705	0.0014576	0.0020244	0.00149891	0.00171751	0.00170763	0.00187992	0.00140286	0.00198695	0.00139947	0.00165329	0.00176865	0.00165775	0.00188651	0.00158073	0.00172611	0.0018156	0.00190643	0.000906674	0.00215713	0.00155499	0.00180473	0.00174892	0.00258875	0.00126033	0.00191963	0.00215284	0.00168386	0.00179837	0.00184492	0.00219479	0.00184163	0.00173506	0.00150762
G70	0.00319056	0.00310075	0.00307009	0.00365697	0.00528075	0.00273839	0.00226644	0.00279838	0.00266963	0.0034766	0.00329229	0.00306755	0.00220418	0.00298913	0.00286874	0.00378501	0.00289675	0.00218664	0.00261623	0.00278146	0.00276329	0.00419806	0.00259362	0.00424787	0.00344855	0.00286714	0.00260867	0.00225905	0.0024562	0.00268275	0.00203225	0.00452901	0.00302075	0.00378527	0.00227201	0.00244664	0.00400317	0.00394843	0.00383426	0.00417518	0.00460919	0.00356607	0.00335075	0.00242816	0.00293301	0.00310517	0.00325354	0.00259102	0.00369844
G71	0.00175049	0.00176774	0.00187999	0.00245489	0.00208242	0.00163536	0.00153966	0.00173406	0.00186003	0.00197012	0.00173128	0.00149841	0.00170205	0.00188578	0.00184418	0.00183031	0.00200047	0.0016557	0.00170664	0.00176774	0.0019807	0.00180189	0.00194013	0.00216282	0.00191244	0.00174582	0.0015156	0.00161236	0.00173343	0.00170358	0.00140907	0.00223263	0.00187635	0.00194178	0.00150285	0.00154257	0.00160076	0.00225673	0.00215226	0.00208974	0.00185755	0.00217464	0.00181446	0.0017373	0.00196764	0.00174425	0.00193079	0.00171624	0.00185884
G72	0.00156949	0.00275515	0.00256405	0.00275711	0.0027203	0.00285649	0.00239997	0.00253638	0.00231292	0.00273763	0.00246483	0.00309235	0.00245471	0.00205679	0.00309672	0.00320496	0.00229537	0.00290083	0.00232819	0.002304	0.00268601	0.00334654	0.00204371	0.0032321	0.00220983	0.00263643	0.00212369	0.00249166	0.00287827	0.00268045	0.00256396	0.00271363	0.00304112	0.00210533	0.00190723	0.00327797	0.00251162	0.00345884	0.00307735	0.00238892	0.0033988	0.00320176	0.00324194	0.00291019	0.00237308	0.00261155	0.00283598	0.00238286	0.00326701
G73	0.00126956	0.00120899	0.000984652	0.00125678	0.0012587	0.00107711	0.00086063	0.00116609	0.0010585	0.00103626	0.0010227	0.00101308	0.00440773	0.00108362	0.00109902	0.00102311	0.00104981	0.00114914	0.00101171	0.00113013	0.000956525	0.00101025	0.00111682	0.000971751	0.0011195	0.00110556	0.000962133	0.00121258	0.000975846	0.000912274	0.000976227	0.00109192	0.00107084	0.00144791	0.00109747	0.000995314	0.000978217	0.0011634	0.0014436	0.00122547	0.00101143	0.00139857	0.00101868	0.000994958	0.00117473	0.00109471	0.00125543	0.000983267	0.00114924
G74	0.00431998	0.00395864	0.00402361	0.00532897	0.00496126	0.00434428	0.00449435	0.00398457	0.00385332	0.00481639	0.00382747	0.0040298	0.00452201	0.0040561	0.00427701	0.00389203	0.00416277	0.00427371	0.00404886	0.00387252	0.0047897	0.00478079	0.00372878	0.0037165	0.00518626	0.00401247	0.00423125	0.00493928	0.00354961	0.00375358	0.00381476	0.00517085	0.00380969	0.00583604	0.00374448	0.00365993	0.00354102	0.00507313	0.00353111	0.00420761	0.0149971	0.00458237	0.00372175	0.00352136	0.00413135	0.00478598	0.00468072	0.00353679	0.00557733
G75	0.00202087	0.00196944	0.00213667	0.00227389	0.00234667	0.00157215	0.00201656	0.00198791	0.00174533	0.00203038	0.0020549	0.00177844	0.00212615	0.00189595	0.0021266	0.00190674	0.00179396	0.0015814	0.00160115	0.00187829	0.00210479	0.00240487	0.00266834	0.00228855	0.00173457	0.0018695	0.00170627	0.00182457	0.00220789	0.00161358	0.00186767	0.00234813	0.00217885	0.00224481	0.00195659	0.00163374	0.00174041	0.0025653	0.00257498	0.00202395	0.00246239	0.00211819	0.00176813	0.00211714	0.00219552	0.00173607	0.00230305	0.0017617	0.00200856
G76	0.00599908	0.00382061	0.00477234	0.00508585	0.00669688	0.00389601	0.00494107	0.00437761	0.00438874	0.00459702	0.00269379	0.00513315	0.00322655	0.00521486	0.00597273	0.00443419	0.0048851	0.00561024	0.00681382	0.00376732	0.00555304	0.00591784	0.00465479	0.00354512	0.00558814	0.00426453	0.00562895	0.0042835	0.00460741	0.00421155	0.00423524	0.00452308	0.00336793	0.00308708	0.00488143	0.00704859	0.0054438	0.00367047	0.00349994	0.0051936	0.00615166	0.00659934	0.00400239	0.0041423	0.00477271	0.00479876	0.00452686	0.00386596	0.00717286
G77	0.017364	0.0150306	0.0251784	0.026344	0.0915678	0.0172454	0.0558107	0.0337879	0.0258569	0.0162524	0.0205664	0.0202894	0.0206432	0.00913584	0.00927002	0.0136603	0.0200556	0.0151282	0.0155691	0.0271862	0.0191125	0.0218913	0.0159263	0.0182424	0.0182557	0.0193624	0.0357787	0.0104601	0.0208441	0.0177059	0.0317456	0.0118817	0.0278121	0.0114342	0.0225385	0.0230202	0.0230893	0.022901	0.00860033	0.0984812	0.0127046	0.0182622	0.0136119	0.0166629	0.0197786	0.0165615	0.0198923	0.0215522	0.0207169
G78	0.000997968	0.0010136	0.00101679	0.00123171	0.00117967	0.000849695	0.000850191	0.00107793	0.000833718	0.000784703	0.00104324	0.000655552	0.00079105	0.000870723	0.00100357	0.000853368	0.00102213	0.000828395	0.000902871	0.00101499	0.00101944	0.00130606	0.00114499	0.00122447	0.00112463	0.000930491	0.000846346	0.00098523	0.000999784	0.000830901	0.00113119	0.00128129	0.00100496	0.0010983	0.000956674	0.000992995	0.000780656	0.000993353	0.00103396	0.00120956	0.00085346	0.000990666	0.000959615	0.000851972	0.00116833	0.00096375	0.000999984	0.000872242	0.000904744
G79	0.00578536	0.00544604	0.00876502	0.00497337	0.00709274	0.00678702	0.00550831	0.00581354	0.0066281	0.00636557	0.00521031	0.0059732	0.00673215	0.00649819	0.00620606	0.00746175	0.0068682	0.00826837	0.00691129	0.0104495	0.00712546	0.0078854	0.00617592	0.0064915	0.0065801	0.00632811	0.00855016	0.00649494	0.0066318	0.00531929	0.00779455	0.00576198	0.00597516	0.00537487	0.00555051	0.00558882	0.00575461	0.00558459	0.00593001	0.00655957	0.00706618	0.00655126	0.00907531	0.00577945	0.00610457	0.00654962	0.00756574	0.0060278	0.00705379
G80	0.00250887	0.00288435	0.00285968	0.00302793	0.00391024	0.00300923	0.0026408	0.00337205	0.00266139	0.00294426	0.00280451	0.00267813	0.00288785	0.00287265	0.00290971	0.00300554	0.00309547	0.0025964	0.00269638	0.00271709	0.00335618	0.00296648	0.00356768	0.00353757	0.00337803	0.00279845	0.00247818	0.002967	0.00281107	0.0027271	0.00269836	0.0036701	0.00310278	0.003119	0.00246796	0.00284026	0.00245914	0.00287707	0.00344802	0.00306044	0.00292208	0.00335903	0.00298358	0.00277853	0.0033073	0.00279554	0.00326943	0.00260068	0.00334948
G81	0.00366167	0.00478564	0.00554483	0.00528	0.00725838	0.00500578	0.00467789	0.00673218	0.00411839	0.00448681	0.00550964	0.0050178	0.00437671	0.00500712	0.00693386	0.00522397	0.00690779	0.00420161	0.00429101	0.00388142	0.00625308	0.0086293	0.00482913	0.0056521	0.00544647	0.00480748	0.00529199	0.00472646	0.00485717	0.0041183	0.0054285	0.00780107	0.00519768	0.00557685	0.00409748	0.00523264	0.0048518	0.00758018	0.00511757	0.00569971	0.00502097	0.00679646	0.00453935	0.00367883	0.0060931	0.00573837	0.00439285	0.00481916	0.00506009
G82	0.00107862	0.0010177	0.00111859	0.00135151	0.00156829	0.00101825	0.000968516	0.00109744	0.00103066	0.00135577	0.00119633	0.0012859	0.000991548	0.00115821	0.00110755	0.0010649	0.00111553	0.00107006	0.00107927	0.00102382	0.0012554	0.00127183	0.00148629	0.00102347	0.000938513	0.00112835	0.000975924	0.00104866	0.0010714	0.000986334	0.000975469	0.00123226	0.0011529	0.00136417	0.00114542	0.000984487	0.00100816	0.00125558	0.00113599	0.00122252	0.00113509	0.00121795	0.00105831	0.00107306	0.00128829	0.00110354	0.00123144	0.00104948	0.00108851
G83	0.0014789	0.00165399	0.00155736	0.00174863	0.00193957	0.00146585	0.00179394	0.00144069	0.0012658	0.00184935	0.001313	0.00148801	0.00133969	0.00148419	0.00154705	0.00141024	0.00153876	0.0014538	0.00149745	0.0012956	0.00166626	0.00231091	0.00153862	0.00177156	0.00225367	0.0012958	0.00151269	0.001527	0.00135201	0.00110926	0.00164896	0.00187734	0.00179355	0.00201237	0.00125921	0.00128973	0.001417	0.00182022	0.00205343	0.00178146	0.00169347	0.0016554	0.0014495	0.00134826	0.00141633	0.00147806	0.00144458	0.00128689	0.00185612
G84	0.0112153	0.00505815	0.00709528	0.00708287	0.0174327	0.00283969	0.00733915	0.010016	0.00575207	0.00473652	0.0105842	0.0518618	0.0110754	0.0249074	0.00626951	0.0234645	0.0090911	0.0646034	0.00500173	0.00395558	0.00764851	0.00524509	0.00586561	0.00274492	0.0157696	0.0061861	0.0270837	0.0113897	0.00755429	0.005086	0.0235978	0.00434305	0.00600014	0.00453293	0.0238103	0.00403109	0.00770877	0.0111378	0.0109419	0.00485571	0.00304822	0.0120018	0.00449125	0.0128409	0.00944009	0.0115733	0.00842597	0.00633894	0.00771
G85	0.0112055	0.011623	0.0138776	0.0119373	0.175406	0.015871	0.192138	0.0128978	0.0303255	0.0189409	0.0113402	0.0128954	0.0324947	0.0138883	0.00658716	0.0114165	0.0206365	0.0238856	0.0163707	0.0181194	0.0249225	0.016982	0.0296304	0.012112	0.0329162	0.00955298	0.143586	0.0144458	0.0278822	0.0183316	0.0639032	0.00669531	0.0197871	0.00727421	0.0116036	0.0203037	0.0176037	0.0100303	0.00755189	0.10358	0.0247982	0.00816244	0.0139623	0.0101893	0.0200092	0.0157844	0.0126824	0.00991082	0.0145129
G86	0.00342035	0.00377236	0.00314345	0.00336528	0.00324699	0.0029908	0.0032736	0.00330036	0.00317121	0.00230025	0.00318587	0.00255058	0.0033997	0.00487327	0.00393037	0.00326708	0.00306326	0.00380741	0.00367661	0.00431594	0.00363688	0.00363211	0.00410506	0.00343766	0.00271038	0.00333285	0.00398028	0.00358013	0.00339708	0.00324263	0.00273929	0.00371674	0.00268775	0.00362323	0.00292086	0.00275653	0.00332618	0.00484635	0.00354868	0.00357042	0.00426865	0.00396395	0.00370748	0.00415656	0.00390321	0.00309259	0.00348408	0.00333575	0.00268947
G87	0.00948872	0.00194411	0.0139715	0.00189839	0.00111327	0.00147496	0.00188671	0.00483896	0.00336012	0.00228873	0.00285522	0.00741489	0.00344168	0.00235528	0.00803546	0.00880824	0.00295279	0.00293716	0.00266353	0.00376611	0.00375202	0.00766468	0.00253635	0.00555654	0.00381152	0.00980303	0.00386476	0.00326176	0.00467121	0.00499847	0.00596625	0.00828708	0.00353873	0.00303937	0.00383408	0.00354775	0.00588491	0.00493545	0.0057763	0.0045958	0.00194306	0.00846489	0.00311438	0.00857199	0.00274351	0.00301517	0.00279793	0.0101066	0.00254966
G88	0.00109934	0.000943353	0.00100835	0.00147633	0.00122989	0.000986241	0.00103389	0.00140904	0.00111507	0.000690487	0.000826743	0.000686019	0.00103229	0.000912254	0.00102974	0.00109221	0.00108259	0.00107574	0.000909579	0.00105352	0.00102954	0.000884742	0.000791788	0.00125544	0.00151962	0.00109187	0.000944854	0.00112787	0.00103651	0.00099179	0.00110617	0.0011734	0.00110741	0.00119775	0.00107194	0.000944538	0.000850149	0.00107146	0.00081741	0.00122114	0.000894452	0.00094384	0.000936217	0.000965356	0.00102725	0.000942192	0.00100147	0.00101625	0.00105046
G89	0.00545683	0.00642732	0.00498103	0.00505451	0.00653973	0.00588381	0.00490506	0.00576908	0.00512082	0.00655304	0.00456031	0.00416829	0.00667829	0.0064699	0.00526054	0.00533371	0.00467686	0.00516538	0.00516651	0.00598249	0.00607955	0.00604767	0.00526682	0.00563497	0.0054163	0.00478909	0.0050926	0.00506916	0.00527903	0.00570986	0.00490501	0.00668036	0.00526485	0.00586874	0.00487952	0.00500338	0.00469078	0.00769705	0.0039742	0.00616358	0.0057617	0.00657538	0.00524465	0.00638033	0.00529978	0.00493744	0.00484888	0.00452238	0.00536642
G90	0.00140032	0.00177261	0.00172481	0.0023606	0.00206446	0.00192477	0.00183952	0.00159787	0.00202975	0.00210303	0.00177816	0.00187919	0.00167166	0.00191042	0.00177884	0.00176176	0.00179154	0.00154354	0.00162556	0.001725	0.00198107	0.00178161	0.00199545	0.00181351	0.00207407	0.0017204	0.00173657	0.00191364	0.0017719	0.00150285	0.00152049	0.00220147	0.00179334	0.00238205	0.00166425	0.00169774	0.00174089	0.00205895	0.0023412	0.00216038	0.00273866	0.00222525	0.00203111	0.00209671	0.00225748	0.001637	0.00207817	0.00158644	0.002082
G91	0.0026543	0.00246122	0.00185226	0.00308026	0.00218126	0.00201403	0.00150817	0.00204979	0.0018521	0.00228228	0.00202853	0.00228829	0.00208426	0.00211115	0.00240819	0.00232367	0.00252597	0.00167167	0.00201275	0.0018552	0.00263466	0.00251323	0.00255959	0.00270491	0.0018238	0.00193823	0.00202067	0.0022171	0.00185079	0.00200736	0.00191577	0.00255581	0.0017636	0.00285182	0.002243	0.00194661	0.00178999	0.00274747	0.00276084	0.00252399	0.0018121	0.00251533	0.00196492	0.00176195	0.00239514	0.00192596	0.00207249	0.00204596	0.00302514
G92	0.00276736	0.00288459	0.00343686	0.00308021	0.00327809	0.00283046	0.00244394	0.00332922	0.00275891	0.00358027	0.00258376	0.00243044	0.00270947	0.00271997	0.00347828	0.00309627	0.00328107	0.00274687	0.00277582	0.00211271	0.00375486	0.00332779	0.00317309	0.00393713	0.00260949	0.00305135	0.00316672	0.00294648	0.00318821	0.00261613	0.0028494	0.00347885	0.00322495	0.00299791	0.00264096	0.00292209	0.00268182	0.00380727	0.00298101	0.00321814	0.00237074	0.00341825	0.00296934	0.00286179	0.00357384	0.00256089	0.00277822	0.003277	0.00284499
G93	0.00103516	0.0010182	0.00104788	0.00103761	0.00112356	0.00106343	0.000813186	0.000941804	0.000761237	0.00102717	0.000914609	0.000742194	0.000881803	0.00104274	0.000912797	0.00081387	0.000913242	0.00088242	0.00103021	0.000995407	0.00120098	0.00101465	0.000942154	0.00100651	0.00107383	0.000937646	0.000992804	0.00122375	0.000846531	0.000834177	0.00103391	0.00113657	0.000930666	0.00106203	0.000925416	0.00090258	0.000933418	0.000944324	0.00145735	0.000896273	0.00103002	0.00120099	0.00106796	0.000961098	0.0010489	0.00091052	0.00106617	0.000881029	0.000741455
G94	0.00416042	0.0039031	0.00377221	0.00415879	0.0041032	0.0037284	0.00390745	0.00564004	0.00363106	0.00453484	0.00390519	0.00426754	0.00501469	0.00526593	0.00508688	0.00458616	0.00427521	0.00479268	0.0035978	0.00433286	0.00380533	0.00428975	0.00431759	0.00463102	0.00517849	0.00421561	0.00445257	0.00432354	0.00369155	0.00390706	0.00330972	0.00486796	0.00441676	0.005398	0.00381509	0.00376028	0.0040456	0.00453836	0.00534674	0.00407942	0.00476617	0.00414057	0.00769141	0.00474157	0.00438266	0.0040641	0.00419455	0.00387329	0.00491439
G95	0.0247354	0.0212793	0.0353425	0.033453	0.342779	0.0348779	0.276297	0.0550395	0.0558214	0.0659475	0.0325496	0.035848	0.0985911	0.0376788	0.0345738	0.0454143	0.0657777	0.0608707	0.0325039	0.0391484	0.0803144	0.0708628	0.0687394	0.0536229	0.0887353	0.0288385	0.305921	0.0378045	0.08737	0.0461381	0.0992349	0.0352152	0.052811	0.0358342	0.0316062	0.0582884	0.0444215	0.0436782	0.0223974	0.354597	0.0702256	0.0192464	0.0550437	0.0516188	0.0675225	0.0456424	0.0442724	0.0300522	0.0601285
G96	0.0168689	0.0171199	0.027836	0.0203089	0.273411	0.0346789	0.276544	0.0275632	0.0663547	0.0393194	0.0225077	0.0247932	0.0684926	0.0270718	0.0110118	0.0214252	0.0418176	0.0600885	0.0299134	0.042203	0.0680591	0.0330626	0.0568432	0.026463	0.0737349	0.017924	0.201568	0.0296845	0.0687232	0.0388393	0.130494	0.0132344	0.0502	0.0129422	0.0191328	0.0522742	0.0446633	0.0271521	0.00984834	0.233864	0.0562556	0.0124384	0.0316626	0.0146975	0.043251	0.0369749	0.0308708	0.0186616	0.0366245
G97	0.0331956	0.0456947	0.0479107	0.0472241	0.27008	0.0574087	0.181169	0.0440364	0.0795843	0.039376	0.0439688	0.027181	0.0441178	0.0345692	0.0273923	0.0264155	0.045308	0.0549343	0.0469368	0.0545181	0.0547695	0.0473	0.0484661	0.0382964	0.0526016	0.0398844	0.110996	0.0357401	0.061976	0.0467786	0.104112	0.0246033	0.0527864	0.0256277	0.0570252	0.0607183	0.0563114	0.0354589	0.0296514	0.16186	0.0342472	0.0281459	0.0429789	0.0217174	0.0473297	0.0534347	0.037881	0.0466125	0.0439052
G98	0.0151665	0.0160352	0.0179349	0.0169806	0.0692275	0.0167908	0.0607173	0.0177091	0.0240469	0.0134214	0.0192469	0.0133569	0.0191415	0.0158089	0.00789268	0.0162998	0.0226434	0.0210374	0.0157174	0.0201214	0.0238289	0.014521	0.0231183	0.0163356	0.0191956	0.0159242	0.0610791	0.0147471	0.0234171	0.0174559	0.0298599	0.0138271	0.0258875	0.0113976	0.0170551	0.019485	0.0156929	0.0180418	0.0102063	0.0577829	0.0175389	0.0141866	0.0124746	0.0143999	0.0226957	0.022149	0.0157785	0.0153774	0.0131299
G99	0.218933	0.255941	0.308015	0.469895	0.553299	0.321922	0.589896	0.337587	0.281388	0.561743	0.234466	0.241325	0.499363	0.258734	0.256541	0.250071	0.33028	0.292576	0.30404	0.316413	0.392567	0.281526	0.351665	0.289937	0.426445	0.268954	0.545137	0.327399	0.400913	0.213666	0.329313	0.227542	0.344511	0.301668	0.287382	0.328467	0.306278	0.329144	0.312828	0.528821	0.367041	0.218306	0.289208	0.292732	0.327608	0.299495	0.313921	0.283781	0.299883
G100	0.00102701	0.000973681	0.00113854	0.00119079	0.00159853	0.000760639	0.000957071	0.00139881	0.00113469	0.00117093	0.00115292	0.000757006	0.000946602	0.00118167	0.00109817	0.00113313	0.00135095	0.00116745	0.00111775	0.00143604	0.00131918	0.00110509	0.00142868	0.00147111	0.000894617	0.00133769	0.00095968	0.00106008	0.00108403	0.000769989	0.00107786	0.00122693	0.00144544	0.00173156	0.00116274	0.00120153	0.00094847	0.00146425	0.00135986	0.00103365	0.00134233	0.00140002	0.000856141	0.00113021	0.00185784	0.00105565	0.00122053	0.00100762	0.00100292
G101	0.00147485	0.00138442	0.00159668	0.00162974	0.0020973	0.00137684	0.00120604	0.00170859	0.00121837	0.00170217	0.00140761	0.0013962	0.00143832	0.00155465	0.00206744	0.00175008	0.00146634	0.00172824	0.00142995	0.00124158	0.00193286	0.00150563	0.00141212	0.00131726	0.00191686	0.00141667	0.00127499	0.00152556	0.00158726	0.00131498	0.00155094	0.0020507	0.00132593	0.00185607	0.00110208	0.00150302	0.00125226	0.00174078	0.00227823	0.00162821	0.00167286	0.0016104	0.00164865	0.00151402	0.00168509	0.00151528	0.00159608	0.00153828	0.00161585
G102	0.00154375	0.00180425	0.00117366	0.00216791	0.00134987	0.00222064	0.00158406	0.00126317	0.00202258	0.00141577	0.00136876	0.00121768	0.00123884	0.00125414	0.00216228	0.00107171	0.00168856	0.00155214	0.00159662	0.00177752	0.00132642	0.00170997	0.00232238	0.00115503	0.00178883	0.0013776	0.00247106	0.001501	0.00184154	0.000976626	0.00166852	0.0011671	0.00116702	0.00146491	0.00170671	0.00120113	0.0011894	0.000993387	0.00169969	0.00121785	0.00115314	0.0016798	0.00186248	0.00125253	0.00156402	0.00183777	0.00142181	0.0012793	0.00113396
G103	0.00118528	0.00141305	0.00119517	0.00158604	0.00142469	0.00132296	0.00119573	0.00113992	0.00119445	0.00131982	0.00116967	0.00104673	0.00127325	0.0013639	0.00132155	0.00114547	0.00116264	0.000974429	0.00139901	0.00103366	0.00130653	0.00156894	0.00103532	0.00128335	0.00150722	0.0010914	0.00137148	0.00135261	0.00114211	0.00131856	0.00117632	0.00147221	0.00121403	0.00148159	0.00120601	0.00116056	0.00113937	0.00146246	0.00157763	0.00144321	0.00166509	0.00134495	0.00142754	0.00125776	0.00145306	0.00120939	0.00122298	0.00118837	0.00154882
G104	0.00553705	0.00708076	0.00737883	0.00915646	0.00677093	0.00761137	0.00876161	0.00408801	0.00888619	0.00846546	0.00767367	0.00505897	0.00689912	0.00665739	0.00466214	0.00529104	0.0081611	0.00743962	0.00630548	0.00947805	0.00694473	0.00683956	0.0109881	0.00562215	0.00585429	0.00730029	0.0112269	0.00687938	0.00774609	0.00607609	0.00579188	0.00328868	0.00828455	0.00438923	0.0078195	0.00546298	0.00611053	0.00404469	0.00756411	0.0110813	0.00661098	0.00542547	0.00663394	0.00604852	0.00767297	0.00750056	0.0067614	0.00689785	0.00600733
G105	0.00110909	0.00140673	0.00170271	0.00161801	0.00191469	0.00125	0.0012098	0.00154111	0.00124407	0.00159198	0.00143112	0.00135781	0.00146819	0.00143832	0.00161926	0.0015129	0.00146842	0.00130938	0.00113624	0.00119633	0.00167122	0.00176814	0.00131975	0.00187904	0.0010477	0.00134734	0.00133005	0.00138722	0.0014791	0.00127518	0.00137664	0.00207908	0.00143073	0.00147685	0.00113488	0.00140047	0.00140671	0.00179247	0.00136785	0.00166233	0.00125307	0.00191647	0.00135745	0.00131837	0.00177348	0.00119089	0.00150835	0.00131377	0.00151876
G106	0.0273724	0.0331824	0.0355119	0.0410045	0.113981	0.0290754	0.151074	0.0661783	0.0249064	0.0390117	0.0379723	0.0313053	0.0654756	0.0237507	0.0233592	0.0410749	0.0513146	0.0319013	0.0334264	0.0363493	0.0261118	0.037256	0.0365367	0.0394392	0.0269595	0.0417132	0.0836565	0.0364169	0.0330716	0.0402116	0.0569378	0.0220016	0.0360452	0.0297083	0.022787	0.0370915	0.040978	0.0358551	0.0263885	0.0970998	0.031967	0.0202915	0.0370538	0.0304719	0.0490016	0.0293921	0.0273845	0.0410359	0.0468283
G107	0.000556499	0.000577363	0.000558145	0.000598309	0.000661014	0.000661971	0.000687839	0.000532806	0.000610779	0.000609247	0.000524377	0.000675447	0.000536371	0.000675253	0.000570918	0.000588776	0.000590259	0.000690282	0.000749299	0.00061372	0.00055069	0.000675751	0.000583037	0.000677366	0.000546762	0.00058865	0.000560758	0.000557979	0.000454855	0.000654277	0.000566009	0.000599414	0.000562991	0.000520956	0.000570563	0.000633728	0.000592254	0.000585948	0.000553954	0.000658568	0.000648734	0.00062855	0.000559333	0.00061059	0.000591535	0.000489085	0.00057501	0.000532469	0.0006258
G108	0.0134261	0.0114531	0.00828276	0.00768825	0.0215184	0.00824908	0.0185711	0.0110594	0.0103243	0.0143033	0.00896174	0.0125837	0.0199125	0.0103117	0.00992133	0.0124236	0.008669	0.0119558	0.00911218	0.0077678	0.0107297	0.00587506	0.0123291	0.00871747	0.0123313	0.00799167	0.0304997	0.011969	0.0114441	0.0106762	0.00931426	0.00928852	0.0101424	0.0101707	0.00589606	0.0094708	0.011288	0.0103634	0.00690737	0.024926	0.012657	0.00954403	0.0113245	0.0105709	0.00862052	0.0129477	0.00760253	0.00836182	0.0114998
G109	0.0020114	0.00240042	0.00190176	0.00179493	0.00292932	0.00197306	0.00182822	0.00188583	0.00197524	0.00198373	0.00188326	0.00181473	0.00205771	0.0019054	0.0022166	0.00199152	0.00166449	0.00177699	0.0019464	0.00190084	0.00246486	0.00250328	0.00188951	0.00191223	0.00198038	0.0017667	0.00187294	0.00237646	0.00208948	0.00157958	0.00212775	0.00271182	0.00169221	0.00191618	0.00204925	0.00186369	0.00206192	0.00205506	0.0022826	0.0022718	0.00208279	0.00278585	0.00198718	0.00174751	0.00219503	0.00224132	0.00211915	0.00217448	0.00160514
G110	0.00229108	0.00238871	0.00276389	0.00324641	0.00258887	0.00235872	0.00217818	0.00283622	0.0026548	0.00249313	0.00240555	0.00205382	0.00218391	0.00250333	0.00303278	0.00274024	0.00255641	0.00225868	0.00220627	0.00243278	0.00334202	0.00324889	0.00269029	0.00256315	0.00309824	0.00245779	0.00304248	0.002257	0.0027054	0.00209689	0.00237791	0.00325158	0.00253665	0.00305222	0.00184445	0.00235755	0.00261583	0.00311974	0.00249951	0.00293808	0.00198393	0.00254761	0.00210383	0.00265859	0.00284173	0.00321371	0.00216777	0.0025741	0.00269146
G111	0.000628708	0.000474438	0.000778779	0.000496104	0.000803461	0.000512268	0.000589461	0.000514942	0.000984115	0.000508189	0.000566173	0.000434295	0.000524764	0.000463023	0.000470689	0.000380223	0.000483939	0.00081531	0.000541727	0.000825775	0.000841044	0.000684755	0.000479769	0.000503191	0.000650955	0.000380248	0.00141677	0.000475445	0.000789464	0.00159339	0.000543834	0.000329652	0.000677514	0.000381711	0.000607977	0.000747544	0.000497832	0.000493851	0.000471168	0.000512997	0.000367065	0.000461467	0.000893017	0.000663003	0.000480978	0.000517485	0.000973901	0.000442748	0.00115883
G112	0.000751104	0.000923573	0.000876436	0.0011483	0.00109194	0.000889214	0.000811706	0.000920352	0.000916849	0.000919694	0.000862133	0.000874173	0.000964535	0.000825794	0.000946695	0.000868248	0.000830067	0.000870225	0.000805741	0.000764579	0.00124944	0.00084394	0.000817189	0.000759978	0.00104895	0.000764387	0.00106185	0.00103341	0.00077422	0.000821546	0.000902022	0.000947513	0.000795597	0.00102278	0.000836995	0.000935204	0.000741507	0.000870225	0.00116757	0.000762013	0.00106554	0.000922343	0.000777907	0.00106196	0.00100587	0.00103103	0.000971691	0.000790711	0.00111848
G113	0.000589385	0.0005937	0.000929827	0.000983285	0.0009486	0.000723207	0.000730886	0.000927032	0.00077147	0.000752739	0.0006623	0.000612771	0.0007467	0.000799589	0.000716887	0.000862006	0.00100644	0.000855762	0.000551457	0.000724537	0.000915761	0.000902055	0.000751771	0.00103505	0.00115281	0.000801963	0.00064404	0.000788355	0.000967836	0.000444922	0.000841544	0.00106218	0.000952585	0.00108711	0.000664331	0.000838714	0.000666689	0.00127086	0.000675218	0.00124624	0.000801383	0.00116017	0.000814874	0.000984379	0.00106852	0.000770905	0.00115354	0.00077147	0.000519826
G114	0.00116334	0.0011869	0.00103018	0.00129704	0.00133618	0.00102884	0.000974856	0.00106372	0.00106304	0.00104516	0.00100384	0.00099593	0.0010422	0.0011704	0.0011441	0.00102693	0.00104335	0.00107037	0.00110955	0.000941576	0.00114867	0.0014152	0.00123667	0.00128823	0.00101949	0.000930308	0.00111656	0.00100176	0.000940131	0.000968043	0.000947126	0.00138931	0.00119949	0.00105417	0.000898236	0.00102471	0.00100945	0.00146065	0.00113392	0.00119122	0.00134273	0.00127181	0.000977801	0.000993455	0.00118079	0.00117973	0.00105357	0.000977917	0.00111041
G115	0.00200147	0.00190701	0.00226179	0.00199698	0.0027614	0.00253467	0.00209762	0.0024954	0.00202855	0.00228783	0.00157739	0.0024452	0.00237906	0.00239057	0.00278049	0.00191333	0.00186752	0.0022359	0.00213344	0.00255659	0.00208631	0.00273285	0.00210225	0.00222745	0.00235991	0.00196263	0.00188165	0.00217696	0.00202834	0.00205682	0.00249823	0.00256057	0.00209707	0.00264994	0.00212716	0.00190216	0.00204484	0.00239204	0.00179174	0.00207406	0.00260319	0.00295391	0.00322426	0.00264759	0.00181543	0.00192066	0.00197736	0.00195029	0.00210595
G116	0.000821404	0.00094001	0.000970049	0.00100376	0.00131429	0.000799022	0.000790219	0.000966232	0.000803281	0.00109541	0.000940417	0.000728934	0.00057335	0.00108675	0.00121914	0.00109128	0.000933763	0.000977769	0.000693065	0.000953185	0.00100022	0.0011065	0.000824838	0.000984517	0.000891054	0.000791831	0.000981162	0.00087161	0.000931369	0.00075921	0.000960154	0.0013544	0.00105178	0.000995743	0.000817437	0.000876737	0.000733236	0.00106461	0.000915316	0.000926884	0.000982584	0.00107762	0.000770791	0.000913937	0.00116309	0.000772146	0.000988844	0.000954648	0.000941948
G117	0.0271753	0.0362964	0.0406199	0.0358166	0.0494804	0.0511689	0.0227557	0.050862	0.0438359	0.0364946	0.0175191	0.0206298	0.0330598	0.0442287	0.0506109	0.0282143	0.0392796	0.0434515	0.0403069	0.0416459	0.0473104	0.0649981	0.0407027	0.052763	0.0371837	0.0292676	0.0294063	0.0484272	0.0448247	0.0208895	0.0381345	0.0281849	0.0252437	0.0356867	0.0234869	0.029786	0.0305861	0.0646105	0.0274591	0.0356684	0.0504347	0.0664628	0.0936746	0.036298	0.0361095	0.0215002	0.0228547	0.0302085	0.0645075
G118	0.00266601	0.00296873	0.00214893	0.00232251	0.00384274	0.00284074	0.00172916	0.00275271	0.00258524	0.00225075	0.00275965	0.00225138	0.00244655	0.00298285	0.00219045	0.00295572	0.00274776	0.00252181	0.00285594	0.00227796	0.00329382	0.00357927	0.00256048	0.00219835	0.00270598	0.00227582	0.00208948	0.0028415	0.00260028	0.00249899	0.00229901	0.00350654	0.00275822	0.00257219	0.00211408	0.00294139	0.00250873	0.00414836	0.00275145	0.00289814	0.00280121	0.00280149	0.00222352	0.00240453	0.00305274	0.00287566	0.0030744	0.00249937	0.00272435
G119	0.00328259	0.0033115	0.00363494	0.00311211	0.00278181	0.00304271	0.00328306	0.00423344	0.00294051	0.00301432	0.00312374	0.00274683	0.00334361	0.00319889	0.00300896	0.00436403	0.00300464	0.00260709	0.0038048	0.00234797	0.00330771	0.00292082	0.00323352	0.00308133	0.00381397	0.00286303	0.00263213	0.00390613	0.00272885	0.00272556	0.00324552	0.00359858	0.00290131	0.00257358	0.00254051	0.00320952	0.0035127	0.00348372	0.00297733	0.00334499	0.00268074	0.00355747	0.00357401	0.00329502	0.00331521	0.00342575	0.00302125	0.00274813	0.00385146
G120	0.00822304	0.0077505	0.00862076	0.00668366	0.0166709	0.00738263	0.0238424	0.00899147	0.00941191	0.0114713	0.00878557	0.0105165	0.0103393	0.00602284	0.00606967	0.00824834	0.0100198	0.00935071	0.00830251	0.007346	0.00870834	0.00649252	0.00968007	0.00745071	0.00858482	0.0101904	0.0165146	0.00963875	0.00941672	0.00798461	0.0110164	0.00455318	0.0079014	0.00515089	0.0062603	0.0105848	0.00669089	0.0083535	0.00591109	0.0225848	0.00925104	0.00688935	0.00578266	0.00778193	0.0091489	0.00773803	0.00781888	0.00856666	0.00826286
G121	0.00133748	0.0012797	0.00236645	0.00259018	0.00287844	0.00158017	0.00183884	0.00178601	0.00148068	0.00227812	0.00225647	0.00140834	0.00204051	0.00228784	0.00227491	0.00229481	0.00246564	0.00172719	0.0015364	0.00139942	0.00258269	0.00280395	0.0015224	0.00252553	0.00279384	0.00203399	0.00140616	0.00166502	0.00214785	0.00156973	0.00219522	0.00273834	0.00225306	0.00231703	0.00133955	0.00215003	0.00168888	0.00254655	0.00236195	0.00240861	0.00206169	0.00214157	0.00330333	0.00183541	0.00234185	0.00159354	0.00219311	0.00202869	0.00214827
G122	0.000725184	0.000771171	0.000767089	0.000724615	0.00083722	0.000591603	0.000838951	0.000756774	0.000600423	0.000752739	0.000709294	0.000511488	0.00065653	0.00071841	0.0007674	0.000760203	0.000857072	0.000643831	0.000675904	0.00075325	0.00089134	0.000776703	0.000845079	0.000713115	0.000970105	0.000786662	0.000643215	0.000832622	0.000720333	0.000655861	0.000617258	0.000748306	0.000718026	0.00074679	0.000731031	0.00074679	0.000608367	0.000857763	0.000752971	0.000755522	0.000687343	0.000898877	0.000693965	0.000715408	0.000781732	0.000953837	0.000681339	0.000728605	0.000782149
G123	0.00042004	0.000575696	0.000547215	0.000540532	0.000731887	0.00079586	0.000406295	0.000533689	0.000610787	0.000345946	0.000543275	0.000517446	0.000431578	0.000660276	0.000788176	0.000414277	0.000712709	0.000508407	0.000516212	0.000559683	0.0005675	0.000561576	0.000584495	0.000582704	0.000644495	0.000501102	0.000553264	0.000523465	0.00048711	0.000452582	0.000699634	0.000521408	0.000621903	0.000576498	0.000478323	0.000587785	0.000570227	0.000709095	0.000512618	0.000658809	0.000497005	0.000533954	0.000397153	0.000456388	0.00064741	0.000602999	0.00060401	0.000580653	0.000560763
G124	0.00056079	0.000596064	0.000597967	0.000653361	0.000642697	0.000550855	0.000545917	0.000608919	0.000596487	0.000707259	0.000574866	0.000532003	0.000576592	0.000577144	0.00058755	0.000627457	0.000657563	0.000596592	0.000663931	0.000551418	0.000642705	0.000695547	0.000634851	0.00070616	0.00058131	0.000571804	0.000551227	0.000617144	0.000522215	0.000626753	0.000583327	0.000612503	0.000653199	0.000629488	0.000598308	0.000518951	0.000578308	0.00064152	0.000591268	0.000611551	0.000705945	0.000616578	0.000571776	0.000556688	0.00069851	0.000593112	0.000670564	0.000535931	0.000625641
G125	0.000654951	0.000748464	0.000591085	0.00108217	0.000542879	0.000848604	0.000658567	0.00067092	0.000840683	0.000766326	0.000673145	0.000670538	0.000719621	0.000647545	0.00076314	0.000426732	0.000905451	0.000602446	0.00076987	0.00134922	0.000743288	0.000643082	0.00124889	0.000659364	0.000751248	0.00067696	0.00108154	0.000686267	0.000744664	0.000744593	0.000712449	0.000682973	0.00066149	0.000629809	0.000896805	0.000673975	0.000656223	0.000678203	0.000825988	0.000752051	0.0005482	0.000675773	0.000899754	0.000551648	0.000848978	0.000959323	0.00126404	0.000631033	0.000965443
G126	0.00215321	0.00236716	0.00246013	0.00273373	0.0030084	0.0022061	0.00239461	0.00237734	0.00227362	0.00239357	0.00218534	0.00211331	0.00211668	0.00283698	0.00251637	0.00225212	0.00248337	0.00185223	0.00212444	0.00213897	0.00265664	0.00321808	0.00239608	0.0028349	0.00288704	0.00222722	0.00247865	0.00243566	0.00250532	0.0019186	0.00211123	0.00280835	0.00250766	0.00289876	0.00197563	0.00194108	0.00208097	0.00251142	0.00241897	0.00278382	0.00248286	0.00306531	0.00270782	0.00221981	0.00254082	0.00197941	0.00269491	0.00218888	0.00228806
G127	0.000468752	0.000473562	0.000607384	0.000632102	0.000598815	0.000598109	0.000529434	0.000503817	0.000513054	0.000771315	0.000528091	0.000613752	0.000599188	0.000573959	0.000557669	0.000484333	0.000509488	0.000532705	0.000506088	0.000538652	0.000539734	0.000516052	0.000562188	0.000502422	0.00065742	0.00049592	0.000532405	0.000573686	0.000507823	0.000478349	0.00045884	0.000560499	0.000501536	0.000625388	0.00050789	0.000477946	0.000466982	0.000570159	0.000856012	0.000562147	0.000728776	0.000508668	0.000546706	0.000506169	0.000516133	0.000538599	0.00062499	0.000525395	0.00064546
G128	0.00141476	0.00140949	0.00143139	0.00189028	0.00155591	0.00131423	0.00143917	0.00140442	0.0013096	0.0014602	0.00135371	0.00140855	0.00137032	0.00142332	0.00168691	0.00144979	0.00141339	0.00185343	0.0013521	0.00144313	0.00142491	0.00138911	0.00193696	0.00145898	0.00215505	0.00128235	0.00154982	0.0014238	0.00133706	0.00108735	0.00117621	0.0017564	0.00146239	0.00174318	0.00143311	0.00134388	0.0013284	0.00139869	0.00174167	0.00137748	0.00215491	0.00147228	0.00182041	0.0014027	0.0015927	0.00151897	0.00201953	0.00145459	0.00232471
G129	0.00098776	0.000955386	0.00119577	0.00103532	0.00147906	0.0010429	0.00089515	0.000964161	0.00101216	0.00112284	0.00105733	0.000728498	0.000743414	0.00112567	0.000989709	0.00101815	0.000903584	0.000994348	0.00124029	0.000920171	0.00110997	0.00109582	0.00137137	0.00123088	0.00129937	0.00108588	0.00116667	0.00105357	0.000969463	0.000885004	0.000941948	0.00110458	0.00094658	0.00115919	0.00116249	0.0011389	0.00104587	0.00116693	0.000998946	0.00127882	0.00112742	0.00124858	0.00123391	0.00106264	0.000995846	0.000904449	0.001047	0.00112415	0.00141561
G130	0.00148589	0.00144231	0.000882101	0.000836233	0.00134872	0.00299282	0.00130428	0.00125059	0.000642229	0.000961492	0.00116826	0.00256471	0.000989378	0.00108431	0.00120566	0.00133913	0.000990426	0.00129929	0.000865719	0.0033729	0.00108595	0.00171501	0.000945078	0.000836564	0.000814148	0.0010377	0.00105976	0.000968673	0.00115578	0.00156737	0.000709327	0.00124853	0.000918646	0.000955566	0.00277893	0.00103396	0.000929577	0.000892465	0.00079937	0.000858224	0.00105339	0.00101398	0.00075473	0.00175647	0.00107465	0.000782712	0.00266013	0.0014598	0.00103063
G131	0.00224662	0.00230908	0.00277989	0.00413808	0.00371926	0.00209473	0.00302629	0.00307006	0.00301789	0.00263911	0.00320608	0.00263228	0.00296482	0.00222717	0.00314639	0.00376214	0.00361759	0.00254995	0.00232921	0.00348652	0.00352767	0.00404092	0.00390826	0.00362695	0.002883	0.00341794	0.00263638	0.00254869	0.0034069	0.00233229	0.00279984	0.00512617	0.00426906	0.0041018	0.00292164	0.00302029	0.00250166	0.00406799	0.00219285	0.00414448	0.00413171	0.00364365	0.00345185	0.00279838	0.00348164	0.00228809	0.00305117	0.00313842	0.0029247
G132	0.00115343	0.000918712	0.00097851	0.00100083	0.00101579	0.00117752	0.00095757	0.000876512	0.00076645	0.0011076	0.00105722	0.000838235	0.000880054	0.00073398	0.0033617	0.00117743	0.000725141	0.000876422	0.000562028	0.000680807	0.00090917	0.000984112	0.000573331	0.000929109	0.00071701	0.000697407	0.000790415	0.000704941	0.000860651	0.00223566	0.000919267	0.000862473	0.000822791	0.000932385	0.000756112	0.00102029	0.00109886	0.00100704	0.0013449	0.00108	0.00104739	0.00151434	0.000725495	0.000928575	0.000829442	0.00088043	0.000714486	0.00073362	0.00100807
G133	0.000663461	0.000846762	0.000737274	0.000835133	0.0009575	0.000735552	0.000760548	0.000902747	0.000783977	0.0007635	0.000864645	0.000790183	0.000984559	0.000719202	0.00077603	0.000695424	0.000878939	0.000937046	0.000852409	0.000786455	0.000862768	0.00108678	0.000854123	0.000965151	0.00094384	0.000826225	0.00072683	0.000989622	0.000696526	0.000811255	0.000806536	0.00107112	0.00091057	0.00073558	0.000752123	0.000827354	0.000774695	0.000966587	0.000744671	0.00109556	0.000839251	0.00081906	0.000762041	0.00100791	0.000978183	0.000711458	0.000741667	0.00073633	0.00101243
G134	0.00141723	0.00119327	0.00122874	0.00188959	0.00151943	0.00122194	0.00117052	0.00135767	0.00111266	0.00135173	0.00123012	0.00125284	0.00163552	0.00138445	0.00128775	0.00145938	0.00143116	0.00128857	0.00127036	0.00125645	0.00141916	0.00160106	0.00187105	0.00147544	0.00131936	0.00118471	0.00129339	0.00137876	0.00126449	0.00119042	0.00103196	0.00155743	0.00133583	0.00180828	0.00122347	0.00131327	0.00118901	0.00180179	0.00196766	0.00183477	0.00157938	0.00211476	0.00130632	0.00135916	0.00132868	0.00128788	0.00158441	0.00104801	0.00134281
G135	0.000335715	0.000332983	0.000350499	0.000374057	0.000351621	0.000340749	0.000432075	0.000256168	0.000403405	0.000346054	0.000326215	0.000306623	0.00031264	0.00034836	0.00035014	0.000335254	0.000378747	0.000322201	0.000365897	0.0003679	0.000293647	0.00036025	0.000358968	0.00033963	0.00039471	0.000374403	0.000382249	0.00031621	0.000349061	0.000382816	0.000331108	0.000301204	0.000319695	0.00034062	0.00036229	0.000339049	0.000306385	0.000297402	0.000339507	0.000394594	0.000317411	0.00033167	0.000326979	0.000407434	0.000306517	0.000324284	0.000306291	0.000319513	0.00032573
G136	0.000800021	0.000838114	0.000681188	0.000825128	0.000854763	0.000941105	0.000699387	0.000728955	0.000812674	0.000919238	0.000824544	0.000721575	0.000770285	0.000764423	0.000760441	0.000714627	0.000881962	0.000665684	0.000821472	0.000739643	0.000968957	0.000722699	0.000807285	0.000813996	0.00082637	0.000712081	0.000695969	0.0007493	0.000686971	0.000725562	0.000717518	0.00082685	0.000713416	0.000768241	0.000875525	0.000764423	0.000726283	0.000805656	0.000859447	0.000722883	0.00085981	0.000956397	0.000679912	0.000681019	0.000795957	0.000906695	0.000709683	0.000788861	0.000804889
G137	0.00345811	0.00408436	0.00386972	0.00417335	0.00537413	0.00289752	0.00340949	0.00445936	0.00320741	0.00322745	0.00315341	0.00411773	0.00431869	0.00356433	0.00293434	0.00407784	0.0037375	0.00366801	0.00291798	0.00326557	0.00405995	0.00379848	0.00459023	0.00448838	0.00295852	0.0032471	0.00349874	0.00422007	0.00347227	0.0027	0.00323523	0.00491958	0.00341277	0.00347357	0.00305678	0.00345073	0.0023922	0.00509488	0.00271985	0.00477525	0.00437872	0.00493903	0.00331793	0.00476726	0.00424307	0.00339143	0.00431754	0.00346632	0.00361531
G138	0.00217248	0.00222592	0.00231845	0.00304881	0.00299116	0.00198557	0.00159353	0.00217097	0.00227873	0.00197739	0.00231599	0.0022026	0.00233102	0.00221882	0.00232541	0.00233053	0.00291882	0.00186882	0.00205832	0.00172356	0.00240129	0.00257646	0.00241101	0.00264688	0.00158856	0.00229807	0.00197918	0.00165843	0.0024643	0.00175123	0.00192521	0.00337853	0.00260397	0.00263224	0.0019605	0.00211166	0.00187307	0.00236124	0.00224333	0.00207377	0.00197947	0.00242528	0.00217213	0.00205178	0.00249706	0.00209929	0.00252654	0.00232458	0.00244657
G139	0.000651355	0.000630432	0.000657201	0.00077855	0.000643881	0.000525266	0.000638475	0.000739929	0.000633211	0.000636783	0.0006342	0.000620339	0.000545699	0.000842925	0.000664345	0.000721056	0.000652212	0.00061934	0.00071643	0.000661121	0.000667217	0.000617153	0.000606067	0.000645103	0.00081324	0.00066951	0.000584077	0.000677064	0.000633864	0.000614928	0.00054733	0.000851294	0.000603519	0.000669071	0.000571805	0.000650007	0.000592139	0.000616684	0.00082714	0.000694456	0.000629491	0.000686477	0.000774664	0.000651523	0.000684558	0.000739871	0.000764868	0.000631984	0.000627797
G140	0.00772293	0.0101524	0.00910795	0.0100671	0.00714223	0.00832577	0.0123568	0.00943828	0.0109865	0.00897735	0.0130849	0.0100815	0.0111085	0.0155744	0.00732832	0.0099106	0.0124768	0.0130964	0.0100217	0.00910726	0.0133652	0.0082844	0.0100463	0.0115903	0.0107039	0.0121779	0.0140316	0.013039	0.0148595	0.0112419	0.010988	0.00916827	0.0108261	0.0079718	0.0151129	0.011618	0.0117052	0.00966392	0.00966468	0.00860974	0.0126204	0.00525834	0.0107836	0.0102346	0.011401	0.0106062	0.0134985	0.0115467	0.00861916
G141	0.000762739	0.000834088	0.00106204	0.000903798	0.00101579	0.00106704	0.000838089	0.000902747	0.000549177	0.000905675	0.00105831	0.000762891	0.000753178	0.00103411	0.00103922	0.00101374	0.000935749	0.000609103	0.00067915	0.000743961	0.00106378	0.00122672	0.000773177	0.000823987	0.000986084	0.000951345	0.000668984	0.00084104	0.00101493	0.000703759	0.000923129	0.00106884	0.00109136	0.00120871	0.000855425	0.000887839	0.000835456	0.00128246	0.00119843	0.000995143	0.00106944	0.00102597	0.00106586	0.000987926	0.0010781	0.000627509	0.000993515	0.000982643	0.0010456
G142	0.0050485	0.00422838	0.0046341	0.00376375	0.00509848	0.00467809	0.00442578	0.00456562	0.00388329	0.00474714	0.00415768	0.00457369	0.00471069	0.00459561	0.0053031	0.0045249	0.00410306	0.00428233	0.00420232	0.00444494	0.00427589	0.00450738	0.00412451	0.00423568	0.00476968	0.00423334	0.00410275	0.00498295	0.0038687	0.00449591	0.00436191	0.00591771	0.00478718	0.00423015	0.00429274	0.00398787	0.00423569	0.00427896	0.00426389	0.00335587	0.00543153	0.00469225	0.0047207	0.00445335	0.00384067	0.0041828	0.00364208	0.00386934	0.00451573
G143	0.00355729	0.00569919	0.00373646	0.0043462	0.00416886	0.00372793	0.00442475	0.0039648	0.00470651	0.00316503	0.00379848	0.00324013	0.00495368	0.00678994	0.00449191	0.0029825	0.00373946	0.00467675	0.00403453	0.0040933	0.00337068	0.00495095	0.00357527	0.00334401	0.00380477	0.00428088	0.00408923	0.00378447	0.00420647	0.00415937	0.00339845	0.00345534	0.00489604	0.00190055	0.00700332	0.0039479	0.00500362	0.00285943	0.00345587	0.00285782	0.00360285	0.0040081	0.00388962	0.00487498	0.00344743	0.00572898	0.00469792	0.00408051	0.00423144
G144	0.000861573	0.000861799	0.000933566	0.00101498	0.000979071	0.000875857	0.000860681	0.000946539	0.000863462	0.000930122	0.000835258	0.00087874	0.000919075	0.000854948	0.00100916	0.000914624	0.000870702	0.000834739	0.000893034	0.0008503	0.000998421	0.000967719	0.000945896	0.00094056	0.00103699	0.000940085	0.000908342	0.000907572	0.000893976	0.000843482	0.000900571	0.00108117	0.000898556	0.00102598	0.00087339	0.000828636	0.000855067	0.00109531	0.000940696	0.000977972	0.00100642	0.00114733	0.000861457	0.00085173	0.000942724	0.000882864	0.000957225	0.000903865	0.00101406
G145	0.00261904	0.00271022	0.00260024	0.00268144	0.00337276	0.00239935	0.00204401	0.00328936	0.00200341	0.00253643	0.00208067	0.00256695	0.00238308	0.00243524	0.00287374	0.0021598	0.00215503	0.00208027	0.0019052	0.0027235	0.00259395	0.0026505	0.00241061	0.00228528	0.00335947	0.00259061	0.0023032	0.00244004	0.00242765	0.00208497	0.00264374	0.00324154	0.00275487	0.00345275	0.00220081	0.0020246	0.00206299	0.00313453	0.00254109	0.00271879	0.00257246	0.00323954	0.00309678	0.00243699	0.00233919	0.00256254	0.00201317	0.00241669	0.00222732
G146	0.0126596	0.0141933	0.0130761	0.0135903	0.0104527	0.0144346	0.0141643	0.0104447	0.0173848	0.0102724	0.0153408	0.0117055	0.0113445	0.0132504	0.012168	0.0121882	0.0155571	0.013514	0.0135522	0.0171097	0.013695	0.0132834	0.0138032	0.0138106	0.0116785	0.0158912	0.012908	0.0127254	0.0150056	0.0144512	0.0136155	0.0104519	0.0161181	0.0105891	0.0169982	0.0134631	0.0131988	0.0111456	0.0144323	0.0135801	0.0106758	0.0102141	0.012201	0.0110118	0.0150261	0.0158558	0.0135146	0.0162109	0.011153
G147	0.00273238	0.00260844	0.00243961	0.00264822	0.00338133	0.00257937	0.00261382	0.0025768	0.00244577	0.00335313	0.00240569	0.00233167	0.00290746	0.00264544	0.00297463	0.002569	0.00253069	0.00251046	0.0023837	0.00247884	0.00277008	0.00260151	0.0026307	0.00282643	0.00313864	0.00247175	0.00317172	0.00277214	0.00244692	0.00232752	0.00214326	0.00327836	0.00271823	0.00301318	0.00236696	0.00245511	0.00227302	0.00317908	0.00342237	0.00300117	0.00340581	0.00286177	0.00284325	0.00236797	0.00263836	0.00245559	0.00287092	0.00250667	0.00269926
G148	0.00109932	0.00117219	0.00113167	0.00126565	0.00166092	0.00115102	0.00103581	0.00118362	0.00109367	0.00119719	0.00108322	0.00097778	0.00129159	0.000988779	0.00117961	0.00119118	0.00121992	0.00111058	0.00102137	0.00115414	0.00128833	0.00153553	0.00110935	0.00126638	0.0011702	0.00107648	0.00119305	0.00129643	0.00108143	0.000985744	0.00111884	0.00172863	0.00105635	0.00112258	0.000906258	0.00111918	0.00116738	0.00134948	0.00107559	0.00149409	0.0011964	0.00141011	0.000825949	0.000953987	0.00122795	0.0011486	0.00119634	0.00111021	0.00119321
G149	0.0120799	0.0136276	0.0119105	0.0110272	0.0126675	0.0146724	0.0150214	0.0109859	0.013312	0.0111936	0.0142593	0.0144158	0.0123525	0.0132483	0.0104319	0.0132357	0.0133944	0.0125055	0.0128512	0.0161623	0.0121082	0.0122866	0.0103323	0.0125251	0.0115158	0.0153759	0.0153233	0.012004	0.0129037	0.0136066	0.0119578	0.0112273	0.0130694	0.00901258	0.0164323	0.0135705	0.0143384	0.0121035	0.0101564	0.0132742	0.0122152	0.0139316	0.0087434	0.0119537	0.0136315	0.0131339	0.0138556	0.0159568	0.00907404
G150	0.00206968	0.00215155	0.00194827	0.00243066	0.00245052	0.0019887	0.00209198	0.00238273	0.00208572	0.00254042	0.00207168	0.00212183	0.00219043	0.00222404	0.00211003	0.00200492	0.00220462	0.00203414	0.00201194	0.00219614	0.00230878	0.00256624	0.00229012	0.00260542	0.00260277	0.00211316	0.00208482	0.00217299	0.00195926	0.00216122	0.00178919	0.00246218	0.0021432	0.00247526	0.00182294	0.00199539	0.00172918	0.00256577	0.00266879	0.00206634	0.00243791	0.00232821	0.00247542	0.00226377	0.00228006	0.00208662	0.00224389	0.00206526	0.00236338
G151	0.00283419	0.00266159	0.00275102	0.00348996	0.00358515	0.00262134	0.00270486	0.00258267	0.00281781	0.00286764	0.00231812	0.00230348	0.00316754	0.00251675	0.00224937	0.00255131	0.00268636	0.00230609	0.00267043	0.00261911	0.00281703	0.00313284	0.00287065	0.0033033	0.00277225	0.00261773	0.00272506	0.00272696	0.00254026	0.0028317	0.00234995	0.00413713	0.0024209	0.00359176	0.00262505	0.00246835	0.00225496	0.00285105	0.00381031	0.00270182	0.00245473	0.00288627	0.00308072	0.00270452	0.00272196	0.00249394	0.00328171	0.00256399	0.00366148
G152	0.000837011	0.00133714	0.00058962	0.00143374	0.000793357	0.000920265	0.00140768	0.000940114	0.00111101	0.00177023	0.000842132	0.00080615	0.000775202	0.000650943	0.00136997	0.00100801	0.00193467	0.000773715	0.00145416	0.00101695	0.00114078	0.00107825	0.00132178	0.000847731	0.000840276	0.00182772	0.0134229	0.00271405	0.00113418	0.00115843	0.00130455	0.000656727	0.000817916	0.000699218	0.00135516	0.000935849	0.00108906	0.000761646	0.000932965	0.00376329	0.000791963	0.000775686	0.000723926	0.000799953	0.00208106	0.00109141	0.000981918	0.00214475	0.000899988
G153	0.000612689	0.000824594	0.000672091	0.000752954	0.00091974	0.000778225	0.000572843	0.000693047	0.000638306	0.00080331	0.000720865	0.000693364	0.000558574	0.000568481	0.00065187	0.000666865	0.000642901	0.000648461	0.000771418	0.000514073	0.000709305	0.000798571	0.000681581	0.000797155	0.000661008	0.000630347	0.000836165	0.000654038	0.000584839	0.000655005	0.000756968	0.00111178	0.000757597	0.00063096	0.00058973	0.000712	0.000702839	0.00104834	0.000923097	0.000795384	0.000780679	0.00121051	0.000860989	0.000662667	0.000711289	0.000599421	0.000778835	0.000596676	0.000611815
G154	0.00293473	0.00300063	0.00340265	0.00364835	0.00343688	0.00269514	0.00220369	0.00233307	0.00212304	0.00234766	0.00284609	0.00265287	0.0021582	0.00240316	0.00315574	0.00323214	0.00270001	0.00243796	0.00305675	0.00262693	0.00341182	0.00285095	0.00232841	0.00376079	0.00238498	0.00232278	0.00210259	0.00242333	0.00269865	0.00257275	0.0026889	0.00340577	0.00268281	0.00288401	0.00227489	0.00263133	0.00270684	0.00328546	0.003799	0.00320604	0.00335612	0.00353318	0.00226333	0.00219771	0.00284366	0.00302191	0.00270739	0.00252374	0.00340079
G155	0.0447182	0.0388924	0.0538601	0.0411713	0.348032	0.0538437	0.475373	0.0517715	0.109594	0.0539517	0.0457625	0.0623491	0.0999861	0.0498968	0.0468989	0.0512971	0.0668709	0.0924798	0.0606353	0.0464402	0.0832395	0.0712761	0.101035	0.0504005	0.101552	0.047845	0.271974	0.0526126	0.0851424	0.0625543	0.121532	0.045076	0.0855447	0.0508208	0.0423656	0.0600939	0.0482476	0.0352555	0.0349601	0.325248	0.0924945	0.0376294	0.0670696	0.0401733	0.0634178	0.0602165	0.0302853	0.0449043	0.0768704
G156	0.00141753	0.00146859	0.00145335	0.00217676	0.00163014	0.0014035	0.00153535	0.00146642	0.00143682	0.00179282	0.00142012	0.00143539	0.0013727	0.00165226	0.00168382	0.00140804	0.00165485	0.00133109	0.00142002	0.00150104	0.00169745	0.00145208	0.00162724	0.00157773	0.00166819	0.00145056	0.00133868	0.0013877	0.00143448	0.0013273	0.00127583	0.00178969	0.00154953	0.0020445	0.00135688	0.00139514	0.00134531	0.00175053	0.0019348	0.00158926	0.00171769	0.00164895	0.00160708	0.00150005	0.00161301	0.00137291	0.00174543	0.00146629	0.0016075
G157	0.0022806	0.00246912	0.00262729	0.00301556	0.00310454	0.00209292	0.0021065	0.00247157	0.00219764	0.00241132	0.00236531	0.00213253	0.0018016	0.00242222	0.00284352	0.00245378	0.00231629	0.00227712	0.00230216	0.00200705	0.00283387	0.00289843	0.0022452	0.00251059	0.00307126	0.00207677	0.00254084	0.00224548	0.00237272	0.00202008	0.00247243	0.00282236	0.00239597	0.0029273	0.00200538	0.00236914	0.00209168	0.00280553	0.0026689	0.00248017	0.00211947	0.00297668	0.00225593	0.00235924	0.00265243	0.00234995	0.00267649	0.00225159	0.00300375
G158	0.000770285	0.000616267	0.000756729	0.000859111	0.000897631	0.00069182	0.000680561	0.000795382	0.00064578	0.000694081	0.000927215	0.000791146	0.00064526	0.000699662	0.000779791	0.000715335	0.000923123	0.00075789	0.000659131	0.000657178	0.000939266	0.00086864	0.000803644	0.000881825	0.000756734	0.000728347	0.00066318	0.000710803	0.000683636	0.000948311	0.000735519	0.000706751	0.000774954	0.000897984	0.000646397	0.000862932	0.000798056	0.00109967	0.000620368	0.000788212	0.00109545	0.000789986	0.000542779	0.000754412	0.000918557	0.00067192	0.000766466	0.00067596	0.000723246
G159	0.00120209	0.00198142	0.00182256	0.00107553	0.000875253	0.00148921	0.00145003	0.00120217	0.00192834	0.00137259	0.00228118	0.00127424	0.00108327	0.00278835	0.00166273	0.000934328	0.00132086	0.00146904	0.00171908	0.00123546	0.00152762	0.00160028	0.0010028	0.00194381	0.00180786	0.00266632	0.00215291	0.00179249	0.00191784	0.00180716	0.00225398	0.00143491	0.00148174	0.00138681	0.00323309	0.00146914	0.00145724	0.00126516	0.00111042	0.00120197	0.00188615	0.00127748	0.00102389	0.00133535	0.00147713	0.00229848	0.00176826	0.00255057	0.00124461
G160	0.0111013	0.015047	0.0154276	0.0274944	0.0107106	0.0157198	0.0148877	0.0169159	0.0206596	0.0330649	0.0180201	0.0142977	0.0254421	0.0243318	0.0117182	0.0121338	0.0179532	0.0162164	0.0167796	0.0112728	0.020138	0.0159486	0.0218341	0.017626	0.0210333	0.0178553	0.0228003	0.0230602	0.0203235	0.0118118	0.0124437	0.0142262	0.0171324	0.0178438	0.0169989	0.0168179	0.010022	0.0174175	0.0203889	0.0155737	0.0214961	0.0131866	0.017364	0.0167167	0.0179088	0.0212309	0.0285857	0.0178001	0.0179428
G161	0.00115471	0.0015038	0.00128562	0.00144108	0.00142126	0.00095317	0.00111618	0.00199933	0.00120358	0.00180131	0.00142453	0.00139116	0.00136951	0.00117333	0.00138481	0.00149365	0.00204415	0.00124385	0.00126619	0.00114868	0.0018306	0.00128621	0.00159214	0.0018322	0.00162155	0.00147689	0.00135962	0.00132314	0.00167159	0.00112932	0.00116277	0.00171222	0.0017817	0.00144628	0.00154787	0.00153303	0.00116936	0.00175386	0.00146069	0.0017649	0.00123574	0.00153777	0.00113335	0.00145907	0.00160575	0.00149199	0.00181306	0.00148784	0.00167043
G162	0.00680712	0.00983051	0.00613636	0.00221586	0.00287048	0.00630936	0.00392584	0.00363765	0.0159751	0.00220061	0.00581118	0.00499531	0.00353504	0.00542064	0.00523396	0.00557105	0.00447089	0.00725688	0.0131168	0.00574992	0.005703	0.00699862	0.00373286	0.00692492	0.00381715	0.00621052	0.00731297	0.00634364	0.00669923	0.00517992	0.00800221	0.00570481	0.00595811	0.00491536	0.00928145	0.00499336	0.00539292	0.00453846	0.00528059	0.00425732	0.00547091	0.00520237	0.00553584	0.00620682	0.00491565	0.00879685	0.00865736	0.00578481	0.00596249
G163	0.00309862	0.0032591	0.00340064	0.0046399	0.00374457	0.00277129	0.00286409	0.00372522	0.00272095	0.00378477	0.00330454	0.00297791	0.00293919	0.00335349	0.00336857	0.00306398	0.00385955	0.00275612	0.00334098	0.00270088	0.00409973	0.00381272	0.0037752	0.00392206	0.00304693	0.00359959	0.0030204	0.00354472	0.00335522	0.0030236	0.00292115	0.00411951	0.00335778	0.00422314	0.0025041	0.00323648	0.00295279	0.00425441	0.00379372	0.00400947	0.00375801	0.00370705	0.00405846	0.0033124	0.00383052	0.0029117	0.0030049	0.00324406	0.00352303
G164	0.0147728	0.0146256	0.0118231	0.0185319	0.00971163	0.0152335	0.0163834	0.0187361	0.0151701	0.0243049	0.0131814	0.0161151	0.0188265	0.0152223	0.0240232	0.0176997	0.0183944	0.0182444	0.0146008	0.0164137	0.0155827	0.0141841	0.0219518	0.0188969	0.0196541	0.0169932	0.0194217	0.0206804	0.0178391	0.0158608	0.0107197	0.0112649	0.0152735	0.0165948	0.0163668	0.0118798	0.0116778	0.0118719	0.0178528	0.0172305	0.0233676	0.0104171	0.0202897	0.0172291	0.0153882	0.019829	0.0153361	0.016602	0.0179247
G165	0.000717003	0.000655102	0.00092249	0.000883084	0.00100162	0.000857458	0.000660486	0.000772207	0.00078281	0.000877716	0.000799907	0.000827367	0.000724688	0.000838049	0.000777234	0.000737117	0.000765536	0.000719549	0.000636392	0.000690748	0.000870701	0.000931075	0.00067269	0.000821327	0.000734946	0.000725693	0.000781892	0.000717422	0.000792761	0.00058507	0.000760826	0.000916078	0.000770238	0.000902166	0.000613178	0.00067241	0.000735041	0.000893742	0.000962352	0.000829164	0.00087063	0.000733822	0.000659811	0.000790484	0.000802221	0.000747269	0.000843513	0.000759057	0.000790167
G166	0.00966298	0.00886693	0.00827	0.00355334	0.00817242	0.00955328	0.00856736	0.00835398	0.00693723	0.00556223	0.0114572	0.00876771	0.00583955	0.00546623	0.00820657	0.00981136	0.00966767	0.00855091	0.00770771	0.00839007	0.00783057	0.00677455	0.00597707	0.00818455	0.00464648	0.00988156	0.0081641	0.00616153	0.00973864	0.00955418	0.00818893	0.0046748	0.00740941	0.00461766	0.0101966	0.00942947	0.00894114	0.00569345	0.00391867	0.00970257	0.00486492	0.00329679	0.00418613	0.00815311	0.0100201	0.00536753	0.00977031	0.0108235	0.00584046
G167	0.00338002	0.00394327	0.0032587	0.00376034	0.00365577	0.00319941	0.00376178	0.003796	0.00385536	0.00329448	0.00336946	0.00343348	0.00355232	0.00374989	0.00386647	0.00313601	0.00367144	0.00370762	0.00332695	0.00340454	0.0036597	0.00350631	0.00372404	0.00350953	0.00344567	0.00327181	0.00327572	0.0042398	0.00360473	0.00333747	0.00346572	0.00371651	0.00374047	0.00372357	0.0038503	0.00296866	0.00278328	0.00361281	0.00354696	0.00316414	0.0035053	0.00305286	0.00347989	0.00291182	0.0035472	0.00608648	0.00336438	0.00350377	0.0032558
G168	0.0061409	0.00648105	0.00898975	0.00800827	0.0475363	0.0070543	0.0796275	0.00653218	0.0175332	0.0155597	0.00909946	0.00724326	0.0161511	0.00416614	0.00335544	0.0051259	0.00933339	0.0150693	0.0102611	0.00871373	0.0112986	0.00786832	0.0128105	0.00723807	0.0178927	0.00551413	0.0494465	0.00789073	0.0108275	0.00791256	0.0326353	0.00361336	0.0108906	0.00718631	0.00466267	0.00999577	0.0110551	0.00562195	0.00640462	0.0695002	0.0148448	0.00556576	0.0112104	0.00879562	0.00840893	0.00811477	0.00571895	0.0055986	0.011903
G169	0.010637	0.00998413	0.0129539	0.0210534	0.117745	0.0147055	0.124729	0.0120575	0.0275599	0.0225951	0.0134819	0.0129955	0.0244441	0.0181913	0.00583432	0.0109579	0.0138588	0.0213958	0.0235886	0.025359	0.0249248	0.0146187	0.0263551	0.0135614	0.0266343	0.0106678	0.0828676	0.0130772	0.0256114	0.0217252	0.0308089	0.00887997	0.0206136	0.00897824	0.0112612	0.0184981	0.0159353	0.0127423	0.00849878	0.132626	0.0277452	0.00949816	0.0217555	0.0210374	0.0135399	0.0226799	0.0133371	0.0108573	0.017833
G170	0.00370194	0.00425606	0.00352356	0.00470413	0.0041207	0.00376963	0.00357612	0.00378512	0.00360668	0.00361076	0.0034475	0.00326994	0.00296566	0.00347599	0.00367963	0.00354945	0.00314271	0.00351236	0.00405009	0.00307939	0.003631	0.00435183	0.00401645	0.0033668	0.00450819	0.00326316	0.00369141	0.00364347	0.00290469	0.00276269	0.00345952	0.00430048	0.00353972	0.00349363	0.00317436	0.00374978	0.00353811	0.00498073	0.00335313	0.00325928	0.0035073	0.00500595	0.00307654	0.00314743	0.00361511	0.00381045	0.00369777	0.00336779	0.00446823
G171	0.000821551	0.000899433	0.000951545	0.000955271	0.00101529	0.000892062	0.000732194	0.000881773	0.000875452	0.0010036	0.000899929	0.000924372	0.000845853	0.00107833	0.000848781	0.000893863	0.000847716	0.000879356	0.000833483	0.000672525	0.00105094	0.00102544	0.000729555	0.000964543	0.000830662	0.000842199	0.000853232	0.000865447	0.000820579	0.000868034	0.000884183	0.00100977	0.000953937	0.00105848	0.000777547	0.000905282	0.000795478	0.00124417	0.000983455	0.000977768	0.000931838	0.00105409	0.000826806	0.000931462	0.00104072	0.000945911	0.00104243	0.000835976	0.000944874
G172	0.00139596	0.00126395	0.00193203	0.00214796	0.00197955	0.00146388	0.00171231	0.0019082	0.00148872	0.00187276	0.00173154	0.00153477	0.00150528	0.00158607	0.00171937	0.00181106	0.00191481	0.00169471	0.00120158	0.00149032	0.00181456	0.00180831	0.00161515	0.00224775	0.00188233	0.00172573	0.00130851	0.00164267	0.00184154	0.00113466	0.00152822	0.00227389	0.00191504	0.00238194	0.00125453	0.00156102	0.00142665	0.00207475	0.00169356	0.00205742	0.00186801	0.00180363	0.00211591	0.00168825	0.00215853	0.00151712	0.0017782	0.00156258	0.00206957
G173	0.0193433	0.019704	0.0214262	0.0216001	0.015883	0.0202249	0.0220907	0.0182973	0.0219758	0.0228778	0.020594	0.0201967	0.0188569	0.020079	0.0154493	0.019195	0.0206674	0.0220945	0.0216804	0.022488	0.017879	0.0169135	0.0212132	0.0187755	0.0175157	0.0201073	0.0201212	0.0214455	0.0195435	0.0214399	0.0195619	0.014622	0.0221347	0.0182469	0.0203169	0.0183074	0.0204165	0.018493	0.0206263	0.0191252	0.0201914	0.0187403	0.0176897	0.0200732	0.0199869	0.0238646	0.0204444	0.019555	0.0177597
G174	0.000910068	0.00107529	0.00110221	0.00142834	0.00133144	0.00113341	0.000984804	0.0010251	0.00113111	0.00110692	0.000993351	0.000839794	0.00125657	0.0010419	0.00116269	0.00113041	0.00115776	0.00104871	0.00120743	0.00122981	0.00113594	0.00165864	0.00117554	0.00112757	0.00128484	0.000963209	0.00137187	0.00103301	0.000959274	0.000907157	0.0010404	0.00122704	0.00111568	0.000916783	0.0010548	0.000956576	0.000990249	0.0012677	0.000934175	0.000911967	0.00108102	0.00140679	0.00126335	0.00127666	0.00127728	0.00112059	0.00120413	0.00085806	0.00128014
G175	0.000555268	0.000578374	0.000634365	0.00068596	0.000708707	0.000573045	0.000559469	0.000583718	0.000554281	0.000623004	0.000571721	0.000554679	0.000603421	0.000628012	0.000608599	0.000642047	0.000593054	0.000577553	0.000599542	0.000552755	0.000684268	0.000654751	0.000632229	0.000683762	0.000661998	0.000584127	0.000574483	0.000595895	0.000566106	0.000541138	0.000573772	0.000661263	0.000636005	0.000674439	0.00054213	0.000547607	0.000511369	0.000682164	0.000673151	0.000719837	0.000659862	0.000656649	0.000601522	0.000619473	0.000643087	0.000557856	0.000582412	0.00060933	0.000644036
G176	0.000966981	0.00109068	0.00102882	0.0013208	0.00137788	0.00106711	0.00108665	0.00104681	0.00100179	0.00108536	0.00114605	0.000993711	0.00103887	0.00119887	0.00107792	0.00108419	0.00129332	0.000920329	0.000997012	0.00096622	0.00115726	0.00119669	0.000913796	0.00123534	0.00116492	0.00102837	0.0011264	0.00097078	0.00103582	0.001093	0.00110105	0.00132778	0.00101412	0.00110646	0.00107167	0.00109623	0.00112477	0.00119124	0.00115086	0.00121154	0.00110172	0.001298	0.00108992	0.00102119	0.00109457	0.00101709	0.00135672	0.000947385	0.00113587
G177	0.000590385	0.000616533	0.000702434	0.000886401	0.000828736	0.000699188	0.000597481	0.000586953	0.000649189	0.000728595	0.000601176	0.00064497	0.000769226	0.000663075	0.000642616	0.000674506	0.000693603	0.000627522	0.000652986	0.000694372	0.000724354	0.000772493	0.00070629	0.000671449	0.000737787	0.00066525	0.000661339	0.000656933	0.000646272	0.000622428	0.000656453	0.000826401	0.000662923	0.000748276	0.000612254	0.000675549	0.000606407	0.000677518	0.000650584	0.000685581	0.000745025	0.000817368	0.000709937	0.000651455	0.000686545	0.000668526	0.000735828	0.000627732	0.000687755
G178	0.00486379	0.00783013	0.00531964	0.00511461	0.0012068	0.00918301	0.0055112	0.005322	0.00674584	0.00618147	0.00885096	0.00430592	0.00435256	0.00827955	0.00857555	0.00463377	0.00415817	0.0100262	0.00781359	0.00449558	0.00550558	0.00260408	0.00396975	0.00262889	0.00409109	0.0078404	0.00821393	0.0103671	0.00614327	0.00763464	0.00366404	0.00213314	0.00500797	0.00570164	0.007686	0.00574967	0.00558984	0.00343631	0.0149052	0.00196418	0.010262	0.00346347	0.00833097	0.00856423	0.00380954	0.00730287	0.00829688	0.00691867	0.00878422
G179	0.00119654	0.00136875	0.00129454	0.00199519	0.00184822	0.00139972	0.00145496	0.00131744	0.00125997	0.00225814	0.0013037	0.00184541	0.00152975	0.00162795	0.00137407	0.00137685	0.00161074	0.00176019	0.00134358	0.00146481	0.00156672	0.00120859	0.00141309	0.00149038	0.00181053	0.00132877	0.00133724	0.00140174	0.00133246	0.001316	0.0011352	0.0015322	0.00147949	0.00203716	0.00152608	0.00134871	0.00132653	0.00144603	0.00159089	0.00168083	0.0014886	0.00150171	0.00152962	0.00116329	0.00150433	0.00126506	0.00133158	0.00134439	0.00173383
G180	0.00351354	0.00339978	0.00325354	0.0048027	0.00823587	0.00320379	0.00800358	0.00460024	0.00394386	0.00492617	0.00312338	0.00357217	0.00542216	0.00345709	0.00389948	0.00379738	0.00405632	0.00435329	0.00343417	0.00312193	0.00353817	0.00396384	0.00544883	0.00378293	0.00454737	0.00315712	0.00743271	0.00410769	0.00361506	0.00325918	0.00402093	0.00331065	0.00428033	0.00398259	0.00301086	0.00296441	0.00303703	0.0033447	0.00360594	0.00733948	0.00470773	0.00370693	0.00391729	0.00346142	0.00396596	0.00496581	0.00305458	0.00317579	0.00440192
G181	0.00146302	0.00209976	0.00172418	0.0025778	0.00213035	0.00237967	0.0017365	0.00203317	0.00221576	0.00219694	0.00193808	0.00184169	0.00154021	0.00213818	0.0021	0.00219936	0.00200439	0.00187009	0.00212281	0.00171713	0.00223553	0.00206654	0.00215983	0.0020696	0.00295261	0.00200205	0.00207681	0.00178685	0.00191858	0.00201426	0.00187484	0.00293303	0.0021173	0.00236614	0.00186641	0.0021172	0.00142565	0.00224602	0.00224987	0.00258609	0.00216214	0.00280542	0.00190328	0.0026322	0.00224652	0.00197254	0.0019662	0.00186576	0.00202284
G182	0.0227948	0.0271738	0.0219623	0.0210415	0.0154251	0.036793	0.025289	0.0329471	0.0155215	0.0360265	0.03275	0.0293621	0.0238666	0.0326951	0.0382065	0.0401216	0.0285398	0.0377141	0.0232166	0.0302203	0.0298791	0.0305719	0.0324771	0.0280264	0.0310255	0.0294309	0.026397	0.0328909	0.0305817	0.0313668	0.0217371	0.0282866	0.0260564	0.0272231	0.0243702	0.0272766	0.0279638	0.0250593	0.0305306	0.0302025	0.0302178	0.0193522	0.0335309	0.0385783	0.0298138	0.0255226	0.0371111	0.0277759	0.03682
G183	0.00334087	0.00351426	0.00327372	0.00361357	0.00370811	0.00367934	0.00334719	0.0037593	0.00322896	0.00428856	0.00333532	0.00350332	0.00385431	0.00371383	0.00384809	0.00371805	0.0029641	0.00363072	0.00299484	0.00350602	0.0034066	0.00379237	0.0032469	0.00334516	0.00386795	0.00372651	0.00361068	0.00365252	0.00310002	0.00361523	0.0035402	0.00457238	0.00320668	0.00317113	0.00332219	0.0030597	0.00296603	0.0031001	0.00329191	0.00333147	0.00379405	0.0038452	0.00370834	0.00334946	0.00314974	0.00366707	0.00345912	0.00328669	0.00328318
G184	0.000560696	0.000545044	0.000566275	0.000735546	0.000565023	0.000484207	0.000555621	0.000573528	0.000606343	0.000505953	0.000514048	0.000563739	0.000544674	0.000604021	0.000591436	0.000561607	0.000571904	0.000617391	0.000571535	0.000578085	0.000625218	0.000583424	0.000616768	0.000664379	0.000669015	0.00056411	0.000560002	0.000617483	0.000591097	0.000515	0.000553997	0.000572763	0.000666321	0.000720608	0.000492028	0.00051322	0.000502439	0.000638237	0.000669118	0.000637148	0.000575464	0.000613575	0.000608744	0.000637609	0.000600597	0.000441421	0.000606455	0.000543792	0.000592412
G185	0.00119644	0.000987679	0.00124009	0.00135996	0.00123285	0.00112886	0.0011317	0.00156152	0.000976401	0.00192803	0.00121232	0.00138865	0.00136549	0.00132481	0.00173316	0.00140931	0.0013039	0.00140616	0.00118935	0.00113913	0.00130987	0.00121269	0.001176	0.00135891	0.00147621	0.00123786	0.00114579	0.00125035	0.001426	0.00108783	0.00114431	0.0015374	0.00129043	0.00153329	0.000978453	0.00120114	0.00117534	0.00152292	0.00154299	0.00127016	0.00132321	0.0010902	0.00173425	0.0014791	0.00126977	0.00112336	0.00130555	0.00122509	0.00154134
G186	0.00309379	0.0031847	0.00289942	0.00335189	0.00349351	0.00376626	0.00274769	0.00341694	0.00285137	0.00306448	0.00279224	0.00290883	0.00314756	0.00390058	0.00385755	0.00275564	0.00313832	0.00331036	0.00296808	0.00310994	0.00336207	0.00272193	0.00266834	0.00351566	0.00300418	0.00330966	0.00296449	0.00325677	0.0031136	0.00326678	0.00284718	0.00369104	0.00316164	0.00398939	0.00376827	0.00269761	0.00282834	0.00308102	0.00405433	0.00323896	0.00329789	0.00336026	0.00309867	0.0034832	0.00358371	0.00334115	0.00288276	0.00298803	0.00368735
G187	0.00361717	0.00522191	0.00438858	0.00642953	0.00545017	0.00664693	0.0107869	0.00963162	0.00515981	0.00881838	0.00695991	0.00694565	0.00702054	0.00623965	0.00741828	0.0058971	0.0111571	0.00635191	0.00459756	0.00626318	0.00813301	0.0070938	0.00812531	0.00800718	0.0067534	0.00717462	0.0103675	0.00636727	0.00850819	0.00651365	0.00410249	0.00397447	0.00774483	0.00486892	0.0127463	0.00583627	0.00517362	0.00644957	0.00661545	0.00791411	0.0065437	0.00364823	0.00521321	0.00624125	0.00974202	0.00544089	0.0122963	0.00703165	0.00676361
G188	0.00282915	0.00266786	0.00258243	0.00318188	0.00318588	0.00289687	0.00245945	0.00298837	0.00249635	0.0029668	0.00261372	0.00236963	0.00287221	0.0030687	0.00341861	0.00308613	0.00279161	0.00270899	0.00277075	0.00258881	0.00365632	0.00331358	0.00297402	0.00334978	0.00301761	0.00263551	0.00260021	0.00293233	0.0027444	0.00281342	0.00263963	0.00355898	0.00288939	0.00275982	0.00262568	0.00258556	0.00242764	0.00370699	0.00315612	0.00288574	0.00282012	0.00293051	0.00251924	0.00280299	0.00314355	0.00294495	0.00332031	0.00271118	0.00281721
G189	0.0049174	0.00750584	0.00872912	0.00721525	0.00403	0.00723507	0.00581242	0.00512674	0.0105992	0.00400392	0.00723936	0.00533974	0.00652976	0.00412088	0.0101488	0.00520935	0.00630182	0.00847788	0.00662237	0.00576815	0.00837987	0.00505249	0.00427867	0.00676959	0.00665329	0.0117517	0.012021	0.00496916	0.0093094	0.0067859	0.00835753	0.00256496	0.00744469	0.00455747	0.0146124	0.00865116	0.00635914	0.00471578	0.00599281	0.00961566	0.00576093	0.00468014	0.0063054	0.00426585	0.00588101	0.00895148	0.00712728	0.0130946	0.00618597
G190	0.000637987	0.000729462	0.000628469	0.000740174	0.000664456	0.000696716	0.000682202	0.000575388	0.000577153	0.000796981	0.000663039	0.000807755	0.000671046	0.000693726	0.000616192	0.000650269	0.000597506	0.000739824	0.000734975	0.000588348	0.000684379	0.000639642	0.000695871	0.000619435	0.000860473	0.000573743	0.000722486	0.000775316	0.000583848	0.000653567	0.000600454	0.000764957	0.000571856	0.000780266	0.000629571	0.000604869	0.000587905	0.00068408	0.000705837	0.000711084	0.000818572	0.000754793	0.00077531	0.000666102	0.000647427	0.000639027	0.000932983	0.000623849	0.000741729
G191	0.00054282	0.000654246	0.000475787	0.000763909	0.000789521	0.000608109	0.000555169	0.000583853	0.000609371	0.000805535	0.00056873	0.000515931	0.000618418	0.000563586	0.000601366	0.000519596	0.000483892	0.000571047	0.000568532	0.00073588	0.000692035	0.000579737	0.000566455	0.000593222	0.000575927	0.00058437	0.00057418	0.000642344	0.000560767	0.000573344	0.000586382	0.000767776	0.000511191	0.000645662	0.000555368	0.000530717	0.000580198	0.000594546	0.00088982	0.000590728	0.000605493	0.000665982	0.000628695	0.000544153	0.00061185	0.000752596	0.000564098	0.000556054	0.000640364
G192	0.0683925	0.0760568	0.0676649	0.0661494	0.0752232	0.0782911	0.0944708	0.0695022	0.0773895	0.0700924	0.0644973	0.0602131	0.0679031	0.073348	0.0671133	0.0636031	0.0618875	0.0658274	0.0730031	0.0795117	0.0762913	0.0574986	0.0656083	0.0697589	0.0814462	0.0692852	0.0850457	0.0716456	0.0746172	0.0769904	0.0718888	0.0603661	0.0676673	0.0698286	0.0726654	0.0713186	0.0643401	0.055739	0.0856277	0.0948007	0.0774571	0.0505397	0.0827207	0.0545719	0.058669	0.0739596	0.0615261	0.0673187	0.0824528
G193	0.00418338	0.00294839	0.00409355	0.00518943	0.00471131	0.00349107	0.00435949	0.00436904	0.00375797	0.0039298	0.0038403	0.00434897	0.0047892	0.00444132	0.00583101	0.00458261	0.00464375	0.00375085	0.00315891	0.00377973	0.00484412	0.00401027	0.00397084	0.00472336	0.00477666	0.00422272	0.00358713	0.00424601	0.00465571	0.00359727	0.00396548	0.0053063	0.00454156	0.00513999	0.00348163	0.0041488	0.0041009	0.00544153	0.00465895	0.00455628	0.00399526	0.00533364	0.00529579	0.00399881	0.00495386	0.00375419	0.00364388	0.00405407	0.00362777
G194	0.00916019	0.0154136	0.0111248	0.0120961	0.012552	0.0121331	0.0116129	0.010657	0.0129849	0.00843175	0.0142137	0.00979433	0.0107726	0.00853181	0.0093105	0.0112169	0.0133693	0.0101822	0.0122243	0.0173354	0.012934	0.0116375	0.00991943	0.0117363	0.0091007	0.0137181	0.0143075	0.0121007	0.0156725	0.0147958	0.0119509	0.00989799	0.0115333	0.00815749	0.0147887	0.0135957	0.0113412	0.0092617	0.00911714	0.013645	0.00897453	0.0108762	0.0085225	0.00791102	0.0137255	0.0119612	0.012824	0.0137403	0.00845722
G195	0.00143031	0.00130843	0.00174456	0.00151918	0.00159567	0.00126042	0.00126691	0.00151925	0.00142507	0.00148127	0.00141505	0.00160595	0.00138859	0.00139169	0.00154457	0.00175336	0.00122916	0.00134861	0.00130297	0.00130271	0.00172783	0.00149815	0.00136668	0.00156446	0.00135276	0.00155402	0.00136158	0.00144192	0.00142249	0.00124967	0.00138992	0.00155708	0.0014863	0.00170197	0.001512	0.00129995	0.00131266	0.00187502	0.00158433	0.00156911	0.00180912	0.00171026	0.0011569	0.00152107	0.00168452	0.00135579	0.00165929	0.00161122	0.0014955
G196	0.000587881	0.000573288	0.000752014	0.000737666	0.000834829	0.000570128	0.000649009	0.000707509	0.000473721	0.00073833	0.000649587	0.000651507	0.000565487	0.000566455	0.000735362	0.000799373	0.000736401	0.000552988	0.00054894	0.0007023	0.000687824	0.000538714	0.000889309	0.000664338	0.000797522	0.000681487	0.000693439	0.000556982	0.000747542	0.00056286	0.000805773	0.000701565	0.000680077	0.000786482	0.000676175	0.000686214	0.000755656	0.000748102	0.000804708	0.000754759	0.000852311	0.000616985	0.000775745	0.000596515	0.000729128	0.000640186	0.000690477	0.000718763	0.000691581
G197	0.000477606	0.000519823	0.000715034	0.000739933	0.000659431	0.000611591	0.000598917	0.000764597	0.000679619	0.000625405	0.000636139	0.000574485	0.000676403	0.000563957	0.000726662	0.000637155	0.000682162	0.000557534	0.0005951	0.000567068	0.000835184	0.000866735	0.000799972	0.000643722	0.000617102	0.000608492	0.000635778	0.000620475	0.000810101	0.000678426	0.000569555	0.000908436	0.000609018	0.000750747	0.000510737	0.000609186	0.000624383	0.000767141	0.000707515	0.000743514	0.000659715	0.000693987	0.00050552	0.000687201	0.00081816	0.000556238	0.000659417	0.000774584	0.000609053
G198	0.000922155	0.000740164	0.0003824	0.000648759	0.00108902	0.000629911	0.000546826	0.000638475	0.000746716	0.000498857	0.000626034	0.00107873	0.000502275	0.00050291	0.000516807	0.000532995	0.000396077	0.000390404	0.00049997	0.00106042	0.000745964	0.000461313	0.000393272	0.000561575	0.000489479	0.000385607	0.000421635	0.0004929	0.000807193	0.000889727	0.00066358	0.000824106	0.000501397	0.000375997	0.00181327	0.000779911	0.000624768	0.000387685	0.0010583	0.000683502	0.000528635	0.000820027	0.000824038	0.000440439	0.000367961	0.000550986	0.000565347	0.000469167	0.000491545
G199	0.00100321	0.00188174	0.000780854	0.0012825	0.00165581	0.00154644	0.00249273	0.000825824	0.00156025	0.00169443	0.00117801	0.000962166	0.00170328	0.00124288	0.00105431	0.000810957	0.00143882	0.00198613	0.00170528	0.00166761	0.00140809	0.00106111	0.00151298	0.00150337	0.00101089	0.00149393	0.00182557	0.00151004	0.00176189	0.001766	0.00131454	0.000748198	0.00163435	0.000984611	0.00132406	0.001515	0.00123039	0.000605444	0.000838825	0.00179501	0.000919124	0.000521194	0.000616956	0.0016036	0.00131582	0.00149661	0.00108822	0.00149079	0.00128485
G200	0.00133141	0.00133284	0.00130983	0.00215578	0.00154531	0.00129916	0.00132613	0.00173077	0.00119192	0.00171118	0.00131358	0.00106101	0.00118132	0.00162383	0.00153996	0.00138992	0.00178189	0.00114007	0.0011909	0.00134539	0.00151473	0.00215334	0.00147732	0.00141962	0.00184113	0.0012712	0.00128548	0.00143369	0.00163999	0.00104509	0.001303	0.00158968	0.00172479	0.00209844	0.00125777	0.00158665	0.00117133	0.00189143	0.00132387	0.00181865	0.001453	0.00184488	0.00129562	0.00136642	0.00167245	0.0011167	0.00206575	0.00152332	0.00184263
G201	0.00129447	0.00186259	0.00200895	0.00202709	0.00219866	0.00163972	0.00147887	0.00185732	0.00192456	0.00174436	0.00174032	0.00125586	0.00135816	0.00189789	0.00206299	0.00174457	0.00179944	0.00155655	0.00149891	0.0014389	0.00191911	0.0018736	0.00167949	0.00229406	0.00210602	0.00201644	0.00166402	0.00231803	0.00154205	0.00162127	0.0019051	0.00190511	0.0021266	0.00188859	0.0016374	0.00178002	0.00176629	0.00209091	0.00133045	0.0018578	0.0017324	0.00174447	0.00154055	0.00181278	0.00213559	0.00154552	0.00177447	0.00172385	0.00184722
G202	0.00117042	0.00115528	0.00190677	0.000994281	0.00137535	0.000976221	0.000930666	0.00171375	0.00112287	0.000883711	0.00155645	0.00115706	0.000974156	0.00133269	0.00174107	0.0022226	0.00215205	0.00129667	0.00105176	0.000852911	0.00182894	0.00133063	0.00111935	0.00207717	0.000733852	0.00139809	0.00077616	0.00129687	0.00172319	0.000981209	0.00166476	0.00167354	0.00155258	0.00133288	0.000932521	0.00159698	0.00185941	0.00322847	0.00136599	0.00128578	0.00095443	0.00125837	0.00136127	0.00150017	0.00220942	0.00131702	0.00156324	0.00150863	0.0013004
G203	0.00787287	0.0066049	0.0142466	0.00715705	0.237849	0.0104917	0.262999	0.0112718	0.0267493	0.0221693	0.00854315	0.0125473	0.0465976	0.00762546	0.00363501	0.0100827	0.0163124	0.0228882	0.0127602	0.0255729	0.0306492	0.0154793	0.0233103	0.00979651	0.047484	0.0068254	0.207497	0.0107995	0.0335001	0.0163425	0.0910802	0.00523103	0.0200753	0.00578723	0.0059066	0.0200553	0.0257872	0.00850237	0.00505642	0.251928	0.026938	0.0041789	0.0202062	0.00764504	0.0154952	0.0164497	0.00965057	0.00710692	0.0147223
G204	0.00248258	0.0029947	0.00314693	0.00299475	0.00411228	0.00306801	0.00221438	0.0032805	0.00248927	0.00287814	0.00240847	0.00397221	0.00314349	0.00313591	0.00386333	0.00321932	0.00275972	0.0033143	0.00233823	0.00285069	0.0032212	0.00364208	0.00279873	0.00274853	0.00354465	0.00271226	0.00266216	0.0033172	0.00284059	0.00297894	0.00298798	0.00394162	0.00295158	0.00243519	0.00228743	0.00239203	0.00315254	0.0039377	0.00240244	0.00305012	0.00259969	0.00353172	0.00350264	0.00276022	0.00284797	0.00276022	0.00268074	0.00296597	0.00283356
G205	0.0104223	0.00988944	0.0098006	0.0104949	0.0751227	0.00961168	0.0377442	0.0134332	0.00999505	0.0243198	0.0101648	0.0129452	0.0287206	0.00779682	0.00430108	0.0104773	0.010736	0.0145271	0.0119091	0.0146207	0.0138565	0.0104967	0.0119765	0.012599	0.0180042	0.00994366	0.03802	0.0106698	0.014991	0.0117953	0.0223078	0.00691944	0.0151879	0.00879522	0.00706933	0.0114512	0.00990006	0.0139854	0.006856	0.0728323	0.0150951	0.0106705	0.0108096	0.0155002	0.00920103	0.00831192	0.0141945	0.0107522	0.0137222
G206	0.0156223	0.0160616	0.0140738	0.0108608	0.0170062	0.0151534	0.00944803	0.0166383	0.0146498	0.0129089	0.0108258	0.0131052	0.0164865	0.016725	0.0196787	0.0159242	0.0131919	0.0157527	0.0124936	0.0135778	0.0138752	0.0200566	0.0134294	0.0144292	0.0158257	0.0134335	0.0117397	0.0147534	0.014662	0.0144235	0.0139744	0.0198996	0.0131424	0.0143171	0.0141671	0.0144395	0.0129009	0.0186099	0.012686	0.0126832	0.0156744	0.019558	0.0188978	0.0161441	0.0132367	0.0114246	0.0130801	0.0134277	0.0137475
G207	0.00269552	0.00260886	0.0030884	0.00380338	0.00347015	0.00241281	0.00262504	0.00292423	0.00236319	0.0031822	0.0025046	0.00251851	0.00302614	0.00290471	0.00340968	0.00324628	0.00313743	0.00258431	0.00264979	0.00250304	0.00323881	0.00280721	0.00316356	0.00317561	0.0032216	0.00262084	0.00243271	0.0028952	0.00298467	0.00254456	0.00241062	0.00342958	0.00299774	0.00354487	0.00251863	0.00261962	0.00252188	0.0035217	0.00336062	0.00336811	0.00281681	0.00379379	0.00282466	0.00288757	0.0031955	0.00271586	0.00295414	0.00281477	0.00291202
G208	0.000691238	0.000670318	0.000709792	0.000755462	0.000824229	0.000730724	0.000763104	0.000666233	0.000667684	0.000731538	0.000667226	0.000694844	0.000757629	0.000729596	0.000704284	0.000665057	0.000678853	0.000696694	0.000625918	0.000632477	0.00072854	0.000736203	0.000875786	0.000684286	0.000959619	0.000704768	0.000791928	0.000709743	0.000661974	0.000638569	0.000691846	0.000783076	0.000673863	0.000931292	0.000695939	0.000689285	0.000641136	0.000731988	0.000876652	0.000692515	0.000823172	0.000749467	0.000712225	0.000667658	0.000708163	0.000684294	0.000774096	0.000690908	0.00083327
G209	0.00178564	0.00239722	0.0020965	0.00275995	0.0026456	0.00228482	0.00199041	0.00255929	0.00202452	0.00199261	0.00188692	0.00230378	0.00187151	0.00222947	0.0019225	0.00212024	0.00216629	0.00192641	0.00246498	0.00206823	0.00238355	0.00310818	0.00214914	0.00267405	0.00235093	0.00212992	0.00233735	0.00194264	0.00208344	0.00187734	0.00201319	0.00296012	0.00222393	0.00214914	0.00244696	0.0022189	0.00212477	0.00268827	0.00245295	0.00258972	0.00205395	0.00264122	0.00199638	0.00182596	0.00238462	0.00197639	0.00242185	0.00217364	0.00245926
G210	0.00543575	0.0046119	0.0039552	0.0245411	0.071589	0.00625841	0.0521739	0.011262	0.00833561	0.023128	0.00533027	0.00888562	0.0245131	0.00526652	0.00407725	0.00369549	0.00901962	0.00650594	0.00572588	0.011715	0.00466311	0.00483588	0.0151658	0.00550497	0.0211676	0.00450969	0.0366827	0.00628327	0.00579941	0.00849234	0.0102821	0.0033327	0.0110833	0.00511737	0.00350538	0.00651746	0.00555228	0.00707431	0.00227714	0.0803929	0.0118471	0.0049319	0.00607706	0.00480681	0.00760005	0.00532035	0.00820745	0.00480598	0.00648689
G211	0.00668789	0.00845413	0.0110276	0.00435453	0.00734864	0.0090446	0.00439963	0.0064846	0.0126008	0.00561903	0.00633779	0.00525214	0.00615741	0.00726151	0.00504209	0.00866935	0.0077454	0.00962276	0.00938763	0.00857658	0.00903563	0.00962512	0.00703603	0.00781103	0.00374472	0.00605515	0.00521062	0.00682773	0.0088719	0.00821881	0.0107444	0.00373559	0.00669051	0.00262971	0.00656199	0.00998779	0.0090254	0.00990381	0.00291192	0.00705017	0.00695747	0.00672292	0.0104979	0.00768529	0.00766675	0.00503098	0.00597877	0.00599404	0.00858713
G212	0.0843056	0.0847514	0.082586	0.118446	0.159807	0.0768145	0.147485	0.0972904	0.101969	0.0821009	0.076404	0.0870345	0.121724	0.108194	0.101804	0.1031	0.0997051	0.0984518	0.076839	0.0817976	0.0961268	0.0963429	0.119171	0.107473	0.109191	0.0869489	0.183012	0.097742	0.103985	0.0757464	0.0947922	0.0828492	0.101361	0.0967437	0.0868357	0.0748202	0.0768837	0.0938546	0.0760321	0.17117	0.0941766	0.0718122	0.0975071	0.0828969	0.0970352	0.12417	0.0846	0.0843786	0.094925
G213	0.00155754	0.00206794	0.00180288	0.00250475	0.00210308	0.00137518	0.002291	0.00216616	0.00168178	0.00174579	0.00211105	0.00183092	0.00189879	0.00209133	0.00199681	0.00195123	0.00205461	0.00132315	0.00154489	0.00187837	0.00266001	0.00168269	0.0017919	0.0023853	0.00237361	0.00204337	0.00132566	0.0020185	0.00204387	0.00162304	0.00200176	0.00239253	0.0019851	0.00275541	0.00167701	0.00178098	0.00149178	0.00270666	0.00232248	0.00221057	0.00197228	0.00270245	0.00197164	0.00217076	0.00237076	0.00166025	0.00237103	0.00208217	0.00230669
G214	0.00248221	0.00247728	0.0022347	0.00196169	0.0204715	0.00324292	0.0190424	0.0022472	0.0028383	0.00376613	0.00263057	0.00186082	0.00407075	0.00297997	0.0028988	0.00222738	0.00319678	0.00502471	0.00288221	0.00370674	0.00334918	0.00317479	0.0035404	0.00310035	0.00483559	0.00203295	0.0148935	0.00282372	0.00383049	0.00207654	0.00757669	0.00246638	0.00282514	0.00187315	0.00138327	0.00326934	0.00246424	0.0023239	0.00200386	0.0266045	0.00343752	0.00239225	0.00194284	0.00189491	0.00308007	0.00209137	0.00224979	0.00235482	0.00336961
G215	0.000758121	0.000902092	0.000841207	0.00112684	0.000995051	0.000671677	0.000650589	0.00086111	0.000820525	0.000895151	0.000794152	0.000812668	0.000857172	0.00083956	0.000890185	0.000791125	0.000877975	0.000912877	0.000825244	0.000888838	0.000982658	0.000958714	0.000852978	0.000945125	0.000749432	0.000850601	0.00079952	0.000757166	0.000781361	0.00070675	0.000726143	0.00106184	0.000825669	0.00103127	0.000830533	0.000734629	0.000861589	0.000966405	0.000961219	0.00115101	0.000913748	0.00115951	0.000772833	0.000764085	0.000924145	0.000731976	0.000865433	0.000794672	0.00094229
G216	0.000747761	0.000586068	0.000647638	0.000786741	0.000989557	0.000749388	0.000679858	0.000703709	0.00063634	0.000633548	0.000656693	0.000667096	0.000811339	0.000805886	0.000719774	0.000707738	0.000820939	0.000621452	0.000674724	0.000738445	0.000824	0.000815402	0.000727518	0.000872682	0.000607785	0.00075974	0.000632488	0.000621126	0.000703582	0.000687671	0.000658142	0.000837912	0.000709108	0.000793903	0.000561246	0.000680526	0.000593391	0.000776296	0.00081921	0.000823043	0.000792131	0.000902444	0.000648073	0.00071269	0.000836907	0.000659102	0.000729295	0.000672673	0.000693885
G217	0.000431011	0.0005853	0.00051104	0.000503633	0.000491046	0.000761357	0.000465859	0.000503279	0.000548628	0.000666474	0.000761984	0.000830289	0.000609549	0.00044603	0.000556964	0.000452822	0.000546058	0.000532274	0.000617676	0.000514536	0.000634299	0.000976786	0.000415972	0.000631127	0.000665032	0.000618564	0.000618602	0.000459925	0.00055188	0.00129273	0.000631572	0.000897182	0.000534476	0.000528588	0.00165671	0.000592337	0.000569839	0.000457439	0.000507287	0.000551131	0.000536097	0.000622778	0.000619807	0.000498647	0.000477856	0.000423555	0.000596296	0.000679375	0.000536383
G218	0.00948323	0.00829892	0.0083986	0.00777142	0.00900961	0.0140212	0.0155572	0.0199821	0.00835907	0.0100921	0.00886228	0.0221784	0.0204997	0.0100347	0.0114441	0.0114189	0.0098184	0.0186615	0.00889544	0.00840764	0.00940554	0.00887553	0.00787442	0.00963972	0.0108094	0.010079	0.00924685	0.00979471	0.010068	0.0088076	0.0126427	0.00998245	0.0107564	0.0277228	0.0154098	0.0107565	0.01699	0.01018	0.0107062	0.00763246	0.0127891	0.0106658	0.0111457	0.0220138	0.00904359	0.0104166	0.0104911	0.00997588	0.0164914
G219	0.00125633	0.00131491	0.00113238	0.00109036	0.00115167	0.00121693	0.00131001	0.00214179	0.00122501	0.00136843	0.00132251	0.00181959	0.00180317	0.00171844	0.00133425	0.00104883	0.00155029	0.000902901	0.00111046	0.00136257	0.00107291	0.00206653	0.00112736	0.00173487	0.00160695	0.00154097	0.00144326	0.00126078	0.001124	0.00145946	0.00127898	0.00286818	0.00110867	0.000912893	0.00154415	0.00116123	0.00149869	0.00112151	0.00100867	0.00148534	0.00163874	0.0012814	0.00137882	0.00148302	0.00100766	0.00092584	0.00104554	0.00128506	0.00143775
G220	0.00528888	0.0055395	0.00472447	0.00493836	0.00370731	0.00452085	0.00462525	0.00433924	0.00557491	0.00484502	0.00459918	0.00503024	0.00578724	0.00601336	0.00485527	0.00479395	0.00492643	0.00585689	0.00459515	0.00461345	0.00425804	0.00347151	0.00499192	0.0044786	0.00524687	0.00454432	0.0056388	0.00610456	0.00467799	0.00484424	0.00372916	0.00413724	0.00542025	0.00418498	0.00543659	0.00363081	0.00384563	0.00448401	0.00505353	0.00343066	0.00561656	0.00415055	0.00499676	0.00479738	0.00423255	0.00655603	0.00502829	0.00478461	0.00447201
G221	0.00250589	0.00214224	0.00159331	0.00184488	0.0115406	0.0016184	0.00960178	0.00203611	0.00226256	0.00232971	0.00186363	0.00150587	0.00304257	0.00164899	0.0015782	0.00210794	0.00206438	0.00274917	0.00214668	0.00275099	0.00208648	0.00197993	0.0025558	0.0018922	0.00279018	0.00167976	0.00946702	0.00204543	0.00215241	0.00186005	0.00346851	0.00149666	0.00205827	0.00184034	0.00112977	0.00176485	0.00193169	0.00156173	0.000953606	0.0129278	0.00212637	0.00140803	0.0020486	0.00248298	0.00204494	0.00186086	0.00151469	0.00152487	0.00215121
G222	0.0171615	0.0108017	0.00841348	0.0278972	0.00957449	0.0100957	0.0113657	0.0200375	0.0145183	0.0177815	0.0116188	0.00564346	0.009783	0.0121694	0.0435375	0.0190706	0.0230501	0.0134283	0.00817313	0.0116	0.0172131	0.0105372	0.0240251	0.0249656	0.0114289	0.0177362	0.0183684	0.0126369	0.0215241	0.00791227	0.00745209	0.00856993	0.0100964	0.0137309	0.0160961	0.00833391	0.0074402	0.0115691	0.0247064	0.0150677	0.00920507	0.0113913	0.0181138	0.00636057	0.0216413	0.036462	0.0091961	0.0176117	0.0173054
G223	0.00391518	0.00258605	0.00226107	0.00202589	0.00300427	0.00221558	0.00331847	0.00314784	0.00174945	0.00281083	0.00251453	0.00281242	0.00283961	0.00232254	0.00315104	0.00288799	0.00201175	0.00241835	0.00267502	0.00188853	0.00224251	0.00246804	0.00199782	0.00257975	0.00430038	0.00266159	0.0025787	0.00296967	0.00236562	0.00232026	0.00305021	0.00386888	0.0021038	0.00267763	0.00243175	0.00186827	0.00243433	0.00227545	0.00276701	0.00133676	0.0028016	0.00342119	0.00559047	0.0025254	0.00219511	0.00246364	0.00149643	0.0024557	0.00185612
G224	0.000532217	0.000540745	0.00041515	0.000569144	0.000489433	0.000487879	0.000541826	0.000475726	0.000537275	0.000563681	0.000427866	0.000421977	0.000563682	0.000535841	0.000419342	0.000490369	0.000603555	0.000388147	0.000475416	0.000566708	0.000515717	0.000506125	0.000495985	0.000564541	0.000499039	0.000488752	0.000558781	0.000540228	0.000497417	0.000526698	0.000392542	0.000553874	0.00052098	0.000496646	0.000479868	0.000486959	0.000444885	0.000501015	0.000503021	0.000471755	0.000571927	0.000567312	0.000472006	0.000462629	0.000521136	0.000557828	0.000452095	0.000484802	0.000514042
G225	0.0113392	0.0135441	0.0119708	0.0108745	0.00738738	0.0151369	0.0122137	0.00720468	0.012448	0.00798585	0.0141123	0.0108398	0.00909924	0.0155124	0.00885659	0.00859301	0.00919862	0.0119341	0.0115455	0.0105822	0.0124398	0.0108113	0.00924676	0.00993752	0.0109458	0.0128763	0.0126115	0.0108538	0.0129971	0.0127357	0.0107547	0.00913581	0.0160553	0.00775352	0.0186759	0.0125062	0.0113096	0.0095101	0.0105734	0.00984649	0.0104773	0.0111007	0.00738174	0.0101876	0.0089528	0.0148041	0.0128233	0.013203	0.00880731
G226	0.00190141	0.00217923	0.00172733	0.00288806	0.00257729	0.00177864	0.00192278	0.00209066	0.00184971	0.00235361	0.00193982	0.00189351	0.00197142	0.00233287	0.00219736	0.00193568	0.00203215	0.00200993	0.00213526	0.00155499	0.00240819	0.00211051	0.00213246	0.00225445	0.00281806	0.00186976	0.00229147	0.00208206	0.00183458	0.00183363	0.00188762	0.00260335	0.00199227	0.00213626	0.0018288	0.0020339	0.00173795	0.00261042	0.00221127	0.00210417	0.00241056	0.00260883	0.00201707	0.0021297	0.00226566	0.00231364	0.00213908	0.00184836	0.00222877
G227	0.00531232	0.00454962	0.00426935	0.00466983	0.00463814	0.00377922	0.00370597	0.00471563	0.00425375	0.00514785	0.00412461	0.00477816	0.00524788	0.00492666	0.0053498	0.00538309	0.00484023	0.00426785	0.0037522	0.00334305	0.00525095	0.0039325	0.00464105	0.00486048	0.00431724	0.00411961	0.00408454	0.0047025	0.00438282	0.00420282	0.00397778	0.00501594	0.00474132	0.00510675	0.00347204	0.00466315	0.00385795	0.00489138	0.00515171	0.00419117	0.00411403	0.00500089	0.00460881	0.00433556	0.00469654	0.00442758	0.00405889	0.00375545	0.00457079
G228	0.000617632	0.0012403	0.000617204	0.000733426	0.000721646	0.000922882	0.00180283	0.00095648	0.00212011	0.00178177	0.000560331	0.00068235	0.000661868	0.00064905	0.000579153	0.000600903	0.00125724	0.000716551	0.00114097	0.000553933	0.00217522	0.000697085	0.0019847	0.00110688	0.00166401	0.000571492	0.0025708	0.000667595	0.00218004	0.00107272	0.000613891	0.000965727	0.00141031	0.000933377	0.000575801	0.000958864	0.000987456	0.000594517	0.000734686	0.000680542	0.000740817	0.000971632	0.0013592	0.000983019	0.00113247	0.00071717	0.000706048	0.000606184	0.00173524
G229	0.000426369	0.000624773	0.000545972	0.000578673	0.00498913	0.000423186	0.00207325	0.000440108	0.000614376	0.000709436	0.000664718	0.000674828	0.000583211	0.000430912	0.000638263	0.000469769	0.0007644	0.000515184	0.000623263	0.00096487	0.000711116	0.000596566	0.00097802	0.00063362	0.000735179	0.000778101	0.00685215	0.000590153	0.000707518	0.000694309	0.00124083	0.000541605	0.000793433	0.000515425	0.00084656	0.000542152	0.000674823	0.000612475	0.000537493	0.00386816	0.000712522	0.000400651	0.000505145	0.000486166	0.000737296	0.000546991	0.000702954	0.000749838	0.000483041
G230	0.00146839	0.00148065	0.00172066	0.00178049	0.0020937	0.00138825	0.00177852	0.00185086	0.00138918	0.00192834	0.00170631	0.00158652	0.00139736	0.0019067	0.00174836	0.00191415	0.00194731	0.00134585	0.00161594	0.00182446	0.00185871	0.00179978	0.00177856	0.00213134	0.00154656	0.00182818	0.00158354	0.0018664	0.00171586	0.00164112	0.00149895	0.00169728	0.00187102	0.00161702	0.0012601	0.00173771	0.00157738	0.00184376	0.00178668	0.00176829	0.0017994	0.0018346	0.00182355	0.00164752	0.0021769	0.00143713	0.00154323	0.00172233	0.00150771
G231	0.00140213	0.00166033	0.00132124	0.00195531	0.0020184	0.00154788	0.00140473	0.00137256	0.00151324	0.00174684	0.001454	0.00145864	0.00168244	0.00165789	0.00152809	0.00152871	0.00137853	0.00152731	0.00145428	0.0013557	0.001615	0.0016208	0.00137244	0.0015456	0.00164198	0.00129972	0.00158262	0.00159041	0.00139611	0.00137462	0.00134533	0.00182809	0.00139926	0.00147126	0.00131758	0.00128115	0.00136079	0.0016508	0.00146606	0.00162276	0.00162505	0.00196157	0.00161074	0.00148077	0.00142155	0.00173169	0.00169821	0.00127426	0.00172063
G232	0.00422173	0.00353295	0.00410662	0.00329773	0.00315188	0.00384783	0.0035751	0.00381388	0.003439	0.00431742	0.00330772	0.00400741	0.00446877	0.00353933	0.00401185	0.00354156	0.00349655	0.00365497	0.00363899	0.00367083	0.00374481	0.00349972	0.00387731	0.00358467	0.004026	0.00353235	0.0031819	0.00406248	0.0038972	0.00380148	0.00364157	0.00364577	0.00363509	0.00331381	0.00356879	0.00364342	0.00375654	0.00347683	0.0039466	0.00336647	0.00431293	0.00422235	0.00433898	0.00427281	0.00362385	0.00372614	0.00333115	0.00354417	0.00372569
G233	0.0010389	0.00104384	0.00125285	0.00156707	0.00133883	0.00104903	0.00138434	0.00170058	0.00102909	0.00111456	0.00122112	0.00109655	0.00139932	0.00107238	0.00167789	0.00132164	0.00118187	0.00109965	0.00088966	0.000844865	0.00148855	0.00150799	0.00126982	0.00130951	0.00115281	0.00148594	0.000988945	0.00119686	0.00151698	0.00102835	0.00123631	0.00141424	0.00123445	0.00181668	0.000947155	0.00115536	0.000962673	0.00191974	0.00157552	0.00152685	0.00135359	0.00151742	0.00117248	0.00121778	0.00158208	0.0011038	0.00142843	0.00148733	0.00117732
G234	0.00402083	0.0037346	0.00327862	0.00443586	0.0035721	0.00417533	0.00468173	0.00570756	0.0049421	0.00628733	0.00371987	0.00335616	0.00350798	0.00429834	0.00628426	0.00531822	0.00503344	0.00408032	0.00407548	0.0037323	0.00526698	0.00418307	0.00393856	0.0048209	0.00455227	0.00526541	0.00380719	0.00435983	0.00465767	0.00498714	0.00335177	0.00372681	0.00300674	0.0160326	0.00555139	0.00346359	0.00317097	0.00350062	0.00411133	0.00447179	0.00362506	0.00465809	0.00482563	0.00321783	0.00476678	0.0049927	0.0045701	0.00532664	0.00416642
G235	0.0077985	0.00974832	0.00810567	0.00697377	0.00725962	0.00885063	0.00815672	0.00685356	0.00864579	0.0047906	0.0114403	0.00864885	0.00773741	0.00636425	0.00645172	0.0086874	0.00843372	0.00794115	0.00870691	0.00902984	0.00843044	0.0060879	0.00589711	0.00746334	0.00596013	0.0106243	0.00821873	0.00705662	0.00928176	0.00916682	0.00956113	0.00563879	0.00842657	0.00576152	0.0110771	0.00994438	0.00943904	0.0072283	0.00550758	0.00767107	0.00631536	0.0067387	0.0052359	0.00607741	0.00853562	0.00858565	0.0074318	0.0113233	0.00689756
G236	0.00265669	0.00288271	0.00269224	0.00373758	0.00351373	0.00288638	0.00283849	0.00233307	0.00243081	0.00320925	0.00301386	0.00258421	0.00292458	0.00319172	0.00265473	0.00254191	0.00271601	0.00219149	0.0022302	0.00309558	0.00316707	0.00316897	0.00351324	0.00252562	0.00291355	0.00263607	0.00261913	0.00292569	0.00268606	0.0023834	0.00237056	0.00343398	0.0023338	0.00315724	0.0024633	0.0023447	0.00276825	0.00331572	0.00363543	0.00339818	0.00286709	0.00272516	0.00307759	0.00252562	0.00311351	0.00268143	0.00256476	0.00285287	0.00324761
G237	0.000636236	0.000747132	0.000683768	0.000806784	0.00078313	0.000640449	0.000636007	0.000628	0.000598267	0.000700601	0.000680935	0.000587303	0.000673693	0.000770143	0.00068825	0.000724338	0.000657281	0.000680107	0.000671447	0.000568873	0.000741922	0.00069532	0.00076231	0.000694275	0.000746967	0.000685838	0.0006589	0.000728839	0.00068131	0.000660261	0.000674996	0.000774046	0.000659279	0.000756103	0.000667109	0.000648557	0.000596567	0.000815383	0.00079993	0.000719593	0.000704412	0.000744341	0.000702073	0.000712323	0.000667286	0.000704535	0.000810694	0.000593463	0.000804997
G238	0.00412385	0.00322148	0.00490541	0.00565694	0.0103738	0.00494363	0.0149622	0.00685924	0.00544196	0.00578521	0.00427403	0.00483507	0.00595802	0.00365122	0.0052562	0.00374993	0.00409671	0.00400943	0.00459701	0.00800886	0.00489273	0.00444395	0.00535715	0.00394328	0.00509098	0.0045153	0.0117534	0.00441216	0.00577207	0.00462604	0.00776848	0.00333253	0.00380706	0.00402405	0.00433813	0.00568833	0.00557629	0.00370669	0.00415042	0.0173503	0.00503341	0.00397562	0.0093845	0.00447494	0.00386967	0.00454423	0.00390509	0.00410691	0.0052886
G239	0.000981726	0.00140057	0.00189793	0.00163042	0.00195715	0.0012294	0.00128189	0.00156711	0.00144274	0.00162615	0.0016116	0.0016509	0.00155834	0.00165823	0.00178101	0.00148868	0.00128394	0.00149643	0.0012327	0.00159341	0.00163487	0.00217653	0.00166269	0.0014874	0.00231287	0.00157198	0.00126002	0.00128905	0.00139912	0.0010643	0.00156224	0.00167283	0.00149761	0.00222232	0.00132991	0.00149735	0.00156265	0.00181817	0.00180163	0.00144279	0.00128923	0.00247961	0.00116193	0.00137743	0.00174064	0.00134424	0.00163963	0.00124912	0.00170695
G240	0.00085788	0.000666889	0.000864522	0.000742683	0.0011319	0.000657884	0.000807643	0.000754835	0.000761237	0.000618637	0.00076109	0.000833515	0.000915475	0.000869966	0.000964169	0.000922963	0.000728474	0.00104982	0.000807439	0.000624153	0.00104531	0.00105548	0.000975407	0.000980711	0.0009644	0.000738273	0.00123986	0.000944508	0.000879653	0.000720749	0.000730344	0.000881279	0.000973628	0.00088083	0.000627838	0.000824493	0.000766246	0.00121549	0.000922788	0.000933408	0.000954674	0.000863487	0.000743556	0.000632916	0.000952152	0.00100861	0.000924974	0.000939897	0.000919956
G241	0.00149028	0.00225021	0.00169243	0.00201305	0.00168719	0.00226609	0.00220429	0.00196906	0.00206803	0.00251298	0.00307542	0.00181041	0.00227107	0.00190175	0.00192374	0.00210129	0.00258303	0.00199659	0.00187718	0.00209922	0.00221224	0.00233205	0.00188214	0.00274402	0.00252922	0.00275986	0.00228525	0.00232303	0.00248818	0.00197008	0.00170455	0.00152254	0.00216956	0.00197512	0.00218493	0.00202175	0.0021657	0.00173945	0.00199975	0.00203214	0.00198019	0.00141148	0.00123516	0.00211188	0.00263971	0.00217902	0.00209393	0.00266942	0.00197329
G242	0.03211	0.0424176	0.0323631	0.0389895	0.0340351	0.039594	0.0382856	0.028939	0.0366132	0.0335687	0.0407708	0.0333529	0.0376019	0.0399676	0.0245328	0.0313146	0.0373234	0.0384147	0.0387187	0.0437492	0.0349035	0.0304241	0.0332562	0.0314561	0.0347152	0.038307	0.0406181	0.0372051	0.038315	0.0419109	0.0322637	0.0272501	0.0406914	0.0272398	0.0381788	0.0368086	0.0368195	0.0313862	0.0297098	0.0344217	0.0380031	0.0335818	0.0269974	0.0309437	0.0382661	0.0401925	0.0377179	0.0398425	0.0277369
G243	0.0113444	0.0145645	0.0114686	0.0130452	0.00484083	0.015685	0.00920389	0.00965321	0.0127632	0.00943571	0.00950288	0.0102998	0.00959575	0.014688	0.0178391	0.0102442	0.0114771	0.00920218	0.0111376	0.0135453	0.0113722	0.0108388	0.00964678	0.00987524	0.0134701	0.0127613	0.0132684	0.0119797	0.0138878	0.0123298	0.00852359	0.00822054	0.0113165	0.0104995	0.0198246	0.00907826	0.0096929	0.0081003	0.0171461	0.00887074	0.00796197	0.0135738	0.01186	0.00839672	0.0126746	0.016397	0.0133241	0.012616	0.0130332
G244	0.000893077	0.00144055	0.000917581	0.000861599	0.00110434	0.00118402	0.00113094	0.000744189	0.000944062	0.000994396	0.00109162	0.000930901	0.00104504	0.00111049	0.000793731	0.00084044	0.00093334	0.00127929	0.00107232	0.00136527	0.000916484	0.00126405	0.0012143	0.00110635	0.000929021	0.000832262	0.00173297	0.00103019	0.00103449	0.00101847	0.000786838	0.00109383	0.00116695	0.000968105	0.00093765	0.000947268	0.00112269	0.000994609	0.000875594	0.000954084	0.00100316	0.000923797	0.00077437	0.00068422	0.00117239	0.000946321	0.00117878	0.00074559	0.000954145
[truncated: 15 more columns]

## Sheet: E Expression Profile
G1	0.00122322	0.00149816	0.00164169	0.0019744	0.00192307	0.00177396	0.00158365	0.00153658	0.00170177	0.0022825	0.00177715	0.00197661	0.00221581	0.00197451	0.00149953	0.00149833	0.00160066	0.00172619	0.00170572	0.00147289	0.0016343	0.00257885	0.00179269	0.00165992	0.00143931	0.00145957	0.00135532	0.00187788	0.00175558	0.00158004	0.00148777	0.00158626	0.00152369	0.0015994	0.00289245	0.001752	0.0013084	0.0025214	0.00217002	0.0014438	0.00148623	0.00209951	0.00128122	0.00167619	0.00234504	0.00225379	0.00213486	0.00210011	0.00156204
G2	0.00168172	0.00160521	0.0016237	0.00216754	0.00152713	0.00199456	0.00131384	0.00199269	0.00113525	0.00209243	0.00160699	0.00269005	0.00262645	0.00199074	0.0017597	0.00151636	0.00223669	0.00195169	0.00208346	0.00204142	0.00290576	0.00184329	0.00223598	0.0013572	0.00249809	0.00200225	0.00262987	0.00294949	0.00240448	0.00209459	0.00187281	0.00178693	0.00253276	0.00235223	0.00224252	0.00222169	0.00189678	0.00200852	0.00217002	0.00175501	0.00187761	0.00262137	0.00136062	0.0024223	0.00196998	0.00248852	0.00209529	0.00140797	0.00154473
G3	0.0017448	0.00160184	0.00203438	0.00223165	0.00183321	0.00240524	0.00166227	0.0021092	0.00191886	0.00220835	0.00172783	0.00194377	0.00203128	0.00195157	0.00193798	0.00149477	0.00216858	0.00202522	0.00186501	0.00185198	0.00173329	0.002527	0.00168661	0.00205989	0.00164635	0.0016147	0.00150417	0.00221041	0.00226866	0.00219322	0.00178346	0.00195985	0.00188956	0.00147787	0.00232044	0.00168816	0.00210777	0.00227833	0.00205253	0.00228102	0.0017617	0.00171603	0.00182237	0.0021297	0.00184609	0.00213315	0.00203089	0.00200947	0.00180824
G4	0.00171256	0.00190461	0.00311531	0.00206868	0.00261913	0.00268249	0.00216848	0.00178966	0.00250545	0.00313315	0.00248309	0.00290114	0.00302223	0.00284579	0.00222359	0.00214677	0.00286535	0.00253253	0.00267252	0.00222232	0.00233673	0.00301448	0.00211381	0.00239117	0.00179884	0.00288122	0.00196549	0.00303709	0.00202139	0.00174169	0.00243658	0.00230056	0.00241123	0.00260964	0.00384923	0.00255986	0.00224413	0.00319597	0.0030375	0.00143067	0.00222931	0.00298358	0.00226825	0.0022643	0.00306029	0.00283754	0.00294566	0.00269606	0.00185793
G5	0.000785362	0.000893514	0.000837301	0.00078379	0.000957691	0.000994885	0.000886868	0.000784819	0.000915696	0.00103907	0.000719428	0.000974543	0.00102644	0.00103946	0.000843421	0.000837562	0.000878423	0.00107047	0.000860579	0.000801634	0.000909173	0.00124795	0.000814277	0.000930802	0.0008776	0.00096432	0.000859455	0.00105252	0.000994886	0.000995803	0.000880499	0.000973967	0.000913755	0.000941908	0.00136641	0.000754488	0.000891806	0.00111103	0.000939466	0.000776898	0.000753778	0.00103769	0.000769373	0.000947556	0.00104185	0.000964221	0.000949267	0.000889431	0.000722355
G6	0.00227071	0.00231296	0.00218937	0.00246393	0.00223411	0.00242761	0.00190425	0.00196912	0.00217163	0.00185066	0.00218873	0.00237747	0.00222772	0.00208123	0.00270212	0.00217755	0.00210419	0.00218369	0.00217195	0.00261999	0.00252088	0.00229824	0.00223114	0.0026628	0.00258547	0.00246165	0.00269551	0.00239817	0.00305375	0.00235877	0.00215579	0.00228969	0.00221864	0.0022692	0.00220028	0.00214271	0.00251336	0.00231805	0.00241064	0.002127	0.00226795	0.00237973	0.00234574	0.00228347	0.00242298	0.00210415	0.00290422	0.00191763	0.00203215
G7	0.00242668	0.00217666	0.0025506	0.00230714	0.00239607	0.00252398	0.00233919	0.00227758	0.00264913	0.00291496	0.00217031	0.00282951	0.00319784	0.00262456	0.003178	0.00240273	0.00249946	0.00271639	0.00252525	0.00277651	0.00324729	0.00341729	0.00245146	0.00267618	0.00204626	0.00296184	0.00235059	0.00302369	0.00331217	0.00282404	0.00260806	0.00260732	0.00278313	0.00237056	0.00346316	0.00258263	0.00255472	0.00281873	0.00326103	0.00282737	0.00245938	0.00306906	0.0023585	0.00259328	0.00305565	0.00266593	0.00273384	0.00290154	0.00281391
G8	0.000451815	0.000540094	0.000525359	0.000504714	0.000592708	0.000535905	0.000478388	0.000483481	0.000490401	0.000503236	0.00047818	0.000539711	0.000603278	0.00062746	0.000402997	0.000603628	0.000536236	0.000513071	0.000490442	0.000454782	0.000533264	0.000620492	0.000442925	0.000538931	0.000594569	0.000575957	0.000463227	0.000582078	0.000528054	0.000603565	0.000532481	0.000626328	0.000554529	0.000519735	0.000603146	0.000550336	0.000570871	0.000595706	0.000663295	0.000604597	0.000506412	0.000586142	0.000514785	0.000497396	0.000547065	0.000626934	0.00048303	0.000629132	0.000501171
G9	0.000399121	0.000403162	0.00041272	0.000464443	0.000445919	0.00046329	0.00040985	0.000442021	0.00041934	0.000455463	0.00045923	0.000440589	0.00042221	0.000380593	0.000466401	0.000446375	0.000407359	0.000495399	0.000371135	0.000428766	0.000542493	0.000486592	0.00045647	0.000484829	0.000490789	0.00056988	0.000433189	0.000516207	0.000587967	0.000532595	0.000433466	0.000453684	0.000452995	0.000420525	0.000466426	0.000441116	0.000480808	0.000431895	0.000458301	0.000475232	0.000411143	0.000439097	0.00040427	0.000474234	0.000433987	0.000374597	0.000426347	0.000434483	0.000444031
G10	0.00117133	0.00122301	0.0012296	0.00106911	0.00135429	0.00160323	0.0015046	0.00109006	0.00152933	0.00205347	0.00162629	0.00137791	0.00159537	0.00172099	0.00202427	0.00113407	0.00162436	0.00127571	0.00138962	0.00122337	0.00173629	0.00186343	0.0013107	0.00177913	0.000971507	0.00156679	0.00124183	0.00161029	0.00144216	0.00139866	0.00160554	0.00196814	0.00144172	0.00142615	0.001992	0.00153519	0.00152538	0.00151592	0.0017089	0.00156616	0.00143628	0.00133503	0.00132959	0.00142221	0.00169744	0.00155626	0.00136701	0.00156209	0.00130115
G11	0.00156683	0.00163709	0.00179156	0.00136775	0.00166078	0.00186518	0.00180692	0.00163731	0.00173444	0.00166439	0.00139872	0.00165406	0.00231505	0.00180291	0.00157422	0.00180402	0.00151037	0.00211339	0.0021089	0.00150742	0.00181187	0.00225309	0.00201664	0.00171306	0.00172725	0.00178936	0.00161813	0.00207352	0.00183405	0.00215824	0.00156612	0.00205865	0.00179849	0.00206031	0.0019302	0.00174569	0.00141483	0.0021635	0.00259794	0.00216512	0.00169782	0.00190139	0.00169376	0.00198216	0.00173444	0.00216483	0.00157936	0.00197499	0.00168407
G12	0.00670955	0.00567611	0.00637629	0.00643476	0.00782642	0.00676191	0.00564523	0.00671657	0.00613864	0.00453462	0.00524422	0.0081541	0.00620495	0.00743813	0.00843304	0.00714242	0.00724059	0.00744679	0.00715672	0.00648551	0.00701657	0.00527535	0.00881046	0.00739346	0.0069371	0.00582154	0.00928757	0.00694578	0.0070479	0.00709905	0.00588377	0.00593332	0.00875527	0.00824807	0.00501833	0.0061055	0.00715663	0.00672498	0.00664963	0.00720982	0.00708212	0.00830739	0.00617407	0.00730161	0.00706827	0.00819793	0.00850776	0.00504473	0.00577619
G13	0.0445877	0.0240755	0.0192782	0.0251775	0.0201709	0.0262732	0.0414013	0.0214081	0.0261773	0.0143861	0.0181064	0.0193582	0.0216797	0.0202828	0.0290739	0.0166255	0.0182622	0.0227548	0.0251429	0.0269874	0.0294277	0.0199319	0.0291162	0.0277712	0.0205921	0.0236693	0.0312202	0.0222364	0.043547	0.0223052	0.0205343	0.0516294	0.0202788	0.0224526	0.0227478	0.0158659	0.0213203	0.0224339	0.0218583	0.0294113	0.0203046	0.023803	0.0193987	0.0188077	0.0205663	0.0229122	0.0221115	0.021168	0.0202168
G14	0.00139883	0.00114421	0.00133729	0.00174267	0.00117972	0.00152326	0.00134266	0.00110216	0.00129045	0.00173418	0.00127868	0.00136024	0.00131656	0.00145086	0.00120852	0.00136562	0.00136214	0.00132586	0.00116919	0.00134181	0.00139516	0.00138868	0.00131703	0.0015082	0.00109784	0.00129724	0.0012032	0.00158939	0.00161697	0.00168795	0.00136514	0.00131325	0.00126314	0.00125507	0.0014773	0.00139234	0.00155569	0.00132346	0.00148122	0.00141331	0.00173904	0.00129955	0.00105504	0.0012117	0.0017712	0.00165317	0.00138112	0.00129066	0.00118923
G15	0.0151997	0.00394013	0.00385681	0.00271286	0.00457465	0.00414814	0.0239553	0.00207572	0.00300532	0.00404365	0.003201	0.0026978	0.00309661	0.00361093	0.00421411	0.00283102	0.0111662	0.00381777	0.00316072	0.00273321	0.0043526	0.00272645	0.00423193	0.0045963	0.0032532	0.00357004	0.00568203	0.00462753	0.00971098	0.00277616	0.0019294	0.0250659	0.00333012	0.00411391	0.00333845	0.00319845	0.00189323	0.001617	0.00427813	0.00259516	0.00305231	0.00282996	0.00425808	0.00360122	0.00375159	0.00461949	0.0039159	0.00283177	0.00373644
G16	0.0157905	0.0177107	0.017384	0.0341033	0.0255866	0.0116409	0.0264734	0.0251002	0.0206418	0.0250776	0.0195967	0.0135268	0.013479	0.0180588	0.0251136	0.0215886	0.0347175	0.0258809	0.0287816	0.0441217	0.0351182	0.0121157	0.0238123	0.0293047	0.0208735	0.0169593	0.0285144	0.016365	0.0438776	0.0105962	0.0167031	0.0343293	0.014468	0.0275395	0.0167236	0.0129413	0.0184801	0.0191595	0.0205683	0.0277146	0.0185451	0.0279962	0.0216402	0.0425414	0.018484	0.0246513	0.014258	0.0262473	0.029859
G17	0.00443974	0.00269088	0.00237331	0.00423944	0.0034162	0.00524324	0.00320628	0.00306112	0.00239063	0.00223751	0.00376281	0.00446672	0.00404282	0.00489112	0.00467013	0.00314624	0.00378682	0.00347011	0.00415441	0.00473728	0.00667358	0.00235048	0.00588027	0.00266871	0.00639246	0.00413261	0.0052833	0.00586969	0.00697383	0.00376514	0.00280447	0.00376706	0.0032388	0.00473181	0.00293075	0.00604841	0.00866953	0.00261478	0.00395176	0.00534978	0.00726087	0.00305005	0.00507164	0.00476397	0.00631514	0.00494257	0.00433994	0.00357237	0.0025419
G18	0.00196917	0.00169465	0.00172407	0.00144736	0.00164711	0.00210189	0.00167741	0.00124214	0.00152773	0.00189588	0.00147246	0.00205126	0.00182891	0.00203361	0.00172112	0.00141573	0.00218874	0.00191845	0.00198383	0.0018751	0.00167028	0.0021681	0.00164667	0.00134676	0.00150733	0.00205558	0.00126174	0.002134	0.0015762	0.00172183	0.0016373	0.00166236	0.00213005	0.00142422	0.00213337	0.00155641	0.00159389	0.00222136	0.00259473	0.00128621	0.00168604	0.00219401	0.00151996	0.00165698	0.00190602	0.00174836	0.00205689	0.00187204	0.00148446
G19	0.00691093	0.0072942	0.0057954	0.00514361	0.00600045	0.00524983	0.00558387	0.00593593	0.00583842	0.00591198	0.00721117	0.00562612	0.00511179	0.00549565	0.00656649	0.00611572	0.00632918	0.00542385	0.00554605	0.00555307	0.00549086	0.00505351	0.00563902	0.00611719	0.00612506	0.0056313	0.00587314	0.00543281	0.00562316	0.00479178	0.00535505	0.00540289	0.00583999	0.00575449	0.00438794	0.0068312	0.00574966	0.0049296	0.00557786	0.00590848	0.00656511	0.00479248	0.00665672	0.00588844	0.00520072	0.00527746	0.00608737	0.00539674	0.00661559
G20	0.00705426	0.00663645	0.00644718	0.00645511	0.0063531	0.00381476	0.00752458	0.00620766	0.00629548	0.00634052	0.00623938	0.00567394	0.00513911	0.00637212	0.00731696	0.00690695	0.00801353	0.00574017	0.00587796	0.00521321	0.00596201	0.00513822	0.0058704	0.0061467	0.00604693	0.00523284	0.00655898	0.00512103	0.0036631	0.00434871	0.00650279	0.00657377	0.00454688	0.00557244	0.00439437	0.0077092	0.00524719	0.00369419	0.004628	0.00654999	0.00587072	0.00558936	0.00583839	0.00542994	0.00584123	0.00530105	0.00575577	0.00538703	0.00762033
G21	0.0015892	0.00109772	0.00161198	0.00140177	0.00171823	0.00167282	0.00141665	0.00131547	0.0015411	0.00135158	0.00119142	0.00171338	0.0018908	0.00157348	0.00125076	0.00113768	0.00192224	0.00150905	0.0015962	0.00167946	0.00158337	0.00190865	0.00133312	0.0012775	0.00166455	0.00158736	0.00147856	0.00164362	0.00212973	0.00174335	0.00155195	0.00140995	0.00131491	0.00144734	0.00188725	0.00146303	0.00128879	0.00200199	0.00214137	0.00120515	0.00164328	0.00161591	0.00131153	0.00135579	0.00179755	0.00186526	0.00175761	0.00137982	0.00122813
G22	0.0112291	0.0066983	0.00662116	0.00648098	0.00831748	0.00448427	0.00767192	0.00851627	0.00583224	0.00703426	0.00895649	0.00574689	0.00668562	0.00629083	0.00818852	0.00712093	0.00704323	0.00860724	0.00464303	0.00589331	0.00618851	0.00494363	0.00577388	0.00682347	0.0070252	0.00657384	0.00745673	0.00495585	0.00532923	0.00527562	0.0053594	0.00807849	0.0056567	0.00592749	0.00602717	0.00737236	0.00402434	0.00373692	0.00461722	0.00581592	0.0060048	0.00686999	0.00802152	0.010172	0.00544108	0.00763453	0.00441838	0.00584136	0.00817639
G23	0.00348376	0.00386455	0.00384006	0.00315066	0.00355312	0.00455886	0.00316965	0.00354684	0.00313741	0.00414786	0.00360721	0.00361195	0.0043666	0.00363872	0.00280825	0.00363722	0.00379098	0.00347773	0.00370698	0.00349774	0.00326442	0.00373266	0.00358575	0.0032525	0.00360162	0.0041149	0.00301174	0.00382379	0.00387653	0.00453729	0.00371871	0.00463703	0.00392875	0.00332007	0.00419827	0.00342132	0.00312441	0.00481879	0.00357868	0.00378291	0.00375723	0.00368137	0.00350174	0.00376531	0.00373472	0.00372406	0.00356685	0.00357773	0.00353848
G24	0.000761583	0.000770367	0.000803873	0.000846433	0.000888396	0.000815132	0.000800421	0.000747924	0.000769521	0.000830604	0.000722912	0.000753042	0.000895938	0.000773397	0.000780758	0.00084217	0.000686603	0.000709025	0.000764033	0.00070643	0.000998192	0.00113794	0.000735877	0.00104608	0.000703103	0.000869094	0.000924337	0.000802247	0.000844837	0.000720477	0.00084281	0.000885782	0.000701196	0.000723181	0.00105946	0.000787721	0.00077981	0.000906196	0.000815072	0.000798383	0.000820953	0.0008401	0.000779445	0.000757499	0.000934576	0.00087311	0.0006991	0.000769794	0.000780998
G25	0.00191096	0.00154872	0.00171996	0.00150387	0.00163664	0.00173671	0.00174315	0.00162622	0.00177302	0.00190066	0.00192725	0.00174277	0.00171823	0.00139056	0.00159809	0.00127647	0.00181167	0.0015771	0.00169028	0.00193498	0.00131222	0.00180329	0.00180988	0.0020393	0.00139324	0.00127328	0.00169275	0.00246617	0.00168582	0.00165285	0.00149135	0.00142173	0.00174446	0.00158617	0.0016555	0.00183127	0.00191935	0.00159272	0.00183133	0.00182267	0.00211201	0.00183804	0.0016156	0.00134163	0.00183713	0.00161049	0.00173276	0.00175757	0.00114021
G26	0.0017474	0.00200839	0.0018524	0.00182557	0.00161217	0.00183557	0.00163865	0.00146374	0.00147978	0.00182678	0.00160004	0.00168499	0.0018755	0.00177327	0.00175987	0.00148716	0.0017461	0.00150035	0.0019118	0.00177179	0.00177635	0.00206906	0.00138547	0.00179809	0.00160035	0.00203405	0.00194376	0.00174487	0.00221536	0.00189101	0.00186096	0.0018559	0.00172449	0.00137123	0.00223719	0.00152275	0.00154705	0.0019218	0.00175241	0.00196713	0.00163375	0.00197614	0.00158405	0.00195288	0.0018445	0.00177397	0.00178859	0.00179349	0.00186538
G27	0.00104306	0.00106247	0.00105353	0.00101214	0.001015	0.00118751	0.00104419	0.000988382	0.00099714	0.00104186	0.00101858	0.00116047	0.00110395	0.00110028	0.00116054	0.00097026	0.00115583	0.00101598	0.000970688	0.00101507	0.00112279	0.00118809	0.00109862	0.000987932	0.00101854	0.0011439	0.00103814	0.00116442	0.000974386	0.00106041	0.00104787	0.0010544	0.00103925	0.000965082	0.00134595	0.000976304	0.000992327	0.00113495	0.00119517	0.00108852	0.00095901	0.0011353	0.000998783	0.00104295	0.00114039	0.00107972	0.00111642	0.0010391	0.000955668
G28	0.00061434	0.000536435	0.000786234	0.000610388	0.000883395	0.000842068	0.000620203	0.000469494	0.000619491	0.00069033	0.000797612	0.000732345	0.000805733	0.000702685	0.000509272	0.000596191	0.000715112	0.000741966	0.000667194	0.000730133	0.000823736	0.000930472	0.000592208	0.000526075	0.000583476	0.000686971	0.000562295	0.000843536	0.00067662	0.000862603	0.000769292	0.000886688	0.000677953	0.000589144	0.000995542	0.000706712	0.000622718	0.000855312	0.000656157	0.000783766	0.000664654	0.00070338	0.000527488	0.000602509	0.000927474	0.000688533	0.000728277	0.000693839	0.00052566
G29	0.000944565	0.00087722	0.000726182	0.00100554	0.000973959	0.00102492	0.000725129	0.000600868	0.000788794	0.000907249	0.000668908	0.000922807	0.00096588	0.000884353	0.00105668	0.000649316	0.000882913	0.00102754	0.00102032	0.000856577	0.000935191	0.000977701	0.000925463	0.000889836	0.000574059	0.000932216	0.000978869	0.000999107	0.00111227	0.000725543	0.00087094	0.000889821	0.00100347	0.000963819	0.00124454	0.000806282	0.00095737	0.00102801	0.00114322	0.000573528	0.000758293	0.00104578	0.000740441	0.000846603	0.000831073	0.00096305	0.00096047	0.00095193	0.00086325
G30	0.00332901	0.00323739	0.0035401	0.00295458	0.00328391	0.0035696	0.00300524	0.00306729	0.00298317	0.00279092	0.00288367	0.00393763	0.00379606	0.00308021	0.00289956	0.00313076	0.00336529	0.00331654	0.00314215	0.00389002	0.00305777	0.00309073	0.00345806	0.00297857	0.00382348	0.0036694	0.003086	0.00356384	0.0046116	0.00388733	0.00307054	0.00333078	0.00368485	0.00286293	0.00333237	0.00314	0.00363231	0.00396521	0.00398691	0.00355426	0.00302622	0.00326535	0.00307282	0.00328103	0.00327137	0.00346035	0.0036052	0.00309857	0.00302263
G31	0.00615727	0.00231277	0.00429926	0.00680745	0.00411003	0.00511343	0.00636373	0.00540613	0.00313246	0.0268618	0.00545949	0.00809814	0.00342009	0.00549416	0.00620743	0.00474671	0.00549416	0.00416817	0.00505167	0.0267219	0.00789397	0.00465718	0.00419915	0.00615658	0.00465676	0.00283993	0.00389091	0.00688168	0.00363751	0.00776214	0.0154612	0.00592095	0.00414378	0.0242991	0.00464988	0.0292696	0.0288947	0.00235305	0.00236572	0.00704233	0.017184	0.0043823	0.00410514	0.0232747	0.0175843	0.00794841	0.00382292	0.0164325	0.0040014
G32	0.0301423	0.0175649	0.0185593	0.0495175	0.0189766	0.0356394	0.0375197	0.0267533	0.0210625	0.0806608	0.0248738	0.0351316	0.027517	0.0460623	0.0408552	0.0215686	0.0359242	0.0301147	0.0330186	0.0273692	0.0593414	0.0195726	0.0395563	0.0408577	0.0347722	0.0287095	0.0505909	0.0518606	0.0255639	0.0362027	0.0426412	0.0356215	0.0265471	0.0439329	0.0211951	0.0608205	0.13204	0.0121552	0.0258181	0.0663938	0.0664186	0.0291318	0.0227714	0.0333918	0.0809498	0.0522542	0.0188498	0.0305027	0.0191126
G33	0.00592263	0.00306662	0.00480899	0.0116678	0.00626844	0.017634	0.0099778	0.00623258	0.00527489	0.00886438	0.0072712	0.0163809	0.00962711	0.0160106	0.00730173	0.00620519	0.00865197	0.00564887	0.00947451	0.006151	0.00625122	0.00667947	0.0115068	0.00357824	0.00987596	0.00675738	0.0115496	0.0174011	0.00690903	0.0159468	0.00981499	0.0135212	0.00375019	0.014183	0.00680611	0.0385079	0.0479296	0.00390946	0.010377	0.0171861	0.0238026	0.0057785	0.0065903	0.00426137	0.0157955	0.0219236	0.00851469	0.0131063	0.00397629
G34	0.00888066	0.00998099	0.00515846	0.0105775	0.00719049	0.0112875	0.0103418	0.00795531	0.0111491	0.00999495	0.00975288	0.0107363	0.00865991	0.010623	0.0126929	0.00874084	0.00797541	0.0113814	0.00989771	0.00679644	0.0115642	0.00799748	0.00925513	0.00846998	0.00985845	0.0130682	0.0111004	0.0116228	0.0126513	0.0103159	0.00789871	0.0104577	0.00772375	0.011377	0.00725649	0.0149625	0.015676	0.00770414	0.00985992	0.0128755	0.0134009	0.00861176	0.00878589	0.00907542	0.0108746	0.0102487	0.00769237	0.0104359	0.00750257
G35	0.00106679	0.00158951	0.00184202	0.00151414	0.00127743	0.00214326	0.00145426	0.00198046	0.0018282	0.00194015	0.00148136	0.0019074	0.00241957	0.00208807	0.00180364	0.00167624	0.00247195	0.00179473	0.00227259	0.00183052	0.00236005	0.00203527	0.00143216	0.00198196	0.00169509	0.00197352	0.00187915	0.00214153	0.00190285	0.0017097	0.00192856	0.00184537	0.00198033	0.00173068	0.00270411	0.00181427	0.00218244	0.00214432	0.00205301	0.00164237	0.00201273	0.00204685	0.00154429	0.0018315	0.00201756	0.00199118	0.00198256	0.00183897	0.00147416
G36	0.00106104	0.00117433	0.00128626	0.00111665	0.0011984	0.00136962	0.00110843	0.00109381	0.00118164	0.00131273	0.00114138	0.00128483	0.0014093	0.00136764	0.001269	0.00114797	0.00113161	0.0013303	0.00113531	0.00115733	0.00115799	0.00161199	0.00123474	0.00110342	0.00122255	0.00134412	0.00115642	0.00134462	0.00128456	0.00140781	0.00123282	0.00135025	0.00119189	0.00117407	0.00144803	0.00114395	0.00103997	0.00150572	0.00143687	0.00116279	0.00110944	0.0014519	0.00108601	0.00127331	0.00140025	0.00137439	0.00125006	0.00123085	0.00118177
G37	0.000862214	0.000952492	0.000861477	0.00068173	0.000848498	0.00077418	0.000812326	0.000794748	0.00081651	0.00101081	0.000748508	0.00111918	0.00104777	0.000931517	0.00110129	0.00110102	0.000978424	0.000934053	0.000976517	0.000841334	0.000993772	0.000867962	0.00095636	0.000832747	0.000774961	0.000853233	0.00101597	0.000911701	0.00103709	0.000908101	0.000831538	0.00110971	0.000743332	0.000873298	0.00128328	0.000954766	0.000655128	0.00109812	0.00100453	0.000989883	0.000915009	0.00101372	0.000908497	0.00105924	0.00105559	0.00107247	0.000985153	0.000878004	0.000901905
G38	0.0451627	0.0160595	0.0189021	0.00841508	0.0117623	0.00919126	0.0913021	0.00542622	0.0144959	0.0190462	0.0123133	0.0139945	0.00805927	0.00932183	0.00916524	0.0102433	0.0140286	0.0113964	0.0137985	0.00843896	0.00730118	0.00913764	0.00890923	0.00953594	0.0132853	0.0165072	0.0122292	0.0152578	0.00685858	0.00986416	0.0179391	0.0865299	0.0147256	0.0148187	0.0119173	0.0147352	0.0122256	0.00726276	0.0115191	0.0127087	0.0133317	0.00656015	0.0103278	0.00488743	0.0113874	0.0126581	0.0166109	0.0129375	0.00700553
G39	0.00608185	0.00612738	0.00625599	0.00783522	0.00514075	0.00629105	0.00660876	0.00606899	0.00627277	0.00386279	0.0051305	0.00591223	0.00570757	0.00592403	0.00699376	0.00565598	0.00603167	0.00556263	0.00678158	0.00682662	0.00833376	0.00624627	0.00712707	0.00710912	0.00602393	0.00578098	0.00709499	0.00603819	0.00914936	0.00617397	0.00516162	0.00480465	0.0073943	0.00511523	0.00611714	0.00514785	0.00652862	0.00670612	0.00576931	0.00678995	0.00588722	0.00569026	0.00707426	0.00622144	0.00619059	0.00515167	0.00549603	0.00465681	0.0061716
G40	0.00171423	0.00160586	0.00172359	0.00161944	0.00209611	0.0021045	0.00142903	0.00139852	0.00161747	0.00193944	0.00161346	0.00156358	0.00208016	0.00174727	0.00149162	0.00156588	0.00156135	0.00171575	0.00188173	0.00165547	0.00165031	0.00213621	0.00163442	0.00174814	0.00162536	0.00177148	0.00150131	0.00179408	0.00166085	0.00212744	0.00177734	0.00225664	0.00205318	0.00167414	0.00212034	0.00164701	0.00166255	0.00242275	0.00192162	0.00186045	0.00169973	0.00200155	0.00183909	0.00183809	0.00167239	0.00174391	0.00172915	0.00184805	0.00158506
G41	0.469404	0.513368	0.548395	0.481685	0.561511	0.603537	0.491526	0.571492	0.56972	0.569011	0.542477	0.666483	0.580179	0.619931	0.520887	0.562104	0.542688	0.609211	0.620974	0.532582	0.425364	0.576042	0.604956	0.481843	0.475382	0.631676	0.463512	0.57212	0.533764	0.635963	0.595134	0.593834	0.587983	0.617894	0.520056	0.684721	0.646604	0.608389	0.635179	0.591704	0.58216	0.652671	0.527462	0.50709	0.650811	0.643514	0.662065	0.640075	0.556416
G42	0.00277233	0.00268281	0.00347721	0.00270398	0.00274639	0.00286769	0.00251982	0.00277699	0.00243237	0.0029744	0.0022423	0.00216123	0.00275534	0.00277164	0.00316315	0.00223573	0.00269332	0.00259617	0.00279069	0.00216236	0.00295303	0.00281291	0.00373396	0.00369434	0.00216148	0.00302649	0.00317532	0.00335741	0.00327532	0.0030236	0.00263965	0.0033061	0.00236355	0.00197724	0.00304008	0.00239905	0.00290428	0.00340226	0.00322734	0.00289514	0.00261812	0.00293868	0.00224763	0.00244521	0.00256314	0.00208846	0.00252532	0.0023342	0.00225614
G43	0.000679596	0.000713218	0.000732399	0.000727378	0.000696043	0.000684736	0.000769331	0.000640698	0.000652719	0.000719966	0.000623605	0.000758496	0.00081255	0.000790116	0.00063907	0.000689808	0.000734803	0.000915718	0.000713979	0.000704791	0.000795406	0.000727229	0.000689003	0.000723269	0.000928832	0.000770327	0.000756123	0.000719167	0.000785864	0.000788087	0.000730082	0.000694216	0.000631165	0.000706032	0.000907142	0.000787851	0.000591165	0.000866639	0.000787543	0.000691015	0.000695087	0.000705432	0.000714537	0.00123688	0.00113753	0.000767359	0.000686214	0.000660508	0.000698102
G44	0.000517702	0.000632904	0.000628871	0.000658972	0.000479725	0.000621892	0.000558684	0.000554606	0.000505351	0.000563203	0.00046825	0.000598164	0.000679183	0.0007571	0.000580813	0.00055208	0.000512026	0.000652945	0.000613086	0.000627761	0.000658247	0.000646642	0.000652696	0.000532535	0.000906026	0.000639937	0.000486308	0.000647045	0.000807017	0.000761403	0.000600891	0.000815838	0.000640249	0.000632146	0.000860391	0.000558317	0.00054184	0.000766961	0.000608081	0.000624669	0.000523436	0.000676681	0.000586756	0.000836889	0.000933561	0.000598861	0.00056107	0.000617621	0.000589796
G45	0.0140467	0.0194319	0.0279231	0.0150366	0.0233733	0.0169747	0.0089744	0.0274151	0.0112477	0.403844	0.0169803	0.136096	0.00877617	0.0336025	0.0133972	0.0130445	0.016163	0.00828886	0.0174412	0.0519329	0.00475055	0.0145665	0.0125646	0.00907408	0.0244175	0.0124787	0.015977	0.010028	0.00709592	0.0102806	0.0725634	0.00878145	0.0103487	0.0162822	0.0151028	0.0347738	0.0076603	0.00997978	0.0143149	0.0217036	0.00971773	0.0522302	0.015316	0.0146918	0.148167	0.0174223	0.0121554	0.0124731	0.0172015
G46	0.0378821	0.0179762	0.012959	0.0142028	0.023461	0.01515	0.0494841	0.0146504	0.018658	0.0207994	0.0166924	0.0213737	0.0120287	0.0171923	0.017327	0.0161528	0.0247578	0.0151254	0.0160751	0.0135757	0.0144211	0.0103782	0.0188263	0.0166318	0.0172742	0.0167165	0.0188232	0.0168335	0.0124765	0.0168304	0.0172246	0.0744863	0.0148238	0.0186353	0.0138403	0.0133032	0.0112082	0.0116246	0.018119	0.0179651	0.0158283	0.0152744	0.0159651	0.0139348	0.0164043	0.0181539	0.0200923	0.0137864	0.0189085
G47	0.00942313	0.0129409	0.00966672	0.0125903	0.012602	0.0147834	0.0112843	0.0144124	0.0120217	0.00743514	0.0148592	0.0116876	0.0122577	0.0130832	0.0119139	0.0110096	0.0105514	0.0117408	0.0127897	0.0121842	0.0147374	0.0117629	0.0181726	0.0169167	0.0134202	0.0109882	0.0129505	0.0118046	0.0213763	0.0195545	0.0100628	0.0109851	0.0127421	0.0136241	0.0108952	0.0145633	0.0183039	0.0185232	0.0115607	0.0156346	0.017428	0.00849607	0.0150597	0.0118582	0.00865826	0.0124883	0.0138645	0.0139873	0.0119608
G48	0.00111828	0.00107594	0.00134176	0.00140097	0.00129298	0.0016531	0.00129491	0.00117029	0.00133875	0.00187472	0.0013144	0.0019269	0.00147803	0.00150414	0.0012595	0.00123124	0.00167377	0.00166131	0.00158544	0.00151028	0.00150965	0.00188742	0.00143195	0.00152388	0.000993294	0.00184182	0.00126952	0.00194947	0.00177724	0.00156367	0.0014697	0.00135909	0.00165976	0.0013226	0.00187496	0.00131494	0.00129702	0.00165082	0.00188596	0.00101572	0.00125133	0.00200783	0.00152728	0.00144338	0.00166432	0.00121309	0.00172605	0.00150723	0.00133804
G49	0.00119903	0.00174634	0.00168347	0.0014962	0.00144219	0.0016712	0.00162206	0.00177495	0.001748	0.00152533	0.00110935	0.00163488	0.00157141	0.00175474	0.00151387	0.0013648	0.00140755	0.00133925	0.00177194	0.00135769	0.00136947	0.00188514	0.00166386	0.00195708	0.00139396	0.00155481	0.00123362	0.00146918	0.00209338	0.00153885	0.00167978	0.00123454	0.0016614	0.00138376	0.00182068	0.00146493	0.00202399	0.00176295	0.00162394	0.00168196	0.00131633	0.00127002	0.00171018	0.00137331	0.00178127	0.00143081	0.00156668	0.00140491	0.00165344
G50	0.000904619	0.0010846	0.00127232	0.000903047	0.0012275	0.0013005	0.000901351	0.000967981	0.00108812	0.00151017	0.00102846	0.00115662	0.00126099	0.00114064	0.00101678	0.00110303	0.00111407	0.00116127	0.000921673	0.000952361	0.000895839	0.00139381	0.000947267	0.000977769	0.000903755	0.00119276	0.00102038	0.0011843	0.00118762	0.00139324	0.0010408	0.0011035	0.00094675	0.0010314	0.0016291	0.00118336	0.000936518	0.00140639	0.00121655	0.00105844	0.0010773	0.00108455	0.00104587	0.00112477	0.00128061	0.00109491	0.00117039	0.00132403	0.00107468
G51	0.0013852	0.00138068	0.00144216	0.0016249	0.00119231	0.00157845	0.00130472	0.00139159	0.00104544	0.0013873	0.00143101	0.00151652	0.00148272	0.00134939	0.00143416	0.00124282	0.001521	0.00136752	0.00159457	0.00130909	0.00143522	0.00142611	0.00196992	0.00129371	0.000982023	0.00175327	0.00137926	0.00158579	0.00165517	0.00143704	0.00117099	0.00137764	0.00144089	0.00142653	0.00149885	0.00127464	0.001292	0.00156474	0.0014499	0.00107232	0.00142103	0.00194058	0.0013602	0.00142221	0.00127921	0.00126267	0.00136509	0.00126445	0.00126835
G52	0.00706408	0.00586813	0.00502663	0.00578345	0.00696732	0.00640234	0.00553205	0.00706739	0.0069476	0.00636935	0.00680211	0.00710339	0.00734116	0.00661706	0.00581016	0.00637699	0.00607996	0.0070791	0.00627691	0.00615078	0.00708403	0.00559811	0.00728336	0.00582854	0.00678257	0.00699868	0.00599121	0.00735721	0.00641623	0.00738445	0.00620063	0.00571342	0.00657438	0.00655904	0.00612284	0.00707182	0.0068306	0.0079949	0.00772409	0.00464182	0.005817	0.00685356	0.00690258	0.0062975	0.00689904	0.00762295	0.00760887	0.00692074	0.00576751
G53	0.000708441	0.000744721	0.000824525	0.000743797	0.000767126	0.000773093	0.00117321	0.00063817	0.000636246	0.0281198	0.000758284	0.00176192	0.000898734	0.000973681	0.000576156	0.00103346	0.000660649	0.000760389	0.000690165	0.000871326	0.000872945	0.000746524	0.000762593	0.000741636	0.000698861	0.000671433	0.000738697	0.000782053	0.000744015	0.000724667	0.00317382	0.00117574	0.000625802	0.000531429	0.00064679	0.00196066	0.000969573	0.000757094	0.00073557	0.000932542	0.000756277	0.000658623	0.000711405	0.000450303	0.00601075	0.000747573	0.000800888	0.00093803	0.000770657
G54	0.123326	0.0972851	0.104232	0.134904	0.116419	0.125649	0.124665	0.118866	0.137202	0.0715222	0.0823969	0.117064	0.111209	0.102238	0.116527	0.112548	0.112787	0.102409	0.13773	0.094666	0.133954	0.113206	0.116053	0.141639	0.109451	0.115341	0.126706	0.110756	0.11745	0.131394	0.115096	0.104633	0.114112	0.101097	0.106882	0.107167	0.142766	0.136105	0.133781	0.122163	0.125786	0.101327	0.110394	0.11118	0.116114	0.110014	0.128941	0.119476	0.107826
G55	0.0198057	0.0214245	0.0180361	0.0166844	0.016858	0.0225864	0.0108786	0.0212656	0.015659	0.0093833	0.0223959	0.0192362	0.0254439	0.0159562	0.0213312	0.0195731	0.0181825	0.0185036	0.0198059	0.0296973	0.0221693	0.0185141	0.019548	0.0234448	0.0194833	0.0187253	0.0200499	0.0184503	0.0307527	0.0219609	0.0151911	0.0154224	0.0285063	0.0174257	0.0147264	0.0186702	0.0188292	0.026013	0.0241489	0.0210908	0.0193924	0.0148381	0.0220612	0.0212979	0.0190043	0.0225176	0.0234096	0.0185799	0.0184028
G56	0.0602755	0.0201875	0.0265607	0.0223163	0.0216599	0.0141807	0.0870398	0.00780653	0.0150061	0.0181596	0.01831	0.0178594	0.0104091	0.01842	0.0137899	0.0182863	0.0280113	0.0151643	0.017855	0.0105833	0.0180483	0.0114089	0.0122837	0.0136419	0.020452	0.0155447	0.0310959	0.0294371	0.0274576	0.0128383	0.0147651	0.0548991	0.0157522	0.0175047	0.0113652	0.020389	0.0206387	0.0105323	0.0155297	0.0175346	0.0130727	0.0108812	0.010717	0.00808354	0.0238284	0.01598	0.0187692	0.0169177	0.00920437
G57	0.0429219	0.0299217	0.0236535	0.0285749	0.0254662	0.0157962	0.019553	0.0308624	0.0292359	0.0400241	0.0250893	0.0279932	0.0222564	0.0239094	0.0348986	0.0242202	0.025535	0.0307437	0.0235805	0.0321517	0.0256673	0.0246133	0.0265821	0.025039	0.0220378	0.0230381	0.0303268	0.0236923	0.0177647	0.0249607	0.0242148	0.0272771	0.0179228	0.0277502	0.0364034	0.0205998	0.0172007	0.0208788	0.0308064	0.0264338	0.0226602	0.0307043	0.0218	0.0210509	0.020228	0.0240251	0.0248117	0.0245914	0.0332457
G58	0.00277343	0.00308713	0.0039898	0.00286951	0.00328373	0.00407892	0.00256856	0.0028281	0.00314167	0.0045756	0.00351129	0.00372832	0.00462043	0.00382008	0.00260093	0.00316653	0.00350266	0.00359692	0.00317684	0.00319948	0.00292058	0.0035411	0.0030453	0.00303045	0.00368827	0.00379747	0.00274983	0.0042141	0.00401554	0.00434916	0.00317338	0.0036126	0.00318277	0.00296198	0.00452314	0.00347322	0.00303016	0.00438512	0.00501561	0.00327503	0.00292798	0.00393724	0.00332279	0.00348201	0.00403901	0.00421657	0.00374857	0.00371038	0.00350992
G59	0.00624534	0.00301627	0.00193083	0.00214026	0.00201493	0.00263798	0.00940779	0.0021816	0.00221491	0.00189379	0.00261254	0.00240381	0.00192821	0.00220821	0.00200257	0.00193274	0.00493372	0.00245176	0.00212167	0.00231057	0.00243594	0.00248755	0.00306911	0.00397581	0.00163024	0.00184731	0.00318608	0.00240354	0.00351307	0.0021508	0.00186143	0.00912066	0.00245041	0.00219194	0.00234017	0.00173439	0.00147906	0.0020714	0.00330776	0.00207957	0.00203766	0.00215321	0.00216404	0.0020996	0.00170547	0.00397107	0.00281918	0.00231791	0.00250993
G60	0.00178652	0.0021399	0.00230276	0.00196538	0.00234812	0.00259527	0.00191302	0.0016328	0.00232394	0.0022333	0.00201122	0.00239786	0.00226285	0.0026065	0.00142819	0.00193322	0.00186915	0.00205846	0.00228697	0.00241443	0.00200681	0.00263677	0.00252432	0.00202899	0.00206017	0.00219449	0.0020059	0.00230202	0.00212761	0.00235848	0.00196385	0.0028984	0.00217494	0.00191511	0.00243136	0.00207181	0.00207245	0.00271604	0.00280673	0.00155827	0.00225868	0.00268175	0.00207368	0.00203681	0.00249136	0.0026954	0.00208715	0.00248866	0.00206819
G61	0.00113461	0.0011526	0.000945024	0.00131972	0.00100944	0.00123463	0.000947659	0.00100424	0.000909028	0.00140683	0.00112489	0.000952713	0.00149056	0.00102082	0.000979509	0.000812312	0.000976942	0.00114878	0.0010091	0.000929878	0.00131074	0.00119298	0.00119724	0.00143298	0.000978009	0.0011421	0.000974241	0.00122492	0.00142133	0.0012069	0.000970097	0.00145947	0.000960483	0.00111143	0.00135798	0.00092191	0.00101483	0.00109874	0.000915743	0.000810944	0.00104947	0.0013128	0.000964943	0.00130154	0.00110577	0.00107128	0.00084039	0.00116009	0.00103537
G62	0.0501194	0.0669655	0.04357	0.0658598	0.0510687	0.0482296	0.0525095	0.0636848	0.072226	0.048763	0.0571272	0.0720006	0.0572231	0.0647566	0.0680223	0.0675698	0.0622571	0.058108	0.0693895	0.03806	0.0791933	0.0582944	0.0673131	0.0562393	0.0823751	0.0679248	0.0620137	0.0695099	0.112296	0.0666732	0.0484786	0.0472449	0.0602645	0.0673285	0.0565481	0.065501	0.0593414	0.0807621	0.0652998	0.0715726	0.0679092	0.0516435	0.0503991	0.0441312	0.0675716	0.0664628	0.0689781	0.0672124	0.0627014
G63	0.000343711	0.0003284	0.000302884	0.000269192	0.000324179	0.000534455	0.000309919	0.000305799	0.000338456	0.000300663	0.000260609	0.000273814	0.000298273	0.000282124	0.000294731	0.000256612	0.000274349	0.000264474	0.000342588	0.000283763	0.000431601	0.000346125	0.00028317	0.000279669	0.000258097	0.000378935	0.000341609	0.000424058	0.000291431	0.000335997	0.000318483	0.000369876	0.000754653	0.000285843	0.000295101	0.0002931	0.00025994	0.000289023	0.000300543	0.000282777	0.000329897	0.000291189	0.000278363	0.000279553	0.000275313	0.000292257	0.000302269	0.000302344	0.000230177
G64	0.00546819	0.00543693	0.00403324	0.00469374	0.00531883	0.00651517	0.00383323	0.00527248	0.00433274	0.0035662	0.00579312	0.00592928	0.00590749	0.00480053	0.00639598	0.00471806	0.00478434	0.00509398	0.00496139	0.00636266	0.00654862	0.00448827	0.00582316	0.00658838	0.00579112	0.00504344	0.00619501	0.00602215	0.00823703	0.0059317	0.00433243	0.00451122	0.0061815	0.00489951	0.00502769	0.0049208	0.00548511	0.00635853	0.00549313	0.00539666	0.00457846	0.00409352	0.00511718	0.0053234	0.00494394	0.00479033	0.00594605	0.00426133	0.00437152
G65	0.00469737	0.00529474	0.00559424	0.00247237	0.00336051	0.00331719	0.00432975	0.00366101	0.00360778	0.00618073	0.00586966	0.00343055	0.00349934	0.00399037	0.00314926	0.00457086	0.00355332	0.00349421	0.00345986	0.00334646	0.00205559	0.00362136	0.00343988	0.00230284	0.00360307	0.00291269	0.00335593	0.00259814	0.00234301	0.00329206	0.00762737	0.0033983	0.00502706	0.00409262	0.00345658	0.00607363	0.0031049	0.00297473	0.00310317	0.00427938	0.00374057	0.00272562	0.00398314	0.00300738	0.00385551	0.00361203	0.00368129	0.00350748	0.00435893
G66	0.00252653	0.00330705	0.0033224	0.00281394	0.00366091	0.00406751	0.00301927	0.00332731	0.00330886	0.00295097	0.00326876	0.00421874	0.00420711	0.00283893	0.00291791	0.00320812	0.00339609	0.00292028	0.00360626	0.00434438	0.00343161	0.0038358	0.00349645	0.00335728	0.00350586	0.00300695	0.00318519	0.00349742	0.00502688	0.00395013	0.00325142	0.00309594	0.00445487	0.00316913	0.00364987	0.00313894	0.004027	0.0043525	0.00373847	0.00361062	0.00314589	0.00303938	0.00368232	0.00351756	0.0035189	0.0034355	0.00418404	0.00318118	0.00312863
G67	0.000380157	0.000561848	0.000503882	0.000500917	0.000636676	0.000457042	0.000414063	0.000415172	0.000515447	0.000495449	0.000506177	0.000455829	0.000629914	0.000509495	0.000537525	0.000435578	0.000501482	0.000429587	0.000381783	0.000373183	0.000590527	0.000575647	0.000469829	0.000464704	0.000480709	0.000433121	0.00056021	0.000499243	0.000621736	0.000603512	0.000672175	0.000431069	0.000451989	0.000417437	0.000641215	0.000610932	0.000376799	0.000614978	0.000489093	0.00052426	0.000404283	0.000498851	0.000455247	0.000424916	0.000585042	0.000562129	0.000455342	0.000500917	0.000471365
G68	0.00694517	0.00600309	0.00502311	0.00571319	0.005882	0.00574216	0.00656367	0.00678953	0.00605352	0.00584996	0.00561654	0.0152051	0.00448767	0.00585791	0.00689827	0.00514513	0.00742893	0.00519025	0.00910983	0.0166712	0.00629565	0.00500143	0.00942667	0.00697672	0.00545413	0.00545963	0.00647895	0.00636557	0.0244979	0.00524764	0.00586626	0.0145512	0.0048547	0.00896739	0.00659529	0.00468094	0.00536885	0.00415975	0.0169255	0.0130595	0.00739017	0.00511587	0.0124636	0.0181793	0.00673689	0.0061753	0.0123831	0.00477794	0.0104291
G69	0.00197856	0.0019395	0.00151998	0.00145973	0.00136295	0.00214677	0.0020405	0.00127318	0.00172868	0.0255991	0.00215002	0.0049286	0.00178255	0.00150635	0.00211984	0.00172758	0.00157516	0.00127941	0.00181286	0.00441902	0.00212203	0.00184954	0.00204837	0.00181829	0.00154415	0.0013636	0.0015012	0.0020799	0.00166798	0.00185008	0.00344723	0.00204013	0.00275043	0.00197619	0.00212024	0.00250366	0.00174057	0.00219631	0.00177896	0.00263019	0.00232637	0.00182551	0.00174008	0.00189925	0.0134072	0.0016655	0.00204985	0.0017642	0.00186643
G70	0.00542164	0.00273635	0.00313386	0.00314703	0.00219564	0.00353713	0.0025321	0.00245893	0.00291616	0.00371822	0.00267924	0.0050593	0.00371822	0.00306018	0.00351735	0.00386183	0.00302596	0.00359406	0.00257453	0.0028979	0.00360122	0.00473721	0.00278605	0.00317264	0.00267296	0.00337575	0.00292523	0.0043469	0.00320963	0.00446641	0.003734	0.00290693	0.00579755	0.00313917	0.00521263	0.00257549	0.00340681	0.004708	0.00418802	0.00137277	0.00287963	0.0054561	0.00280856	0.00336642	0.00439503	0.00351754	0.00471813	0.00333076	0.00291103
G71	0.00169467	0.00196388	0.00167804	0.00173793	0.00176067	0.00208066	0.00181372	0.00181528	0.00169602	0.00177172	0.00148802	0.00211101	0.00196186	0.00192252	0.00166373	0.00169092	0.00192277	0.00205345	0.00187731	0.00204227	0.00245134	0.00215156	0.00186241	0.00220085	0.00156536	0.00230166	0.00174977	0.00206678	0.00284362	0.00197079	0.0017478	0.00174125	0.00178238	0.00203835	0.00207809	0.00165501	0.00167599	0.00236409	0.00236419	0.00178732	0.00166145	0.00248373	0.00199712	0.00208219	0.00210867	0.00159008	0.00209585	0.0019232	0.00171339
G72	0.00269935	0.00202811	0.00269707	0.00270782	0.00311189	0.00292305	0.0022698	0.00247476	0.00289306	0.00314929	0.00205062	0.00243031	0.00366215	0.00303917	0.00249685	0.00227571	0.00249928	0.00224435	0.00270535	0.00279523	0.00391645	0.0028382	0.00299968	0.00255308	0.00384136	0.00226479	0.00302728	0.00303182	0.00393051	0.00314751	0.00289782	0.00299008	0.00358018	0.00248125	0.00302292	0.00302783	0.00478071	0.00406396	0.00322002	0.00293749	0.00289459	0.00231058	0.00253499	0.00201145	0.00292069	0.00339718	0.00252588	0.00344014	0.00203215
G73	0.0010672	0.00107541	0.00111208	0.0010394	0.00106077	0.00119191	0.00108806	0.00113731	0.001157	0.00112433	0.0010302	0.00106412	0.00122778	0.00107758	0.0011083	0.00111385	0.00102256	0.00103824	0.00108715	0.000989519	0.00107499	0.00136227	0.00107218	0.00105224	0.00104989	0.00128924	0.00124899	0.00134498	0.00108396	0.00123752	0.00097529	0.00119287	0.00102984	0.00114253	0.00109162	0.00118185	0.00114433	0.00121151	0.00127444	0.00145661	0.0010084	0.00109074	0.00103672	0.000991164	0.00122476	0.00133945	0.00103339	0.00127046	0.001075
G74	0.00394071	0.00402559	0.00427842	0.00429511	0.00427796	0.0043386	0.00359305	0.00394856	0.00438753	0.00474255	0.00392191	0.00514085	0.00454949	0.0042094	0.0049178	0.00411697	0.00408922	0.00373664	0.00359149	0.00408992	0.00483501	0.00413292	0.0041104	0.00497435	0.00422882	0.00408275	0.00445268	0.00553488	0.00585335	0.00418468	0.00400145	0.00506173	0.00339809	0.00428189	0.00541675	0.00509092	0.00350045	0.00504799	0.00613522	0.00439899	0.00349705	0.00408669	0.00409264	0.00462323	0.0046602	0.00447237	0.00415352	0.0041313	0.00436841
G75	0.00157192	0.00164029	0.00225485	0.0023726	0.00211587	0.00228304	0.00248089	0.00184242	0.00215897	0.00209194	0.0016718	0.00251074	0.00213221	0.00236876	0.0020881	0.0016454	0.00207073	0.00221649	0.00211753	0.00170608	0.00210315	0.00275648	0.00212145	0.00213249	0.00163718	0.00208581	0.00181004	0.00259378	0.00295576	0.00252405	0.00205983	0.00215885	0.00158686	0.002157	0.00273247	0.00188536	0.0015689	0.00235227	0.0025426	0.0017648	0.00185739	0.00225253	0.00206026	0.00240042	0.00242244	0.00227738	0.00259529	0.00198232	0.00208718
G76	0.00462251	0.00560467	0.00674645	0.00523247	0.00891461	0.00439964	0.0049933	0.00511312	0.00489841	0.00329242	0.00500491	0.00478918	0.0055738	0.004468	0.00951585	0.00615609	0.00442903	0.00477964	0.00842528	0.00596942	0.00400459	0.00496615	0.00841023	0.00541165	0.00598982	0.00625986	0.00507721	0.00616958	0.00509597	0.00345892	0.00970322	0.00407241	0.0072462	0.00597982	0.00606115	0.00401195	0.00348903	0.00483039	0.00521754	0.00505317	0.00523655	0.00464101	0.00492539	0.00776687	0.00509588	0.00351306	0.00571959	0.0055725	0.00453636
G77	0.0193713	0.0108491	0.0181079	0.00929579	0.0148948	0.0190081	0.0450034	0.00981179	0.0126493	0.029698	0.0228294	0.0157528	0.0138055	0.016594	0.00904688	0.0193037	0.0340743	0.017497	0.0146652	0.00849943	0.00852406	0.0131244	0.0130309	0.0106281	0.014338	0.0156677	0.0161051	0.0315222	0.0115393	0.0193757	0.0174373	0.0494239	0.0195514	0.0151128	0.0200199	0.0226775	0.0140341	0.00883376	0.0221133	0.00888701	0.01361	0.0148585	0.016438	0.00990045	0.0233233	0.0283083	0.0219663	0.0203002	0.0126141
G78	0.00078146	0.000981827	0.00104632	0.000979105	0.000887042	0.00110745	0.00101564	0.000878547	0.00112494	0.00116827	0.00085242	0.00111746	0.00131805	0.0010763	0.000870723	0.0010185	0.0010514	0.00107016	0.000991872	0.00126004	0.00102404	0.0016177	0.00095636	0.000822464	0.000969871	0.00121854	0.000850191	0.00122014	0.000935772	0.00106951	0.00103646	0.000968358	0.00104798	0.000961577	0.00131828	0.000975147	0.000931014	0.0014636	0.00110483	0.000893702	0.00100247	0.00129265	0.000875231	0.000903223	0.00137348	0.000964422	0.000952466	0.0011131	0.000872806
G79	0.0073592	0.00735247	0.00629022	0.00822914	0.00540229	0.00607343	0.00774146	0.00513555	0.00705253	0.00676516	0.006025	0.00661808	0.00566714	0.00754886	0.00797769	0.00634849	0.00777133	0.00571555	0.0111043	0.00661146	0.00830986	0.00507201	0.00906662	0.00625868	0.0100605	0.00853004	0.0070619	0.00740152	0.00493512	0.00692696	0.00482221	0.00760335	0.00689959	0.0075435	0.00553845	0.0107179	0.0132201	0.00610464	0.00757969	0.00967187	0.0152278	0.00476312	0.00558479	0.00690036	0.00756963	0.00842468	0.00612904	0.00707918	0.00606971
G80	0.00292082	0.00321984	0.00287492	0.00272775	0.00305896	0.00366184	0.00274741	0.00316916	0.00290928	0.00319186	0.00302926	0.00246679	0.00321475	0.00314284	0.00303089	0.00270756	0.00297555	0.00298901	0.00310152	0.0031447	0.00334752	0.00329495	0.00322924	0.00275836	0.0027643	0.00328031	0.00289297	0.00345866	0.00369408	0.00335499	0.00288617	0.00319211	0.00296511	0.00291903	0.00405562	0.00296282	0.00319273	0.00341638	0.0035366	0.00279662	0.00278833	0.00339531	0.00274306	0.00344865	0.00286533	0.00322863	0.0026213	0.00308624	0.00286442
G81	0.00404443	0.00363581	0.00543171	0.00403788	0.00450085	0.00634335	0.00347405	0.00360598	0.00426085	0.00635263	0.00307378	0.00650553	0.00783919	0.00622656	0.00456378	0.00391527	0.00591951	0.0058438	0.00502686	0.00601142	0.00514317	0.00874129	0.00438646	0.00376425	0.00621849	0.00619721	0.00431477	0.00675954	0.00625397	0.00524125	0.00580796	0.00587049	0.00575493	0.00425619	0.00969764	0.00523681	0.00370623	0.00797174	0.00680073	0.00493339	0.00590681	0.00642783	0.00408489	0.00527681	0.00653491	0.00744836	0.00561303	0.00594186	0.00480171
G82	0.00117449	0.00109548	0.00118022	0.00105159	0.00121204	0.00138395	0.00128981	0.00105094	0.00113672	0.00115032	0.000993593	0.00125217	0.00123589	0.00125619	0.00104811	0.00119852	0.0012505	0.00113715	0.0011051	0.000983612	0.00121056	0.00139398	0.001285	0.00101464	0.00100363	0.00129377	0.00109771	0.0013979	0.00134633	0.00114774	0.00116979	0.00128757	0.00116256	0.00123088	0.00159323	0.000929642	0.000948328	0.00133752	0.00133385	0.0011811	0.00115118	0.0014432	0.00115818	0.0012835	0.00123546	0.00137946	0.00124398	0.00122698	0.00108983
G83	0.00157368	0.00143556	0.00166004	0.00155153	0.00167822	0.00146023	0.00154421	0.00133482	0.00153117	0.00155896	0.00168964	0.00161886	0.00189054	0.00166929	0.00133007	0.00124436	0.00177403	0.00181175	0.00165545	0.00160374	0.00150317	0.00231925	0.00161942	0.00141099	0.00140059	0.00159594	0.00161462	0.00192144	0.00191736	0.00196614	0.00158513	0.00182932	0.0013823	0.00131786	0.00253335	0.00131709	0.00141189	0.00224318	0.00195445	0.001608	0.00176034	0.00194417	0.00152819	0.00162016	0.00198117	0.0017909	0.00149119	0.00163125	0.00150069
G84	0.0245241	0.00275341	0.020135	0.0131924	0.00754123	0.0300778	0.0140236	0.0260486	0.00889488	0.00256902	0.00915625	0.00719978	0.0183597	0.0136965	0.00439352	0.016603	0.0165165	0.00579975	0.0197619	0.00584269	0.0279777	0.0284602	0.0174571	0.0110391	0.00343152	0.00393791	0.0149177	0.010034	0.0223451	0.00166098	0.0138369	0.0338813	0.0229531	0.0189597	0.0098876	0.00687061	0.00644857	0.0244835	0.00796382	0.00864516	0.00823437	0.0313219	0.00249406	0.00388377	0.0547165	0.0107469	0.00944197	0.0122346	0.00744024
G85	0.0501225	0.0154735	0.0126912	0.0123422	0.0200722	0.0155239	0.0822028	0.00785466	0.0132402	0.0143337	0.0117892	0.0147286	0.00613202	0.0100823	0.0183498	0.0118278	0.0204335	0.0114144	0.0122373	0.00672046	0.0114223	0.0072112	0.0146974	0.0125469	0.0162699	0.0171284	0.0176118	0.0161322	0.017425	0.0101938	0.0179017	0.120413	0.011362	0.0191475	0.0111851	0.0142504	0.00878449	0.00596421	0.0115262	0.0138369	0.0108574	0.00746895	0.0119043	0.00610764	0.00684208	0.0135129	0.0167891	0.0110081	0.0117903
G86	0.0034018	0.00401792	0.00427044	0.00369067	0.00371154	0.00388476	0.00361499	0.00288625	0.00363464	0.00402315	0.00351265	0.00334689	0.00416293	0.0042334	0.00252517	0.00321442	0.00309485	0.00318	0.0048338	0.00329005	0.00412548	0.00358624	0.00493486	0.00307273	0.00434004	0.0029218	0.00291735	0.00299807	0.00363019	0.00415411	0.00341378	0.00386196	0.00328575	0.00363831	0.00353244	0.00493493	0.00792345	0.00367399	0.003312	0.0042987	0.00488669	0.00361926	0.00298004	0.00366144	0.00454525	0.00467655	0.00385872	0.00375695	0.00274541
G87	0.00471769	0.00234765	0.00326511	0.00413585	0.00331267	0.00618556	0.00636505	0.00846699	0.0082919	0.00519052	0.00206686	0.0134617	0.00428406	0.00706562	0.011115	0.00956859	0.00719735	0.00709615	0.00804197	0.00812329	0.0195932	0.00404368	0.00205624	0.0125851	0.00775475	0.00816955	0.0102436	0.00967467	0.00809506	0.0157767	0.00631268	0.00290958	0.0151482	0.00825722	0.00478936	0.00814131	0.0115783	0.00450999	0.00256576	0.0175323	0.00883404	0.0063115	0.00909177	0.0105525	0.00303783	0.00352786	0.00595814	0.00510962	0.00427486
G88	0.0011442	0.00124482	0.001017	0.000799193	0.000909168	0.00103005	0.00103005	0.00101475	0.000980195	0.00171956	0.000962098	0.00127002	0.00102523	0.00110679	0.00120326	0.00109397	0.00128874	0.00101624	0.00108051	0.000805389	0.00103111	0.00113341	0.00113101	0.000914963	0.00103787	0.00103731	0.00106556	0.0012796	0.00117426	0.00122643	0.0010134	0.00116001	0.00102974	0.00121031	0.000992758	0.00144409	0.000904159	0.00130649	0.00144784	0.00139506	0.00133724	0.00114098	0.00117789	0.00104809	0.00114676	0.00128859	0.0010382	0.00155	0.00103727
G89	0.00402021	0.00582907	0.00512829	0.00539834	0.00636521	0.00711509	0.00557981	0.00478781	0.00638113	0.00597528	0.00599517	0.00612792	0.0068149	0.00513152	0.00394812	0.00542787	0.00557171	0.00521668	0.00553012	0.00539699	0.00578956	0.00397055	0.00508138	0.00524878	0.00527515	0.00588079	0.00500984	0.00595266	0.00619926	0.00631927	0.00581238	0.00680007	0.00577673	0.00538608	0.00593576	0.00584546	0.00766943	0.0058308	0.00585525	0.00660273	0.0058206	0.00507395	0.00650133	0.00508721	0.00672698	0.00642242	0.00618221	0.00593737	0.00530111
G90	0.00189067	0.00188827	0.0018674	0.00195761	0.00185103	0.00225527	0.00208785	0.00163132	0.00195951	0.00186105	0.00186876	0.00176908	0.00186402	0.0022223	0.00252646	0.00175213	0.00200202	0.00212061	0.001936	0.00188979	0.00248195	0.00191232	0.0020613	0.00241398	0.00176796	0.00256219	0.00256693	0.00251702	0.00282266	0.00176194	0.00190379	0.00180108	0.00188127	0.00211995	0.00181747	0.00185301	0.00199621	0.00223903	0.00207967	0.00183738	0.00161499	0.00218966	0.00189267	0.00199138	0.00184404	0.0019242	0.00184755	0.00213558	0.00199932
G91	0.00216402	0.00210244	0.00254317	0.00147956	0.00247665	0.00248204	0.00172322	0.00242356	0.00254586	0.00245305	0.00213717	0.00272108	0.0025231	0.0024737	0.00186734	0.00237115	0.00271048	0.00242641	0.00201902	0.00237621	0.00258622	0.00251594	0.00236971	0.00245352	0.00216067	0.00218254	0.0024189	0.00219168	0.00158051	0.00245891	0.00239317	0.0028319	0.00205598	0.00220895	0.00258436	0.00177094	0.00221208	0.00262767	0.002404	0.0022475	0.00205928	0.00259757	0.00224681	0.00260694	0.00259329	0.00214517	0.00214829	0.0019549	0.00201807
G92	0.00288871	0.0029537	0.00308326	0.00281745	0.00280034	0.00353467	0.00264452	0.0027718	0.00288043	0.00280701	0.00292316	0.00344925	0.00330137	0.00348889	0.00252787	0.00297155	0.00350257	0.00294553	0.00313593	0.00288843	0.00316156	0.00338239	0.00328015	0.00274021	0.00257318	0.00356396	0.00311962	0.00290229	0.00360397	0.00357092	0.00330101	0.0029882	0.00315677	0.00279796	0.00408135	0.00306815	0.00299144	0.00392383	0.00360721	0.00290312	0.00292549	0.00343072	0.00289536	0.00328418	0.00345511	0.00354115	0.00360851	0.0029573	0.00297964
G93	0.000918182	0.000994516	0.0011506	0.000935005	0.00102901	0.000972065	0.000893393	0.000948214	0.00103396	0.00125211	0.000925469	0.00101164	0.0013128	0.000982987	0.00107033	0.0010609	0.000991564	0.00109889	0.0011156	0.000943067	0.000976179	0.00105305	0.000850718	0.000889906	0.00108234	0.000928689	0.000937261	0.00127068	0.00126612	0.00138941	0.000899609	0.00102181	0.00103291	0.000887482	0.000982422	0.000995882	0.000968289	0.00137772	0.0017555	0.00117283	0.000970543	0.00129035	0.00101636	0.000889064	0.00103076	0.00107861	0.000902258	0.00115652	0.00105488
G94	0.00547219	0.00497719	0.00394743	0.00504796	0.00418795	0.004105	0.00510249	0.0048432	0.0044771	0.00300431	0.00417654	0.00460257	0.0049299	0.0047345	0.00592463	0.0043308	0.00416061	0.00375207	0.00440619	0.0049694	0.00489677	0.00462437	0.00576507	0.00561384	0.00422578	0.00449945	0.00572598	0.00488366	0.00484563	0.00567269	0.00457651	0.00478158	0.004445	0.00440448	0.00444436	0.00379592	0.00557642	0.00484636	0.00453743	0.00457137	0.00479354	0.0047454	0.0044696	0.0050606	0.00433007	0.00447644	0.00430871	0.00425745	0.00404584
G95	0.132422	0.0320952	0.0333467	0.0473298	0.0623698	0.0255834	0.329827	0.0273774	0.04681	0.0315409	0.0376723	0.0307015	0.0337538	0.0232521	0.0556294	0.0240046	0.0497118	0.0387415	0.040859	0.0338136	0.0460291	0.0352508	0.0462963	0.0403349	0.0340971	0.0498056	0.0455316	0.0500596	0.0818662	0.0354974	0.0471229	0.321723	0.0321124	0.0462007	0.0440822	0.0189624	0.0322026	0.0255425	0.0421143	0.0406989	0.0366088	0.0263419	0.0358415	0.02611	0.0320699	0.0389751	0.0443897	0.0321435	0.0263432
G96	0.083696	0.0265766	0.0225256	0.0214332	0.0406322	0.018109	0.193505	0.0170005	0.0237755	0.0327201	0.0204969	0.0362595	0.0118619	0.0242514	0.0372887	0.018936	0.0460682	0.023479	0.0203288	0.0124362	0.027785	0.0171993	0.0374401	0.0237243	0.0339193	0.0269867	0.0350695	0.0344746	0.030679	0.0190599	0.0378097	0.218266	0.0194043	0.0447105	0.0240644	0.0344205	0.012159	0.010064	0.0252711	0.0228821	0.0177101	0.0166835	0.02092	0.0123255	0.0169129	0.0357124	0.0360629	0.0226853	0.0228818
G97	0.0546875	0.0378429	0.0424467	0.0268863	0.0498282	0.0312799	0.0975242	0.0364329	0.0299793	0.0635981	0.0468845	0.0416597	0.030649	0.0412833	0.0408586	0.0353636	0.0565429	0.040252	0.0291551	0.0230714	0.0264981	0.0291194	0.0395077	0.0271294	0.0438716	0.0347857	0.0397117	0.0462814	0.0213452	0.0304319	0.0466373	0.14518	0.0315271	0.0451962	0.0475886	0.0485655	0.0140822	0.0212061	0.0379454	0.0270586	0.0264467	0.0503189	0.0428789	0.0481357	0.0310464	0.0494267	0.0423641	0.0329903	0.0394855
G98	0.0251933	0.0148027	0.0184425	0.0132245	0.0177586	0.0150597	0.0442297	0.0140569	0.0130523	0.0169174	0.0142793	0.0142198	0.0101349	0.0153775	0.0129435	0.0177919	0.0188062	0.0165914	0.0122302	0.00815371	0.00982106	0.0151407	0.0136857	0.0121585	0.013225	0.0164761	0.0143816	0.0140025	0.0122205	0.0119709	0.0212996	0.0500456	0.014332	0.0168904	0.0143841	0.0188078	0.01443	0.0117811	0.0166384	0.0177673	0.0131777	0.0136703	0.0169581	0.00844482	0.0136982	0.0171867	0.0204084	0.0128018	0.0155264
G99	0.344504	0.282437	0.262266	0.284879	0.386174	0.214634	0.709553	0.277174	0.294419	0.31918	0.219689	0.241861	0.23684	0.279812	0.281146	0.26253	0.319705	0.312336	0.283724	0.259883	0.38535	0.231333	0.281884	0.379958	0.311234	0.232202	0.258429	0.228996	0.271837	0.258252	0.382946	0.646993	0.167968	0.318707	0.370484	0.27793	0.264191	0.252211	0.271101	0.295984	0.259528	0.310889	0.260353	0.299279	0.308393	0.312861	0.256111	0.225219	0.332656
G100	0.00112729	0.000930004	0.00120329	0.00145099	0.00102771	0.00149855	0.00136246	0.00105982	0.00136163	0.0014724	0.0009997	0.00137388	0.00145577	0.00139363	0.00089708	0.00094521	0.00146219	0.00132694	0.00126364	0.00121794	0.00109465	0.00147998	0.00129538	0.00142575	0.00097371	0.00164612	0.00158809	0.00160323	0.00205044	0.00111428	0.00133733	0.0013341	0.00161427	0.00132598	0.00167955	0.000927107	0.00106201	0.00141421	0.00175256	0.000965432	0.00130182	0.00159374	0.00122407	0.00105369	0.00116287	0.00140243	0.00141562	0.00115902	0.00136494
G101	0.00145209	0.00135381	0.00158816	0.00170378	0.00176828	0.00148947	0.00144117	0.00152328	0.00162466	0.00172962	0.00163259	0.00174718	0.00197368	0.00180428	0.00131914	0.00129507	0.00160851	0.00154582	0.00169337	0.00184198	0.00203331	0.0021112	0.0014123	0.00175743	0.0015944	0.00145266	0.00139946	0.00191032	0.00229125	0.00164618	0.00148252	0.00161145	0.00151285	0.00137275	0.00217226	0.00161776	0.00136203	0.00204702	0.00189662	0.00211685	0.00146681	0.00153815	0.00153694	0.00135515	0.00176997	0.00164146	0.00146107	0.00149833	0.00163891
G102	0.00160673	0.00166588	0.0010833	0.00151884	0.0018568	0.00149998	0.00118195	0.00125916	0.00132183	0.00152495	0.00124885	0.00123313	0.00132122	0.00139391	0.00165671	0.00116946	0.00122674	0.00119152	0.00104506	0.00213879	0.00155442	0.00133256	0.00159607	0.00137516	0.00163091	0.00199244	0.0014834	0.00120123	0.00215378	0.00111101	0.00141912	0.00128244	0.00134529	0.00143681	0.00122958	0.00111501	0.00144923	0.00109265	0.000876086	0.00133562	0.0012372	0.00152661	0.00139784	0.00170966	0.00122548	0.00143245	0.001199	0.00106691	0.00145011
G103	0.00130917	0.0012928	0.00141011	0.00131978	0.00131161	0.0016181	0.00132089	0.00122498	0.00126971	0.00135865	0.00128983	0.00116721	0.00163704	0.00139463	0.00110989	0.00124374	0.00122607	0.00145801	0.0012576	0.00115031	0.00138637	0.00163975	0.00110426	0.00126281	0.00123366	0.00133602	0.00119532	0.00148423	0.00128193	0.00156285	0.00120159	0.00169336	0.00144959	0.00124256	0.00161362	0.00129845	0.00125393	0.00155107	0.00142547	0.00150724	0.00107237	0.00144323	0.00122572	0.00140307	0.00131615	0.00128998	0.00114381	0.00142644	0.00127878
G104	0.00893846	0.00691094	0.0103411	0.00669069	0.00700731	0.00429536	0.00913596	0.00637503	0.00642464	0.010947	0.00698131	0.00476475	0.00562773	0.00633285	0.00682305	0.00595302	0.00964431	0.00817354	0.00368559	0.00504181	0.00693541	0.00584907	0.00519989	0.00714684	0.00581662	0.00709101	0.00637468	0.00567827	0.00386279	0.00429285	0.00849954	0.00965674	0.0049544	0.00726084	0.00475871	0.00494766	0.00437825	0.00427159	0.00394422	0.00499807	0.00557387	0.00541202	0.00602763	0.00575626	0.0052427	0.00577006	0.00531842	0.00466172	0.00700118
G105	0.0013231	0.00144953	0.00141404	0.00131457	0.00134644	0.00191363	0.00136838	0.00124649	0.00123132	0.0019642	0.00125642	0.00172297	0.00184873	0.00168821	0.00132425	0.00136744	0.00156753	0.00193385	0.00147714	0.0015351	0.0014596	0.00192214	0.0012129	0.00111719	0.00133364	0.00149463	0.00104313	0.00173745	0.00144529	0.00149281	0.00154656	0.00141548	0.00152788	0.00129918	0.00223659	0.00157725	0.00138034	0.00160002	0.001963	0.00144234	0.00128433	0.00178702	0.00123816	0.00140255	0.00204793	0.00175943	0.001679	0.00177312	0.00139671
G106	0.0725034	0.0256525	0.0271717	0.0262283	0.0260159	0.0241364	0.0606483	0.0215623	0.0329819	0.0328713	0.0229467	0.0317048	0.0344852	0.0187218	0.0320218	0.0257368	0.0627501	0.0268986	0.0372133	0.0245968	0.0226187	0.0293582	0.0229754	0.0226341	0.0262845	0.0313823	0.0286919	0.0567475	0.0207715	0.0288573	0.0292103	0.0825065	0.02378	0.0528059	0.0204456	0.0348212	0.0272357	0.0210938	0.0272324	0.0284112	0.0306346	0.0269664	0.0217098	0.020963	0.0300822	0.0453542	0.0308385	0.0408612	0.0290122
G107	0.000664581	0.000483054	0.000617109	0.000749928	0.00063725	0.000567599	0.000647901	0.000695815	0.000647372	0.000677188	0.000600753	0.000574329	0.000629377	0.000682332	0.000610142	0.000587218	0.000617813	0.000538366	0.000664939	0.0006262	0.000664716	0.000575857	0.000717401	0.000521697	0.000652223	0.000725055	0.000567627	0.000545747	0.000686462	0.000669407	0.000671049	0.000618642	0.000643587	0.000671736	0.000725903	0.00107719	0.0010075	0.000536362	0.000581625	0.000780364	0.000954435	0.00066677	0.000538218	0.000542458	0.000662501	0.000628663	0.000525391	0.000654971	0.000616149
G108	0.0155096	0.00885899	0.00678933	0.00949199	0.00881772	0.00752993	0.026308	0.00872779	0.0101958	0.00551806	0.0136883	0.00984021	0.00656078	0.00774651	0.0105982	0.0105546	0.0105244	0.00771722	0.0102308	0.0111226	0.0125452	0.00696437	0.0111135	0.0132159	0.0087889	0.0101633	0.0100506	0.00976408	0.0469476	0.00784294	0.00770499	0.0269878	0.0123844	0.00988696	0.00821035	0.00683386	0.0078172	0.0110875	0.0109754	0.00964639	0.00690734	0.00562197	0.00924652	0.0093141	0.00591405	0.00615517	0.011613	0.00824983	0.0101866
G109	0.00193386	0.00240955	0.00197062	0.00250431	0.00210632	0.00230801	0.00203803	0.00195531	0.00198363	0.00308681	0.00205875	0.00216313	0.00278325	0.00222931	0.00164313	0.00234373	0.0020104	0.00208489	0.00201385	0.00216652	0.00233981	0.00284547	0.00185191	0.00159063	0.00226234	0.00225818	0.00131703	0.00202423	0.00265875	0.00259271	0.00208009	0.00270077	0.00199529	0.00212671	0.00324787	0.00195934	0.00234583	0.00259563	0.00194154	0.00230493	0.00206093	0.00220358	0.00201259	0.00269088	0.0021173	0.00244718	0.0020566	0.00235746	0.00210605
G110	0.00233228	0.0023909	0.00294332	0.0023544	0.00265873	0.00328641	0.00239296	0.00241801	0.00257086	0.00244795	0.00248048	0.0024393	0.00299462	0.00252613	0.00193079	0.00268336	0.00262613	0.00265566	0.00263864	0.00265392	0.00256155	0.00262529	0.00273371	0.00271175	0.00250185	0.00320418	0.00247573	0.00270469	0.00362191	0.00259403	0.00317752	0.00274651	0.00281656	0.00242407	0.0031908	0.00287351	0.00273627	0.00363292	0.00305749	0.00263215	0.00232738	0.00305838	0.00267763	0.00296698	0.00347244	0.00276479	0.00290336	0.00235805	0.00278148
G111	0.000653881	0.00049244	0.000487146	0.000573366	0.000593929	0.000563559	0.000524973	0.000613418	0.00052471	0.000480836	0.00056947	0.000746736	0.000548709	0.000430087	0.0020106	0.000693554	0.000411566	0.00119274	0.000295952	0.000453354	0.000516194	0.000474778	0.000334828	0.000477644	0.000670414	0.000435166	0.000873851	0.000582467	0.000342075	0.000386087	0.00166664	0.0011986	0.000424631	0.0004308	0.000421115	0.000906168	0.000465485	0.000405879	0.000432586	0.000480978	0.000423059	0.000536158	0.000506894	0.000500625	0.000442214	0.000613761	0.000418729	0.000502259	0.00053047
G112	0.00093535	0.000914594	0.00106307	0.0011089	0.00100795	0.0010431	0.000932764	0.00096313	0.00106945	0.000990203	0.000729517	0.00101036	0.00109647	0.000745293	0.000971096	0.00092251	0.00100533	0.000937595	0.00091492	0.000688511	0.00128198	0.00108635	0.0010258	0.00101134	0.000841491	0.000898485	0.000900592	0.00136673	0.0010635	0.000975698	0.000882895	0.000843448	0.00111768	0.000822375	0.00102441	0.000959151	0.00106597	0.00111778	0.00117499	0.000921365	0.000822284	0.000963605	0.000801215	0.000959117	0.00127779	0.000985646	0.000854978	0.000960273	0.00110518
G113	0.00105158	0.000704997	0.00101797	0.000897277	0.000999111	0.00113811	0.00100702	0.00059764	0.000838714	0.00109202	0.000740725	0.00126373	0.000990262	0.000846145	0.000726458	0.000756637	0.000999135	0.00123461	0.000924918	0.00100341	0.000887933	0.000792184	0.000757181	0.00102256	0.000641391	0.00114458	0.000738553	0.00112116	0.00104515	0.000787293	0.000843097	0.000737928	0.000835624	0.000750744	0.00124496	0.000648963	0.000604714	0.00112586	0.00132642	0.000864292	0.000693076	0.00125118	0.000700256	0.000728382	0.00097087	0.000798336	0.000928898	0.000788154	0.000760486
G114	0.00101534	0.00115468	0.00126538	0.000969514	0.00112846	0.0013543	0.000951217	0.00113984	0.00111525	0.00120112	0.00108099	0.00120803	0.00137875	0.00132683	0.000969739	0.00111514	0.00116004	0.00107487	0.00104733	0.000957441	0.000932146	0.00154945	0.00112496	0.000942154	0.00106701	0.00118878	0.000909357	0.00116016	0.00142375	0.00155328	0.00114828	0.00127934	0.00112683	0.00107857	0.00160494	0.00116628	0.000976362	0.00156362	0.00132192	0.00111859	0.000930652	0.00124576	0.00105696	0.00115614	0.00129845	0.00117289	0.00125646	0.00119254	0.00110097
G115	0.00180229	0.00174297	0.00210101	0.00229617	0.00233016	0.00310695	0.00193388	0.00233742	0.00198117	0.00237175	0.00279261	0.00275258	0.00273556	0.00239386	0.00231514	0.00201462	0.00228443	0.00208472	0.0021332	0.00303866	0.00331467	0.00233489	0.00240452	0.00273155	0.00357822	0.00191015	0.0024653	0.00321414	0.00293886	0.00300824	0.00187964	0.00192478	0.00267835	0.0023516	0.00260325	0.0020595	0.00407515	0.00267029	0.00252395	0.00198628	0.00261144	0.00226183	0.00205739	0.00250469	0.00305884	0.00288522	0.00246332	0.00194663	0.00170773
G116	0.00073543	0.000757871	0.00115833	0.000828566	0.00102513	0.00119198	0.00114277	0.000889349	0.000797309	0.00117777	0.000989491	0.00118093	0.00105745	0.00106935	0.000835553	0.000693023	0.00138433	0.00101067	0.001053	0.00112693	0.00136945	0.00126823	0.00074736	0.000972799	0.000649562	0.00124937	0.00102727	0.00118234	0.00100386	0.000917861	0.000980507	0.000987161	0.00108	0.000787478	0.00126685	0.00107006	0.000706185	0.00112813	0.00146609	0.000896053	0.00104299	0.00109837	0.000903524	0.000974806	0.00134042	0.00108408	0.00101973	0.00116607	0.000862596
G117	0.0318586	0.0184184	0.0193033	0.061717	0.0296068	0.0424856	0.0541754	0.0241045	0.0230036	0.0616059	0.0420752	0.0502655	0.0302896	0.063694	0.0429886	0.0233703	0.0463284	0.0262938	0.0396536	0.0517557	0.0759394	0.0249366	0.0828125	0.0377516	0.0872157	0.0435016	0.0511065	0.0855263	0.0663629	0.0637753	0.0358071	0.0841351	0.0287399	0.101476	0.0369766	0.0820645	0.166264	0.0279281	0.04759	0.0918022	0.115491	0.0293734	0.0419153	0.0373048	0.0968645	0.0961374	0.0192615	0.0593813	0.0194558
G118	0.00188415	0.002874	0.00295808	0.00212461	0.00279809	0.00313932	0.00220632	0.002935	0.00309974	0.00364694	0.00230201	0.00359481	0.00389932	0.00348154	0.00211837	0.00282906	0.00304192	0.00268755	0.00284651	0.00226611	0.00190638	0.0042537	0.0024753	0.00228598	0.00311071	0.00365852	0.00223789	0.00258845	0.00284612	0.00381553	0.00264598	0.00239885	0.002945	0.00255137	0.00316222	0.00269408	0.00243337	0.00390282	0.0033904	0.00276356	0.00262873	0.00379291	0.00258162	0.00311238	0.00308185	0.0034762	0.00292583	0.00346756	0.0031445
G119	0.00353427	0.00380213	0.00333946	0.00278161	0.00371409	0.00369768	0.00304471	0.00317324	0.00325454	0.00331572	0.00291045	0.00340843	0.00355543	0.00373916	0.00349934	0.00325902	0.00331826	0.00278852	0.00318255	0.00309478	0.00386416	0.0039495	0.00308987	0.00359738	0.00392397	0.00335569	0.00330893	0.00300868	0.00408844	0.00384052	0.00300266	0.00378097	0.00267542	0.00316717	0.00412194	0.00343014	0.00342742	0.00425212	0.00370184	0.00470534	0.00253665	0.0031588	0.00339353	0.00336572	0.00339517	0.00358884	0.00302798	0.00377465	0.00425514
G120	0.0114023	0.00729271	0.00730849	0.00820181	0.0081451	0.00535943	0.015224	0.00723846	0.00770834	0.00554227	0.0079736	0.00919841	0.00688489	0.00609133	0.00824177	0.00833613	0.0080135	0.00760871	0.00810776	0.0053527	0.00858157	0.00487401	0.008322	0.00642702	0.00695517	0.00710755	0.0106348	0.00692842	0.00710755	0.00658793	0.00712644	0.0186754	0.00546975	0.00830787	0.00526763	0.0101537	0.00824591	0.00556518	0.00719183	0.00807814	0.00935612	0.00446098	0.0076774	0.00648248	0.00955944	0.00987545	0.00822147	0.00667577	0.00773749
G121	0.00223664	0.00181537	0.00268155	0.00200454	0.00201817	0.00271176	0.00208479	0.0015168	0.00181201	0.00299302	0.00173722	0.00288753	0.00274818	0.00262559	0.00182264	0.00180655	0.00269407	0.00250566	0.00245416	0.00243281	0.00244923	0.00275648	0.00187549	0.00186039	0.00131947	0.0026749	0.00187485	0.00276443	0.00201251	0.00165057	0.00263311	0.00204447	0.0022109	0.00226642	0.00291296	0.00250869	0.00151208	0.00308973	0.00256902	0.00116074	0.00199244	0.00225889	0.00143235	0.00217471	0.00275104	0.00276797	0.00177761	0.00229491	0.00193284
G122	0.000931939	0.000624177	0.000813137	0.000760759	0.000868677	0.000758604	0.000849021	0.000579346	0.000750549	0.000893183	0.000681408	0.000916691	0.000901123	0.000910487	0.000692889	0.000766735	0.000684117	0.000667254	0.000734015	0.000905407	0.000629183	0.000947114	0.00073421	0.000701012	0.000676031	0.000866371	0.000756768	0.000962004	0.000807967	0.000765621	0.000894953	0.000668377	0.000668952	0.000833405	0.000823917	0.000764896	0.000874955	0.000914215	0.000751786	0.000554651	0.000745322	0.000941006	0.000667763	0.000801408	0.000869143	0.000858955	0.00091639	0.000820564	0.000792416
G123	0.00054712	0.000603393	0.000614313	0.000565235	0.000582704	0.000774415	0.000540304	0.000637566	0.000587883	0.000573162	0.00038757	0.000611673	0.000617558	0.000662796	0.000598271	0.000570317	0.000659821	0.000570466	0.000635016	0.000599515	0.000514657	0.000686627	0.000681412	0.000662911	0.000569951	0.000718365	0.000524762	0.000663226	0.000597498	0.000568191	0.000655126	0.000462919	0.000498486	0.000595158	0.000668712	0.000605857	0.000523061	0.000625252	0.000746858	0.000427833	0.000594508	0.000499649	0.000522962	0.000568123	0.00058747	0.000499637	0.000636309	0.000649489	0.000497477
G124	0.000643898	0.000616961	0.000617445	0.000633136	0.000780097	0.000663143	0.000509754	0.000571902	0.000573181	0.000558225	0.000536953	0.000561483	0.000712521	0.000547962	0.000588743	0.000625228	0.000639275	0.000726106	0.000645732	0.000573735	0.000597906	0.00073258	0.00058218	0.000556618	0.000657575	0.000601305	0.000587918	0.000711191	0.00099586	0.000678465	0.000684653	0.00066959	0.000608192	0.000643518	0.000775574	0.000576428	0.000638923	0.000644107	0.000713493	0.000707699	0.000575384	0.000640516	0.000636639	0.000570642	0.000759078	0.000669648	0.000583687	0.000592098	0.000557034
G125	0.000824595	0.000863784	0.00076105	0.000513089	0.00110437	0.000438671	0.000637566	0.000722787	0.000613869	0.000624126	0.000725453	0.000648003	0.000647688	0.000632534	0.000540601	0.000763252	0.000821499	0.000710569	0.000522535	0.00084838	0.000708889	0.000432391	0.000788783	0.000692103	0.000563767	0.000726651	0.000873835	0.000519314	0.000598713	0.000570433	0.000715004	0.000479706	0.000547025	0.000680488	0.000550092	0.000624921	0.000532756	0.000516016	0.000654108	0.00101228	0.000630978	0.000669482	0.000715804	0.000530302	0.000534432	0.000644756	0.000709594	0.000563974	0.000784537
G126	0.00256698	0.00253161	0.00264191	0.00240696	0.00246731	0.00293646	0.00252526	0.00239974	0.00224124	0.00320151	0.00254791	0.00266514	0.00266485	0.00222243	0.00254059	0.00196853	0.00264516	0.00245727	0.00240395	0.00265484	0.00278525	0.00283079	0.00266918	0.00269665	0.00238682	0.00249296	0.00220493	0.00306952	0.00285887	0.00326099	0.00239839	0.00233374	0.0024212	0.00243324	0.00316986	0.0022994	0.00332307	0.0026466	0.00354708	0.00279968	0.00214903	0.00258121	0.00235321	0.00235301	0.00240788	0.0024697	0.0025723	0.00215567	0.00204424
G127	0.000585578	0.000494383	0.000543861	0.000635777	0.000529245	0.000559114	0.000617299	0.000504963	0.000598923	0.000579601	0.000465293	0.000596905	0.000622122	0.000564242	0.000614841	0.000439263	0.000562828	0.000604232	0.000568798	0.000503165	0.000749369	0.000532583	0.000515397	0.000744272	0.000485664	0.000542812	0.000627667	0.000639547	0.000627353	0.000574786	0.000517049	0.000549672	0.000609267	0.000531037	0.000599212	0.00047014	0.000495847	0.000623818	0.000658127	0.000563469	0.000515997	0.000603334	0.000551379	0.000526581	0.000655702	0.000603647	0.000499452	0.000501684	0.000504442
G128	0.00130616	0.00125269	0.00147206	0.00149249	0.00169154	0.00120434	0.00132162	0.00136152	0.0010604	0.0015283	0.00141461	0.00147592	0.00180217	0.00180248	0.00152758	0.00123845	0.00136094	0.00127031	0.00125782	0.0014991	0.00191452	0.00179798	0.00134406	0.00165324	0.00142537	0.00149525	0.00178476	0.00168053	0.00226413	0.00157989	0.00145702	0.00166245	0.00136208	0.00171944	0.00171679	0.00129127	0.00134959	0.00164917	0.00168937	0.00166726	0.00134062	0.001578	0.00145138	0.00149981	0.00171071	0.00170865	0.00136879	0.00152055	0.00155576
G129	0.000788689	0.00111544	0.00098873	0.000873748	0.00110906	0.00124879	0.000981868	0.000945995	0.00109785	0.00121328	0.00106349	0.00111335	0.00127187	0.00112915	0.000941558	0.00080148	0.000977066	0.00136491	0.0010848	0.00105317	0.00095395	0.00121822	0.00133738	0.00121536	0.00109819	0.00126935	0.00135356	0.00114393	0.0012224	0.00137522	0.000925183	0.000969427	0.00129382	0.00110816	0.00123504	0.00118699	0.00108443	0.00133338	0.00143824	0.00106484	0.000907173	0.00147122	0.000889108	0.000869119	0.00135083	0.00131651	0.00112068	0.00133952	0.00121366
G130	0.00225087	0.000839801	0.00117131	0.00169866	0.00211811	0.000907831	0.0021765	0.00115189	0.00147073	0.00191706	0.000630244	0.000588695	0.000922751	0.000971308	0.00224752	0.000825759	0.000883804	0.00102158	0.000951314	0.00109403	0.00243064	0.00110173	0.000928626	0.000855295	0.00168913	0.000915716	0.00128044	0.000916034	0.00113954	0.00130046	0.00113613	0.000903055	0.00128612	0.00103562	0.00165259	0.000587169	0.0029921	0.000963776	0.000894808	0.000867577	0.00101137	0.00224933	0.00106896	0.00099969	0.00109754	0.00110499	0.00103032	0.000952673	0.00111306
G131	0.00256151	0.00247622	0.00292932	0.00328878	0.00269244	0.00325419	0.00308932	0.00309311	0.00242873	0.00328923	0.00219569	0.00380815	0.0037886	0.00327954	0.00275718	0.00343942	0.00452088	0.00384491	0.00330324	0.0035755	0.00368678	0.00346348	0.00358378	0.00320945	0.00241701	0.00369025	0.0031712	0.0036931	0.0029843	0.00284577	0.00404742	0.00287142	0.00387351	0.00327415	0.00323677	0.00261753	0.0025797	0.00448611	0.00466969	0.0023607	0.00328759	0.0032128	0.00343853	0.00351852	0.00401082	0.00375775	0.0035773	0.00356061	0.00310397
G132	0.00142488	0.00131667	0.00336283	0.000799193	0.000729761	0.000912791	0.000707098	0.000849039	0.000847861	0.000843592	0.00101912	0.00139682	0.00277604	0.000955594	0.00120191	0.00134771	0.000807276	0.000986347	0.000976517	0.00195607	0.00114529	0.000923455	0.00115098	0.00110828	0.000805594	0.00150876	0.00196549	0.000813477	0.00109628	0.000957329	0.000977815	0.000711197	0.00104631	0.00107072	0.00100662	0.00108896	0.000921128	0.00103502	0.000929782	0.00191142	0.00164975	0.000874931	0.000984251	0.000760147	0.00105832	0.00131707	0.000874981	0.00111137	0.000870924
G133	0.000662943	0.000786343	0.000975218	0.000811255	0.000935504	0.00081906	0.000893393	0.000748103	0.000986225	0.00144273	0.0006498	0.000768294	0.00121883	0.000875972	0.00108976	0.000887851	0.000995724	0.000971575	0.00083321	0.000727102	0.00132299	0.00136916	0.000777506	0.000728174	0.000919439	0.0010569	0.000808353	0.000891432	0.000825595	0.00100555	0.000987099	0.000836762	0.000861518	0.000747011	0.00125793	0.00100354	0.000778487	0.000928743	0.00112057	0.000931263	0.000914588	0.000991265	0.000695143	0.000920048	0.00109077	0.00091098	0.000872652	0.00110811	0.000881941
G134	0.00135147	0.00158135	0.00151278	0.00122625	0.00157556	0.00187167	0.00131894	0.00143528	0.00160477	0.00141054	0.00124481	0.00128636	0.00162726	0.00148493	0.00126016	0.00123607	0.00137725	0.00134466	0.00144895	0.00119828	0.00166096	0.00171409	0.00124346	0.0013013	0.00130663	0.00157965	0.00138549	0.00150928	0.00141347	0.00153384	0.00138024	0.00134633	0.00171385	0.00125842	0.00168157	0.00122266	0.00142688	0.00150873	0.0018708	0.00138995	0.00119068	0.00141004	0.00145644	0.00132753	0.00156432	0.00143807	0.00139113	0.00175046	0.00135972
G135	0.000389134	0.000370015	0.000404637	0.00030569	0.000390438	0.000312551	0.000312808	0.000336292	0.000297916	0.000421061	0.000345146	0.000311132	0.000293172	0.000336157	0.000293994	0.000337413	0.000309624	0.000344577	0.000326758	0.000337178	0.000240004	0.000335843	0.000305501	0.00031911	0.000317548	0.000432066	0.00033357	0.000280531	0.000327784	0.000289666	0.000299579	0.000373342	0.000291033	0.000266683	0.000274145	0.000315508	0.000314139	0.000334759	0.000299836	0.000407309	0.000334096	0.000328448	0.000386032	0.000339989	0.000313333	0.000285548	0.000266134	0.000320576	0.00032404
G136	0.000800098	0.000776332	0.00104786	0.000567925	0.000761951	0.000944375	0.000731964	0.000829723	0.000820681	0.00103817	0.000645159	0.000845182	0.001238	0.000877995	0.000763739	0.000917018	0.000796656	0.000779683	0.000724906	0.00100525	0.000860908	0.00100772	0.000789233	0.000780563	0.000808769	0.000958792	0.000755237	0.00086057	0.000911714	0.00105527	0.000842754	0.00124701	0.000919722	0.000964251	0.0010694	0.000730856	0.000727274	0.000899866	0.00110993	0.000980832	0.00081398	0.000863519	0.000785086	0.000851304	0.000766444	0.000855766	0.000810761	0.000986171	0.000815811
G137	0.00325006	0.00428081	0.0033759	0.00458991	0.00454562	0.0059627	0.00460331	0.00373461	0.00386307	0.00333286	0.0032358	0.00397457	0.00501884	0.00480384	0.00340964	0.00364465	0.00361933	0.00419138	0.00384314	0.00320122	0.0045432	0.00475984	0.00422541	0.00387312	0.00294395	0.00359632	0.00375382	0.00471395	0.00399833	0.00389527	0.00343485	0.00439608	0.00452588	0.00334496	0.00564762	0.00403892	0.00464041	0.0037882	0.00530213	0.00357344	0.00399636	0.00375086	0.00434531	0.00332172	0.00469284	0.00397526	0.00508559	0.00368027	0.00336381
G138	0.00232383	0.00204047	0.0031971	0.00178374	0.00229362	0.00261661	0.00190668	0.0019977	0.00209193	0.00239851	0.00185411	0.00287678	0.00323961	0.00261672	0.00202879	0.0022834	0.00279402	0.00234019	0.00232778	0.00208423	0.00230901	0.00305322	0.00254645	0.00237958	0.00204372	0.00269336	0.00227099	0.0031576	0.00252855	0.00244336	0.00220673	0.00240129	0.00198753	0.0021823	0.00277014	0.00232067	0.00204542	0.00242578	0.00283744	0.00242107	0.00245192	0.00274494	0.00198527	0.00223714	0.00272796	0.00255078	0.00191815	0.00243202	0.00174781
G139	0.000780642	0.000593831	0.000784314	0.000834123	0.0007778	0.000697419	0.000741231	0.000606319	0.000633324	0.000795911	0.000633191	0.000685126	0.000687611	0.000723152	0.00070851	0.000559809	0.000659794	0.000734694	0.000735012	0.000657685	0.000616373	0.00069212	0.000660839	0.000794452	0.000624016	0.000684765	0.000586486	0.000743933	0.000806956	0.000591238	0.000756031	0.000573692	0.000706305	0.000679894	0.000802946	0.000580934	0.000609076	0.000774068	0.00082653	0.000602249	0.000616176	0.000687349	0.000604062	0.000565702	0.00071861	0.000726622	0.000730977	0.000721235	0.000666227
G140	0.0186323	0.0136055	0.0118882	0.0118268	0.0105342	0.00714811	0.0147651	0.0117104	0.00907021	0.00940774	0.0115662	0.00801269	0.00622762	0.0077016	0.0114241	0.010014	0.0102938	0.00809892	0.00971371	0.00808209	0.00841687	0.00849929	0.0143056	0.0124727	0.00725985	0.00890809	0.00962111	0.00821938	0.00754589	0.00609599	0.0100421	0.00822334	0.00965066	0.012205	0.00909292	0.0126279	0.00814351	0.00552717	0.0095491	0.0118146	0.00794919	0.00902466	0.00878827	0.0100856	0.00789379	0.0078421	0.00768203	0.0074472	0.0185095
G141	0.00113822	0.000885943	0.0010169	0.000949405	0.000894635	0.000986774	0.000629842	0.000692761	0.000822013	0.00116115	0.000830261	0.000790127	0.000854229	0.0010271	0.00103735	0.000807141	0.00104086	0.00104793	0.000972962	0.00108931	0.00132686	0.00104756	0.00100397	0.00109882	0.000938762	0.00102857	0.000999762	0.00167703	0.00124796	0.00102891	0.00118986	0.0011473	0.000997952	0.00099191	0.00107421	0.000851325	0.000738021	0.00102637	0.00128885	0.00082987	0.000794876	0.00115508	0.000724449	0.000903075	0.000931323	0.000793481	0.000965745	0.00102211	0.000977055
G142	0.00512741	0.0049526	0.00488082	0.00477785	0.00402281	0.00495339	0.00411312	0.0045283	0.00468416	0.00403156	0.00467244	0.00430158	0.00460093	0.00428686	0.00455065	0.00471069	0.00414842	0.00385301	0.00421771	0.00558009	0.00577006	0.00557392	0.00523081	0.00487695	0.00466541	0.00460126	0.00493509	0.00501156	0.0064469	0.00559875	0.00417432	0.00429844	0.00579059	0.00460964	0.00522595	0.00414091	0.00564492	0.00621612	0.00461034	0.00530573	0.00427301	0.00424729	0.00498525	0.00472227	0.00462982	0.00433093	0.00512107	0.00451317	0.00448877
G143	0.00381331	0.00486126	0.00478368	0.0038372	0.00369072	0.00404797	0.00400252	0.0039826	0.00376011	0.0173471	0.00443822	0.00316227	0.00275931	0.00411182	0.00418549	0.00420015	0.00312453	0.00318353	0.00328748	0.00491269	0.00168127	0.00362563	0.00397993	0.00339337	0.00434312	0.00268602	0.00309749	0.00407312	0.00246393	0.00412039	0.00452171	0.00360411	0.00281966	0.00336609	0.00488906	0.00601367	0.00474009	0.00292825	0.00260349	0.00463654	0.00435263	0.00420111	0.00486988	0.00425375	0.00519176	0.0042002	0.00308993	0.00360477	0.0037528
G144	0.000966678	0.000876919	0.000950274	0.000832589	0.000943981	0.00111855	0.000870929	0.000928481	0.000883241	0.00102089	0.000855066	0.000916211	0.0010727	0.000938611	0.00092728	0.000879549	0.000930554	0.00091435	0.000927814	0.00095332	0.000943222	0.00104491	0.000902216	0.000923174	0.000972263	0.000993982	0.000948552	0.00100891	0.000992725	0.00110526	0.000878983	0.000906952	0.000987181	0.000858303	0.00107248	0.000898996	0.000897003	0.00109628	0.00115107	0.000922901	0.000919545	0.00109142	0.000867939	0.000953545	0.00103443	0.0010778	0.000963787	0.000979105	0.000845693
G145	0.00205925	0.00268473	0.00251836	0.0018305	0.0019703	0.00316657	0.00205894	0.00266723	0.00191516	0.00206697	0.00234932	0.00314577	0.00308793	0.00245292	0.00288169	0.00220031	0.00287525	0.0027357	0.00234707	0.00276165	0.00276466	0.00258876	0.00315125	0.00293193	0.00212817	0.00211706	0.00226873	0.00394854	0.00467547	0.00343712	0.00225803	0.00347499	0.00305644	0.00270522	0.0026705	0.00269408	0.00281563	0.00330656	0.00274903	0.00367989	0.00253637	0.00245155	0.00283939	0.00335931	0.00316937	0.00311492	0.00286392	0.00259889	0.00233334
G146	0.0147668	0.012029	0.0167698	0.0117759	0.0160752	0.00825857	0.0126065	0.0141938	0.0129067	0.0187568	0.0162288	0.0131179	0.012198	0.0121711	0.0149707	0.0139549	0.0163735	0.0139302	0.0119734	0.0127194	0.0102373	0.0124942	0.0123339	0.0104739	0.013173	0.012843	0.0124729	0.0116442	0.00736983	0.00917635	0.0154195	0.012832	0.0130277	0.0124808	0.0101638	0.0167223	0.00892285	0.0101528	0.0106307	0.0115925	0.0121552	0.0124922	0.0144041	0.0140531	0.012151	0.012559	0.0129065	0.0119471	0.0138755
G147	0.0027085	0.00222466	0.00266286	0.00239691	0.00316343	0.00341544	0.00276437	0.00246567	0.00254066	0.0027428	0.00236429	0.00310641	0.00285888	0.00268155	0.00238077	0.00246191	0.00282987	0.00263673	0.00246457	0.00270389	0.00305989	0.00308302	0.00265153	0.00262463	0.0022674	0.00276482	0.00272739	0.00294603	0.00352727	0.00276541	0.00252894	0.00275674	0.00280843	0.00281969	0.00343319	0.0022953	0.00265461	0.00321027	0.00287364	0.00320849	0.00231207	0.00263595	0.00272963	0.00325022	0.00284497	0.00287536	0.00304078	0.00279806	0.00244278
G148	0.00129741	0.00138801	0.00144724	0.000942143	0.0012603	0.001355	0.00113265	0.00114177	0.00107713	0.00151158	0.00113166	0.00135555	0.00123152	0.00117111	0.00112073	0.000994159	0.0010204	0.00154057	0.00119681	0.00121188	0.00101681	0.00157826	0.00104965	0.0011579	0.00114664	0.0015003	0.000977482	0.00118734	0.00131737	0.00129125	0.00130693	0.00117092	0.00117002	0.00112189	0.00193827	0.00119936	0.00112952	0.00141746	0.00149676	0.00127199	0.00101584	0.00111761	0.00131699	0.000996771	0.00133574	0.00144064	0.0013238	0.00134399	0.00110885
G149	0.0144227	0.0111692	0.0134197	0.0125223	0.0143247	0.01135	0.0133576	0.0145285	0.0149272	0.0142691	0.0105667	0.00896588	0.0116204	0.0121107	0.0118879	0.012016	0.0131911	0.0119652	0.0133258	0.0106303	0.012238	0.0126792	0.00918938	0.0125095	0.0145653	0.0128108	0.0120428	0.011634	0.0076143	0.0102387	0.0126977	0.0108561	0.0120876	0.0119546	0.0115916	0.0115722	0.0124396	0.0102382	0.0105256	0.0116326	0.013545	0.0144	0.0121587	0.0110763	0.011003	0.0108808	0.0117669	0.0121627	0.0130764
G150	0.00258017	0.00208566	0.00221233	0.00215372	0.00231764	0.00275134	0.00227586	0.00209161	0.00222114	0.00234272	0.00180503	0.00234059	0.00249377	0.00225255	0.00190536	0.00228989	0.00239418	0.00237359	0.00212157	0.00199732	0.00242347	0.00255493	0.00230049	0.00207973	0.00195879	0.00276528	0.00237901	0.00218236	0.00266567	0.00233192	0.00226072	0.00276094	0.00195895	0.00210913	0.00248067	0.00189003	0.00236791	0.00250656	0.00258892	0.00243175	0.00224828	0.00239121	0.00228473	0.00226985	0.00232508	0.00208832	0.00203609	0.00261161	0.00247751
G151	0.0028572	0.00268281	0.00246824	0.00296936	0.00321407	0.00391605	0.00242344	0.00249259	0.00243654	0.00335801	0.00263399	0.00310649	0.00374073	0.00223671	0.0025505	0.00277889	0.00284378	0.00305117	0.00295499	0.00257383	0.00348326	0.00347207	0.00351586	0.00333883	0.00266474	0.0026927	0.00317682	0.00272973	0.00421868	0.00283214	0.00223142	0.00294861	0.00315394	0.00314973	0.00380092	0.00263392	0.00290025	0.00411209	0.00341235	0.00270816	0.00237024	0.00367792	0.00289575	0.00299302	0.00390561	0.00261478	0.00348918	0.00251759	0.00227606
G152	0.00336291	0.00120317	0.000901258	0.000772404	0.00138481	0.000770935	0.000652988	0.00109731	0.000764235	0.00127134	0.00523601	0.000738291	0.00109109	0.00153016	0.000789873	0.000884417	0.000989107	0.000819592	0.000851043	0.0013312	0.00137437	0.000737859	0.000934358	0.000590002	0.00096319	0.00193987	0.00102103	0.000833503	0.00081739	0.000799281	0.000949725	0.000892445	0.00062417	0.000689234	0.000731346	0.00249788	0.00145447	0.00073435	0.00067571	0.000943012	0.000675055	0.00086319	0.000870728	0.00654926	0.000646293	0.00125854	0.000745358	0.000812631	0.000863661
G153	0.00073035	0.000544413	0.000750585	0.000612859	0.000880872	0.000866159	0.000767512	0.000650069	0.000586039	0.000887571	0.000680762	0.000784541	0.00108029	0.00071746	0.000898659	0.000668848	0.000636978	0.000728947	0.000833089	0.000559387	0.000776247	0.000994874	0.000849611	0.000772393	0.000750359	0.000881786	0.00074298	0.00098838	0.000616184	0.00076999	0.00065691	0.000711073	0.000658116	0.000663192	0.00101797	0.000858854	0.000750712	0.00082378	0.00106943	0.000878886	0.000618575	0.000816835	0.000643753	0.000537099	0.000952511	0.00102362	0.000874491	0.000934599	0.000759073
G154	0.00232704	0.00280599	0.00321809	0.0025382	0.00322762	0.00344284	0.00205584	0.00326134	0.00275387	0.00360103	0.00271939	0.00275702	0.00366244	0.00345018	0.00262646	0.00277617	0.00291667	0.00287169	0.0030328	0.00295238	0.00259461	0.00365708	0.00197312	0.00228537	0.00283132	0.00399358	0.00197162	0.00337487	0.00277952	0.00341776	0.00313041	0.00297998	0.00249618	0.00250679	0.00421767	0.00271497	0.00287244	0.00339942	0.00360171	0.00224292	0.00223966	0.00355223	0.00259411	0.00259148	0.00347126	0.00349712	0.00271592	0.00397007	0.00292002
G155	0.22373	0.0727299	0.0304926	0.0419873	0.077556	0.0409741	0.23083	0.0310041	0.0538717	0.0400467	0.0374443	0.0619789	0.03363	0.0357613	0.0571954	0.0370128	0.0582997	0.0500784	0.0366804	0.0485213	0.064718	0.0313423	0.0553978	0.0654035	0.0587202	0.077822	0.0753406	0.0519642	0.094554	0.0441564	0.0528791	0.28664	0.058496	0.0660175	0.054875	0.0505667	0.0306081	0.0449529	0.0527261	0.0425565	0.0455335	0.0387703	0.0621213	0.0356018	0.0322765	0.0451659	0.0697609	0.0426749	0.0374419
G156	0.00159136	0.00163582	0.00145291	0.00152927	0.00164953	0.00181174	0.00147112	0.00135285	0.00150181	0.00156248	0.00144467	0.00134574	0.00167302	0.0015967	0.0015591	0.00139025	0.0015934	0.00170439	0.0015657	0.00145012	0.00178261	0.00162666	0.00163023	0.00161333	0.00133932	0.00169857	0.00184018	0.00166583	0.00183906	0.00160494	0.00147338	0.00181297	0.00154984	0.00161754	0.00173911	0.00138524	0.00168138	0.00165243	0.00157579	0.00147189	0.00144312	0.00179727	0.00150942	0.0015869	0.00154906	0.00158872	0.00159936	0.00162377	0.00158466
G157	0.00171686	0.00232885	0.00272627	0.00208634	0.00254805	0.00285527	0.00215187	0.00226599	0.00256389	0.00267774	0.00240042	0.00282484	0.00304853	0.00285462	0.00211961	0.00232314	0.00245926	0.00268949	0.00230363	0.00238305	0.00255531	0.00330146	0.00225469	0.00262293	0.00218885	0.0029401	0.00226515	0.00281075	0.00325554	0.00282279	0.00232611	0.00273984	0.00257135	0.00247159	0.0031058	0.00259237	0.00233088	0.00346009	0.00328626	0.00263143	0.00222018	0.00266963	0.00237612	0.0025681	0.00317146	0.00278318	0.00270417	0.00283802	0.00236498
G158	0.00101936	0.000725188	0.000800124	0.000740379	0.000748061	0.00101439	0.000684168	0.000770774	0.000805943	0.000704816	0.00064983	0.00100286	0.000871474	0.000995134	0.000758079	0.000806262	0.000758809	0.000775488	0.000910834	0.000956757	0.000796744	0.000861763	0.00113513	0.000945186	0.000766611	0.000615671	0.000780168	0.000735605	0.000910947	0.00073468	0.00100519	0.000570879	0.000912165	0.00110057	0.000760188	0.000731063	0.000772426	0.00101238	0.000967291	0.00065492	0.000737205	0.000844792	0.000860836	0.000791972	0.00078206	0.000783404	0.000951912	0.000742267	0.00066524
G159	0.00319037	0.00208893	0.00285415	0.00110524	0.0018452	0.000675857	0.00135299	0.00229609	0.00162964	0.00228964	0.00157166	0.00122569	0.00137361	0.00136205	0.00205925	0.00139526	0.00122984	0.00137316	0.000941717	0.00180727	0.000780344	0.00166238	0.000949485	0.0013432	0.00130002	0.00176652	0.00138434	0.00117402	0.000797067	0.000717363	0.00142762	0.00141313	0.00122423	0.0013771	0.00154529	0.00242386	0.000830875	0.000659539	0.00147101	0.000942405	0.00170831	0.00192399	0.00166792	0.00194643	0.00100776	0.00139626	0.00123349	0.00130113	0.00170746
G160	0.0305637	0.0186373	0.0199694	0.0170935	0.020072	0.0116019	0.0207862	0.0143778	0.0168471	0.020638	0.0138244	0.012699	0.0159539	0.015658	0.0219674	0.0122188	0.0167746	0.0115251	0.0135086	0.0127781	0.0146066	0.0125985	0.0154438	0.0220139	0.0155553	0.0176222	0.017797	0.0128593	0.024433	0.0117487	0.015438	0.0145234	0.00945222	0.0178784	0.0188588	0.0121979	0.0113664	0.00698034	0.012224	0.0182939	0.0141404	0.0200557	0.0195594	0.0146397	0.0168677	0.0142304	0.0108292	0.0128883	0.0206177
G161	0.00135342	0.00157525	0.00175788	0.00152826	0.00119118	0.00162864	0.00132353	0.00117259	0.00164187	0.00129128	0.00106767	0.00174849	0.00173597	0.00172489	0.00166507	0.00126289	0.00167425	0.00192868	0.001742	0.00167663	0.0014441	0.00156094	0.00123763	0.00150146	0.00147149	0.00177267	0.00177345	0.0018433	0.0018973	0.00167977	0.00174723	0.00143161	0.002038	0.00120564	0.00171679	0.00141257	0.00182526	0.00189923	0.00259226	0.0011738	0.00160233	0.00192609	0.00116411	0.00135119	0.0021353	0.00165806	0.0017475	0.00170459	0.00158702
G162	0.00926706	0.0109882	0.0080857	0.00543674	0.00614281	0.00286112	0.00665766	0.00594042	0.00520385	0.0178297	0.00931474	0.0050579	0.00353759	0.00503103	0.00529623	0.00757347	0.00492843	0.00273501	0.00469509	0.00546935	0.00228468	0.00621622	0.00535163	0.00371436	0.00411758	0.0055102	0.00462215	0.00460768	0.00496399	0.00326464	0.0038182	0.00319699	0.00324526	0.00425918	0.00459532	0.00530633	0.00217209	0.00340108	0.0047711	0.00478051	0.00405567	0.00547519	0.00514527	0.00647097	0.00378295	0.00529152	0.00371943	0.0049935	0.00733961
G163	0.00282539	0.00336619	0.00354863	0.00363995	0.00314747	0.00421062	0.00339483	0.00323548	0.00313898	0.0035662	0.00279627	0.00370735	0.00446124	0.00395153	0.00294095	0.00283957	0.00370025	0.00416125	0.0034433	0.00367287	0.00362376	0.00405633	0.00341869	0.00357479	0.00277186	0.0041532	0.003712	0.00423901	0.00488061	0.00400985	0.00344735	0.0042276	0.00362158	0.0033853	0.00600134	0.0029274	0.00307417	0.00468066	0.00384202	0.00316403	0.00286893	0.00456483	0.00326792	0.0037048	0.00392886	0.00359437	0.00366414	0.00335217	0.00343303
G164	0.0195561	0.014368	0.00860542	0.0202481	0.0142148	0.0110233	0.0194793	0.014429	0.0142066	0.0132831	0.015939	0.0133481	0.00961208	0.0115616	0.0179791	0.0112937	0.0147726	0.0157058	0.0148644	0.0244527	0.0205392	0.0115603	0.0202958	0.0187764	0.0131889	0.0156083	0.0183529	0.0148415	0.0345646	0.0108978	0.0110361	0.0226719	0.0105239	0.0170834	0.0120261	0.0103253	0.0127681	0.0102417	0.013924	0.0173546	0.0116784	0.0152309	0.0182278	0.0208159	0.0120099	0.0132711	0.0139503	0.0105591	0.0199073
G165	0.000823362	0.000770169	0.000845249	0.00091882	0.000739091	0.000849766	0.00068155	0.000796612	0.000791653	0.000837982	0.000654308	0.000817212	0.000923478	0.000932571	0.000891512	0.000790949	0.000763604	0.000790241	0.000867042	0.000780489	0.000964522	0.000928957	0.000758381	0.000859836	0.000787737	0.000826377	0.000710343	0.000783025	0.000805706	0.000951933	0.000862601	0.000734907	0.00085467	0.000749023	0.00102265	0.000677432	0.000892835	0.000871917	0.000838683	0.000896983	0.000803345	0.000832073	0.000743652	0.000746182	0.000824144	0.000997291	0.000839565	0.000749289	0.00083564
G166	0.00801419	0.00627392	0.00542253	0.00753627	0.00695381	0.00409087	0.00683916	0.00899394	0.00944564	0.00949756	0.00770712	0.00666983	0.00551471	0.00654918	0.00643559	0.00850057	0.00577141	0.0056191	0.00762786	0.00754697	0.00558485	0.0075626	0.00447525	0.00656956	0.00630427	0.00477226	0.0065625	0.00463318	0.00194409	0.00610808	0.00924494	0.0072797	0.00688931	0.00600337	0.00572375	0.00969159	0.00768811	0.00665513	0.00618388	0.0100866	0.00911732	0.00608985	0.00730202	0.00488807	0.00584217	0.00686335	0.00892188	0.00709063	0.00762368
G167	0.00352983	0.00355914	0.00310892	0.00263082	0.00320821	0.00314904	0.00359868	0.0032058	0.00372765	0.00376947	0.00363955	0.00484511	0.0028871	0.00312363	0.00358123	0.00299547	0.00322628	0.00289975	0.0033494	0.00417731	0.00308967	0.00330858	0.00333739	0.00329077	0.00352439	0.00320827	0.00299228	0.00317868	0.00641716	0.003009	0.0032429	0.00384794	0.00319563	0.00357396	0.00331439	0.0032979	0.00316681	0.00347953	0.0044661	0.00363241	0.0039712	0.00265492	0.00477786	0.00367618	0.00288302	0.00251368	0.00449154	0.00318028	0.00385769
G168	0.0322814	0.00709352	0.00356635	0.00615904	0.0107364	0.00608652	0.0446462	0.00502413	0.00826983	0.00592892	0.00789338	0.0136317	0.00456757	0.00631634	0.0118589	0.00744878	0.0108643	0.00680344	0.00770572	0.0038372	0.00807982	0.00549846	0.00777328	0.00689253	0.00728438	0.00851166	0.00924325	0.00947829	0.0153296	0.00573519	0.0037702	0.0434359	0.00598367	0.0131637	0.00419808	0.010498	0.00423799	0.00559165	0.0110672	0.00730486	0.00746523	0.00404618	0.00784512	0.00460464	0.00655482	0.00668303	0.0115978	0.00721671	0.00655991
G169	0.0708279	0.0199163	0.00609388	0.014873	0.0176245	0.00991235	0.086495	0.0128881	0.0133701	0.0252428	0.0097298	0.0132936	0.00529519	0.0135638	0.0170272	0.0120519	0.0231078	0.0140175	0.00882242	0.00681569	0.0157484	0.00533424	0.0222681	0.0162748	0.0236983	0.0128713	0.0183682	0.0164647	0.0348404	0.0104948	0.00951339	0.0716463	0.00993849	0.0141804	0.00858647	0.00822887	0.00704087	0.00666357	0.00816247	0.010881	0.00940737	0.0147889	0.0118252	0.0106651	0.0105617	0.0157311	0.0114026	0.0143098	0.01312
G170	0.00321865	0.00380155	0.00380731	0.00291357	0.0042977	0.00447112	0.00268054	0.00367261	0.00390787	0.00416113	0.00419523	0.00409176	0.00505947	0.00468435	0.00282025	0.00385978	0.00396728	0.00342392	0.00315309	0.00334187	0.00282403	0.00526154	0.00370304	0.00299846	0.00446542	0.00381644	0.00277412	0.00431095	0.00463316	0.00477148	0.00367629	0.00423455	0.00360848	0.00373852	0.0051291	0.00380528	0.00314601	0.00469757	0.00484939	0.00465009	0.00327434	0.00392628	0.00382076	0.00416854	0.0041864	0.005337	0.00389281	0.00559141	0.00418183
G171	0.000895574	0.000805367	0.00108838	0.000916456	0.000969441	0.00105994	0.00104296	0.000858757	0.000937339	0.00104154	0.000888344	0.000941706	0.000991363	0.00106231	0.000942074	0.000985304	0.000929666	0.000950118	0.00100626	0.000824975	0.00100493	0.00118607	0.000841556	0.00107851	0.000933427	0.0010249	0.00111435	0.00104552	0.000917564	0.000950045	0.000937715	0.00101676	0.000885976	0.000772938	0.000939009	0.00102196	0.000837928	0.000991516	0.0010613	0.000818273	0.000871076	0.00103862	0.00083153	0.000830622	0.0010535	0.00103143	0.00105336	0.00116487	0.000800924
G172	0.00156816	0.00155247	0.00166649	0.00192011	0.00161075	0.00148558	0.00179993	0.00141414	0.00161721	0.00188281	0.00158785	0.00185214	0.00206473	0.00204477	0.00189066	0.00152959	0.00215881	0.00195946	0.00175773	0.00185973	0.00179456	0.00219211	0.00189878	0.00218932	0.00158684	0.00234574	0.00217102	0.00239985	0.00203989	0.00161501	0.00175869	0.00190084	0.00185038	0.00190468	0.00216349	0.00178576	0.00166552	0.0022224	0.00262029	0.00115198	0.00161195	0.00195336	0.0013711	0.00169934	0.00196311	0.00182377	0.00197082	0.00173511	0.00158219
G173	0.0253896	0.0204097	0.016718	0.0191703	0.0187847	0.0153006	0.0193424	0.0214151	0.0207983	0.0185165	0.0183476	0.0197633	0.0153378	0.0200294	0.0227991	0.0194288	0.0203109	0.0184361	0.0179979	0.0152957	0.0202052	0.0172585	0.0195087	0.0199778	0.0201537	0.0199668	0.0208027	0.0189718	0.0172853	0.0167051	0.0191238	0.0186007	0.0195953	0.019445	0.0160977	0.0207067	0.0190199	0.0166751	0.0198186	0.019481	0.0185944	0.0180688	0.0199696	0.0209205	0.0178576	0.0183023	0.019456	0.0188157	0.0230103
G174	0.00110773	0.00111222	0.00113096	0.000706514	0.00102095	0.00136879	0.00108787	0.00105604	0.00117049	0.00169801	0.00116029	0.00144062	0.00141657	0.00131471	0.00124065	0.00102989	0.00113194	0.000994059	0.00120096	0.00108031	0.00115843	0.0013645	0.00127666	0.00105252	0.00132449	0.00120922	0.000981147	0.00105133	0.00101081	0.00142648	0.00123818	0.001364	0.0010467	0.00117042	0.00140905	0.0016604	0.00138025	0.0011286	0.00134688	0.00143724	0.00148651	0.00095162	0.00122445	0.000987444	0.00220458	0.00129361	0.00111449	0.00132177	0.0010789
G175	0.000629321	0.000610393	0.000607067	0.000614306	0.000607892	0.000688206	0.000606114	0.000595508	0.000601301	0.000686891	0.000543472	0.00063867	0.00065443	0.000612	0.000668676	0.000580315	0.000656238	0.000657928	0.000595758	0.000590247	0.000688815	0.000662507	0.000616218	0.000642075	0.000578999	0.000665084	0.000640799	0.000701786	0.000714611	0.00063026	0.000546282	0.000600676	0.000655094	0.000617145	0.000711758	0.00058241	0.000597051	0.000737131	0.000723014	0.000581293	0.000549478	0.000710927	0.000597445	0.000619794	0.000679271	0.000646129	0.000581476	0.000650349	0.000593512
G176	0.000915448	0.00119091	0.00118255	0.0010188	0.00108675	0.00123835	0.00105671	0.00115448	0.00125293	0.00138887	0.00124764	0.00111203	0.00132361	0.00109711	0.00102029	0.0011095	0.00102501	0.00125487	0.00109788	0.00113802	0.000971636	0.00146623	0.00130046	0.000739172	0.000995879	0.00122121	0.00109821	0.00124982	0.000920637	0.0014592	0.00118214	0.00122914	0.00114073	0.00110481	0.00119938	0.00141162	0.00108053	0.00146447	0.00133382	0.00117399	0.00109994	0.00116945	0.000986445	0.00112361	0.00125888	0.00123827	0.00119658	0.00134573	0.00104721
G177	0.000695172	0.000714316	0.0007654	0.000735232	0.000728939	0.000784571	0.000629804	0.000631719	0.000728314	0.000680143	0.000750636	0.0007085	0.000805766	0.000727175	0.000803977	0.000677837	0.000648089	0.000744277	0.000655961	0.00068964	0.000734077	0.000818184	0.000769553	0.000704051	0.00063448	0.000740973	0.000699958	0.000724242	0.000699313	0.000804403	0.000650987	0.000661353	0.000713783	0.000596617	0.000789212	0.000726278	0.000630565	0.000862387	0.000777287	0.000746254	0.000644606	0.000885055	0.000691289	0.000641837	0.000782375	0.000725583	0.000710996	0.000722619	0.000653199
G178	0.00921653	0.00561489	0.00198908	0.0112277	0.00493124	0.0029015	0.00481835	0.00836202	0.00387067	0.00588836	0.00533614	0.00217601	0.00293886	0.00488542	0.00528464	0.00474166	0.00445932	0.00596742	0.00386733	0.00825139	0.00304026	0.00295771	0.0087666	0.00858285	0.00378366	0.00318268	0.00812214	0.00337449	0.00832218	0.00233741	0.00284603	0.0130374	0.00234582	0.00511093	0.00339509	0.00106497	0.0014573	0.00250374	0.00329466	0.00371467	0.00217465	0.00568874	0.00821449	0.0236284	0.00322251	0.0087689	0.00217186	0.00392121	0.0108005
G179	0.0015928	0.00142557	0.00151634	0.00159205	0.00156811	0.00148934	0.00153491	0.00157387	0.00148053	0.00157974	0.00104986	0.00182905	0.00172554	0.00152548	0.0013809	0.0013569	0.00154572	0.00205515	0.00166192	0.0016227	0.00203977	0.00170515	0.00118769	0.00211447	0.00114767	0.0014655	0.00152081	0.00170889	0.00201403	0.00154845	0.00135075	0.00180963	0.00148778	0.00138419	0.0018844	0.00102371	0.00165092	0.00158111	0.00176675	0.001434	0.00115015	0.00185205	0.00137107	0.0016156	0.00142312	0.00149779	0.00146054	0.00181485	0.00130549
G180	0.00657874	0.0032903	0.00308257	0.00325132	0.0036618	0.00337464	0.00676153	0.00299034	0.00322965	0.00308184	0.00346709	0.00432146	0.00324174	0.00323084	0.00409473	0.00285179	0.00440959	0.00315862	0.00334536	0.00401884	0.00389676	0.00328549	0.00395806	0.00367266	0.00303067	0.00373725	0.00375936	0.00341374	0.00739324	0.00330633	0.0031307	0.0109304	0.00318644	0.00366057	0.00393602	0.0030323	0.00309114	0.00309674	0.00449413	0.00414879	0.00354806	0.00275996	0.00429461	0.00404221	0.00328981	0.00333831	0.00387938	0.00313212	0.00397047
G181	0.00181925	0.00227579	0.00239361	0.00194877	0.00225292	0.0023563	0.00177837	0.00218437	0.00217501	0.00274324	0.00200122	0.00246092	0.00230637	0.00234031	0.00194663	0.00176733	0.00207732	0.00210224	0.00267117	0.00240199	0.00179228	0.00282021	0.00193856	0.00267772	0.00186953	0.00245508	0.00170818	0.00263731	0.00253797	0.00310043	0.00193797	0.00274381	0.00217904	0.00213356	0.00256565	0.00176791	0.00185327	0.00259205	0.00305722	0.00221014	0.00213715	0.0022365	0.0022953	0.00201183	0.00264097	0.00241247	0.0020742	0.00224606	0.00185277
G182	0.0279951	0.0264857	0.0142485	0.0367445	0.0278114	0.0219297	0.0363961	0.0260454	0.0339825	0.0222314	0.0179885	0.0171096	0.0216176	0.0253581	0.0267664	0.0225667	0.0259205	0.0335277	0.024287	0.0419812	0.0299161	0.0198728	0.0319191	0.0281985	0.0321954	0.0255515	0.0332616	0.0251431	0.0344692	0.0239822	0.0211497	0.0284125	0.0265961	0.0254224	0.0306551	0.00962666	0.0331829	0.0235007	0.0206736	0.0253918	0.0251665	0.033978	0.0236991	0.0383093	0.0256595	0.0323185	0.0197184	0.0246627	0.030879
G183	0.0036418	0.00361969	0.00376912	0.00363862	0.00415549	0.00444119	0.00308987	0.00359679	0.003094	0.00301577	0.00303833	0.00431544	0.00379606	0.00353598	0.00379942	0.00312457	0.00335218	0.0033318	0.00332546	0.00388015	0.00414644	0.00391459	0.00357065	0.00446445	0.00366583	0.00422237	0.00424525	0.00382767	0.00463724	0.00379444	0.00381064	0.00365424	0.00362261	0.0036984	0.00393396	0.00353114	0.00340548	0.00411555	0.00402565	0.0043571	0.00351407	0.00377044	0.00339754	0.00359905	0.00341782	0.00345759	0.00406683	0.00311172	0.00368961
G184	0.000689076	0.000618127	0.000524802	0.000792659	0.000585031	0.000764622	0.000670653	0.000463477	0.000509927	0.0005669	0.000501094	0.000644049	0.000592706	0.000652071	0.000684533	0.000602336	0.000626606	0.000773351	0.000579207	0.000603638	0.000590369	0.000620809	0.00062699	0.000775821	0.000502075	0.00066161	0.000641643	0.00079259	0.000638519	0.000661491	0.000606563	0.000558763	0.000560969	0.000536363	0.000700979	0.000547541	0.000561833	0.000633425	0.000640979	0.000497239	0.000605975	0.000688734	0.000545734	0.000620358	0.000668793	0.000586148	0.000583571	0.000603155	0.000651027
G185	0.00145849	0.00109362	0.0012318	0.00140098	0.00136449	0.00143639	0.00134619	0.00113249	0.0012908	0.000992092	0.0010365	0.00144514	0.00137736	0.00127022	0.00152669	0.00120644	0.0013442	0.00131909	0.00137363	0.00139585	0.0015104	0.00124094	0.00168768	0.00172641	0.00101494	0.00140886	0.00154933	0.00146631	0.00194958	0.0014797	0.00122518	0.00132795	0.00151206	0.00136261	0.00130964	0.0010543	0.0013895	0.00127317	0.0013742	0.00137343	0.00122423	0.00124335	0.00126583	0.00158343	0.00167349	0.00127204	0.0014548	0.00109877	0.00119668
G186	0.00330893	0.00353596	0.0040966	0.00274065	0.00334519	0.00426979	0.00409432	0.00370371	0.00337402	0.0040459	0.00310144	0.00328249	0.00422843	0.00362479	0.00330004	0.00304869	0.00286229	0.00329708	0.00299372	0.00308735	0.00291497	0.00327218	0.00385762	0.0035838	0.00364191	0.00356417	0.00372352	0.00347791	0.00404953	0.00416021	0.0032792	0.00481214	0.00318089	0.00305942	0.00418625	0.00351448	0.00329316	0.0043525	0.00299255	0.00342139	0.00338578	0.00393192	0.00333822	0.00359498	0.00354069	0.00323282	0.00363343	0.00336435	0.00353007
G187	0.00822701	0.00542209	0.00599699	0.0101077	0.00878306	0.00280234	0.0128125	0.00655624	0.0078649	0.00650188	0.00504026	0.00302148	0.00531968	0.00494173	0.0089888	0.00496175	0.00734429	0.00532471	0.00740825	0.00815948	0.00737811	0.00475	0.0053526	0.00738839	0.00498287	0.00582033	0.0121829	0.00439396	0.00479939	0.0045455	0.00736478	0.00728269	0.00409991	0.0049074	0.00791054	0.00149717	0.00643596	0.00276013	0.00355384	0.0067062	0.00618546	0.00943344	0.00395122	0.00565759	0.00703595	0.00543804	0.00349959	0.00443933	0.0061484
G188	0.00291945	0.00228339	0.00328528	0.00269504	0.00283165	0.0033472	0.0026027	0.00335629	0.00303352	0.00291194	0.00290925	0.00285058	0.00357327	0.00307392	0.00263059	0.00265812	0.00309555	0.00305831	0.0027323	0.00313183	0.00295096	0.00377051	0.00291197	0.00254273	0.0026972	0.003105	0.0026319	0.00323622	0.00293662	0.00327191	0.00331889	0.0036879	0.00269066	0.00249014	0.00387827	0.00273283	0.00277964	0.00395336	0.00370129	0.00311266	0.00253496	0.00341472	0.0028404	0.00288535	0.00310859	0.00291304	0.00307629	0.0030971	0.00268245
G189	0.0125415	0.00529299	0.00624416	0.00498735	0.00921979	0.00332837	0.00784218	0.00602947	0.00446395	0.22967	0.00796355	0.0268896	0.00344021	0.00879887	0.00412502	0.00633922	0.00690277	0.00824854	0.00275278	0.00974791	0.00208367	0.00355444	0.00544736	0.00516723	0.0050508	0.00477027	0.00436356	0.0056782	0.00237461	0.00247662	0.020508	0.00518606	0.00280388	0.00662863	0.0033274	0.00765362	0.0016859	0.0016202	0.00434673	0.00515659	0.00600868	0.00881921	0.0077257	0.00708521	0.0300154	0.00597066	0.00480593	0.00468425	0.0106919
G190	0.00062521	0.000707482	0.000675203	0.000689232	0.000698274	0.000650684	0.000757408	0.000713848	0.000712633	0.000761439	0.00072098	0.000640603	0.000695655	0.000721471	0.000701971	0.000773625	0.000665732	0.000825245	0.000750361	0.000662867	0.000907475	0.000737279	0.000699425	0.000798673	0.000714753	0.000794864	0.000694691	0.000698049	0.000946493	0.000744361	0.000633973	0.000808774	0.000706841	0.000693355	0.000781943	0.000620711	0.000626337	0.000769604	0.000754688	0.000848036	0.000664133	0.000644335	0.000715751	0.000698873	0.000674643	0.0007638	0.00065593	0.000719557	0.000729912
G191	0.000615928	0.000656479	0.0006611	0.000636472	0.000658036	0.000882674	0.000658271	0.000806964	0.000628106	0.000705525	0.000563888	0.000620147	0.00069051	0.000613488	0.000623232	0.000562143	0.000628295	0.000798294	0.000606901	0.000675107	0.000786965	0.000622443	0.000742076	0.000698794	0.00070525	0.000763053	0.000816163	0.000771341	0.000756463	0.000746478	0.000676489	0.000736416	0.000631717	0.000684024	0.000626565	0.000581305	0.000570589	0.000605173	0.000740281	0.000893607	0.000508886	0.00075359	0.000676292	0.000685799	0.000691927	0.000626011	0.000601955	0.00059592	0.000569965
G192	0.0731343	0.0719561	0.0371965	0.0703606	0.0613812	0.0548438	0.0801953	0.0626011	0.0531938	0.0667371	0.0766156	0.0532868	0.0472105	0.058898	0.0631038	0.0632063	0.063333	0.0693563	0.0530583	0.069454	0.0712292	0.0542648	0.0742581	0.0696333	0.0723046	0.0613332	0.0634653	0.0760073	0.0845437	0.0483752	0.0453072	0.0889693	0.0513836	0.0779008	0.055641	0.0749266	0.0644991	0.0608753	0.0494962	0.0708878	0.0660161	0.0516031	0.0762775	0.0819616	0.0405132	0.0669335	0.0448504	0.0602469	0.0703372
G193	0.00418159	0.0049165	0.00452969	0.0045573	0.00444409	0.0057132	0.00373803	0.00439161	0.00387897	0.00376166	0.00394129	0.0054215	0.00482401	0.00467192	0.00595818	0.00356445	0.0052934	0.00467386	0.00505726	0.00635114	0.005296	0.00447041	0.00487555	0.00535454	0.00382383	0.00477117	0.00485421	0.00538577	0.00658567	0.00455103	0.00402515	0.00361258	0.00565462	0.00415209	0.00502523	0.00340372	0.00447101	0.00558903	0.00580349	0.00441436	0.00385207	0.0051399	0.00482834	0.00492739	0.00405332	0.00415996	0.00590142	0.00387267	0.00414564
G194	0.00952728	0.0107317	0.0148038	0.00877348	0.00989814	0.00667451	0.0135429	0.00916924	0.0106542	0.0156824	0.0135909	0.00779033	0.00841719	0.0102559	0.00986669	0.0112498	0.0104731	0.0101569	0.0100227	0.00876329	0.00712556	0.00960448	0.00823746	0.00655646	0.0118283	0.0103262	0.00778819	0.010956	0.00514843	0.00755457	0.0156214	0.0126818	0.00832143	0.0114473	0.00965293	0.00972284	0.00773033	0.00640921	0.00897395	0.00899778	0.0105618	0.0108306	0.00936057	0.00829837	0.00823642	0.0101207	0.00950538	0.0118117	0.0113468
G195	0.00120157	0.00151365	0.00142884	0.00157914	0.00143317	0.00196066	0.00138946	0.00150661	0.00141908	0.00142332	0.00127151	0.00151873	0.00190722	0.00159421	0.00108436	0.0012488	0.00179146	0.00147831	0.00154915	0.00136171	0.00150129	0.00188555	0.00159992	0.00140271	0.00123949	0.00176391	0.0013599	0.00153273	0.00153517	0.001774	0.00149554	0.00137001	0.00145245	0.0012286	0.00203221	0.00183894	0.00148925	0.0017206	0.00187936	0.00137162	0.00128722	0.00140379	0.00119806	0.00138961	0.00144232	0.00156954	0.00150197	0.00171474	0.00140602
G196	0.0010744	0.000598513	0.00107506	0.000726222	0.000747026	0.000881433	0.000589534	0.000419069	0.000705235	0.000851735	0.000716937	0.00074796	0.000681054	0.000687078	0.000766186	0.00049793	0.000802583	0.000701565	0.000719678	0.000715283	0.00103303	0.00102815	0.000653498	0.000713238	0.000610895	0.000918004	0.000691074	0.000928177	0.000639512	0.000815972	0.000738145	0.000784698	0.000807122	0.00074759	0.0007857	0.000586773	0.000616963	0.000757499	0.000766259	0.000627928	0.000682717	0.000789986	0.000660847	0.000625485	0.00069428	0.000797839	0.000755273	0.00081163	0.000701207
G197	0.000625784	0.000710797	0.000704923	0.000659977	0.00065689	0.000787922	0.000628052	0.000577897	0.000608193	0.000801537	0.000531995	0.000789281	0.000704969	0.000951095	0.000679085	0.000644248	0.000877898	0.000631666	0.000740836	0.000553808	0.000609525	0.00108809	0.000765788	0.000573651	0.000623373	0.00066124	0.00073915	0.000715858	0.000951132	0.00067545	0.000754762	0.000601271	0.000649416	0.000647202	0.000983016	0.00068421	0.000713845	0.000818059	0.000840048	0.000787317	0.00064597	0.000686971	0.00055957	0.000745789	0.000717181	0.000787623	0.000982255	0.000851021	0.000732828
G198	0.000837359	0.000726612	0.00133531	0.000470236	0.000423488	0.00057882	0.000607241	0.000395081	0.000433833	0.0061932	0.000988321	0.00152071	0.00116474	0.000512112	0.00192185	0.00056061	0.00093219	0.00179933	0.000612317	0.000674259	0.000570329	0.00075288	0.000777269	0.00074103	0.000909813	0.00105534	0.000841931	0.00112247	0.000631749	0.000693628	0.00107651	0.000597808	0.000803932	0.00114272	0.000640348	0.000488742	0.000462519	0.000573757	0.000644824	0.00082373	0.000859665	0.000567136	0.00108775	0.00158614	0.001332	0.000855602	0.000505122	0.000646716	0.000545403
G199	0.00143342	0.00197065	0.0012844	0.00103268	0.000939944	0.00136994	0.00110845	0.00136867	0.00169638	0.000834662	0.000712171	0.000660649	0.000528315	0.00125801	0.00127575	0.00140529	0.00117064	0.00118736	0.000912539	0.00116181	0.000464293	0.000983726	0.000671362	0.000773265	0.000903872	0.00140347	0.00108532	0.000709401	0.000557715	0.000949241	0.00134395	0.00141927	0.000867044	0.00122778	0.000946378	0.00134275	0.00123446	0.000837557	0.000934739	0.00115908	0.00106755	0.00101659	0.00150112	0.000699604	0.000662309	0.000824969	0.00126222	0.0016902	0.0011875
G200	0.00120908	0.001215	0.00203751	0.00168595	0.0017014	0.00163471	0.00141158	0.00132809	0.00220558	0.00205507	0.00122905	0.00176474	0.00196035	0.00148735	0.00131166	0.00129541	0.00192407	0.00176097	0.00131366	0.00160278	0.00196224	0.0018301	0.00150327	0.00157634	0.0010141	0.00160218	0.00112398	0.00170197	0.00156082	0.00165887	0.0015626	0.00130681	0.00154617	0.00121072	0.00236692	0.00145343	0.00130615	0.00190412	0.00177738	0.00118176	0.00154814	0.00172511	0.00128302	0.00164009	0.00194355	0.00176937	0.00164274	0.00163722	0.00148312
G201	0.0014628	0.00174533	0.00204576	0.001653	0.00174533	0.00190548	0.00171495	0.00166967	0.00169448	0.00213408	0.00146869	0.00240302	0.00210713	0.00241231	0.00162117	0.0015422	0.00208403	0.0017923	0.00209163	0.00199612	0.00182063	0.00228223	0.0012486	0.00162268	0.00137469	0.00205523	0.00161157	0.00234689	0.00252808	0.002174	0.00185206	0.00226901	0.00201376	0.00184876	0.00226451	0.00193084	0.00152635	0.00273571	0.00211464	0.00174228	0.00173689	0.00216547	0.0017073	0.00154639	0.00217866	0.00251877	0.00194837	0.00233992	0.00170591
G202	0.000751697	0.00101553	0.00138737	0.0007419	0.00140089	0.0015624	0.00100982	0.00144068	0.00168455	0.00175664	0.00113917	0.00204863	0.00190734	0.00157439	0.000753093	0.00147164	0.00203943	0.00156942	0.00208903	0.00137699	0.000920688	0.00271103	0.000825925	0.0008648	0.00110324	0.00149602	0.000603062	0.00216134	0.00115182	0.00265294	0.00162807	0.000793071	0.00166112	0.00129237	0.00190797	0.00173284	0.00143113	0.00210214	0.00208515	0.00166222	0.0014967	0.00181814	0.00109068	0.00133347	0.00287289	0.00227323	0.00211335	0.00248165	0.00103023
G203	0.0715168	0.0116826	0.00705991	0.00814964	0.0244976	0.00735367	0.179204	0.00519652	0.0135085	0.0122222	0.00857408	0.015644	0.00425836	0.00702165	0.0127549	0.00759833	0.0190723	0.00799788	0.0100446	0.00377392	0.0130001	0.00591141	0.0115519	0.00944984	0.0189651	0.00889585	0.0144752	0.0147062	0.01096	0.00588714	0.0104216	0.18006	0.00849108	0.0155591	0.00688639	0.00754585	0.0053305	0.00484359	0.0118918	0.00751065	0.0076238	0.00455812	0.00843305	0.00441892	0.0071691	0.015014	0.0137516	0.0096843	0.00778038
G204	0.00282626	0.0029193	0.00337911	0.00267619	0.00325611	0.00325425	0.00298411	0.00278113	0.00248828	0.00322338	0.00316883	0.00357728	0.00349259	0.00255699	0.00265637	0.00254858	0.00297541	0.00325684	0.0028814	0.00410106	0.00331148	0.00388247	0.00307601	0.00299065	0.00347359	0.00400682	0.0024216	0.00308739	0.0045895	0.00395256	0.00295815	0.00322415	0.00325675	0.0032066	0.00418383	0.0029388	0.00348384	0.00399907	0.00372712	0.00281782	0.00314975	0.00330542	0.00318938	0.0032754	0.00382239	0.00353625	0.00367527	0.00250061	0.00288555
G205	0.023026	0.0113975	0.0122089	0.0142321	0.0116517	0.012521	0.0643254	0.00922141	0.0124628	0.00483384	0.0093043	0.00842347	0.0102323	0.010753	0.0126317	0.0121777	0.0135737	0.0103607	0.00799837	0.00525582	0.0158475	0.00885655	0.00895459	0.0131054	0.014356	0.00928682	0.0181113	0.0102244	0.0152047	0.0104447	0.0112732	0.0340854	0.00941951	0.0104158	0.00849309	0.0107433	0.0164464	0.00856522	0.00933406	0.0116303	0.00914036	0.0077362	0.00921789	0.00610754	0.0116785	0.0110263	0.00867038	0.00987745	0.00942894
G206	0.0100592	0.016834	0.0135364	0.0147214	0.0167165	0.0204397	0.0140397	0.0156023	0.013919	0.0140509	0.0195152	0.0143609	0.01652	0.0150135	0.0154486	0.013598	0.0143582	0.0146052	0.0156966	0.0191638	0.018461	0.0167797	0.015692	0.0160767	0.0190305	0.015563	0.0154481	0.0230412	0.0146206	0.0217701	0.0151388	0.0133123	0.0221698	0.014033	0.0188581	0.0142596	0.0284161	0.0200178	0.0141823	0.0173191	0.0183017	0.014102	0.0161149	0.0148753	0.0214689	0.0199335	0.0144933	0.0162775	0.0123173
G207	0.00283173	0.00275927	0.00319034	0.0028847	0.00319756	0.00427065	0.0028347	0.00290147	0.00299669	0.00314772	0.00235507	0.00310297	0.00359649	0.00325205	0.00268411	0.00276114	0.00332991	0.00332065	0.00309058	0.00303307	0.00356021	0.00394148	0.00294878	0.00289256	0.00290944	0.0036964	0.0029669	0.00312535	0.00377133	0.00330789	0.00290193	0.00325151	0.00324324	0.00286334	0.0037699	0.00279388	0.00292185	0.00364893	0.00347459	0.00262616	0.00294616	0.00370336	0.00277968	0.00287808	0.00353191	0.00293868	0.00277145	0.00322911	0.00274137
G208	0.000811139	0.000739628	0.000722455	0.000809584	0.000769188	0.000745523	0.000783814	0.000725551	0.000803483	0.000699461	0.000619206	0.000783207	0.000721467	0.000736919	0.000817759	0.000696176	0.000665624	0.000754561	0.000655148	0.000667467	0.000808667	0.000739355	0.000693623	0.000860801	0.000725632	0.000780747	0.000801121	0.000772875	0.000804514	0.000801485	0.000700982	0.000681939	0.000761624	0.000717311	0.000837066	0.00074503	0.000785437	0.000770961	0.000834136	0.000777804	0.000729498	0.000769804	0.000759501	0.000746404	0.000774026	0.000677043	0.000661213	0.000705763	0.00071325
G209	0.00202598	0.00207559	0.00258804	0.00267088	0.00229616	0.00312538	0.00203273	0.00219638	0.00227583	0.00258249	0.00203572	0.00217925	0.00294953	0.0024255	0.00237454	0.00216844	0.0024783	0.00277721	0.00201599	0.0023571	0.00196224	0.00295904	0.00198155	0.00211824	0.00206675	0.00245642	0.00225352	0.00224653	0.00236508	0.00242234	0.00262021	0.00259453	0.00242224	0.00240026	0.00303924	0.00236756	0.00260247	0.00282041	0.00289717	0.00260695	0.0022872	0.0027813	0.00212477	0.00226193	0.00287515	0.00231396	0.00245939	0.00238594	0.00230343
G210	0.0217071	0.00596089	0.00657513	0.00363215	0.0130279	0.00607458	0.0482099	0.00209646	0.00640192	0.00873184	0.00619024	0.00443871	0.00392019	0.00311432	0.00955764	0.00567276	0.0178889	0.00407901	0.00442062	0.00397228	0.00773606	0.00416856	0.00570477	0.00786308	0.00713706	0.00621953	0.00876405	0.00750799	0.0197847	0.00343422	0.00408157	0.0688854	0.00453463	0.00644415	0.00717513	0.0044269	0.00202783	0.00185547	0.00684063	0.00318793	0.00409825	0.00328197	0.00505167	0.00633537	0.00566873	0.006255	0.00457076	0.00615675	0.0078837
G211	0.00859153	0.00432628	0.0039941	0.0134804	0.00622764	0.00588776	0.00882311	0.00714992	0.00565826	0.0183885	0.0124408	0.00745608	0.00756755	0.0124968	0.0070663	0.00719615	0.0060973	0.00666718	0.00798014	0.00560212	0.00780707	0.0071311	0.0106101	0.00645047	0.0105653	0.00719583	0.0106563	0.0133747	0.00296215	0.014299	0.011009	0.00818695	0.00501054	0.0152727	0.00674473	0.0273689	0.026953	0.00346435	0.00594185	0.0147733	0.0221351	0.00452797	0.00635302	0.00652042	0.0150703	0.0187081	0.00264492	0.0138321	0.00545196
G212	0.134744	0.0834567	0.0673248	0.0782336	0.0745303	0.0829848	0.130426	0.0735231	0.0793658	0.0936837	0.0902144	0.101197	0.0717072	0.0675075	0.0896055	0.0693515	0.0922039	0.0795013	0.0812162	0.107739	0.06605	0.0824368	0.0949263	0.08052	0.0783888	0.0836206	0.0730421	0.091206	0.0957033	0.0884914	0.0731931	0.19605	0.0723849	0.0978491	0.0976302	0.0878211	0.0768731	0.085639	0.115301	0.090835	0.0772678	0.0743508	0.0984518	0.115373	0.0880863	0.089363	0.0969135	0.0738736	0.0851743
G213	0.00153891	0.00189149	0.0020223	0.00205021	0.00195811	0.00193599	0.00209618	0.00192885	0.00203999	0.00199695	0.00174315	0.00257168	0.00246043	0.00248535	0.00181244	0.00190631	0.00185294	0.00177303	0.00205974	0.00206025	0.00185803	0.00253832	0.00253765	0.00244343	0.00192324	0.00256043	0.00192245	0.00268061	0.002975	0.00236408	0.00236917	0.00213983	0.00217331	0.0020076	0.00240963	0.001932	0.00201548	0.00260614	0.00303086	0.00194983	0.00212976	0.00308621	0.00163115	0.00170981	0.0021544	0.00214556	0.00225313	0.00216354	0.00181745
G214	0.00750033	0.00275888	0.00218571	0.00207507	0.0023897	0.00214318	0.00895804	0.00215843	0.00319993	0.00215966	0.00188418	0.00342002	0.00270193	0.0022226	0.0043736	0.00216172	0.0022025	0.00235103	0.00222813	0.00292801	0.00279286	0.00287527	0.00251153	0.00211768	0.00265458	0.00333329	0.00230346	0.00282435	0.00331624	0.00280983	0.00247323	0.0112082	0.00218935	0.00248001	0.00290815	0.00214275	0.00202324	0.00246958	0.00304312	0.00341517	0.00297745	0.00202282	0.00230995	0.00179506	0.00197154	0.00246084	0.00337403	0.00218686	0.00254986
G215	0.000898825	0.00108002	0.00077778	0.00074217	0.000844006	0.0010463	0.000725666	0.000887113	0.00083639	0.00101845	0.000799079	0.000906205	0.000937159	0.00107438	0.000760445	0.000880803	0.00102653	0.00096514	0.000833684	0.000843876	0.00090671	0.000980122	0.00101768	0.000894447	0.000762868	0.000891267	0.000905987	0.000889375	0.000773045	0.000921002	0.000743007	0.000904454	0.000818539	0.000962423	0.00112152	0.000829578	0.000822579	0.000983402	0.000995253	0.000933897	0.000703113	0.00119627	0.000892742	0.000857136	0.000977346	0.000851174	0.000894582	0.000980283	0.000867983
G216	0.000680511	0.000732126	0.000729978	0.00071938	0.00081818	0.000964627	0.000696703	0.00067887	0.000724645	0.00078624	0.000649073	0.000803889	0.000918265	0.00097741	0.000673396	0.000665803	0.000775686	0.000829384	0.00082554	0.000693405	0.000883108	0.000775056	0.000778704	0.000739994	0.000656058	0.000824095	0.000687461	0.000884336	0.000912104	0.000858674	0.000695803	0.000757729	0.000748257	0.000686229	0.000871208	0.000680939	0.00062237	0.000817659	0.000886236	0.000749919	0.000699074	0.000839522	0.000638234	0.000770585	0.000740435	0.000701898	0.000742737	0.000759979	0.000589372
G217	0.000493944	0.000521331	0.000618363	0.000521186	0.0005598	0.000708196	0.000454317	0.000650219	0.000631516	0.000523107	0.000414175	0.000457383	0.000695869	0.000543751	0.000467512	0.00050231	0.000558047	0.000931957	0.000588796	0.000734693	0.000556831	0.000563079	0.000512042	0.00056822	0.00112226	0.00120246	0.000703766	0.000506233	0.00052124	0.000647155	0.000700163	0.000547258	0.00058693	0.000479094	0.000529438	0.000526374	0.000551534	0.000581631	0.000516533	0.000614153	0.000695857	0.000609011	0.00044238	0.000473615	0.000463661	0.000653507	0.000463457	0.000468328	0.000609055
G218	0.0108016	0.0142348	0.0133544	0.0117153	0.0116147	0.015962	0.0119328	0.0103808	0.0116019	0.00750334	0.0128857	0.012181	0.0109711	0.0109907	0.0125185	0.010448	0.0162743	0.00754329	0.0128226	0.0113976	0.0127303	0.00905983	0.00927068	0.0118306	0.0116988	0.0103482	0.0115477	0.0105249	0.0106602	0.0181115	0.0161032	0.013089	0.0127171	0.0100062	0.00939133	0.00875194	0.0121394	0.0160593	0.00994905	0.0117057	0.0156378	0.00981243	0.00929625	0.0100636	0.0144715	0.00965638	0.0125978	0.00963622	0.0166462
G219	0.00154633	0.00154469	0.0011576	0.00166947	0.00142578	0.000953628	0.0015813	0.00126152	0.00159209	0.00539269	0.00113879	0.0036504	0.00179424	0.0011561	0.00202577	0.00166832	0.00170066	0.00141539	0.00137206	0.00127027	0.00126826	0.00150339	0.00121093	0.00171215	0.00185527	0.00168323	0.00226448	0.00153838	0.00209233	0.0029383	0.00154284	0.00133187	0.00194766	0.00170721	0.00142917	0.00168443	0.00571747	0.00103513	0.000876346	0.00249325	0.00290824	0.00122882	0.00142273	0.00202017	0.00632355	0.000889338	0.000933287	0.00111981	0.00119277
G220	0.00705627	0.00579714	0.00448391	0.00430801	0.00508099	0.00412947	0.005318	0.00445935	0.00453526	0.00416315	0.00572179	0.00404521	0.00329614	0.00444171	0.00563494	0.00437885	0.00446264	0.00376082	0.0043869	0.00557175	0.00390497	0.0037845	0.0046493	0.00496201	0.00390246	0.00444219	0.0050653	0.00453739	0.00715583	0.0041832	0.00378556	0.00485113	0.00410043	0.00494775	0.00395822	0.00470553	0.00392876	0.00402094	0.00423013	0.00513213	0.00495769	0.00320561	0.00590481	0.00537787	0.00366824	0.00367087	0.00404535	0.00376492	0.00604151
G221	0.00408998	0.00215189	0.00161386	0.00193943	0.00179413	0.00175301	0.00866481	0.00150022	0.00185201	0.00163755	0.0015819	0.00203952	0.00122391	0.00216681	0.00279183	0.00254028	0.00187046	0.00174064	0.00155879	0.00165152	0.0017698	0.00172398	0.00207994	0.00179063	0.00162462	0.00155189	0.00207587	0.00250495	0.00268937	0.00151582	0.00168476	0.00734357	0.00167481	0.00206895	0.00147413	0.00144147	0.00159399	0.00169666	0.00175164	0.00243066	0.00163347	0.00106089	0.00212525	0.00189882	0.00163421	0.00197414	0.0021407	0.00203609	0.00148903
G222	0.0149995	0.00643064	0.00648265	0.00946861	0.0113109	0.00703167	0.00977324	0.0081149	0.00745105	0.0107414	0.0139919	0.0337055	0.00679728	0.00712098	0.0097432	0.00630547	0.0127264	0.0131029	0.0137538	0.0477833	0.00906222	0.00657534	0.0105798	0.00914315	0.00613926	0.0102112	0.0105898	0.00836343	0.0486159	0.00557369	0.0114375	0.0379749	0.00750198	0.0115503	0.00944434	0.00585612	0.00607025	0.00580922	0.0336318	0.0282924	0.0111176	0.0103373	0.0422255	0.0319963	0.00926557	0.00967464	0.0171253	0.00667591	0.0124145
G223	0.0030669	0.00258794	0.00253938	0.00246533	0.00246764	0.00283064	0.00194669	0.00243587	0.00220173	0.00166107	0.00175098	0.00288181	0.00320412	0.00265236	0.00231021	0.00348722	0.00296059	0.00270656	0.00250657	0.00317061	0.00464891	0.00295239	0.00290863	0.00344458	0.00296642	0.00224349	0.00429327	0.00286038	0.00535141	0.00255984	0.00283644	0.00367187	0.00268587	0.00289238	0.00297433	0.00227608	0.00208433	0.00363292	0.003067	0.00547679	0.0026709	0.00220089	0.00234031	0.00462448	0.00308522	0.00246853	0.0025591	0.0021703	0.00299256
G224	0.000644105	0.000671028	0.000480314	0.00063327	0.000503629	0.000521416	0.000704087	0.000535921	0.00049779	0.000449072	0.000408671	0.000523079	0.000482067	0.000539852	0.000534269	0.000502903	0.000500977	0.000658909	0.000441336	0.000517168	0.000705422	0.000563713	0.000622625	0.000539932	0.000502677	0.000623929	0.000603011	0.000470429	0.000576427	0.000465969	0.000524276	0.00046231	0.000561819	0.000527024	0.0006115	0.000584393	0.000549138	0.000485976	0.000704309	0.000634508	0.000502517	0.000658505	0.000562993	0.000594454	0.000444622	0.000418714	0.000627006	0.000529181	0.000522498
G225	0.0163894	0.0135798	0.0155651	0.0112553	0.0148824	0.00869409	0.00923659	0.0146035	0.0103223	0.0155616	0.0120187	0.0110929	0.00904007	0.010672	0.0130697	0.0134638	0.0125864	0.0107808	0.00927624	0.00906401	0.00573216	0.0079427	0.0111411	0.0105252	0.0106204	0.0119604	0.0107925	0.00918999	0.00822529	0.00785322	0.00810721	0.00981723	0.0107591	0.00939043	0.0107919	0.0111253	0.00702542	0.00762556	0.00867248	0.00970498	0.00922128	0.0147945	0.012365	0.0132195	0.00825187	0.0105313	0.00817625	0.00953162	0.0138094
G226	0.00184761	0.00212643	0.00229634	0.00204453	0.00239993	0.002452	0.00210992	0.00200459	0.00205378	0.00240624	0.00207989	0.00231365	0.00272629	0.00232965	0.00181969	0.00215194	0.00205928	0.00198853	0.00197671	0.00192179	0.00224371	0.00241715	0.00225517	0.00205557	0.00213262	0.00240269	0.0020991	0.00223055	0.002731	0.00275071	0.0021501	0.00224415	0.00212551	0.00202314	0.00277178	0.00209363	0.00225279	0.0029805	0.00247282	0.00226238	0.00186207	0.00226602	0.00200722	0.00216861	0.00240396	0.00257038	0.00210851	0.0024245	0.00216136
G227	0.0031985	0.00500046	0.00412291	0.00429781	0.00428412	0.00636426	0.00328194	0.00520052	0.00437002	0.00365536	0.00374517	0.00488951	0.00500078	0.00432911	0.0044129	0.00454442	0.00490298	0.00404978	0.00571906	0.00515923	0.00483131	0.00441027	0.00606664	0.00720996	0.00427137	0.00432241	0.0046049	0.00436155	0.00834201	0.00612515	0.00396446	0.00408378	0.00551382	0.00371324	0.00515303	0.00457884	0.00456554	0.00650018	0.00681442	0.00570535	0.00427345	0.00499519	0.00566451	0.00434823	0.00403945	0.00385872	0.00653123	0.00422864	0.00431524
G228	0.00217727	0.00154976	0.000657347	0.000871428	0.00217015	0.000645903	0.000562508	0.0010421	0.000631373	0.00153256	0.000679029	0.000619948	0.00134525	0.000947686	0.000635767	0.000587776	0.000603553	0.00205702	0.000575908	0.000577586	0.000623286	0.00093585	0.000580647	0.000601774	0.000659332	0.000773539	0.000719362	0.000761306	0.000764649	0.000999888	0.00131936	0.000733621	0.000603891	0.000634758	0.00108339	0.000663558	0.000637786	0.000765958	0.00154728	0.000720997	0.000529143	0.000682078	0.00152112	0.000574698	0.000626176	0.00061537	0.000585578	0.000644082	0.000643684
G229	0.00113591	0.000553558	0.000805857	0.000474754	0.000703915	0.000773953	0.00239349	0.000465214	0.000646954	0.000604969	0.000503433	0.000497837	0.000492134	0.000441741	0.000512637	0.000490039	0.000691218	0.000591352	0.000503023	0.000597883	0.000463358	0.000471047	0.000742418	0.000485084	0.000425271	0.000508142	0.000609724	0.000561731	0.000420289	0.000484257	0.000663005	0.001441	0.000484809	0.000530575	0.000807244	0.00111627	0.000501816	0.000580128	0.000515978	0.00056301	0.000624941	0.000405176	0.000518394	0.000463284	0.000604577	0.000523378	0.000798134	0.000650251	0.000531024
G230	0.00160216	0.00192607	0.00166645	0.00174602	0.00155088	0.00236264	0.00163527	0.00147951	0.00164534	0.00183585	0.00156345	0.00187919	0.00199669	0.00218384	0.00188686	0.00163169	0.00165172	0.00190244	0.00176135	0.00196934	0.00185295	0.00190178	0.00183006	0.00219219	0.00144093	0.00207067	0.00174295	0.00219116	0.00235206	0.00200285	0.00195245	0.00207254	0.00173027	0.00200415	0.00200855	0.00159561	0.00169462	0.00207802	0.00222372	0.00203876	0.0018433	0.00207195	0.00165891	0.00200551	0.00211967	0.00162115	0.00243219	0.00159328	0.00140678
G231	0.00141803	0.00150913	0.00151582	0.00163956	0.00191757	0.00189018	0.00165047	0.00156601	0.00156205	0.0020084	0.00151521	0.00149472	0.00211967	0.0016332	0.00135347	0.00156234	0.0014567	0.00165162	0.00131814	0.00129219	0.00173235	0.00209532	0.00152287	0.00162568	0.00168707	0.0018919	0.00137515	0.00158106	0.00230409	0.0018332	0.0014784	0.001638	0.00165054	0.00152053	0.00219105	0.00149889	0.00158281	0.00193154	0.00168311	0.00181144	0.00128727	0.0020266	0.00149974	0.00133107	0.00156923	0.00155529	0.00145381	0.00195028	0.00180275
G232	0.00390441	0.00388665	0.00333905	0.0042453	0.00433941	0.00388873	0.00355688	0.00405906	0.00403172	0.00288363	0.00389466	0.00419593	0.0033976	0.00351115	0.00481313	0.00438255	0.00389492	0.00338047	0.00399413	0.00432386	0.00458458	0.00357736	0.00481459	0.00521491	0.00413315	0.00352519	0.00466172	0.00395374	0.00642094	0.00416011	0.00323006	0.00339598	0.00434907	0.00399662	0.00367825	0.00344981	0.0041964	0.00423226	0.00446934	0.00499109	0.00390647	0.0035247	0.00402986	0.00411469	0.00412655	0.00354979	0.00460022	0.00379092	0.00393134
G233	0.00113822	0.00125104	0.00147151	0.00131226	0.00132428	0.00174848	0.00107796	0.000863116	0.00139086	0.00142217	0.00100936	0.00180945	0.00131585	0.0015234	0.0011083	0.000983661	0.00156263	0.00148271	0.00132987	0.00121641	0.0013932	0.00161767	0.00108008	0.00151608	0.00102234	0.00162004	0.00127019	0.00157152	0.00180959	0.00127423	0.00129284	0.00150239	0.00163758	0.00110617	0.00169907	0.00130703	0.00135517	0.00173469	0.0016314	0.00116757	0.00131075	0.00181949	0.00102639	0.00122429	0.00158839	0.00139234	0.00151595	0.00133648	0.00119106
G234	0.00431379	0.00357559	0.00228067	0.00740008	0.0131883	0.00328811	0.00434021	0.00433191	0.00401556	0.00355502	0.00831234	0.00310134	0.00313852	0.00317327	0.00448863	0.00382396	0.00410175	0.0240049	0.0039143	0.0050938	0.00612668	0.00701256	0.00345764	0.00476734	0.00350778	0.00519774	0.00557763	0.00355642	0.004056	0.0086252	0.00252836	0.00398233	0.00356695	0.00396144	0.00390349	0.00308207	0.00470586	0.00312704	0.00240535	0.00565129	0.00385138	0.00391365	0.00374003	0.0038287	0.00348007	0.00454684	0.00337742	0.0031214	0.00467217
G235	0.00723749	0.00705668	0.00908261	0.00616335	0.00752504	0.00573503	0.00690223	0.0071192	0.00800229	0.00977503	0.00826981	0.0083047	0.00631773	0.0080582	0.00751343	0.00842998	0.00747858	0.00718777	0.00759115	0.00656596	0.00603985	0.00554814	0.00504136	0.00515945	0.00800725	0.00798978	0.00625761	0.00658769	0.00400162	0.00621569	0.00756383	0.0065191	0.0062667	0.00733064	0.00616501	0.0117005	0.0069144	0.00532787	0.00730351	0.00709084	0.00981457	0.00633268	0.00788122	0.00637723	0.00740667	0.00731238	0.00804373	0.00784849	0.00885067
G236	0.0023934	0.00305504	0.0030384	0.00307426	0.00366117	0.00330584	0.00330877	0.00306283	0.0028287	0.00305575	0.00298228	0.00276767	0.00342928	0.00320751	0.00320902	0.00279855	0.00294882	0.002801	0.00245105	0.00268299	0.0029948	0.00386531	0.00345312	0.00355866	0.00301357	0.00248596	0.00286728	0.00355388	0.00391518	0.00384899	0.00278779	0.00327219	0.00309998	0.00308144	0.00338315	0.00218152	0.00282668	0.00385891	0.00317715	0.00358625	0.00251412	0.00316627	0.00282717	0.0032494	0.00330987	0.00266615	0.00288408	0.00279874	0.00285584
G237	0.00068694	0.000623286	0.000836196	0.000673805	0.000723912	0.000732237	0.000655027	0.000680627	0.000773062	0.000844797	0.000652969	0.000797233	0.000729042	0.000818214	0.00074687	0.000781052	0.0006715	0.000736404	0.000632222	0.000657373	0.000766799	0.000758203	0.000641027	0.000800973	0.000681245	0.000771695	0.000709248	0.000739816	0.000794668	0.000873696	0.000727461	0.000758857	0.00066215	0.000797899	0.000836575	0.000757281	0.000694619	0.000820432	0.000856874	0.000823246	0.00066654	0.000841417	0.000696693	0.000729995	0.000770549	0.000654547	0.000756741	0.000758533	0.000834814
G238	0.00851661	0.00342006	0.00298748	0.00544152	0.0043987	0.00371715	0.0130444	0.00419286	0.00332114	0.00533538	0.00447061	0.0037276	0.00373499	0.00547085	0.00456817	0.00426319	0.00600965	0.00561445	0.00387364	0.00588216	0.00534098	0.00310826	0.00525723	0.00423904	0.00543948	0.00403649	0.00774736	0.00561375	0.00597007	0.00310625	0.00484718	0.0103074	0.00434037	0.00460186	0.00414634	0.00279276	0.00407612	0.00311906	0.00329351	0.00359545	0.00370089	0.00492212	0.00453713	0.00536165	0.00413883	0.00534412	0.00316376	0.0040231	0.00424531
G239	0.00154305	0.00143271	0.00172532	0.00137045	0.00154201	0.00202838	0.000949638	0.00120647	0.0013269	0.00219092	0.00146893	0.00167486	0.00184241	0.00194337	0.00142825	0.00131452	0.00151461	0.00174011	0.00170666	0.00125905	0.00257113	0.00192002	0.00135252	0.00159063	0.001662	0.00180786	0.00155444	0.00189406	0.00161617	0.00124879	0.0017794	0.00133844	0.00207853	0.0014943	0.00220627	0.00162589	0.00160786	0.00195394	0.0018869	0.00129416	0.0014645	0.00204242	0.00144382	0.00150709	0.00192083	0.00155785	0.00168299	0.0023197	0.00193818
G240	0.000883567	0.000910132	0.000912748	0.000900143	0.000965557	0.00105471	0.000771431	0.00076396	0.000981109	0.00112196	0.00087007	0.000883302	0.000888635	0.00103142	0.000904131	0.000806586	0.00110013	0.000968471	0.000836107	0.000883354	0.000924675	0.00124584	0.000873982	0.00106452	0.000837638	0.000790736	0.000985886	0.000969506	0.00108239	0.00111281	0.00105283	0.000951137	0.000887058	0.00083551	0.00106933	0.000897113	0.000822835	0.000845763	0.00105856	0.00084162	0.000860264	0.000904136	0.000908108	0.000969145	0.00120039	0.00119358	0.000922804	0.00103817	0.000896321
G241	0.00240393	0.00176205	0.00176899	0.00219642	0.00213467	0.00167702	0.00209437	0.00187021	0.00301559	0.00147721	0.00154602	0.00187116	0.00212011	0.00176096	0.00227393	0.00147759	0.00139639	0.00206799	0.00194693	0.00219895	0.0016706	0.00201933	0.00136482	0.00162088	0.00166557	0.00238424	0.00197356	0.00183134	0.0020678	0.00185052	0.00199333	0.00235853	0.00211128	0.00210034	0.00154621	0.00192331	0.00262428	0.00142875	0.00180444	0.00248424	0.0026988	0.00168515	0.00178513	0.00158641	0.00185856	0.00184612	0.00190641	0.00196735	0.00249828
G242	0.038947	0.0406441	0.0430856	0.0387145	0.0336815	0.0283334	0.0379377	0.0341837	0.0359226	0.0434773	0.0355495	0.0316478	0.0276231	0.0381984	0.0346631	0.0310928	0.0355042	0.0307764	0.0325338	0.0277028	0.0260205	0.0321292	0.03264	0.0338866	0.0310023	0.0351462	0.0329218	0.0316778	0.0231555	0.0253066	0.0320762	0.0332978	0.0273931	0.0363216	0.0292578	0.0426189	0.0344525	0.0231878	0.0333627	0.035843	0.0360277	0.0348494	0.0338185	0.0275196	0.031912	0.0303447	0.0335107	0.0343389	0.0417474
G243	0.018902	0.0108251	0.0165736	0.0102923	0.00779667	0.00732954	0.0105827	0.0122718	0.0101963	0.0146983	0.0125518	0.00910931	0.0123092	0.0098685	0.0126048	0.00991849	0.0124192	0.01263	0.00972773	0.0190202	0.00786805	0.00797977	0.0111796	0.00997237	0.010876	0.0130091	0.0100628	0.0112439	0.008483	0.00723505	0.0107879	0.0120498	0.0108078	0.0096159	0.00955913	0.0135034	0.00626342	0.00795705	0.00969356	0.00778274	0.0106862	0.0112991	0.0110666	0.0184064	0.00863895	0.00999934	0.00802858	0.00941152	0.0105845
G244	0.00221456	0.00206182	0.00122822	0.000909713	0.00124549	0.000902258	0.000785475	0.00113441	0.000997621	0.0024135	0.000914222	0.00113769	0.000871695	0.000930901	0.0011246	0.000779122	0.000905862	0.000950403	0.000879955	0.000847329	0.000918339	0.00122429	0.000696996	0.000927406	0.000691127	0.000893689	0.000859158	0.000970758	0.00100451	0.000945826	0.000941781	0.00121253	0.000767161	0.000943631	0.000947216	0.00101809	0.0009995	0.0009098	0.000944543	0.00114883	0.00115617	0.00101317	0.00101527	0.00084358	0.000914153	0.00087481	0.000818684	0.000912199	0.000832106
[truncated: 33 more columns]
