# Supplementary material for: Network Structure Analysis Identifying Key Genes of Autism and Its Mechanism
Source: Comput Math Methods Med. 2020 Mar 23;2020:3753080. doi: 10.1155/2020/3753080 (PMC7125446; doi:10.1155/2020/3753080)
Supplement: Supplementary Materials — Data1: sheet1 is about 244 genes related to ASD; sheet2 is about the expression profile of 244 genes related to ASD in the control group (C); sheet3 is about the expression profile of 244 genes related to ASD in the experimental group (E). Data2: sheet1 and sheet2 are the Spearman correlation coefficients of C and E, respectively. Data3: the Spearman correlation networks of C at different threshold (0.1–1) (sheet1–sheet10). Data4: the Spearman correlation networks of E at different threshold (0.1–1) (sheet1–sheet10). Data5: comparison of node degree of C and E 's correlation networks under different thresholds (sheet1–sheet4). Data6: analysis of structural key genes (sheet1–sheet5). [file 3753080.f1.zip › 3753080.f1/ProcessedData/Data2-Spearman correlation coefficient of C and E.xlsx]

## Sheet: C
	G1	G2	G3	G4	G5	G6	G7	G8	G9	G10	G11	G12	G13	G14	G15	G16	G17	G18	G19	G20	G21	G22	G23	G24	G25	G26	G27	G28	G29	G30	G31	G32	G33	G34	G35	G36	G37	G38	G39	G40	G41	G42	G43	G44	G45	G46	G47	G48	G49
G1	1	0.129441	0.34533	0.537134	0.580952	0.0512821	0.592308	0.426603	0.288782	0.515888	0.573214	-0.22935	0.0919414	0.429579	-0.0369505	-0.025	-0.0311813	0.56685	-0.371566	-0.416026	0.462179	-0.323764	0.425778	0.577335	0.213782	0.529258	0.583608	0.392308	0.469322	0.415614	-0.0341575	0.250595	0.120559	-0.036859	0.381666	0.656548	0.278984	-0.0980311	-0.0975275	0.381548	0.160211	0.412775	0.510989	0.334661	-0.0485806	-0.127198	-0.0121795	0.357097	0.00728022
G2	0.129441	1	0.0992674	0.195009	-0.00499084	0.232921	0.0945055	-0.00389194	-0.0514652	0.219689	0.0307234	0.0596612	0.0139194	0.126511	0.0792125	0.000778388	0.414744	0.0843864	0.0137821	-0.0780678	0.212683	-0.0143773	-0.0297619	0.159249	0.327885	-0.0221154	-0.0349359	0.0647436	0.0871795	0.148443	0.19011	0.303114	0.177152	-0.106777	-0.0271981	0.0840659	0.0919872	-0.0614927	0.155861	-0.0326923	-0.00462454	-0.153892	0.0323718	0.113462	0.1038	0.0798993	-0.154762	0.123489	-0.0709249
G3	0.34533	0.0992674	1	0.0929487	0.426419	0.0653388	0.546429	0.242857	0.1375	0.276419	0.20641	-0.263874	0.0858974	0.286722	0.0317766	0.0949176	0.157921	0.240751	-0.291941	-0.381502	0.178938	-0.284249	0.439789	0.500092	0.158059	0.39359	0.417216	0.20261	0.37761	0.314377	-0.196932	-0.103571	-0.0434524	-0.114789	0.134777	0.424588	0.252839	-0.0421245	-0.121886	0.270284	-0.0232601	0.317491	0.230266	0.411401	-0.0284341	-0.0659799	-0.0278388	0.286081	0.104075
G4	0.537134	0.195009	0.0929487	1	0.577839	0.0790751	0.507784	0.31456	0.221795	0.594918	0.45696	0.0748626	-0.0854396	0.371062	-0.16891	-0.110668	-0.0720238	0.745467	-0.597024	-0.243269	0.656685	-0.487179	0.334661	0.451603	0.140156	0.366621	0.472665	0.618498	0.457875	0.268361	0.0686355	0.0799451	0.194963	-0.0540751	0.624824	0.608791	0.269734	-0.0976648	-0.0729396	0.113049	0.586722	0.214286	0.526694	0.383837	-0.0309066	-0.17381	-0.0639194	0.683974	-0.102839
G5	0.580952	-0.00499084	0.426419	0.577839	1	-0.0300824	0.661035	0.337546	0.497299	0.519689	0.607463	-0.197711	-0.00714286	0.425	-0.0780678	-0.031456	-0.181273	0.497894	-0.531319	-0.381777	0.47413	-0.437225	0.491621	0.634524	0.0779304	0.454533	0.607555	0.377701	0.645833	0.32239	-0.286355	-0.0516941	0.0014652	0.170559	0.380911	0.681822	0.481136	-0.175916	-0.0692308	0.297573	0.0971154	0.429808	0.529258	0.332463	-0.241209	-0.16424	0.147985	0.485806	0.0898352
G6	0.0512821	0.232921	0.0653388	0.0790751	-0.0300824	1	0.0282967	-0.0161172	-0.00347985	0.171337	0.0852106	0.131639	0.157005	0.242491	-0.0667125	0.286126	0.280632	0.0312729	0.0582418	-0.078663	0.170788	-0.227335	0.0546245	0.026511	0.176236	0.174313	0.0278388	0.0973443	0.137637	0.148443	0.0809524	0.195101	0.338507	0.022619	0.0646985	-0.0135989	0.0523352	-0.128159	0.224542	-0.14217	0.0200549	0.125183	-0.0121795	0.107326	0.105449	-0.140064	0.321383	0.180723	0.112637
G7	0.592308	0.0945055	0.546429	0.507784	0.661035	0.0282967	1	0.334295	0.37065	0.547024	0.466758	-0.106731	0.228205	0.382005	0.131593	0.21337	0.075641	0.495101	-0.596108	-0.365659	0.64533	-0.382647	0.449084	0.699634	0.186767	0.608013	0.564881	0.248443	0.696337	0.379258	-0.281822	-0.0941392	0.0483516	0.0374542	0.367449	0.710531	0.513095	-0.090522	0.0335165	0.440064	0.0613553	0.516575	0.485623	0.591117	-0.187958	-0.0940018	0.102793	0.460211	0.0512821
G8	0.426603	-0.00389194	0.242857	0.31456	0.337546	-0.0161172	0.334295	1	0.120604	0.276374	0.359341	-0.0391941	-0.0288004	0.120788	-0.0781136	-0.0831502	-0.127335	0.275778	-0.395879	-0.269185	0.355998	-0.333379	0.485027	0.377106	0.157601	0.227473	0.381548	0.286767	0.25815	0.306639	0.0845696	0.0442308	-0.023489	0.03837	0.188509	0.499038	0.302152	-0.171383	0.0531593	0.325092	0.0945055	0.263828	0.295696	0.239469	-0.0249084	-0.0666209	0.0268773	0.256044	0.0593864
G9	0.288782	-0.0514652	0.1375	0.221795	0.497299	-0.00347985	0.37065	0.120604	1	0.305907	0.322207	-0.136264	-0.0275641	0.174542	0.0413462	0.10206	-0.0776099	0.148901	-0.248443	-0.222573	0.200412	-0.0825549	0.105907	0.31044	-0.0379579	0.368315	0.387363	0.128617	0.31891	0.260943	-0.223214	-0.059478	-0.0806777	0.173397	0.206298	0.270513	0.501099	-0.196703	0.0395147	0.0888278	-0.103526	0.309478	0.264377	0.0156593	-0.131685	-0.218498	0.284661	0.182647	0.188782
G10	0.515888	0.219689	0.276419	0.594918	0.519689	0.171337	0.547024	0.276374	0.305907	1	0.368086	0.126374	0.117079	0.27065	-0.00934066	0.0891026	0.0657051	0.565385	-0.555357	-0.265476	0.613553	-0.464194	0.348443	0.6125	0.0276099	0.450229	0.575916	0.444322	0.492537	0.291484	0.0173535	0.0435897	0.0740842	-0.0836538	0.385215	0.496703	0.445147	-0.138782	0.0397894	0.262408	0.319139	0.419505	0.584478	0.490614	-0.123443	-0.187592	-0.0313645	0.497894	0.0119048
G11	0.573214	0.0307234	0.20641	0.45696	0.607463	0.0852106	0.466758	0.359341	0.322207	0.368086	1	-0.0306319	0.0764194	0.250641	-0.0809524	-0.0657509	-0.25261	0.422207	-0.511951	-0.307647	0.519231	-0.448581	0.458562	0.407234	0.0775641	0.432463	0.519734	0.2913	0.589606	0.308837	-0.143361	0.195192	0.249908	0.275366	0.337504	0.552564	0.233013	-0.0947344	0.0817308	0.307555	0.14478	0.496932	0.461905	0.318727	-0.333104	-0.116804	0.116575	0.388416	0.108837
G12	-0.22935	0.0596612	-0.263874	0.0748626	-0.197711	0.131639	-0.106731	-0.0391941	-0.136264	0.126374	-0.0306319	1	-0.215888	-0.118956	-0.0174451	0.158562	0.149451	0.0596154	0.0279762	0.24533	0.054304	-0.105311	-0.187958	-0.0582875	-0.06337	-0.244689	-0.124725	-0.00100733	0.113965	-0.0995421	0.0580128	0.0499542	0.134203	-0.0377289	-0.0632333	-0.23283	0.0358974	-0.236264	0.303022	-0.0743132	0.221978	-0.0574634	-0.203663	-0.0674908	0.0273352	-0.23315	0.031456	0.00567766	0.162775
G13	0.0919414	0.0139194	0.0858974	-0.0854396	-0.00714286	0.157005	0.228205	-0.0288004	-0.0275641	0.117079	0.0764194	-0.215888	1	0.111035	0.663553	0.0926282	0.0666667	-0.115018	-0.0724817	0.1337	0.0432692	-0.0290751	-0.158516	-0.0250458	0.134386	0.16598	0.11369	-0.125183	0.11859	0.102198	-0.0887363	0.110027	-0.0712912	-0.0133242	-0.0180634	0.0505952	0.166117	0.39794	0.133745	0.228022	-0.343223	0.071337	0.0142857	0.186355	-0.46131	0.482784	-0.0390568	-0.0575549	-0.127335
G14	0.429579	0.126511	0.286722	0.371062	0.425	0.242491	0.382005	0.120788	0.174542	0.27065	0.250641	-0.118956	0.111035	1	0.0750916	0.0833791	0.0925366	0.429029	-0.259753	-0.185485	0.240156	-0.285211	0.27848	0.403297	0.506914	0.195971	0.46337	0.251923	0.445147	0.417628	0.129396	0.299542	0.415293	-0.00975275	0.26754	0.26543	0.142766	0.0195513	0.0496795	0.0728938	0.124588	0.243727	0.372619	0.193636	-0.196474	-0.0897894	0.145238	0.300137	-0.0596154
G15	-0.0369505	0.0792125	0.0317766	-0.16891	-0.0780678	-0.0667125	0.131593	-0.0781136	0.0413462	-0.00934066	-0.0809524	-0.0174451	0.663553	0.0750916	1	-0.0427656	0.0513736	-0.14043	0.0337454	0.356593	-0.028663	0.0961081	-0.23054	-0.0826465	0.137042	0.0485348	0.0414835	-0.245925	0.163233	-0.00760073	-0.027152	0.131822	-0.0762821	0.0837912	-0.00531142	-0.093315	0.263874	0.487179	0.0814103	0.143864	-0.202839	0.00517399	-0.0974817	0.113233	-0.523306	0.646749	-0.18054	-0.164377	-0.178755
G16	-0.025	0.000778388	0.0949176	-0.110668	-0.031456	0.286126	0.21337	-0.0831502	0.10206	0.0891026	-0.0657509	0.158562	0.0926282	0.0833791	-0.0427656	1	0.352747	-0.137317	-0.019185	-0.0683608	-0.0197802	0.048489	-0.0264652	0.223993	-0.15467	0.120284	0.121429	-0.057967	0.0479853	-0.131273	-0.107738	-0.0750916	-0.0479853	0.0555861	-0.208794	0.0519231	0.0119963	-0.447161	0.0426282	0.116529	-0.197161	0.269872	0.0233059	0.108745	0.147253	-0.341575	0.0656593	-0.0742674	0.0375
G17	-0.0311813	0.414744	0.157921	-0.0720238	-0.181273	0.280632	0.075641	-0.127335	-0.0776099	0.0657051	-0.25261	0.149451	0.0666667	0.0925366	0.0513736	0.352747	1	-0.103022	0.182555	-0.192216	0.0652473	0.03663	-0.0153388	-0.0010989	0.237179	0.107051	-0.0767399	-0.0682692	-0.00283883	0.194734	0.0249084	0.304808	0.150962	-0.105266	-0.228482	-0.0361722	-0.0815934	-0.249222	0.121245	0.103709	-0.130998	-0.0203755	0.0108974	0.084707	0.219093	-0.173718	-0.0889652	0.040522	0.0114927
G18	0.56685	0.0843864	0.240751	0.745467	0.497894	0.0312729	0.495101	0.275778	0.148901	0.565385	0.422207	0.0596154	-0.115018	0.429029	-0.14043	-0.137317	-0.103022	1	-0.630952	-0.244918	0.666346	-0.474634	0.518407	0.471978	0.190201	0.394872	0.564148	0.547756	0.586676	0.247344	0.127747	0.0777473	0.17793	-0.161401	0.676725	0.512363	0.268452	-0.00695971	-0.0562271	0.175092	0.546932	0.417628	0.579716	0.413004	-0.0607601	-0.175046	-0.130998	0.708013	0.0353938
G19	-0.371566	0.0137821	-0.291941	-0.597024	-0.531319	0.0582418	-0.596108	-0.395879	-0.248443	-0.555357	-0.511951	0.0279762	-0.0724817	-0.259753	0.0337454	-0.019185	0.182555	-0.630952	1	0.291071	-0.694597	0.584112	-0.482601	-0.5375	-0.0531593	-0.456319	-0.528205	-0.391529	-0.588782	-0.250275	-0.0444597	0.118498	-0.155678	-0.0350275	-0.603578	-0.533471	-0.365659	-0.0510531	-0.0134158	-0.219277	-0.387179	-0.45641	-0.518452	-0.554808	0.27413	0.0639652	0.176374	-0.579487	0.17152
G20	-0.416026	-0.0780678	-0.381502	-0.243269	-0.381777	-0.078663	-0.365659	-0.269185	-0.222573	-0.265476	-0.307647	0.24533	0.1337	-0.185485	0.356593	-0.0683608	-0.192216	-0.244918	0.291071	1	-0.287179	0.295101	-0.481364	-0.488645	-0.109799	-0.273581	-0.307647	-0.252152	-0.217353	-0.510302	0.0736722	-0.0592949	-0.0707875	-0.0900183	-0.104992	-0.467399	-0.152473	0.366117	-0.0255952	-0.261676	-0.0025641	-0.123443	-0.452152	-0.200824	-0.22239	0.510073	-0.183745	-0.24359	-0.183104
G21	0.462179	0.212683	0.178938	0.656685	0.47413	0.170788	0.64533	0.355998	0.200412	0.613553	0.519231	0.054304	0.0432692	0.240156	-0.028663	-0.0197802	0.0652473	0.666346	-0.694597	-0.287179	1	-0.466209	0.461584	0.499771	0.17326	0.447711	0.467033	0.402335	0.622573	0.287088	0.0255037	0.0350275	0.19043	0.084707	0.560446	0.588278	0.363782	-0.0607601	0.00315934	0.326099	0.340797	0.441529	0.591392	0.542766	-0.106639	-0.107875	-0.148626	0.637592	-0.0576007
G22	-0.323764	-0.0143773	-0.284249	-0.487179	-0.437225	-0.227335	-0.382647	-0.333379	-0.0825549	-0.464194	-0.448581	-0.105311	-0.0290751	-0.285211	0.0961081	0.048489	0.03663	-0.474634	0.584112	0.295101	-0.466209	1	-0.478938	-0.385027	-0.142674	-0.288049	-0.446658	-0.379716	-0.431822	-0.416026	0.0560897	-0.0267857	-0.161447	-0.0650183	-0.470495	-0.362637	-0.305495	0.144368	-0.304899	-0.286676	-0.293681	-0.217857	-0.430311	-0.432051	0.123077	0.200824	-0.0475275	-0.487729	-0.0998168
G23	0.425778	-0.0297619	0.439789	0.334661	0.491621	0.0546245	0.449084	0.485027	0.105907	0.348443	0.458562	-0.187958	-0.158516	0.27848	-0.23054	-0.0264652	-0.0153388	0.518407	-0.482601	-0.481364	0.461584	-0.478938	1	0.540568	0.160119	0.404808	0.461538	0.444048	0.377793	0.318864	-0.0824634	-0.0496795	0.235806	-0.0342949	0.40756	0.524267	0.223901	-0.046337	-0.065522	0.424725	0.261493	0.529029	0.555907	0.434295	-0.00389194	-0.25815	0.127793	0.503709	0.168681
G24	0.577335	0.159249	0.500092	0.451603	0.634524	0.026511	0.699634	0.377106	0.31044	0.6125	0.407234	-0.0582875	-0.0250458	0.403297	-0.0826465	0.223993	-0.0010989	0.471978	-0.5375	-0.488645	0.499771	-0.385027	0.540568	1	0.145742	0.381868	0.698352	0.301511	0.445513	0.335714	-0.202701	-0.0376374	0.044185	-0.0558608	0.298584	0.665751	0.439377	-0.332921	0.0348443	0.398581	0.132326	0.539973	0.45467	0.516667	-0.0111264	-0.321016	0.089011	0.411813	0.133333
G25	0.213782	0.327885	0.158059	0.140156	0.0779304	0.176236	0.186767	0.157601	-0.0379579	0.0276099	0.0775641	-0.06337	0.134386	0.506914	0.137042	-0.15467	0.237179	0.190201	-0.0531593	-0.109799	0.17326	-0.142674	0.160119	0.145742	1	0.0656593	0.0586081	0.0590201	0.274313	0.38228	0.126648	0.371062	0.327473	-0.238233	0.174819	0.283333	0.110302	0.0892857	0.24826	0.274313	0.0288004	0.0591575	0.124908	-0.0103938	0.0195055	0.0260531	-0.0227564	0.149954	-0.00540293
G26	0.529258	-0.0221154	0.39359	0.366621	0.454533	0.174313	0.608013	0.227473	0.368315	0.450229	0.432463	-0.244689	0.16598	0.195971	0.0485348	0.120284	0.107051	0.394872	-0.456319	-0.273581	0.447711	-0.288049	0.404808	0.381868	0.0656593	1	0.4663	0.426007	0.54478	0.184112	-0.15435	0.0608059	0.195238	0.00480769	0.307375	0.554121	0.391255	0.0672161	-0.119231	0.426328	0.072207	0.579991	0.540018	0.496795	-0.0602564	0.0331502	-0.0141941	0.512821	0.0340659
G27	0.583608	-0.0349359	0.417216	0.472665	0.607555	0.0278388	0.564881	0.381548	0.387363	0.575916	0.519734	-0.124725	0.11369	0.46337	0.0414835	0.121429	-0.0767399	0.564148	-0.528205	-0.307647	0.467033	-0.446658	0.461538	0.698352	0.0586081	0.4663	1	0.476099	0.516758	0.362592	-0.0944597	0.0680861	0.072619	0.0334707	0.463261	0.627381	0.390522	-0.0936813	0.0244963	0.410668	0.105495	0.5413	0.503114	0.351007	-0.196474	-0.131456	0.0021978	0.464057	0.16946
G28	0.392308	0.0647436	0.20261	0.618498	0.377701	0.0973443	0.248443	0.286767	0.128617	0.444322	0.2913	-0.00100733	-0.125183	0.251923	-0.245925	-0.057967	-0.0682692	0.547756	-0.391529	-0.252152	0.402335	-0.379716	0.444048	0.301511	0.0590201	0.426007	0.476099	1	0.302473	0.210852	0.0870421	0.0401099	0.281502	-0.0919414	0.535377	0.45261	0.161126	0.0588828	-0.122527	0.177839	0.376969	0.200549	0.467949	0.180495	0.081456	-0.137271	0.00137363	0.585119	0.0924451
G29	0.469322	0.0871795	0.37761	0.457875	0.645833	0.137637	0.696337	0.25815	0.31891	0.492537	0.589606	0.113965	0.11859	0.445147	0.163233	0.0479853	-0.00283883	0.586676	-0.588782	-0.217353	0.622573	-0.431822	0.377793	0.445513	0.274313	0.54478	0.516758	0.302473	1	0.269551	-0.130128	0.112592	0.150641	0.109661	0.471159	0.556319	0.442353	0.0293956	0.131685	0.297894	0.18196	0.572802	0.491667	0.45641	-0.311538	-0.00989011	-0.0281593	0.529258	-0.0374084
G30	0.415614	0.148443	0.314377	0.268361	0.32239	0.148443	0.379258	0.306639	0.260943	0.291484	0.308837	-0.0995421	0.102198	0.417628	-0.00760073	-0.131273	0.194734	0.247344	-0.250275	-0.510302	0.287088	-0.416026	0.318864	0.335714	0.38228	0.184112	0.362592	0.210852	0.269551	1	0.00691392	0.293544	0.117308	-0.0446429	0.270997	0.273993	0.19217	-0.0944597	0.452564	0.245284	-0.0415293	-0.018544	0.270879	0.118681	-0.109799	-0.208379	0.207509	0.26163	0.225229
G31	-0.0341575	0.19011	-0.196932	0.0686355	-0.286355	0.0809524	-0.281822	0.0845696	-0.223214	0.0173535	-0.143361	0.0580128	-0.0887363	0.129396	-0.027152	-0.107738	0.0249084	0.127747	-0.0444597	0.0736722	0.0255037	0.0560897	-0.0824634	-0.202701	0.126648	-0.15435	-0.0944597	0.0870421	-0.130128	0.00691392	1	0.358288	0.245879	-0.123306	-0.0176513	-0.168407	-0.261676	0.173489	0.0310897	-0.315156	0.137179	-0.281273	-0.0355311	-0.254625	0.187225	0.111035	-0.162775	-0.136401	-0.219093
G32	0.250595	0.303114	-0.103571	0.0799451	-0.0516941	0.195101	-0.0941392	0.0442308	-0.059478	0.0435897	0.195192	0.0499542	0.110027	0.299542	0.131822	-0.0750916	0.304808	0.0777473	0.118498	-0.0592949	0.0350275	-0.0267857	-0.0496795	-0.0376374	0.371062	0.0608059	0.0680861	0.0401099	0.112592	0.293544	0.358288	1	0.38576	0.123947	-0.0548312	0.0177198	-0.0471612	0.00238095	0.327381	-0.0132326	0.00210623	0.0285256	0.0766026	-0.13837	-0.0285714	0.0674451	-0.0286172	-0.0806319	0.0506868
G33	0.120559	0.177152	-0.0434524	0.194963	0.0014652	0.338507	0.0483516	-0.023489	-0.0806777	0.0740842	0.249908	0.134203	-0.0712912	0.415293	-0.0762821	-0.0479853	0.150962	0.17793	-0.155678	-0.0707875	0.19043	-0.161447	0.235806	0.044185	0.327473	0.195238	0.072619	0.281502	0.150641	0.117308	0.245879	0.38576	1	0.121658	0.198423	0.0782967	-0.0676282	0.197482	0.0425366	-0.0350275	0.208333	0.110989	0.145513	0.0642857	-0.0268315	-0.082967	0.276511	0.183333	0.0364011
G34	-0.036859	-0.106777	-0.114789	-0.0540751	0.170559	0.022619	0.0374542	0.03837	0.173397	-0.0836538	0.275366	-0.0377289	-0.0133242	-0.00975275	0.0837912	0.0555861	-0.105266	-0.161401	-0.0350275	-0.0900183	0.084707	-0.0650183	-0.0342949	-0.0558608	-0.238233	0.00480769	0.0334707	-0.0919414	0.109661	-0.0446429	-0.123306	0.123947	0.121658	1	-0.103573	-0.0598443	0.018315	-0.0358059	-0.0218407	-0.0823718	-0.187592	0.0605769	0.105632	0.0615842	-0.237271	0.00251832	0.282601	-0.0542582	-0.0804945
G35	0.381666	-0.0271981	0.134777	0.624824	0.380911	0.0646985	0.367449	0.188509	0.206298	0.385215	0.337504	-0.0632333	-0.0180634	0.26754	-0.00531142	-0.208794	-0.228482	0.676725	-0.603578	-0.104992	0.560446	-0.470495	0.40756	0.298584	0.174819	0.307375	0.463261	0.535377	0.471159	0.270997	-0.0176513	-0.0548312	0.198423	-0.103573	1	0.428347	0.25726	0.223469	0.0781144	0.164562	0.508225	0.34499	0.531645	0.353782	-0.184595	0.0248629	-0.0525189	0.613446	-0.121819
G36	0.656548	0.0840659	0.424588	0.608791	0.681822	-0.0135989	0.710531	0.499038	0.270513	0.496703	0.552564	-0.23283	0.0505952	0.26543	-0.093315	0.0519231	-0.0361722	0.512363	-0.533471	-0.467399	0.588278	-0.362637	0.524267	0.665751	0.283333	0.554121	0.627381	0.45261	0.556319	0.273993	-0.168407	0.0177198	0.0782967	-0.0598443	0.428347	1	0.402839	-0.190476	-0.132005	0.499588	0.197344	0.502839	0.567995	0.433471	-0.00659341	-0.167125	-0.0574634	0.467033	0.0789377
G37	0.278984	0.0919872	0.252839	0.269734	0.481136	0.0523352	0.513095	0.302152	0.501099	0.445147	0.233013	0.0358974	0.166117	0.142766	0.263874	0.0119963	-0.0815934	0.268452	-0.365659	-0.152473	0.363782	-0.305495	0.223901	0.439377	0.110302	0.391255	0.390522	0.161126	0.442353	0.19217	-0.261676	-0.0471612	-0.0676282	0.018315	0.25726	0.402839	1	-0.103526	0.158425	0.374817	-0.0483516	0.330128	0.360348	0.341071	-0.239652	-0.120696	0.0166209	0.270101	0.0717033
G38	-0.0980311	-0.0614927	-0.0421245	-0.0976648	-0.175916	-0.128159	-0.090522	-0.171383	-0.196703	-0.138782	-0.0947344	-0.236264	0.39794	0.0195513	0.487179	-0.447161	-0.249222	-0.00695971	-0.0510531	0.366117	-0.0607601	0.144368	-0.046337	-0.332921	0.0892857	0.0672161	-0.0936813	0.0588828	0.0293956	-0.0944597	0.173489	0.00238095	0.197482	-0.0358059	0.223469	-0.190476	-0.103526	1	-0.183425	-0.0366758	0.07587	-0.0914377	-0.0527473	0.0105769	-0.35119	0.664286	-0.168178	-0.0740842	-0.347985
G39	-0.0975275	0.155861	-0.121886	-0.0729396	-0.0692308	0.224542	0.0335165	0.0531593	0.0395147	0.0397894	0.0817308	0.303022	0.133745	0.0496795	0.0814103	0.0426282	0.121245	-0.0562271	-0.0134158	-0.0255952	0.00315934	-0.304899	-0.065522	0.0348443	0.24826	-0.119231	0.0244963	-0.122527	0.131685	0.452564	0.0310897	0.327381	0.0425366	-0.0218407	0.0781144	-0.132005	0.158425	-0.183425	1	0.094185	-0.172619	-0.0635989	-0.112317	-0.0707875	-0.195925	-0.120238	0.264469	-0.0864469	0.203617
G40	0.381548	-0.0326923	0.270284	0.113049	0.297573	-0.14217	0.440064	0.325092	0.0888278	0.262408	0.307555	-0.0743132	0.228022	0.0728938	0.143864	0.116529	0.103709	0.175092	-0.219277	-0.261676	0.326099	-0.286676	0.424725	0.398581	0.274313	0.426328	0.410668	0.177839	0.297894	0.245284	-0.315156	-0.0132326	-0.0350275	-0.0823718	0.164562	0.499588	0.374817	-0.0366758	0.094185	1	-0.197024	0.427656	0.411355	0.253846	-0.097848	-0.0164835	-0.264057	0.203434	0.115934
G41	0.160211	-0.00462454	-0.0232601	0.586722	0.0971154	0.0200549	0.0613553	0.0945055	-0.103526	0.319139	0.14478	0.221978	-0.343223	0.124588	-0.202839	-0.197161	-0.130998	0.546932	-0.387179	-0.0025641	0.340797	-0.293681	0.261493	0.132326	0.0288004	0.072207	0.105495	0.376969	0.18196	-0.0415293	0.137179	0.00210623	0.208333	-0.187592	0.508225	0.197344	-0.0483516	0.07587	-0.172619	-0.197024	1	0.160027	0.338004	0.257738	0.116163	-0.0706502	-0.13109	0.448031	-0.105266
G42	0.412775	-0.153892	0.317491	0.214286	0.429808	0.125183	0.516575	0.263828	0.309478	0.419505	0.496932	-0.0574634	0.071337	0.243727	0.00517399	0.269872	-0.0203755	0.417628	-0.45641	-0.123443	0.441529	-0.217857	0.529029	0.539973	0.0591575	0.579991	0.5413	0.200549	0.572802	-0.018544	-0.281273	0.0285256	0.110989	0.0605769	0.34499	0.502839	0.330128	-0.0914377	-0.0635989	0.427656	0.160027	1	0.491941	0.514515	-0.218178	-0.106777	-0.0162546	0.41163	0.00929487
G43	0.510989	0.0323718	0.230266	0.526694	0.529258	-0.0121795	0.485623	0.295696	0.264377	0.584478	0.461905	-0.203663	0.0142857	0.372619	-0.0974817	0.0233059	0.0108974	0.579716	-0.518452	-0.452152	0.591392	-0.430311	0.555907	0.45467	0.124908	0.540018	0.503114	0.467949	0.491667	0.270879	-0.0355311	0.0766026	0.145513	0.105632	0.531645	0.567995	0.360348	-0.0527473	-0.112317	0.411355	0.338004	0.491941	1	0.454212	-0.0527015	-0.176603	-0.0589286	0.538874	-0.101053
G44	0.334661	0.113462	0.411401	0.383837	0.332463	0.107326	0.591117	0.239469	0.0156593	0.490614	0.318727	-0.0674908	0.186355	0.193636	0.113233	0.108745	0.084707	0.413004	-0.554808	-0.200824	0.542766	-0.432051	0.434295	0.516667	-0.0103938	0.496795	0.351007	0.180495	0.45641	0.118681	-0.254625	-0.13837	0.0642857	0.0615842	0.353782	0.433471	0.341071	0.0105769	-0.0707875	0.253846	0.257738	0.514515	0.454212	1	-0.312958	-0.0211538	-0.0630952	0.459386	-0.183837
G45	-0.0485806	0.1038	-0.0284341	-0.0309066	-0.241209	0.105449	-0.187958	-0.0249084	-0.131685	-0.123443	-0.333104	0.0273352	-0.46131	-0.196474	-0.523306	0.147253	0.219093	-0.0607601	0.27413	-0.22239	-0.106639	0.123077	-0.00389194	-0.0111264	0.0195055	-0.0602564	-0.196474	0.081456	-0.311538	-0.109799	0.187225	-0.0285714	-0.0268315	-0.237271	-0.184595	-0.00659341	-0.239652	-0.35119	-0.195925	-0.097848	0.116163	-0.218178	-0.0527015	-0.312958	1	-0.356319	-0.00801282	-0.0455586	0.270055
G46	-0.127198	0.0798993	-0.0659799	-0.17381	-0.16424	-0.140064	-0.0940018	-0.0666209	-0.218498	-0.187592	-0.116804	-0.23315	0.482784	-0.0897894	0.646749	-0.341575	-0.173718	-0.175046	0.0639652	0.510073	-0.107875	0.200824	-0.25815	-0.321016	0.0260531	0.0331502	-0.131456	-0.137271	-0.00989011	-0.208379	0.111035	0.0674451	-0.082967	0.00251832	0.0248629	-0.167125	-0.120696	0.664286	-0.120238	-0.0164835	-0.0706502	-0.106777	-0.176603	-0.0211538	-0.356319	1	-0.286859	-0.163874	-0.21978
G47	-0.0121795	-0.154762	-0.0278388	-0.0639194	0.147985	0.321383	0.102793	0.0268773	0.284661	-0.0313645	0.116575	0.031456	-0.0390568	0.145238	-0.18054	0.0656593	-0.0889652	-0.130998	0.176374	-0.183745	-0.148626	-0.0475275	0.127793	0.089011	-0.0227564	-0.0141941	0.0021978	0.00137363	-0.0281593	0.207509	-0.162775	-0.0286172	0.276511	0.282601	-0.0525189	-0.0574634	0.0166209	-0.168178	0.264469	-0.264057	-0.13109	-0.0162546	-0.0589286	-0.0630952	-0.00801282	-0.286859	1	-0.0360348	0.430952
G48	0.357097	0.123489	0.286081	0.683974	0.485806	0.180723	0.460211	0.256044	0.182647	0.497894	0.388416	0.00567766	-0.0575549	0.300137	-0.164377	-0.0742674	0.040522	0.708013	-0.579487	-0.24359	0.637592	-0.487729	0.503709	0.411813	0.149954	0.512821	0.464057	0.585119	0.529258	0.26163	-0.136401	-0.0806319	0.183333	-0.0542582	0.613446	0.467033	0.270101	-0.0740842	-0.0864469	0.203434	0.448031	0.41163	0.538874	0.459386	-0.0455586	-0.163874	-0.0360348	1	0.0520147
G49	0.00728022	-0.0709249	0.104075	-0.102839	0.0898352	0.112637	0.0512821	0.0593864	0.188782	0.0119048	0.108837	0.162775	-0.127335	-0.0596154	-0.178755	0.0375	0.0114927	0.0353938	0.17152	-0.183104	-0.0576007	-0.0998168	0.168681	0.133333	-0.00540293	0.0340659	0.16946	0.0924451	-0.0374084	0.225229	-0.219093	0.0506868	0.0364011	-0.0804945	-0.121819	0.0789377	0.0717033	-0.347985	0.203617	0.115934	-0.105266	0.00929487	-0.101053	-0.183837	0.270055	-0.21978	0.430952	0.0520147	1
G50	0.532005	-0.1087	0.163462	0.27207	0.375412	0.0510531	0.324405	0.346886	0.367308	0.257509	0.28402	-0.0546245	-0.0675824	0.227198	-0.0125458	0.0980311	-0.0919414	0.42033	-0.223352	-0.256639	0.312912	-0.136126	0.349817	0.362958	0.206227	0.348031	0.463507	0.369277	0.307555	0.190659	-0.197894	0.00650183	-0.0547619	-0.0277473	0.391809	0.487683	0.415568	-0.15435	-0.150092	0.34478	0.125504	0.341621	0.392857	0.172848	-0.0108974	-0.139789	0.0234432	0.272436	0.24043
G51	0.196291	-0.0139652	0.00512821	0.543681	0.192811	0.0820513	0.268956	0.121703	0.0834249	0.305861	0.228755	0.167216	-0.130174	0.19446	-0.13109	-0.0283425	0.00851648	0.555037	-0.396108	-0.0684066	0.420055	-0.284936	0.283608	0.085989	0.1337	0.362683	0.167353	0.419643	0.429625	0.103388	0.104167	0.110852	0.11369	-0.254716	0.556279	0.267995	0.126007	0.015522	0.110211	0.108379	0.498535	0.380403	0.473947	0.230357	-0.0498168	-0.0223901	-0.196062	0.447161	-0.120696
G52	0.134707	0.0547161	0.0651099	0.29794	0.246658	0.144734	0.0982601	0.160485	0.106181	0.283562	0.16369	0.057967	-0.330128	0.213049	-0.451007	-0.0743132	-0.0394689	0.297024	-0.164286	-0.337958	0.215385	-0.0235806	0.223306	0.220513	-0.0111264	-0.0620421	0.0244963	0.092033	0.0714744	0.0879121	-0.0287546	-0.0484432	0.0696886	0.105815	0.0613789	0.102885	-0.0565934	-0.241712	-0.155586	-0.261401	0.437271	0.0550366	0.258333	0.0872711	0.0982143	-0.307738	0.232692	0.228892	0.120055
G53	0.180403	-0.0644231	0.118956	0.0565476	0.202198	0.0848901	0.166117	0.191987	0.0529304	0.163049	0.222024	-0.116896	-0.0613553	0.0501374	-0.0819597	-0.0123168	0.0762821	0.101374	-0.275733	-0.367811	0.301328	-0.256273	0.499817	0.194689	0.0757326	0.0948718	0.0817308	-0.0217949	0.114103	0.264652	0.0688187	-0.13837	0.121703	-0.0507326	0.125917	0.230586	0.202473	-0.0758242	-0.0021978	0.25435	0.0195055	0.137271	0.230357	0.197527	-0.0415751	-0.176419	-0.00370879	0.0201007	-0.0164377
G54	0.0373168	-0.14478	0.00384615	0.216392	0.228022	0.461767	0.194093	0.127976	0.0360348	0.296108	0.332555	0.433379	0.141209	0.260577	-0.0583333	0.179625	-0.0602106	0.138141	-0.264515	0.0953755	0.203297	-0.531273	0.0630952	0.264286	-0.0298993	0.100046	0.347848	0.127885	0.311767	0.12587	-0.112454	0.0924451	0.184295	0.179533	0.131183	0.0849817	0.14043	-0.221154	0.449451	0.00499084	0.0837454	0.230861	-0.0251374	0.202381	-0.206136	-0.170192	0.301969	0.202747	0.22239
G55	0.0507326	0.0380495	0.271932	-0.22413	0.00686813	-0.0669414	0.2038	0.134799	0.173031	0.0150641	-0.0568223	-0.166484	0.135943	-0.0690934	0.0646978	0.0199634	0.238919	-0.198489	0.0516026	-0.392857	-0.0699634	-0.0750916	0.113095	0.0997711	0.0994963	0.0873168	0.0346612	-0.198031	-0.015293	0.585302	-0.197161	0.10206	-0.256914	-0.0684982	-0.11376	0.0454212	0.18283	-0.167262	0.410256	0.234799	-0.265614	-0.144918	0.0485348	0.0704212	0.0192766	-0.0940476	0.15641	-0.10902	0.278342
G56	-0.069185	0.134066	-0.175	-0.0769689	-0.203159	0.0269231	-0.128388	-0.151328	-0.19794	-0.0830128	0.0326007	0.0455586	0.483929	0.0517399	0.669093	-0.266529	-0.0921245	-0.0111722	-0.0367674	0.372299	0.057967	-0.0702381	-0.142628	-0.316209	0.063141	-0.0736264	-0.11978	-0.0630952	0.106731	0.00384615	0.145833	0.184615	0.124222	0.105586	0.172644	-0.274038	0.0636447	0.660943	0.099359	0.00865385	0.0112179	-0.0705128	-0.00888278	0.122619	-0.528755	0.565568	-0.243361	-0.112454	-0.327198
G57	-0.137088	-0.198718	0.00508242	-0.31076	-0.104716	-0.0619963	-0.0822802	-0.240888	0.114881	-0.335577	-0.209524	-0.148306	0.00320513	-0.185211	0.0263278	0.262821	-0.0625916	-0.354304	0.307601	0.155037	-0.385531	0.555311	-0.222115	-0.0544414	-0.157418	0.0365842	-0.0923077	-0.100641	-0.161813	-0.337546	-0.220833	-0.177473	-0.0357601	0.0584707	-0.159777	-0.111401	-0.127335	0.0694597	-0.232189	0.0167582	-0.37848	0.0707875	-0.327564	-0.229396	0.110714	0.145696	0.109799	-0.195101	0.000595238
G58	0.638416	-0.0206502	0.406914	0.502793	0.611218	-0.0569597	0.617628	0.537408	0.341667	0.549405	0.422482	-0.149313	-0.0478938	0.277335	-0.0924908	-0.0404304	-0.0744048	0.485989	-0.44881	-0.496337	0.509844	-0.438004	0.616071	0.7038	0.144368	0.455495	0.661676	0.503068	0.397665	0.460256	-0.161905	0.0145604	0.00869963	-0.126053	0.488215	0.716117	0.468773	-0.155723	-0.0195513	0.461584	0.234249	0.371154	0.648489	0.342079	0.0852106	-0.258654	0.121154	0.419185	0.283974
G59	0.0502747	0.0130952	-0.0539377	0.0886447	0.00924908	-0.0237179	0.235119	-0.00837912	0.0452839	0.149588	0.0531136	0.0139652	0.630357	0.167995	0.787042	-0.0678571	-0.0718864	0.107326	-0.118727	0.376648	0.172161	-0.0117674	-0.121978	-0.0700549	0.191209	0.11891	0.100458	-0.0738553	0.298306	-0.0362637	0.06337	0.065522	-0.013141	-0.0208333	0.23519	0.0855311	0.209203	0.484066	0.102381	0.148901	0.0835165	0.136172	0.134112	0.194002	-0.534295	0.61044	-0.117353	-0.00274725	-0.209112
G60	0.55641	0.125641	0.337363	0.546291	0.483608	0.158196	0.446154	0.435714	0.0988553	0.333837	0.402839	-0.0910714	-0.034478	0.477976	-0.0366758	-0.0533425	-0.186905	0.554121	-0.452198	-0.241758	0.396566	-0.300458	0.336081	0.50261	0.207601	0.332647	0.432234	0.334432	0.360027	0.299908	-0.154762	-0.0791209	0.198214	0.0448718	0.43549	0.487683	0.216621	-0.0369048	-0.151236	0.129212	0.353205	0.284799	0.372894	0.470284	-0.142766	-0.0863553	0.0452839	0.551053	-0.0207875
G61	0.405815	0.177015	0.343269	0.310531	0.579533	0.0553571	0.578755	0.3087	0.271062	0.451786	0.522344	-0.135027	0.113828	0.206502	-0.107921	0.264377	-0.0663004	0.282234	-0.525595	-0.417216	0.461355	-0.277885	0.371749	0.592033	0.0342491	0.367262	0.39913	0.175229	0.491392	0.276328	-0.146245	-0.00998168	0.0809982	0.0803571	0.202841	0.553342	0.482005	-0.259341	0.068315	0.335394	-0.0205128	0.409066	0.480723	0.405907	-0.139469	-0.238278	0.0596154	0.333379	0.108196
G62	-0.264881	-0.0294414	-0.177106	-0.00554029	-0.0686355	0.211767	-0.175733	0.0489011	0.0538919	-0.00851648	-0.0331502	0.261996	-0.0421245	-0.0473443	-0.0569597	-0.113507	-0.114194	-0.214835	0.0874084	0.119597	-0.117857	-0.209066	-0.200962	-0.151648	-0.184203	-0.229396	-0.107555	0.0729853	-0.156227	0.107921	0.0111264	0.0345696	0.129853	0.266621	-0.0163234	-0.256273	-0.145513	-0.0395604	0.261264	-0.444597	0.0825092	-0.285806	-0.222161	-0.125504	0.0137821	0.0472527	0.41511	-0.111676	0.296703
G63	0.221154	0.229075	0.107555	0.449908	0.279762	0.247985	0.254625	0.12326	0.240568	0.300366	0.339057	0.140201	0.000869963	0.516255	-0.055815	-0.0786172	0.0766941	0.456181	-0.364927	-0.127289	0.335623	-0.405907	0.285485	0.201969	0.417995	0.218544	0.221474	0.183196	0.386126	0.362729	0.106593	0.363782	0.386584	-0.021337	0.307856	0.251923	0.191438	-0.0736264	0.171978	0.030174	0.232418	0.212958	0.287408	0.204853	-0.158883	-0.193727	0.0353938	0.368407	0.0384615
G64	0.129487	0.248993	0.260943	-0.0693681	0.0320055	0.1837	0.243956	0.116026	0.162134	0.201419	0.0554487	-0.0779304	0.288324	0.0854853	0.0845238	0.110027	0.425137	-0.09913	0.0653388	-0.491392	0.0492674	-0.221108	0.147436	0.214515	0.164011	0.0908883	0.073489	-0.118956	0.047207	0.555586	-0.244689	0.202335	-0.0812271	0.0388278	-0.076489	0.104212	0.140064	-0.272802	0.407967	0.208837	-0.258745	-0.0282051	0.198443	0.183608	-0.0233974	-0.231685	0.296566	0.0421245	0.196841
G65	-0.220971	-0.196474	-0.292995	-0.216667	-0.377335	-0.275137	-0.470101	-0.304625	-0.122619	-0.472894	-0.346474	-0.170604	-0.20728	-0.178022	-0.0826465	-0.303297	-0.234203	-0.186676	0.381639	0.29098	-0.393773	0.40293	-0.196932	-0.398352	-0.0421703	-0.19565	-0.326053	0.00700549	-0.445696	-0.292216	0.00750916	-0.0794414	0.0563645	-0.0857143	0.00945524	-0.348581	-0.332005	0.253663	-0.220055	-0.120192	-0.00315934	-0.238049	-0.245284	-0.337592	0.0925824	0.222024	-0.0756868	-0.103755	-0.0124084
G66	0.42587	0.0326923	0.486172	0.139881	0.248397	0.120879	0.429121	0.25348	0.412683	0.294826	0.192353	-0.133837	0.040293	0.155037	-0.00238095	0.0454212	0.233059	0.201007	-0.15902	-0.538004	0.266529	-0.374679	0.416071	0.386401	0.214148	0.304029	0.361951	0.213874	0.174588	0.654808	-0.140705	0.145696	0.0560897	0.00173993	0.259435	0.321108	0.317628	-0.128938	0.278434	0.320421	0.0145604	0.1337	0.29739	0.233471	0.0526557	-0.313416	0.308013	0.144093	0.286126
G67	0.268269	-0.079304	0.0862179	0.00673077	0.155357	-0.0658883	0.148077	0.22294	0.186218	0.0700092	0.21337	-0.20119	-0.0282051	0.0892399	-0.0703297	0.0419872	-0.268086	0.0727106	-0.13663	-0.155495	-0.0330586	-0.140201	0.0896062	0.175183	-0.0107143	0.19043	0.232005	-0.00764652	0.0625458	0.0131868	0.0697344	0.0128663	0.0486722	0.184707	-0.0416442	0.207463	0.000320513	0.0157967	-0.209203	-0.0384158	-0.0637363	0.112592	0.148031	-0.0353938	0.109524	-0.0429487	0.0582418	-0.0307692	0.0722527
G68	0.0941392	-0.0800366	0.278159	0.0766026	0.183883	0.290842	0.346886	-0.140385	0.240751	0.163736	0.0785256	-0.0562271	0.223764	0.113599	0.171658	0.451923	0.285027	0.110989	-0.137363	-0.0775641	0.236126	-0.0462454	0.133059	0.207326	0.065293	0.394277	0.214286	0.116529	0.298168	0.0331044	-0.364377	-0.122985	-0.060119	0.105723	0.156366	0.210668	0.305266	-0.162775	-0.0690934	0.318315	-0.141255	0.364606	0.171291	0.37935	-0.12413	-0.0741758	0.0118132	0.296703	0.0127289
G69	0.192399	0.0424451	0.0182692	-0.0179487	0.0304487	0.20641	-0.0584707	0.110027	0.089011	-0.0672161	0.0461081	-0.194505	-0.0533425	-0.0502747	-0.154899	-0.0410714	0.124405	0.0254579	0.234799	-0.189423	0.0395604	0.0918956	0.122619	0.0686355	0.0562271	0.0747711	0.131822	0.0475733	-0.125046	0.269093	0.0190476	0.264286	-0.00966117	0.0136447	-0.0835861	0.0489469	0.0539377	-0.195009	0.176282	0.197207	-0.309615	-0.0340659	-0.0976648	-0.159661	0.22848	-0.206731	0.152976	0.0441392	0.304625
G70	0.535577	0.0543956	0.3212	0.56337	0.657097	-0.0558608	0.605357	0.303388	0.509478	0.498672	0.455632	-0.0961996	-0.103663	0.294734	-0.0946886	-0.0404304	-0.151694	0.524359	-0.567857	-0.485394	0.601328	-0.289973	0.387592	0.641896	0.0216575	0.361493	0.517353	0.34913	0.464057	0.315797	-0.0324176	-0.0885073	0.0312729	0.0328297	0.425509	0.590888	0.436859	-0.149496	-0.0602106	0.254167	0.180815	0.36076	0.459478	0.362775	-0.101053	-0.317445	-0.0151557	0.314698	-0.00196886
G71	0.537225	-0.0350275	0.313462	0.544918	0.737866	0.0574634	0.692857	0.298306	0.360165	0.410027	0.615659	-0.124176	0.0776099	0.326877	0.0656593	0.0783425	-0.0950549	0.536905	-0.492903	-0.278938	0.598581	-0.425641	0.525412	0.513462	0.137958	0.487225	0.583929	0.350549	0.668544	0.276145	-0.293132	0.00457875	0.084707	0.137683	0.539406	0.703114	0.472665	-0.085348	0.125916	0.494002	0.13457	0.577152	0.580357	0.443498	-0.2663	-0.107738	0.0860348	0.43196	0.141804
G72	0.290201	0.259432	0.104853	0.323077	0.230586	0.196291	0.212866	0.26598	0.0581044	0.339973	0.197848	0.241163	0.00265568	0.215385	-0.100641	0.169826	0.289377	0.209112	-0.231685	-0.24011	0.269734	-0.133288	0.207875	0.321658	0.0201465	0.263874	0.250412	0.268498	0.125687	0.276511	0.203709	0.339332	0.329075	0.0754579	-0.00849369	0.194002	0.16859	-0.17152	0.175137	0.144734	0.0892399	0.0434524	0.130174	0.142353	0.141163	-0.170788	0.0929029	0.177839	0.180815
G73	0.339148	0.013141	0.184524	0.140797	0.374679	-0.153984	0.408379	0.0767399	0.125778	0.130815	0.380998	-0.185668	0.00357143	0.116529	0.0412546	0.149954	-0.13457	0.199405	-0.240659	-0.187958	0.191941	-0.200595	0.217308	0.386722	-0.0380952	0.245192	0.374038	-0.0513278	0.250687	0.175549	-0.253297	-0.00196886	-0.0924451	0.19826	0.0603487	0.305998	0.278388	-0.184249	0.0418956	0.262775	-0.00499084	0.251877	0.233516	0.240659	-0.199084	-0.0981227	-0.0319597	0.208608	0.00389194
G74	0.43141	-0.210714	0.457051	0.129441	0.463233	-0.1413	0.604716	0.290156	0.203984	0.261813	0.347573	-0.0834707	0.20989	0.218956	0.196841	0.0160714	-0.0801282	0.213736	-0.34533	-0.303159	0.213004	-0.305266	0.274542	0.46891	0.0289835	0.438874	0.483333	0.0638736	0.501648	0.350504	-0.424359	-0.0620421	0.0163462	0.121886	0.207443	0.456044	0.405678	0.0280678	0.113919	0.449542	-0.0481227	0.364469	0.314011	0.442399	-0.323123	-0.0343407	0.0579212	0.213965	0.0539835
G75	0.456639	0.120284	0.374176	0.500778	0.629167	0.152335	0.497436	0.289881	0.526786	0.544414	0.508974	-0.0771978	0.106227	0.337958	0.0494963	0.0320971	-0.0412088	0.547115	-0.563599	-0.168498	0.499222	-0.336401	0.286081	0.449863	0.0798535	0.503709	0.571337	0.328663	0.608242	0.2288	-0.103526	0.111493	0.0603938	0.0377289	0.474181	0.479853	0.472802	-0.0934982	0.0863095	0.185211	0.134249	0.488187	0.454212	0.272894	-0.267399	-0.0523352	-0.0549451	0.585531	0.0315476
G76	0.192125	0.0803114	0.475412	-0.0173993	0.107784	0.0651099	0.259249	0.276511	-0.0320513	0.0147436	0.0196429	-0.0983059	0.0683608	-0.0229853	-0.0269689	-0.11978	0.138324	-0.00554029	-0.103114	-0.148718	0.123764	-0.0958333	0.196749	0.160989	0.116026	0.122024	0.028022	0.0773352	0.0776557	0.25609	-0.026511	0.0014652	-0.0105311	-0.111813	-0.013622	0.147115	0.119231	0.108425	-0.106181	0.181456	-0.0672619	0.0785256	0.0139652	0.114148	0.064011	0.0826007	-0.12207	0.0484432	-0.0592949
G77	-0.0663919	0.170604	-0.125824	0.14185	-0.220467	-0.308242	-0.133654	-0.0559066	-0.304029	0.022207	-0.18924	0.128892	0.0184066	0.00398352	0.410302	-0.368178	-0.140934	0.247894	-0.0842949	0.412866	0.0980311	0.0577839	-0.142674	-0.158288	0.122299	-0.113599	-0.0456044	0.0737179	-0.0101648	-0.0875916	0.388645	0.0924451	0.0626832	-0.251374	0.263991	-0.120742	-0.016804	0.538049	-0.132372	-0.0788919	0.39098	-0.180174	0.0331502	0.0150641	-0.0751374	0.486035	-0.484386	0.0610348	-0.283196
G78	0.419505	0.0373626	0.232509	0.524451	0.530861	0.044826	0.502885	0.227244	0.365156	0.352015	0.323077	-0.197344	-0.152564	0.202793	-0.0417582	-0.0805861	-0.104991	0.511676	-0.501236	-0.299038	0.523947	-0.320696	0.399725	0.369139	0.0986264	0.512637	0.324405	0.273672	0.448077	0.139286	-0.201648	-0.140156	0.0233974	0.0159341	0.512964	0.506227	0.415064	0.00764652	-0.201374	0.151465	0.32152	0.302564	0.54739	0.395238	-0.0320513	-0.0722985	-0.0380495	0.494002	-0.0687271
G79	0.172161	0.15435	0.0584249	-0.0486722	0.0236722	0.178571	0.0425824	-0.0677198	-0.0988095	-0.180861	0.121245	-0.114789	0.196108	0.252839	0.199588	-0.152518	0.282875	-0.0733974	0.260806	-0.0930403	0.0143773	0.149679	0.0457418	-0.101603	0.237179	0.123672	-0.0150183	0.0711538	0.151465	0.285302	0.0153388	0.352381	0.285485	0.237271	-0.0384849	0.0160256	-0.197665	0.317582	-0.0368132	0.149954	-0.272848	-0.044185	0.0311813	-0.0858059	-0.119322	0.205769	0.0215659	0.00393773	-0.12935
G80	0.508013	0.126465	0.332005	0.585302	0.62239	0.141346	0.673718	0.397802	0.265659	0.567628	0.591667	-0.0209707	0.137271	0.355815	0.0734432	0.150733	0.0246337	0.570604	-0.620696	-0.29446	0.633929	-0.436081	0.589789	0.54707	0.161676	0.574771	0.539057	0.353846	0.601328	0.272894	-0.227106	-0.00595238	0.221337	0.120513	0.449524	0.625504	0.391484	-0.0520604	-0.0708791	0.420971	0.210027	0.53054	0.57793	0.563095	-0.257143	-0.103571	0.0400183	0.6038	0.0277473
G81	0.560073	0.0953297	0.418681	0.62381	0.438462	0.0871795	0.549405	0.382555	0.121383	0.516438	0.285302	-0.134844	0.0304487	0.263599	-0.0225275	-0.154808	-0.0410256	0.646383	-0.539194	-0.279212	0.531822	-0.422299	0.510623	0.552198	0.304533	0.551374	0.482463	0.530998	0.427427	0.275321	-0.0429029	-0.101557	0.0798077	-0.389515	0.610653	0.691392	0.30206	0.111905	-0.131136	0.304853	0.466896	0.340842	0.498168	0.515156	0.0940018	-0.0342949	-0.113233	0.57326	0.0232601
G82	0.420971	0.0384615	0.20641	0.466346	0.569139	-0.0826923	0.543727	0.154533	0.343727	0.325595	0.455311	0.0153846	0.0553571	0.192949	0.0923535	0.0214286	-0.132921	0.341987	-0.459158	-0.0817766	0.421612	-0.258883	0.166529	0.506685	-0.0283883	0.416071	0.516209	0.325916	0.500687	0.089011	-0.258883	-0.137958	0.0774267	0.0400183	0.378003	0.523031	0.350778	-0.169643	0.0373626	0.209158	0.103342	0.407326	0.284066	0.354258	-0.247848	0.0286172	0.0350733	0.475549	0.113416
G83	0.500916	0.178617	0.47207	0.380495	0.632005	0.0580586	0.554899	0.35902	0.272344	0.5587	0.326511	-0.264515	0.208974	0.330678	0.0701465	-0.0546245	-0.022207	0.475824	-0.453938	-0.297527	0.496291	-0.399863	0.387592	0.499359	0.13109	0.485394	0.505128	0.305952	0.463553	0.205815	-0.128938	-0.0157509	-0.0271062	0.0861722	0.24547	0.537408	0.47239	-0.00352564	-0.155907	0.318452	-0.00906593	0.375962	0.445009	0.451374	-0.191758	0.0174908	-0.089881	0.447436	-0.0599359
G84	0.0530678	0.106044	-0.072619	-0.041804	-0.147802	0.000595238	-0.102015	-0.0769231	-0.343864	-0.0921703	-0.0730311	-0.0302656	0.243773	0.0329212	0.0828755	-0.145696	-0.056044	-0.0847527	0.224405	0.056044	-0.040293	0.0656136	-0.170421	0.136401	0.221841	-0.279945	0.00947802	-0.0432692	-0.226419	0.0967949	-0.0348901	0.0997253	-0.0872253	-0.158425	-0.171339	-0.0473443	-0.141026	-0.0196429	0.111538	0.0700092	-0.0963828	-0.255174	-0.23869	-0.0115842	-0.0293498	0.144277	-0.0469322	-0.057967	0.0358974
G85	-0.188645	-0.0018315	-0.0760531	-0.291896	-0.24826	-0.105082	-0.0934524	-0.234799	-0.20293	-0.222756	-0.171658	-0.221566	0.58196	-0.0307234	0.623168	-0.338049	-0.139423	-0.248901	0.119963	0.453938	-0.178571	0.260073	-0.250046	-0.364789	0.0521062	-0.0180403	-0.167903	-0.147253	-0.0498168	-0.142766	0.109066	0.0460623	0.0914377	0.0362179	-0.00682242	-0.289377	-0.136859	0.89533	-0.106456	-0.0602106	-0.165385	-0.1462	-0.197573	-0.0761905	-0.382647	0.814377	-0.090293	-0.241712	-0.260073
G86	0.362683	-0.0506868	0.199451	0.0659341	0.23631	0.16131	0.218864	0.184341	0.217445	0.163782	0.385119	-0.121245	0.0207875	0.289332	-0.145238	0.125595	0.0907051	0.104853	-0.0952839	-0.234066	0.0823718	-0.160211	0.278434	0.17413	0.261035	0.357189	0.272711	0.245192	0.243727	0.33196	0.00137363	0.341071	0.322665	0.0921245	0.0407743	0.317445	0.198306	-0.0965201	0.19478	0.204121	-0.148764	0.341255	0.244689	0.107601	-0.130082	-0.330357	0.262912	0.151832	0.130586
G87	-0.0559524	0.179716	-0.171291	0.219322	-0.115842	0.04913	-0.131227	-0.00663919	-0.0738095	-0.110531	-0.226923	0.0852564	-0.221337	-0.00815018	-0.278388	-0.148672	0.184982	0.124679	0.115659	-0.159066	0.118819	0.00206044	-0.0641484	-0.144414	0.282189	-0.281639	-0.229396	0.0967033	-0.125137	0.198077	0.110852	0.0276099	-0.161355	-0.203114	0.0829909	-0.0442766	-0.11369	-0.248993	0.148672	-0.154304	0.149588	-0.365934	-0.142399	-0.142949	0.347115	-0.263645	-0.0127747	0.179121	0.0473443
G88	0.187821	-0.118681	0.0164835	0.329396	0.218086	-0.0675366	0.1212	0.0296703	-0.00572344	0.0961538	0.0144689	-0.15902	0.0813645	0.327656	0.145925	-0.138141	-0.0695513	0.289973	-0.0869505	0.020467	0.107738	-0.21543	0.0595696	0.0417582	0.239744	0.0679487	0.22413	0.140888	0.20783	0.168956	-0.145604	0.181777	0.0145147	0.0307692	0.430797	0.175046	0.167995	0.0576465	0.025641	0.0904304	0.264927	0.0444597	0.278663	0.113645	-0.168956	0.130266	-0.142857	0.2212	-0.243223
G89	0.342628	-0.0132784	0.216667	0.0661172	0.247665	0.078022	0.391346	0.382143	0.109661	0.123306	0.410897	-0.0992674	0.21891	0.330128	0.148397	-0.123168	0.0216117	0.236722	-0.31424	-0.2337	0.266117	-0.369185	0.358929	0.205174	0.326282	0.202656	0.367308	0.0115842	0.379212	0.505769	-0.0128205	0.22848	0.259249	0.0992674	0.35037	0.326603	0.228114	0.0664377	0.415888	0.273535	-0.138324	0.304121	0.28869	0.244231	-0.390522	-0.0092033	0.261172	0.147344	0.186538
G90	0.409478	0.162866	0.300687	0.340247	0.661447	-0.00471612	0.605082	0.272802	0.358333	0.433471	0.618956	-0.109661	0.257967	0.34794	0.151648	0.121383	-0.119139	0.297344	-0.427656	-0.185943	0.367811	-0.167033	0.265018	0.529121	0.202427	0.42674	0.491896	0.227656	0.5788	0.227381	-0.214652	0.0842949	0.0797619	0.120284	0.208816	0.586264	0.439881	-0.0825549	0.101557	0.375595	-0.103251	0.497344	0.43631	0.289515	-0.336355	0.00462454	0.0488553	0.274313	0.103938
G91	0.298535	-0.130357	0.345009	0.325366	0.489332	-0.0711081	0.439332	0.328342	0.161447	0.350275	0.398306	-0.145009	-0.108562	0.173672	-0.189469	0.200046	-0.00755495	0.438278	-0.569139	-0.251648	0.560943	-0.357372	0.485714	0.496978	0.0574176	0.458059	0.515842	0.265751	0.458196	0.091804	-0.121016	-0.0916667	-0.0699176	-0.000412088	0.296524	0.556181	0.261996	-0.303159	-0.124679	0.349267	0.175137	0.534341	0.458059	0.497756	-0.0701923	-0.212912	-0.210073	0.561859	-0.0278846
G92	0.425549	0.0853938	0.226419	0.564057	0.414332	0.181181	0.424817	0.266346	0.238233	0.280082	0.393773	-0.070467	-0.0245421	0.370833	-0.0720696	-0.0360348	0.0717491	0.584661	-0.409386	-0.0949634	0.486264	-0.382005	0.440522	0.266026	0.37935	0.548031	0.462546	0.484844	0.540247	0.199405	-0.0539835	0.0552198	0.184799	-0.11369	0.623588	0.588828	0.29098	-0.0317766	0.0543956	0.330357	0.338919	0.503709	0.497115	0.33109	-0.0685897	-0.0168498	-0.0244048	0.63956	0.0299451
G93	0.439377	0.0658883	0.220055	0.341209	0.424679	-0.0797161	0.394139	0.284524	0.257555	0.446703	0.460027	-0.149817	-0.0481227	0.163507	-0.156502	-0.0937271	0.0750916	0.363736	-0.30641	-0.509753	0.401923	-0.223214	0.348581	0.390522	0.0606685	0.474084	0.394231	0.304487	0.424542	0.252518	-0.119597	0.014881	0.0565476	0.0563645	0.145492	0.497527	0.168498	-0.0945971	-0.154762	0.326923	0.109203	0.412637	0.535211	0.306685	-0.0912088	-0.207601	0.0306319	0.345009	0.0186813
G94	0.40609	0.0184982	0.30989	0.300366	0.29011	0.328068	0.474634	0.137088	0.325641	0.480861	0.420788	0.0743132	0.233471	0.342949	-0.000228938	0.424313	0.145467	0.299267	-0.31543	-0.331044	0.326145	-0.518773	0.315064	0.490568	0.114011	0.344048	0.436264	0.221062	0.334341	0.407555	-0.168819	0.131227	0.116667	0.163095	0.247507	0.306181	0.315888	-0.317399	0.27587	0.314148	-0.0324176	0.335668	0.365156	0.392766	-0.103068	-0.423581	0.233516	0.288141	0.132005
G95	0.00206044	0.0660714	0.00989011	-0.0471612	-0.139057	0.0718864	0.0569139	-0.122619	-0.203571	0.0180861	0.0164377	-0.141026	0.658471	0.176786	0.624954	-0.29565	-0.124542	0.00480769	-0.128846	0.359112	0.0646062	0.0142857	-0.151419	-0.214606	0.139698	0.119231	0.0148352	-0.00434982	0.1837	0.00485348	0.229075	0.166758	0.175687	0.030174	0.156252	-0.145238	-0.0280678	0.831685	-0.0172619	-0.0458791	-0.0245421	-0.0640568	-0.0566392	0.141529	-0.399634	0.717628	-0.134707	-0.0161172	-0.278159
G96	-0.150137	0.00169414	-0.0879121	-0.232097	-0.242308	-0.0863095	-0.0861264	-0.195742	-0.192399	-0.153984	-0.171337	-0.153571	0.561584	-0.0319139	0.604029	-0.339332	-0.144322	-0.188965	0.0780678	0.457234	-0.136813	0.256319	-0.245604	-0.350366	0.0369963	0.00622711	-0.153617	-0.0927656	-0.0159799	-0.126786	0.140339	0.0700549	0.107875	0.00489927	0.0481004	-0.270559	-0.0908883	0.903297	-0.111172	-0.0584249	-0.0896978	-0.137225	-0.18054	-0.0637363	-0.356227	0.79533	-0.137408	-0.199817	-0.262729
G97	-0.216117	0.0547619	-0.123352	-0.249405	-0.377701	-0.256181	-0.26543	-0.258929	-0.313049	-0.258013	-0.340522	-0.181044	0.200824	-0.183196	0.3788	-0.351969	-0.149863	-0.130174	0.162134	0.453709	-0.225687	0.441026	-0.270788	-0.416209	-0.0146978	-0.0819139	-0.253068	-0.10554	-0.215522	-0.352701	0.300458	-0.0336538	0.0757326	-0.190018	-0.0227567	-0.264973	-0.20957	0.78544	-0.401969	-0.198672	0.0592033	-0.224405	-0.203617	-0.175916	-0.0539377	0.70261	-0.322848	-0.252701	-0.29217
G98	-0.136355	-0.126969	-0.0830586	-0.122985	-0.210256	-0.165797	-0.162363	-0.173306	-0.26598	-0.167903	-0.225641	-0.23109	0.345147	-0.0167582	0.481548	-0.398168	-0.306273	-0.0376374	0.04913	0.46044	-0.194505	0.218681	-0.139194	-0.312134	0.0282967	0.0370421	-0.12381	0.00874542	-0.0779762	-0.217857	0.1125	-0.0657967	0.0474359	-0.191804	0.174155	-0.218773	-0.0760989	0.858288	-0.178892	-0.0372253	0.107143	-0.0830586	-0.0934066	0.00865385	-0.290797	0.732463	-0.210897	-0.113462	-0.262958
G99	0.0646985	0.108426	0.0134388	-0.0241761	0.0153848	0.00425829	0.186724	-0.0022894	-0.0567543	0.0523587	0.156092	-0.0679495	0.645726	0.00993601	0.727069	-0.171499	-0.0385993	0.0160716	-0.110693	0.325484	0.11376	-0.00011447	-0.109388	-0.117469	0.104397	0.289724	0.113188	-0.0757106	0.279605	-0.0403393	-0.0735127	0.129008	0.0559072	0.0396754	0.134206	0.0858068	0.281665	0.584553	-0.0340892	0.293479	-0.114081	0.158015	0.0609668	0.195286	-0.479653	0.716904	-0.242745	0.0231001	-0.170767
G100	0.311813	0.0639652	0.173077	0.453114	0.410348	0.0959249	0.333516	0.0855769	0.17152	0.295009	0.401786	-0.0164377	-0.00705128	0.196932	-0.00911172	-0.0173535	0.00297619	0.344826	-0.265751	-0.0747253	0.289515	-0.314835	0.255357	0.347436	0.0826007	0.467537	0.459982	0.426969	0.384249	0.048489	-0.145055	0.129899	0.159982	0.0433608	0.426333	0.454487	0.34446	-0.0457875	0.138187	0.332463	0.153114	0.421612	0.41076	0.282875	-0.104029	-0.0159341	-0.0397894	0.417125	0.0352564
G101	0.518727	0.12326	0.39098	0.583333	0.492903	0.274267	0.63402	0.359341	0.321749	0.568452	0.465293	-0.0225733	0.212408	0.349817	-0.0586996	0.17848	0.207189	0.501694	-0.472436	-0.43663	0.610943	-0.446474	0.415568	0.500595	0.156502	0.463645	0.574222	0.480082	0.497619	0.478846	-0.249771	0.00796703	0.107601	-0.0483059	0.385902	0.630861	0.376099	-0.20696	-0.0101648	0.341071	0.221795	0.354533	0.513874	0.470925	-0.12413	-0.229899	0.0284341	0.556548	0.171978
G102	-0.0511905	0.102473	0.0342949	-0.352015	-0.0997711	-0.149451	-0.00741758	-0.236355	0.0084707	-0.31946	-0.10989	-0.452335	0.0891941	-0.166209	0.131639	0.0640568	0.0780678	-0.284341	0.220604	0.0132326	-0.141529	0.459707	-0.141758	-0.186767	0.0724817	0.16772	-0.3087	-0.231273	-0.105952	-0.133654	-0.120101	-0.0448718	-0.128663	0.128617	-0.298401	-0.0168956	-0.0192766	0.114652	-0.251419	0.0944597	-0.431639	-0.0601648	0.00521978	-0.0512821	-0.0084707	0.237912	-0.101969	-0.213507	-0.196841
G103	0.535394	0.0333333	0.416529	0.169505	0.530037	-0.100366	0.598718	0.429579	0.305998	0.340568	0.451832	-0.267949	0.11978	0.302793	0.00686813	0.142353	-0.0578297	0.246383	-0.281822	-0.373077	0.300366	-0.144414	0.392353	0.491667	0.0513278	0.432418	0.523031	0.160027	0.450366	0.234066	-0.233333	-0.0255495	-0.0224817	0.138233	0.0653854	0.560165	0.439515	-0.133562	-0.0561813	0.387637	-0.172665	0.426007	0.418086	0.341484	-0.151099	-0.175458	0.0978022	0.178022	0.0880952
G104	-0.265888	-0.0505952	-0.15119	-0.352381	-0.197619	-0.198947	-0.233379	-0.325046	0.0248168	-0.356319	-0.165842	-0.226328	0.175183	-0.215522	0.378892	-0.0714286	-0.202289	-0.243544	0.30902	0.520879	-0.326969	0.547802	-0.294322	-0.359478	-0.0576923	-0.00782967	-0.209524	-0.168636	-0.111584	-0.480952	-0.104167	-0.106685	-0.124679	0.0656593	-0.0993372	-0.213095	-0.0851648	0.405495	-0.302839	-0.0326465	-0.302152	0.117537	-0.233059	-0.188416	-0.248993	0.53402	-0.191071	-0.23109	-0.133883
G105	0.430128	0.0826007	0.225229	0.661538	0.369139	0.0646062	0.436355	0.360577	0.243727	0.571978	0.437088	0.0953297	-0.0757784	0.288736	-0.130082	-0.137958	-0.125229	0.752564	-0.64565	-0.239194	0.685027	-0.399451	0.376694	0.402518	0.250046	0.472344	0.532189	0.552564	0.50293	0.294918	0.214927	0.0173993	0.204762	-0.154625	0.602892	0.513095	0.165614	0.0305861	-0.0382784	0.258608	0.484661	0.371658	0.502289	0.311859	-0.00869963	-0.0583791	-0.141026	0.69391	0.108333
G106	-0.054533	0.0817766	-0.174222	0.110256	-0.244551	0.0821886	-0.0835165	-0.119872	-0.244689	0.0696429	-0.00815018	0.212454	0.290659	0.0930861	0.475733	-0.128434	-0.056044	0.169093	-0.153251	0.378709	0.132738	-0.131777	-0.0715659	-0.168773	0.148077	0.108791	0.0245421	0.0964286	0.108242	-0.186722	0.323901	0.0854853	0.281914	-0.106731	0.215753	-0.0672161	0.00599817	0.564927	-0.0465201	0.00270147	0.324725	0.0111722	0.0411172	0.191667	-0.284844	0.38924	-0.307189	0.0589744	-0.360943
G107	-0.00897436	-0.0625	-0.0277473	-0.12033	0.0300366	-0.184203	0.0546245	0.0737637	0.00856227	-0.0676282	-0.0409341	-0.048489	0.105311	0.0733059	0.0735806	-0.113645	0.0107143	-0.0766941	-0.00238095	0.0264194	-0.0335165	0.0663919	0.0468407	-0.00608974	0.12848	-0.00695971	-0.0392399	0.0776557	-0.0110806	-0.0478938	0.163187	0.112134	0.271841	0.07413	-0.0448723	-0.0462454	0.0670788	0.141209	0.0625	0.128526	-0.240797	0.0681777	-0.0240385	-0.162775	-0.0807692	0.146566	0.0719322	-0.124405	-0.0197344
G108	-0.072207	-0.160256	0.133974	-0.197482	-0.0203755	0.108059	0.0628205	-0.0815934	0.0297619	-0.00320513	-0.0170788	-0.0536172	0.564103	0.120742	0.51076	-0.159066	-0.0223443	-0.119918	-0.05087	0.164332	-0.10728	-0.224542	-0.0646062	-0.120009	0.0858516	-0.0651099	0.0236264	-0.239789	0.02587	0.307967	-0.0540751	0.0113553	-0.0494963	-0.0637363	0.0290525	-0.18283	0.117216	0.367262	0.275641	0.00416667	-0.107051	-0.0458333	-0.141941	0.133608	-0.55641	0.289698	0.15	-0.140064	0.021978
G109	0.340888	0.11337	0.180861	0.237775	0.32706	-0.0779762	0.352381	0.241804	0.391896	0.268773	0.186859	-0.183883	-0.0467033	0.127198	-0.180769	-0.108059	0.117353	0.347436	-0.222527	-0.292811	0.327244	-0.0771978	0.30261	0.345788	0.196291	0.350046	0.338462	0.203846	0.343864	0.293681	-0.236676	0.116941	0.0247711	-0.226419	0.19856	0.463278	0.29098	-0.08837	-0.0103938	0.176832	0.0823718	0.320742	0.312317	0.198443	0.0864469	-0.25119	0.0593407	0.369002	0.230403
G110	0.47033	-0.021337	0.38489	0.474084	0.38663	0.150504	0.390201	0.34359	0.122665	0.279625	0.292491	-0.252976	0.0677656	0.269277	-0.0655678	-0.0792125	-0.153434	0.440156	-0.389332	-0.237592	0.410302	-0.335897	0.353526	0.338004	0.357692	0.38054	0.380769	0.436081	0.371474	0.277335	-0.132051	-0.0148352	0.0594322	-0.111401	0.589819	0.642216	0.335119	0.0357143	-0.156731	0.267491	0.253159	0.290705	0.485943	0.390568	0.0957418	-0.0965201	-0.089011	0.419002	0.00650183
G111	-0.162134	-0.0629579	-0.151969	-0.223168	-0.275549	-0.23631	-0.182601	-0.255815	-0.235211	-0.278571	-0.177885	0.0108516	0.0778388	-0.110211	0.275412	-0.233562	-0.121062	-0.16131	0.209158	0.252885	-0.166896	0.314423	-0.292262	-0.401099	-0.193819	-0.251053	-0.214835	-0.195147	-0.15119	-0.100458	0.244918	0.0881868	0.00581502	0.228205	-0.0715896	-0.404441	-0.177427	0.455174	-0.0585623	-0.256822	-0.078663	-0.375275	-0.189332	-0.213965	-0.169322	0.395101	-0.0180403	-0.340842	-0.0869048
G112	0.374981	-0.0579448	0.307352	0.139722	0.361016	0.0267402	0.384986	0.3052	0.123284	0.24531	0.415733	-0.189746	0.28123	0.0143088	0.0519237	0.0828535	-0.0560217	0.0650648	-0.0928124	-0.264357	0.154123	-0.276148	0.210717	0.341213	-0.00636454	0.336199	0.426172	0.17269	0.182168	0.28748	-0.380201	-0.00744056	-0.198766	0.0485125	0.052199	0.43675	0.29634	-0.161495	0.0723452	0.429996	-0.170744	0.162067	0.330727	0.246225	-0.0709944	-0.0564567	0.0835861	0.13567	0.326057
G113	0.531462	0.102313	0.174178	0.662393	0.485537	0.141416	0.485582	0.31129	0.12404	0.424959	0.429813	0.019872	0.0773589	0.577456	0.0964297	-0.184205	-0.104076	0.602228	-0.393755	-0.01598	0.441489	-0.312069	0.26493	0.360696	0.379652	0.402912	0.434849	0.406575	0.59758	0.267036	-0.0128664	0.224384	0.281734	-0.0358521	0.473362	0.48169	0.254742	0.162273	-0.0132785	0.149773	0.401813	0.367197	0.399226	0.307307	-0.183656	0.109067	0.00512826	0.502272	-0.0916906
G114	0.53576	-0.155082	0.517308	0.306136	0.5913	0.031044	0.619826	0.405632	0.373535	0.33489	0.380769	-0.397161	0.0643773	0.24011	0.00425824	-0.0269231	-0.167262	0.370147	-0.425595	-0.360165	0.432555	-0.339194	0.543132	0.558196	0.0754579	0.580861	0.58109	0.408471	0.377701	0.318498	-0.17152	-0.0456502	0.0758242	0.0980769	0.417587	0.616712	0.496291	-0.00489927	-0.0174451	0.414927	-0.00151099	0.51685	0.43489	0.363278	-0.0903388	-0.0842949	0.199038	0.395192	0.186767
G115	0.333837	0.354441	0.131639	0.0998168	0.171474	0.186355	0.16685	0.174908	0.0923077	0.240018	0.249679	-0.0126374	0.0915293	0.247253	0.0337454	-0.0319139	0.317399	0.0614927	-0.029533	-0.393315	0.094826	-0.35989	0.133379	0.180907	0.219551	0.083837	0.158059	0.0792582	0.202701	0.553114	0.0796245	0.485302	0.25728	0.161859	0.0574182	0.157921	0.0643315	-0.242399	0.424359	0.0209707	-0.143956	-0.047619	0.217125	0.0417582	-0.0145604	-0.147436	0.261126	0.112408	0.115018
G116	0.502976	0.141438	0.31978	0.581685	0.372711	0.131548	0.403846	0.247894	0.146841	0.49272	0.325595	-0.151419	-0.0195971	0.308104	-0.144505	-0.0811813	-0.0224817	0.583471	-0.417903	-0.143727	0.487179	-0.457738	0.267079	0.373397	0.190842	0.426923	0.522115	0.520421	0.372802	0.238645	0.0737179	0.0444597	0.173168	-0.174496	0.583844	0.5212	0.156502	-0.00586081	0.0326007	0.234203	0.240934	0.292079	0.383196	0.309799	-0.104487	-0.0848901	-0.110806	0.531273	0.00494505
G117	0.342537	0.33054	0.275412	0.159432	0.186493	0.260989	0.274725	0.0672619	-0.0571429	0.214011	0.278846	-0.0342491	0.0949176	0.398855	0.0923535	0.0867216	0.509936	0.233379	-0.162637	-0.216026	0.303892	-0.212179	0.274863	0.146978	0.415476	0.304304	0.197665	0.187775	0.38956	0.335623	0.117811	0.537317	0.571245	0.187225	0.206229	0.273672	-0.0283883	0.0835623	0.0439103	0.165659	0.118498	0.253022	0.323764	0.244689	-0.0815476	0.0407509	0.0716575	0.271703	0.000641026
G118	0.374038	-0.174496	0.257601	0.289973	0.383288	-0.00105311	0.410119	0.398352	0.124176	0.236951	0.28315	-0.114194	-0.115614	0.20728	-0.212683	-0.0528846	-0.189011	0.393727	-0.439835	-0.301053	0.345559	-0.346016	0.551053	0.499267	-0.024359	0.314148	0.390842	0.273626	0.288645	0.223123	-0.187958	-0.0831044	0.115476	-0.102885	0.339954	0.405311	0.220604	-0.0106227	-0.0826465	0.16369	0.272024	0.437225	0.301511	0.377747	0	-0.214789	0.132601	0.340568	0.308471
G119	0.171658	-0.0630495	0.199771	0.0929945	0.197115	0.278617	0.253022	0.215568	0.0307692	0.133516	0.209112	0.184066	0.0291667	0.16717	-0.0687729	0.0884615	0.0576465	0.166484	-0.178114	-0.213645	0.222711	-0.277244	0.251099	0.172802	0.228755	0.157097	0.10609	0.0578755	0.295467	0.209295	-0.275687	0.0188187	0.164148	-0.0731227	0.175391	0.20609	0.19043	-0.0269231	0.118773	0.117537	0.279579	0.178388	0.200778	0.144231	0.0435897	-0.191712	0.275733	0.10293	0.214652
G120	-0.249725	-0.0021978	-0.149496	-0.224176	-0.243315	0.0477564	-0.161905	-0.19652	-0.275366	-0.258883	-0.231868	-0.0209249	0.508654	0.0143315	0.635943	-0.175229	0.0571429	-0.270604	0.170467	0.527015	-0.232143	0.01163	-0.277793	-0.375733	0.116621	-0.0558608	-0.176694	-0.252839	-0.0829212	-0.11076	-0.0218407	0.102015	0.0120421	-0.0192308	-0.0807015	-0.25696	-0.0789377	0.541392	0.118223	0.0426282	-0.00361722	-0.14043	-0.247482	-0.00499084	-0.359158	0.68196	-0.186951	-0.169139	-0.116896
G121	0.551511	0.18837	0.30902	0.698718	0.535714	0.171291	0.575733	0.373077	0.203526	0.651557	0.520147	0.0831044	0.0626374	0.440522	0.00755495	-0.0294414	-0.0482143	0.733288	-0.560577	-0.241667	0.704029	-0.439973	0.513233	0.498581	0.162866	0.442491	0.560027	0.531044	0.670467	0.261035	0.0208791	0.0279762	0.209478	-0.104716	0.517108	0.622436	0.286401	0.0460165	-0.124451	0.282692	0.413095	0.420238	0.536584	0.474908	-0.104991	-0.0627289	-0.115842	0.569414	0.0402473
G122	0.317311	0.0240387	0.274957	0.348058	0.436978	0.0658432	0.325713	0.167607	0.146156	0.318754	0.220996	-0.0584485	0.0250003	0.192882	0.0183839	-0.0958573	0.0572809	0.417335	-0.305292	-0.189929	0.291899	-0.27395	0.441466	0.32988	0.279765	0.365343	0.302476	0.295081	0.427248	0.121224	-0.305429	0.00139654	0.0418961	-0.121407	0.37913	0.455202	0.422601	-0.0120881	-0.110258	0.366282	0.219096	0.425966	0.418091	0.427867	-0.156298	-0.103252	-0.105015	0.496251	0.0354629
G123	0.310256	-0.00755495	0.0751374	0.357555	0.287546	-0.0390568	0.360668	0.271474	-0.0159341	0.232601	0.064881	-0.20174	-0.0944597	0.107418	-0.0800824	0.00554029	-0.19533	0.361584	-0.300458	-0.135073	0.329991	-0.19011	0.364698	0.346245	0.11772	0.29098	0.167995	0.275229	0.175412	0.0278388	0.029304	-0.176694	0.137637	-0.152015	0.365641	0.455907	0.225183	0.138828	-0.281914	0.285165	0.266896	0.187134	0.423443	0.265751	0.22065	-0.020696	-0.0548535	0.347161	-0.0360348
G124	0.330174	-0.0175366	0.266163	0.291804	0.486676	0.127381	0.53956	0.435119	0.361538	0.124359	0.404808	0.0193681	0.06163	0.208333	0.0954212	0.144368	-0.000732601	0.279258	-0.34359	-0.157784	0.386584	-0.265888	0.311538	0.375687	0.0913004	0.454991	0.441712	0.24707	0.591209	0.0405678	-0.272207	0.0452839	0.137271	0.299588	0.289861	0.464927	0.447253	-0.0793498	0.1	0.311722	-0.0766484	0.453571	0.244231	0.37848	-0.183883	0.00879121	0.150733	0.300778	0.0503663
G125	-0.00274725	-0.0621795	-0.045467	-0.307647	-0.0415751	-0.134753	-0.0403846	0.0215659	-0.0657509	-0.137317	0.0424451	-0.212454	0.0845238	-0.255082	0.181319	0.139148	-0.01337	-0.197253	0.0911172	0.242216	0.0113095	0.357463	-0.0486264	-0.162317	-0.0803114	0.154121	-0.111584	-0.174954	0.055174	-0.252015	-0.000549451	-0.109203	-0.264332	0.129441	-0.117446	-0.0420788	-0.0436813	0.150275	-0.237683	0.178892	-0.311722	0.174359	0.0667125	-0.0318223	-0.0542125	0.279212	-0.333883	-0.168452	-0.340064
G126	0.662821	0.167491	0.36717	0.50957	0.656822	0.0382784	0.646108	0.351328	0.311996	0.458333	0.49739	-0.217445	0.183379	0.511859	0.0714744	0.00796703	-0.0513736	0.490888	-0.486172	-0.376328	0.506639	-0.224817	0.381593	0.537592	0.371795	0.535714	0.459615	0.285852	0.684753	0.352793	-0.0909799	0.195833	0.0717491	0.0603938	0.361085	0.659615	0.386126	0.0010989	-0.00416667	0.444505	0.0607143	0.486538	0.555403	0.352793	-0.217949	0.0139194	-0.0809524	0.439606	-0.122619
G127	0.350458	0.0766941	0.411676	0.137546	0.442903	-0.00430403	0.628846	0.0712454	0.268956	0.443819	0.432555	-0.0190934	0.325412	0.147756	0.228388	0.335852	0.00288462	0.133425	-0.322573	-0.158059	0.271566	-0.181364	0.129258	0.448535	-0.00604396	0.398901	0.426832	0.0561355	0.459066	0.16978	-0.294872	-0.135852	0.0174451	0.0809982	0.0384162	0.446658	0.234158	-0.0427656	-0.0548993	0.367674	-0.197711	0.336355	0.232234	0.275962	-0.225092	0.0252289	-0.0370421	0.159478	0.097207
G128	0.467537	-0.027793	0.449222	0.298168	0.538278	0.141438	0.505952	0.147711	0.374634	0.521337	0.437592	-0.070696	0.186767	0.189057	0.0608516	0.24565	-0.00902015	0.301236	-0.361676	-0.299222	0.301007	-0.32935	0.317949	0.536401	-0.0286172	0.488736	0.544048	0.357784	0.464652	0.24446	-0.267582	-0.0548077	-0.0684982	0.0770604	0.231985	0.441575	0.455998	-0.0791209	0.00938645	0.400641	-0.0708791	0.430998	0.412317	0.296383	-0.218315	-0.196154	-0.00934066	0.300137	-0.0386905
G129	0.449771	0.071978	0.366758	0.261493	0.477701	-0.0233516	0.362866	0.26337	0.212821	0.238416	0.421062	-0.0197344	-0.0333333	0.273443	-0.0641026	0.015293	0.00558608	0.271016	-0.287683	-0.387958	0.267811	-0.174222	0.331456	0.346245	0.106136	0.257143	0.297024	0.259249	0.432601	0.165476	-0.0797161	0.0302656	0.089652	0.0979396	0.1897	0.473443	0.250641	-0.0880037	-0.229762	0.269277	0.134066	0.354441	0.417033	0.208654	-0.0766026	-0.127427	-0.0680403	0.258379	-0.0138736
G130	-0.0660714	-0.0317766	-0.180128	-0.155632	-0.269277	-0.114515	-0.268636	0.0150641	-0.24565	-0.220925	-0.143773	0.0394231	-0.0909799	-0.0336081	-0.208837	0.15119	0.0513278	-0.171658	-0.025	-0.0507784	-0.259295	0.0529762	-0.142353	-0.0326007	-0.030815	-0.167262	-0.0766941	-0.129716	-0.247161	0.0538919	0.235668	0.230632	0.0507326	-0.171566	-0.191944	-0.18924	-0.210256	-0.162134	0.271658	-0.0687729	-0.168452	-0.186859	-0.246062	-0.21685	0.0833333	-0.150092	-0.167949	-0.172802	-0.0749542
G131	0.424313	0.0115385	0.141575	0.619643	0.516621	-0.0572802	0.301282	0.175962	0.298352	0.444277	0.368452	0.00288462	-0.0300366	0.319139	0.110943	-0.220375	-0.211035	0.582555	-0.515293	-0.0216117	0.404029	-0.351282	0.312637	0.262729	0.0554029	0.453984	0.37706	0.583791	0.557418	0.187546	-0.0524267	0.124359	0.173443	0.0157051	0.68879	0.350183	0.325321	0.170147	0.000824176	0.107738	0.423626	0.343544	0.478068	0.338874	-0.283196	0.0721154	-0.130266	0.620513	-0.146978
G132	0.0693223	0.201374	-0.0190018	0.17065	0.0915751	0.00728022	0.0760073	0.226145	-0.00966117	0.0929029	0.0843407	-0.0956044	0.0387821	-0.165522	-0.122619	-0.12326	-0.00425824	0.0442308	-0.0979853	-0.146841	0.155403	0.0855311	-0.0158425	0.0673535	-0.104762	-0.0871337	0.052381	0.0168956	-0.101419	0.108974	0.132875	0.0869048	-0.0404762	0.0201923	0.0128664	0.212912	0.11891	-0.172115	0.125321	-0.10467	0.00407509	-0.135714	-0.0958791	0.0979396	-0.110943	-0.0332418	0.0634158	-0.0179029	0.00911172
G133	0.185348	-0.103388	0.0974817	0.134478	0.199725	0.03663	0.233516	0.231822	0.15957	0.146016	0.192033	-0.03663	0.163828	0.222711	0.160943	0.0343864	-0.142353	0.249084	-0.339469	-0.0270604	0.178984	-0.31131	0.29272	0.195009	0.210897	0.314744	0.336264	0.347344	0.300092	0.0923993	-0.106319	0.101511	0.200092	0.186584	0.368319	0.142857	0.249634	0.235027	0.11543	0.181868	0.141484	0.333104	0.286538	0.153205	-0.0605311	0.0408883	0.109799	0.295788	0.119643
G134	0.49043	-0.0638736	0.494872	0.394734	0.607738	0.157601	0.721749	0.372207	0.282509	0.425137	0.628709	-0.074359	0.271658	0.326007	0.194918	0.115156	-0.0114927	0.462958	-0.558059	-0.230357	0.564744	-0.462363	0.485577	0.544048	0.0961996	0.633288	0.567903	0.235027	0.671062	0.359524	-0.251145	0.103617	0.116896	0.194597	0.314679	0.554258	0.456731	-0.0461081	0.0907509	0.389927	0.0152015	0.603846	0.390888	0.587042	-0.387592	-0.0566392	0.117445	0.529899	0.124267
G135	-0.190293	0.0298993	-0.0855311	-0.212683	-0.102793	-0.296841	-0.15174	-0.204533	-0.196886	-0.408883	-0.194139	-0.251419	0.190476	-0.0427656	0.292262	-0.18457	-0.0462454	-0.22619	0.284982	0.24533	-0.293727	0.335394	-0.229441	-0.402656	0.121337	-0.245879	-0.410577	-0.271016	-0.151053	-0.333654	0.0136447	0.00924908	0.000503663	0.181685	-0.223514	-0.145971	-0.084478	0.201923	-0.192262	-0.0755495	-0.282097	-0.252473	-0.161676	-0.122115	-0.234112	0.356456	-0.0660714	-0.294002	-0.257601
G136	0.137982	0.0202154	0.184274	-0.0925148	0.308451	-0.14817	0.176444	0.317746	0.0472991	-0.0170561	0.289564	-0.20046	-0.0909351	-0.18171	-0.139242	-0.0139196	-0.0288694	-0.0893783	-0.090958	-0.198377	0.119163	0.0168042	0.316533	0.328873	-0.00700557	0.10442	0.190982	-0.0513055	0.143431	-0.0498174	-0.351629	-0.0394006	-0.195172	0.0461544	-0.0379816	0.404583	0.196477	-0.255383	0.00260992	0.337733	-0.175941	0.375096	0.137547	0.150048	0.0257558	-0.0447349	-0.127016	-0.0231001	0.0301972
G137	0.490568	-0.113828	0.154899	0.447711	0.491255	0.169185	0.410485	0.308104	0.251511	0.396245	0.510302	0.0638736	0.107921	0.436722	0.145833	-0.172207	-0.136813	0.447207	-0.404441	-0.0832875	0.39043	-0.543132	0.336126	0.383608	0.349405	0.404487	0.488049	0.316209	0.477885	0.441758	-0.114057	0.302152	0.281593	0.018315	0.453851	0.37706	0.279075	0.00389194	0.276969	0.248123	0.275229	0.404579	0.343498	0.255128	-0.309295	0.0254579	0.191117	0.486126	0.214835
G138	0.349542	-0.11978	0.263416	0.507921	0.502106	-0.0176282	0.429487	0.248031	0.283425	0.31369	0.375962	0.0205128	-0.107921	0.291712	0.00792125	-0.0871337	-0.146566	0.635852	-0.509936	-0.149908	0.553984	-0.267399	0.451511	0.391804	0.153571	0.384341	0.462546	0.485577	0.545513	0.173764	-0.0853022	-0.116529	0.0548535	-0.071978	0.592429	0.460989	0.282738	-0.0412088	-0.0686355	0.301053	0.308791	0.424954	0.452152	0.197207	-0.145421	-0.0149267	-0.119139	0.65554	0.11369
G139	0.294277	0.0286172	0.301374	0.346612	0.389515	0.0587912	0.45522	0.148855	0.147894	0.366896	0.21804	0.0280678	-0.0194597	0.325778	-0.0921245	0.14185	0.0513278	0.294597	-0.164881	-0.177518	0.264606	-0.15348	0.299679	0.382967	0.230952	0.305723	0.331822	0.253251	0.414057	0.0715659	-0.283196	-0.0468407	0.0625458	-0.078663	0.131389	0.428755	0.342399	-0.177701	-0.0820971	0.264515	0.0812271	0.407143	0.381181	0.305952	-0.0613553	-0.332051	0.0737179	0.231777	-0.0300824
G140	-0.25206	-0.125229	-0.189332	-0.314973	-0.378892	0.0382326	-0.35609	-0.296932	-0.174496	-0.256181	-0.271108	0.155632	0.143361	-0.0249542	0.143086	0.0798993	0.0226648	-0.343269	0.447985	0.589515	-0.395101	0.519551	-0.452885	-0.33924	0.00695971	-0.224267	-0.224588	-0.235119	-0.250549	-0.410119	0.0352106	0.0765568	0.0299451	-0.159066	-0.316144	-0.407463	-0.366758	0.23141	-0.143086	-0.168452	-0.139057	-0.0969322	-0.517857	-0.34391	-0.0369505	0.279579	-0.0603022	-0.30119	-0.0820055
G141	0.548672	0.251374	0.230815	0.628617	0.522894	0.0626374	0.501007	0.222207	0.170055	0.601236	0.421337	0.0629579	-0.0124084	0.415522	-0.173535	0.0674451	0.008837	0.672711	-0.548306	-0.297253	0.501648	-0.274222	0.373443	0.543132	0.027381	0.374267	0.50261	0.504029	0.539973	0.217491	-0.0587912	-0.0815934	0.172436	-0.215385	0.474776	0.503297	0.218361	-0.0648352	-0.0959707	0.133745	0.356456	0.373672	0.466117	0.396154	-0.122115	-0.20957	-0.0419414	0.607143	0.0361264
G142	0.123168	0.200504	0.242674	-0.0391026	0.139515	0.230174	0.224588	0.140201	0.198443	0.12848	0.0995421	0.0350733	0.0854853	0.0942308	-0.0705586	0.150183	0.277015	-0.000274725	0.0188645	-0.457921	0.0194139	-0.365797	0.260394	0.26076	0.0961081	0.0432692	0.148077	0.0120879	0.0918498	0.566804	-0.250916	0.0978022	0.0021978	-0.00828755	0.0635767	0.0915293	0.173901	-0.330769	0.562363	0.217628	-0.273764	-0.00503663	0.0832418	0.130815	-0.0367674	-0.323581	0.381364	0.0477106	0.336996
G143	-0.194643	0.091804	0.0671703	-0.402244	-0.430632	0.00622711	-0.227885	-0.114423	-0.189606	-0.341896	-0.333562	0.0445513	-0.0221154	-0.132097	0.111355	0.152656	0.0341117	-0.182647	0.394048	0.16978	-0.334707	0.451145	-0.183837	-0.187363	0.0719322	-0.213324	-0.198123	-0.173123	-0.301603	-0.169185	0.252701	0.143636	0.0968864	-0.0627289	-0.336565	-0.294322	-0.136355	0.0931777	-0.0462454	-0.0831502	-0.314789	-0.19739	-0.335302	-0.367079	0.261905	0.00581502	0.0475733	-0.275549	0.165614
G144	0.589744	0.187866	0.447619	0.53196	0.589469	-0.0339286	0.55609	0.45206	0.15783	0.517445	0.465568	-0.197802	0.17239	0.316071	0.102976	-0.0503663	0.0190476	0.502564	-0.513324	-0.387042	0.515751	-0.345192	0.431639	0.566438	0.24794	0.47619	0.666667	0.487271	0.573443	0.361264	-0.0860348	0.13196	-0.00828755	0.0392399	0.445358	0.737454	0.32848	-0.0162546	-0.0376374	0.423397	0.174679	0.414148	0.540201	0.41978	-0.119368	-0.00723443	-0.222802	0.572619	-0.140934
G145	0.409066	0.271703	0.274542	0.308013	0.352976	0.159295	0.465201	0.276511	0.370513	0.313965	0.179075	-0.225778	0.170009	0.327473	0.197115	0.0924451	0.301511	0.285577	-0.229853	-0.450137	0.346932	-0.275962	0.305586	0.36337	0.346886	0.429212	0.33956	0.212179	0.338462	0.582967	-0.194139	0.139469	-0.0229396	-0.0771062	0.314541	0.441667	0.452885	-0.184753	0.200366	0.355174	-0.0516484	0.213507	0.491484	0.360394	-0.126603	-0.132005	0.0664835	0.386996	0.0997711
G146	-0.438004	-0.126145	-0.367857	-0.215705	-0.35696	-0.194826	-0.44707	-0.369826	-0.123306	-0.33457	-0.464835	-0.14707	-0.251007	-0.321612	-0.126511	-0.0290293	-0.142628	-0.264194	0.320925	0.363233	-0.304258	0.638553	-0.307692	-0.393223	-0.207463	-0.196795	-0.413874	-0.0528388	-0.416117	-0.592079	0.0877289	-0.213324	-0.10348	-0.0427656	-0.141394	-0.339973	-0.343636	0.190659	-0.434982	-0.272482	-0.0412546	-0.155449	-0.266529	-0.362317	0.257601	0.20641	-0.236035	-0.197985	-0.217674
G147	0.54707	0.010119	0.437225	0.247161	0.591804	-0.0385073	0.681685	0.286401	0.393132	0.449176	0.532555	-0.188919	0.34739	0.338416	0.187179	0.151694	-0.0268315	0.355723	-0.376511	-0.234707	0.360943	-0.315568	0.420879	0.529121	0.135485	0.514423	0.617674	0.184341	0.596062	0.357097	-0.271016	0.0915751	-0.122665	0.0320513	0.283703	0.582418	0.535348	-0.044826	0.223397	0.541255	-0.15119	0.574359	0.435073	0.385073	-0.424725	-0.0640568	0.0184982	0.295147	0.0175824
G148	0.546474	-0.0478022	0.283333	0.371062	0.454716	-0.0200549	0.505723	0.429625	0.194826	0.299222	0.479945	-0.0940934	0.10206	0.238874	0.089011	-0.158929	-0.104808	0.485531	-0.43109	-0.12848	0.452564	-0.416941	0.43402	0.42587	0.356319	0.534615	0.561035	0.313233	0.588095	0.327289	-0.184661	0.241575	0.157463	-0.0273352	0.539841	0.617949	0.372802	0.160165	0.156868	0.475595	0.194872	0.511264	0.403205	0.399176	-0.180449	0.00169414	-0.071337	0.416804	0.0262363
G149	-0.280128	-0.0385989	-0.426648	-0.233791	-0.489652	-0.388324	-0.521154	-0.185485	-0.332463	-0.339011	-0.420238	0.0588828	-0.332875	-0.304945	-0.142537	-0.244048	-0.171566	-0.23924	0.36076	0.445971	-0.402473	0.441712	-0.334112	-0.337729	-0.0429029	-0.387363	-0.425641	-0.184432	-0.544185	-0.366804	0.257692	0.0178114	-0.0585623	-0.332647	-0.262434	-0.360714	-0.433516	0.122619	-0.143223	-0.174588	0.0153846	-0.283883	-0.470971	-0.414377	0.198993	0.117262	-0.341804	-0.334982	-0.147207
G150	0.495971	0.0344322	0.288828	0.367582	0.594734	0.0452381	0.660806	0.281868	0.398626	0.525641	0.613736	-0.027793	0.2462	0.385806	0.236905	0.161722	0.0886905	0.384936	-0.507326	-0.359661	0.574267	-0.425275	0.48402	0.532326	0.202244	0.497802	0.520559	0.182189	0.665339	0.355586	-0.170879	0.100046	0.107234	0.2788	0.291922	0.506502	0.529304	-0.11131	0.159341	0.51337	-0.0521978	0.54043	0.57967	0.507738	-0.365339	-0.17793	0.0614927	0.379716	0.0292582
G151	0.28402	-0.0906136	0.33109	0.107967	0.435348	-0.101145	0.504853	0.227656	0.237088	0.193727	0.512088	-0.0892399	0.107005	0.239148	0.160211	0.101145	-0.055815	0.276786	-0.322802	-0.2587	0.369002	-0.176099	0.379533	0.306319	0.1337	0.398306	0.411951	0.0213828	0.593727	0.126694	-0.216209	0.112912	0.0197344	0.320192	0.107327	0.446612	0.360256	-0.0692766	0.0701007	0.354853	-0.0480769	0.460485	0.43109	0.329075	-0.269414	-0.0319597	0.0251832	0.202198	0.114286
G152	-0.170009	-0.130632	-0.308608	-0.0820055	-0.184341	-0.163141	-0.27935	-0.124725	-0.0832418	-0.339973	-0.140568	-0.124405	0.0104396	-0.286905	0.0278846	-0.111126	-0.0449634	-0.211355	0.135073	0.41685	-0.169322	0.200046	-0.245375	-0.414606	-0.0228938	-0.013141	-0.323581	-0.195467	-0.13022	-0.461493	-0.0467033	-0.0854853	-0.16044	-0.0340201	-0.0165295	-0.104441	-0.148581	0.167125	-0.263416	-0.0804029	0.0627289	0.0273352	-0.131593	-0.0927198	-0.00430403	0.266758	-0.337729	-0.0836081	-0.417491
G153	0.493773	0.195009	0.133013	0.281548	0.418269	-0.00892857	0.421291	0.54217	0.371795	0.274634	0.348947	-0.132097	0.0695513	0.215293	0.0418956	0.0221612	0.092033	0.274725	-0.291667	-0.277885	0.427335	-0.0593864	0.31804	0.362225	0.167079	0.516896	0.296474	0.274771	0.332509	0.214515	0.0599359	0.144093	0.0693223	0.0774267	0.0686592	0.471932	0.393315	-0.104075	-0.00627289	0.333379	-0.0452381	0.326603	0.360623	0.227244	-0.0565018	0.00288462	0.019826	0.185897	0.0545788
G154	0.353434	-0.0297161	0.342582	0.50467	0.513553	-0.054533	0.386538	0.345559	0.188965	0.461676	0.227427	-0.122344	-0.235668	0.0709249	-0.292216	-0.0917582	-0.0393773	0.542079	-0.478297	-0.415476	0.496658	-0.324679	0.467628	0.505678	-0.0940018	0.393361	0.560943	0.558883	0.268132	0.173168	-0.107005	-0.0804487	0.0288462	-0.130998	0.392037	0.555769	0.319918	-0.106227	-0.140339	0.250504	0.289515	0.325046	0.402656	0.347619	0.0888278	-0.279625	-0.104304	0.445742	0.12152
G155	-0.0906593	0.027381	0.00361722	-0.209707	-0.146886	-0.0326923	-0.0414377	-0.257189	-0.219002	-0.15554	-0.16685	-0.267628	0.589835	0.0603938	0.573581	-0.318544	-0.123306	-0.192491	0.0671703	0.286493	-0.15957	0.128068	-0.176648	-0.306868	0.0397436	0.0021978	-0.137729	-0.0632784	-0.000915751	-0.0181777	0.0947802	-0.0303114	0.0084707	0.0391484	0.0278163	-0.245284	-0.142903	0.809982	-0.0903388	-0.081044	-0.143544	-0.213736	-0.143727	-0.0135531	-0.336447	0.740797	-0.084478	-0.151557	-0.277564
G156	0.487866	0.101282	0.340293	0.542857	0.719963	0.00874542	0.705769	0.291484	0.408288	0.612821	0.596612	-0.011859	0.0745421	0.334432	-0.0047619	0.195421	-0.0700092	0.521154	-0.583059	-0.276603	0.597161	-0.395238	0.45609	0.600504	0.0798077	0.484661	0.563599	0.382601	0.665751	0.184432	-0.260623	-0.039011	0.077381	0.0842491	0.424181	0.65119	0.539469	-0.212683	0.0622253	0.457372	0.107555	0.600824	0.635211	0.437866	-0.264286	-0.1913	-0.0114011	0.496245	0.0391941
G157	0.635394	0.0475733	0.493452	0.575366	0.6087	0.00100733	0.579441	0.491896	0.229167	0.496749	0.4212	-0.226969	0.0584249	0.3837	-0.0709249	-0.00975275	-0.0681319	0.614057	-0.492674	-0.402152	0.554029	-0.445147	0.492949	0.598718	0.20696	0.451465	0.661035	0.482967	0.48869	0.307875	-0.13956	0.00979853	-0.0891026	-0.0742216	0.486407	0.720513	0.4788	-0.0991758	-0.112271	0.438874	0.247802	0.40293	0.658883	0.429029	-0.0533883	-0.155082	-0.126877	0.503159	0.050641
G158	0.231136	-0.126832	0.179762	0.531273	0.34098	-0.000457875	0.350229	0.442995	0.238278	0.389973	0.254212	0.0749084	-0.0669872	0.134249	-0.0755037	-0.0395147	-0.199496	0.401877	-0.629853	-0.204853	0.407509	-0.392903	0.322024	0.354762	-0.0600733	0.291484	0.283745	0.423489	0.348718	0.166804	0.0380037	-0.137179	0.0670788	-0.00938645	0.46072	0.306044	0.296154	0.0647894	-0.0678571	0.105861	0.465385	0.283929	0.335211	0.460989	-0.132509	-0.0568681	-0.0607601	0.46685	-0.151282
G159	-0.228892	-0.0336538	-0.124908	-0.292995	-0.347802	-0.12326	-0.344826	-0.120742	-0.126145	-0.299588	-0.53196	-0.0818223	-0.166209	-0.110531	-0.110211	-0.0215201	0.052152	-0.334386	0.473352	0.0990842	-0.429441	0.615751	-0.383791	-0.209341	0.0558608	-0.326465	-0.274679	-0.189789	-0.378938	-0.374542	0.0898352	-0.135256	-0.150183	-0.121016	-0.31912	-0.194368	-0.350641	-0.00201465	-0.299908	-0.16163	-0.173443	-0.24217	-0.351282	-0.395101	0.359707	0.0265568	-0.0587912	-0.282234	-0.0995879
G160	0.0206502	-0.162088	0.169963	-0.174222	0.095696	-0.00874542	0.236126	-0.0597985	0.108379	-0.0211996	0.166941	0.0147436	0.329579	0.0271062	0.352656	0.335623	-0.0708333	-0.206456	0.0496795	0.130769	-0.0257326	0.237088	-0.103068	0.174176	-0.0692766	0.2	0.162821	-0.173535	0.243773	-0.249817	-0.381685	-0.0848901	-0.138462	0.28544	-0.145148	0.140018	0.111447	0.0318681	-0.146062	0.32326	-0.236538	0.372985	0.0142399	0.159707	-0.144872	0.215614	0.0114011	-0.0600275	0.0627289
G161	0.291163	-0.013141	0.116896	0.488278	0.333104	0.0322344	0.326099	0.358288	0.114881	0.351877	0.239515	0.213828	-0.0161172	0.194597	-0.0176282	0.0494505	-0.078022	0.528984	-0.475458	0.16685	0.46978	-0.289789	0.258425	0.367262	0.200458	0.221749	0.384203	0.303434	0.378342	-0.0711081	-0.116621	-0.056685	-0.0853022	-0.125046	0.472876	0.366392	0.260897	-0.115568	-0.0908883	0.229625	0.343315	0.440201	0.266804	0.297665	-0.0301282	0.0209249	-0.262637	0.499084	-0.0556777
G162	-0.242491	-0.182051	-0.0309524	-0.337866	-0.261447	-0.0803571	-0.287042	-0.266758	-0.10902	-0.434203	-0.440064	-0.0587912	-0.325962	-0.0129121	-0.302885	0.0447344	0.114606	-0.231868	0.435348	-0.0141484	-0.405815	0.449267	-0.275366	-0.189377	-0.0708791	-0.187729	-0.223718	-0.131868	-0.355586	-0.226465	0.022619	-0.0135073	0.0255037	0.041804	-0.312984	-0.290842	-0.325733	-0.0577381	-0.15261	-0.305174	-0.201557	-0.250412	-0.281364	-0.372344	0.395421	-0.195375	0.181181	-0.28196	0.103709
G163	0.520696	0.0533425	0.338507	0.630174	0.616804	0.142399	0.682692	0.2788	0.388553	0.622161	0.531822	0.0715201	0.0353022	0.390156	-0.0306777	0.108791	-0.000915751	0.656227	-0.675595	-0.266621	0.69185	-0.464973	0.494093	0.521108	0.17239	0.660485	0.568498	0.541987	0.727656	0.184615	-0.140156	-0.104029	0.181502	0.0157051	0.565002	0.630403	0.427381	-0.0619505	-0.0621795	0.325275	0.363645	0.665018	0.642674	0.610714	-0.205907	-0.148031	0.0209707	0.667262	0.0183608
G164	-0.0100733	-0.0866758	0.0602106	-0.127198	0.0194597	0.228571	0.189286	-0.199084	0.199542	0.0164835	0.0169872	0.00201465	0.506548	0.0277015	0.37706	0.463782	0.260714	-0.19185	0.0289377	0.116941	-0.011859	0.069826	-0.151419	-0.0495879	0.0570971	0.218223	-0.00998168	-0.105311	0.187271	-0.0152015	-0.279029	0.000549451	-0.121658	0.201145	-0.0494053	-0.0214286	0.183745	0.0177656	0.0371337	0.25174	-0.41076	0.196932	-0.0152473	0.185073	-0.278755	0.0850275	0.00265568	-0.0482143	-0.230632
G165	0.553022	0.0687729	0.265934	0.580907	0.563507	-0.0223443	0.53489	0.271154	0.264057	0.532921	0.447756	-0.160073	0.164789	0.377015	0.0315934	-0.0385989	-0.105907	0.533471	-0.471108	-0.296978	0.542353	-0.305998	0.236859	0.53283	0.098489	0.404853	0.599908	0.392537	0.505082	0.301832	-0.0610348	-0.0263736	0.0534799	-0.0596154	0.450784	0.633288	0.293223	-0.066163	-0.112042	0.335943	0.157326	0.374771	0.503022	0.359112	-0.0785256	-0.0419872	-0.151694	0.47294	0.0678571
G166	-0.348581	-0.100458	-0.440751	-0.00998168	-0.445238	-0.158379	-0.50119	-0.248443	-0.351007	-0.308929	-0.394368	0.0921245	-0.311767	-0.0888736	-0.200046	-0.0756868	-0.149771	-0.0251374	0.0787546	0.423855	-0.297161	0.19185	-0.266712	-0.352976	-0.158608	-0.357738	-0.235073	-0.0371337	-0.419643	-0.366758	0.347894	-0.0557692	0.0828297	-0.289973	-0.00734899	-0.372756	-0.44739	0.173764	-0.134386	-0.393864	0.308791	-0.276236	-0.346703	-0.266575	0.123993	0.0654304	-0.281593	-0.135668	-0.279304
G167	-0.0858059	-0.0565018	0.188278	-0.23109	0.0446886	0.153022	0.0899725	-0.234524	0.1587	-0.090293	-0.14826	-0.346978	0.235714	0.106731	0.268407	0.159203	0.0790751	-0.148672	0.156731	0.0796703	-0.15902	0.187729	-0.0762363	-0.0122711	0.194826	0.229853	0.126465	-0.0965201	0.074359	-0.0084707	-0.085989	0.00467033	-0.0453755	-0.0800366	-0.0462231	0.027381	0.117399	0.0633242	0.0450549	0.0543498	-0.35696	0.0635989	-0.0763736	-0.114194	-0.0372253	0.226374	0.111218	-0.00512821	0.106685
G168	-0.18228	0.0478938	-0.0948718	-0.251786	-0.14881	-0.0570971	-0.108013	-0.231319	-0.0918498	-0.162134	-0.0692766	-0.0975275	0.582738	-0.0437729	0.677381	-0.316667	-0.130769	-0.239515	0.152335	0.452152	-0.14826	0.18141	-0.319826	-0.403068	0.000457875	-0.0768315	-0.151419	-0.101969	-0.00705128	-0.109249	0.0270604	0.0782051	0.0282509	0.203159	-0.0331277	-0.273855	0.01163	0.750549	-0.0555403	-0.0941392	-0.159615	-0.192262	-0.157875	-0.0985806	-0.466758	0.734432	-0.0661172	-0.262363	-0.173443
G169	-0.144093	0.00558608	-0.0565476	-0.321795	-0.191575	-0.0542582	-0.102152	-0.165156	-0.115614	-0.193681	-0.116621	-0.160027	0.601832	-0.0195055	0.676603	-0.261264	-0.0627747	-0.3413	0.247894	0.480769	-0.189606	0.262729	-0.288599	-0.403755	0.042033	-0.0646978	-0.203846	-0.154212	-0.0554487	-0.103434	0.0322344	0.15435	0.105037	0.105495	-0.0554036	-0.255723	0.00416667	0.718864	-0.0444597	-0.041163	-0.304716	-0.115705	-0.158654	-0.0952839	-0.454029	0.703526	-0.0449176	-0.338507	-0.228342
G170	0.338965	-0.0419872	0.497436	0.0402473	0.336218	-0.00453297	0.338965	0.456456	0.0787546	0.147527	0.157234	-0.277015	-0.0100733	0.0355311	-0.00558608	-0.071978	-0.0363095	0.140522	-0.2962	-0.451328	0.194551	-0.213416	0.415568	0.437775	0.159112	0.369139	0.300321	0.184615	0.253617	0.194002	-0.102885	0.0117216	-0.00897436	0.0417582	0.182946	0.484341	0.346016	-0.0302198	-0.0732601	0.344277	0.0625458	0.298901	0.344277	0.212042	0.0721154	-0.0153846	0.00480769	0.143223	0.117491
G171	0.55119	0.0486264	0.265476	0.567033	0.529487	-0.00123626	0.506685	0.500275	0.111264	0.589744	0.434524	0.00998168	0.0029304	0.379899	-0.075641	-0.101557	-0.10522	0.526511	-0.389286	-0.176969	0.48109	-0.339332	0.364423	0.622115	0.120742	0.358288	0.685027	0.425321	0.447344	0.209478	0.033837	0.0701465	0.120513	-0.0332875	0.32205	0.638187	0.263645	-0.148489	-0.0461996	0.257463	0.237225	0.451328	0.42848	0.383791	-0.0702839	-0.113416	0.0360348	0.470238	0.159799
G172	0.547665	0.168819	0.336584	0.722161	0.589057	0.233929	0.605952	0.200687	0.276694	0.696749	0.506227	0.124496	0.0989011	0.554533	0.123443	0.0589744	-0.0165293	0.695879	-0.615293	-0.122802	0.607967	-0.481685	0.325641	0.514652	0.214332	0.520559	0.638095	0.536264	0.705678	0.284386	-0.0572344	0.0883242	0.26337	-0.00741758	0.62226	0.55293	0.360897	0.0615842	0.00778388	0.222573	0.440339	0.467445	0.527656	0.468819	-0.251053	0.0014652	-0.105586	0.572344	-0.0800824
G173	-0.40522	-0.128114	-0.343223	-0.346612	-0.258196	-0.0774267	-0.386584	-0.32587	0.00842491	-0.361172	-0.290476	0.0403846	-0.0145604	-0.447115	0.108562	-0.0203297	-0.107555	-0.531914	0.540888	0.410668	-0.447024	0.388736	-0.525137	-0.377198	-0.244093	-0.268727	-0.368636	-0.237088	-0.401694	-0.462271	-0.182326	-0.0695971	-0.142582	0.253571	-0.317266	-0.333059	-0.13663	-0.0278846	-0.015293	-0.18544	-0.328892	-0.208196	-0.473855	-0.368452	0.00178571	0.251374	0.116529	-0.468086	0.035348
G174	0.451282	0.0433608	0.274634	0.0595238	0.262866	-0.00521978	0.325183	0.258654	0.0266484	0.0821886	0.410485	-0.137363	0.140614	0.179029	0.187912	-0.0808608	-0.0198718	0.23022	-0.132051	-0.14533	0.260073	-0.198535	0.338965	0.233654	0.30641	0.386813	0.296154	0.335852	0.399176	0.249542	-0.127152	0.263553	0.267628	0.153617	0.296936	0.366621	0.209844	0.178022	0.162317	0.46685	-0.159112	0.266712	0.353663	0.149267	-0.155128	0.0779304	0.0641941	0.131914	0.108974
G175	0.574405	0.109432	0.421429	0.590156	0.70783	0.0907509	0.686859	0.406136	0.296932	0.484112	0.632005	-0.0919872	0.232051	0.474222	0.112042	0.00201465	-0.0196429	0.545925	-0.557555	-0.352976	0.578892	-0.41804	0.516163	0.537042	0.268178	0.514835	0.611676	0.463599	0.694872	0.259341	-0.275687	0.0532967	0.244689	0.132418	0.451699	0.704487	0.455037	-0.0128663	-0.0760531	0.425137	0.172253	0.521291	0.515659	0.445055	-0.320375	-0.0336538	0.0428571	0.619643	0.0436813
G176	0.493636	-0.0370879	0.295604	0.352656	0.333242	-0.0538919	0.394368	0.430678	0.167766	0.412088	0.31804	-0.198626	0.0846154	0.202839	0.00389194	-0.00668498	-0.133974	0.480815	-0.35467	-0.16859	0.436813	-0.137775	0.359341	0.436538	0.0577839	0.416071	0.444322	0.253022	0.348855	0.029304	-0.0029304	0.174954	0.0121337	-0.109982	0.279101	0.476786	0.223214	0.0126374	-0.139606	0.300962	0.235897	0.47793	0.433929	0.363965	-0.0251832	-0.0520147	-0.148672	0.270833	0.0326465
G177	0.426877	0.0582875	0.3625	0.257051	0.476786	-0.0459707	0.483333	0.381364	0.256548	0.26511	0.545833	-0.0614011	0.082967	0.228938	0.188141	-0.0788004	-0.0650641	0.247711	-0.241667	-0.173993	0.292308	-0.252015	0.436951	0.388645	0.0826465	0.486218	0.445192	0.290018	0.528022	0.205723	-0.365705	0.158562	0.250229	0.258379	0.246866	0.501694	0.302427	0.0317308	-0.00480769	0.402656	0.00247253	0.439377	0.383929	0.379258	-0.251282	0.0426282	0.154121	0.360256	0.173489
G178	-0.17674	-0.0552656	-0.00210623	-0.389332	-0.224176	0.113095	-0.116575	-0.203388	-0.000274725	-0.237134	-0.193132	0.159432	0.075641	-0.137775	-0.136767	0.635852	0.283104	-0.434295	0.419826	-0.000961538	-0.438095	0.469139	-0.314606	-0.102381	-0.228617	-0.106731	-0.177793	-0.228388	-0.265476	-0.246703	-0.168086	-0.0284799	-0.0953755	0.0838828	-0.533408	-0.194322	-0.0889652	-0.336538	-0.0429945	-0.027793	-0.408883	-0.0419872	-0.250687	-0.218452	0.137637	-0.270879	0.167674	-0.387821	0.131227
G179	0.252564	-0.0192766	0.195879	0.117491	0.413278	-0.113462	0.498077	0.0519689	0.238874	0.27239	0.449222	-0.0186355	0.283837	0.153617	0.217308	0.138233	-0.103068	0.205632	-0.331502	-0.046337	0.280678	-0.26772	0.30467	0.377335	0.031456	0.322253	0.470147	0.0854853	0.389423	0.157601	-0.327747	-0.169002	-0.0155678	0.00526557	0.177337	0.311722	0.361813	0.0217949	0.0989927	0.526374	-0.224679	0.407189	0.242537	0.28196	-0.402473	0.0936355	-0.0496795	0.200641	0.0913004
G180	0.215614	-0.0003663	0.257463	0.0092033	0.191026	0.146703	0.34391	-0.00563187	0.113599	0.138141	0.136218	-0.234799	0.718864	0.196841	0.7212	-0.0633242	0.0610348	0.0839286	-0.127106	0.134432	0.164286	-0.22381	0.0342491	0.0359432	0.207189	0.306868	0.169322	-0.0270147	0.333013	0.216438	-0.218773	0.0769231	-0.0677198	0.103755	0.184824	0.127106	0.346658	0.403114	0.0658425	0.24739	-0.168407	0.182097	0.132692	0.354396	-0.552885	0.501282	-0.0296245	0.118086	-0.13544
G181	0.481273	0.0108516	0.338965	0.454899	0.528755	-0.0912546	0.505723	0.488324	0.113645	0.350366	0.487775	-0.259478	0.108791	0.30087	-0.111722	0.081685	-0.112271	0.325733	-0.416484	-0.200549	0.3288	-0.312592	0.449542	0.459112	0.092674	0.384753	0.429899	0.370696	0.276832	0.132738	-0.228068	-0.0155678	0.161538	0.0989469	0.294806	0.658104	0.266987	-0.152015	-0.111447	0.300733	0.135485	0.425595	0.502152	0.458791	-0.115476	-0.114515	0.115888	0.306502	0.056685
G182	0.125412	0.0247711	-0.056456	0.121612	0.0117216	0.316026	0.107601	-0.0190934	-0.0446886	0.169826	0.180861	0.165614	0.233196	0.172482	-0.13576	0.554945	0.145238	0.0107601	-0.230082	-0.0782967	0.0595238	-0.125092	0.00842491	0.199451	-0.0262363	0.068544	0.159844	0.103526	0.0876374	0.0505952	0.0983059	0.0993132	0.181273	0.0782051	0.0581966	0.0917125	-0.1462	-0.11131	0.122619	-0.0138736	-0.11163	0.174542	0.032326	0.148489	-0.036859	-0.274222	0.104991	-0.022619	-0.118681
G183	0.290751	0.126603	0.127289	-0.0354396	0.0364469	-0.00100733	0.237866	0.249725	0.122848	0.0755952	0.136905	-0.065293	0.336172	0.125321	0.208883	0.0872711	0.238874	-0.0686355	0.0598443	-0.364057	0.0420788	0.0254579	0.145467	0.255815	0.297894	0.135989	0.173581	-0.0247711	0.133837	0.404625	-0.135623	0.223764	0.043315	0.0363095	-0.0312046	0.253297	0.0836996	-0.126007	0.31456	0.367903	-0.338233	0.089652	0.117537	0.147253	-0.138919	-0.110119	0.192125	-0.0337912	0.0225275
G184	0.380357	-0.060989	0.207372	0.499679	0.607051	0.0163462	0.591804	0.0818223	0.3962	0.401557	0.403846	-0.0818223	0.148168	0.422619	0.0456044	0.138141	-0.0352106	0.41543	-0.370925	-0.218452	0.450549	-0.280907	0.284112	0.35206	0.171841	0.391163	0.377473	0.367857	0.485211	0.294597	-0.287637	0.00989011	0.114469	0.286035	0.390137	0.39391	0.411859	-0.0413004	-0.0281593	0.296658	0.0602106	0.345559	0.523168	0.303526	-0.280998	-0.113233	0.189286	0.468407	0.0420788
G185	0.359753	0.0734432	0.233333	0.501282	0.364377	0.343681	0.497711	0.166438	0.250366	0.557967	0.446566	0.241621	0.216667	0.395513	0.0125916	0.341941	0.144368	0.451328	-0.518681	-0.278892	0.542995	-0.587179	0.284844	0.433242	0.0369505	0.320467	0.496245	0.285897	0.460623	0.392262	-0.1212	0.0254579	0.190842	0.138919	0.337366	0.326832	0.295238	-0.260165	0.157555	0.267079	0.192674	0.2962	0.392995	0.425549	-0.113187	-0.286996	0.0703297	0.446703	0.133379
G186	0.398993	-0.0238553	0.203159	0.249863	0.211584	0.141438	0.396154	0.171795	0.00924908	0.344872	0.305082	-0.1087	0.131548	0.133654	-0.179945	0.301465	0.180998	0.283791	-0.252701	-0.384615	0.246932	-0.192903	0.244368	0.371841	0.0429945	0.356364	0.441484	0.138874	0.187683	0.268819	-0.124588	0.0161172	0.0318223	-0.0718864	0.144416	0.382326	0.129899	-0.2913	0.0697344	0.348581	-0.0565934	0.379121	0.364744	0.288645	0.0772436	-0.292353	-0.0305403	0.265705	0.0382784
G187	0.00343407	-0.00581502	-0.190751	0.0414835	-0.161035	-0.0800824	-0.00343407	-0.157143	-0.173855	-0.00599817	-0.047848	0.0570513	0.370238	-0.0212454	0.387134	0.185714	0.0389652	0.0315018	-0.148993	0.438828	0.0307692	0.181136	-0.24707	-0.0571429	0.0294872	0.1125	0.0801282	-0.0468407	0.0938645	-0.286722	0.149908	0.100046	-0.0574634	-0.0807234	0.104145	-0.010348	-0.120101	0.276236	-0.0387821	0.128571	-0.0587912	0.143315	-0.140247	0.023489	-0.155678	0.436264	-0.417811	0.0335165	-0.352152
G188	0.496886	-0.124496	0.371016	0.519963	0.483883	0.107692	0.646612	0.478342	0.224634	0.503892	0.480082	-0.172802	0.145513	0.186996	-0.113553	0.13196	-0.0458333	0.521429	-0.639103	-0.438599	0.643636	-0.469048	0.558425	0.596474	0.093544	0.547756	0.605815	0.43141	0.496703	0.316071	-0.1212	-0.0101648	0.0985348	0.00421245	0.527204	0.718407	0.295742	-0.110348	0.0357143	0.440659	0.138874	0.568452	0.50119	0.493544	-0.0458333	-0.188278	0.0195971	0.525641	0.0598901
G189	-0.172802	-0.0442308	-0.228984	-0.145925	-0.367628	-0.16163	-0.422848	-0.136218	-0.231639	-0.283974	-0.502701	-0.100046	-0.189286	-0.260256	-0.112363	-0.0200092	-0.0107143	-0.192949	0.420375	0.323535	-0.33837	0.583654	-0.320238	-0.42239	-0.162546	-0.232692	-0.307647	0.00155678	-0.449542	-0.349359	0.230952	-0.0788462	-0.26859	-0.155769	-0.186357	-0.255311	-0.409707	0.156822	-0.478663	-0.220559	0.0279304	-0.318178	-0.248901	-0.417491	0.399908	0.220696	-0.347894	-0.226832	-0.245055
G190	0.368452	-0.168315	0.266804	-0.00581502	0.429029	-0.096978	0.457463	0.237454	0.318407	0.332326	0.366392	0.00160256	0.251053	0.150916	0.0839286	0.333974	-0.00792125	-0.00485348	-0.200412	-0.19043	0.113965	-0.221749	0.14446	0.461951	-0.0929487	0.315842	0.451557	0.0554029	0.289881	0.164194	-0.429899	-0.0135531	-0.0737637	0.204579	-0.141233	0.35522	0.271612	-0.223764	0.0989011	0.331548	-0.243086	0.374679	0.20554	0.270375	-0.303022	-0.178709	0.224313	-0.0242216	0.200458
G191	0.36369	0.034707	0.077152	0.063141	0.270513	-0.0165751	0.375092	0.184615	0.332692	0.276648	0.362958	-0.179579	0.204533	-0.119505	0.111859	0.0472527	0.12935	0.108059	-0.170696	-0.366804	0.391712	-0.0684066	0.186401	0.197802	0.0739469	0.462866	0.278342	0.0239011	0.325595	0.275412	-0.260256	0.11511	-0.0817766	0.153205	0.132534	0.435623	0.39707	-0.107097	0.0727564	0.482097	-0.203617	0.335165	0.446291	0.292491	-0.0871795	-0.094826	-0.085348	0.108059	0.162454
G192	-0.0500916	-0.0244963	-0.0128205	-0.284799	-0.0426282	-0.14446	0.05	-0.306777	-0.0288462	-0.0793498	-0.191575	-0.209158	0.469368	0.0305403	0.416987	0.0860348	0.270284	-0.244231	0.257143	0.146383	-0.167674	0.383471	-0.183837	-0.245971	-0.0468864	0.0280678	-0.0989927	-0.315842	-0.0506868	-0.0638278	-0.107005	-0.0154304	-0.108516	-0.0221612	-0.174201	-0.11511	0.0646062	0.341438	-0.19446	0.123581	-0.370833	-0.035989	0.0537088	-0.0032967	-0.319185	0.285302	-0.124267	-0.30783	-0.231136
G193	0.404991	0.125412	0.197207	0.584478	0.48196	0.150412	0.55815	0.238919	0.315888	0.535394	0.436951	0.0324176	0.0914377	0.316026	-0.0460623	-0.0424451	-0.0173535	0.518407	-0.457967	-0.272344	0.588874	-0.404762	0.444322	0.415476	0.307875	0.419734	0.377015	0.382189	0.52152	0.52152	-0.213049	0.0480769	0.0607601	-0.151099	0.476722	0.51511	0.432509	-0.12033	0.223993	0.408745	0.266575	0.329762	0.496337	0.37848	-0.139973	-0.135119	0.0279304	0.555037	0.11044
G194	-0.193498	-0.110806	-0.293544	-0.104304	-0.340522	-0.365064	-0.359386	-0.183333	-0.276969	-0.340522	-0.318819	-0.0570971	-0.208242	-0.200778	0.0299908	-0.228984	-0.120101	-0.0847985	0.144689	0.482555	-0.245833	0.404304	-0.237042	-0.433516	-0.0233059	-0.0240842	-0.275046	-0.112958	-0.261722	-0.418773	0.222482	-0.0667582	0.0501374	-0.237912	-0.054442	-0.242079	-0.336172	0.46717	-0.338187	-0.127839	0.152518	-0.165201	-0.238187	-0.208196	0.0570055	0.317399	-0.413233	-0.154716	-0.322161
G195	0.417949	0.0909799	0.340568	0.619963	0.464744	0.0606685	0.464011	0.278388	0.237042	0.500321	0.286081	0.0434524	-0.00283883	0.332784	-0.106136	0.112821	0.134066	0.548672	-0.476648	-0.262821	0.461126	-0.442857	0.208654	0.416026	0.108516	0.375733	0.512408	0.437912	0.465201	0.323581	-0.108516	0.0234432	-0.0413919	-0.240339	0.391465	0.472344	0.241804	-0.195559	0.00233516	0.257326	0.318773	0.276465	0.366804	0.324954	0.0206502	-0.202152	-0.234066	0.603159	0.0964286
G196	0.257143	0.269002	0.101694	0.522299	0.329808	0.129167	0.208104	-0.00238095	0.251236	0.464377	0.325321	-0.0633242	0.15	0.130357	0.0862179	-0.169734	-0.0570055	0.368681	-0.37935	-0.032967	0.371062	-0.225	0.107692	0.179533	-0.0586538	0.272482	0.223901	0.323397	0.281548	-0.0381868	-0.0184982	-0.0765568	0.147711	-0.0890568	0.400142	0.243269	0.195696	0.165339	-0.229487	-0.0483059	0.403846	0.130907	0.333242	0.32793	-0.246062	0.105266	-0.142308	0.410623	-0.290156
G197	0.441987	-0.0182692	0.117399	0.633883	0.461859	0.0281593	0.408929	0.283379	0.273901	0.352747	0.538507	-0.0772894	0.0619505	0.158379	-0.0477564	-0.124359	-0.132921	0.475092	-0.550595	-0.145467	0.505403	-0.377473	0.294551	0.210348	0.180586	0.370055	0.341667	0.374679	0.489377	0.265339	-0.121291	0.0237179	0.120513	0.0475733	0.584256	0.565797	0.179029	0.0173077	-0.0120879	0.11685	0.431593	0.296978	0.397253	0.288507	-0.105311	-0.0100275	-0.0279762	0.565842	0.0343407
G198	-0.201007	0.141529	-0.155769	-0.0998626	-0.127289	-0.239286	-0.123214	-0.0378205	0.080174	-0.0178571	-0.192582	-0.0944139	-0.066804	-0.287225	-0.0807692	-0.106502	0.140201	-0.191392	0.0904762	-0.0813187	0.0648352	0.365751	-0.14913	-0.0771978	-0.0911172	-0.119551	-0.187775	-0.153892	-0.285668	0.107326	0.132738	0.112637	-0.199679	-0.115247	-0.188074	-0.153297	-0.0785256	-0.151419	0.07413	-0.0951007	-0.169551	-0.233974	-0.0613553	-0.204533	0.116804	0.0547161	-0.135806	-0.167491	0.0268315
G199	-0.411447	-0.299496	-0.339789	-0.441712	-0.427793	-0.237821	-0.411722	-0.237317	-0.129396	-0.431044	-0.3462	-0.147207	0.245055	-0.234249	0.248123	-0.151465	-0.257463	-0.343132	0.266941	0.465797	-0.420696	0.369918	-0.336859	-0.574588	-0.109386	-0.15989	-0.319643	-0.219414	-0.380403	-0.388828	0.117399	-0.0741758	-0.0478938	0.137729	-0.196591	-0.442628	-0.120879	0.463553	-0.159936	-0.0412546	-0.321337	-0.110165	-0.251694	-0.335027	-0.185394	0.436767	-0.142995	-0.321886	-0.168544
G200	0.511676	0.194231	0.346108	0.611218	0.503984	0.0585623	0.526877	0.39011	0.0760531	0.566896	0.407143	-0.00132784	-0.0268315	0.360714	-0.00151099	-0.0479853	-0.112363	0.655495	-0.626465	-0.0654304	0.600962	-0.433929	0.35902	0.51946	0.198443	0.374588	0.489148	0.362592	0.607692	0.115614	0.0532051	0.0727106	0.0869505	-0.00613553	0.564979	0.546841	0.291804	-0.0014652	-0.1163	0.173031	0.403159	0.505311	0.470604	0.463736	-0.210485	0.0200549	-0.242033	0.611813	-0.205266
G201	0.393892	0.0188189	0.180771	0.603578	0.424043	-0.0121567	0.350118	0.320288	0.154695	0.440252	0.209801	-0.00373173	-0.0605089	0.385101	-0.0915075	-0.0926522	-0.120125	0.595016	-0.377477	-0.160739	0.377935	-0.376538	0.326423	0.350004	0.334344	0.286153	0.429149	0.54529	0.435765	0.132007	0.0489703	-0.0162777	0.186197	-0.145377	0.614368	0.509988	0.195195	0.0657288	-0.146705	0.260626	0.459758	0.284733	0.536545	0.251537	0.0501379	-0.0508705	-0.034135	0.517794	-0.0105084
G202	0.200229	-0.0235348	-0.0380952	0.646795	0.198168	0.281456	0.0938187	0.093315	0.00215201	0.36946	0.192262	0.241804	-0.287729	0.254945	-0.41978	-0.122619	-0.0912088	0.602335	-0.368773	-0.148581	0.404258	-0.368819	0.288645	0.255586	0.106227	0.150549	0.283196	0.546474	0.227152	0.0962912	0.197253	0.011859	0.279579	-0.286538	0.533706	0.269597	-0.0188187	-0.0671245	-0.008837	-0.102381	0.711035	0.140751	0.304441	0.126099	0.282601	-0.271154	0.0558608	0.523214	0.126694
G203	-0.179441	0.0539377	-0.112088	-0.213828	-0.226465	-0.053022	-0.0869048	-0.257967	-0.152152	-0.139652	-0.135531	-0.0828297	0.561126	-4.57875e-05	0.624863	-0.358929	-0.113736	-0.197482	0.0759158	0.442857	-0.113141	0.181639	-0.266575	-0.368681	0.0461538	-0.0320971	-0.165064	-0.113095	0.00709707	-0.0467033	0.146429	0.0820513	0.136447	0.0342033	0.0500464	-0.307601	-0.0577839	0.893132	-0.0193681	-0.0951923	-0.114789	-0.191804	-0.177289	-0.0365385	-0.413004	0.723764	-0.0827381	-0.235027	-0.267308
G204	0.372165	0.176948	0.0540757	0.229856	0.130656	0.143523	0.220653	0.270791	0.138166	0.198697	0.185327	-0.114356	0.0421479	0.16937	-0.065683	-0.0241532	0.0387138	0.25726	-0.207718	-0.381483	0.308955	-0.390206	0.360947	0.264335	0.350508	0.144576	0.267585	0.293708	0.141439	0.582676	0.0706739	0.196843	0.131183	-0.190455	0.349046	0.271706	0.00347989	-0.0452615	0.290571	0.235831	0.0770613	0.0384849	0.196728	0.0923316	0.1098	-0.0979636	0.159823	0.218981	0.288396
G205	-0.0248626	0.0689103	-0.160119	-0.0226648	-0.0896978	-0.0153388	0.00421245	0.000778388	-0.14011	0.00961538	0.0200549	0.136493	0.557738	0.150824	0.72239	-0.242811	0.0570055	-0.0265568	-0.0271062	0.393773	0.041163	-0.128434	-0.147299	-0.1962	0.131777	-0.046337	0.0288462	-0.104945	0.0945513	0.103526	0.0918956	0.340339	0.190339	0.211172	0.0994517	-0.183104	0.132555	0.527427	0.25609	0.0710165	-0.0576465	-0.0468407	-0.0447802	0.0827839	-0.600595	0.533333	-0.0794872	-0.0572344	-0.189057
G206	0.24533	0.233471	0.287775	0.0399725	0.0629121	0.239286	0.20641	0.226877	0.0328755	0.0679945	0.144872	-0.110302	-0.101877	0.379075	-0.252198	0.123901	0.2375	0.157509	-0.0839286	-0.459615	0.0751374	-0.262958	0.394093	0.261905	0.318681	0.0914835	0.173901	0.0934524	0.114286	0.512179	0.0718407	0.395696	0.36163	0.0336081	0.0614705	0.146383	-0.0293956	-0.257143	0.373764	0.0366758	-0.0101648	0.0282051	0.15609	0.139973	0.152656	-0.323489	0.420788	0.160943	0.347802
G207	0.535073	0.0181319	0.352701	0.66891	0.707326	0.129991	0.691667	0.422711	0.414103	0.548214	0.656914	0.00325092	0.126465	0.311676	0.00535714	-0.0108516	-0.0864927	0.632005	-0.599176	-0.33457	0.661813	-0.535668	0.543315	0.542445	0.215842	0.47848	0.615797	0.445147	0.670879	0.409203	-0.308608	-0.0135073	0.0537546	0.0367216	0.563399	0.728663	0.538324	-0.191117	0.100458	0.45815	0.229396	0.534844	0.549908	0.460806	-0.296612	-0.145971	0.0531593	0.652106	0.137088
G208	0.453342	0.0260989	0.464973	0.053663	0.459478	-0.0182692	0.539423	0.198352	0.358516	0.353205	0.40119	-0.260485	0.36511	0.191896	0.225504	0.178068	-0.000549451	0.156548	-0.196795	-0.294093	0.205403	-0.0754579	0.291941	0.436538	0.0269689	0.470971	0.425183	0.101328	0.451007	0.197711	-0.391712	-0.0400641	-0.163736	0.0559524	0.0484209	0.449038	0.396474	-0.0666209	-0.0909799	0.476557	-0.199451	0.439423	0.358562	0.296566	-0.266987	0.064652	-0.0144231	0.290568	0.120696
G209	0.533104	0.0343407	0.259661	0.392811	0.458654	-0.188324	0.454167	0.343636	0.212042	0.269277	0.343315	-0.203022	-0.077793	0.273626	-0.0262363	-0.0614011	-0.0184524	0.408929	-0.342949	-0.241392	0.427885	-0.155586	0.44794	0.56946	0.275916	0.439057	0.5587	0.375733	0.283333	0.134844	-0.0597985	0.107692	0.135897	-0.0826007	0.385902	0.641712	0.290934	-0.0849817	-0.166941	0.420375	0.130128	0.449588	0.485256	0.177152	0.1125	-0.0385073	-0.132143	0.340568	0.050641
G210	-0.103022	0.0370879	-0.0635531	-0.168361	-0.115888	-0.122253	0.113278	0.0136447	-0.0340659	-0.0294872	-0.0359432	-0.0424451	0.580952	-0.0190018	0.863965	-0.123031	-0.0627289	-0.137225	-0.0629579	0.407921	0.0215201	-0.0112179	-0.148214	-0.155174	0.104487	0.0576465	-0.054304	-0.198855	0.141575	-0.0099359	0.0498626	0.0886905	0.0144231	0.124588	0.0845935	-0.144551	0.228846	0.58402	0.143864	0.169551	-0.123672	0.0127289	-0.0443223	0.152152	-0.578755	0.702106	-0.151603	-0.152335	-0.271932
G211	-0.135302	0.14478	-0.0923535	-0.0400641	-0.135485	0.123535	-0.219689	-0.134295	-0.271337	-0.215705	-0.0413919	0.0641484	-0.178297	0.25119	-0.0898352	-0.147756	0.190568	-0.0439103	0.13402	0.144139	-0.0585165	0.136538	-0.00572344	-0.27294	0.0907967	-0.0714744	-0.121978	0.115842	-0.0608516	-0.0084707	0.369414	0.270147	0.632005	0.139148	-0.021818	-0.220696	-0.34826	0.344231	-0.102701	-0.294414	0.180861	-0.203205	-0.0782051	-0.132326	0.0543498	0.169277	0.194734	-0.0250916	-0.00201465
G212	0.15348	-0.154121	0.228297	0.0129579	0.114789	0.0788919	0.220925	-0.142903	0.0781136	0.027793	-0.00572344	-0.269093	0.594689	0.33109	0.595788	-0.0647436	-0.0747711	0.0783883	-0.0413462	0.243681	0.019185	0.00389194	-0.020696	-0.0224359	0.30435	0.223535	0.100824	-0.01163	0.238187	0.0923077	-0.0929945	0.0951465	0.0789377	-0.101511	0.230589	0.0692766	0.167995	0.479396	-0.104441	0.180311	-0.105266	0.115385	0.0662088	0.114927	-0.401603	0.484936	-0.0548077	0.0903846	-0.209478
G213	0.403159	0.0950549	0.157372	0.519597	0.470101	0.14881	0.462042	0.33054	0.15	0.583974	0.373947	0.0499084	0.148214	0.396566	0.120604	0.154762	0.0544414	0.549908	-0.4375	-0.160806	0.549405	-0.292125	0.323123	0.435211	0.316026	0.362317	0.493819	0.289057	0.520421	0.205907	-0.169963	0.202427	0.0537088	-0.0913919	0.353759	0.538599	0.438782	-0.159799	0.0524725	0.399496	0.26717	0.47152	0.54098	0.357372	-0.219505	-0.13663	-0.199038	0.504762	0.0569139
G214	-0.0790293	-0.00787546	0.00526557	-0.241163	-0.137958	-0.0462912	-0.0528846	-0.159341	-0.195833	-0.139148	-0.095696	-0.340751	0.537179	-0.00169414	0.484982	-0.326786	-0.0643315	-0.121886	-0.0043956	0.239698	-0.0731227	0.115247	-0.0864011	-0.261401	0.121795	0.0694139	-0.0509615	-0.0996337	0.0105769	-0.0237179	0.0816392	0.0973901	0.114011	0.0808608	0.118614	-0.10348	-0.0480311	0.765751	-0.0358059	0.131273	-0.173901	-0.000137363	-0.0574176	-0.0593864	-0.385577	0.622207	-0.185211	-0.0739927	-0.270925
G215	0.484661	-0.0339744	0.345879	0.427656	0.546612	-0.0473901	0.507189	0.370238	0.483288	0.358974	0.54707	-0.104167	-0.0539835	0.248855	-0.0479853	0.0139194	-0.0797161	0.588919	-0.539286	-0.363233	0.517582	-0.35989	0.503617	0.468498	0.113049	0.526053	0.619643	0.406639	0.564927	0.294505	-0.110348	0.030815	0.052793	0.103022	0.472739	0.512408	0.45522	-0.0906593	-0.039881	0.439194	0.126603	0.592582	0.586951	0.328663	-0.0952839	-0.206685	-0.119872	0.569139	0.126236
G216	0.344322	-0.0565018	0.258562	0.474542	0.373443	0.0649725	0.527793	0.277015	0.106868	0.377015	0.473581	-0.112454	0.106273	0.239286	0.0624542	-0.127198	0.0377289	0.488278	-0.498855	-0.189789	0.538187	-0.307372	0.483196	0.332738	0.141896	0.501236	0.391346	0.311859	0.45641	0.266804	-0.0746795	0.123901	0.303709	-0.0139194	0.440023	0.494505	0.186951	0.058196	0.0461081	0.276511	0.248993	0.495513	0.398672	0.373718	-0.232875	-0.0109432	-0.0239469	0.576419	0.0345696
G217	-0.0809982	0.0401557	-0.300321	-0.185714	-0.253159	-0.393269	-0.341941	0.0173077	-0.162958	-0.215201	-0.177289	-0.043544	-0.156593	-0.225916	-0.03663	-0.197482	-0.01337	-0.140705	0.163965	0.0868132	-0.149267	0.297573	-0.136447	-0.213919	-0.115842	-0.304853	-0.107189	-0.0904304	-0.220879	-0.185119	0.239973	-0.00393773	-0.248855	0.0113553	-0.150093	-0.186767	-0.442995	0.0291209	-0.0754121	-0.166896	-0.0782967	-0.212912	-0.220147	-0.314148	0.173123	0.097619	-0.200733	-0.19881	-0.121337
G218	-0.0408425	0.134936	-0.0665293	-0.0447344	-0.248306	0.29881	-0.0735348	-0.0735806	-0.168407	0.134203	-0.0967949	0.281181	0.161172	-0.0576007	-0.0727564	0.234341	0.233242	-0.0421703	0.0918956	-0.0793956	-0.0981227	-0.164103	-0.166026	0.091804	-0.17381	-0.130082	-0.0299451	-0.104533	-0.203342	0.136538	-0.057967	0.205311	-0.00970696	-0.0527015	-0.194988	-0.219597	-0.0370879	-0.325916	0.28141	-0.129487	-0.0143315	-0.195925	-0.143178	0.0217949	0.220833	-0.208013	0.150092	-0.0276099	0.232143
G219	-0.010989	0.119918	-0.134158	-0.228342	-0.232372	0.0298535	-0.108333	-0.0120879	-0.0408883	-0.153984	-0.131548	-0.000915751	0.144963	0.021978	0.169551	0.0149725	0.111081	-0.141163	0.111813	-0.0847527	-0.0282967	0.0663004	-0.111905	-0.0761447	0.301374	-0.236584	-0.203938	-0.264789	-0.0608516	0.156044	0.178388	0.184386	-0.106868	-0.0403388	-0.0545565	-0.198626	-0.177701	-0.0516026	0.272115	0.0298077	-0.223397	-0.129304	-0.149679	-0.175504	0.14359	-0.00347985	-0.0327381	-0.173626	-0.0546245
G220	-0.226603	-0.181777	0.0560897	-0.486081	-0.113141	0.0418498	-0.0311813	-0.260394	0.127244	-0.311218	-0.238049	-0.0929945	0.243681	-0.0520147	0.21337	0.352152	0.105678	-0.476145	0.475549	0.183562	-0.402747	0.38109	-0.273581	-0.0982143	-0.0143773	-0.145101	-0.165293	-0.349267	-0.199313	-0.0751374	-0.288965	-0.119872	-0.206822	0.134661	-0.429103	-0.280769	-0.0808608	-0.0919414	0.0943681	0.0905678	-0.611126	-0.0895604	-0.395238	-0.245513	-0.133379	0.0684524	0.296016	-0.376694	0.132463
G221	-0.15989	-0.0782509	-0.072848	-0.228068	-0.141163	0.0288004	-0.116758	-0.206731	-0.137821	-0.192262	-0.0615385	-0.166346	0.517125	0.128663	0.567995	-0.297756	-0.0913004	-0.0875458	0.0198718	0.310943	-0.0875458	-0.10174	-0.135989	-0.374405	0.0861722	-0.0606685	-0.119734	-0.145192	0.0434982	0.0344322	0.00311355	0.138507	0.147344	0.235989	0.110235	-0.297115	0.0557692	0.676786	0.0680861	-0.0555403	-0.128663	-0.0869963	-0.00489927	0.102289	-0.592125	0.487775	-0.0143773	-0.147802	-0.23402
G222	0.0407967	-0.0709249	0.182601	0.0693681	0.0676282	0.130403	0.236126	-0.225229	0.105586	0.0290293	0.0373626	-0.164698	0.148031	0.0413004	0.153342	0.28402	0.158562	0.141484	-0.14826	-0.000961538	0.232555	0.104762	0.0972527	0.047207	0.0835623	0.33109	0.0575092	0.00906593	0.253342	-0.112317	-0.219414	-0.139881	-0.0899725	-0.0239927	0.200849	0.180357	0.209799	0.00906593	-0.20522	0.27587	-0.0242674	0.342353	0.179899	0.37381	-0.138782	0.0455586	-0.228434	0.209753	-0.209753
G223	0.156227	0.14185	0.128571	0.00764652	0.0873168	0.0936355	0.117079	0.0473901	0.222115	0.163507	0.0678571	-0.0202839	0.147665	0.119002	-0.0477564	0.00805861	0.280815	0.0211538	-0.0191392	-0.49217	0.0635073	-0.302335	0.131502	0.187179	0.168819	0.0478938	0.0641484	-0.0482601	0.0646978	0.46891	-0.215293	0.113416	-0.194597	-0.0879121	-0.10474	0.102152	0.204853	-0.315156	0.403938	0.190614	-0.116575	-0.0547619	0.177152	0.122619	-0.0330128	-0.335531	0.112912	-0.00554029	0.0827839
G224	0.0540293	-0.174313	0.225046	-0.201694	0.155907	-0.0574176	0.0995879	0.143269	0.11685	0.0214744	0.18924	-0.228571	-0.000320513	-0.0620421	0.0662088	-0.201328	-0.151603	-0.0629579	0.00750916	-0.0214286	0.00769231	-0.0667125	0.257143	0.091163	0.0703755	0.198855	0.0567766	-0.227427	0.193727	0.038141	-0.289927	0.022207	-0.164332	0.187363	0.0486498	0.0515568	0.200824	0.0450549	0.150412	0.3413	-0.226374	0.429625	0.109203	0.229441	-0.244872	0.0395147	-0.0136905	-0.0192766	-0.0357601
G225	-0.376969	-0.115339	-0.149451	-0.407051	-0.392903	-0.260027	-0.385302	-0.128342	-0.185302	-0.458929	-0.554625	-0.00480769	-0.221474	-0.263462	-0.0947802	0.0239927	-0.0505495	-0.447482	0.54098	0.277976	-0.539377	0.782463	-0.361722	-0.241392	-0.116071	-0.389515	-0.364011	-0.278205	-0.565659	-0.419689	0.0116758	-0.16859	-0.138004	-0.140522	-0.444511	-0.28924	-0.313416	-0.0160714	-0.297527	-0.193407	-0.231181	-0.24881	-0.521062	-0.47706	0.24217	0.10989	0.0167125	-0.402701	0.0480769
G226	0.608471	-0.0505037	0.559249	0.26946	0.56543	0.0833791	0.646566	0.584707	0.283425	0.501465	0.509936	-0.184478	0.292995	0.283516	0.113278	0.0782509	-0.0350275	0.34446	-0.448993	-0.341484	0.466163	-0.405449	0.515751	0.61772	0.222024	0.554808	0.594048	0.30174	0.540797	0.266026	-0.223352	0.0451007	-0.0668956	0.0287088	0.236106	0.643315	0.567445	-0.0930861	0.0142857	0.59478	-0.0569139	0.633608	0.517537	0.479579	-0.194643	-0.0889652	-0.0193223	0.331822	0.0690934
G227	0.0959707	-0.0864927	0.39478	0.289194	0.362729	0.264881	0.492949	0.327473	0.274679	0.298855	0.360211	0.0526557	0.132234	0.223993	-0.0251374	0.203526	0.127427	0.311767	-0.398855	-0.286767	0.438416	-0.476374	0.475137	0.394139	0.163049	0.338324	0.394734	0.157647	0.377427	0.443407	-0.264881	-0.101007	-0.0331502	-0.0159341	0.279719	0.371566	0.341438	-0.310165	0.296612	0.395971	0.081456	0.346337	0.325504	0.425916	-0.172665	-0.199588	0.232555	0.468132	0.36369
G228	-0.00311355	-0.116438	0.0908883	-0.132234	0.0500916	-0.067674	0.095696	-0.0535256	-0.00393773	-0.040522	0.127701	-0.113965	0.310577	-0.00700549	0.184753	-0.043315	-0.152106	-0.0608516	-0.132921	0.13489	0.0128205	-0.0172161	0.00833333	-0.0821429	0.00782967	0.0958791	0.0260989	-0.0209707	0.0923077	-0.0737637	-0.0573718	-0.0560897	-0.141026	0.100504	0.0616765	-0.0349817	0.0658425	0.352518	0.0607143	0.112637	-0.107647	0.147985	0.0840201	0.0224817	-0.19881	0.326648	0.0255495	-0.17587	-0.0364011
G229	-0.185211	0.074359	-0.206593	-0.0272436	-0.125641	-0.240888	-0.197207	-0.138416	0.0267857	-0.144139	-0.1663	-0.134066	0.259295	-0.0737179	0.461676	-0.25087	-0.0863553	-0.0818681	9.15751e-05	0.505998	-0.125046	0.2038	-0.261905	-0.373764	0.022207	0	-0.156319	-0.0619963	-0.0348443	-0.314332	0.175962	-0.0643773	-0.0306319	-0.137729	0.0437505	-0.197115	-0.0261905	0.56717	-0.18022	-0.0261447	-0.0330128	-0.119505	-0.166071	-0.140568	-0.287775	0.537134	-0.447024	-0.00210623	-0.448626
G230	0.297573	0.12587	0.115842	0.566484	0.383471	0.148535	0.413049	0.134615	0.25902	0.447299	0.416712	0.171978	0.0702381	0.288141	0.0464744	-0.0174451	0.104029	0.476648	-0.457234	-0.163095	0.505449	-0.476603	0.409249	0.319277	0.246337	0.473306	0.3	0.393498	0.533242	0.22619	-0.0690018	0.0653846	0.255495	-0.126786	0.51088	0.408837	0.35119	0.0319139	0.148718	0.430266	0.284478	0.481731	0.468269	0.46598	-0.246016	-0.0794872	-0.0611722	0.511676	-0.0103938
G231	0.432738	-0.102793	0.379121	0.0105311	0.429625	-0.113462	0.548077	0.398489	0.328434	0.18956	0.401374	-0.124908	0.26337	0.264744	0.210623	0.0747711	-0.101557	0.158974	-0.193223	-0.265751	0.248031	-0.0800366	0.316758	0.48837	0.20989	0.298993	0.450595	0.0249542	0.401419	0.307326	-0.339835	0.149771	0.0364927	0.145742	0.0733067	0.441667	0.445925	-0.126465	0.179762	0.469505	-0.278938	0.42848	0.240888	0.258516	-0.312134	-0.0689103	0.217399	0.070696	0.273535
G232	-0.109203	0.226099	-0.033196	-0.142353	-0.0569597	0.299084	-0.0171703	-0.0270604	0.146016	0.0653846	0.0309982	0.146612	0.119139	-0.152335	-0.0990842	0.216438	0.381502	-0.322115	0.191392	-0.157647	-0.0625916	-0.0459707	-0.0904304	-0.0156593	-0.018315	-0.0885989	-0.0766941	-0.0702839	-0.096337	0.326374	-0.303297	0.189652	-0.0407509	0.251419	-0.19041	-0.107967	-0.0159341	-0.294689	0.423626	0.0111722	-0.245238	-0.0604396	-0.0880495	-0.0517857	0.0527015	-0.201648	0.395742	-0.0881868	0.21456
G233	0.468727	0.121383	0.212592	0.712042	0.408471	0.0997711	0.476877	0.243864	0.156456	0.692674	0.379716	0.0831502	0.0679029	0.278251	-0.017674	-0.0232601	-0.0147894	0.735073	-0.640385	-0.198718	0.596841	-0.432234	0.361218	0.416209	0.112912	0.438324	0.487821	0.495696	0.537775	0.225504	0.0628663	0.0224359	0.058837	-0.190339	0.544351	0.524267	0.231593	0.00975275	-0.0861264	0.120604	0.569322	0.391804	0.517995	0.45119	-0.0842491	-0.0635531	-0.204991	0.687775	-0.0538919
G234	-0.109982	-0.0658883	0.0405678	-0.0132784	-0.127518	-0.0322344	0.0844322	-0.180861	-0.0921703	-0.142033	-0.105952	-0.096337	0.0923535	0.0201923	0.112637	0.285943	0.256181	-0.0381868	0.00572344	0.00924908	-0.00526557	0.215614	-0.0965659	-0.102518	0.0385073	0.104304	-0.00320513	-0.117537	0.136676	-0.169963	-0.0737637	0.0467033	-0.0849359	-0.00114469	-0.05941	0.106181	-0.0808608	-0.0930861	-0.0947802	0.0619505	-0.0686355	0.120971	-0.0265568	0.177885	-0.0369048	0.0256868	-0.194963	0.010119	-0.192491
G235	-0.437408	-0.101419	-0.489286	-0.212088	-0.531731	-0.255495	-0.674084	-0.257784	-0.354487	-0.400504	-0.550092	0.118864	-0.409615	-0.351328	-0.219093	-0.239835	-0.0978938	-0.244551	0.382189	0.457784	-0.374405	0.399634	-0.349405	-0.499084	-0.187363	-0.456548	-0.432601	-0.0903846	-0.630495	-0.414835	0.222482	-0.153068	-0.0695055	-0.306914	-0.141165	-0.467903	-0.471108	0.164515	-0.263736	-0.317857	0.183425	-0.435256	-0.404945	-0.425733	0.271886	0.124496	-0.320696	-0.2712	-0.149725
G236	0.381575	0.05142	0.213143	0.115157	0.506599	0.0710631	0.445518	0.178367	0.442565	0.288465	0.565414	-0.206023	0.14524	0.114012	0.0935908	0.0990167	-0.149292	0.173697	-0.35108	-0.323905	0.392747	-0.161838	0.363924	0.39712	0.0853032	0.40772	0.350668	0.0175597	0.486956	0.247553	-0.359848	-0.0246798	0.00750924	0.0824643	0.229057	0.517565	0.464131	-0.111906	-0.00286175	0.426104	-0.117286	0.517199	0.409551	0.341762	-0.281803	-0.099383	-0.0359207	0.249476	0.181183
G237	0.465156	-0.105723	0.409112	0.306822	0.620147	0.0362637	0.48544	0.333745	0.342628	0.338645	0.547756	-0.141346	0.227152	0.355128	-0.0137821	0.149634	-0.117903	0.290614	-0.33924	-0.396062	0.302885	-0.103663	0.346429	0.542079	0.0908425	0.403571	0.586126	0.305769	0.436859	0.146154	-0.217674	0.0541667	0.0663919	0.136081	0.165089	0.586081	0.345788	-0.146886	-0.0841575	0.345101	-0.0275641	0.472024	0.442445	0.238965	-0.228617	-0.139423	0.142949	0.324405	0.114286
G238	-0.0495421	0.223397	-0.0489011	-0.150046	-0.192216	-0.0739927	0.00224359	-0.225412	-0.121978	-0.0018315	-0.104121	0.0199176	0.509799	-0.118361	0.576832	-0.0620421	0.162134	-0.126877	0.0402473	0.271016	0.0195055	0.106181	-0.255815	-0.335211	0.028663	0.0782509	-0.213874	-0.15522	0.0908883	0.0341117	0.108333	0.114423	-0.0229396	-0.0664377	0.0226193	-0.167308	0.112179	0.528297	-0.0077381	0.0695513	-0.0942766	-0.160485	0.104075	0.108654	-0.263049	0.486767	-0.285623	-0.163645	-0.322573
G239	0.470879	0.264423	0.301465	0.533883	0.44707	-0.0233974	0.472161	0.278159	0.202152	0.555907	0.381639	-0.040293	-0.0258242	0.119734	-0.0708791	-0.0285714	-0.108425	0.529167	-0.467582	-0.313507	0.552839	-0.494734	0.355861	0.53489	0.10348	0.297802	0.523214	0.412408	0.342216	0.259112	-0.0966575	-0.0576465	0.0194597	-0.0277473	0.443572	0.568361	0.292811	-0.115156	-0.0443223	0.367033	0.222619	0.177473	0.484112	0.381364	0.0901099	-0.159066	-0.0937729	0.511172	0.250778
G240	0.410165	-0.124451	0.397802	0.364744	0.386722	0.00750916	0.357189	0.239515	0.207647	0.418681	0.197756	-0.111447	0.188187	0.263507	0.129075	-0.170101	-0.0378663	0.422344	-0.348306	-0.15641	0.293315	-0.330952	0.411905	0.358104	0.165247	0.282692	0.433196	0.437179	0.345604	0.333791	-0.0102564	-0.0077381	0.00467033	-0.173535	0.386818	0.388416	0.265247	0.228205	-0.185806	0.23489	0.207509	0.258791	0.181136	0.243544	-0.156639	0.023489	-0.0989011	0.450229	0.0301282
G241	-0.204899	-0.06337	-0.307372	-0.129396	-0.283333	-0.117353	-0.272756	-0.213507	-0.207784	-0.256319	-0.156364	-0.0180861	-0.0043956	-0.0929029	0.0367674	-0.0293498	-0.217537	-0.137958	0.0817766	0.358745	-0.192125	0.319963	-0.279396	-0.2087	0.0344322	-0.103068	-0.158974	-0.180357	-0.153251	-0.422985	0.0427198	-0.0312271	-0.0111722	0.0645147	-0.111379	-0.12793	-0.238049	0.249222	-0.246749	0.0106227	-0.0988553	-0.00137363	-0.286218	-0.12619	0.0529304	0.161264	-0.322115	-0.169551	-0.248764
G242	-0.230403	-0.221291	-0.286355	-0.358654	-0.388416	-0.300183	-0.34359	-0.142949	-0.114148	-0.313599	-0.382875	0.0534341	-0.0889652	-0.316117	0.105266	-0.0180861	-0.145513	-0.339286	0.403388	0.517308	-0.424359	0.452656	-0.295421	-0.305403	-0.136813	-0.22619	-0.280723	-0.191896	-0.427473	-0.43457	-0.104853	-0.176648	-0.0502289	-0.130769	-0.195836	-0.312363	-0.195559	0.235256	-0.202244	0.0157509	-0.182234	-0.0512363	-0.393864	-0.272756	-0.0865842	0.190751	-0.115934	-0.386538	-0.0955586
G243	-0.0610806	-0.0105311	0.0196886	-0.195101	-0.122848	-0.284249	-0.0613553	-0.174405	-0.0546245	-0.181548	-0.224725	-0.251557	-0.156364	-0.204304	-0.210394	0.207051	0.102701	-0.158562	0.231136	-0.102198	-0.156364	0.556181	-0.0869963	-0.00325092	-0.0321429	-0.0632784	-0.13924	-0.126969	-0.21163	-0.212546	-0.0884158	-0.199038	-0.290797	-0.0768773	-0.214403	-0.0246337	-0.193636	-0.123306	-0.338187	0.165247	-0.282555	0.00352564	-0.0193223	-0.170604	0.230403	-0.108929	-0.191026	-0.112363	-0.177564
G244	-0.00938645	-0.201648	-0.0674451	-0.270192	-0.0374542	-0.212042	-0.146841	-0.0354853	0.190247	-0.159661	0.0415751	-0.202152	0.00512821	-0.0266484	0.147024	-0.201465	-0.293544	-0.145375	0.0927656	0.199908	-0.270604	0.164469	-0.0320055	-0.0224817	0.0111264	0.0171703	0.141941	-0.0467033	-0.172848	-0.0804945	0.101832	0.0619505	0.184249	0.135348	0.0127062	-0.0253663	0.0162088	0.276099	-0.0121795	0.0520147	-0.312454	0.0694139	-0.200733	-0.287683	-0.227289	0.169963	0.124863	-0.217811	0.0844322
Note: G1-G244 denote the 244 genes related to ASD
[truncated: 195 more columns]

## Sheet: E
	G1	G2	G3	G4	G5	G6	G7	G8	G9	G10	G11	G12	G13	G14	G15	G16	G17	G18	G19	G20	G21	G22	G23	G24	G25	G26	G27	G28	G29	G30	G31	G32	G33	G34	G35	G36	G37	G38	G39	G40	G41	G42	G43	G44	G45	G46	G47	G48	G49
G1	1	0.135338	0.388122	0.803768	0.660931	-0.109696	0.579891	0.390603	-0.0131148	0.472862	0.411382	0.0127883	-0.175825	0.369532	-0.122757	-0.25754	-0.252511	0.662847	-0.620553	-0.37554	0.587075	-0.325171	0.377434	0.369402	0.212743	0.326651	0.554924	0.584092	0.479131	0.225934	0.0338701	-0.101076	0.104233	-0.311523	0.446414	0.724949	0.453448	-0.100902	-0.258127	0.343042	0.436118	0.128982	0.399898	0.27935	0.141607	-0.161306	-0.149051	0.565525	0.168294
G2	0.135338	1	0.102274	0.121298	0.187558	0.216595	0.0895397	-0.0255657	0.0551474	-0.0438937	0.156932	0.253208	-0.013746	0.150009	0.0630054	0.030681	0.262807	0.122648	-0.148442	-0.169317	0.199247	-0.000816273	0.0308987	-0.0607851	0.0309204	-0.0150085	0.0973107	0.0852733	0.216487	0.257997	0.132553	0.214397	0.256625	0.0952645	0.243674	0.161219	0.125609	-0.0800057	-0.0145514	-0.0324224	0.203557	0.00340658	0.217793	0.308432	0.0335107	-0.074455	0.0767623	0.230222	-0.174955
G3	0.388122	0.102274	1	0.310848	0.383921	-0.0337937	0.471599	0.246917	0.198833	0.232311	0.311492	-0.226782	-0.09644	0.290669	-0.0439155	-0.140388	-0.0699492	0.283312	-0.314222	-0.426127	0.406624	-0.278676	0.488774	0.216465	0.185577	0.389123	0.3078	0.382832	0.339842	0.346568	0.074684	0.112439	0.215072	-0.0336413	0.361979	0.417725	0.157683	-0.182682	0.091477	0.358866	0.102796	0.349245	0.268314	0.251467	-0.173104	-0.214353	0.10038	0.389819	0.227675
G4	0.803768	0.121298	0.310848	1	0.645041	-0.16024	0.567027	0.349659	-0.0718212	0.496893	0.363178	-0.066314	-0.319337	0.268532	-0.126283	-0.360521	-0.22663	0.764413	-0.548982	-0.413393	0.588076	-0.368009	0.450855	0.305841	0.274801	0.315571	0.6204	0.628715	0.452836	0.304753	0.0812795	-0.0593267	0.105495	-0.294871	0.60451	0.707252	0.357998	0.0976154	-0.312284	0.377151	0.469575	0.148159	0.365527	0.176348	0.16233	-0.198507	-0.266334	0.693212	0.106627
G5	0.660931	0.187558	0.383921	0.645041	1	0.0174247	0.557297	0.497546	0.17404	0.477629	0.516214	0.0336196	-0.0245208	0.333965	0.0271982	-0.326629	-0.201859	0.635224	-0.622664	-0.48738	0.5263	-0.321775	0.433202	0.440668	0.00490852	0.446066	0.586117	0.501464	0.519117	0.262568	-0.0391596	-0.033859	0.0099803	-0.102274	0.565982	0.723055	0.448017	0.000228557	-0.176696	0.473493	0.316747	0.288427	0.523623	0.530828	0.00782534	-0.0665317	-0.172865	0.587336	0.113701
G6	-0.109696	0.216595	-0.0337937	-0.16024	0.0174247	1	0.06688	-0.0804628	0.23229	-0.02722	-0.0993138	0.272777	0.214223	0.124346	0.144763	-0.015531	0.312154	-0.088669	0.162417	-0.0404327	0.0859046	0.0242596	-0.281375	0.210087	-0.0564099	-0.108826	-0.0330536	-0.0820736	0.213134	0.167162	-0.160208	-0.0310293	-0.0960917	0.185229	-0.0538849	-0.0218217	0.0351435	-0.255668	0.293782	-0.0194926	-0.128242	0.209782	0.0787214	0.141237	-0.124063	-0.0316823	0.190714	0.0803975	0.102295
G7	0.579891	0.0895397	0.471599	0.567027	0.557297	0.06688	1	0.316007	0.305428	0.441996	0.434227	-0.134859	0.0265452	0.293412	-0.0705151	-0.301618	-0.0615905	0.582308	-0.549896	-0.526474	0.556666	-0.420468	0.482047	0.38995	0.194458	0.505208	0.574972	0.460824	0.559125	0.333268	0.0792007	0.0151827	0.0371676	-0.0385172	0.418226	0.711845	0.522537	-0.113658	0.0195797	0.406319	0.218968	0.331592	0.395457	0.38588	-0.145503	-0.191628	-0.11344	0.658079	0.185773
G8	0.390603	-0.0255657	0.246917	0.349659	0.497546	-0.0804628	0.316007	1	0.263613	0.282811	0.50188	-0.0201021	-0.200683	0.143566	-0.172386	-0.219556	-0.142761	0.318684	-0.445435	-0.325105	0.3078	-0.255298	0.365114	0.375518	-0.0238896	0.308889	0.306668	0.372101	0.291235	0.261588	-0.170918	-0.0682296	0.0948727	-0.109762	0.355645	0.522295	0.336252	-0.0760005	-0.277239	0.510236	0.293129	0.115704	0.316202	0.372776	0.0375159	-0.149117	-0.0541026	0.152665	0.141759
G9	-0.0131148	0.0551474	0.198833	-0.0718212	0.17404	0.23229	0.305428	0.263613	1	0.108477	0.181301	0.00107748	0.141389	0.101272	-0.0524047	-0.0257834	0.063702	-0.0906499	-0.115791	-0.237949	0.0111122	-0.113788	0.0760005	0.192455	-0.0893221	0.0689914	0.0712987	0.0514034	0.315245	0.0543638	-0.0931101	0.0889738	-0.0805498	0.219882	-0.0912376	0.185446	0.149999	-0.284662	0.107541	0.264832	-0.174084	0.304165	0.185272	0.253186	-0.142543	-0.166422	0.161698	0.156213	0.00501736
G10	0.472862	-0.0438937	0.232311	0.496893	0.477629	-0.02722	0.441996	0.282811	0.108477	1	0.189866	0.0363187	-0.00125162	0.443019	-0.0563882	-0.189756	-0.0326183	0.405905	-0.320861	-0.114159	0.253447	-0.197179	0.23353	0.427237	0.170906	0.253099	0.460672	0.408104	0.261197	0.0443291	0.102274	0.293238	0.234053	0.0106551	0.479065	0.379676	0.313298	-0.0212775	-0.0251956	0.217444	0.174867	0.298157	0.243217	0.137079	-0.0452215	-0.0924348	-0.0357092	0.340495	0.0666405
G11	0.411382	0.156932	0.311492	0.363178	0.516214	-0.0993138	0.434227	0.50188	0.181301	0.189866	1	-0.0229211	0.0543206	0.0845337	-0.00346102	-0.105822	-0.0267521	0.350531	-0.42416	-0.507289	0.343816	-0.252937	0.403959	0.349334	0.0649648	0.333422	0.332486	0.329297	0.370612	0.24595	-0.0972138	-0.0179255	0.101893	0.102035	0.232367	0.589766	0.364312	-0.154374	-0.0369175	0.496787	0.231866	0.333194	0.474856	0.474845	-0.0808986	-0.0654655	0.0729643	0.331692	0.112995
G12	0.0127883	0.253208	-0.226782	-0.066314	0.0336196	0.272777	-0.134859	-0.0201021	0.00107748	0.0363187	-0.0229211	1	0.0910852	0.185991	-0.117162	0.148464	0.231136	0.0154874	0.0112428	0.0601757	-0.0103721	0.0211034	-0.237753	-0.0813552	0.0451998	-0.192368	-0.0497491	-0.104385	0.0786343	0.0708199	-0.0477795	0.162482	0.0626136	0.0155745	0.0428707	-0.0530142	0.136645	-0.285532	0.119862	-0.136426	0.19226	-0.0401062	-0.127088	-0.0939367	0.145112	-0.0680554	0.192085	-0.0487696	-0.0219958
G13	-0.175825	-0.013746	-0.09644	-0.319337	-0.0245208	0.214223	0.0265452	-0.200683	0.141389	-0.00125162	0.0543206	0.0910852	1	0.00795594	0.318771	0.120885	0.154863	-0.140628	-0.0666405	-0.0236502	-0.0779813	-0.07698	-0.163614	0.0812029	0.0120264	0.0529272	0.0686649	-0.229852	0.179199	-0.06183	-0.115792	0.0877113	-0.0243685	0.324452	-0.182399	-0.120166	-0.0200151	0.150358	0.354535	0.0246297	-0.280374	0.28932	-0.119274	-0.0109381	-0.283116	0.250726	0.0539067	-0.13253	-0.152425
G14	0.369532	0.150009	0.290669	0.268532	0.333965	0.124346	0.293412	0.143566	0.101272	0.443019	0.0845337	0.185991	0.00795594	1	-0.0418476	-0.162939	0.231941	0.247157	-0.365788	-0.122778	0.302903	-0.200553	0.14361	0.280025	0.221732	0.0292226	0.245241	0.35164	0.128547	0.144937	0.396667	0.44513	0.423363	0.136187	0.210065	0.198028	0.206246	-0.0749121	-0.0515558	0.0977895	0.28858	0.208389	0.200923	0.186992	-0.00149106	-0.117946	0.125782	0.243108	0.0381472
G15	-0.122757	0.0630054	-0.0439155	-0.126283	0.0271982	0.144763	-0.0705151	-0.172386	-0.0524047	-0.0563882	-0.00346102	-0.117162	0.318771	-0.0418476	1	0.122735	0.24461	-0.122713	0.271275	0.190409	-0.0409987	0.148964	-0.14583	0.0540808	-0.0919341	-0.110502	0.0266758	-0.175608	0.116901	-0.0531013	-0.0719739	0.0819212	-0.000663902	0.27824	-0.199682	-0.0991609	0.0509031	0.369336	0.00251412	-0.0290267	-0.269555	0.160719	0.0148779	-0.108173	-0.287165	0.586813	-0.146918	-0.100532	-0.216661
G16	-0.25754	0.030681	-0.140388	-0.360521	-0.326629	-0.015531	-0.301618	-0.219556	-0.0257834	-0.189756	-0.105822	0.148464	0.120885	-0.162939	0.122735	1	0.00947965	-0.38736	0.204993	0.333812	-0.349702	0.42382	-0.352815	-0.0545815	-0.212111	-0.0676636	-0.34598	-0.297461	-0.127197	-0.327609	-0.00444055	0.0340332	-0.117249	0.0430666	-0.222015	-0.379654	-0.0356877	-0.278959	0.050794	-0.23525	-0.217706	-0.0774589	-0.124803	-0.108107	0.105452	0.0794179	-0.0177512	-0.252033	-0.160218
G17	-0.252511	0.262807	-0.0699492	-0.22663	-0.201859	0.312154	-0.0615905	-0.142761	0.063702	-0.0326183	-0.0267521	0.231136	0.154863	0.231941	0.24461	0.00947965	1	-0.227022	0.1329	-0.102469	0.0351651	-0.0736278	-0.08671	0.0319653	0.0923477	-0.14559	-0.0611117	-0.0689914	-0.0389961	0.255428	0.209947	0.567854	0.510933	0.57495	-0.0420435	-0.191149	0.0462557	-0.142652	0.262416	-0.0844897	0.0251086	-0.00334128	0.039475	0.0358616	-0.160088	-0.0277859	0.387947	-0.156322	-0.17515
G18	0.662847	0.122648	0.283312	0.764413	0.635224	-0.088669	0.582308	0.318684	-0.0906499	0.405905	0.350531	0.0154874	-0.140628	0.247157	-0.122713	-0.38736	-0.227022	1	-0.571293	-0.495391	0.670247	-0.441321	0.508669	0.138124	0.182464	0.395131	0.729759	0.561955	0.500876	0.412849	0.0124074	-0.118033	0.0179254	-0.308149	0.572273	0.685027	0.365464	0.0426095	-0.136949	0.362414	0.4524	0.196852	0.340212	0.265419	0.0973977	-0.137972	-0.289015	0.716873	0.0972018
G19	-0.620553	-0.148442	-0.314222	-0.548982	-0.622664	0.162417	-0.549896	-0.445435	-0.115791	-0.320861	-0.42416	0.0112428	-0.0666405	-0.365788	0.271275	0.204993	0.1329	-0.571293	1	0.554946	-0.503619	0.487772	-0.492452	-0.327456	-0.00403783	-0.495608	-0.505817	-0.587619	-0.424625	-0.258955	-0.11121	-0.0239331	-0.14226	0.200205	-0.475561	-0.672729	-0.321755	0.0968753	0.0513381	-0.46755	-0.390407	-0.163614	-0.313264	-0.477367	0.0350127	0.345131	0.0760658	-0.484137	-0.161459
G20	-0.37554	-0.169317	-0.426127	-0.413393	-0.48738	-0.0404327	-0.526474	-0.325105	-0.237949	-0.114159	-0.507289	0.0601757	-0.0236502	-0.122778	0.190409	0.333812	-0.102469	-0.495391	0.554946	1	-0.537989	0.558647	-0.581698	-0.209434	-0.179308	-0.408822	-0.423559	-0.381548	-0.450877	-0.514437	0.0531125	0.0542114	-0.0168588	0.0204939	-0.358714	-0.536923	-0.173181	0.209107	-0.175629	-0.576779	-0.230788	-0.232159	-0.293173	-0.333921	0.204819	0.409932	-0.207693	-0.559735	-0.21764
G21	0.587075	0.199247	0.406624	0.588076	0.5263	0.0859046	0.556666	0.3078	0.0111122	0.253447	0.343816	-0.0103721	-0.0779813	0.302903	-0.0409987	-0.349702	0.0351651	0.670247	-0.503619	-0.537989	1	-0.421186	0.486379	0.289581	0.128481	0.359519	0.498961	0.563805	0.417159	0.523906	-0.0724528	-0.0580642	0.112178	-0.236142	0.490123	0.656099	0.379253	-0.117467	-0.0374506	0.306081	0.251684	0.234249	0.545085	0.320251	0.0372112	-0.143806	-0.118686	0.52876	0.144437
G22	-0.325171	-0.000816273	-0.278676	-0.368009	-0.321775	0.0242596	-0.420468	-0.255298	-0.113788	-0.197179	-0.252937	0.0211034	-0.07698	-0.200553	0.148964	0.42382	-0.0736278	-0.441321	0.487772	0.558647	-0.421186	1	-0.35312	-0.0496185	-0.191781	-0.27306	-0.330003	-0.320382	-0.379371	-0.364918	-0.0860574	-0.188646	-0.295807	-0.0887561	-0.378239	-0.311849	-0.0521656	-0.127219	-0.207018	-0.242259	-0.356254	-0.196461	-0.123453	-0.0978766	0.191389	0.240583	-0.270143	-0.407016	-0.253426
G23	0.377434	0.0308987	0.488774	0.450855	0.433202	-0.281375	0.482047	0.365114	0.0760005	0.23353	0.403959	-0.237753	-0.163614	0.14361	-0.14583	-0.352815	-0.08671	0.508669	-0.492452	-0.581698	0.486379	-0.35312	1	0.250291	0.108738	0.613848	0.458756	0.526627	0.185686	0.459714	-0.044917	-0.0214734	0.110828	-0.128612	0.400681	0.611933	0.353046	-0.0338372	-0.0465929	0.52432	0.217727	0.268227	0.283704	0.36642	-0.080071	-0.239495	-0.0372547	0.444542	0.126131
G24	0.369402	-0.0607851	0.216465	0.305841	0.440668	0.210087	0.38995	0.375518	0.192455	0.427237	0.349334	-0.0813552	0.0812029	0.280025	0.0540808	-0.0545815	0.0319653	0.138124	-0.327456	-0.209434	0.289581	-0.0496185	0.250291	1	-0.00146929	0.429458	0.264135	0.294871	0.406929	-0.0212558	-0.151425	0.160458	0.00869603	0.0540373	0.268837	0.389123	0.418925	-0.270774	0.13684	0.406515	-0.0799404	0.476061	0.374996	0.262416	-0.0273506	-0.162417	-0.054342	0.163527	0.167467
G25	0.212743	0.0309204	0.185577	0.274801	0.00490852	-0.0564099	0.194458	-0.0238896	-0.0893221	0.170906	0.0649648	0.0451998	0.0120264	0.221732	-0.0919341	-0.212111	0.0923477	0.182464	-0.00403783	-0.179308	0.128481	-0.191781	0.108738	-0.00146929	1	-0.0421959	0.120406	0.204079	0.0647468	0.112047	0.163876	0.168686	0.240017	0.03227	0.200401	0.0502933	-0.144623	0.151402	0.0421088	0.115312	0.109174	0.107454	-0.179918	-0.267357	0.0274812	-0.0391267	0.0625265	0.21973	-0.0336631
G26	0.326651	-0.0150085	0.389123	0.315571	0.446066	-0.108826	0.505208	0.308889	0.0689914	0.253099	0.333422	-0.192368	0.0529272	0.0292226	-0.110502	-0.0676636	-0.14559	0.395131	-0.495608	-0.408822	0.359519	-0.27306	0.613848	0.429458	-0.0421959	1	0.428239	0.307779	0.308606	0.237579	-0.135154	-0.0661834	-0.0577595	-0.138538	0.399092	0.530175	0.392466	-0.122299	0.142521	0.375105	0.0494009	0.330569	0.382941	0.379458	0.0243467	-0.209347	-0.133314	0.350638	0.165725
G27	0.554924	0.0973107	0.3078	0.6204	0.586117	-0.0330536	0.574972	0.306668	0.0712987	0.460672	0.332486	-0.0497491	0.0686649	0.245241	0.0266758	-0.34598	-0.0611117	0.729759	-0.505817	-0.423559	0.498961	-0.330003	0.458756	0.264135	0.120406	0.428239	1	0.542365	0.418988	0.387882	0.0703849	0.00410313	0.133248	-0.156017	0.4184	0.654314	0.461687	0.0559963	-0.0839673	0.349311	0.266595	0.310717	0.334792	0.266072	0.12465	0.0547338	-0.282637	0.594563	0.0424789
G28	0.584092	0.0852733	0.382832	0.628715	0.501464	-0.0820736	0.460824	0.372101	0.0514034	0.408104	0.329297	-0.104385	-0.229852	0.35164	-0.175608	-0.297461	-0.0689914	0.561955	-0.587619	-0.381548	0.563805	-0.320382	0.526627	0.294871	0.204079	0.307779	0.542365	1	0.22872	0.422862	0.136754	0.0280471	0.213374	-0.246003	0.43109	0.598241	0.241651	0.000663902	-0.207453	0.459214	0.398744	0.12243	0.302772	0.276064	0.0898662	-0.225259	-0.0655739	0.494825	0.114877
G29	0.479131	0.216487	0.339842	0.452836	0.519117	0.213134	0.559125	0.291235	0.315245	0.261197	0.370612	0.0786343	0.179199	0.128547	0.116901	-0.127197	-0.0389961	0.500876	-0.424625	-0.450877	0.417159	-0.379371	0.185686	0.406929	0.0647468	0.308606	0.418988	0.22872	1	0.19929	-0.141619	0.0128971	0.0122876	0.00499559	0.333747	0.501703	0.405908	-0.130179	0.0478336	0.431787	0.124846	0.419837	0.286425	0.298527	-0.124737	-0.136557	-0.00956672	0.458844	0.0807893
G30	0.225934	0.257997	0.346568	0.304753	0.262568	0.167162	0.333268	0.261588	0.0543638	0.0443291	0.24595	0.0708199	-0.06183	0.144937	-0.0531013	-0.327609	0.255428	0.412849	-0.258955	-0.514437	0.523906	-0.364918	0.459714	-0.0212558	0.112047	0.237579	0.387882	0.422862	0.19929	1	-0.0733562	-0.0474418	0.187645	-0.152817	0.234205	0.414351	0.180669	-0.0702757	0.0978548	0.235511	0.330242	0.136187	0.237775	0.215376	-0.174955	-0.164855	0.124607	0.384726	0.127611
G31	0.0338701	0.132553	0.074684	0.0812795	-0.0391596	-0.160208	0.0792007	-0.170918	-0.0931101	0.102274	-0.0972138	-0.0477795	-0.115792	0.396667	-0.0719739	-0.00444055	0.209947	0.0124074	-0.11121	0.0531125	-0.0724528	-0.0860574	-0.044917	-0.151425	0.163876	-0.135154	0.0703849	0.136754	-0.141619	-0.0733562	1	0.554753	0.464952	0.108108	-0.0601978	-0.0665103	-0.0496844	0.183826	-0.239398	-0.119906	0.266324	-0.206714	-0.0426641	-0.0412166	0.21688	-0.0125271	0.0339572	0.0434804	-0.226697
G32	-0.101076	0.214397	0.112439	-0.0593267	-0.033859	-0.0310293	0.0151827	-0.0682296	0.0889738	0.293238	-0.0179255	0.162482	0.0877113	0.44513	0.0819212	0.0340332	0.567854	-0.118033	-0.0239331	0.0542114	-0.0580642	-0.188646	-0.0214734	0.160458	0.168686	-0.0661834	0.00410313	0.0280471	0.0128971	-0.0474418	0.554753	1	0.690665	0.545782	0.0765011	-0.126196	0.05185	0.0015999	0.134511	-0.0993785	0.159522	0.136927	0.13253	-0.0278077	-0.0239984	-0.0263058	0.257844	-0.1228	-0.172865
G33	0.104233	0.256625	0.215072	0.105495	0.0099803	-0.0960917	0.0371676	0.0948727	-0.0805498	0.234053	0.101893	0.0626136	-0.0243685	0.423363	-0.000663902	-0.117249	0.510933	0.0179254	-0.14226	-0.0168588	0.112178	-0.295807	0.110828	0.00869603	0.240017	-0.0577595	0.133248	0.213374	0.0122876	0.187645	0.464952	0.690665	1	0.486989	0.131224	0.0468105	0.0192315	0.132813	-0.18451	-0.112352	0.482679	-0.053319	0.0702539	-0.0524483	0.0224312	0.0510116	0.260021	-0.000206789	-0.250248
G34	-0.311523	0.0952645	-0.0336413	-0.294871	-0.102274	0.185229	-0.0385172	-0.109762	0.219882	0.0106551	0.102035	0.0155745	0.324452	0.136187	0.27824	0.0430666	0.57495	-0.308149	0.200205	0.0204939	-0.236142	-0.0887561	-0.128612	0.0540373	0.03227	-0.138538	-0.156017	-0.246003	0.00499559	-0.152817	0.108108	0.545782	0.486989	1	-0.150423	-0.213787	-0.0426423	0.0862093	0.121581	-0.12465	0.0193402	0.0921953	0.0169458	-0.089235	-0.282071	0.142195	0.261741	-0.173496	-0.229199
G35	0.446414	0.243674	0.361979	0.60451	0.565982	-0.0538849	0.418226	0.355645	-0.0912376	0.479065	0.232367	0.0428707	-0.182399	0.210065	-0.199682	-0.222015	-0.0420435	0.572273	-0.475561	-0.358714	0.490123	-0.378239	0.400681	0.268837	0.200401	0.399092	0.4184	0.43109	0.333747	0.234205	-0.0601978	0.0765011	0.131224	-0.150423	1	0.433855	0.273246	-0.0866229	-0.0319	0.228241	0.342432	0.165986	0.283943	0.230352	-0.0324441	-0.323973	-0.0884296	0.464307	0.169839
G36	0.724949	0.161219	0.417725	0.707252	0.723055	-0.0218217	0.711845	0.522295	0.185446	0.379676	0.589766	-0.0530142	-0.120166	0.198028	-0.0991609	-0.379654	-0.191149	0.685027	-0.672729	-0.536923	0.656099	-0.311849	0.611933	0.389123	0.0502933	0.530175	0.654314	0.598241	0.501703	0.414351	-0.0665103	-0.126196	0.0468105	-0.213787	0.433855	1	0.547124	-0.121494	-0.228546	0.487054	0.369794	0.291388	0.472361	0.510193	0.126914	-0.127524	-0.252424	0.593387	0.171624
G37	0.453448	0.125609	0.157683	0.357998	0.448017	0.0351435	0.522537	0.336252	0.149999	0.313298	0.364312	0.136645	-0.0200151	0.206246	0.0509031	-0.0356877	0.0462557	0.365464	-0.321755	-0.173181	0.379253	-0.0521656	0.353046	0.418925	-0.144623	0.392466	0.461687	0.241651	0.405908	0.180669	-0.0496844	0.05185	0.0192315	-0.0426423	0.273246	0.547124	1	-0.225957	-0.0978445	0.218675	0.16934	0.234141	0.430788	0.38574	0.0691006	-0.00531125	-0.150337	0.247572	0.0547668
G38	-0.100902	-0.0800057	-0.182682	0.0976154	0.000228557	-0.255668	-0.113658	-0.0760005	-0.284662	-0.0212775	-0.154374	-0.285532	0.150358	-0.0749121	0.369336	-0.278959	-0.142652	0.0426095	0.0968753	0.209107	-0.117467	-0.127219	-0.0338372	-0.270774	0.151402	-0.122299	0.0559963	0.000663902	-0.130179	-0.0702757	0.183826	0.0015999	0.132813	0.0862093	-0.0866229	-0.121494	-0.225957	1	-0.338253	-0.0628748	0.0148344	-0.149509	-0.187623	-0.257931	-0.0547121	0.524276	-0.326498	-0.02759	-0.247113
G39	-0.258127	-0.0145514	0.091477	-0.312284	-0.176696	0.293782	0.0195797	-0.277239	0.107541	-0.0251956	-0.0369175	0.119862	0.354535	-0.0515558	0.00251412	0.050794	0.262416	-0.136949	0.0513381	-0.175629	-0.0374506	-0.207018	-0.0465929	0.13684	0.0421088	0.142521	-0.0839673	-0.207453	0.0478336	0.0978548	-0.239398	0.134511	-0.18451	0.121581	-0.0319	-0.228546	-0.0978445	-0.338253	1	-0.0202327	-0.426258	0.381308	0.0415864	0.0659005	-0.29794	-0.27922	0.376933	-0.0612858	0.391561
G40	0.343042	-0.0324224	0.358866	0.377151	0.473493	-0.0194926	0.406319	0.510236	0.264832	0.217444	0.496787	-0.136426	0.0246297	0.0977895	-0.0290267	-0.23525	-0.0844897	0.362414	-0.46755	-0.576779	0.306081	-0.242259	0.52432	0.406515	0.115312	0.375105	0.349311	0.459214	0.431787	0.235511	-0.119906	-0.0993785	-0.112352	-0.12465	0.228241	0.487054	0.218675	-0.0628748	-0.0202327	1	0.119579	0.351727	0.190714	0.317051	-0.084838	-0.192717	-0.0276336	0.357887	0.147049
G41	0.436118	0.203557	0.102796	0.469575	0.316747	-0.128242	0.218968	0.293129	-0.174084	0.174867	0.231866	0.19226	-0.280374	0.28858	-0.269555	-0.217706	0.0251086	0.4524	-0.390407	-0.230788	0.251684	-0.356254	0.217727	-0.0799404	0.109174	0.0494009	0.266595	0.398744	0.124846	0.330242	0.266324	0.159522	0.482679	0.0193402	0.342432	0.369794	0.16934	0.0148344	-0.426258	0.119579	1	-0.176108	0.0439373	0.05247	0.157018	-0.14792	0.0666841	0.326651	0.0317911
G42	0.128982	0.00340658	0.349245	0.148159	0.288427	0.209782	0.331592	0.115704	0.304165	0.298157	0.333194	-0.0401062	0.28932	0.208389	0.160719	-0.0774589	-0.00334128	0.196852	-0.163614	-0.232159	0.234249	-0.196461	0.268227	0.476061	0.107454	0.330569	0.310717	0.12243	0.419837	0.136187	-0.206714	0.136927	-0.053319	0.0921953	0.165986	0.291388	0.234141	-0.149509	0.381308	0.351727	-0.176108	1	0.255254	0.268489	-0.201772	-0.0308551	0.0594573	0.219795	0.25878
G43	0.399898	0.217793	0.268314	0.365527	0.523623	0.0787214	0.395457	0.316202	0.185272	0.243217	0.474856	-0.127088	-0.119274	0.200923	0.0148779	-0.124803	0.039475	0.340212	-0.313264	-0.293173	0.545085	-0.123453	0.283704	0.374996	-0.179918	0.382941	0.334792	0.302772	0.286425	0.237775	-0.0426641	0.13253	0.0702539	0.0169458	0.283943	0.472361	0.430788	-0.187623	0.0415864	0.190714	0.0439373	0.255254	1	0.582678	0.0649645	-0.0990303	-0.066227	0.345806	0.0564099
G44	0.27935	0.308432	0.251467	0.176348	0.530828	0.141237	0.38588	0.372776	0.253186	0.137079	0.474845	-0.0939367	-0.0109381	0.186992	-0.108173	-0.108107	0.0358616	0.265419	-0.477367	-0.333921	0.320251	-0.0978766	0.36642	0.262416	-0.267357	0.379458	0.266072	0.276064	0.298527	0.215376	-0.0412166	-0.0278077	-0.0524483	-0.089235	0.230352	0.510193	0.38574	-0.257931	0.0659005	0.317051	0.05247	0.268489	0.582678	1	-0.0290049	-0.215246	-0.0223006	0.255646	0.131921
G45	0.141607	0.0335107	-0.173104	0.16233	0.00782534	-0.124063	-0.145503	0.0375159	-0.142543	-0.0452215	-0.0808986	0.145112	-0.283116	-0.00149106	-0.287165	0.105452	-0.160088	0.0973977	0.0350127	0.204819	0.0372112	0.191389	-0.080071	-0.0273506	0.0274812	0.0243467	0.12465	0.0898662	-0.124737	-0.174955	0.21688	-0.0239984	0.0224312	-0.282071	-0.0324441	0.126914	0.0691006	-0.0547121	-0.29794	-0.084838	0.157018	-0.201772	0.0649645	-0.0290049	1	0.054908	-0.291344	0.0616341	0.0468759
G46	-0.161306	-0.074455	-0.214353	-0.198507	-0.0665317	-0.0316823	-0.191628	-0.149117	-0.166422	-0.0924348	-0.0654655	-0.0680554	0.250726	-0.117946	0.586813	0.0794179	-0.0277859	-0.137972	0.345131	0.409932	-0.143806	0.240583	-0.239495	-0.162417	-0.0391267	-0.209347	0.0547338	-0.225259	-0.136557	-0.164855	-0.0125271	-0.0263058	0.0510116	0.142195	-0.323973	-0.127524	-0.00531125	0.524276	-0.27922	-0.192717	-0.14792	-0.0308551	-0.0990303	-0.215246	0.054908	1	-0.309106	-0.134402	-0.262633
G47	-0.149051	0.0767623	0.10038	-0.266334	-0.172865	0.190714	-0.11344	-0.0541026	0.161698	-0.0357092	0.0729643	0.192085	0.0539067	0.125782	-0.146918	-0.0177512	0.387947	-0.289015	0.0760658	-0.207693	-0.118686	-0.270143	-0.0372547	-0.054342	0.0625265	-0.133314	-0.282637	-0.0655739	-0.00956672	0.124607	0.0339572	0.257844	0.260021	0.261741	-0.0884296	-0.252424	-0.150337	-0.326498	0.376933	-0.0276336	0.0666841	0.0594573	-0.066227	-0.0223006	-0.291344	-0.309106	1	-0.161807	0.182856
G48	0.565525	0.230222	0.389819	0.693212	0.587336	0.0803975	0.658079	0.152665	0.156213	0.340495	0.331692	-0.0487696	-0.13253	0.243108	-0.100532	-0.252033	-0.156322	0.716873	-0.484137	-0.559735	0.52876	-0.407016	0.444542	0.163527	0.21973	0.350638	0.594563	0.494825	0.458844	0.384726	0.0434804	-0.1228	-0.000206789	-0.173496	0.464307	0.593387	0.247572	-0.02759	-0.0612858	0.357887	0.326651	0.219795	0.345806	0.255646	0.0616341	-0.134402	-0.161807	1	0.161698
G49	0.168294	-0.174955	0.227675	0.106627	0.113701	0.102295	0.185773	0.141759	0.00501736	0.0666405	0.112995	-0.0219958	-0.152425	0.0381472	-0.216661	-0.160218	-0.17515	0.0972018	-0.161459	-0.21764	0.144437	-0.253426	0.126131	0.167467	-0.0336631	0.165725	0.0424789	0.114877	0.0807893	0.127611	-0.226697	-0.172865	-0.250248	-0.229199	0.169839	0.171624	0.0547668	-0.247113	0.391561	0.147049	0.0317911	0.25878	0.0564099	0.131921	0.0468759	-0.262633	0.182856	0.161698	1
G50	0.623361	-0.0365582	0.395588	0.65144	0.585703	-0.196961	0.521751	0.491734	0.136775	0.308257	0.31554	-0.214527	-0.278023	0.225977	-0.107563	-0.325649	-0.290495	0.548394	-0.495913	-0.437272	0.495761	-0.239821	0.568594	0.280308	0.0374942	0.368313	0.550027	0.57741	0.318053	0.274039	-0.0414778	-0.231114	0.0383866	-0.227435	0.320708	0.683612	0.471417	0.0418258	-0.409192	0.492953	0.374321	0.129178	0.306821	0.26912	0.0997486	-0.17465	-0.241062	0.520445	0.084838
G51	0.269925	0.185947	0.219316	0.315092	0.272777	0.172038	0.29117	0.110132	0.118991	0.0383431	0.293686	0.0258704	-0.0184478	0.0489437	-0.00284063	-0.111503	-0.0594573	0.433267	-0.280178	-0.433202	0.323952	-0.236621	0.356189	0.110153	0.0967229	0.267487	0.363546	0.209521	0.448286	0.198093	-0.257791	-0.132029	-0.156931	-0.0583254	0.371513	0.349855	0.251631	-0.182181	0.125608	0.19916	0.0596097	0.392236	0.174606	0.260848	-0.108129	-0.149247	0.000794506	0.435814	0.227392
G52	0.383202	0.215855	0.201337	0.32689	0.302794	0.0953734	0.251597	0.276586	-0.0196885	-0.088582	0.311426	0.0468323	-0.182051	-0.0113952	-0.0980072	-0.217553	-0.0786126	0.31827	-0.164419	-0.374365	0.346524	-0.0842503	0.152273	-0.0427183	0.114333	-0.0380819	0.254971	0.255689	0.240322	0.320991	-0.0937304	-0.183749	0.010568	-0.127828	0.250857	0.36901	0.162842	-0.0860134	-0.280047	0.193718	0.409475	0.00610572	0.286011	0.139735	-0.00961026	-0.0017305	-0.00227468	0.288406	0.0832055
G53	0.126849	-0.163396	-0.093915	0.153492	0.0891479	-0.179504	0.0908675	0.171385	0.00695465	0.173997	-0.0989111	-0.0613729	-0.0960917	0.297526	-0.131137	-0.19017	0.031987	0.0447427	-0.176304	0.184597	0.00634516	-0.130702	-0.0065193	0.11381	0.0680772	-0.114724	0.0699492	0.271993	-0.128111	-0.0468105	0.351674	0.229024	0.22872	-0.01749	0.0580425	0.0813117	0.114747	0.19202	-0.285075	0.003929	0.18993	-0.101773	-0.0140943	0.0594356	0.185294	-0.024042	-0.185076	0.0104592	-0.061264
G54	0.0556045	-0.0426748	0.14435	-0.0209075	-0.0522088	0.251292	0.123606	-0.104429	0.0549733	0.0692744	0.0428491	0.176652	0.212808	0.179961	-0.177937	-0.156496	0.0907369	0.0720388	-0.159152	-0.189909	0.17219	-0.421839	-0.0745638	0.138908	0.103884	0.0172288	-0.0505763	0.00919668	0.14792	0.116335	-0.0282541	0.152317	0.0464623	0.073149	0.095221	-0.0838585	-0.0736827	-0.13721	0.499766	-0.0276118	0.0311816	0.266573	0.0185784	-0.116901	-0.332419	-0.18414	0.47604	0.0823783	0.36063
G55	-0.147158	0.0382125	0.103144	-0.200836	-0.160414	0.362828	0.0728225	-0.0854692	0.0367541	-0.122104	0.086101	0.135077	0.0705151	-0.0858828	0.0336196	-0.143414	0.409432	-0.0930007	0.166639	-0.358932	0.119535	-0.0701015	0.112047	0.0509246	0.0745638	0.087929	-0.0875371	-0.106061	0.00564861	0.406907	-0.258248	-0.109413	-0.18586	0.0502933	-0.00136046	-0.0533407	0.0468979	-0.372558	0.450572	0.088952	-0.158651	0.0745856	0.00560508	0.0304415	-0.295066	-0.189756	0.41163	-0.00660637	0.172408
G56	-0.156518	-0.0147256	-0.110654	-0.121886	-0.0605022	0.0042555	-0.150118	-0.0922824	-0.0830313	-0.121581	-0.25408	-0.102709	0.284596	0.0608722	0.507232	-0.116161	0.126131	-0.141868	0.155886	0.320186	-0.0857305	-0.0199933	-0.166182	-0.146679	-0.00523503	-0.133836	-0.0198844	-0.10186	-0.0836843	-0.0368629	0.197942	0.144763	0.134511	0.216791	-0.194175	-0.186709	-0.0789395	0.644279	-0.121951	-0.251227	-0.16431	-0.00993677	-0.126631	-0.128481	-0.105495	0.4652	-0.216704	-0.12933	-0.19276
G57	-0.0992044	0.0257616	-0.120079	-0.142042	-0.140083	0.0208422	-0.117228	-0.233051	-0.0224747	-0.111677	-0.168599	0.0426965	0.0449168	-0.0682731	-0.0299191	0.328349	-0.269642	-0.0818559	0.213744	0.300508	-0.149596	0.464851	-0.2605	-0.0730837	-0.0645509	-0.179656	-0.0441985	-0.145155	-0.0520129	-0.2334	-0.111852	-0.191737	-0.28329	-0.14448	-0.195612	-0.110872	0.0217565	-0.168642	-0.148877	-0.129309	-0.159282	0.061917	-0.191324	-0.0904975	0.228524	0.237144	-0.312176	-0.0736278	-0.137362
G58	0.666547	0.152926	0.488142	0.669181	0.619225	-0.120471	0.565329	0.556666	0.0840544	0.386489	0.43106	-0.12637	-0.25754	0.294827	-0.0988126	-0.328305	-0.102208	0.614588	-0.576648	-0.537271	0.620509	-0.278284	0.683787	0.255668	0.111242	0.513719	0.5465	0.581676	0.280482	0.506579	-0.0857636	-0.103971	0.163701	-0.198093	0.472883	0.787791	0.439571	-0.0747162	-0.288558	0.475996	0.439275	0.14657	0.436489	0.383115	0.0815076	-0.170971	-0.165878	0.565155	0.109457
G59	-0.00867426	0.0122659	0.0947639	-0.139365	0.072583	0.0514905	-0.00813008	-0.109326	-0.0560834	-0.054995	0.0730514	-0.0842503	0.402749	0.0308116	0.687574	0.110828	0.0135719	-0.0327706	0.12452	0.06725	-0.00360249	0.107149	-0.122539	-0.0204939	0.00107748	-0.00497382	0.124063	-0.146853	0.150009	-0.000424462	-0.134468	-0.115443	-0.0530142	0.0953081	-0.15765	-0.0685561	0.0610249	0.266638	-0.00743353	-0.0605239	-0.223974	0.111982	-0.0547121	-0.0708199	-0.297243	0.542582	-0.0925001	0.0053874	-0.158912
G60	0.53714	0.162068	0.292454	0.531677	0.479392	-0.118838	0.350421	0.362828	-0.13832	0.208324	0.437035	-0.150684	-0.104407	0.125826	-0.078199	-0.181702	-0.0961788	0.52506	-0.49772	-0.512478	0.450746	-0.247265	0.453706	0.258323	0.148115	0.35891	0.427716	0.505991	0.255189	0.382397	-0.0924571	-0.145112	0.157018	-0.153536	0.325084	0.585486	0.232367	-0.0516647	-0.155386	0.439732	0.437142	0.123997	0.268293	0.360042	-0.00913138	-0.0848162	-0.0882119	0.429153	0.0330536
G61	0.18906	0.0824218	0.217597	0.0669235	0.32824	0.144937	0.250313	0.171689	0.3041	0.152512	0.283107	-0.230788	0.183487	0.146461	0.132312	0.0365364	0.0143773	0.0877113	-0.243696	-0.33662	0.0623959	0.012157	0.246112	0.335684	-0.0503151	0.319337	0.203121	0.105147	0.357103	-0.0339896	-0.0506854	0.0610681	-0.0710375	0.14152	0.107759	0.245959	0.234152	-0.235816	0.0410858	0.345915	-0.164789	0.373059	0.266442	0.414591	-0.239647	-0.114703	0.0469629	0.168054	-0.0164234
G62	-0.0104592	0.245938	0.0494662	-0.129504	0.0260446	0.273038	0.0850992	0.00604042	0.0708416	-0.0778289	0.226501	0.10876	0.141302	-0.000838041	0.022823	-0.0666188	0.208193	-0.0873848	0.184489	-0.0393879	0.0938061	-0.261349	-0.117249	-0.00980616	-0.065008	-0.0793309	-0.084185	-0.12711	0.0428707	0.0728007	-0.0955698	0.151642	0.150205	0.42234	-0.00220938	-0.0676418	0.0582169	-0.064725	0.217727	-0.233944	0.0840761	0.0754563	0.225759	0.141542	-0.213461	0.112722	0.347852	-0.0382778	0.0960264
G63	0.11343	-0.012636	0.0682517	0.168316	0.255125	0.0572918	0.189605	0.0891049	0.0390616	0.204722	0.172758	-0.0336524	0.112429	0.0993029	0.122638	-0.275075	-0.103907	0.290127	-0.0923917	-0.107455	0.222572	-0.224106	0.182999	0.164953	-0.0404656	0.152949	0.231627	0.213353	0.267598	0.164235	-0.0518502	0.01675	0.0595012	-0.00182846	0.201621	0.187396	0.0476273	0.164387	-0.0264909	0.128417	0.0637023	0.29743	0.0897579	0.0991614	-0.182716	0.0664015	-0.0827161	0.112853	-0.0361339
G64	-0.181898	0.196265	0.0975501	-0.238297	-0.0268717	0.432549	0.0827701	-0.106257	0.242651	-0.0436543	-0.034534	0.242128	0.232115	-0.0713423	0.111546	-0.203731	0.428217	-0.097093	0.132465	-0.307996	0.0998357	-0.157693	0.0595226	0.00701995	0.0653563	0.0561705	-0.0198191	-0.0886037	0.136013	0.411021	-0.241825	0.0403239	-0.0832055	0.158303	0.0276553	-0.0685125	0.042392	-0.287056	0.549548	0.0371894	-0.236404	0.25619	0.0331407	0.101055	-0.383659	-0.139452	0.423015	-0.0382125	0.12502
G65	-0.0944374	-0.14337	-0.209586	-0.027503	-0.283856	-0.423123	-0.314701	-0.147615	-0.427499	-0.0630707	-0.258738	-0.0943068	-0.350529	-0.0105245	-0.0757393	-0.0869277	-0.136709	-0.155799	0.272733	0.389079	-0.250726	0.266725	-0.00068567	-0.273582	0.127219	-0.217357	-0.219142	-0.0237155	-0.464917	-0.150358	0.181181	-0.0238678	0.0643332	-0.220796	-0.199094	-0.194001	-0.262961	0.302184	-0.32541	-0.193348	0.118229	-0.351901	-0.2876	-0.274605	0.262829	0.108173	-0.156082	-0.266921	-0.0923477
G66	0.280112	0.182965	0.406363	0.264222	0.27713	0.143	0.361478	0.2031	0.0379295	0.061177	0.288222	0.104842	-0.143544	0.100968	-0.215463	-0.282746	0.17367	0.348962	-0.296503	-0.68999	0.513349	-0.531677	0.448722	0.104254	0.204754	0.298593	0.299594	0.398483	0.214789	0.686007	-0.0585326	-0.0908458	0.112526	-0.179613	0.273996	0.307779	0.122474	-0.252794	0.29339	0.306712	0.214005	0.121516	0.190954	0.182029	-0.121059	-0.334335	0.330634	0.397808	0.309999
G67	0.401097	0.0923373	0.294121	0.322038	0.318185	-0.0237591	0.420296	0.291324	0.0465822	0.181954	0.233021	-0.155104	-0.0916408	0.0870152	0.0122877	-0.251631	-0.0571612	0.139464	-0.195471	-0.158086	0.375553	-0.0961249	0.290965	0.416683	0.0256202	0.355864	0.371863	0.380222	0.229385	0.198954	-0.0246735	-0.00630166	0.0666409	-0.0747166	0.137744	0.491889	0.331378	-0.0677619	-0.0857962	0.161231	0.0135393	0.232367	0.33339	0.23869	0.0902694	-0.0422832	-0.0967126	0.164355	0.119645
G68	0.014312	-0.0189702	-0.0378207	-0.0440243	-0.0776113	0.185055	0.100053	-0.176805	-0.0421306	0.0562358	-0.0391922	0.20902	0.0315299	0.163113	0.208824	0.253208	0.27922	0.0438067	0.0156398	0.0579119	0.131768	-0.0296579	-0.04237	-0.0251739	-0.0293967	-0.00560508	0.0388873	-0.0488349	0.0147038	0.0953516	0.159316	0.0237372	0.0241726	-0.0439155	-0.0377771	-0.0312905	0.262983	-0.127262	0.0525789	-0.101359	0.0364711	-0.0350997	-0.0416952	0.00408137	0.0923695	0.228676	0.0433931	0.102012	0.0775895
G69	0.0954387	0.0605675	-0.0736931	0.17798	0.038539	-0.0689043	0.249878	-0.0767406	0.0779813	0.147114	0.111645	-0.0803104	0.0180124	0.109587	-0.139975	-0.239973	-0.0269806	0.159761	-0.0742373	-0.0922171	0.00832599	-0.227218	0.117794	-0.0815294	0.36322	0.0573677	0.176065	0.199377	0.0293532	-0.0639196	0.375216	0.0882119	0.0549515	0.00747706	0.0223441	0.149683	0.0689918	0.223169	-0.0552563	0.129265	0.00284063	-0.0384519	-0.0288743	0.0410422	0.21246	0.0827483	-0.0721259	0.237253	-0.0339896
G70	0.518021	0.165498	0.270787	0.553132	0.565071	0.0447647	0.597983	0.324966	0.135763	0.252948	0.255736	-0.0119394	-0.00586632	0.321069	-0.06158	-0.473528	-0.189736	0.653555	-0.530102	-0.506898	0.453513	-0.39682	0.376217	0.17871	0.181388	0.269644	0.614483	0.410348	0.49387	0.303742	0.13276	-0.0601107	-0.0367869	-0.202382	0.350325	0.573811	0.323193	0.0824005	-0.101828	0.456811	0.281518	0.167751	0.246146	0.237711	-0.079081	-0.11171	-0.281844	0.553643	-0.0271875
G71	0.490297	0.107041	0.30595	0.51644	0.527389	0.109718	0.625973	0.283007	0.210261	0.203753	0.472647	-0.0676418	0.0582166	0.141041	0.0128318	-0.123301	-0.0108945	0.589578	-0.511324	-0.61744	0.545782	-0.465961	0.433419	0.254536	0.137689	0.464547	0.535617	0.387055	0.475082	0.330417	-0.0508704	-0.0739108	-0.0571718	-0.0615035	0.402249	0.562216	0.365507	-0.221732	0.112134	0.362567	0.224062	0.327543	0.454316	0.33908	-0.0780684	-0.155146	0.0256963	0.670008	0.216008
G72	0.398135	0.190714	0.299529	0.336685	0.335358	0.0171417	0.361761	0.386663	0.0644421	0.413763	0.31135	0.065008	-0.0185131	0.394347	-0.141324	-0.206952	0.280178	0.321057	-0.407299	-0.390429	0.456884	-0.432723	0.335031	0.336163	0.175608	0.158085	0.264505	0.413546	0.326542	0.423863	0.149814	0.302772	0.414808	0.0151391	0.392649	0.352119	0.175478	-0.121886	0.0536237	0.269316	0.285837	0.215812	0.289625	0.248441	-0.0486172	-0.287905	0.269577	0.218903	0.0198844
G73	0.407625	-0.0953951	0.229438	0.385705	0.371056	-0.129766	0.465722	0.468073	0.290299	0.301357	0.508998	-0.0659875	0.125456	0.18906	-0.0864705	-0.252098	-0.0846856	0.291235	-0.481677	-0.349223	0.290561	-0.41705	0.370338	0.331831	0.0850339	0.303969	0.380024	0.270948	0.340712	0.153253	-0.0280038	0.100184	0.221863	0.154428	0.180048	0.489753	0.346744	0.0291573	-0.0578901	0.328545	0.254275	0.320643	0.22491	0.132182	-0.032836	-0.118556	0.03695	0.229982	0.18327
G74	0.372863	0.129875	0.266116	0.268663	0.337534	0.300987	0.435857	0.316072	0.36322	0.279742	0.304635	-0.0305504	0.107607	0.129918	0.199138	-0.118425	0.0730837	0.103688	-0.138625	-0.167989	0.352989	-0.0188614	0.106801	0.503183	0.00308007	0.178002	0.272058	0.16542	0.369141	0.119709	-0.0709726	-0.00789064	-0.111307	0.0233454	0.0965053	0.452204	0.506288	-0.156235	0.0447427	0.330808	-0.12391	0.370098	0.379611	0.300508	0.0575201	0.0776548	-0.149073	0.205015	0.151076
G75	0.667526	0.195307	0.410738	0.50634	0.668441	-0.0173812	0.464046	0.234553	0.0451998	0.358736	0.451075	0.0453739	0.0606328	0.327979	0.0818776	-0.140954	-0.176348	0.520619	-0.526605	-0.388122	0.534071	-0.359759	0.296046	0.30114	0.0436108	0.364308	0.513371	0.448069	0.392736	0.202077	-0.0136482	-0.0166193	0.154929	-0.0927178	0.335945	0.561977	0.33327	0.00157813	-0.0307028	0.251793	0.309259	0.239103	0.472013	0.371013	-0.014029	0.00847836	-0.12859	0.505861	0.153296
G76	-0.0985514	-0.00277533	-0.144502	-0.00527857	-0.133205	0.0138113	0.0383431	-0.23858	0.0428054	-0.133183	0.00546362	0.107454	0.0734102	-0.226478	-0.143784	-0.0218217	0.000272091	-0.0345991	0.0110687	-0.157889	-0.0616776	-0.00373309	0.108238	-0.0180777	-0.0280689	0.113701	0.0360357	-0.115356	0.0225183	0.0403239	-0.0323028	-0.197941	-0.211219	-0.16529	-0.172342	-0.01244	-0.00390725	-0.0290049	0.179656	0.0178165	-0.200531	0.0341855	-0.103014	0.0327053	0.0716906	-0.102078	0.026001	0.0761528	0.107585
G77	0.279525	-0.0065846	0.0292661	0.371578	0.246895	-0.247048	0.0514687	0.167728	-0.241671	0.200183	0.0534934	-0.159522	-0.118751	0.19226	0.399898	-0.261458	-0.0663576	0.295611	-0.121951	0.0659875	0.123997	-0.0689479	0.139082	-0.13967	0.164463	-0.0478118	0.30299	0.259412	-0.0291137	0.129265	0.201871	0.015248	0.303316	-0.025631	0.161829	0.20101	0.0567476	0.618572	-0.546914	0.0135719	0.31359	-0.174258	0.0152262	-0.146461	0.0145732	0.415679	-0.402902	0.238493	-0.278262
G78	0.589904	0.0259793	0.279176	0.628215	0.616439	-0.174106	0.589295	0.446959	0.0376248	0.288036	0.418021	-0.239473	-0.148703	0.178459	-0.244175	-0.325192	-0.260239	0.683199	-0.65673	-0.51694	0.552334	-0.466745	0.56596	0.272124	0.116531	0.471534	0.546849	0.489383	0.323233	0.266551	-0.0726269	-0.1127	0.0155092	-0.159173	0.512043	0.645824	0.340758	-0.0110251	-0.100445	0.339363	0.290713	0.195263	0.429305	0.405579	0.0113516	-0.217183	-0.286447	0.57199	0.186557
G79	-0.251793	0.0588696	-0.0807893	-0.171211	-0.151011	-0.0816382	-0.0845986	-0.0756304	-0.0307028	0.0239331	0.0495861	0.0408463	0.208346	0.0969841	0.206626	0.0357745	0.551877	-0.093719	0.131812	0.0545162	-0.108216	-0.206474	0.00103395	-0.00181757	0.0662487	-0.00847836	-0.0257616	-0.225172	-0.0770018	-0.0151174	0.242707	0.598611	0.520488	0.625211	-0.00667167	-0.209913	-0.012723	0.236861	0.0999227	-0.162547	0.0901492	-0.00484322	0.0150521	-0.0739326	-0.134685	0.174802	0.173583	-0.23562	-0.337621
G80	0.441582	0.137145	0.419575	0.345588	0.542038	-0.0193838	0.481177	0.37689	0.202882	0.285489	0.468826	-0.0977025	-0.0247168	0.096527	-0.0555175	-0.0735843	-0.0225836	0.460868	-0.463001	-0.567397	0.424691	-0.216944	0.528978	0.375627	0.0994438	0.516527	0.428435	0.410302	0.459736	0.30151	-0.246363	-0.0906934	-0.0291573	-0.0723436	0.487881	0.553488	0.374051	-0.305166	0.0487261	0.433702	0.142217	0.388775	0.36679	0.431569	-0.0742373	-0.246591	0.0444379	0.371666	0.203143
G81	0.65525	0.294544	0.427303	0.704988	0.606143	-0.0838802	0.590122	0.478586	0.0336631	0.425365	0.442455	-0.00105571	-0.185533	0.32652	-0.182247	-0.275672	-0.058652	0.685963	-0.566766	-0.504424	0.704683	-0.318989	0.584092	0.287818	0.199486	0.384552	0.596826	0.609451	0.39093	0.482091	0.0763927	0.0111122	0.221101	-0.229416	0.561498	0.760168	0.397103	-0.0570629	-0.278806	0.373211	0.411696	0.118882	0.412262	0.381831	0.176478	-0.199247	-0.219839	0.641427	0.0492267
G82	0.493628	0.122844	0.344826	0.495913	0.618028	0.0516864	0.54317	0.409258	0.144328	0.314156	0.609868	-0.0455916	0.0516864	0.229982	0.121799	-0.261458	0.00795594	0.513958	-0.431351	-0.48109	0.513675	-0.226238	0.451856	0.482004	0.0813117	0.365984	0.595216	0.397024	0.526431	0.29942	-0.125195	-0.0451562	0.0461358	-0.0522088	0.315658	0.630566	0.521786	-0.0893221	-0.000315626	0.481786	0.124041	0.395087	0.407669	0.443345	-0.0520782	0.0198626	-0.103427	0.472905	0.151729
G83	0.466701	0.122365	0.414656	0.484529	0.545869	-0.0729095	0.468486	0.322428	0.0604369	0.215442	0.510522	-0.183574	-0.0601539	0.193566	-0.0699056	-0.122865	-0.0702974	0.484855	-0.492496	-0.485835	0.539796	-0.165268	0.473689	0.378152	0.195198	0.487163	0.487315	0.519444	0.363655	0.307082	-0.0297343	-0.102252	0.0363405	-0.150314	0.335575	0.571772	0.343043	-0.131638	-0.0731272	0.547349	0.186426	0.354361	0.467398	0.437142	0.00238352	-0.121342	-0.135795	0.509975	-0.0365582
G84	0.207301	0.122735	0.144937	0.165399	0.191041	0.0265234	0.198899	0.070711	-0.0347515	0.177784	0.186666	0.0308987	0.118708	0.0926089	-0.0680772	-0.160741	-0.041434	0.185272	-0.297722	-0.127241	0.198572	-0.142195	0.192978	0.312067	0.0474418	0.148725	0.102622	0.182377	0.235141	0.0968535	0.00690027	0.0207769	-0.0310946	-0.203774	0.205646	0.172103	0.117653	-0.117467	0.206343	0.107977	0.0306375	0.245002	0.0350344	0.255602	-0.14718	-0.172451	0.109065	0.17515	0.0938279
G85	-0.262176	0.0162928	-0.191345	-0.241671	-0.133444	0.0576289	-0.278327	-0.212307	-0.151315	-0.122735	-0.194492	-0.159717	0.316028	-0.149683	0.656665	0.0355569	0.0301803	-0.243565	0.380612	0.427564	-0.180309	0.185229	-0.294871	-0.159304	-0.128743	-0.224693	-0.0586737	-0.233835	-0.0665317	-0.0990085	-0.011602	-0.030028	0.051447	0.172125	-0.327696	-0.259978	-0.166336	0.671749	-0.157671	-0.240278	-0.233465	0.0374724	-0.169143	-0.216204	-0.0804845	0.761082	-0.251793	-0.217684	-0.231092
G86	0.309259	0.0582384	0.10863	0.207453	0.131442	-0.223626	0.0706022	0.174759	-0.215551	0.173844	0.23831	0.0986602	-0.0504022	0.30127	-0.205472	-0.133466	0.303882	0.145612	-0.321906	-0.195438	0.176783	-0.349768	0.34191	0.0948074	0.211741	0.244349	0.11738	0.329198	-0.0578466	0.225215	0.281648	0.379959	0.487489	0.109914	0.232377	0.166444	0.093393	0.0133978	-0.0140508	0.128634	0.424995	-0.0169894	0.139213	0.129548	0.0641808	-0.237731	0.317378	-0.0440461	0.0539938
G87	-0.530131	0.115421	-0.176783	-0.428304	-0.258367	0.129374	-0.190279	-0.194893	0.0926089	-0.078199	-0.226207	0.324191	0.0727354	-0.0253262	-0.198441	0.126283	0.282528	-0.32332	0.247265	0.116814	-0.308649	0.00442964	-0.265528	-0.269294	-0.0544726	-0.224366	-0.309607	-0.336381	-0.277957	-0.123475	0.126741	0.265028	0.0563011	0.269185	0.0136154	-0.478543	-0.190084	-0.115095	0.311044	-0.267008	-0.121908	-0.11061	-0.156692	-0.0844244	-0.132944	-0.171907	0.228763	-0.174541	-0.0705369
G88	0.330701	0.158195	0.162581	0.312787	0.223867	-0.17945	0.220634	0.335055	-0.0513493	0.19743	0.376393	0.0687632	-0.22428	0.258063	-0.00225293	-0.0663579	0.00855459	0.355451	-0.0868737	-0.0929904	0.281104	-0.140313	0.251414	0.0434804	0.176817	0.0675334	0.25654	0.223486	0.152753	0.163582	0.207619	0.169089	0.254581	0.022932	0.135143	0.337373	0.388648	0.0802347	-0.314474	0.0968649	0.383553	0.0778838	0.197213	0.141085	0.205256	0.118132	-0.00301479	0.217032	-0.0311056
G89	0.0992697	-0.0256092	0.346807	0.152817	0.157933	-0.0117435	0.251184	0.217967	0.176957	0.120602	0.143099	-0.222712	0.0923912	0.164354	0.167467	-0.270208	0.215746	0.0102633	-0.0930878	-0.334182	0.187841	-0.329916	0.371013	0.213722	0.120558	0.0950904	0.142521	0.280265	0.154341	0.276978	0.0909007	0.266813	0.344935	0.335271	0.0391485	0.161241	0.131388	0.163505	-0.0671847	0.346568	0.191694	0.0766535	0.0444379	-0.000794506	-0.264244	0.0354698	0.155386	0.106758	0.0626136
G90	0.046484	0.05173	0.103405	0.0347297	0.260957	0.19768	0.207061	0.104603	0.309455	0.117293	0.268468	0.0421959	0.347003	-0.0655304	0.283682	0.106584	0.0355786	0.0639414	-0.0890391	-0.188494	0.0283954	-0.0574765	-0.0412599	0.316855	-0.00847836	0.242172	0.0951122	-0.17145	0.477324	-0.167706	-0.340551	0.0277206	-0.185969	0.284814	0.112047	0.142935	0.157313	-0.17909	0.328806	0.183291	-0.222146	0.436815	0.255624	0.176587	-0.18771	0.0142467	0.0589567	0.117598	0.106279
G91	0.390494	0.0821606	0.449723	0.452009	0.526104	-0.0244991	0.414678	0.287383	0.0649645	0.268293	0.314866	-0.0955693	-0.197593	0.10863	-0.0448297	-0.14559	-0.104559	0.390081	-0.389079	-0.322123	0.405209	-0.119535	0.500637	0.392671	0.0577377	0.32319	0.477237	0.505752	0.209456	0.306298	0.0336742	0.0676854	0.0280907	-0.207801	0.386707	0.517963	0.405929	-0.224954	-0.0394967	0.368248	0.173213	0.296198	0.409105	0.336076	0.0249997	-0.0881902	-0.109457	0.386119	0.0511205
G92	0.544563	0.230853	0.370817	0.547415	0.523384	-0.0669018	0.534463	0.313177	-0.0666188	0.217488	0.404362	-0.028526	-0.0896921	0.247004	-0.0468976	-0.359236	-0.020298	0.628367	-0.539753	-0.589121	0.625407	-0.438273	0.583918	0.233051	0.0648774	0.53677	0.652616	0.551137	0.360303	0.500767	-0.0335653	-0.0884949	0.0957652	-0.177545	0.491364	0.637052	0.419545	-0.0653563	-0.0271112	0.399201	0.441451	0.224127	0.419249	0.326237	-0.00876133	-0.121211	-0.0711464	0.584245	0.253426
G93	0.238776	0.0419129	0.369794	0.233661	0.292193	-0.174062	0.455796	0.299398	0.151359	0.0480731	0.499464	-0.141759	-0.0481384	0.064355	-0.0836626	-0.0602192	-0.0120482	0.313438	-0.249116	-0.391017	0.381809	-0.237361	0.457733	0.213591	0.073236	0.361021	0.241149	0.230962	0.233574	0.249464	-0.0805938	0.0347515	0.10974	0.116988	0.141694	0.461521	0.346417	-0.168925	-0.00288417	0.286664	0.158738	0.260086	0.292433	0.256103	0.0681207	-0.125195	-0.0135501	0.301292	0.0203198
G94	-0.118577	0.0860134	0.0815729	-0.207235	-0.0428271	0.145373	0.0349256	-0.0437196	0.146701	0.0642461	-0.0779382	0.189713	0.378087	0.0726919	-0.146918	0.0487043	0.179852	-0.0958305	-0.115465	-0.0917165	-0.0123312	0.042	-0.000968644	0.19239	0.159913	0.110327	0.0481384	-0.0921736	0.0848162	0.0588261	-0.0119503	0.211959	0.053319	0.00982793	0.00699818	-0.0234978	0.0762403	-0.269403	0.427716	0.0736496	-0.193261	0.262894	-0.0461358	0.0933925	-0.165442	-0.209804	0.158303	-0.15495	-0.00371132
G95	-0.133379	0.0237808	-0.0768494	-0.168403	-0.0171635	0.0658569	-0.0175989	-0.2137	-0.0237808	0.0646597	-0.143893	-0.135469	0.54071	-0.048269	0.509409	0.0524918	0.0263928	-0.111917	0.0443291	0.128634	-0.0052568	-0.0122876	-0.216639	-0.0324659	-0.0274812	-0.0717994	0.0859699	-0.0773283	0.09718	-0.0270241	-0.038746	-0.000272091	-0.0149215	0.0777419	-0.193783	-0.16751	-0.111514	0.549765	0.0948945	-0.0921518	-0.306059	0.175368	-0.121603	-0.10284	-0.326564	0.50129	-0.157214	-0.0567364	-0.155843
G96	-0.151294	0.0699927	-0.159848	-0.153274	-0.0584778	-0.0545379	-0.140649	-0.147027	-0.135817	-0.0337502	-0.155789	-0.154123	0.277914	-0.129374	0.625777	0.0490526	-0.0417605	-0.154711	0.278044	0.414308	-0.0996833	0.182573	-0.293238	-0.19313	-0.13758	-0.215594	0.0471588	-0.171167	-0.0232583	-0.121168	0.0627554	0.00588805	0.0768276	0.105669	-0.261218	-0.141977	-0.0579557	0.658624	-0.251684	-0.248506	-0.173474	0.0244338	-0.0683166	-0.152251	-0.0449821	0.772706	-0.31322	-0.127589	-0.223626
G97	0.0408028	0.0633972	-0.218772	0.0706893	0.0167935	-0.206365	-0.217466	-0.0740632	-0.265267	-0.0531231	-0.0739765	-0.135556	-0.0698186	-0.162961	0.450615	0.0904757	-0.19165	0.00950142	0.206452	0.409214	-0.132051	0.446218	-0.180766	-0.24215	-0.0989867	-0.165508	0.159152	-0.0519912	-0.1531	-0.157258	0.134316	-0.18808	-0.00218761	-0.150706	-0.193957	0.0198626	0.0194927	0.508103	-0.567049	-0.126348	-0.0175553	-0.169817	-0.0313993	-0.14559	0.287687	0.657187	-0.571968	-0.0467888	-0.329263
G98	-0.0627007	-0.166835	-0.0912593	0.0337066	-0.0550821	-0.336446	-0.159152	0.0550168	-0.228284	-0.00769474	-0.180659	-0.216182	0.0209728	-0.0570629	0.312633	-0.146439	-0.202316	-0.00536564	0.116814	0.352053	-0.080724	0.0711681	-0.0726483	-0.219991	0.0192096	-0.158411	0.0930443	0.0367976	-0.15088	-0.066597	0.075152	-0.0611552	0.131355	-0.115617	-0.106975	-0.0632013	-0.132825	0.682415	-0.408909	-0.0850557	0.0687084	-0.171058	-0.175172	-0.270186	0.0760005	0.504098	-0.384987	-0.0934796	-0.190823
G99	-0.0433931	-0.0521653	-0.0831401	-0.188603	0.0119394	-0.118294	-0.0734319	-0.0517082	-0.0997921	0.0216476	-0.0797667	-0.130179	0.238189	-0.0188614	0.431852	0.338296	-0.0179254	-0.241562	0.0799621	0.411696	-0.110763	0.317421	-0.190105	0.105125	-0.143283	-0.0164452	-0.0825524	-0.130571	-0.111568	-0.213831	0.135785	0.09718	-0.0406722	-0.0280907	-0.166748	-0.123127	0.0391487	0.247004	-0.135969	-0.0788302	-0.22922	-0.00271003	0.0909328	0.0231277	0.0189267	0.534093	-0.30952	-0.222843	-0.166639
G100	0.330743	0.21714	0.26838	0.422971	0.359933	-0.0837061	0.339406	0.211415	0.0104374	0.184576	0.225391	-0.077633	0.047703	0.115835	0.0185131	-0.067816	-0.215572	0.424995	-0.410019	-0.424516	0.354839	-0.294914	0.335184	0.195046	0.217357	0.328414	0.343825	0.201641	0.439601	0.137515	-0.234348	-0.128111	-0.00338481	-0.106649	0.430655	0.364613	0.0562034	0.0616123	0.0233889	0.349463	0.110371	0.218816	0.130027	0.0753475	-0.124367	-0.0511422	-0.189952	0.515395	0.106584
G101	0.461194	0.0360575	0.443084	0.398418	0.426258	0.0898662	0.498678	0.334966	0.161611	0.442845	0.353046	-0.1834	-0.0146385	0.230962	-0.0436108	-0.144567	0.00553977	0.344413	-0.317378	-0.35238	0.560431	-0.279024	0.304535	0.4551	0.0525136	0.3812	0.293608	0.415505	0.271754	0.278676	-0.153199	0.0157051	0.00601865	-0.0657046	0.374495	0.437185	0.29768	-0.230004	0.17478	0.290038	0.00410313	0.367965	0.467311	0.288427	-0.0254133	-0.163353	0.00253589	0.392366	0.20273
G102	-0.25397	0.166074	-0.112199	-0.283552	-0.116292	0.286969	-0.161154	-0.120667	0.174214	-0.146483	-0.0874941	0.0339243	0.0935449	-0.139779	0.0733449	0.329306	0.165573	-0.257823	0.274388	0.0885167	-0.194502	0.441038	-0.140519	0.139104	-0.0977025	-0.0226271	-0.157062	-0.18906	0.0433278	-0.0750427	-0.142381	-0.0341202	-0.166291	0.0919559	-0.22404	-0.117445	-0.125957	-0.310565	0.142282	0.0494444	-0.306843	0.0717123	-0.0312905	0.0846639	0.156344	0.0890826	-0.000663902	-0.164528	-0.0631578
G103	0.380264	0.0721477	0.42628	0.364047	0.537315	-0.169992	0.341148	0.520576	0.207671	0.29474	0.603948	-0.208433	-0.0298538	0.120471	-0.0326183	-0.155843	-0.155952	0.374016	-0.454359	-0.436728	0.222037	-0.0863835	0.489884	0.457211	0.0510987	0.493715	0.426476	0.517245	0.338819	0.210914	-0.135382	-0.0123312	-0.00580098	-0.0439808	0.270535	0.556448	0.275837	-0.152208	-0.0301368	0.588185	0.127828	0.309085	0.351117	0.466636	-0.0462446	-0.252207	-0.0959175	0.264244	0.0935449
G104	-0.371535	-0.150967	-0.214049	-0.239603	-0.255733	-0.0758046	-0.362219	-0.285794	-0.07661	-0.154755	-0.272147	-0.274583	-0.00560508	-0.286512	0.421839	0.288101	-0.139909	-0.39759	0.492343	0.583657	-0.388644	0.575342	-0.309672	-0.00408137	-0.15519	-0.255254	-0.241998	-0.281788	-0.251989	-0.443084	-0.0883865	-0.0155092	-0.171385	0.0980943	-0.311958	-0.314657	-0.23856	0.223604	-0.186469	-0.235011	-0.426519	-0.0296144	-0.118577	-0.205516	-0.0113299	0.448852	-0.383768	-0.354709	-0.317356
G105	0.741231	0.204819	0.394216	0.763564	0.658471	-0.194458	0.626865	0.393019	-0.0554304	0.398505	0.38943	-0.0863835	-0.223757	0.329263	-0.175978	-0.331701	-0.180527	0.783873	-0.594911	-0.456449	0.553988	-0.347939	0.498155	0.206517	0.225085	0.413785	0.681262	0.659995	0.40769	0.395348	0.169035	-0.0334019	0.202926	-0.219273	0.561563	0.717591	0.387133	0.0340985	-0.329481	0.358431	0.541429	0.0121788	0.397133	0.308062	0.202251	-0.188581	-0.296895	0.682981	0.0594573
G106	0.0443073	0.0017305	-0.105212	0.113745	0.0134848	-0.188929	-0.0464623	-0.0886037	-0.407669	0.160109	-0.0596862	-0.0687737	0.11997	0.118795	0.294871	-0.110719	-0.0346209	0.129962	-0.00164343	0.314744	0.0153786	-0.0805716	-0.150031	-0.231811	0.073149	-0.116771	0.0858611	-0.00377662	-0.0951339	-0.00773827	0.366552	0.176914	0.335053	0.07698	0.0222353	-0.06183	-0.0685129	0.61448	-0.365636	-0.292781	0.220035	-0.176739	-0.155843	-0.215289	-0.0789391	0.421055	-0.32787	-0.0372112	-0.309455
G107	-0.0312905	0.122212	0.0295273	-0.0431536	-0.0754998	-0.23464	0.136709	0.000990412	0.0142685	0.0483343	0.00165432	-0.0613729	0.0170329	0.326063	-0.0936973	0.0160098	0.320338	-0.0928919	-0.149661	-0.0182954	-0.0615688	-0.12994	0.134032	0.0604804	0.0996398	0.0390832	0.00678051	0.0492703	-0.0159445	0.0774371	0.387906	0.433572	0.484594	0.297613	-0.0215823	-0.0478336	-0.0235959	0.0503586	-0.0642897	-0.00882663	0.202904	0.0505328	-0.0678813	0.0530795	0.035361	-0.0972453	0.125804	-0.0790914	-0.0799839
G108	-0.27134	-0.09644	-0.230352	-0.342497	-0.220513	0.282507	-0.110567	-0.286142	0.151968	-0.155647	-0.132095	0.0725612	0.423319	-0.182856	0.407603	0.14041	0.0544291	-0.196287	0.274213	0.13179	-0.193021	-0.108194	-0.303665	-0.191694	-0.154515	-0.257823	-0.129635	-0.289211	0.0362969	0.018709	-0.0731494	-0.160893	-0.27861	0.0588696	-0.346132	-0.33982	-0.118088	0.177588	0.282659	-0.169164	-0.343738	0.0558004	-0.22121	-0.180288	-0.315462	0.312894	0.166117	-0.0651168	-0.0397797
G109	0.390494	0.0286349	0.347809	0.294892	0.398505	-0.171864	0.286468	0.493345	0.151859	0.23919	0.317913	-0.174302	-0.144546	0.203491	-0.258955	-0.0161187	-0.0304198	0.252686	-0.507058	-0.3982	0.274845	-0.205625	0.552748	0.276673	-0.102861	0.455012	0.303882	0.481264	0.167053	0.315179	0.0898558	0.00155636	0.144676	-0.0870583	0.304992	0.472775	0.287014	-0.170057	-0.193261	0.369728	0.219817	-0.0618082	0.210958	0.328283	0.0740197	-0.286381	-0.0283519	0.245067	0.0723218
G110	0.359519	0.0523394	0.241497	0.512696	0.407037	-0.0465929	0.348375	0.311087	0.0416952	0.248724	0.271222	-0.0148997	-0.116923	0.088669	-0.134467	-0.204253	-0.0507504	0.441038	-0.422927	-0.507689	0.422884	-0.328762	0.48873	0.285728	0.0102415	0.484942	0.423863	0.421861	0.256691	0.432157	-0.0968976	-0.0843591	-0.0510552	-0.268249	0.481351	0.519444	0.30716	-0.160697	-0.023759	0.340517	0.376324	0.142434	0.29215	0.236578	0.034142	-0.359128	-0.120406	0.422536	0.201293
G111	-0.26467	-0.0652043	-0.233064	-0.299998	-0.192457	0.145918	-0.314006	-0.00901171	0.0163038	-0.178787	-0.214508	-0.0144753	-0.123062	-0.213745	-0.00551804	0.124695	-0.0858071	-0.353786	0.311013	0.492542	-0.302121	0.487666	-0.400977	-0.057183	-0.175881	-0.34042	-0.28549	-0.161307	-0.183271	-0.279961	-0.123106	-0.0892355	-0.0586196	0.051567	-0.137777	-0.216281	-0.112952	0.0352632	-0.277012	-0.323801	-0.172681	-0.264659	-0.0921305	-0.113669	0.171669	0.197147	-0.193675	-0.363886	-0.189311
G112	0.371121	0.117968	0.354426	0.260718	0.336794	0.0159445	0.39833	0.345305	0.389667	0.268031	0.272571	-0.000272091	0.0570194	0.215268	-0.0472894	-0.136122	-0.0784819	0.237274	-0.317443	-0.285424	0.325279	-0.207344	0.155168	0.393825	0.126261	0.211807	0.272058	0.187536	0.447786	0.122539	-0.17871	0.0395403	-0.0764576	-0.0976807	0.263177	0.38588	0.260284	-0.238537	0.236055	0.222146	-0.0445685	0.375758	0.253948	0.235337	-0.0183389	-0.202577	-0.0689043	0.228176	0.232551
G113	0.45129	0.120645	0.342301	0.521925	0.532373	0.0174682	0.484464	0.162134	0.0726701	0.168316	0.380614	-0.103863	0.054255	0.18869	0.0947856	-0.178133	-0.177697	0.620139	-0.352772	-0.380699	0.581807	-0.236382	0.346611	0.349789	0.210022	0.353294	0.414852	0.404948	0.455165	0.235489	-0.0940134	-0.0415211	-0.0778289	-0.100793	0.354056	0.501899	0.24632	0.0087178	0.011134	0.275236	0.153361	0.333399	0.431721	0.259281	0.0720824	0.0552127	-0.289538	0.530501	0.0801145
G114	0.604488	0.128677	0.545325	0.575799	0.635115	-0.152817	0.593365	0.483789	0.161611	0.204493	0.497483	-0.258759	-0.175259	0.144459	-0.0610681	-0.436227	-0.208454	0.536553	-0.516179	-0.560105	0.592277	-0.313351	0.723207	0.28144	0.0305069	0.516113	0.574319	0.552269	0.35251	0.443432	-0.105049	-0.221254	0.0330754	-0.203013	0.349441	0.783089	0.45003	-0.0544726	-0.216421	0.557384	0.346415	0.277108	0.421491	0.485225	0.0658352	-0.132269	-0.134119	0.56337	0.252294
G115	0.0477465	0.429305	0.279895	0.0263928	0.141433	0.307126	0.10051	-0.00530033	0.18377	0.110567	0.0737697	0.22158	-0.0301586	0.314418	0.00671521	-0.123606	0.528042	-0.00127339	-0.07661	-0.430459	0.302837	-0.260478	0.140453	0.106018	0.231441	-0.0121788	0.00708525	0.157432	0.0844244	0.316507	0.0884954	0.41335	0.331483	0.248484	0.261806	0.0609593	-0.00789068	-0.339232	0.330895	0.0138984	0.0194273	0.145373	0.202251	0.18808	-0.175063	-0.290604	0.438905	0.0755651	0.030398
G116	0.479852	0.197191	0.245863	0.543478	0.459412	0.0064758	0.433269	0.366846	0.0477795	0.359532	0.324282	-0.0631581	-0.086471	0.268512	0.0491943	-0.102024	-0.0647471	0.538504	-0.350357	-0.267489	0.491312	-0.0693618	0.296167	0.349857	0.262145	0.264256	0.482409	0.466758	0.283292	0.124346	-0.0423596	-0.0498038	0.0579231	-0.0714515	0.493554	0.464201	0.248471	-0.00111014	-0.184958	0.340312	0.18881	0.167446	0.360305	0.196571	0.191107	-0.0119612	-0.344654	0.522429	-0.0288418
G117	-0.0446774	0.231528	0.0436108	-0.0428924	-0.0191879	0.0992915	0.0157704	0.049575	0.0776548	0.250073	0.0618303	0.138211	0.116575	0.46681	0.209042	0.0888214	0.752245	-0.135382	-0.0740632	-0.0637455	0.0394314	-0.200531	0.00627986	0.132487	0.172778	-0.11257	0.003929	0.0811158	0.00355895	0.132378	0.43155	0.788944	0.737225	0.591058	0.0316823	-0.0730619	0.0788198	0.0294838	0.0419782	-0.0465493	0.212851	0.0184478	0.104516	0.0684255	-0.0919777	0.0137025	0.326738	-0.121538	-0.238733
G118	0.581059	0.128384	0.343871	0.541508	0.491747	-0.275739	0.428252	0.519849	-0.0792878	0.132455	0.449184	-0.0671851	-0.387819	0.0615256	-0.290638	-0.279287	-0.304352	0.535293	-0.457377	-0.460968	0.469806	-0.27994	0.567433	0.121821	0.0489549	0.434379	0.444937	0.401663	0.177481	0.3701	-0.0677841	-0.230125	0.0437743	-0.281627	0.370851	0.691768	0.302852	-0.10198	-0.296722	0.324247	0.467379	-0.0219089	0.293359	0.271385	0.268403	-0.164235	-0.153602	0.457464	0.26787
G119	0.247636	-0.0213428	0.304318	0.151511	0.298832	0.0412817	0.305428	0.43331	0.0741503	0.210675	0.210741	-0.0976372	-0.0480731	0.0565623	-0.0559093	-0.106083	-0.0892132	0.140192	-0.182921	-0.183379	0.213004	-0.0537108	0.273626	0.268706	-0.0952863	0.313264	0.298353	0.310717	0.122017	0.328457	-0.0423485	-0.124629	-0.0243032	-0.195655	0.19313	0.357669	0.307312	-0.165595	0.0315734	0.269642	0.100793	0.121342	0.196308	0.258606	0.0759134	-0.188973	0.131355	0.0994221	0.302141
G120	-0.292217	-0.0535043	-0.333411	-0.347571	-0.317586	0.0852303	-0.266487	-0.254537	-0.124553	-0.261165	-0.182782	-0.00199172	0.33069	-0.0455156	0.482213	-0.0138876	0.294208	-0.399127	0.353035	0.45976	-0.204461	0.166553	-0.419153	-0.103188	-0.0558443	-0.414332	-0.214507	-0.302295	-0.186187	-0.241248	0.21096	0.196788	0.17243	0.36689	-0.357541	-0.36689	-0.0132455	0.439114	-0.114649	-0.352338	-0.121571	-0.15198	-0.140193	-0.251642	-0.142653	0.572711	-0.08264	-0.411894	-0.32256
G121	0.598502	0.261218	0.29178	0.674296	0.562695	-0.0927831	0.485487	0.21875	-0.121538	0.504664	0.25654	-0.103144	-0.10728	0.390124	-0.0367541	-0.304405	-0.106866	0.626299	-0.465287	-0.278676	0.497959	-0.202926	0.395958	0.319794	0.0994874	0.267357	0.5529	0.506906	0.363982	0.25508	0.104843	0.0748033	0.187449	-0.112047	0.498046	0.514916	0.346983	0.0851427	-0.175259	0.261893	0.302794	0.132595	0.462544	0.279895	0.135773	-0.138516	-0.304753	0.550897	-0.0159881
G122	0.298475	0.200445	0.167576	0.373278	0.424486	0.0251958	0.254875	0.101991	0.00996947	0.0936107	0.0927296	-0.00699822	-0.0961031	0.349225	0.00482148	-0.265595	-0.00637785	0.28462	-0.260099	-0.131486	0.285001	-0.169742	0.0526336	0.234108	0.131083	0.121789	0.238429	0.258684	0.309358	0.161373	0.308783	0.154342	0.187156	-0.082074	0.141934	0.289713	0.134523	0.0167391	-0.209892	0.232998	0.29657	0.0514473	0.154364	0.185817	0.146168	-0.0436545	-0.166325	0.223432	-0.0326838
G123	0.296307	-0.0176206	0.323146	0.393585	0.328588	0.0101544	0.293739	0.234249	0.0969841	0.145264	0.183499	-0.100053	-0.11024	0.049292	-0.0364711	-0.325345	-0.0891479	0.428696	-0.257257	-0.438273	0.438535	-0.332615	0.325737	0.226826	0.0346209	0.187993	0.393955	0.20273	0.328566	0.234793	-0.0857309	-0.0518388	-0.0385172	-0.14263	0.309259	0.411891	0.184468	-0.0901057	-0.0517953	0.217444	0.162504	0.277522	0.198376	0.125064	0.0317258	-0.143588	-0.0389743	0.414547	0.283356
G124	0.322667	0.00233998	0.390211	0.341365	0.466571	0.0783078	0.496131	0.433441	0.237492	0.220644	0.444958	-0.128873	0.125282	0.190475	0.0798315	-0.354295	0.0769582	0.351944	-0.452596	-0.447002	0.561825	-0.410128	0.454947	0.358649	0.075391	0.328936	0.346568	0.41779	0.491712	0.36803	-0.136797	0.021234	0.120602	0.0248038	0.287208	0.518616	0.32157	0.0482472	0.0101544	0.425714	0.068186	0.326956	0.363024	0.361718	-0.153078	-0.083532	-0.0402151	0.313373	0.112678
G125	-0.325889	-0.10149	-0.28686	-0.314548	-0.386554	-0.0145514	-0.284553	-0.177567	-0.153993	-0.385792	-0.266259	0.0105245	-0.096157	-0.230505	0.245219	0.248898	0.0128971	-0.347156	0.446131	0.445631	-0.19461	0.375954	-0.298854	-0.166139	-0.0231495	-0.243717	-0.310978	-0.228328	-0.279677	-0.0785255	-0.209	-0.20064	-0.194785	-0.115334	-0.282616	-0.331135	-0.155702	0.028156	-0.14718	-0.293434	-0.152273	-0.129243	-0.185969	-0.282616	0.0753039	0.387621	-0.0697533	-0.325279	-0.136035
G126	0.299028	0.148159	0.453881	0.36753	0.402118	0.126675	0.503401	0.141868	0.267248	0.265441	0.284924	-0.135556	0.0599145	0.333682	0.122321	-0.263743	0.114093	0.386489	-0.336272	-0.498221	0.453619	-0.368683	0.394391	0.228241	0.304296	0.257126	0.488142	0.41631	0.369511	0.377543	0.0468652	0.0937626	0.128743	0.0607198	0.327173	0.426715	0.192609	0.0357092	0.0723218	0.296024	0.0800057	0.367573	0.195895	0.176457	-0.0732143	-0.023193	0.0122876	0.47247	0.14017
G127	0.332223	0.168141	0.290234	0.237274	0.526997	0.206691	0.497524	0.175042	0.239886	0.287513	0.363527	0.0885602	0.311174	0.343085	0.238885	-0.0501627	-0.0350562	0.286251	-0.321797	-0.202142	0.328283	-0.147441	0.0948945	0.457951	0.0453521	0.229939	0.370425	0.106496	0.518616	0.0135284	-0.110665	0.134707	-0.0253698	0.136231	0.282093	0.333682	0.416498	-0.0874065	0.208476	0.171755	-0.106301	0.437512	0.49132	0.403859	-0.138081	0.134424	-0.0964617	0.368683	0.0717776
G128	0.391234	0.1191	0.268445	0.360368	0.461782	0.0813552	0.537032	0.377086	0.120362	0.369053	0.352251	-0.043023	-0.0633102	0.243217	0.029745	0.0370153	0.0808981	0.240322	-0.437947	-0.292498	0.409541	-0.0559528	0.312284	0.480393	-0.0660528	0.436314	0.373973	0.36248	0.311	0.138864	-0.0286677	0.0129842	0.0787214	-0.0656175	0.368357	0.499635	0.428524	-0.232725	-0.105604	0.289538	0.0545815	0.225868	0.403468	0.462479	0.0219305	-0.0569323	-0.102861	0.334291	0.0418476
G129	0.527585	0.194393	0.267661	0.461477	0.548982	-0.0157051	0.477803	0.370751	0.133466	0.200183	0.400858	0.0438067	-0.014312	0.20323	-0.0223441	-0.177088	-0.160414	0.485508	-0.446501	-0.459083	0.373516	-0.217314	0.349789	0.225564	0.0962005	0.34056	0.461608	0.331178	0.440015	0.324169	-0.138212	-0.0833361	0.0956781	-0.0638979	0.294348	0.589273	0.334315	-0.137667	-0.186796	0.36174	0.453075	0.189277	0.353686	0.313765	-0.00122985	-0.104842	-0.0846421	0.477977	0.0509246
G130	-0.137689	0.0364276	0.0128318	-0.0974413	-0.0350562	0.074738	-0.0713205	-0.180135	0.0757828	-0.104341	-0.145918	0.0504675	0.165878	-0.0641808	0.00353718	0.176761	-0.0541897	-0.110415	0.0104809	0.00813008	-0.0780684	0.0852733	-0.148703	0.0226271	-0.0286349	-0.0995309	-0.0645727	-0.0796792	0.0744332	-0.0805716	-0.0504351	0.0332278	-0.124324	-0.0293097	-0.0295056	-0.0960046	-0.208771	-0.12415	0.221254	0.0921518	-0.20175	0.0946768	-0.124542	-0.100968	0.0179254	-0.148007	-0.0906934	-0.0360357	0.0582384
G131	0.520097	0.215616	0.212198	0.560736	0.433485	-0.0507504	0.47149	0.303947	-0.0382778	0.242934	0.333226	0.0553433	-0.151446	0.145068	-0.0632013	-0.238406	-0.0840761	0.580414	-0.449005	-0.380786	0.478173	-0.336228	0.313786	0.204471	0.162525	0.228045	0.410215	0.27737	0.39672	0.217749	-0.0480624	-0.0559963	0.0166411	-0.191389	0.468203	0.488316	0.346396	-0.0191879	-0.0900621	0.201532	0.278785	0.0720388	0.40682	0.246569	-0.0477465	-0.0500756	-0.184946	0.512565	-0.00268826
G132	-0.110893	-0.0171635	-0.0679466	-0.00577921	-0.192673	0.0809634	0.0298538	-0.0577813	-0.28649	-0.0383431	0.013659	0.0497274	0.0936102	-0.0481384	-0.05715	-0.156561	0.199856	-0.0658787	0.158694	-0.0499886	0.00120808	0.07156	0.0752604	0.0554957	0.225324	0.0797662	-0.0336631	-0.0123747	-0.164811	0.220731	-0.0882995	-0.0140726	0.03732	0.0823565	0.050794	-0.0458093	-0.0227143	0.0354045	0.112635	-0.10038	0.000272091	-0.0135284	-0.0462664	-0.163679	-0.0549515	-0.0770453	-0.00947965	-0.0666188	-0.125565
G133	0.438861	0.00791241	0.325802	0.46779	0.383942	-0.251053	0.551899	0.400594	0.171929	0.310565	0.332203	-0.227675	-0.258715	0.053036	-0.157149	-0.0790261	-0.228502	0.412675	-0.394195	-0.19731	0.398526	-0.154907	0.412218	0.290539	-0.00601865	0.414199	0.420598	0.411456	0.220013	0.0942415	-0.0123204	9.79528e-05	0.0504239	-0.109391	0.407625	0.55499	0.324487	-0.0772412	-0.265681	0.27306	0.242868	0.146875	0.37911	0.245546	0.0789391	-0.17465	-0.348788	0.382136	0.0622871
G134	0.383137	-0.0853386	0.356363	0.461651	0.51792	-0.111764	0.535399	0.409236	0.180396	0.283486	0.412917	-0.279024	0.071277	0.0631142	0.0855781	-0.406276	-0.109936	0.479087	-0.444891	-0.55216	0.454164	-0.400921	0.455927	0.35127	0.00175227	0.457102	0.511956	0.367769	0.439688	0.235489	-0.18203	-0.091107	-0.068839	-0.0317911	0.36766	0.536226	0.243838	0.0288743	0.0774371	0.548568	0.0963311	0.326825	0.314526	0.24966	-0.119687	-0.0985732	-0.0732796	0.368901	0.249986
G135	-0.315658	-0.410324	-0.15371	-0.225411	-0.237579	-0.205298	-0.281201	-0.0997704	-0.053036	-0.199639	-0.201555	-0.230853	-0.0759569	-0.219186	0.00932728	0.197723	-0.0420435	-0.216487	0.274605	0.25336	-0.289668	0.219186	0.0005986	-0.0701015	-0.00802124	0.0520129	-0.209826	-0.130419	-0.26013	-0.112069	-0.0724637	-0.110066	-0.185621	-0.0313558	-0.214484	-0.244849	-0.0957766	0.0362752	-0.0217564	-0.0039943	-0.194697	0.0126577	-0.161263	-0.0972018	0.123344	0.0126577	-0.0647468	-0.238667	-0.0803104
G136	0.299942	0.128873	0.377303	0.328153	0.39032	-0.211001	0.479631	0.403511	0.125042	0.226978	0.487938	-0.172734	0.00486499	0.116139	-0.0975283	-0.114964	-0.2738	0.360412	-0.413263	-0.463632	0.303251	-0.325345	0.544062	0.15765	-0.00368955	0.372123	0.392671	0.355318	0.215224	0.284683	0.0177078	-0.106083	0.0761964	-0.129809	0.222864	0.481003	0.230658	0.052383	-0.18192	0.417333	0.171406	0.21616	0.18488	0.337513	-0.0316605	-0.123845	-0.149334	0.373037	0.014682
G137	0.464873	0.0374724	0.189865	0.420424	0.427847	-0.048639	0.339232	0.275998	0.0626571	0.235729	0.281844	0.0154004	0.11048	0.269642	0.0840979	-0.385205	0.00449494	0.453881	-0.471251	-0.399114	0.37406	-0.47297	0.24474	0.224519	0.134772	0.117467	0.456253	0.416288	0.372297	0.178437	-0.0434586	0.0162275	0.159913	0.00336305	0.34524	0.376846	0.168229	0.075674	0.0524918	0.303599	0.222146	0.173692	0.168033	0.135817	-0.176979	-0.0923912	0.042087	0.401726	0.309172
G138	0.544672	0.120362	0.349093	0.638794	0.562369	-0.0254133	0.588707	0.472013	0.191998	0.41705	0.465463	-0.00257942	-0.123714	0.343107	-0.0654216	-0.374169	-0.0316823	0.587575	-0.48233	-0.36039	0.626582	-0.368052	0.464677	0.392497	0.208019	0.342759	0.506536	0.472122	0.439405	0.346611	-0.0430342	0.0992044	0.176021	-0.0902581	0.486858	0.622033	0.45976	-0.0599145	-0.074738	0.3679	0.280678	0.429675	0.457733	0.377456	0.00969733	-0.195786	-0.127785	0.481939	0.125499
G139	0.310782	-0.0311599	0.335706	0.350225	0.436162	0.0638543	0.287339	0.117162	0.064355	0.256625	0.192663	-0.10863	-0.0191226	0.259869	0.141215	-0.0768276	-0.186469	0.367508	-0.201859	-0.174519	0.353577	-0.127981	0.116488	0.360499	-0.0343161	0.245872	0.237144	0.118773	0.492648	0.0360357	-0.127688	0.00456025	-0.062853	-0.0720606	0.265289	0.278872	0.17439	-0.0636802	0.00229645	0.205734	0.0265234	0.344565	0.313525	0.236121	0.0177295	0.024412	-0.184772	0.32615	0.177588
G140	-0.254884	-0.0767188	-0.283922	-0.322254	-0.409366	-0.0772194	-0.35867	-0.378	-0.136035	-0.170971	-0.323768	0.0581078	0.00288417	-0.117402	0.114159	0.313612	-0.238276	-0.341365	0.425975	0.624514	-0.469923	0.557057	-0.433942	-0.152861	-0.0871453	-0.252773	-0.246286	-0.342867	-0.265855	-0.364373	0.106377	-0.106322	-0.253339	-0.240997	-0.442344	-0.392214	-0.189518	0.101229	-0.0310946	-0.359389	-0.253905	-0.0544944	-0.311675	-0.245285	0.261284	0.287143	-0.205298	-0.331614	0.0359051
G141	0.286077	0.162221	0.251423	0.271188	0.406123	0.309237	0.487859	0.168468	0.229416	0.355536	0.186079	-0.0237372	0.102208	0.35127	0.267204	-0.00177403	-0.0260446	0.401574	-0.243282	-0.162721	0.33773	-0.109544	0.124498	0.30952	-0.0283737	0.225368	0.354012	0.289429	0.474472	0.181354	-0.0224422	0.0785908	-0.0425659	-0.0434584	0.1999	0.407233	0.337514	-0.0734972	-0.0458746	0.214615	0.00273179	0.459975	0.315136	0.348853	-0.088582	0.070711	-0.157519	0.380895	-0.0322918
G142	-0.170427	0.0633537	0.220796	-0.195786	3.26509e-05	0.330547	0.130963	-0.0244991	0.247331	-0.105169	0.0607964	0.0150085	0.198463	-0.0198409	-0.0808764	-0.24326	0.201902	-0.103906	0.0226271	-0.407603	0.0355351	-0.325628	0.142042	0.0646597	0.0787867	0.150118	-0.00926198	-0.0742809	0.0843373	0.318357	-0.233771	-0.0691438	-0.145982	0.044808	-0.0051915	-0.0388873	-0.0710597	-0.216965	0.605903	0.0906934	-0.291845	0.275389	-0.028439	0.219839	-0.354992	-0.347809	0.401639	0.0356657	0.195459
G143	-0.12637	-0.131899	-0.114224	-0.0649862	-0.198572	-0.130919	-0.254841	-0.181115	-0.115095	-0.0844897	-0.237765	-0.115486	-0.116509	0.109326	-0.106627	0.0975283	0.0785037	-0.207954	0.112548	0.18007	-0.281353	0.239059	-0.0770018	-0.100663	0.177088	-0.205363	-0.0555392	0.0894091	-0.370229	-0.217793	0.289692	0.125434	0.122017	0.0148126	-0.192826	-0.162177	-0.155398	0.137428	-0.15815	0.0249997	-0.00734646	-0.266551	-0.229112	-0.199007	0.439797	-0.0017958	-0.0540155	-0.145003	-0.0375159
G144	0.519683	0.251053	0.488491	0.530088	0.579543	0.0775677	0.612847	0.337447	0.0322265	0.344587	0.478785	-0.0423483	-0.0952863	0.288123	-0.0621347	-0.346568	0.0773283	0.604532	-0.516549	-0.64996	0.655554	-0.295371	0.62458	0.403816	0.222581	0.535834	0.544302	0.460498	0.404229	0.560671	-0.0564102	0.00358072	0.0940673	-0.155342	0.47358	0.688793	0.312808	-0.195002	0.0485302	0.497959	0.241018	0.388883	0.406515	0.418226	-0.0518388	-0.236991	-0.0499886	0.558146	0.112526
G145	0.218402	0.0965923	0.372558	0.189909	0.295524	0.116139	0.375497	0.254187	0.215703	0.292716	0.325314	0.222734	0.126392	0.200509	0.0849686	-0.203013	0.364504	0.207714	-0.293673	-0.458343	0.312415	-0.410977	0.434138	0.115269	0.184293	0.271101	0.31666	0.264266	0.194502	0.467485	-1.08837e-05	0.209499	0.204776	0.163984	0.286534	0.327804	0.352719	-0.18364	0.259629	0.335532	0.167423	0.262045	0.181877	0.227762	-0.297613	-0.192434	0.241845	0.245676	0.0947639
G146	-0.148616	-0.0469194	-0.295306	-0.0449821	-0.295393	-0.144894	-0.355101	-0.26124	-0.288449	-0.201054	-0.339898	-0.0697315	-0.45116	-0.28834	0.0294838	0.154515	-0.25249	-0.145482	0.411565	0.57643	-0.251837	0.573426	-0.266987	-0.297461	-0.0654433	-0.388143	-0.212568	-0.100685	-0.3684	-0.247374	0.0615473	-0.263134	-0.216182	-0.308715	-0.223169	-0.221667	-0.194416	0.149095	-0.388971	-0.248833	-0.026284	-0.344456	-0.215681	-0.251445	0.359802	0.240017	-0.430981	-0.174911	-0.164506
G147	0.414939	0.181311	0.55549	0.421208	0.484398	0.0256092	0.561237	0.220165	0.185904	0.284945	0.361589	-0.0919777	0.0800274	0.1324	0.161698	-0.246264	0.126348	0.425779	-0.400812	-0.584245	0.569356	-0.428065	0.498656	0.295132	0.0441985	0.403337	0.492931	0.488774	0.421752	0.453271	-0.000130604	0.0673806	0.125303	-0.0122876	0.314004	0.455078	0.344611	-0.0288525	0.116879	0.405274	0.116836	0.196678	0.367421	0.273386	-0.263939	-0.0965488	0.0665317	0.500158	0.0838149
G148	0.581567	-0.10506	0.382985	0.609734	0.547893	-0.146701	0.511564	0.412087	0.0129189	0.247897	0.369306	-0.223517	-0.092696	0.168707	-0.0628313	-0.376955	-0.276651	0.596043	-0.455252	-0.466527	0.479762	-0.237536	0.526692	0.25286	0.185011	0.419292	0.554337	0.525734	0.336272	0.379502	-0.0760335	-0.275302	-0.0444597	-0.250705	0.288493	0.64097	0.271407	0.14829	-0.267683	0.510911	0.328762	0.136992	0.320687	0.218837	0.171124	-0.0643985	-0.268423	0.530741	0.237057
G149	-0.237993	-0.206387	-0.181245	-0.134554	-0.132639	-0.169164	-0.288536	-0.143631	-0.221798	0.0796138	-0.312068	-0.0180777	0.00791241	-0.108651	-0.0662487	0.114746	-0.164441	-0.125804	0.220165	0.332289	-0.24794	0.2031	-0.232442	0.0328577	0.0158792	-0.0974195	-0.224954	-0.272994	-0.197179	-0.353011	-0.143893	0.0599145	-0.0916729	-0.0372329	0.0507722	-0.372754	-0.345775	0.152491	0.0595444	-0.145046	-0.210762	-0.0175553	-0.204972	-0.284531	0.0497056	0.0164887	-0.161067	-0.237296	-0.116444
G150	0.342062	-0.12994	0.344652	0.321035	0.418313	-0.105386	0.515417	0.439188	0.267291	0.254971	0.407246	-0.194719	0.0744768	0.147354	0.0663576	-0.136339	-0.0405416	0.37911	-0.448395	-0.334792	0.374169	-0.250291	0.507341	0.416571	0.0336849	0.498242	0.380982	0.338514	0.390821	0.29043	-0.200162	-0.0438502	0.0760658	0.034142	0.299833	0.504598	0.440714	-0.12206	-0.0169241	0.368335	0.128394	0.348919	0.26653	0.238406	-0.203557	-0.0575636	-0.0994221	0.324583	0.129962
G151	0.449919	0.161851	0.263112	0.379066	0.517354	0.134489	0.421295	0.341648	0.317313	0.112657	0.380875	0.047703	0.108477	0.100119	0.170231	-0.17108	0.0336196	0.361326	-0.442257	-0.509452	0.438426	-0.390538	0.338775	0.355579	0.140671	0.378413	0.328479	0.262568	0.586835	0.211458	-0.229004	-0.0855128	-0.145547	-0.0666623	0.343259	0.453968	0.379634	-0.134272	0.117772	0.487272	0.020668	0.391321	0.303207	0.340734	-0.17071	-0.0865576	-0.0196014	0.396872	0.138298
G152	-0.241824	0.0852516	-0.112504	-0.145329	-0.333399	-0.0411728	-0.262024	-0.209369	-0.190627	-0.176282	-0.321613	-0.0716906	-0.192151	-0.143958	0.0490743	0.160849	0.113331	-0.250073	0.317813	0.35793	-0.221928	0.333747	-0.17515	-0.275715	-0.0765011	-0.192064	-0.204297	-0.0137896	-0.277304	0.025718	0.220362	0.0537325	0.0699056	-0.0116346	-0.115073	-0.227631	-0.265867	0.104712	-0.283116	-0.227218	-0.0183607	-0.218598	-0.146962	-0.220709	0.147223	0.0304633	-0.0993132	-0.25212	-0.246286
G153	0.569443	0.0251521	0.254688	0.533636	0.528499	-0.0245861	0.559822	0.444608	0.148616	0.444847	0.398496	-0.0330972	-0.00913138	0.190192	0.070058	-0.358888	-0.0412164	0.455796	-0.437359	-0.28858	0.363916	-0.304274	0.257148	0.446676	0.241998	0.30188	0.574036	0.412327	0.485051	0.190845	-0.0785477	0.0581513	0.184772	-0.038822	0.430938	0.567571	0.441389	0.0506851	-0.134337	0.423428	0.309759	0.267836	0.235206	0.170993	0.014965	0.0119611	-0.119209	0.339319	0.153144
G154	0.646848	0.0156616	0.446784	0.676037	0.637988	-0.193696	0.56707	0.551333	0.0499015	0.446959	0.419403	-0.238776	-0.211676	0.276412	-0.17256	-0.337099	-0.198071	0.608537	-0.592974	-0.46102	0.535377	-0.268554	0.573187	0.373189	0.0945244	0.462109	0.56633	0.544258	0.36568	0.402553	-0.00753152	-0.0952428	0.154798	-0.233117	0.499396	0.729933	0.329112	-0.0828354	-0.311457	0.436684	0.399462	0.219295	0.368161	0.350791	0.143022	-0.146004	-0.210588	0.526257	0.130027
G155	-0.272385	0.0440461	-0.29979	-0.290887	-0.112004	0.323059	-0.129548	-0.178394	0.0337066	-0.169252	-0.1085	-0.0683819	0.51139	-0.198289	0.628541	0.0238243	0.110371	-0.200836	0.359759	0.205363	-0.09176	0.146309	-0.31901	-0.0835755	-0.0898662	-0.259368	-0.0394532	-0.276651	0.0525136	-0.0433278	-0.127296	-0.134054	-0.14903	0.212198	-0.37689	-0.239669	-0.0723549	0.443955	0.0106986	-0.109718	-0.34228	0.0507504	-0.0504675	-0.123889	-0.248158	0.647979	-0.0867971	-0.101098	-0.215224
G156	0.299311	0.13819	0.337817	0.294979	0.619638	0.145721	0.453663	0.268837	0.276564	0.307626	0.413711	0.0242379	0.205929	0.174127	0.167924	-0.0987473	0.0099803	0.389602	-0.39537	-0.441843	0.334552	-0.213548	0.40584	0.474973	-0.0551474	0.453663	0.391191	0.260021	0.647435	0.213091	-0.158162	0.107411	-0.0129624	0.0622218	0.371274	0.456928	0.410794	-0.229416	0.156844	0.428761	0.0846421	0.573318	0.321405	0.429915	-0.26629	-0.13573	0.124868	0.364025	0.118534
G157	0.708144	0.109348	0.526736	0.694823	0.717025	-0.0391702	0.709711	0.542125	0.129134	0.414003	0.575008	-0.153405	-0.148137	0.30854	-0.075021	-0.343782	-0.123301	0.641841	-0.59145	-0.632459	0.640557	-0.364199	0.624623	0.441952	0.151424	0.493562	0.640862	0.642211	0.448025	0.441734	-0.0328579	-0.117162	0.102818	-0.136666	0.477476	0.806794	0.46592	-0.0988779	-0.191128	0.514263	0.441669	0.292846	0.468399	0.462631	0.0224094	-0.17909	-0.101729	0.667026	0.251227
G158	0.141302	0.216835	0.0384084	0.211088	0.195481	0.140279	0.0720606	-0.145678	-0.32676	-0.0313558	0.120189	0.164376	0.0280036	0.0157922	0.0231713	-0.154994	-0.00486499	0.275193	-0.0853169	-0.299529	0.246308	-0.210892	0.0293967	-0.0433278	0.0918253	-0.027503	0.224432	0.0694703	0.183683	0.247505	-0.00520241	-0.0975936	-0.0817906	-0.184227	0.239712	0.109304	0.00761859	-0.0893874	0.141324	0.121189	0.202185	0.0614817	0.0509028	0.0600886	-0.0204504	-0.0348168	0.00103395	0.256103	0.176761
G159	-0.176195	-0.0818994	-0.32332	-0.143936	-0.247222	-0.0109381	-0.298223	-0.171842	-0.215311	-0.172908	-0.244981	-0.0823348	-0.226064	-0.247418	0.0488349	0.213657	-0.270927	-0.220383	0.419445	0.404164	-0.322689	0.668528	-0.280657	-0.0734972	0.000489764	-0.23094	-0.220753	-0.214789	-0.300465	-0.307038	-0.134229	-0.339515	-0.339733	-0.19189	-0.254906	-0.196134	-0.108663	0.0324877	-0.272341	-0.0848815	-0.161589	-0.189974	-0.249464	-0.294218	0.327587	0.150227	-0.318227	-0.265724	-0.033489
G160	-0.277783	-0.115356	-0.122038	-0.281505	-0.222233	-0.0103068	-0.153906	-0.213853	-0.0642244	-0.199225	-0.160861	-0.201032	0.182072	-0.172778	0.419619	0.467485	-0.0202109	-0.404621	0.299398	0.348244	-0.271884	0.469226	-0.179722	0.142978	-0.123301	0.0763705	-0.147528	-0.284248	-0.107367	-0.355384	-0.0986063	-0.0162275	-0.196439	0.0842285	-0.327935	-0.224149	-0.0395623	0.0652039	0.0393008	-0.0877766	-0.421317	0.113201	-0.0656175	-0.0771759	0.144067	0.372427	-0.215072	-0.272886	0.046114
G161	0.43762	0.200727	0.288384	0.477324	0.535356	0.191781	0.51755	0.354774	0.0796138	0.193348	0.280484	0.0728225	0.00821715	0.256408	-0.14226	-0.278414	-0.106279	0.617941	-0.470141	-0.468486	0.512587	-0.375671	0.292302	0.237775	0.118338	0.315506	0.423733	0.371056	0.538773	0.382419	-0.0938502	-0.0416952	-0.00887017	-0.139583	0.45769	0.519313	0.317913	-0.0658134	0.0537108	0.315092	0.401138	0.270535	0.394325	0.358649	-0.0277206	-0.211894	-0.0846856	0.483092	0.209935
G162	-0.220557	-0.109196	-0.136688	-0.230243	-0.326651	-0.145525	-0.350072	-0.235533	-0.16468	-0.32184	-0.162788	-0.16738	-0.23451	-0.23094	0.0264799	0.376411	-0.196156	-0.294783	0.440624	0.363133	-0.349681	0.577541	-0.246961	-0.084468	-0.0256092	-0.0490308	-0.230026	-0.306342	-0.290539	-0.306081	-0.124303	-0.253447	-0.239538	-0.096157	-0.391408	-0.257518	-0.14274	-0.0984426	-0.110545	-0.233792	-0.238733	-0.130375	-0.205755	-0.227523	0.381831	0.150053	-0.210566	-0.249333	-0.0194273
G163	0.549504	0.242673	0.425496	0.586378	0.704574	0.0667058	0.618006	0.361805	0.195873	0.32763	0.482649	-0.0670324	0.0504675	0.227523	-0.0397362	-0.163831	-0.171472	0.670073	-0.694953	-0.607035	0.610017	-0.339145	0.590122	0.376411	-0.0390614	0.589795	0.595694	0.518812	0.529478	0.34093	-0.164507	-0.101773	-0.0310293	-0.133031	0.522752	0.746063	0.462459	-0.170841	0.00847836	0.443389	0.225215	0.40436	0.529587	0.518834	-0.0542767	-0.225934	-0.167554	0.714761	0.155233
G164	-0.368096	-0.0549297	-0.282507	-0.455665	-0.301531	0.223409	-0.257278	-0.425779	0.106584	-0.126239	-0.210436	0.190496	0.364178	-0.0601757	0.350878	0.646521	0.279612	-0.347765	0.262764	0.269642	-0.34056	0.314788	-0.387795	-0.0656828	-0.201097	-0.0925872	-0.207627	-0.364744	-0.0852298	-0.198746	-0.0689374	0.0829225	-0.173496	0.186731	-0.357081	-0.432723	-0.0118741	-0.198202	0.267857	-0.28871	-0.349746	0.0390832	-0.177937	-0.107171	-0.103123	0.230048	0.0908893	-0.209369	-0.147767
G165	0.378283	0.0223877	0.365092	0.224432	0.404055	0.17822	0.445565	0.367747	0.177218	0.335554	0.213125	0.0216476	0.0981813	0.338666	-0.196504	-0.298832	-0.13819	0.339428	-0.371861	-0.241171	0.350704	-0.255972	0.162917	0.355732	-0.165225	0.296351	0.336359	0.24757	0.364961	0.167575	-0.108924	0.0316823	-0.0850339	-0.200531	0.382201	0.376716	0.297201	-0.233465	0.20471	0.344152	0.110502	0.323777	0.324888	0.373189	-0.0189702	-0.191324	-0.0460269	0.174911	0.377564
G166	0.00828245	-0.239647	-0.203078	-0.0205592	-0.238123	-0.271971	-0.153361	-0.196874	-0.29696	0.0839455	-0.391149	0.046484	-0.125216	0.184685	-0.36642	-0.0531013	-0.206212	-0.0467017	0.0385825	0.340517	-0.194458	-0.0590873	-0.197397	-0.23488	0.12674	-0.255668	-0.166944	-0.000228557	-0.340081	-0.231419	0.393065	0.0609811	0.130854	-0.208716	-0.0863182	-0.271841	-0.188255	0.277261	-0.242716	-0.239255	0.203274	-0.379393	-0.425561	-0.430154	0.248136	-0.014312	0.0345338	-0.125347	-0.0642679
G167	-0.0194926	-0.181332	-0.0782643	0.0207769	-0.0837714	-0.00271003	0.0571282	-0.242934	-0.0136372	0.0214299	0.0282323	-0.140497	-0.00244882	-0.0899098	0.1329	0.0261099	0.124781	0.0833796	0.216944	-0.136905	0.0672936	-0.157454	0.0575201	-0.0899098	0.113375	-0.0304198	0.069122	0.011134	-0.0229101	0.138668	0.0376467	-0.112047	-0.0917818	0.0367541	-0.187993	-0.0790044	0.0613188	0.0911505	0.0892132	0.0754998	-0.0699056	-0.0393008	-0.0380819	-0.150923	0.03227	0.198724	0.142391	0.136644	0.0847727
G168	-0.227022	0.0291355	-0.324735	-0.270556	-0.204972	0.201728	-0.172887	-0.25915	-0.0672065	-0.15027	-0.122746	0.0390614	0.382136	-0.130288	0.623992	0.0450474	0.202077	-0.228567	0.428783	0.354361	-0.143631	0.132204	-0.424734	-0.201663	-0.0300497	-0.386489	-0.119448	-0.306037	-0.0566276	-0.174345	0.0103286	-0.0328577	0.0628748	0.382244	-0.379589	-0.303534	-0.0452762	0.491756	-0.107302	-0.302554	-0.165747	-0.0935449	-0.179177	-0.284422	-0.187775	0.656382	-0.0710811	-0.156474	-0.291279
G169	-0.269708	0.0415211	-0.199856	-0.35201	-0.0974848	0.0328142	-0.272624	-0.232573	0.0154439	-0.136753	-0.216564	-0.0529489	0.439536	-0.130114	0.655446	0.304927	0.0579554	-0.309302	0.373494	0.406428	-0.265289	0.346285	-0.339755	-0.153884	-0.176391	-0.244196	-0.129047	-0.409127	-0.0697097	-0.234053	-0.0753805	0.0643114	-0.0617211	0.273887	-0.346241	-0.300356	-0.0908245	0.3785	-0.0699274	-0.262916	-0.36605	0.0630707	-0.120406	-0.125107	-0.186448	0.680543	-0.229307	-0.245589	-0.352271
G170	0.581284	0.0596315	0.403054	0.465635	0.494542	-0.192194	0.4216	0.642646	0.165072	0.245894	0.436654	-0.162112	-0.270644	0.170253	-0.131681	-0.233204	-0.183466	0.391909	-0.475953	-0.45227	0.456972	-0.172038	0.553836	0.19522	0.0598709	0.312284	0.438556	0.543518	0.203927	0.336163	-0.0752281	-0.231397	0.0564099	-0.261958	0.229917	0.657905	0.363722	-0.0895833	-0.323037	0.569508	0.312981	0.0307463	0.255929	0.329785	0.159609	-0.109217	-0.0302674	0.336403	0.188711
G171	0.629107	-0.079222	0.256495	0.667374	0.56041	-0.0832925	0.517789	0.429305	0.0732796	0.41742	0.33561	-0.0370806	-0.0863835	0.302707	0.00678051	-0.288993	-0.179918	0.57556	-0.593975	-0.315223	0.436097	-0.345958	0.342149	0.43146	0.179047	0.374343	0.548786	0.488273	0.409649	0.154341	0.0605787	0.0513381	0.132857	-0.150031	0.427869	0.59946	0.349073	0.105909	-0.155473	0.394521	0.327783	0.284988	0.298419	0.0936102	0.0537978	-0.123562	-0.119513	0.465134	0.120449
G172	0.585094	0.241475	0.239669	0.648241	0.591537	0.0922171	0.487794	0.271993	0.0803975	0.474277	0.28906	0.11233	-0.0483996	0.315027	0.0276553	-0.0602627	-0.119143	0.625341	-0.507428	-0.382593	0.501986	-0.301161	0.249769	0.382985	0.0876242	0.354426	0.580261	0.436206	0.533396	0.263765	-0.0620698	0.05678	0.0277424	-0.166291	0.503053	0.529065	0.416541	-0.104624	-0.0159445	0.271928	0.293086	0.35177	0.440951	0.25767	-0.0423918	-0.177893	-0.149334	0.588141	0.176739
G173	-0.455644	-0.0762617	-0.29609	-0.41803	-0.404665	0.152404	-0.399484	-0.270818	-0.11997	-0.248201	-0.275869	0.0790044	-0.0693179	-0.28784	0.186143	0.276347	0.0416082	-0.372623	0.679107	0.54428	-0.42086	0.485617	-0.551398	-0.238145	-0.188058	-0.399658	-0.257257	-0.516853	-0.279786	-0.340451	-0.0660314	-0.0201456	-0.189125	0.125303	-0.263983	-0.471229	-0.206246	-0.00693288	-0.0336196	-0.420707	-0.240496	-0.0970494	-0.146809	-0.259172	0.103928	0.394304	-0.118185	-0.348092	-0.0478118
G174	0.278872	-0.00325421	0.230069	0.316638	0.241192	-0.0431319	0.344456	0.279808	0.0363405	0.375257	0.285632	-0.203905	-0.143174	0.326977	0.029462	-0.368117	0.275672	0.204036	-0.155016	-0.14953	0.273539	-0.282115	0.270948	0.22761	0.205233	0.0728225	0.329132	0.329851	0.0940456	0.148224	0.305886	0.381766	0.567702	0.307779	0.229678	0.370838	0.281507	0.152382	-0.27208	0.180636	0.37147	0.0531231	0.222015	0.110436	0.174432	0.113897	0.0465711	0.151119	0.0275465
G175	0.492126	0.192303	0.424887	0.513349	0.648241	0.0323353	0.671575	0.356515	0.278066	0.276477	0.481397	-0.149443	0.114159	0.172734	0.197135	-0.159522	-0.13031	0.571685	-0.497197	-0.571881	0.482896	-0.282659	0.387055	0.38527	0.107128	0.458887	0.632046	0.306908	0.711322	0.212656	-0.0780906	-0.0433713	-0.111786	-0.0172723	0.403859	0.644867	0.473071	-0.0549515	0.0507722	0.429762	0.0491614	0.472535	0.45745	0.410063	-0.102448	-0.0262187	-0.176739	0.587924	0.129875
G176	0.598589	0.0188614	0.381156	0.55512	0.455208	-0.19731	0.512282	0.303251	0.0594573	0.364069	0.438755	-0.217292	-0.216029	0.185882	-0.271884	-0.458669	-0.165812	0.464655	-0.496762	-0.409432	0.372166	-0.325323	0.540166	0.231767	0.287513	0.342084	0.425757	0.530327	0.236229	0.305972	0.0238027	-0.00266649	0.21788	-0.11024	0.30373	0.666961	0.325336	-0.00225291	-0.217401	0.338166	0.446871	0.149813	0.26814	0.263439	0.006454	-0.22084	0.0206027	0.40288	0.112156
G177	0.356407	0.0580207	0.403424	0.317835	0.384922	0.0239331	0.444259	0.295632	0.29622	0.163505	0.393489	-0.0972453	0.0220176	0.135425	-0.133183	-0.208716	-0.155778	0.315658	-0.338623	-0.359976	0.282289	-0.125107	0.333442	0.315593	0.102491	0.347547	0.468617	0.452945	0.383942	0.158542	-0.186906	-0.0502715	0.0120047	-0.0215387	0.184619	0.51718	0.28721	-0.260043	0.0616994	0.409649	0.18758	0.343825	0.277239	0.326063	0.0675548	-0.207018	0.0573459	0.311566	0.127915
G178	-0.19694	-0.0453304	-0.140954	-0.409475	-0.22663	0.101599	-0.333878	-0.223387	-0.0254133	-0.148137	-0.161634	0.161677	0.170144	-0.0690785	0.147092	0.680152	-0.0730837	-0.365962	0.241824	0.360216	-0.390712	0.665372	-0.322798	-0.0367541	-0.262524	-0.0932837	-0.320338	-0.402902	-0.141368	-0.354556	-0.100413	-0.117837	-0.240169	-0.0601757	-0.389493	-0.269969	0.0445579	-0.313765	0.0053874	-0.215986	-0.310216	-0.0930225	-0.15088	-0.0286131	0.164767	0.148616	-0.0518823	-0.308845	-0.114507
G179	0.32837	0.102252	0.377673	0.18623	0.440603	0.134598	0.38133	0.281266	0.229656	0.15482	0.343566	0.0288961	0.208629	0.196635	0.0324877	0.167597	-0.0791132	0.287339	-0.363263	-0.295828	0.307387	-0.0537543	0.133292	0.331374	0.119078	0.336577	0.168686	0.202142	0.390908	0.0528401	-0.137015	-0.0481166	-0.0753475	0.0378207	0.341561	0.255515	0.28635	-0.264679	0.0829225	0.277413	-0.0111993	0.331831	0.332093	0.282333	-0.103776	-0.142456	-0.093915	0.294087	0.0649645
G180	-0.0675983	-0.0887126	-0.0129407	-0.105125	-0.030964	0.182682	0.139452	-0.153601	-0.0337937	0.059392	-0.0156834	-0.0607198	0.291627	0.0206027	0.607732	0.0704281	0.289864	0.0321176	0.102992	0.0370806	0.0984208	-0.0762182	-0.0561487	-0.0204721	-0.0410422	0.0386043	0.190583	-0.0423265	0.0941326	0.1967	0.0233782	-0.0256092	0.0227577	0.122582	-0.114964	-0.0663576	0.179135	0.195655	0.118229	-0.0734319	-0.165573	0.0583254	-0.00810831	-0.0677724	-0.28858	0.469422	-0.03227	0.0543203	-0.11196
G181	0.52593	0.0334454	0.417007	0.540906	0.563697	-0.0915641	0.436097	0.408605	0.026937	0.297853	0.384957	-0.151032	-0.0015999	0.197832	-0.0305069	-0.164637	-0.239342	0.530088	-0.500419	-0.554184	0.445478	-0.350834	0.563544	0.240387	0.198529	0.407146	0.460324	0.488469	0.233313	0.331244	-0.0611664	-0.158673	0.0241073	-0.159848	0.408975	0.52445	0.225423	0.059022	-0.138886	0.541037	0.357103	0.180875	0.238254	0.248637	0.00493029	-0.0875589	-0.130397	0.551376	0.146526
G182	-0.231658	0.0228883	-0.112504	-0.333507	-0.085208	0.15088	-0.213526	-0.0869494	0.106192	-0.0500756	-0.109436	0.2674	0.334204	0.015901	-0.00924021	0.552726	0.079788	-0.243674	0.0637673	0.123562	-0.257474	0.258084	-0.289124	-0.0324006	-0.138734	-0.0416952	-0.202751	-0.305972	0.0157486	-0.0798315	-0.128722	0.080071	-0.0724306	0.0940673	-0.12415	-0.266943	-0.0677728	-0.27774	0.236926	-0.206517	-0.250966	-0.00449494	-0.0264146	0.0263711	-0.0978984	-0.0745203	0.0810505	-0.210218	-0.114376
G183	0.0376465	0.158825	0.195176	0.0375159	0.112243	0.501856	0.342933	0.0901492	0.257518	0.073149	0.23166	0.0360357	0.2036	0.0253045	0.0915423	-0.173496	0.23414	0.072866	-0.0680119	-0.305972	0.322319	-0.15482	0.194306	0.398113	0.0408028	0.295045	0.184685	0.163679	0.316028	0.350486	-0.253525	-0.0522088	-0.0788738	0.0657916	0.0501845	0.250705	0.113376	-0.248332	0.351509	0.268532	-0.155233	0.472883	0.207148	0.199922	-0.139496	-0.00355895	0.198485	0.18734	0.204166
G184	0.208389	-0.000337393	0.17946	0.11331	0.421883	0.261958	0.305449	0.116792	0.329393	0.160109	0.206997	0.059958	0.281875	0.332114	0.225934	-0.0931096	-0.0111557	0.342563	-0.24942	-0.188777	0.239778	-0.155973	0.0395185	0.344892	-0.0829442	0.237536	0.366528	0.0359704	0.500071	-0.0118958	-0.100892	0.127676	-0.00129515	0.182508	0.0818559	0.275062	0.309685	-0.193566	0.142151	0.101207	-0.0604586	0.374996	0.416114	0.273539	-0.0789826	0.108151	-0.0718865	0.327783	-0.0019264
G185	0.0506634	0.185142	0.163222	-0.0476812	0.15445	0.494651	0.243783	-0.060611	0.273212	0.100445	0.0325096	0.485966	0.261806	0.273735	0.162634	0.0137678	0.329524	0.111438	-0.105038	-0.170536	0.21727	-0.149726	-0.0114387	0.132617	0.038822	0.0865576	0.167401	0.0679684	0.294609	0.276825	0.00856547	0.23414	0.0549297	0.084555	0.108869	0.101882	0.207193	-0.30693	0.375584	0.0180342	0.00773827	0.283182	0.132269	0.175738	-0.167815	-0.0373853	0.106845	0.174106	0.146026
G186	0.19818	0.0934143	0.167597	0.194284	0.170623	-0.0834231	0.170514	0.0224312	-0.0063234	0.0567582	0.143621	-0.120449	0.12859	-0.0165758	0.0590438	-0.202926	0.0254351	0.0807457	-0.263852	-0.262916	0.0994221	-0.0194491	0.440407	0.183749	0.132748	0.277261	0.236273	0.235772	0.00395076	0.335096	-0.0077492	-0.058456	0.0252827	-0.125935	-0.0116128	0.378914	0.131421	0.0334454	0.0524918	0.317226	0.0568017	0.246808	0.0157922	0.13105	-0.0803757	-0.107193	0.0596315	0.159522	0.129026
G187	-0.205864	-0.0976372	-0.177414	-0.284792	-0.15014	-0.0283519	-0.174193	-0.208215	0.00556154	0.0752169	-0.354417	0.0716688	0.331766	0.0438067	0.0053874	0.478151	-0.160392	-0.225607	0.0270676	0.462087	-0.238602	0.362719	-0.266225	0.14485	-0.117968	0.0163581	-0.131942	-0.188755	-0.0998574	-0.389885	0.0589679	0.136949	-0.101838	-0.0793091	-0.106562	-0.295937	-0.00761859	-0.0575854	0.119187	-0.178807	-0.299507	0.106105	-0.15223	-0.0887343	0.128133	0.0985514	-0.27195	-0.310913	-0.13906
G188	0.489035	0.073149	0.538991	0.552095	0.479392	-0.121625	0.557079	0.311893	0.0751298	0.387316	0.387373	-0.211132	-0.0710158	0.157954	-0.27676	-0.322471	-0.144132	0.577736	-0.598655	-0.534811	0.591972	-0.334422	0.655076	0.313721	0.186056	0.466244	0.552269	0.650875	0.255864	0.440777	-0.0879621	-0.0554304	0.108107	-0.250618	0.499244	0.661606	0.276555	-0.172908	-0.0392138	0.417072	0.308584	0.302206	0.318532	0.348004	0.00262296	-0.330046	-0.0603933	0.531829	0.122495
G189	-0.0781119	-0.0759134	-0.306821	-0.024695	-0.138298	-0.174911	-0.306146	-0.172647	-0.266377	-0.206038	-0.227132	-0.0190573	-0.370142	0.0330101	0.0497056	0.271558	-0.0691002	-0.101795	0.261218	0.421034	-0.215224	0.539012	-0.271362	-0.151337	-0.014595	-0.245154	-0.069405	-0.00850013	-0.335075	-0.231441	0.282976	-0.00995853	-0.0385172	-0.203992	-0.300378	-0.130658	0.000740092	0.050794	-0.442714	-0.226195	0.0680337	-0.339929	-0.0322482	-0.10051	0.590906	0.331244	-0.361892	-0.100032	-0.149051
G190	0.139082	-0.188733	0.268532	0.0419564	0.304165	-0.0304633	0.350159	0.297243	0.296786	0.124302	0.483563	-0.236861	0.139039	-0.0562576	0.219469	0.130223	-0.11627	-0.00582275	-0.11886	-0.253251	0.0426095	0.0160969	0.228807	0.363786	-0.200357	0.338318	0.184293	0.0708634	0.221602	0.0793962	-0.249226	-0.141324	-0.241388	0.0807457	0.0201892	0.288232	0.345449	-0.0938279	0.108891	0.350072	-0.228502	0.304927	0.335945	0.284292	-0.211741	0.108586	-0.0179036	0.148028	0.224867
G191	-0.118164	0.167358	0.138625	-0.11085	0.151511	0.193435	0.0765229	0.163984	0.416397	0.00144752	0.255952	0.0555175	0.261349	-0.0906281	0.164202	0.132704	0.150684	-0.13277	-0.105713	-0.236142	0.0262622	0.107193	0.128242	0.244588	-0.0122876	0.152904	0.0923695	0.0500321	0.138973	0.167445	-0.35138	0.0495532	-0.145199	0.147092	-0.028156	0.156452	0.0744228	-0.209826	0.274997	0.371796	-0.278741	0.381961	0.219142	0.258628	-0.0516864	0.00715055	-0.0285913	0.0862964	0.0909546
G192	-0.397917	-0.038909	-0.190039	-0.473885	-0.264701	0.0298974	-0.337077	-0.198768	0.216051	-0.155495	-0.0875376	-0.0890826	0.365941	-0.0620041	0.496784	0.39833	0.334944	-0.48627	0.40177	0.23784	-0.443693	0.286512	-0.295981	-0.093349	-0.122212	-0.241236	-0.238689	-0.404578	-0.134206	-0.241454	0.110916	0.20717	0.0607851	0.46052	-0.46459	-0.434617	-0.0656831	0.133466	0.0246079	-0.167793	-0.407277	-0.0451127	-0.128373	-0.172952	-0.165965	0.32578	0.150575	-0.366289	-0.374408
G193	0.244958	0.207976	0.284161	0.276455	0.25545	0.377782	0.490167	-0.0639632	0.097093	0.111481	0.18031	0.164376	0.167358	0.0775024	0.0284825	-0.170732	0.139626	0.494825	-0.243783	-0.531829	0.440711	-0.317813	0.28168	0.117685	0.127545	0.30164	0.425757	0.169861	0.459214	0.414308	-0.146516	-0.144437	-0.206387	-0.113418	0.271732	0.319533	0.251979	-0.278066	0.444151	0.230396	-0.0256092	0.37874	0.206365	0.206778	-0.15027	-0.145808	0.162939	0.549678	0.24289
G194	0.0657481	-0.172974	-0.257866	0.177697	-0.0304198	-0.378609	-0.184489	0.0167064	-0.307996	0.0240637	-0.0938937	-0.261937	-0.244806	-0.0380383	0.126566	0.17933	-0.295241	0.028439	0.0512075	0.432004	-0.185425	0.314396	-0.0664011	-0.155821	-0.0722783	-0.128677	-0.0134195	0.0465711	-0.241584	-0.325824	0.144024	-0.151555	0.0452215	-0.141019	-0.0643767	0.0145079	-0.0863186	0.445914	-0.662738	-0.14583	0.120754	-0.295045	-0.170623	-0.127524	0.274823	0.339102	-0.499287	-0.136992	-0.30423
G195	0.604858	0.159282	0.438078	0.581241	0.440907	-0.0621565	0.47136	0.349659	0.0603063	0.40436	0.298529	-0.0461358	-0.170601	0.309041	-0.188711	-0.371404	-0.113723	0.579739	-0.481394	-0.31679	0.6066	-0.341213	0.384138	0.207235	0.0650733	0.322363	0.464568	0.506666	0.365636	0.407103	2.17674e-05	-0.0314646	0.227153	-0.185991	0.520118	0.597849	0.213593	-0.114964	-0.171798	0.206147	0.410302	0.149313	0.375975	0.216748	0.0558004	-0.23451	-0.0737584	0.514219	0.185316
G196	0.429371	0.141215	0.206387	0.495478	0.419902	0.0877548	0.354818	0.154363	-0.0825089	0.432527	0.178819	0.026937	-0.0323571	0.313677	0.0357528	-0.165573	-0.315049	0.600331	-0.35349	-0.126043	0.358192	-0.0935231	0.201641	0.140083	0.0865358	0.224105	0.462936	0.440646	0.273495	0.0851427	0.0634084	-0.130593	-0.0135501	-0.23784	0.361152	0.416376	0.0528404	0.173278	-0.192826	0.212503	0.221863	0.23303	0.105125	0.103623	0.11233	0.0510769	-0.319228	0.465483	-0.0797009
G197	0.546348	0.162373	0.439841	0.49637	0.483484	-0.0580207	0.468748	0.236687	-0.10223	0.391822	0.277817	0.0224747	-0.15371	0.308344	-0.103971	-0.290757	-0.093719	0.593561	-0.372166	-0.34228	0.534768	-0.353838	0.411413	0.221602	0.0616776	0.387207	0.5125	0.395849	0.356973	0.277261	0.0130387	0.0243685	0.151272	-0.127001	0.446871	0.526322	0.387928	-0.050511	-0.0256527	0.242194	0.333486	0.23562	0.308279	0.227936	0.119883	-0.0947421	-0.0838802	0.489339	0.288319
G198	-0.152055	0.225999	-0.0879943	0.0161622	0.00201347	0.0402804	-0.0901492	-0.148594	0.0283519	-0.0666623	0.0355788	0.0478554	-0.152839	-0.0798098	0.21653	0.0641155	0.133793	-0.0437196	0.18414	0.088582	-0.0427183	0.301684	0.000816273	-0.0125488	0.0358398	-0.0603933	-0.00395076	-0.0148344	-0.111024	-0.100097	0.0974418	0.139322	-0.0356222	0.142739	-0.0560616	0.0617647	0.0719522	0.0569106	-0.122299	0.0127883	-0.0545162	-0.104407	0.0513599	0.0422612	0.194654	0.135904	-0.299115	-0.0386914	-0.140998
G199	-0.386402	-0.34278	-0.185272	-0.230635	-0.38601	-0.13967	-0.356907	-0.184859	-0.239386	-0.186448	-0.296701	-0.161655	0.0981813	-0.283987	0.0699927	0.0366017	-0.0794179	-0.220927	0.369206	0.417638	-0.364874	0.179134	-0.250139	-0.24252	-0.0857522	-0.241911	-0.246155	-0.251205	-0.260609	-0.194066	-0.0945685	-0.105125	0.0525571	0.148747	-0.263221	-0.326346	-0.304918	0.25373	-0.167902	-0.236034	-0.00980616	-0.227479	-0.388296	-0.367726	-0.0161622	0.18586	-0.137297	-0.330308	-0.169687
G200	0.683482	0.11947	0.400268	0.689033	0.588424	-0.107258	0.512152	0.312546	0.0341638	0.322624	0.314909	-0.0653563	-0.227435	0.344739	-0.11701	-0.102382	-0.262133	0.609691	-0.534877	-0.380068	0.580719	-0.273473	0.344282	0.318031	0.13512	0.32763	0.522165	0.598437	0.334835	0.179722	0.019275	-0.0674242	-0.0104592	-0.234336	0.53529	0.554968	0.315889	-0.129417	-0.18919	0.315397	0.324126	0.0940891	0.443998	0.2233	0.115269	-0.209086	-0.280918	0.527149	0.0798533
G201	0.604644	0.167957	0.40076	0.592128	0.544337	-0.0227361	0.590876	0.432834	-0.0402588	0.335262	0.403962	-0.132335	-0.148084	0.291825	-0.0976486	-0.20013	-0.162461	0.619947	-0.530515	-0.424377	0.618466	-0.294709	0.466388	0.266803	0.0289833	0.394436	0.432301	0.577859	0.37158	0.295199	-0.0292338	-0.103058	0.132553	-0.119394	0.43993	0.633018	0.443045	-0.00620371	-0.198225	0.373899	0.408204	0.166227	0.431343	0.399824	0.081323	-0.112701	-0.151577	0.576488	0.20814
G202	0.684135	0.152012	0.388492	0.690252	0.51065	-0.167902	0.510018	0.349572	-0.205646	0.390843	0.30494	0.063136	-0.349071	0.357996	-0.390255	-0.372471	-0.242738	0.668223	-0.535094	-0.352772	0.549395	-0.399658	0.412022	0.049009	0.291627	0.246047	0.448896	0.594846	0.173518	0.344935	0.205027	-0.0346644	0.258584	-0.293282	0.546021	0.562412	0.217358	0.0568235	-0.309476	0.231201	0.655097	-0.0834667	0.243739	0.159696	0.134359	-0.229024	-0.104298	0.579391	0.151859
G203	-0.152012	0.0531884	-0.193413	-0.153906	-0.0336849	0.00736823	-0.170666	-0.160175	-0.133858	-0.0756087	-0.154102	-0.105843	0.33649	-0.193479	0.634767	0.0448297	-0.0316823	-0.150771	0.311414	0.347286	-0.0973977	0.110284	-0.321862	-0.172081	-0.0806587	-0.234336	-0.0107857	-0.259346	0.0102633	-0.135861	0.000370046	-0.0180342	0.0216476	0.143065	-0.233661	-0.200618	-0.0927836	0.687444	-0.187688	-0.248484	-0.239756	-0.0329448	-0.115813	-0.205059	-0.132487	0.766589	-0.273452	-0.130397	-0.282093
G204	0.39365	0.221167	0.216791	0.395152	0.329415	0.140432	0.38749	0.225651	0.149334	0.206321	0.156138	0.108782	-0.0890391	0.249355	-0.199029	-0.237514	0.0541026	0.400181	-0.437729	-0.545173	0.518638	-0.372427	0.410063	0.106083	0.111612	0.288123	0.265485	0.445043	0.165355	0.627888	-0.00842399	-0.0950904	0.0257834	-0.248332	0.21912	0.408648	0.106856	-0.14953	0.0703192	0.28329	0.290212	0.0752386	0.262546	0.243979	-0.143958	-0.397699	0.111133	0.432505	0.152012
G205	-0.330743	-0.0725395	-0.0748468	-0.43725	-0.149835	0.203165	-0.258301	-0.0295926	0.0397579	-0.0639414	-0.192783	-0.0339243	0.472165	0.0116999	0.536618	0.0377554	0.175085	-0.438665	0.280526	0.415178	-0.207388	0.145046	-0.349202	0.0468541	-0.134772	-0.232943	-0.183161	-0.257496	-0.0935884	-0.119383	-0.0462666	0.186709	0.104385	0.329415	-0.240801	-0.312959	-0.167925	0.310761	0.138037	-0.275606	-0.347983	0.104733	-0.0663358	-0.0938061	-0.301727	0.394238	-0.0345991	-0.454882	-0.127284
G206	-0.00717232	0.137471	0.280809	-0.0117217	0.0898009	0.0525353	0.129831	0.126109	0.0655086	0.0941979	0.0693401	0.0194055	-0.0304633	0.172778	-0.203274	-0.195982	0.347591	0.0186654	-0.202164	-0.46163	0.107868	-0.24141	0.335945	0.128024	0.225215	0.180005	0.113266	0.249029	0.000467997	0.280874	0.0728011	0.261175	0.254862	0.0953951	0.202904	0.0657916	-0.0807244	-0.206952	0.313939	0.200966	0.0163581	0.0883425	0.00656284	0.191454	-0.185838	-0.380525	0.458495	0.0229536	0.153993
G207	0.58973	0.147114	0.430764	0.616482	0.700243	0.0239114	0.717526	0.434312	0.22774	0.328262	0.484608	-0.157802	0.013746	0.194088	-0.0112428	-0.304448	-0.108085	0.686464	-0.669028	-0.623927	0.700678	-0.387882	0.608232	0.472622	0.0980725	0.501638	0.585159	0.567702	0.590688	0.35325	-0.12341	-0.0906063	-0.0103939	-0.102557	0.553705	0.770094	0.413592	-0.117054	-0.00712879	0.530937	0.210348	0.398613	0.491103	0.483832	-0.0576289	-0.217706	-0.175433	0.662629	0.1701
G208	0.0369282	0.0396056	0.191432	0.002993	0.241954	0.281658	0.307953	0.176761	0.363133	0.0723218	0.216357	0.0105463	0.2339	0.176979	0.0601757	-0.113223	0.165769	0.0313558	-0.137776	-0.262416	0.0480731	-0.0447427	0.0374506	0.428435	0.139104	0.177284	0.206365	0.00902254	0.350159	0.100902	-0.125696	0.114115	-0.0564099	0.246743	-0.0132454	0.130723	0.152187	-0.229024	0.417877	0.27787	-0.174236	0.412936	0.263547	0.229699	-0.181245	-0.140236	0.142391	0.109435	0.201467
G209	0.444521	-0.0719518	0.422079	0.480001	0.479327	-0.101599	0.424669	0.389907	0.120732	0.33218	0.321864	-0.143893	-0.0940891	0.215028	-0.202599	-0.271079	-0.11233	0.5194	-0.525016	-0.480001	0.495978	-0.400072	0.514568	0.349071	0.0512946	0.381113	0.505926	0.541624	0.366028	0.281135	-0.0326946	0.0677071	0.083902	-0.118577	0.418117	0.537445	0.243773	-0.130462	-0.0688608	0.478674	0.320991	0.218772	0.316028	0.30669	0.0648556	-0.256582	-0.168664	0.441473	0.196983
G210	-0.141281	-0.0252392	-0.0992915	-0.155756	-0.0400627	0.123976	-0.0598492	-0.171537	-0.0125706	-0.0826613	-0.0868846	-0.255537	0.216965	-0.126457	0.870702	0.155691	0.059022	-0.188929	0.318162	0.261937	-0.0914988	0.207888	-0.20495	0.0468976	-0.129635	-0.11886	0.00924021	-0.17465	0.0471371	-0.109413	-0.00290595	-0.0537108	-0.119448	0.154929	-0.27319	-0.122256	0.0370481	0.423341	-0.0894962	-0.104559	-0.370338	0.0743679	-0.0673589	-0.161306	-0.192738	0.616635	-0.281222	-0.137254	-0.150445
G211	-0.0313122	0.134054	-0.0316823	-0.0689914	-0.0519912	-0.170753	-0.125695	0.0340767	-0.0375595	0.198942	-0.0141706	0.0584343	-0.0229971	0.444891	-0.0160534	0.0137243	0.431569	-0.184728	-0.0783296	0.154863	-0.200683	-0.0117217	-0.0451345	0.0664011	0.115682	-0.164332	-0.0596097	0.0250215	-0.16246	-0.183836	0.557518	0.705423	0.741622	0.480611	-0.0263928	-0.162286	-0.0157596	0.133989	-0.269076	-0.115835	0.305275	-0.171646	-0.0311163	-0.0660311	0.0680772	0.0290267	0.17872	-0.239386	-0.362414
G212	0.142086	-0.040498	0.0063887	0.105626	0.0670106	0.0235849	0.138581	-0.10519	-0.0689479	0.118686	0.0463428	-0.112156	0.133053	0.186361	0.352314	-0.0110251	0.148224	0.183749	-0.096157	-0.111525	0.116945	-0.085491	0.0835537	-0.157606	0.1361	0.0228448	0.301684	0.101207	0.0148344	0.227762	0.194601	-0.0851645	0.0437414	0.00601865	-0.153078	0.0879943	0.196538	0.270143	-0.0887343	0.0923912	0.0514905	-0.0464187	-0.0354916	-0.0472024	-0.0820736	0.378522	-0.0775895	0.20741	-0.0234325
G213	0.599047	0.159195	0.274779	0.548634	0.582308	0.0886255	0.628258	0.398592	0.147724	0.267857	0.486882	-0.0128318	0.0806587	0.272907	-0.120602	-0.383833	-0.0815511	0.577976	-0.583265	-0.597479	0.598742	-0.517376	0.425823	0.385618	0.213766	0.392149	0.475278	0.39291	0.461303	0.374909	-0.046321	-0.0458093	0.0643767	-0.127828	0.366986	0.651332	0.299748	-0.0333366	0.0303327	0.442736	0.359389	0.398265	0.371187	0.371513	-0.0444814	-0.10987	-0.00756413	0.567745	0.271014
G214	-0.0873848	-0.0198844	-0.0796574	-0.137362	-0.00900077	0.184989	0.184924	-0.0975719	-0.0322482	-0.0512511	0.0875376	-0.228959	0.468073	-0.114855	0.399832	-0.170579	0.0989432	-0.016554	0.126871	0.0808981	0.141694	0.000729204	-0.0959828	-0.0453739	0.00932728	-0.0683384	0.12539	-0.0275465	0.0297668	0.137232	-0.130289	-0.198942	-0.029745	0.156169	-0.164985	0.0639196	0.05727	0.411979	-0.00514796	-0.0161187	-0.201228	0.0337502	-0.0153786	-0.0102415	-0.236404	0.550767	-0.180396	-0.0502498	-0.112352
G215	0.578106	0.102883	0.322167	0.515068	0.549461	-0.0973107	0.49341	0.394478	0.0873848	0.277674	0.474159	0.00401606	-0.0359487	0.128656	0.0175335	-0.149204	-0.197331	0.546805	-0.397351	-0.320556	0.371339	-0.200183	0.435901	0.252598	0.18451	0.345305	0.566309	0.419902	0.432309	0.200596	-0.0768934	-0.0357092	0.0564752	-0.121755	0.33945	0.632111	0.474595	-0.120515	-0.165377	0.395022	0.275846	0.284444	0.341844	0.281614	0.167488	0.0422394	-0.114703	0.476954	0.141128
G216	0.514764	0.201968	0.475583	0.43836	0.632742	0.0527095	0.504185	0.413437	0.245241	0.358997	0.476347	-0.0579772	0.0811811	0.213744	0.134707	-0.17687	-0.0844244	0.543366	-0.447046	-0.415396	0.530306	-0.331157	0.433136	0.340342	-0.0515994	0.387033	0.489622	0.468726	0.545651	0.293194	-0.241662	-0.00401606	0.0815076	0.0183825	0.459105	0.570706	0.415366	-0.141411	-0.024042	0.415178	0.223931	0.422449	0.527127	0.466136	-0.129809	-0.024695	-0.0622436	0.522143	0.092979
G217	-0.276499	0.149378	0.100293	-0.229656	-0.127676	0.0912593	-0.0544291	0.0381472	0.0969841	-0.262133	0.186002	-0.128808	0.128743	-0.235359	-0.0409116	0.0993132	0.00218761	-0.168664	0.0650951	-0.0908675	-0.00682404	0.0455263	0.0718865	0.137254	-0.0956781	0.110284	-0.19916	-0.0521218	0.0313993	0.0674459	-0.240007	0.0234325	-0.0425877	0.137471	-0.0356439	-0.00664991	-0.179853	-0.161568	0.162482	0.153361	-0.13462	0.186143	0.106431	0.0544509	-0.0674895	-0.0781337	0.0920647	-0.159652	0.0507069
G218	-0.0267629	-0.0819865	0.0311381	0.00527857	0.026001	0.0637673	0.00882663	-0.0966794	-0.154232	0.112091	-0.14508	-0.0364711	-0.0190573	0.14054	-0.123997	-0.159979	-0.0685343	0.183291	-0.0585213	0.0690567	0.159282	-0.122648	0.244283	0.00961026	-0.141803	0.152883	0.10088	0.14189	-0.127937	0.0626354	0.115618	0.051447	0.0415646	-0.128177	0.154406	0.00423374	0.0190682	-0.0437631	0.163701	-0.0948727	0.103797	0.116727	0.0610464	0.141259	-0.0594573	-0.0191008	0.0529489	-0.0479642	0.0132889
G219	-0.396241	0.062766	-0.0717559	-0.349223	-0.151751	0.0860352	-0.0988344	-0.177088	0.192238	-0.03264	-0.22009	-0.0158139	0.0731925	0.0556698	-0.0245644	0.0201239	0.203121	-0.350247	0.273038	0.177632	-0.209412	0.032836	-0.0923695	-0.068839	0.0584778	-0.109043	-0.22774	-0.266617	-0.131659	-0.198289	0.174673	0.35349	0.161437	0.372884	-0.107476	-0.341257	-0.0441334	0.0602845	0.17748	-0.175825	-0.190714	0.0148562	0.0509463	0.0460052	-0.0716253	0.0149432	0.0304198	-0.192934	-0.120079
G220	-0.536183	-0.246917	-0.238167	-0.519748	-0.452183	0.211545	-0.398722	-0.452553	-0.111938	-0.219795	-0.285349	-0.031334	0.0728442	-0.138886	0.39106	0.289559	0.21801	-0.457625	0.606752	0.3711	-0.394782	0.348766	-0.276869	-0.110654	-0.128481	-0.249551	-0.359541	-0.39561	-0.308998	-0.175782	-0.0467999	-0.0229536	-0.165486	0.182399	-0.480067	-0.508908	-0.140487	-0.0364711	0.255189	-0.279002	-0.40584	0.0627007	-0.318793	-0.274997	-0.0614599	0.258497	0.195721	-0.379872	0.0358834
G221	-0.236861	-0.127306	-0.117032	-0.295611	-0.106018	0.0926525	-0.181441	-0.157084	-0.146069	-0.0637673	-0.0970064	0.125956	0.404164	-0.0230842	0.492888	0.0995309	0.170906	-0.217836	0.269185	0.297744	-0.237448	0.0841197	-0.30114	-0.149465	-0.101381	-0.193674	0.00438611	-0.299768	-0.0655522	-0.121951	0.0461904	0.0381254	0.070624	0.265811	-0.307213	-0.200901	0.060078	0.376324	0.0086525	-0.305645	-0.270034	-0.0640067	-0.266638	-0.151337	-0.146156	0.526039	-0.108521	-0.210326	-0.173561
G222	0.0463752	-0.0657263	-0.0647903	0.0705804	-0.0418041	0.040498	0.149204	-0.176718	-0.0648556	-0.000467997	-0.0123748	0.0671194	-0.0469629	0.0354916	0.163614	0.283464	0.173975	0.153884	-0.0441332	-0.0140943	0.147963	0.0326183	0.0488131	-0.0152044	0.0273506	0.0981813	0.10395	0.0790261	0.108673	0.0669018	0.113756	-0.0680337	-0.0229101	-0.0636802	-0.0190573	0.0487043	0.242794	-0.0300933	-0.125173	0.00501736	0.0623524	-0.109936	-0.0223224	-0.0303109	0.15704	0.236164	-0.160305	0.227261	-0.106845
G223	-0.0721041	0.0879943	0.0569323	-0.129352	0.0665752	0.23488	0.137928	0.0306592	0.0483778	-0.0269588	0.154897	0.15913	0.0567582	0.0358616	0.122713	0.0450039	0.233356	-0.0615252	-0.0278948	-0.0215387	0.211567	-0.116205	0.0781772	0.167837	-0.139191	0.188124	-0.0548209	0.0575636	0.00035916	0.207693	-0.0319981	0.0169241	-0.145765	-0.0617429	0.151381	0.0649209	0.217489	-0.19374	0.21862	-0.0480077	-0.207976	0.106518	0.210022	0.321448	-0.158368	-0.0297668	0.0327271	-0.0210598	0.059392
G224	-0.248366	0.031628	-0.168676	-0.237101	-0.144209	0.129407	-0.0227687	-0.193904	0.264594	-0.251033	-0.0169787	0.0216586	0.334837	-0.0984104	0.108369	0.135328	0.144274	-0.140041	0.194568	0.0183608	-0.169383	0.189572	-0.284979	-0.010013	-0.0782756	-0.0422179	0.0417172	-0.30691	0.131845	-0.0910204	-0.148825	-0.0626792	-0.237754	0.145297	-0.272321	-0.200859	-0.0476382	-0.0914122	0.234979	-0.00998035	-0.27477	0.179385	0.0215933	0.0185132	-0.0563232	0.0304199	0.0064105	-0.00294948	0.00286241
G225	-0.211328	-0.0285043	-0.166879	-0.244697	-0.218772	-0.028526	-0.354491	-0.18044	-0.10469	-0.272102	-0.189387	0.00207878	-0.1627	-0.262633	0.169709	0.281048	-0.222168	-0.228263	0.479522	0.409824	-0.359868	0.694953	-0.183357	-0.0728878	-0.128721	-0.225999	-0.206104	-0.298593	-0.215311	-0.285075	-0.203416	-0.213396	-0.328305	-0.0929354	-0.33231	-0.232137	-0.0465714	-0.0355133	-0.110262	-0.123758	-0.23562	-0.0496403	-0.162482	-0.174084	0.315484	0.300051	-0.253883	-0.249682	-0.0444597
G226	0.508342	0.0766753	0.49058	0.440885	0.541624	-0.0142685	0.536901	0.528281	0.236687	0.234466	0.543238	-0.214136	-0.0944809	0.155081	-0.0151391	-0.270056	-0.00155636	0.378217	-0.453489	-0.599656	0.518812	-0.286077	0.590927	0.54613	0.0359922	0.482069	0.4923	0.538947	0.390146	0.413393	-0.14595	0.0017958	0.0971147	-0.0274812	0.299703	0.676451	0.408639	-0.208585	-0.0158575	0.592125	0.229721	0.330504	0.465483	0.404295	0.0206245	-0.160719	-0.0289178	0.397264	0.288797
G227	0.200509	0.0519476	0.287644	0.131072	0.116292	0.212046	0.334792	0.0852516	0.0646162	0.0427618	0.26147	0.178328	0.103144	0.0624395	-0.144611	-0.164463	0.119709	0.297613	-0.199421	-0.548089	0.353555	-0.445239	0.327521	0.136165	0.159913	0.278567	0.251271	0.158934	0.257997	0.426127	-0.209315	-0.0847945	-0.112287	-0.144197	0.209695	0.190627	0.194318	-0.357822	0.477781	0.294958	0.0886255	0.368226	0.140475	0.131529	-0.169622	-0.292672	0.393607	0.34154	0.411696
G228	0.0517517	-0.0868406	0.215202	0.0537543	0.18808	0.0901492	0.0863399	0.225106	0.138756	0.0409334	0.0694163	-0.249072	-0.0152262	-0.0186219	0.029179	-0.180549	-0.23229	0.000141487	-0.0103503	-0.0425006	0.00614926	0.0967229	0.103514	0.166291	-0.0925654	0.11418	0.117054	0.105843	0.213309	0.0628095	-0.263494	-0.187884	-0.103819	0.0177077	-0.0439808	0.181942	0.00623636	-0.0264581	-0.16061	0.276651	-0.0866664	0.26653	0.15445	0.119143	-0.00149106	-0.0195361	-0.0928048	0.0692091	0.100271
G229	-0.04754	-0.12525	-0.114932	0.0354265	-0.0869281	-0.170831	-0.160284	-0.274868	-0.329428	0.0208205	-0.173955	-0.135687	0.129603	0.0288527	0.366618	-0.017871	-0.0494773	-0.00263386	0.11491	0.317978	-0.0749125	0.100228	-0.0686544	-0.0923482	0.0742704	-0.0824876	0.03584	0.0711359	-0.149118	-0.0290486	0.0850348	-0.0282106	0.115465	0.0174901	-0.141107	-0.114595	-0.0669896	0.504645	-0.228634	-0.100413	0.0169459	-0.0171418	-0.225282	-0.268066	-0.0651281	0.385893	-0.267576	-0.112581	-0.148965
G230	0.384965	0.0732143	0.355906	0.440363	0.451443	0.180505	0.524015	0.239103	0.106018	0.307365	0.370296	0.02254	0.0957434	0.290299	0.0677942	-0.187536	0.142173	0.499331	-0.451617	-0.573144	0.433985	-0.501921	0.485726	0.265789	0.116183	0.471882	0.527258	0.454142	0.380285	0.404229	0.0138985	0.138407	0.14559	0.0960264	0.355014	0.548764	0.362166	-0.113919	0.0884731	0.392497	0.290931	0.36359	0.300486	0.277283	-0.160653	-0.120079	0.0507287	0.494716	0.231615
G231	0.464851	0.000272091	0.471904	0.362872	0.550179	-0.12415	0.559452	0.518138	0.421012	0.220666	0.460566	-0.262394	0.00486499	0.147506	-0.0453957	-0.160719	-0.197549	0.331244	-0.487206	-0.508103	0.344348	-0.231658	0.534594	0.478499	-0.023106	0.42715	0.37184	0.394957	0.432745	0.285053	-0.159501	-0.0574765	-0.0296797	-0.0593267	0.224214	0.574145	0.266194	-0.231462	-0.0377118	0.526627	0.14435	0.328958	0.290278	0.398069	-0.178263	-0.225063	0.0143991	0.374474	0.226195
G232	-0.204776	0.0144208	-0.00654107	-0.368662	-0.27417	0.495652	-0.0120047	-0.208759	0.114028	-0.198942	-0.0500215	0.345088	0.174824	-0.0885384	0.024129	0.115095	0.285663	-0.221928	0.269577	-0.112112	-0.0245644	-0.151838	-0.239429	-0.0198626	0.0523394	-0.109587	-0.163984	-0.224497	0.0268499	0.14435	-0.112668	0.00122985	-0.163723	0.0895615	-0.201315	-0.230331	-0.0233129	-0.316028	0.571402	-0.162613	-0.248506	0.156714	-0.112918	-0.0957216	-0.177523	0.0457875	0.399027	-0.0953298	0.289755
G233	0.662672	0.155255	0.399005	0.743015	0.655642	0.0617864	0.608036	0.390951	0.080724	0.438165	0.339582	-0.0438502	-0.0175771	0.323473	0.043589	-0.291693	-0.127632	0.753986	-0.544019	-0.454817	0.607732	-0.4923	0.432266	0.313155	0.194436	0.414025	0.607166	0.552465	0.561737	0.366485	-0.0187962	-0.0375812	0.117946	-0.106431	0.575342	0.652529	0.311524	0.09644	-0.108085	0.344979	0.40732	0.286164	0.377804	0.250117	0.0220394	-0.0972018	-0.192172	0.729781	0.122125
G234	-0.385272	-0.127818	-0.0448844	-0.480461	-0.155898	0.077394	-0.12476	-0.182052	0.283705	-0.0775464	-0.11872	-0.0241945	0.397016	-0.0717454	0.124335	0.308455	0.142326	-0.380168	0.152753	0.0356115	-0.257683	0.237189	-0.212287	0.0847187	-0.0667171	0.00980622	-0.193567	-0.219916	-0.0498365	-0.233314	-0.114911	0.125674	-0.0987914	0.283575	-0.267336	-0.328601	-0.13128	-0.12501	0.297691	-0.0599474	-0.391454	0.0628098	-0.128613	-0.133826	-0.229853	0.102666	0.192097	-0.263821	-0.196473
G235	-0.109479	-0.104189	-0.315484	0.0722347	-0.263591	-0.239756	-0.276216	-0.243086	-0.477977	-0.0508593	-0.357051	-0.0665317	-0.429806	-0.0569106	-0.0378424	-0.0179471	-0.0502062	-0.0793526	0.408801	0.476758	-0.191998	0.277087	-0.218642	-0.336794	-0.0110251	-0.328566	-0.176282	-0.103362	-0.48971	-0.1398	0.228547	-0.052753	0.149051	-0.0243685	-0.0721041	-0.221885	-0.192892	0.368858	-0.499265	-0.396785	0.272189	-0.46324	-0.23882	-0.376433	0.318662	0.277174	-0.286904	-0.120449	-0.239081
G236	0.237818	0.102622	0.278262	0.110001	0.400572	0.0124835	0.219817	0.267204	0.369358	0.186034	0.401826	-0.024695	0.233117	0.0330972	0.154145	0.0140508	-0.125521	0.0400192	-0.23969	-0.275258	0.0897792	-0.109152	0.229003	0.264396	0.07193	0.219839	0.359193	0.208803	0.260478	0.0469629	-0.168208	-0.081377	-0.0646597	-0.0187961	0.0371894	0.329089	0.19644	-0.117293	0.152534	0.390995	-0.174911	0.38699	0.174497	0.367552	-0.0717123	0.0285696	0.0283954	0.160893	0.163831
G237	0.336968	-0.0204939	0.378718	0.310848	0.451922	0.0303109	0.523971	0.482135	0.3312	0.214114	0.394937	-0.168468	-0.0881902	0.07698	-0.0664882	-0.124454	-0.24781	0.237775	-0.271863	-0.264875	0.279416	-0.022823	0.310042	0.417094	-0.0489437	0.397177	0.289755	0.241279	0.293586	0.0733013	-0.120341	-0.0954387	-0.136601	-0.103906	0.180396	0.579826	0.475291	-0.175999	-0.11873	0.410694	0.124716	0.366855	0.363916	0.390429	0.0943721	-0.0158792	-0.222886	0.283813	0.192543
G238	-0.369315	0.190388	-0.255385	-0.426824	-0.141738	0.0305286	-0.367726	-0.20606	0.00336305	-0.161611	-0.222408	0.0899315	0.296264	-0.0989867	0.455056	0.526279	0.166095	-0.350181	0.261066	0.399158	-0.352184	0.452792	-0.405949	-0.131986	-0.196852	-0.20027	-0.211676	-0.385422	-0.0839455	-0.269903	0.0333368	0.121407	-0.00157813	0.185272	-0.228633	-0.354448	-0.086101	0.101381	-0.0741503	-0.280852	-0.367269	-0.121799	-0.120493	-0.00464732	-0.0333148	0.417116	-0.273256	-0.311218	-0.418748
G239	0.561106	0.15421	0.254841	0.600984	0.565264	0.020581	0.5428	0.353577	0.137928	0.493236	0.273333	-0.0546903	-0.143109	0.179047	-0.0583907	-0.320926	-0.0956346	0.559387	-0.384269	-0.306734	0.387099	-0.258998	0.287905	0.352227	-0.0186001	0.414982	0.415918	0.370599	0.471251	0.25323	-0.0163473	0.0270894	0.00682404	-0.182116	0.517876	0.559757	0.307214	-0.0729966	-0.0880596	0.304448	0.250226	0.162242	0.396894	0.317204	0.0669671	-0.199312	-0.165899	0.516788	0.0897356
G240	0.552203	-0.046397	0.301705	0.502574	0.414112	-0.0324659	0.548525	0.310173	0.15223	0.405971	0.188168	-0.0247168	-0.0815947	0.286621	0.0271765	-0.210261	-0.163157	0.437925	-0.483245	-0.253774	0.485247	-0.269142	0.367334	0.275672	0.224584	0.295828	0.382462	0.394195	0.347852	0.0721259	0.0784933	0.00521326	0.0138984	-0.17761	0.310521	0.583331	0.306768	0.0195144	-0.119274	0.367464	0.111459	0.169817	0.218968	0.100184	0.0805063	-0.0630925	-0.180527	0.445892	0.171276
G241	-0.314439	-0.135861	-0.130375	-0.276499	-0.235032	0.0621565	-0.0480948	-0.20939	-0.029375	-0.0759352	-0.159642	-0.0413687	0.336424	-0.0549733	0.00257942	0.00262296	0.16037	-0.253883	0.173736	0.182943	-0.158629	0.0881684	-0.232747	-0.0260663	0.110981	-0.152621	-0.326259	-0.169578	-0.0440461	-0.134424	-0.045298	0.0656175	0.155734	0.35706	-0.174672	-0.274017	-0.283248	0.170906	0.0743462	-0.0857958	-0.0404763	-0.131638	-0.269773	-0.20643	-0.201141	0.075674	-0.0150738	-0.284553	-0.208193
G242	-0.175281	-0.268597	-0.198398	-0.0835537	-0.279612	-0.183008	-0.335379	-0.248006	-0.31703	-0.0855346	-0.264376	-0.187384	-0.102187	-0.0898227	0.110698	0.15519	-0.268293	-0.15532	0.458604	0.565111	-0.334552	0.30558	-0.335989	-0.200488	0.0513381	-0.198529	-0.2201	-0.309476	-0.294196	-0.495304	0.0375379	-0.00227468	0.0105898	0.120776	-0.181419	-0.303577	-0.302719	0.32221	-0.238472	-0.367247	-0.0290267	-0.0257398	-0.213635	-0.371687	0.281179	0.348549	-0.252228	-0.250552	-0.0647033
G243	-0.31137	-0.00802124	-0.219403	-0.117728	-0.368488	-0.0969188	-0.231985	-0.25471	-0.0779595	-0.227174	-0.230615	-0.202817	-0.226761	-0.258541	0.0205592	0.224606	-0.00105571	-0.13425	0.250683	0.206452	-0.264766	0.514089	0.00321067	-0.191041	-0.0372329	-0.173997	-0.195198	-0.207453	-0.244349	-0.128503	-0.0551368	-0.103471	-0.247244	-0.0883643	-0.213831	-0.195808	-0.0886695	-0.0421306	-0.133444	-0.0816817	-0.212699	-0.135752	-0.148203	-0.0866447	0.0667276	-0.0541897	-0.231375	-0.130571	-0.197288
G244	-0.0102197	-0.261545	-0.000642135	-0.01207	-0.00360249	-0.0430666	0.0832925	0.0385607	0.0749992	0.105626	-0.133314	-0.0580207	0.157497	0.0442855	-0.000467997	-0.155603	-0.0641373	-0.0693397	0.108173	0.0967882	-0.0354698	0.129309	0.0113299	0.108412	0.257453	-0.0238896	0.0249127	0.040411	-0.00667167	-0.152948	-0.0947644	-0.0630054	-0.127676	0.107933	-0.0764358	0.0106769	0.124172	0.171276	-0.0613729	0.140345	-0.167771	0.186252	-0.197636	-0.114637	0.0794397	0.0708634	-0.167924	-0.100271	0.102252
Note: G1-G244 denote the 244 genes related to ASD
[truncated: 195 more columns]
