# Supplementary material for: Network Structure Analysis Identifying Key Genes of Autism and Its Mechanism
Source: Comput Math Methods Med. 2020 Mar 23;2020:3753080. doi: 10.1155/2020/3753080 (PMC7125446; doi:10.1155/2020/3753080)
Supplement: Supplementary Materials — Data1: sheet1 is about 244 genes related to ASD; sheet2 is about the expression profile of 244 genes related to ASD in the control group (C); sheet3 is about the expression profile of 244 genes related to ASD in the experimental group (E). Data2: sheet1 and sheet2 are the Spearman correlation coefficients of C and E, respectively. Data3: the Spearman correlation networks of C at different threshold (0.1–1) (sheet1–sheet10). Data4: the Spearman correlation networks of E at different threshold (0.1–1) (sheet1–sheet10). Data5: comparison of node degree of C and E 's correlation networks under different thresholds (sheet1–sheet4). Data6: analysis of structural key genes (sheet1–sheet5). [file 3753080.f1.zip › 3753080.f1/ProcessedData/Data3-C spearman correlation network at some threshold.xlsx]

## Sheet: Location0.1
1	2	0.129441
1	3	0.34533
1	4	0.537134
1	5	0.580952
1	7	0.592308
1	8	0.426603
1	9	0.288782
1	10	0.515888
1	11	0.573214
1	12	0.22935
1	14	0.429579
1	18	0.56685
1	19	0.371566
1	20	0.416026
1	21	0.462179
1	22	0.323764
1	23	0.425778
1	24	0.577335
1	25	0.213782
1	26	0.529258
1	27	0.583608
1	28	0.392308
1	29	0.469322
1	30	0.415614
1	32	0.250595
1	33	0.120559
1	35	0.381666
1	36	0.656548
1	37	0.278984
1	40	0.381548
1	41	0.160211
1	42	0.412775
1	43	0.510989
1	44	0.334661
1	46	0.127198
1	48	0.357097
1	50	0.532005
1	51	0.196291
1	52	0.134707
1	53	0.180403
1	57	0.137088
1	58	0.638416
1	60	0.55641
1	61	0.405815
1	62	0.264881
1	63	0.221154
1	64	0.129487
1	65	0.220971
1	66	0.42587
1	67	0.268269
1	69	0.192399
1	70	0.535577
1	71	0.537225
1	72	0.290201
1	73	0.339148
1	74	0.43141
1	75	0.456639
1	76	0.192125
1	78	0.419505
1	79	0.172161
1	80	0.508013
1	81	0.560073
1	82	0.420971
1	83	0.500916
1	85	0.188645
1	86	0.362683
1	88	0.187821
1	89	0.342628
1	90	0.409478
1	91	0.298535
1	92	0.425549
1	93	0.439377
1	94	0.40609
1	96	0.150137
1	97	0.216117
1	98	0.136355
1	100	0.311813
1	101	0.518727
1	103	0.535394
1	104	0.265888
1	105	0.430128
1	109	0.340888
1	110	0.47033
1	111	0.162134
1	112	0.374981
1	113	0.531462
1	114	0.53576
1	115	0.333837
1	116	0.502976
1	117	0.342537
1	118	0.374038
1	119	0.171658
1	120	0.249725
1	121	0.551511
1	122	0.317311
1	123	0.310256
1	124	0.330174
1	126	0.662821
1	127	0.350458
1	128	0.467537
1	129	0.449771
1	131	0.424313
1	133	0.185348
1	134	0.49043
1	135	0.190293
1	136	0.137982
1	137	0.490568
1	138	0.349542
1	139	0.294277
1	140	0.25206
1	141	0.548672
1	142	0.123168
1	143	0.194643
1	144	0.589744
1	145	0.409066
1	146	0.438004
1	147	0.54707
1	148	0.546474
1	149	0.280128
1	150	0.495971
1	151	0.28402
1	152	0.170009
1	153	0.493773
1	154	0.353434
1	156	0.487866
1	157	0.635394
1	158	0.231136
1	159	0.228892
1	161	0.291163
1	162	0.242491
1	163	0.520696
1	165	0.553022
1	166	0.348581
1	168	0.18228
1	169	0.144093
1	170	0.338965
1	171	0.55119
1	172	0.547665
1	173	0.40522
1	174	0.451282
1	175	0.574405
1	176	0.493636
1	177	0.426877
1	178	0.17674
1	179	0.252564
1	180	0.215614
1	181	0.481273
1	182	0.125412
1	183	0.290751
1	184	0.380357
1	185	0.359753
1	186	0.398993
1	188	0.496886
1	189	0.172802
1	190	0.368452
1	191	0.36369
1	193	0.404991
1	194	0.193498
1	195	0.417949
1	196	0.257143
1	197	0.441987
1	198	0.201007
1	199	0.411447
1	200	0.511676
1	201	0.393892
1	202	0.200229
1	203	0.179441
1	204	0.372165
1	206	0.24533
1	207	0.535073
1	208	0.453342
1	209	0.533104
1	210	0.103022
1	211	0.135302
1	212	0.15348
1	213	0.403159
1	215	0.484661
1	216	0.344322
1	220	0.226603
1	221	0.15989
1	223	0.156227
1	225	0.376969
1	226	0.608471
1	229	0.185211
1	230	0.297573
1	231	0.432738
1	232	0.109203
1	233	0.468727
1	234	0.109982
1	235	0.437408
1	236	0.381575
1	237	0.465156
1	239	0.470879
1	240	0.410165
1	241	0.204899
1	242	0.230403
2	4	0.195009
2	6	0.232921
2	10	0.219689
2	14	0.126511
2	17	0.414744
2	21	0.212683
2	24	0.159249
2	25	0.327885
2	30	0.148443
2	31	0.19011
2	32	0.303114
2	33	0.177152
2	34	0.106777
2	39	0.155861
2	42	0.153892
2	44	0.113462
2	45	0.1038
2	47	0.154762
2	48	0.123489
2	50	0.1087
2	54	0.14478
2	56	0.134066
2	57	0.198718
2	60	0.125641
2	61	0.177015
2	63	0.229075
2	64	0.248993
2	65	0.196474
2	72	0.259432
2	74	0.210714
2	75	0.120284
2	77	0.170604
2	79	0.15435
2	80	0.126465
2	83	0.178617
2	84	0.106044
2	87	0.179716
2	88	0.118681
2	90	0.162866
2	91	0.130357
2	98	0.126969
2	99	0.108426
2	101	0.12326
2	102	0.102473
2	108	0.160256
2	109	0.11337
2	113	0.102313
2	114	0.155082
2	115	0.354441
2	116	0.141438
2	117	0.33054
2	118	0.174496
2	121	0.18837
2	126	0.167491
2	132	0.201374
2	133	0.103388
2	137	0.113828
2	138	0.11978
2	140	0.125229
2	141	0.251374
2	142	0.200504
2	144	0.187866
2	145	0.271703
2	146	0.126145
2	152	0.130632
2	153	0.195009
2	156	0.101282
2	158	0.126832
2	160	0.162088
2	162	0.182051
2	166	0.100458
2	172	0.168819
2	173	0.128114
2	175	0.109432
2	183	0.126603
2	188	0.124496
2	190	0.168315
2	193	0.125412
2	194	0.110806
2	196	0.269002
2	198	0.141529
2	199	0.299496
2	200	0.194231
2	204	0.176948
2	206	0.233471
2	211	0.14478
2	212	0.154121
2	218	0.134936
2	219	0.119918
2	220	0.181777
2	223	0.14185
2	224	0.174313
2	225	0.115339
2	228	0.116438
2	230	0.12587
2	231	0.102793
2	232	0.226099
2	233	0.121383
2	235	0.101419
2	237	0.105723
2	238	0.223397
2	239	0.264423
2	240	0.124451
2	242	0.221291
2	244	0.201648
3	5	0.426419
3	7	0.546429
3	8	0.242857
3	9	0.1375
3	10	0.276419
3	11	0.20641
3	12	0.263874
3	14	0.286722
3	17	0.157921
3	18	0.240751
3	19	0.291941
3	20	0.381502
3	21	0.178938
3	22	0.284249
3	23	0.439789
3	24	0.500092
3	25	0.158059
3	26	0.39359
3	27	0.417216
3	28	0.20261
3	29	0.37761
3	30	0.314377
3	31	0.196932
3	32	0.103571
3	34	0.114789
3	35	0.134777
3	36	0.424588
3	37	0.252839
3	39	0.121886
3	40	0.270284
3	42	0.317491
3	43	0.230266
3	44	0.411401
3	48	0.286081
3	49	0.104075
3	50	0.163462
3	53	0.118956
3	55	0.271932
3	56	0.175
3	58	0.406914
3	60	0.337363
3	61	0.343269
3	62	0.177106
3	63	0.107555
3	64	0.260943
3	65	0.292995
3	66	0.486172
3	68	0.278159
3	70	0.3212
3	71	0.313462
3	72	0.104853
3	73	0.184524
3	74	0.457051
3	75	0.374176
3	76	0.475412
3	77	0.125824
3	78	0.232509
3	80	0.332005
3	81	0.418681
3	82	0.20641
3	83	0.47207
3	86	0.199451
3	87	0.171291
3	89	0.216667
3	90	0.300687
3	91	0.345009
3	92	0.226419
3	93	0.220055
3	94	0.30989
3	97	0.123352
3	100	0.173077
3	101	0.39098
3	103	0.416529
3	104	0.15119
3	105	0.225229
3	106	0.174222
3	108	0.133974
3	109	0.180861
3	110	0.38489
3	111	0.151969
3	112	0.307352
3	113	0.174178
3	114	0.517308
3	115	0.131639
3	116	0.31978
3	117	0.275412
3	118	0.257601
3	119	0.199771
3	120	0.149496
3	121	0.30902
3	122	0.274957
3	124	0.266163
3	126	0.36717
3	127	0.411676
3	128	0.449222
3	129	0.366758
3	130	0.180128
3	131	0.141575
3	134	0.494872
3	136	0.184274
3	137	0.154899
3	138	0.263416
3	139	0.301374
3	140	0.189332
3	141	0.230815
3	142	0.242674
3	144	0.447619
3	145	0.274542
3	146	0.367857
3	147	0.437225
3	148	0.283333
3	149	0.426648
3	150	0.288828
3	151	0.33109
3	152	0.308608
3	153	0.133013
3	154	0.342582
3	156	0.340293
3	157	0.493452
3	158	0.179762
3	159	0.124908
3	160	0.169963
3	161	0.116896
3	163	0.338507
3	165	0.265934
3	166	0.440751
3	167	0.188278
3	170	0.497436
3	171	0.265476
3	172	0.336584
3	173	0.343223
3	174	0.274634
3	175	0.421429
3	176	0.295604
3	177	0.3625
3	179	0.195879
3	180	0.257463
3	181	0.338965
3	183	0.127289
3	184	0.207372
3	185	0.233333
3	186	0.203159
3	187	0.190751
3	188	0.371016
3	189	0.228984
3	190	0.266804
3	193	0.197207
3	194	0.293544
3	195	0.340568
3	196	0.101694
3	197	0.117399
3	198	0.155769
3	199	0.339789
3	200	0.346108
3	201	0.180771
3	203	0.112088
3	205	0.160119
3	206	0.287775
3	207	0.352701
3	208	0.464973
3	209	0.259661
3	212	0.228297
3	213	0.157372
3	215	0.345879
3	216	0.258562
3	217	0.300321
3	219	0.134158
3	222	0.182601
3	223	0.128571
3	224	0.225046
3	225	0.149451
3	226	0.559249
3	227	0.39478
3	229	0.206593
3	230	0.115842
3	231	0.379121
3	233	0.212592
3	235	0.489286
3	236	0.213143
3	237	0.409112
3	239	0.301465
3	240	0.397802
3	241	0.307372
3	242	0.286355
4	5	0.577839
4	7	0.507784
4	8	0.31456
4	9	0.221795
4	10	0.594918
4	11	0.45696
4	14	0.371062
4	15	0.16891
4	16	0.110668
4	18	0.745467
4	19	0.597024
4	20	0.243269
4	21	0.656685
4	22	0.487179
4	23	0.334661
4	24	0.451603
4	25	0.140156
4	26	0.366621
4	27	0.472665
4	28	0.618498
4	29	0.457875
4	30	0.268361
4	33	0.194963
4	35	0.624824
4	36	0.608791
4	37	0.269734
4	40	0.113049
4	41	0.586722
4	42	0.214286
4	43	0.526694
4	44	0.383837
4	46	0.17381
4	48	0.683974
4	49	0.102839
4	50	0.27207
4	51	0.543681
4	52	0.29794
4	54	0.216392
4	55	0.22413
4	57	0.31076
4	58	0.502793
4	60	0.546291
4	61	0.310531
4	63	0.449908
4	65	0.216667
4	66	0.139881
4	70	0.56337
4	71	0.544918
4	72	0.323077
4	73	0.140797
4	74	0.129441
4	75	0.500778
4	77	0.14185
4	78	0.524451
4	80	0.585302
4	81	0.62381
4	82	0.466346
4	83	0.380495
4	85	0.291896
4	87	0.219322
4	88	0.329396
4	90	0.340247
4	91	0.325366
4	92	0.564057
4	93	0.341209
4	94	0.300366
4	96	0.232097
4	97	0.249405
4	98	0.122985
4	100	0.453114
4	101	0.583333
4	102	0.352015
4	103	0.169505
4	104	0.352381
4	105	0.661538
4	106	0.110256
4	107	0.12033
4	108	0.197482
4	109	0.237775
4	110	0.474084
4	111	0.223168
4	112	0.139722
4	113	0.662393
4	114	0.306136
4	116	0.581685
4	117	0.159432
4	118	0.289973
4	120	0.224176
4	121	0.698718
4	122	0.348058
4	123	0.357555
4	124	0.291804
4	125	0.307647
4	126	0.50957
4	127	0.137546
4	128	0.298168
4	129	0.261493
4	130	0.155632
4	131	0.619643
4	132	0.17065
4	133	0.134478
4	134	0.394734
4	135	0.212683
4	137	0.447711
4	138	0.507921
4	139	0.346612
4	140	0.314973
4	141	0.628617
4	143	0.402244
4	144	0.53196
4	145	0.308013
4	146	0.215705
4	147	0.247161
4	148	0.371062
4	149	0.233791
4	150	0.367582
4	151	0.107967
4	153	0.281548
4	154	0.50467
4	155	0.209707
4	156	0.542857
4	157	0.575366
4	158	0.531273
4	159	0.292995
4	160	0.174222
4	161	0.488278
4	162	0.337866
4	163	0.630174
4	164	0.127198
4	165	0.580907
4	167	0.23109
4	168	0.251786
4	169	0.321795
4	171	0.567033
4	172	0.722161
4	173	0.346612
4	175	0.590156
4	176	0.352656
4	177	0.257051
4	178	0.389332
4	179	0.117491
4	181	0.454899
4	182	0.121612
4	184	0.499679
4	185	0.501282
4	186	0.249863
4	188	0.519963
4	189	0.145925
4	192	0.284799
4	193	0.584478
4	194	0.104304
4	195	0.619963
4	196	0.522299
4	197	0.633883
4	199	0.441712
4	200	0.611218
4	201	0.603578
4	202	0.646795
4	203	0.213828
4	204	0.229856
4	207	0.66891
4	209	0.392811
4	210	0.168361
4	213	0.519597
4	214	0.241163
4	215	0.427656
4	216	0.474542
4	217	0.185714
4	219	0.228342
4	220	0.486081
4	221	0.228068
4	224	0.201694
4	225	0.407051
4	226	0.26946
4	227	0.289194
4	228	0.132234
4	230	0.566484
4	232	0.142353
4	233	0.712042
4	235	0.212088
4	236	0.115157
4	237	0.306822
4	238	0.150046
4	239	0.533883
4	240	0.364744
4	241	0.129396
4	242	0.358654
4	243	0.195101
4	244	0.270192
5	7	0.661035
5	8	0.337546
5	9	0.497299
5	10	0.519689
5	11	0.607463
5	12	0.197711
5	14	0.425
5	17	0.181273
5	18	0.497894
5	19	0.531319
5	20	0.381777
5	21	0.47413
5	22	0.437225
5	23	0.491621
5	24	0.634524
5	26	0.454533
5	27	0.607555
5	28	0.377701
5	29	0.645833
5	30	0.32239
5	31	0.286355
5	34	0.170559
5	35	0.380911
5	36	0.681822
5	37	0.481136
5	38	0.175916
5	40	0.297573
5	42	0.429808
5	43	0.529258
5	44	0.332463
5	45	0.241209
5	46	0.16424
5	47	0.147985
5	48	0.485806
5	50	0.375412
5	51	0.192811
5	52	0.246658
5	53	0.202198
5	54	0.228022
5	56	0.203159
5	57	0.104716
5	58	0.611218
5	60	0.483608
5	61	0.579533
5	63	0.279762
5	65	0.377335
5	66	0.248397
5	67	0.155357
5	68	0.183883
5	70	0.657097
5	71	0.737866
5	72	0.230586
5	73	0.374679
5	74	0.463233
5	75	0.629167
5	76	0.107784
5	77	0.220467
5	78	0.530861
5	80	0.62239
5	81	0.438462
5	82	0.569139
5	83	0.632005
5	84	0.147802
5	85	0.24826
5	86	0.23631
5	87	0.115842
5	88	0.218086
5	89	0.247665
5	90	0.661447
5	91	0.489332
5	92	0.414332
5	93	0.424679
5	94	0.29011
5	95	0.139057
5	96	0.242308
5	97	0.377701
5	98	0.210256
5	100	0.410348
5	101	0.492903
5	103	0.530037
5	104	0.197619
5	105	0.369139
5	106	0.244551
5	109	0.32706
5	110	0.38663
5	111	0.275549
5	112	0.361016
5	113	0.485537
5	114	0.5913
5	115	0.171474
5	116	0.372711
5	117	0.186493
5	118	0.383288
5	119	0.197115
5	120	0.243315
5	121	0.535714
5	122	0.436978
5	123	0.287546
5	124	0.486676
5	126	0.656822
5	127	0.442903
5	128	0.538278
5	129	0.477701
5	130	0.269277
5	131	0.516621
5	133	0.199725
5	134	0.607738
5	135	0.102793
5	136	0.308451
5	137	0.491255
5	138	0.502106
5	139	0.389515
5	140	0.378892
5	141	0.522894
5	142	0.139515
5	143	0.430632
5	144	0.589469
5	145	0.352976
5	146	0.35696
5	147	0.591804
5	148	0.454716
5	149	0.489652
5	150	0.594734
5	151	0.435348
5	152	0.184341
5	153	0.418269
5	154	0.513553
5	155	0.146886
5	156	0.719963
5	157	0.6087
5	158	0.34098
5	159	0.347802
5	161	0.333104
5	162	0.261447
5	163	0.616804
5	165	0.563507
5	166	0.445238
5	168	0.14881
5	169	0.191575
5	170	0.336218
5	171	0.529487
5	172	0.589057
5	173	0.258196
5	174	0.262866
5	175	0.70783
5	176	0.333242
5	177	0.476786
5	178	0.224176
5	179	0.413278
5	180	0.191026
5	181	0.528755
5	184	0.607051
5	185	0.364377
5	186	0.211584
5	187	0.161035
5	188	0.483883
5	189	0.367628
5	190	0.429029
5	191	0.270513
5	193	0.48196
5	194	0.340522
5	195	0.464744
5	196	0.329808
5	197	0.461859
5	198	0.127289
5	199	0.427793
5	200	0.503984
5	201	0.424043
5	202	0.198168
5	203	0.226465
5	204	0.130656
5	207	0.707326
5	208	0.459478
5	209	0.458654
5	210	0.115888
5	211	0.135485
5	212	0.114789
5	213	0.470101
5	214	0.137958
5	215	0.546612
5	216	0.373443
5	217	0.253159
5	218	0.248306
5	219	0.232372
5	220	0.113141
5	221	0.141163
5	224	0.155907
5	225	0.392903
5	226	0.56543
5	227	0.362729
5	229	0.125641
5	230	0.383471
5	231	0.429625
5	233	0.408471
5	234	0.127518
5	235	0.531731
5	236	0.506599
5	237	0.620147
5	238	0.192216
5	239	0.44707
5	240	0.386722
5	241	0.283333
5	242	0.388416
5	243	0.122848
6	10	0.171337
6	12	0.131639
6	13	0.157005
6	14	0.242491
6	16	0.286126
6	17	0.280632
6	21	0.170788
6	22	0.227335
6	25	0.176236
6	26	0.174313
6	29	0.137637
6	30	0.148443
6	32	0.195101
6	33	0.338507
6	38	0.128159
6	39	0.224542
6	40	0.14217
6	42	0.125183
6	44	0.107326
6	45	0.105449
6	46	0.140064
6	47	0.321383
6	48	0.180723
6	49	0.112637
6	52	0.144734
6	54	0.461767
6	60	0.158196
6	62	0.211767
6	63	0.247985
6	64	0.1837
6	65	0.275137
6	66	0.120879
6	68	0.290842
6	69	0.20641
6	72	0.196291
6	73	0.153984
6	74	0.1413
6	75	0.152335
6	77	0.308242
6	79	0.178571
6	80	0.141346
6	85	0.105082
6	86	0.16131
6	92	0.181181
6	94	0.328068
6	97	0.256181
6	98	0.165797
6	101	0.274267
6	102	0.149451
6	103	0.100366
6	104	0.198947
6	107	0.184203
6	108	0.108059
6	110	0.150504
6	111	0.23631
6	113	0.141416
6	115	0.186355
6	116	0.131548
6	117	0.260989
6	119	0.278617
6	121	0.171291
6	124	0.127381
6	125	0.134753
6	128	0.141438
6	130	0.114515
6	134	0.157601
6	135	0.296841
6	136	0.14817
6	137	0.169185
6	142	0.230174
6	145	0.159295
6	146	0.194826
6	149	0.388324
6	151	0.101145
6	152	0.163141
6	159	0.12326
6	163	0.142399
6	164	0.228571
6	166	0.158379
6	167	0.153022
6	172	0.233929
6	178	0.113095
6	179	0.113462
6	180	0.146703
6	182	0.316026
6	185	0.343681
6	186	0.141438
6	188	0.107692
6	189	0.16163
6	192	0.14446
6	193	0.150412
6	194	0.365064
6	196	0.129167
6	198	0.239286
6	199	0.237821
6	202	0.281456
6	204	0.143523
6	206	0.239286
6	207	0.129991
6	209	0.188324
6	210	0.122253
6	211	0.123535
6	213	0.14881
6	217	0.393269
6	218	0.29881
6	222	0.130403
6	225	0.260027
6	227	0.264881
6	229	0.240888
6	230	0.148535
6	231	0.113462
6	232	0.299084
6	235	0.255495
6	241	0.117353
6	242	0.300183
6	243	0.284249
6	244	0.212042
7	8	0.334295
7	9	0.37065
7	10	0.547024
7	11	0.466758
7	12	0.106731
7	13	0.228205
7	14	0.382005
7	15	0.131593
7	16	0.21337
7	18	0.495101
7	19	0.596108
7	20	0.365659
7	21	0.64533
7	22	0.382647
7	23	0.449084
7	24	0.699634
7	25	0.186767
7	26	0.608013
7	27	0.564881
7	28	0.248443
7	29	0.696337
7	30	0.379258
7	31	0.281822
7	35	0.367449
7	36	0.710531
7	37	0.513095
7	40	0.440064
7	42	0.516575
7	43	0.485623
7	44	0.591117
7	45	0.187958
7	47	0.102793
7	48	0.460211
7	50	0.324405
7	51	0.268956
7	53	0.166117
7	54	0.194093
7	55	0.2038
7	56	0.128388
7	58	0.617628
7	59	0.235119
7	60	0.446154
7	61	0.578755
7	62	0.175733
7	63	0.254625
7	64	0.243956
7	65	0.470101
7	66	0.429121
7	67	0.148077
7	68	0.346886
7	70	0.605357
7	71	0.692857
7	72	0.212866
7	73	0.408379
7	74	0.604716
7	75	0.497436
7	76	0.259249
7	77	0.133654
7	78	0.502885
7	80	0.673718
7	81	0.549405
7	82	0.543727
7	83	0.554899
7	84	0.102015
7	86	0.218864
7	87	0.131227
7	88	0.1212
7	89	0.391346
7	90	0.605082
7	91	0.439332
7	92	0.424817
7	93	0.394139
7	94	0.474634
7	97	0.26543
7	98	0.162363
7	99	0.186724
7	100	0.333516
7	101	0.63402
7	103	0.598718
7	104	0.233379
7	105	0.436355
7	109	0.352381
7	110	0.390201
7	111	0.182601
7	112	0.384986
7	113	0.485582
7	114	0.619826
7	115	0.16685
7	116	0.403846
7	117	0.274725
7	118	0.410119
7	119	0.253022
7	120	0.161905
7	121	0.575733
7	122	0.325713
7	123	0.360668
7	124	0.53956
7	126	0.646108
7	127	0.628846
7	128	0.505952
7	129	0.362866
7	130	0.268636
7	131	0.301282
7	133	0.233516
7	134	0.721749
7	135	0.15174
7	136	0.176444
7	137	0.410485
7	138	0.429487
7	139	0.45522
7	140	0.35609
7	141	0.501007
7	142	0.224588
7	143	0.227885
7	144	0.55609
7	145	0.465201
7	146	0.44707
7	147	0.681685
7	148	0.505723
7	149	0.521154
7	150	0.660806
7	151	0.504853
7	152	0.27935
7	153	0.421291
7	154	0.386538
7	156	0.705769
7	157	0.579441
7	158	0.350229
7	159	0.344826
7	160	0.236126
7	161	0.326099
7	162	0.287042
7	163	0.682692
7	164	0.189286
7	165	0.53489
7	166	0.50119
7	168	0.108013
7	169	0.102152
7	170	0.338965
7	171	0.506685
7	172	0.605952
7	173	0.386584
7	174	0.325183
7	175	0.686859
7	176	0.394368
7	177	0.483333
7	178	0.116575
7	179	0.498077
7	180	0.34391
7	181	0.505723
7	182	0.107601
7	183	0.237866
7	184	0.591804
7	185	0.497711
7	186	0.396154
7	188	0.646612
7	189	0.422848
7	190	0.457463
7	191	0.375092
7	193	0.55815
7	194	0.359386
7	195	0.464011
7	196	0.208104
7	197	0.408929
7	198	0.123214
7	199	0.411722
7	200	0.526877
7	201	0.350118
7	204	0.220653
7	206	0.20641
7	207	0.691667
7	208	0.539423
7	209	0.454167
7	210	0.113278
7	211	0.219689
7	212	0.220925
7	213	0.462042
7	215	0.507189
7	216	0.527793
7	217	0.341941
7	219	0.108333
7	221	0.116758
7	222	0.236126
7	223	0.117079
7	225	0.385302
7	226	0.646566
7	227	0.492949
7	229	0.197207
7	230	0.413049
7	231	0.548077
7	233	0.476877
7	235	0.674084
7	236	0.445518
7	237	0.48544
7	239	0.472161
7	240	0.357189
7	241	0.272756
7	242	0.34359
7	244	0.146841
8	9	0.120604
8	10	0.276374
8	11	0.359341
8	14	0.120788
8	17	0.127335
8	18	0.275778
8	19	0.395879
8	20	0.269185
8	21	0.355998
8	22	0.333379
8	23	0.485027
8	24	0.377106
8	25	0.157601
8	26	0.227473
8	27	0.381548
8	28	0.286767
8	29	0.25815
8	30	0.306639
8	35	0.188509
8	36	0.499038
8	37	0.302152
8	38	0.171383
8	40	0.325092
8	42	0.263828
8	43	0.295696
8	44	0.239469
8	48	0.256044
8	50	0.346886
8	51	0.121703
8	52	0.160485
8	53	0.191987
8	54	0.127976
8	55	0.134799
8	56	0.151328
8	57	0.240888
8	58	0.537408
8	60	0.435714
8	61	0.3087
8	63	0.12326
8	64	0.116026
8	65	0.304625
8	66	0.25348
8	67	0.22294
8	68	0.140385
8	69	0.110027
8	70	0.303388
8	71	0.298306
8	72	0.26598
8	74	0.290156
8	75	0.289881
8	76	0.276511
8	78	0.227244
8	80	0.397802
8	81	0.382555
8	82	0.154533
8	83	0.35902
8	85	0.234799
8	86	0.184341
8	89	0.382143
8	90	0.272802
8	91	0.328342
8	92	0.266346
8	93	0.284524
8	94	0.137088
8	95	0.122619
8	96	0.195742
8	97	0.258929
8	98	0.173306
8	101	0.359341
8	102	0.236355
8	103	0.429579
8	104	0.325046
8	105	0.360577
8	106	0.119872
8	109	0.241804
8	110	0.34359
8	111	0.255815
8	112	0.3052
8	113	0.31129
8	114	0.405632
8	115	0.174908
8	116	0.247894
8	118	0.398352
8	119	0.215568
8	120	0.19652
8	121	0.373077
8	122	0.167607
8	123	0.271474
8	124	0.435119
8	126	0.351328
8	128	0.147711
8	129	0.26337
8	131	0.175962
8	132	0.226145
8	133	0.231822
8	134	0.372207
8	135	0.204533
8	136	0.317746
8	137	0.308104
8	138	0.248031
8	139	0.148855
8	140	0.296932
8	141	0.222207
8	142	0.140201
8	143	0.114423
8	144	0.45206
8	145	0.276511
8	146	0.369826
8	147	0.286401
8	148	0.429625
8	149	0.185485
8	150	0.281868
8	151	0.227656
8	152	0.124725
8	153	0.54217
8	154	0.345559
8	155	0.257189
8	156	0.291484
8	157	0.491896
8	158	0.442995
8	159	0.120742
8	161	0.358288
8	162	0.266758
8	163	0.2788
8	164	0.199084
8	165	0.271154
8	166	0.248443
8	167	0.234524
8	168	0.231319
8	169	0.165156
8	170	0.456456
8	171	0.500275
8	172	0.200687
8	173	0.32587
8	174	0.258654
8	175	0.406136
8	176	0.430678
8	177	0.381364
8	178	0.203388
8	181	0.488324
8	183	0.249725
8	185	0.166438
8	186	0.171795
8	187	0.157143
8	188	0.478342
8	189	0.136218
8	190	0.237454
8	191	0.184615
8	192	0.306777
8	193	0.238919
8	194	0.183333
8	195	0.278388
8	197	0.283379
8	199	0.237317
8	200	0.39011
8	201	0.320288
8	203	0.257967
8	204	0.270791
8	206	0.226877
8	207	0.422711
8	208	0.198352
8	209	0.343636
8	211	0.134295
8	212	0.142903
8	213	0.33054
8	214	0.159341
8	215	0.370238
8	216	0.277015
8	220	0.260394
8	221	0.206731
8	222	0.225229
8	224	0.143269
8	225	0.128342
8	226	0.584707
8	227	0.327473
8	229	0.138416
8	230	0.134615
8	231	0.398489
8	233	0.243864
8	234	0.180861
8	235	0.257784
8	236	0.178367
8	237	0.333745
8	238	0.225412
8	239	0.278159
8	240	0.239515
8	241	0.213507
8	242	0.142949
8	243	0.174405
9	10	0.305907
9	11	0.322207
9	12	0.136264
9	14	0.174542
9	16	0.10206
9	18	0.148901
9	19	0.248443
9	20	0.222573
9	21	0.200412
9	23	0.105907
9	24	0.31044
9	26	0.368315
9	27	0.387363
9	28	0.128617
9	29	0.31891
9	30	0.260943
9	31	0.223214
9	34	0.173397
9	35	0.206298
9	36	0.270513
9	37	0.501099
9	38	0.196703
9	41	0.103526
9	42	0.309478
9	43	0.264377
9	45	0.131685
9	46	0.218498
9	47	0.284661
9	48	0.182647
9	49	0.188782
9	50	0.367308
9	52	0.106181
9	55	0.173031
9	56	0.19794
9	57	0.114881
9	58	0.341667
9	61	0.271062
9	63	0.240568
9	64	0.162134
9	65	0.122619
9	66	0.412683
9	67	0.186218
9	68	0.240751
9	70	0.509478
9	71	0.360165
9	73	0.125778
9	74	0.203984
9	75	0.526786
9	77	0.304029
9	78	0.365156
9	80	0.265659
9	81	0.121383
9	82	0.343727
9	83	0.272344
9	84	0.343864
9	85	0.20293
9	86	0.217445
9	89	0.109661
9	90	0.358333
9	91	0.161447
9	92	0.238233
9	93	0.257555
9	94	0.325641
9	95	0.203571
9	96	0.192399
9	97	0.313049
9	98	0.26598
9	100	0.17152
9	101	0.321749
9	103	0.305998
9	105	0.243727
9	106	0.244689
9	109	0.391896
9	110	0.122665
9	111	0.235211
9	112	0.123284
9	113	0.12404
9	114	0.373535
9	116	0.146841
9	118	0.124176
9	120	0.275366
9	121	0.203526
9	122	0.146156
9	124	0.361538
9	126	0.311996
9	127	0.268956
9	128	0.374634
9	129	0.212821
9	130	0.24565
9	131	0.298352
9	133	0.15957
9	134	0.282509
9	135	0.196886
9	137	0.251511
9	138	0.283425
9	139	0.147894
9	140	0.174496
9	141	0.170055
9	142	0.198443
9	143	0.189606
9	144	0.15783
9	145	0.370513
9	146	0.123306
9	147	0.393132
9	148	0.194826
9	149	0.332463
9	150	0.398626
9	151	0.237088
9	153	0.371795
9	154	0.188965
9	155	0.219002
9	156	0.408288
9	157	0.229167
9	158	0.238278
9	159	0.126145
9	160	0.108379
9	161	0.114881
9	162	0.10902
9	163	0.388553
9	164	0.199542
9	165	0.264057
9	166	0.351007
9	167	0.1587
9	169	0.115614
9	171	0.111264
9	172	0.276694
9	175	0.296932
9	176	0.167766
9	177	0.256548
9	179	0.238874
9	180	0.113599
9	181	0.113645
9	183	0.122848
9	184	0.3962
9	185	0.250366
9	187	0.173855
9	188	0.224634
9	189	0.231639
9	190	0.318407
9	191	0.332692
9	193	0.315888
9	194	0.276969
9	195	0.237042
9	196	0.251236
9	197	0.273901
9	199	0.129396
9	201	0.154695
9	203	0.152152
9	204	0.138166
9	205	0.14011
9	207	0.414103
9	208	0.358516
9	209	0.212042
9	211	0.271337
9	213	0.15
9	214	0.195833
9	215	0.483288
9	216	0.106868
9	217	0.162958
9	218	0.168407
9	220	0.127244
9	221	0.137821
9	222	0.105586
9	223	0.222115
9	224	0.11685
9	225	0.185302
9	226	0.283425
9	227	0.274679
9	230	0.25902
9	231	0.328434
9	232	0.146016
9	233	0.156456
9	235	0.354487
9	236	0.442565
9	237	0.342628
9	238	0.121978
9	239	0.202152
9	240	0.207647
9	241	0.207784
9	242	0.114148
9	244	0.190247
10	11	0.368086
10	12	0.126374
10	13	0.117079
10	14	0.27065
10	18	0.565385
10	19	0.555357
10	20	0.265476
10	21	0.613553
10	22	0.464194
10	23	0.348443
10	24	0.6125
10	26	0.450229
10	27	0.575916
10	28	0.444322
10	29	0.492537
10	30	0.291484
10	35	0.385215
10	36	0.496703
10	37	0.445147
10	38	0.138782
10	40	0.262408
10	41	0.319139
10	42	0.419505
10	43	0.584478
10	44	0.490614
10	45	0.123443
10	46	0.187592
10	48	0.497894
10	50	0.257509
10	51	0.305861
10	52	0.283562
10	53	0.163049
10	54	0.296108
10	57	0.335577
10	58	0.549405
10	59	0.149588
10	60	0.333837
10	61	0.451786
10	63	0.300366
10	64	0.201419
10	65	0.472894
10	66	0.294826
10	68	0.163736
10	70	0.498672
10	71	0.410027
10	72	0.339973
10	73	0.130815
10	74	0.261813
10	75	0.544414
10	78	0.352015
10	79	0.180861
10	80	0.567628
10	81	0.516438
10	82	0.325595
10	83	0.5587
10	85	0.222756
10	86	0.163782
10	87	0.110531
10	89	0.123306
10	90	0.433471
10	91	0.350275
10	92	0.280082
10	93	0.446703
10	94	0.480861
10	96	0.153984
10	97	0.258013
10	98	0.167903
10	100	0.295009
10	101	0.568452
10	102	0.31946
10	103	0.340568
10	104	0.356319
10	105	0.571978
10	109	0.268773
10	110	0.279625
10	111	0.278571
10	112	0.24531
10	113	0.424959
10	114	0.33489
10	115	0.240018
10	116	0.49272
10	117	0.214011
10	118	0.236951
10	119	0.133516
10	120	0.258883
10	121	0.651557
10	122	0.318754
10	123	0.232601
10	124	0.124359
10	125	0.137317
10	126	0.458333
10	127	0.443819
10	128	0.521337
10	129	0.238416
10	130	0.220925
10	131	0.444277
10	133	0.146016
10	134	0.425137
10	135	0.408883
10	137	0.396245
10	138	0.31369
10	139	0.366896
10	140	0.256181
10	141	0.601236
10	142	0.12848
10	143	0.341896
10	144	0.517445
10	145	0.313965
10	146	0.33457
10	147	0.449176
10	148	0.299222
10	149	0.339011
10	150	0.525641
10	151	0.193727
10	152	0.339973
10	153	0.274634
10	154	0.461676
10	155	0.15554
10	156	0.612821
10	157	0.496749
10	158	0.389973
10	159	0.299588
10	161	0.351877
10	162	0.434203
10	163	0.622161
10	165	0.532921
10	166	0.308929
10	168	0.162134
10	169	0.193681
10	170	0.147527
10	171	0.589744
10	172	0.696749
10	173	0.361172
10	175	0.484112
10	176	0.412088
10	177	0.26511
10	178	0.237134
10	179	0.27239
10	180	0.138141
10	181	0.350366
10	182	0.169826
10	184	0.401557
10	185	0.557967
10	186	0.344872
10	188	0.503892
10	189	0.283974
10	190	0.332326
10	191	0.276648
10	193	0.535394
10	194	0.340522
10	195	0.500321
10	196	0.464377
10	197	0.352747
10	199	0.431044
10	200	0.566896
10	201	0.440252
10	202	0.36946
10	203	0.139652
10	204	0.198697
10	207	0.548214
10	208	0.353205
10	209	0.269277
10	211	0.215705
10	213	0.583974
10	214	0.139148
10	215	0.358974
10	216	0.377015
10	217	0.215201
10	218	0.134203
10	219	0.153984
10	220	0.311218
10	221	0.192262
10	223	0.163507
10	225	0.458929
10	226	0.501465
10	227	0.298855
10	229	0.144139
10	230	0.447299
10	231	0.18956
10	233	0.692674
10	234	0.142033
10	235	0.400504
10	236	0.288465
10	237	0.338645
10	239	0.555907
10	240	0.418681
10	241	0.256319
10	242	0.313599
10	243	0.181548
10	244	0.159661
11	14	0.250641
11	17	0.25261
11	18	0.422207
11	19	0.511951
11	20	0.307647
11	21	0.519231
11	22	0.448581
11	23	0.458562
11	24	0.407234
11	26	0.432463
11	27	0.519734
11	28	0.2913
11	29	0.589606
11	30	0.308837
11	31	0.143361
11	32	0.195192
11	33	0.249908
11	34	0.275366
11	35	0.337504
11	36	0.552564
11	37	0.233013
11	40	0.307555
11	41	0.14478
11	42	0.496932
11	43	0.461905
11	44	0.318727
11	45	0.333104
11	46	0.116804
11	47	0.116575
11	48	0.388416
11	49	0.108837
11	50	0.28402
11	51	0.228755
11	52	0.16369
11	53	0.222024
11	54	0.332555
11	57	0.209524
11	58	0.422482
11	60	0.402839
11	61	0.522344
11	63	0.339057
11	65	0.346474
11	66	0.192353
11	67	0.21337
11	70	0.455632
11	71	0.615659
11	72	0.197848
11	73	0.380998
11	74	0.347573
11	75	0.508974
11	77	0.18924
11	78	0.323077
11	79	0.121245
11	80	0.591667
11	81	0.285302
11	82	0.455311
11	83	0.326511
11	85	0.171658
11	86	0.385119
11	87	0.226923
11	89	0.410897
11	90	0.618956
11	91	0.398306
11	92	0.393773
11	93	0.460027
11	94	0.420788
11	96	0.171337
11	97	0.340522
11	98	0.225641
11	99	0.156092
11	100	0.401786
11	101	0.465293
11	102	0.10989
11	103	0.451832
11	104	0.165842
11	105	0.437088
11	109	0.186859
11	110	0.292491
11	111	0.177885
11	112	0.415733
11	113	0.429813
11	114	0.380769
11	115	0.249679
11	116	0.325595
11	117	0.278846
11	118	0.28315
11	119	0.209112
11	120	0.231868
11	121	0.520147
11	122	0.220996
11	124	0.404808
11	126	0.49739
11	127	0.432555
11	128	0.437592
11	129	0.421062
11	130	0.143773
11	131	0.368452
11	133	0.192033
11	134	0.628709
11	135	0.194139
11	136	0.289564
11	137	0.510302
11	138	0.375962
11	139	0.21804
11	140	0.271108
11	141	0.421337
11	143	0.333562
11	144	0.465568
11	145	0.179075
11	146	0.464835
11	147	0.532555
11	148	0.479945
11	149	0.420238
11	150	0.613736
11	151	0.512088
11	152	0.140568
11	153	0.348947
11	154	0.227427
11	155	0.16685
11	156	0.596612
11	157	0.4212
11	158	0.254212
11	159	0.53196
11	160	0.166941
11	161	0.239515
11	162	0.440064
11	163	0.531822
11	165	0.447756
11	166	0.394368
11	167	0.14826
11	169	0.116621
11	170	0.157234
11	171	0.434524
11	172	0.506227
11	173	0.290476
11	174	0.410485
11	175	0.632005
11	176	0.31804
11	177	0.545833
11	178	0.193132
11	179	0.449222
11	180	0.136218
11	181	0.487775
11	182	0.180861
11	183	0.136905
11	184	0.403846
11	185	0.446566
11	186	0.305082
11	188	0.480082
11	189	0.502701
11	190	0.366392
11	191	0.362958
11	192	0.191575
11	193	0.436951
11	194	0.318819
11	195	0.286081
11	196	0.325321
11	197	0.538507
11	198	0.192582
11	199	0.3462
11	200	0.407143
11	201	0.209801
11	202	0.192262
11	203	0.135531
11	204	0.185327
11	206	0.144872
11	207	0.656914
11	208	0.40119
11	209	0.343315
11	213	0.373947
11	215	0.54707
11	216	0.473581
11	217	0.177289
11	219	0.131548
11	220	0.238049
11	224	0.18924
11	225	0.554625
11	226	0.509936
11	227	0.360211
11	228	0.127701
11	229	0.1663
11	230	0.416712
11	231	0.401374
11	233	0.379716
11	234	0.105952
11	235	0.550092
11	236	0.565414
11	237	0.547756
11	238	0.104121
11	239	0.381639
11	240	0.197756
11	241	0.156364
11	242	0.382875
11	243	0.224725
12	13	0.215888
12	14	0.118956
12	16	0.158562
12	17	0.149451
12	20	0.24533
12	22	0.105311
12	23	0.187958
12	26	0.244689
12	27	0.124725
12	29	0.113965
12	33	0.134203
12	36	0.23283
12	38	0.236264
12	39	0.303022
12	41	0.221978
12	43	0.203663
12	46	0.23315
12	49	0.162775
12	51	0.167216
12	53	0.116896
12	54	0.433379
12	55	0.166484
12	57	0.148306
12	58	0.149313
12	61	0.135027
12	62	0.261996
12	63	0.140201
12	65	0.170604
12	66	0.133837
12	67	0.20119
12	69	0.194505
12	71	0.124176
12	72	0.241163
12	73	0.185668
12	77	0.128892
12	78	0.197344
12	79	0.114789
12	81	0.134844
12	83	0.264515
12	85	0.221566
12	86	0.121245
12	88	0.15902
12	90	0.109661
12	91	0.145009
12	93	0.149817
12	95	0.141026
12	96	0.153571
12	97	0.181044
12	98	0.23109
12	102	0.452335
12	103	0.267949
12	104	0.226328
[truncated: 19,206 more rows]

## Sheet: Location0.2
1	3	0.34533
1	4	0.537134
1	5	0.580952
1	7	0.592308
1	8	0.426603
1	9	0.288782
1	10	0.515888
1	11	0.573214
1	12	0.22935
1	14	0.429579
1	18	0.56685
1	19	0.371566
1	20	0.416026
1	21	0.462179
1	22	0.323764
1	23	0.425778
1	24	0.577335
1	25	0.213782
1	26	0.529258
1	27	0.583608
1	28	0.392308
1	29	0.469322
1	30	0.415614
1	32	0.250595
1	35	0.381666
1	36	0.656548
1	37	0.278984
1	40	0.381548
1	42	0.412775
1	43	0.510989
1	44	0.334661
1	48	0.357097
1	50	0.532005
1	58	0.638416
1	60	0.55641
1	61	0.405815
1	62	0.264881
1	63	0.221154
1	65	0.220971
1	66	0.42587
1	67	0.268269
1	70	0.535577
1	71	0.537225
1	72	0.290201
1	73	0.339148
1	74	0.43141
1	75	0.456639
1	78	0.419505
1	80	0.508013
1	81	0.560073
1	82	0.420971
1	83	0.500916
1	86	0.362683
1	89	0.342628
1	90	0.409478
1	91	0.298535
1	92	0.425549
1	93	0.439377
1	94	0.40609
1	97	0.216117
1	100	0.311813
1	101	0.518727
1	103	0.535394
1	104	0.265888
1	105	0.430128
1	109	0.340888
1	110	0.47033
1	112	0.374981
1	113	0.531462
1	114	0.53576
1	115	0.333837
1	116	0.502976
1	117	0.342537
1	118	0.374038
1	120	0.249725
1	121	0.551511
1	122	0.317311
1	123	0.310256
1	124	0.330174
1	126	0.662821
1	127	0.350458
1	128	0.467537
1	129	0.449771
1	131	0.424313
1	134	0.49043
1	137	0.490568
1	138	0.349542
1	139	0.294277
1	140	0.25206
1	141	0.548672
1	144	0.589744
1	145	0.409066
1	146	0.438004
1	147	0.54707
1	148	0.546474
1	149	0.280128
1	150	0.495971
1	151	0.28402
1	153	0.493773
1	154	0.353434
1	156	0.487866
1	157	0.635394
1	158	0.231136
1	159	0.228892
1	161	0.291163
1	162	0.242491
1	163	0.520696
1	165	0.553022
1	166	0.348581
1	170	0.338965
1	171	0.55119
1	172	0.547665
1	173	0.40522
1	174	0.451282
1	175	0.574405
1	176	0.493636
1	177	0.426877
1	179	0.252564
1	180	0.215614
1	181	0.481273
1	183	0.290751
1	184	0.380357
1	185	0.359753
1	186	0.398993
1	188	0.496886
1	190	0.368452
1	191	0.36369
1	193	0.404991
1	195	0.417949
1	196	0.257143
1	197	0.441987
1	198	0.201007
1	199	0.411447
1	200	0.511676
1	201	0.393892
1	202	0.200229
1	204	0.372165
1	206	0.24533
1	207	0.535073
1	208	0.453342
1	209	0.533104
1	213	0.403159
1	215	0.484661
1	216	0.344322
1	220	0.226603
1	225	0.376969
1	226	0.608471
1	230	0.297573
1	231	0.432738
1	233	0.468727
1	235	0.437408
1	236	0.381575
1	237	0.465156
1	239	0.470879
1	240	0.410165
1	241	0.204899
1	242	0.230403
2	6	0.232921
2	10	0.219689
2	17	0.414744
2	21	0.212683
2	25	0.327885
2	32	0.303114
2	63	0.229075
2	64	0.248993
2	72	0.259432
2	74	0.210714
2	115	0.354441
2	117	0.33054
2	132	0.201374
2	141	0.251374
2	142	0.200504
2	145	0.271703
2	196	0.269002
2	199	0.299496
2	206	0.233471
2	232	0.226099
2	238	0.223397
2	239	0.264423
2	242	0.221291
2	244	0.201648
3	5	0.426419
3	7	0.546429
3	8	0.242857
3	10	0.276419
3	11	0.20641
3	12	0.263874
3	14	0.286722
3	18	0.240751
3	19	0.291941
3	20	0.381502
3	22	0.284249
3	23	0.439789
3	24	0.500092
3	26	0.39359
3	27	0.417216
3	28	0.20261
3	29	0.37761
3	30	0.314377
3	36	0.424588
3	37	0.252839
3	40	0.270284
3	42	0.317491
3	43	0.230266
3	44	0.411401
3	48	0.286081
3	55	0.271932
3	58	0.406914
3	60	0.337363
3	61	0.343269
3	64	0.260943
3	65	0.292995
3	66	0.486172
3	68	0.278159
3	70	0.3212
3	71	0.313462
3	74	0.457051
3	75	0.374176
3	76	0.475412
3	78	0.232509
3	80	0.332005
3	81	0.418681
3	82	0.20641
3	83	0.47207
3	89	0.216667
3	90	0.300687
3	91	0.345009
3	92	0.226419
3	93	0.220055
3	94	0.30989
3	101	0.39098
3	103	0.416529
3	105	0.225229
3	110	0.38489
3	112	0.307352
3	114	0.517308
3	116	0.31978
3	117	0.275412
3	118	0.257601
3	121	0.30902
3	122	0.274957
3	124	0.266163
3	126	0.36717
3	127	0.411676
3	128	0.449222
3	129	0.366758
3	134	0.494872
3	138	0.263416
3	139	0.301374
3	141	0.230815
3	142	0.242674
3	144	0.447619
3	145	0.274542
3	146	0.367857
3	147	0.437225
3	148	0.283333
3	149	0.426648
3	150	0.288828
3	151	0.33109
3	152	0.308608
3	154	0.342582
3	156	0.340293
3	157	0.493452
3	163	0.338507
3	165	0.265934
3	166	0.440751
3	170	0.497436
3	171	0.265476
3	172	0.336584
3	173	0.343223
3	174	0.274634
3	175	0.421429
3	176	0.295604
3	177	0.3625
3	180	0.257463
3	181	0.338965
3	184	0.207372
3	185	0.233333
3	186	0.203159
3	188	0.371016
3	189	0.228984
3	190	0.266804
3	194	0.293544
3	195	0.340568
3	199	0.339789
3	200	0.346108
3	206	0.287775
3	207	0.352701
3	208	0.464973
3	209	0.259661
3	212	0.228297
3	215	0.345879
3	216	0.258562
3	217	0.300321
3	224	0.225046
3	226	0.559249
3	227	0.39478
3	229	0.206593
3	231	0.379121
3	233	0.212592
3	235	0.489286
3	236	0.213143
3	237	0.409112
3	239	0.301465
3	240	0.397802
3	241	0.307372
3	242	0.286355
4	5	0.577839
4	7	0.507784
4	8	0.31456
4	9	0.221795
4	10	0.594918
4	11	0.45696
4	14	0.371062
4	18	0.745467
4	19	0.597024
4	20	0.243269
4	21	0.656685
4	22	0.487179
4	23	0.334661
4	24	0.451603
4	26	0.366621
4	27	0.472665
4	28	0.618498
4	29	0.457875
4	30	0.268361
4	35	0.624824
4	36	0.608791
4	37	0.269734
4	41	0.586722
4	42	0.214286
4	43	0.526694
4	44	0.383837
4	48	0.683974
4	50	0.27207
4	51	0.543681
4	52	0.29794
4	54	0.216392
4	55	0.22413
4	57	0.31076
4	58	0.502793
4	60	0.546291
4	61	0.310531
4	63	0.449908
4	65	0.216667
4	70	0.56337
4	71	0.544918
4	72	0.323077
4	75	0.500778
4	78	0.524451
4	80	0.585302
4	81	0.62381
4	82	0.466346
4	83	0.380495
4	85	0.291896
4	87	0.219322
4	88	0.329396
4	90	0.340247
4	91	0.325366
4	92	0.564057
4	93	0.341209
4	94	0.300366
4	96	0.232097
4	97	0.249405
4	100	0.453114
4	101	0.583333
4	102	0.352015
4	104	0.352381
4	105	0.661538
4	109	0.237775
4	110	0.474084
4	111	0.223168
4	113	0.662393
4	114	0.306136
4	116	0.581685
4	118	0.289973
4	120	0.224176
4	121	0.698718
4	122	0.348058
4	123	0.357555
4	124	0.291804
4	125	0.307647
4	126	0.50957
4	128	0.298168
4	129	0.261493
4	131	0.619643
4	134	0.394734
4	135	0.212683
4	137	0.447711
4	138	0.507921
4	139	0.346612
4	140	0.314973
4	141	0.628617
4	143	0.402244
4	144	0.53196
4	145	0.308013
4	146	0.215705
4	147	0.247161
4	148	0.371062
4	149	0.233791
4	150	0.367582
4	153	0.281548
4	154	0.50467
4	155	0.209707
4	156	0.542857
4	157	0.575366
4	158	0.531273
4	159	0.292995
4	161	0.488278
4	162	0.337866
4	163	0.630174
4	165	0.580907
4	167	0.23109
4	168	0.251786
4	169	0.321795
4	171	0.567033
4	172	0.722161
4	173	0.346612
4	175	0.590156
4	176	0.352656
4	177	0.257051
4	178	0.389332
4	181	0.454899
4	184	0.499679
4	185	0.501282
4	186	0.249863
4	188	0.519963
4	192	0.284799
4	193	0.584478
4	195	0.619963
4	196	0.522299
4	197	0.633883
4	199	0.441712
4	200	0.611218
4	201	0.603578
4	202	0.646795
4	203	0.213828
4	204	0.229856
4	207	0.66891
4	209	0.392811
4	213	0.519597
4	214	0.241163
4	215	0.427656
4	216	0.474542
4	219	0.228342
4	220	0.486081
4	221	0.228068
4	224	0.201694
4	225	0.407051
4	226	0.26946
4	227	0.289194
4	230	0.566484
4	233	0.712042
4	235	0.212088
4	237	0.306822
4	239	0.533883
4	240	0.364744
4	242	0.358654
4	244	0.270192
5	7	0.661035
5	8	0.337546
5	9	0.497299
5	10	0.519689
5	11	0.607463
5	14	0.425
5	18	0.497894
5	19	0.531319
5	20	0.381777
5	21	0.47413
5	22	0.437225
5	23	0.491621
5	24	0.634524
5	26	0.454533
5	27	0.607555
5	28	0.377701
5	29	0.645833
5	30	0.32239
5	31	0.286355
5	35	0.380911
5	36	0.681822
5	37	0.481136
5	40	0.297573
5	42	0.429808
5	43	0.529258
5	44	0.332463
5	45	0.241209
5	48	0.485806
5	50	0.375412
5	52	0.246658
5	53	0.202198
5	54	0.228022
5	56	0.203159
5	58	0.611218
5	60	0.483608
5	61	0.579533
5	63	0.279762
5	65	0.377335
5	66	0.248397
5	70	0.657097
5	71	0.737866
5	72	0.230586
5	73	0.374679
5	74	0.463233
5	75	0.629167
5	77	0.220467
5	78	0.530861
5	80	0.62239
5	81	0.438462
5	82	0.569139
5	83	0.632005
5	85	0.24826
5	86	0.23631
5	88	0.218086
5	89	0.247665
5	90	0.661447
5	91	0.489332
5	92	0.414332
5	93	0.424679
5	94	0.29011
5	96	0.242308
5	97	0.377701
5	98	0.210256
5	100	0.410348
5	101	0.492903
5	103	0.530037
5	105	0.369139
5	106	0.244551
5	109	0.32706
5	110	0.38663
5	111	0.275549
5	112	0.361016
5	113	0.485537
5	114	0.5913
5	116	0.372711
5	118	0.383288
5	120	0.243315
5	121	0.535714
5	122	0.436978
5	123	0.287546
5	124	0.486676
5	126	0.656822
5	127	0.442903
5	128	0.538278
5	129	0.477701
5	130	0.269277
5	131	0.516621
5	134	0.607738
5	136	0.308451
5	137	0.491255
5	138	0.502106
5	139	0.389515
5	140	0.378892
5	141	0.522894
5	143	0.430632
5	144	0.589469
5	145	0.352976
5	146	0.35696
5	147	0.591804
5	148	0.454716
5	149	0.489652
5	150	0.594734
5	151	0.435348
5	153	0.418269
5	154	0.513553
5	156	0.719963
5	157	0.6087
5	158	0.34098
5	159	0.347802
5	161	0.333104
5	162	0.261447
5	163	0.616804
5	165	0.563507
5	166	0.445238
5	170	0.336218
5	171	0.529487
5	172	0.589057
5	173	0.258196
5	174	0.262866
5	175	0.70783
5	176	0.333242
5	177	0.476786
5	178	0.224176
5	179	0.413278
5	181	0.528755
5	184	0.607051
5	185	0.364377
5	186	0.211584
5	188	0.483883
5	189	0.367628
5	190	0.429029
5	191	0.270513
5	193	0.48196
5	194	0.340522
5	195	0.464744
5	196	0.329808
5	197	0.461859
5	199	0.427793
5	200	0.503984
5	201	0.424043
5	203	0.226465
5	207	0.707326
5	208	0.459478
5	209	0.458654
5	213	0.470101
5	215	0.546612
5	216	0.373443
5	217	0.253159
5	218	0.248306
5	219	0.232372
5	225	0.392903
5	226	0.56543
5	227	0.362729
5	230	0.383471
5	231	0.429625
5	233	0.408471
5	235	0.531731
5	236	0.506599
5	237	0.620147
5	239	0.44707
5	240	0.386722
5	241	0.283333
5	242	0.388416
6	14	0.242491
6	16	0.286126
6	17	0.280632
6	22	0.227335
6	33	0.338507
6	39	0.224542
6	47	0.321383
6	54	0.461767
6	62	0.211767
6	63	0.247985
6	65	0.275137
6	68	0.290842
6	69	0.20641
6	77	0.308242
6	94	0.328068
6	97	0.256181
6	101	0.274267
6	111	0.23631
6	117	0.260989
6	119	0.278617
6	135	0.296841
6	142	0.230174
6	149	0.388324
6	164	0.228571
6	172	0.233929
6	182	0.316026
6	185	0.343681
6	194	0.365064
6	198	0.239286
6	199	0.237821
6	202	0.281456
6	206	0.239286
6	217	0.393269
6	218	0.29881
6	225	0.260027
6	227	0.264881
6	229	0.240888
6	232	0.299084
6	235	0.255495
6	242	0.300183
6	243	0.284249
6	244	0.212042
7	8	0.334295
7	9	0.37065
7	10	0.547024
7	11	0.466758
7	13	0.228205
7	14	0.382005
7	16	0.21337
7	18	0.495101
7	19	0.596108
7	20	0.365659
7	21	0.64533
7	22	0.382647
7	23	0.449084
7	24	0.699634
7	26	0.608013
7	27	0.564881
7	28	0.248443
7	29	0.696337
7	30	0.379258
7	31	0.281822
7	35	0.367449
7	36	0.710531
7	37	0.513095
7	40	0.440064
7	42	0.516575
7	43	0.485623
7	44	0.591117
7	48	0.460211
7	50	0.324405
7	51	0.268956
7	55	0.2038
7	58	0.617628
7	59	0.235119
7	60	0.446154
7	61	0.578755
7	63	0.254625
7	64	0.243956
7	65	0.470101
7	66	0.429121
7	68	0.346886
7	70	0.605357
7	71	0.692857
7	72	0.212866
7	73	0.408379
7	74	0.604716
7	75	0.497436
7	76	0.259249
7	78	0.502885
7	80	0.673718
7	81	0.549405
7	82	0.543727
7	83	0.554899
7	86	0.218864
7	89	0.391346
7	90	0.605082
7	91	0.439332
7	92	0.424817
7	93	0.394139
7	94	0.474634
7	97	0.26543
7	100	0.333516
7	101	0.63402
7	103	0.598718
7	104	0.233379
7	105	0.436355
7	109	0.352381
7	110	0.390201
7	112	0.384986
7	113	0.485582
7	114	0.619826
7	116	0.403846
7	117	0.274725
7	118	0.410119
7	119	0.253022
7	121	0.575733
7	122	0.325713
7	123	0.360668
7	124	0.53956
7	126	0.646108
7	127	0.628846
7	128	0.505952
7	129	0.362866
7	130	0.268636
7	131	0.301282
7	133	0.233516
7	134	0.721749
7	137	0.410485
7	138	0.429487
7	139	0.45522
7	140	0.35609
7	141	0.501007
7	142	0.224588
7	143	0.227885
7	144	0.55609
7	145	0.465201
7	146	0.44707
7	147	0.681685
7	148	0.505723
7	149	0.521154
7	150	0.660806
7	151	0.504853
7	152	0.27935
7	153	0.421291
7	154	0.386538
7	156	0.705769
7	157	0.579441
7	158	0.350229
7	159	0.344826
7	160	0.236126
7	161	0.326099
7	162	0.287042
7	163	0.682692
7	165	0.53489
7	166	0.50119
7	170	0.338965
7	171	0.506685
7	172	0.605952
7	173	0.386584
7	174	0.325183
7	175	0.686859
7	176	0.394368
7	177	0.483333
7	179	0.498077
7	180	0.34391
7	181	0.505723
7	183	0.237866
7	184	0.591804
7	185	0.497711
7	186	0.396154
7	188	0.646612
7	189	0.422848
7	190	0.457463
7	191	0.375092
7	193	0.55815
7	194	0.359386
7	195	0.464011
7	196	0.208104
7	197	0.408929
7	199	0.411722
7	200	0.526877
7	201	0.350118
7	204	0.220653
7	206	0.20641
7	207	0.691667
7	208	0.539423
7	209	0.454167
7	211	0.219689
7	212	0.220925
7	213	0.462042
7	215	0.507189
7	216	0.527793
7	217	0.341941
7	222	0.236126
7	225	0.385302
7	226	0.646566
7	227	0.492949
7	230	0.413049
7	231	0.548077
7	233	0.476877
7	235	0.674084
7	236	0.445518
7	237	0.48544
7	239	0.472161
7	240	0.357189
7	241	0.272756
7	242	0.34359
8	10	0.276374
8	11	0.359341
8	18	0.275778
8	19	0.395879
8	20	0.269185
8	21	0.355998
8	22	0.333379
8	23	0.485027
8	24	0.377106
8	26	0.227473
8	27	0.381548
8	28	0.286767
8	29	0.25815
8	30	0.306639
8	36	0.499038
8	37	0.302152
8	40	0.325092
8	42	0.263828
8	43	0.295696
8	44	0.239469
8	48	0.256044
8	50	0.346886
8	57	0.240888
8	58	0.537408
8	60	0.435714
8	61	0.3087
8	65	0.304625
8	66	0.25348
8	67	0.22294
8	70	0.303388
8	71	0.298306
8	72	0.26598
8	74	0.290156
8	75	0.289881
8	76	0.276511
8	78	0.227244
8	80	0.397802
8	81	0.382555
8	83	0.35902
8	85	0.234799
8	89	0.382143
8	90	0.272802
8	91	0.328342
8	92	0.266346
8	93	0.284524
8	97	0.258929
8	101	0.359341
8	102	0.236355
8	103	0.429579
8	104	0.325046
8	105	0.360577
8	109	0.241804
8	110	0.34359
8	111	0.255815
8	112	0.3052
8	113	0.31129
8	114	0.405632
8	116	0.247894
8	118	0.398352
8	119	0.215568
8	121	0.373077
8	123	0.271474
8	124	0.435119
8	126	0.351328
8	129	0.26337
8	132	0.226145
8	133	0.231822
8	134	0.372207
8	135	0.204533
8	136	0.317746
8	137	0.308104
8	138	0.248031
8	140	0.296932
8	141	0.222207
8	144	0.45206
8	145	0.276511
8	146	0.369826
8	147	0.286401
8	148	0.429625
8	150	0.281868
8	151	0.227656
8	153	0.54217
8	154	0.345559
8	155	0.257189
8	156	0.291484
8	157	0.491896
8	158	0.442995
8	161	0.358288
8	162	0.266758
8	163	0.2788
8	165	0.271154
8	166	0.248443
8	167	0.234524
8	168	0.231319
8	170	0.456456
8	171	0.500275
8	172	0.200687
8	173	0.32587
8	174	0.258654
8	175	0.406136
8	176	0.430678
8	177	0.381364
8	178	0.203388
8	181	0.488324
8	183	0.249725
8	188	0.478342
8	190	0.237454
8	192	0.306777
8	193	0.238919
8	195	0.278388
8	197	0.283379
8	199	0.237317
8	200	0.39011
8	201	0.320288
8	203	0.257967
8	204	0.270791
8	206	0.226877
8	207	0.422711
8	209	0.343636
8	213	0.33054
8	215	0.370238
8	216	0.277015
8	220	0.260394
8	221	0.206731
8	222	0.225229
8	226	0.584707
8	227	0.327473
8	231	0.398489
8	233	0.243864
8	235	0.257784
8	237	0.333745
8	238	0.225412
8	239	0.278159
8	240	0.239515
8	241	0.213507
9	10	0.305907
9	11	0.322207
9	19	0.248443
9	20	0.222573
9	21	0.200412
9	24	0.31044
9	26	0.368315
9	27	0.387363
9	29	0.31891
9	30	0.260943
9	31	0.223214
9	35	0.206298
9	36	0.270513
9	37	0.501099
9	42	0.309478
9	43	0.264377
9	46	0.218498
9	47	0.284661
9	50	0.367308
9	58	0.341667
9	61	0.271062
9	63	0.240568
9	66	0.412683
9	68	0.240751
9	70	0.509478
9	71	0.360165
9	74	0.203984
9	75	0.526786
9	77	0.304029
9	78	0.365156
9	80	0.265659
9	82	0.343727
9	83	0.272344
9	84	0.343864
9	85	0.20293
9	86	0.217445
9	90	0.358333
9	92	0.238233
9	93	0.257555
9	94	0.325641
9	95	0.203571
9	97	0.313049
9	98	0.26598
9	101	0.321749
9	103	0.305998
9	105	0.243727
9	106	0.244689
9	109	0.391896
9	111	0.235211
9	114	0.373535
9	120	0.275366
9	121	0.203526
9	124	0.361538
9	126	0.311996
9	127	0.268956
9	128	0.374634
9	129	0.212821
9	130	0.24565
9	131	0.298352
9	134	0.282509
9	137	0.251511
9	138	0.283425
9	145	0.370513
9	147	0.393132
9	149	0.332463
9	150	0.398626
9	151	0.237088
9	153	0.371795
9	155	0.219002
9	156	0.408288
9	157	0.229167
9	158	0.238278
9	163	0.388553
9	165	0.264057
9	166	0.351007
9	172	0.276694
9	175	0.296932
9	177	0.256548
9	179	0.238874
9	184	0.3962
9	185	0.250366
9	188	0.224634
9	189	0.231639
9	190	0.318407
9	191	0.332692
9	193	0.315888
9	194	0.276969
9	195	0.237042
9	196	0.251236
9	197	0.273901
9	207	0.414103
9	208	0.358516
9	209	0.212042
9	211	0.271337
9	215	0.483288
9	223	0.222115
9	226	0.283425
9	227	0.274679
9	230	0.25902
9	231	0.328434
9	235	0.354487
9	236	0.442565
9	237	0.342628
9	239	0.202152
9	240	0.207647
9	241	0.207784
10	11	0.368086
10	14	0.27065
10	18	0.565385
10	19	0.555357
10	20	0.265476
10	21	0.613553
10	22	0.464194
10	23	0.348443
10	24	0.6125
10	26	0.450229
10	27	0.575916
10	28	0.444322
10	29	0.492537
10	30	0.291484
10	35	0.385215
10	36	0.496703
10	37	0.445147
10	40	0.262408
10	41	0.319139
10	42	0.419505
10	43	0.584478
10	44	0.490614
10	48	0.497894
10	50	0.257509
10	51	0.305861
10	52	0.283562
10	54	0.296108
10	57	0.335577
10	58	0.549405
10	60	0.333837
10	61	0.451786
10	63	0.300366
10	64	0.201419
10	65	0.472894
10	66	0.294826
10	70	0.498672
10	71	0.410027
10	72	0.339973
10	74	0.261813
10	75	0.544414
10	78	0.352015
10	80	0.567628
10	81	0.516438
10	82	0.325595
10	83	0.5587
10	85	0.222756
10	90	0.433471
10	91	0.350275
10	92	0.280082
10	93	0.446703
10	94	0.480861
10	97	0.258013
10	100	0.295009
10	101	0.568452
10	102	0.31946
10	103	0.340568
10	104	0.356319
10	105	0.571978
10	109	0.268773
10	110	0.279625
10	111	0.278571
10	112	0.24531
10	113	0.424959
10	114	0.33489
10	115	0.240018
10	116	0.49272
10	117	0.214011
10	118	0.236951
10	120	0.258883
10	121	0.651557
10	122	0.318754
10	123	0.232601
10	126	0.458333
10	127	0.443819
10	128	0.521337
10	129	0.238416
10	130	0.220925
10	131	0.444277
10	134	0.425137
10	135	0.408883
10	137	0.396245
10	138	0.31369
10	139	0.366896
10	140	0.256181
10	141	0.601236
10	143	0.341896
10	144	0.517445
10	145	0.313965
10	146	0.33457
10	147	0.449176
10	148	0.299222
10	149	0.339011
10	150	0.525641
10	152	0.339973
10	153	0.274634
10	154	0.461676
10	156	0.612821
10	157	0.496749
10	158	0.389973
10	159	0.299588
10	161	0.351877
10	162	0.434203
10	163	0.622161
10	165	0.532921
10	166	0.308929
10	171	0.589744
10	172	0.696749
10	173	0.361172
10	175	0.484112
10	176	0.412088
10	177	0.26511
10	178	0.237134
10	179	0.27239
10	181	0.350366
10	184	0.401557
10	185	0.557967
10	186	0.344872
10	188	0.503892
10	189	0.283974
10	190	0.332326
10	191	0.276648
10	193	0.535394
10	194	0.340522
10	195	0.500321
10	196	0.464377
10	197	0.352747
10	199	0.431044
10	200	0.566896
10	201	0.440252
10	202	0.36946
10	207	0.548214
10	208	0.353205
10	209	0.269277
10	211	0.215705
10	213	0.583974
10	215	0.358974
10	216	0.377015
10	217	0.215201
10	220	0.311218
10	225	0.458929
10	226	0.501465
10	227	0.298855
10	230	0.447299
10	233	0.692674
10	235	0.400504
10	236	0.288465
10	237	0.338645
10	239	0.555907
10	240	0.418681
10	241	0.256319
10	242	0.313599
11	14	0.250641
11	17	0.25261
11	18	0.422207
11	19	0.511951
11	20	0.307647
11	21	0.519231
11	22	0.448581
11	23	0.458562
11	24	0.407234
11	26	0.432463
11	27	0.519734
11	28	0.2913
11	29	0.589606
11	30	0.308837
11	33	0.249908
11	34	0.275366
11	35	0.337504
11	36	0.552564
11	37	0.233013
11	40	0.307555
11	42	0.496932
11	43	0.461905
11	44	0.318727
11	45	0.333104
11	48	0.388416
11	50	0.28402
11	51	0.228755
11	53	0.222024
11	54	0.332555
11	57	0.209524
11	58	0.422482
11	60	0.402839
11	61	0.522344
11	63	0.339057
11	65	0.346474
11	67	0.21337
11	70	0.455632
11	71	0.615659
11	73	0.380998
11	74	0.347573
11	75	0.508974
11	78	0.323077
11	80	0.591667
11	81	0.285302
11	82	0.455311
11	83	0.326511
11	86	0.385119
11	87	0.226923
11	89	0.410897
11	90	0.618956
11	91	0.398306
11	92	0.393773
11	93	0.460027
11	94	0.420788
11	97	0.340522
11	98	0.225641
11	100	0.401786
11	101	0.465293
11	103	0.451832
11	105	0.437088
11	110	0.292491
11	112	0.415733
11	113	0.429813
11	114	0.380769
11	115	0.249679
11	116	0.325595
11	117	0.278846
11	118	0.28315
11	119	0.209112
11	120	0.231868
11	121	0.520147
11	122	0.220996
11	124	0.404808
11	126	0.49739
11	127	0.432555
11	128	0.437592
11	129	0.421062
11	131	0.368452
11	134	0.628709
11	136	0.289564
11	137	0.510302
11	138	0.375962
11	139	0.21804
11	140	0.271108
11	141	0.421337
11	143	0.333562
11	144	0.465568
11	146	0.464835
11	147	0.532555
11	148	0.479945
11	149	0.420238
11	150	0.613736
11	151	0.512088
11	153	0.348947
11	154	0.227427
11	156	0.596612
11	157	0.4212
11	158	0.254212
11	159	0.53196
11	161	0.239515
11	162	0.440064
11	163	0.531822
11	165	0.447756
11	166	0.394368
11	171	0.434524
11	172	0.506227
11	173	0.290476
11	174	0.410485
11	175	0.632005
11	176	0.31804
11	177	0.545833
11	179	0.449222
11	181	0.487775
11	184	0.403846
11	185	0.446566
11	186	0.305082
11	188	0.480082
11	189	0.502701
11	190	0.366392
11	191	0.362958
11	193	0.436951
11	194	0.318819
11	195	0.286081
11	196	0.325321
11	197	0.538507
11	199	0.3462
11	200	0.407143
11	201	0.209801
11	207	0.656914
11	208	0.40119
11	209	0.343315
11	213	0.373947
11	215	0.54707
11	216	0.473581
11	220	0.238049
11	225	0.554625
11	226	0.509936
11	227	0.360211
11	230	0.416712
11	231	0.401374
11	233	0.379716
11	235	0.550092
11	236	0.565414
11	237	0.547756
11	239	0.381639
11	242	0.382875
11	243	0.224725
12	13	0.215888
12	20	0.24533
12	26	0.244689
12	36	0.23283
12	38	0.236264
12	39	0.303022
12	41	0.221978
12	43	0.203663
12	46	0.23315
12	54	0.433379
12	62	0.261996
12	67	0.20119
12	72	0.241163
12	83	0.264515
12	85	0.221566
12	98	0.23109
12	102	0.452335
12	103	0.267949
12	104	0.226328
12	106	0.212454
12	110	0.252976
12	114	0.397161
12	123	0.20174
12	125	0.212454
12	126	0.217445
12	135	0.251419
12	136	0.20046
12	145	0.225778
12	155	0.267628
12	157	0.226969
12	161	0.213828
12	167	0.346978
12	170	0.277015
12	180	0.234799
12	181	0.259478
12	185	0.241621
12	192	0.209158
12	202	0.241804
12	208	0.260485
12	209	0.203022
12	212	0.269093
12	214	0.340751
12	218	0.281181
12	224	0.228571
12	236	0.206023
12	243	0.251557
12	244	0.202152
13	15	0.663553
13	38	0.39794
13	40	0.228022
13	41	0.343223
13	45	0.46131
13	46	0.482784
13	52	0.330128
13	56	0.483929
13	59	0.630357
13	64	0.288324
13	65	0.20728
13	68	0.223764
13	74	0.20989
13	83	0.208974
13	84	0.243773
13	85	0.58196
13	87	0.221337
13	89	0.21891
13	90	0.257967
13	94	0.233471
13	95	0.658471
13	96	0.561584
13	97	0.200824
13	98	0.345147
13	99	0.645726
13	101	0.212408
13	106	0.290659
13	108	0.564103
13	112	0.28123
13	120	0.508654
13	127	0.325412
13	134	0.271658
13	146	0.251007
13	147	0.34739
13	149	0.332875
13	150	0.2462
13	154	0.235668
13	155	0.589835
13	160	0.329579
13	162	0.325962
13	164	0.506548
13	166	0.311767
13	167	0.235714
13	168	0.582738
13	169	0.601832
13	175	0.232051
13	179	0.283837
13	180	0.718864
13	182	0.233196
13	183	0.336172
13	185	0.216667
13	187	0.370238
13	190	0.251053
13	191	0.204533
13	192	0.469368
13	194	0.208242
13	199	0.245055
13	202	0.287729
13	203	0.561126
13	205	0.557738
13	208	0.36511
13	210	0.580952
13	212	0.594689
13	214	0.537179
13	220	0.243681
13	221	0.517125
13	225	0.221474
13	226	0.292995
13	228	0.310577
13	229	0.259295
13	231	0.26337
13	235	0.409615
13	237	0.227152
13	238	0.509799
14	18	0.429029
14	19	0.259753
14	21	0.240156
14	22	0.285211
14	23	0.27848
14	24	0.403297
14	25	0.506914
14	27	0.46337
14	28	0.251923
14	29	0.445147
14	30	0.417628
14	32	0.299542
14	33	0.415293
14	35	0.26754
14	36	0.26543
14	42	0.243727
14	43	0.372619
14	48	0.300137
14	50	0.227198
14	52	0.213049
14	54	0.260577
14	58	0.277335
14	60	0.477976
14	61	0.206502
14	63	0.516255
14	70	0.294734
14	71	0.326877
14	72	0.215385
14	74	0.218956
14	75	0.337958
14	78	0.202793
14	79	0.252839
14	80	0.355815
14	81	0.263599
14	83	0.330678
14	86	0.289332
14	88	0.327656
14	89	0.330128
14	90	0.34794
14	92	0.370833
14	94	0.342949
14	101	0.349817
14	103	0.302793
14	104	0.215522
14	105	0.288736
14	110	0.269277
14	113	0.577456
14	114	0.24011
14	115	0.247253
14	116	0.308104
14	117	0.398855
14	118	0.20728
14	121	0.440522
14	124	0.208333
14	125	0.255082
14	126	0.511859
14	129	0.273443
14	131	0.319139
14	133	0.222711
14	134	0.326007
14	137	0.436722
14	138	0.291712
14	139	0.325778
14	141	0.415522
14	144	0.316071
14	145	0.327473
14	146	0.321612
14	147	0.338416
14	148	0.238874
14	149	0.304945
14	150	0.385806
14	151	0.239148
14	152	0.286905
14	153	0.215293
14	156	0.334432
14	157	0.3837
14	163	0.390156
14	165	0.377015
14	171	0.379899
14	172	0.554533
14	173	0.447115
14	175	0.474222
14	176	0.202839
14	177	0.228938
14	181	0.30087
14	184	0.422619
14	185	0.395513
14	189	0.260256
14	193	0.316026
14	194	0.200778
14	195	0.332784
14	198	0.287225
14	199	0.234249
14	200	0.360714
14	201	0.385101
14	202	0.254945
14	206	0.379075
14	207	0.311676
14	209	0.273626
14	211	0.25119
14	212	0.33109
14	213	0.396566
14	215	0.248855
14	216	0.239286
14	217	0.225916
14	225	0.263462
14	226	0.283516
14	227	0.223993
14	230	0.288141
14	231	0.264744
14	233	0.278251
14	235	0.351328
14	237	0.355128
14	240	0.263507
14	242	0.316117
14	243	0.204304
15	20	0.356593
15	23	0.23054
15	28	0.245925
15	37	0.263874
15	38	0.487179
15	41	0.202839
15	45	0.523306
15	46	0.646749
15	52	0.451007
15	56	0.669093
15	59	0.787042
15	77	0.410302
15	85	0.623168
15	87	0.278388
15	95	0.624954
15	96	0.604029
15	97	0.3788
15	98	0.481548
15	99	0.727069
15	104	0.378892
15	106	0.475733
15	108	0.51076
15	111	0.275412
15	118	0.212683
15	120	0.635943
15	127	0.228388
15	130	0.208837
15	135	0.292262
15	150	0.236905
15	154	0.292216
15	155	0.573581
15	160	0.352656
15	162	0.302885
15	164	0.37706
15	166	0.200046
15	167	0.268407
15	168	0.677381
15	169	0.676603
15	179	0.217308
15	180	0.7212
15	183	0.208883
15	187	0.387134
15	192	0.416987
15	199	0.248123
15	202	0.41978
15	203	0.624863
15	205	0.72239
15	206	0.252198
15	208	0.225504
15	210	0.863965
15	212	0.595788
15	214	0.484982
15	220	0.21337
15	221	0.567995
15	229	0.461676
15	231	0.210623
15	235	0.219093
15	238	0.576832
15	243	0.210394
16	17	0.352747
16	24	0.223993
16	35	0.208794
16	38	0.447161
16	42	0.269872
16	46	0.341575
16	56	0.266529
16	57	0.262821
16	61	0.264377
16	65	0.303297
16	68	0.451923
16	77	0.368178
16	85	0.338049
16	91	0.200046
16	94	0.424313
16	95	0.29565
16	96	0.339332
16	97	0.351969
16	98	0.398168
16	111	0.233562
16	127	0.335852
16	128	0.24565
16	131	0.220375
16	149	0.244048
16	155	0.318544
16	160	0.335623
16	164	0.463782
16	168	0.316667
16	169	0.261264
16	178	0.635852
16	182	0.554945
16	185	0.341941
16	186	0.301465
16	190	0.333974
16	194	0.228984
16	203	0.358929
16	205	0.242811
16	214	0.326786
16	218	0.234341
16	220	0.352152
16	221	0.297756
16	222	0.28402
16	224	0.201328
16	227	0.203526
16	229	0.25087
16	232	0.216438
16	234	0.285943
16	235	0.239835
16	243	0.207051
16	244	0.201465
17	25	0.237179
17	32	0.304808
17	35	0.228482
17	38	0.249222
17	45	0.219093
17	55	0.238919
17	64	0.425137
17	65	0.234203
17	66	0.233059
17	67	0.268086
17	68	0.285027
17	72	0.289377
17	79	0.282875
17	98	0.306273
17	101	0.207189
17	104	0.202289
17	115	0.317399
17	117	0.509936
17	131	0.211035
17	142	0.277015
17	145	0.301511
17	164	0.260714
17	178	0.283104
17	183	0.238874
17	192	0.270284
17	199	0.257463
17	206	0.2375
17	218	0.233242
17	223	0.280815
17	232	0.381502
17	234	0.256181
17	241	0.217537
17	244	0.293544
18	19	0.630952
18	20	0.244918
18	21	0.666346
18	22	0.474634
18	23	0.518407
18	24	0.471978
18	26	0.394872
18	27	0.564148
18	28	0.547756
18	29	0.586676
18	30	0.247344
18	35	0.676725
18	36	0.512363
18	37	0.268452
18	41	0.546932
18	42	0.417628
18	43	0.579716
18	44	0.413004
18	48	0.708013
18	50	0.42033
18	51	0.555037
18	52	0.297024
18	57	0.354304
18	58	0.485989
18	60	0.554121
18	61	0.282234
18	62	0.214835
18	63	0.456181
18	66	0.201007
18	70	0.524359
18	71	0.536905
18	72	0.209112
18	74	0.213736
18	75	0.547115
18	77	0.247894
18	78	0.511676
18	80	0.570604
18	81	0.646383
18	82	0.341987
18	83	0.475824
18	85	0.248901
18	88	0.289973
18	89	0.236722
18	90	0.297344
18	91	0.438278
18	92	0.584661
18	93	0.363736
18	94	0.299267
18	100	0.344826
18	101	0.501694
18	102	0.284341
18	103	0.246383
18	104	0.243544
18	105	0.752564
18	109	0.347436
18	110	0.440156
18	113	0.602228
18	114	0.370147
18	116	0.583471
18	117	0.233379
18	118	0.393727
18	120	0.270604
18	121	0.733288
18	122	0.417335
18	123	0.361584
18	124	0.279258
18	126	0.490888
18	128	0.301236
18	129	0.271016
18	131	0.582555
18	133	0.249084
18	134	0.462958
18	135	0.22619
18	137	0.447207
18	138	0.635852
18	139	0.294597
18	140	0.343269
18	141	0.672711
18	144	0.502564
18	145	0.285577
18	146	0.264194
18	147	0.355723
18	148	0.485531
18	149	0.23924
18	150	0.384936
18	151	0.276786
18	152	0.211355
18	153	0.274725
18	154	0.542079
18	156	0.521154
18	157	0.614057
18	158	0.401877
18	159	0.334386
18	160	0.206456
18	161	0.528984
18	162	0.231868
18	163	0.656227
18	165	0.533471
18	168	0.239515
18	169	0.3413
18	171	0.526511
18	172	0.695879
18	173	0.531914
18	174	0.23022
18	175	0.545925
18	176	0.480815
18	177	0.247711
18	178	0.434295
18	179	0.205632
18	181	0.325733
18	184	0.41543
18	185	0.451328
18	186	0.283791
18	188	0.521429
18	192	0.244231
18	193	0.518407
18	195	0.548672
18	196	0.368681
18	197	0.475092
18	199	0.343132
18	200	0.655495
18	201	0.595016
18	202	0.602335
18	204	0.25726
18	207	0.632005
18	209	0.408929
18	213	0.549908
18	215	0.588919
18	216	0.488278
18	220	0.476145
18	225	0.447482
18	226	0.34446
18	227	0.311767
18	230	0.476648
18	232	0.322115
18	233	0.735073
18	235	0.244551
18	237	0.290614
18	239	0.529167
18	240	0.422344
18	242	0.339286
19	20	0.291071
19	21	0.694597
19	22	0.584112
19	23	0.482601
19	24	0.5375
19	26	0.456319
19	27	0.528205
19	28	0.391529
19	29	0.588782
19	30	0.250275
19	35	0.603578
19	36	0.533471
19	37	0.365659
19	40	0.219277
19	41	0.387179
19	42	0.45641
19	43	0.518452
19	44	0.554808
19	45	0.27413
19	48	0.579487
19	50	0.223352
19	51	0.396108
19	53	0.275733
19	54	0.264515
19	57	0.307601
19	58	0.44881
19	60	0.452198
19	61	0.525595
19	63	0.364927
19	65	0.381639
19	69	0.234799
19	70	0.567857
19	71	0.492903
19	72	0.231685
19	73	0.240659
19	74	0.34533
19	75	0.563599
19	78	0.501236
19	79	0.260806
19	80	0.620696
19	81	0.539194
19	82	0.459158
19	83	0.453938
19	84	0.224405
19	89	0.31424
19	90	0.427656
19	91	0.569139
19	92	0.409386
19	93	0.30641
19	94	0.31543
19	100	0.265751
19	101	0.472436
19	102	0.220604
19	103	0.281822
19	104	0.30902
19	105	0.64565
19	109	0.222527
19	110	0.389332
19	111	0.209158
19	113	0.393755
19	114	0.425595
19	116	0.417903
19	118	0.439835
19	121	0.560577
19	122	0.305292
19	123	0.300458
19	124	0.34359
19	126	0.486172
19	127	0.322573
19	128	0.361676
19	129	0.287683
19	131	0.515293
19	133	0.339469
19	134	0.558059
19	135	0.284982
19	137	0.404441
19	138	0.509936
19	140	0.447985
19	141	0.548306
19	143	0.394048
19	144	0.513324
19	145	0.229853
19	146	0.320925
19	147	0.376511
19	148	0.43109
19	149	0.36076
19	150	0.507326
19	151	0.322802
19	153	0.291667
19	154	0.478297
19	156	0.583059
19	157	0.492674
19	158	0.629853
19	159	0.473352
19	161	0.475458
19	162	0.435348
19	163	0.675595
19	165	0.471108
19	169	0.247894
19	170	0.2962
19	171	0.389286
19	172	0.615293
19	173	0.540888
19	175	0.557555
19	176	0.35467
19	177	0.241667
19	178	0.419826
19	179	0.331502
19	181	0.416484
19	182	0.230082
19	184	0.370925
[truncated: 11,855 more rows]

## Sheet: Location0.3
1	3	0.34533
1	4	0.537134
1	5	0.580952
1	7	0.592308
1	8	0.426603
1	10	0.515888
1	11	0.573214
1	14	0.429579
1	18	0.56685
1	19	0.371566
1	20	0.416026
1	21	0.462179
1	22	0.323764
1	23	0.425778
1	24	0.577335
1	26	0.529258
1	27	0.583608
1	28	0.392308
1	29	0.469322
1	30	0.415614
1	35	0.381666
1	36	0.656548
1	40	0.381548
1	42	0.412775
1	43	0.510989
1	44	0.334661
1	48	0.357097
1	50	0.532005
1	58	0.638416
1	60	0.55641
1	61	0.405815
1	66	0.42587
1	70	0.535577
1	71	0.537225
1	73	0.339148
1	74	0.43141
1	75	0.456639
1	78	0.419505
1	80	0.508013
1	81	0.560073
1	82	0.420971
1	83	0.500916
1	86	0.362683
1	89	0.342628
1	90	0.409478
1	92	0.425549
1	93	0.439377
1	94	0.40609
1	100	0.311813
1	101	0.518727
1	103	0.535394
1	105	0.430128
1	109	0.340888
1	110	0.47033
1	112	0.374981
1	113	0.531462
1	114	0.53576
1	115	0.333837
1	116	0.502976
1	117	0.342537
1	118	0.374038
1	121	0.551511
1	122	0.317311
1	123	0.310256
1	124	0.330174
1	126	0.662821
1	127	0.350458
1	128	0.467537
1	129	0.449771
1	131	0.424313
1	134	0.49043
1	137	0.490568
1	138	0.349542
1	141	0.548672
1	144	0.589744
1	145	0.409066
1	146	0.438004
1	147	0.54707
1	148	0.546474
1	150	0.495971
1	153	0.493773
1	154	0.353434
1	156	0.487866
1	157	0.635394
1	163	0.520696
1	165	0.553022
1	166	0.348581
1	170	0.338965
1	171	0.55119
1	172	0.547665
1	173	0.40522
1	174	0.451282
1	175	0.574405
1	176	0.493636
1	177	0.426877
1	181	0.481273
1	184	0.380357
1	185	0.359753
1	186	0.398993
1	188	0.496886
1	190	0.368452
1	191	0.36369
1	193	0.404991
1	195	0.417949
1	197	0.441987
1	199	0.411447
1	200	0.511676
1	201	0.393892
1	204	0.372165
1	207	0.535073
1	208	0.453342
1	209	0.533104
1	213	0.403159
1	215	0.484661
1	216	0.344322
1	225	0.376969
1	226	0.608471
1	231	0.432738
1	233	0.468727
1	235	0.437408
1	236	0.381575
1	237	0.465156
1	239	0.470879
1	240	0.410165
2	17	0.414744
2	25	0.327885
2	32	0.303114
2	115	0.354441
2	117	0.33054
3	5	0.426419
3	7	0.546429
3	20	0.381502
3	23	0.439789
3	24	0.500092
3	26	0.39359
3	27	0.417216
3	29	0.37761
3	30	0.314377
3	36	0.424588
3	42	0.317491
3	44	0.411401
3	58	0.406914
3	60	0.337363
3	61	0.343269
3	66	0.486172
3	70	0.3212
3	71	0.313462
3	74	0.457051
3	75	0.374176
3	76	0.475412
3	80	0.332005
3	81	0.418681
3	83	0.47207
3	90	0.300687
3	91	0.345009
3	94	0.30989
3	101	0.39098
3	103	0.416529
3	110	0.38489
3	112	0.307352
3	114	0.517308
3	116	0.31978
3	121	0.30902
3	126	0.36717
3	127	0.411676
3	128	0.449222
3	129	0.366758
3	134	0.494872
3	139	0.301374
3	144	0.447619
3	146	0.367857
3	147	0.437225
3	149	0.426648
3	151	0.33109
3	152	0.308608
3	154	0.342582
3	156	0.340293
3	157	0.493452
3	163	0.338507
3	166	0.440751
3	170	0.497436
3	172	0.336584
3	173	0.343223
3	175	0.421429
3	177	0.3625
3	181	0.338965
3	188	0.371016
3	195	0.340568
3	199	0.339789
3	200	0.346108
3	207	0.352701
3	208	0.464973
3	215	0.345879
3	217	0.300321
3	226	0.559249
3	227	0.39478
3	231	0.379121
3	235	0.489286
3	237	0.409112
3	239	0.301465
3	240	0.397802
3	241	0.307372
4	5	0.577839
4	7	0.507784
4	8	0.31456
4	10	0.594918
4	11	0.45696
4	14	0.371062
4	18	0.745467
4	19	0.597024
4	21	0.656685
4	22	0.487179
4	23	0.334661
4	24	0.451603
4	26	0.366621
4	27	0.472665
4	28	0.618498
4	29	0.457875
4	35	0.624824
4	36	0.608791
4	41	0.586722
4	43	0.526694
4	44	0.383837
4	48	0.683974
4	51	0.543681
4	57	0.31076
4	58	0.502793
4	60	0.546291
4	61	0.310531
4	63	0.449908
4	70	0.56337
4	71	0.544918
4	72	0.323077
4	75	0.500778
4	78	0.524451
4	80	0.585302
4	81	0.62381
4	82	0.466346
4	83	0.380495
4	88	0.329396
4	90	0.340247
4	91	0.325366
4	92	0.564057
4	93	0.341209
4	94	0.300366
4	100	0.453114
4	101	0.583333
4	102	0.352015
4	104	0.352381
4	105	0.661538
4	110	0.474084
4	113	0.662393
4	114	0.306136
4	116	0.581685
4	121	0.698718
4	122	0.348058
4	123	0.357555
4	125	0.307647
4	126	0.50957
4	131	0.619643
4	134	0.394734
4	137	0.447711
4	138	0.507921
4	139	0.346612
4	140	0.314973
4	141	0.628617
4	143	0.402244
4	144	0.53196
4	145	0.308013
4	148	0.371062
4	150	0.367582
4	154	0.50467
4	156	0.542857
4	157	0.575366
4	158	0.531273
4	161	0.488278
4	162	0.337866
4	163	0.630174
4	165	0.580907
4	169	0.321795
4	171	0.567033
4	172	0.722161
4	173	0.346612
4	175	0.590156
4	176	0.352656
4	178	0.389332
4	181	0.454899
4	184	0.499679
4	185	0.501282
4	188	0.519963
4	193	0.584478
4	195	0.619963
4	196	0.522299
4	197	0.633883
4	199	0.441712
4	200	0.611218
4	201	0.603578
4	202	0.646795
4	207	0.66891
4	209	0.392811
4	213	0.519597
4	215	0.427656
4	216	0.474542
4	220	0.486081
4	225	0.407051
4	230	0.566484
4	233	0.712042
4	237	0.306822
4	239	0.533883
4	240	0.364744
4	242	0.358654
5	7	0.661035
5	8	0.337546
5	9	0.497299
5	10	0.519689
5	11	0.607463
5	14	0.425
5	18	0.497894
5	19	0.531319
5	20	0.381777
5	21	0.47413
5	22	0.437225
5	23	0.491621
5	24	0.634524
5	26	0.454533
5	27	0.607555
5	28	0.377701
5	29	0.645833
5	30	0.32239
5	35	0.380911
5	36	0.681822
5	37	0.481136
5	42	0.429808
5	43	0.529258
5	44	0.332463
5	48	0.485806
5	50	0.375412
5	58	0.611218
5	60	0.483608
5	61	0.579533
5	65	0.377335
5	70	0.657097
5	71	0.737866
5	73	0.374679
5	74	0.463233
5	75	0.629167
5	78	0.530861
5	80	0.62239
5	81	0.438462
5	82	0.569139
5	83	0.632005
5	90	0.661447
5	91	0.489332
5	92	0.414332
5	93	0.424679
5	97	0.377701
5	100	0.410348
5	101	0.492903
5	103	0.530037
5	105	0.369139
5	109	0.32706
5	110	0.38663
5	112	0.361016
5	113	0.485537
5	114	0.5913
5	116	0.372711
5	118	0.383288
5	121	0.535714
5	122	0.436978
5	124	0.486676
5	126	0.656822
5	127	0.442903
5	128	0.538278
5	129	0.477701
5	131	0.516621
5	134	0.607738
5	136	0.308451
5	137	0.491255
5	138	0.502106
5	139	0.389515
5	140	0.378892
5	141	0.522894
5	143	0.430632
5	144	0.589469
5	145	0.352976
5	146	0.35696
5	147	0.591804
5	148	0.454716
5	149	0.489652
5	150	0.594734
5	151	0.435348
5	153	0.418269
5	154	0.513553
5	156	0.719963
5	157	0.6087
5	158	0.34098
5	159	0.347802
5	161	0.333104
5	163	0.616804
5	165	0.563507
5	166	0.445238
5	170	0.336218
5	171	0.529487
5	172	0.589057
5	175	0.70783
5	176	0.333242
5	177	0.476786
5	179	0.413278
5	181	0.528755
5	184	0.607051
5	185	0.364377
5	188	0.483883
5	189	0.367628
5	190	0.429029
5	193	0.48196
5	194	0.340522
5	195	0.464744
5	196	0.329808
5	197	0.461859
5	199	0.427793
5	200	0.503984
5	201	0.424043
5	207	0.707326
5	208	0.459478
5	209	0.458654
5	213	0.470101
5	215	0.546612
5	216	0.373443
5	225	0.392903
5	226	0.56543
5	227	0.362729
5	230	0.383471
5	231	0.429625
5	233	0.408471
5	235	0.531731
5	236	0.506599
5	237	0.620147
5	239	0.44707
5	240	0.386722
5	242	0.388416
6	33	0.338507
6	47	0.321383
6	54	0.461767
6	77	0.308242
6	94	0.328068
6	149	0.388324
6	182	0.316026
6	185	0.343681
6	194	0.365064
6	217	0.393269
6	242	0.300183
7	8	0.334295
7	9	0.37065
7	10	0.547024
7	11	0.466758
7	14	0.382005
7	18	0.495101
7	19	0.596108
7	20	0.365659
7	21	0.64533
7	22	0.382647
7	23	0.449084
7	24	0.699634
7	26	0.608013
7	27	0.564881
7	29	0.696337
7	30	0.379258
7	35	0.367449
7	36	0.710531
7	37	0.513095
7	40	0.440064
7	42	0.516575
7	43	0.485623
7	44	0.591117
7	48	0.460211
7	50	0.324405
7	58	0.617628
7	60	0.446154
7	61	0.578755
7	65	0.470101
7	66	0.429121
7	68	0.346886
7	70	0.605357
7	71	0.692857
7	73	0.408379
7	74	0.604716
7	75	0.497436
7	78	0.502885
7	80	0.673718
7	81	0.549405
7	82	0.543727
7	83	0.554899
7	89	0.391346
7	90	0.605082
7	91	0.439332
7	92	0.424817
7	93	0.394139
7	94	0.474634
7	100	0.333516
7	101	0.63402
7	103	0.598718
7	105	0.436355
7	109	0.352381
7	110	0.390201
7	112	0.384986
7	113	0.485582
7	114	0.619826
7	116	0.403846
7	118	0.410119
7	121	0.575733
7	122	0.325713
7	123	0.360668
7	124	0.53956
7	126	0.646108
7	127	0.628846
7	128	0.505952
7	129	0.362866
7	131	0.301282
7	134	0.721749
7	137	0.410485
7	138	0.429487
7	139	0.45522
7	140	0.35609
7	141	0.501007
7	144	0.55609
7	145	0.465201
7	146	0.44707
7	147	0.681685
7	148	0.505723
7	149	0.521154
7	150	0.660806
7	151	0.504853
7	153	0.421291
7	154	0.386538
7	156	0.705769
7	157	0.579441
7	158	0.350229
7	159	0.344826
7	161	0.326099
7	163	0.682692
7	165	0.53489
7	166	0.50119
7	170	0.338965
7	171	0.506685
7	172	0.605952
7	173	0.386584
7	174	0.325183
7	175	0.686859
7	176	0.394368
7	177	0.483333
7	179	0.498077
7	180	0.34391
7	181	0.505723
7	184	0.591804
7	185	0.497711
7	186	0.396154
7	188	0.646612
7	189	0.422848
7	190	0.457463
7	191	0.375092
7	193	0.55815
7	194	0.359386
7	195	0.464011
7	197	0.408929
7	199	0.411722
7	200	0.526877
7	201	0.350118
7	207	0.691667
7	208	0.539423
7	209	0.454167
7	213	0.462042
7	215	0.507189
7	216	0.527793
7	217	0.341941
7	225	0.385302
7	226	0.646566
7	227	0.492949
7	230	0.413049
7	231	0.548077
7	233	0.476877
7	235	0.674084
7	236	0.445518
7	237	0.48544
7	239	0.472161
7	240	0.357189
7	242	0.34359
8	11	0.359341
8	19	0.395879
8	21	0.355998
8	22	0.333379
8	23	0.485027
8	24	0.377106
8	27	0.381548
8	30	0.306639
8	36	0.499038
8	37	0.302152
8	40	0.325092
8	50	0.346886
8	58	0.537408
8	60	0.435714
8	61	0.3087
8	65	0.304625
8	70	0.303388
8	80	0.397802
8	81	0.382555
8	83	0.35902
8	89	0.382143
8	91	0.328342
8	101	0.359341
8	103	0.429579
8	104	0.325046
8	105	0.360577
8	110	0.34359
8	112	0.3052
8	113	0.31129
8	114	0.405632
8	118	0.398352
8	121	0.373077
8	124	0.435119
8	126	0.351328
8	134	0.372207
8	136	0.317746
8	137	0.308104
8	144	0.45206
8	146	0.369826
8	148	0.429625
8	153	0.54217
8	154	0.345559
8	157	0.491896
8	158	0.442995
8	161	0.358288
8	170	0.456456
8	171	0.500275
8	173	0.32587
8	175	0.406136
8	176	0.430678
8	177	0.381364
8	181	0.488324
8	188	0.478342
8	192	0.306777
8	200	0.39011
8	201	0.320288
8	207	0.422711
8	209	0.343636
8	213	0.33054
8	215	0.370238
8	226	0.584707
8	227	0.327473
8	231	0.398489
8	237	0.333745
9	10	0.305907
9	11	0.322207
9	24	0.31044
9	26	0.368315
9	27	0.387363
9	29	0.31891
9	37	0.501099
9	42	0.309478
9	50	0.367308
9	58	0.341667
9	66	0.412683
9	70	0.509478
9	71	0.360165
9	75	0.526786
9	77	0.304029
9	78	0.365156
9	82	0.343727
9	84	0.343864
9	90	0.358333
9	94	0.325641
9	97	0.313049
9	101	0.321749
9	103	0.305998
9	109	0.391896
9	114	0.373535
9	124	0.361538
9	126	0.311996
9	128	0.374634
9	145	0.370513
9	147	0.393132
9	149	0.332463
9	150	0.398626
9	153	0.371795
9	156	0.408288
9	163	0.388553
9	166	0.351007
9	184	0.3962
9	190	0.318407
9	191	0.332692
9	193	0.315888
9	207	0.414103
9	208	0.358516
9	215	0.483288
9	231	0.328434
9	235	0.354487
9	236	0.442565
9	237	0.342628
10	11	0.368086
10	18	0.565385
10	19	0.555357
10	21	0.613553
10	22	0.464194
10	23	0.348443
10	24	0.6125
10	26	0.450229
10	27	0.575916
10	28	0.444322
10	29	0.492537
10	35	0.385215
10	36	0.496703
10	37	0.445147
10	41	0.319139
10	42	0.419505
10	43	0.584478
10	44	0.490614
10	48	0.497894
10	51	0.305861
10	57	0.335577
10	58	0.549405
10	60	0.333837
10	61	0.451786
10	63	0.300366
10	65	0.472894
10	70	0.498672
10	71	0.410027
10	72	0.339973
10	75	0.544414
10	78	0.352015
10	80	0.567628
10	81	0.516438
10	82	0.325595
10	83	0.5587
10	90	0.433471
10	91	0.350275
10	93	0.446703
10	94	0.480861
10	101	0.568452
10	102	0.31946
10	103	0.340568
10	104	0.356319
10	105	0.571978
10	113	0.424959
10	114	0.33489
10	116	0.49272
10	121	0.651557
10	122	0.318754
10	126	0.458333
10	127	0.443819
10	128	0.521337
10	131	0.444277
10	134	0.425137
10	135	0.408883
10	137	0.396245
10	138	0.31369
10	139	0.366896
10	141	0.601236
10	143	0.341896
10	144	0.517445
10	145	0.313965
10	146	0.33457
10	147	0.449176
10	149	0.339011
10	150	0.525641
10	152	0.339973
10	154	0.461676
10	156	0.612821
10	157	0.496749
10	158	0.389973
10	161	0.351877
10	162	0.434203
10	163	0.622161
10	165	0.532921
10	166	0.308929
10	171	0.589744
10	172	0.696749
10	173	0.361172
10	175	0.484112
10	176	0.412088
10	181	0.350366
10	184	0.401557
10	185	0.557967
10	186	0.344872
10	188	0.503892
10	190	0.332326
10	193	0.535394
10	194	0.340522
10	195	0.500321
10	196	0.464377
10	197	0.352747
10	199	0.431044
10	200	0.566896
10	201	0.440252
10	202	0.36946
10	207	0.548214
10	208	0.353205
10	213	0.583974
10	215	0.358974
10	216	0.377015
10	220	0.311218
10	225	0.458929
10	226	0.501465
10	230	0.447299
10	233	0.692674
10	235	0.400504
10	237	0.338645
10	239	0.555907
10	240	0.418681
10	242	0.313599
11	18	0.422207
11	19	0.511951
11	20	0.307647
11	21	0.519231
11	22	0.448581
11	23	0.458562
11	24	0.407234
11	26	0.432463
11	27	0.519734
11	29	0.589606
11	30	0.308837
11	35	0.337504
11	36	0.552564
11	40	0.307555
11	42	0.496932
11	43	0.461905
11	44	0.318727
11	45	0.333104
11	48	0.388416
11	54	0.332555
11	58	0.422482
11	60	0.402839
11	61	0.522344
11	63	0.339057
11	65	0.346474
11	70	0.455632
11	71	0.615659
11	73	0.380998
11	74	0.347573
11	75	0.508974
11	78	0.323077
11	80	0.591667
11	82	0.455311
11	83	0.326511
11	86	0.385119
11	89	0.410897
11	90	0.618956
11	91	0.398306
11	92	0.393773
11	93	0.460027
11	94	0.420788
11	97	0.340522
11	100	0.401786
11	101	0.465293
11	103	0.451832
11	105	0.437088
11	112	0.415733
11	113	0.429813
11	114	0.380769
11	116	0.325595
11	121	0.520147
11	124	0.404808
11	126	0.49739
11	127	0.432555
11	128	0.437592
11	129	0.421062
11	131	0.368452
11	134	0.628709
11	137	0.510302
11	138	0.375962
11	141	0.421337
11	143	0.333562
11	144	0.465568
11	146	0.464835
11	147	0.532555
11	148	0.479945
11	149	0.420238
11	150	0.613736
11	151	0.512088
11	153	0.348947
11	156	0.596612
11	157	0.4212
11	159	0.53196
11	162	0.440064
11	163	0.531822
11	165	0.447756
11	166	0.394368
11	171	0.434524
11	172	0.506227
11	174	0.410485
11	175	0.632005
11	176	0.31804
11	177	0.545833
11	179	0.449222
11	181	0.487775
11	184	0.403846
11	185	0.446566
11	186	0.305082
11	188	0.480082
11	189	0.502701
11	190	0.366392
11	191	0.362958
11	193	0.436951
11	194	0.318819
11	196	0.325321
11	197	0.538507
11	199	0.3462
11	200	0.407143
11	207	0.656914
11	208	0.40119
11	209	0.343315
11	213	0.373947
11	215	0.54707
11	216	0.473581
11	225	0.554625
11	226	0.509936
11	227	0.360211
11	230	0.416712
11	231	0.401374
11	233	0.379716
11	235	0.550092
11	236	0.565414
11	237	0.547756
11	239	0.381639
11	242	0.382875
12	39	0.303022
12	54	0.433379
12	102	0.452335
12	114	0.397161
12	167	0.346978
12	214	0.340751
13	15	0.663553
13	38	0.39794
13	41	0.343223
13	45	0.46131
13	46	0.482784
13	52	0.330128
13	56	0.483929
13	59	0.630357
13	85	0.58196
13	95	0.658471
13	96	0.561584
13	98	0.345147
13	99	0.645726
13	108	0.564103
13	120	0.508654
13	127	0.325412
13	147	0.34739
13	149	0.332875
13	155	0.589835
13	160	0.329579
13	162	0.325962
13	164	0.506548
13	166	0.311767
13	168	0.582738
13	169	0.601832
13	180	0.718864
13	183	0.336172
13	187	0.370238
13	192	0.469368
13	203	0.561126
13	205	0.557738
13	208	0.36511
13	210	0.580952
13	212	0.594689
13	214	0.537179
13	221	0.517125
13	228	0.310577
13	235	0.409615
13	238	0.509799
14	18	0.429029
14	24	0.403297
14	25	0.506914
14	27	0.46337
14	29	0.445147
14	30	0.417628
14	33	0.415293
14	43	0.372619
14	48	0.300137
14	60	0.477976
14	63	0.516255
14	71	0.326877
14	75	0.337958
14	80	0.355815
14	83	0.330678
14	88	0.327656
14	89	0.330128
14	90	0.34794
14	92	0.370833
14	94	0.342949
14	101	0.349817
14	103	0.302793
14	113	0.577456
14	116	0.308104
14	117	0.398855
14	121	0.440522
14	126	0.511859
14	131	0.319139
14	134	0.326007
14	137	0.436722
14	139	0.325778
14	141	0.415522
14	144	0.316071
14	145	0.327473
14	146	0.321612
14	147	0.338416
14	149	0.304945
14	150	0.385806
14	156	0.334432
14	157	0.3837
14	163	0.390156
14	165	0.377015
14	171	0.379899
14	172	0.554533
14	173	0.447115
14	175	0.474222
14	181	0.30087
14	184	0.422619
14	185	0.395513
14	193	0.316026
14	195	0.332784
14	200	0.360714
14	201	0.385101
14	206	0.379075
14	207	0.311676
14	212	0.33109
14	213	0.396566
14	235	0.351328
14	237	0.355128
14	242	0.316117
15	20	0.356593
15	38	0.487179
15	45	0.523306
15	46	0.646749
15	52	0.451007
15	56	0.669093
15	59	0.787042
15	77	0.410302
15	85	0.623168
15	95	0.624954
15	96	0.604029
15	97	0.3788
15	98	0.481548
15	99	0.727069
15	104	0.378892
15	106	0.475733
15	108	0.51076
15	120	0.635943
15	155	0.573581
15	160	0.352656
15	162	0.302885
15	164	0.37706
15	168	0.677381
15	169	0.676603
15	180	0.7212
15	187	0.387134
15	192	0.416987
15	202	0.41978
15	203	0.624863
15	205	0.72239
15	210	0.863965
15	212	0.595788
15	214	0.484982
15	221	0.567995
15	229	0.461676
15	238	0.576832
16	17	0.352747
16	38	0.447161
16	46	0.341575
16	65	0.303297
16	68	0.451923
16	77	0.368178
16	85	0.338049
16	94	0.424313
16	96	0.339332
16	97	0.351969
16	98	0.398168
16	127	0.335852
16	155	0.318544
16	160	0.335623
16	164	0.463782
16	168	0.316667
16	178	0.635852
16	182	0.554945
16	185	0.341941
16	186	0.301465
16	190	0.333974
16	203	0.358929
16	214	0.326786
16	220	0.352152
17	32	0.304808
17	64	0.425137
17	98	0.306273
17	115	0.317399
17	117	0.509936
17	145	0.301511
17	232	0.381502
18	19	0.630952
18	21	0.666346
18	22	0.474634
18	23	0.518407
18	24	0.471978
18	26	0.394872
18	27	0.564148
18	28	0.547756
18	29	0.586676
18	35	0.676725
18	36	0.512363
18	41	0.546932
18	42	0.417628
18	43	0.579716
18	44	0.413004
18	48	0.708013
18	50	0.42033
18	51	0.555037
18	57	0.354304
18	58	0.485989
18	60	0.554121
18	63	0.456181
18	70	0.524359
18	71	0.536905
18	75	0.547115
18	78	0.511676
18	80	0.570604
18	81	0.646383
18	82	0.341987
18	83	0.475824
18	91	0.438278
18	92	0.584661
18	93	0.363736
18	100	0.344826
18	101	0.501694
18	105	0.752564
18	109	0.347436
18	110	0.440156
18	113	0.602228
18	114	0.370147
18	116	0.583471
18	118	0.393727
18	121	0.733288
18	122	0.417335
18	123	0.361584
18	126	0.490888
18	128	0.301236
18	131	0.582555
18	134	0.462958
18	137	0.447207
18	138	0.635852
18	140	0.343269
18	141	0.672711
18	144	0.502564
18	147	0.355723
18	148	0.485531
18	150	0.384936
18	154	0.542079
18	156	0.521154
18	157	0.614057
18	158	0.401877
18	159	0.334386
18	161	0.528984
18	163	0.656227
18	165	0.533471
18	169	0.3413
18	171	0.526511
18	172	0.695879
18	173	0.531914
18	175	0.545925
18	176	0.480815
18	178	0.434295
18	181	0.325733
18	184	0.41543
18	185	0.451328
18	188	0.521429
18	193	0.518407
18	195	0.548672
18	196	0.368681
18	197	0.475092
18	199	0.343132
18	200	0.655495
18	201	0.595016
18	202	0.602335
18	207	0.632005
18	209	0.408929
18	213	0.549908
18	215	0.588919
18	216	0.488278
18	220	0.476145
18	225	0.447482
18	226	0.34446
18	227	0.311767
18	230	0.476648
18	232	0.322115
18	233	0.735073
18	239	0.529167
18	240	0.422344
18	242	0.339286
19	21	0.694597
19	22	0.584112
19	23	0.482601
19	24	0.5375
19	26	0.456319
19	27	0.528205
19	28	0.391529
19	29	0.588782
19	35	0.603578
19	36	0.533471
19	37	0.365659
19	41	0.387179
19	42	0.45641
19	43	0.518452
19	44	0.554808
19	48	0.579487
19	51	0.396108
19	57	0.307601
19	58	0.44881
19	60	0.452198
19	61	0.525595
19	63	0.364927
19	65	0.381639
19	70	0.567857
19	71	0.492903
19	74	0.34533
19	75	0.563599
19	78	0.501236
19	80	0.620696
19	81	0.539194
19	82	0.459158
19	83	0.453938
19	89	0.31424
19	90	0.427656
19	91	0.569139
19	92	0.409386
19	93	0.30641
19	94	0.31543
19	101	0.472436
19	104	0.30902
19	105	0.64565
19	110	0.389332
19	113	0.393755
19	114	0.425595
19	116	0.417903
19	118	0.439835
19	121	0.560577
19	122	0.305292
19	123	0.300458
19	124	0.34359
19	126	0.486172
19	127	0.322573
19	128	0.361676
19	131	0.515293
19	133	0.339469
19	134	0.558059
19	137	0.404441
19	138	0.509936
19	140	0.447985
19	141	0.548306
19	143	0.394048
19	144	0.513324
19	146	0.320925
19	147	0.376511
19	148	0.43109
19	149	0.36076
19	150	0.507326
19	151	0.322802
19	154	0.478297
19	156	0.583059
19	157	0.492674
19	158	0.629853
19	159	0.473352
19	161	0.475458
19	162	0.435348
19	163	0.675595
19	165	0.471108
19	171	0.389286
19	172	0.615293
19	173	0.540888
19	175	0.557555
19	176	0.35467
19	178	0.419826
19	179	0.331502
19	181	0.416484
19	184	0.370925
19	185	0.518681
19	188	0.639103
19	189	0.420375
19	193	0.457967
19	195	0.476648
19	196	0.37935
19	197	0.550595
19	200	0.626465
19	201	0.377477
19	202	0.368773
19	207	0.599176
19	209	0.342949
19	213	0.4375
19	215	0.539286
19	216	0.498855
19	220	0.475549
19	225	0.54098
19	226	0.448993
19	227	0.398855
19	230	0.457234
19	233	0.640385
19	235	0.382189
19	236	0.35108
19	237	0.33924
19	239	0.467582
19	240	0.348306
19	242	0.403388
20	23	0.481364
20	24	0.488645
20	27	0.307647
20	30	0.510302
20	36	0.467399
20	38	0.366117
20	43	0.452152
20	46	0.510073
20	52	0.337958
20	53	0.367811
20	55	0.392857
20	56	0.372299
20	58	0.496337
20	59	0.376648
20	61	0.417216
20	64	0.491392
20	66	0.538004
20	70	0.485394
20	74	0.303159
20	77	0.412866
20	85	0.453938
20	93	0.509753
20	94	0.331044
20	95	0.359112
20	96	0.457234
20	97	0.453709
20	98	0.46044
20	99	0.325484
20	101	0.43663
20	103	0.373077
20	104	0.520879
20	106	0.378709
20	114	0.360165
20	115	0.393315
20	118	0.301053
20	120	0.527015
20	126	0.376328
20	129	0.387958
20	140	0.589515
20	142	0.457921
20	144	0.387042
20	145	0.450137
20	146	0.363233
20	149	0.445971
20	150	0.359661
20	152	0.41685
20	154	0.415476
20	157	0.402152
20	166	0.423855
20	168	0.452152
20	169	0.480769
20	170	0.451328
20	173	0.410668
20	175	0.352976
20	183	0.364057
20	186	0.384615
20	187	0.438828
20	188	0.438599
20	189	0.323535
20	191	0.366804
20	194	0.482555
20	199	0.465797
20	203	0.442857
20	204	0.381483
20	205	0.393773
20	206	0.459615
20	207	0.33457
20	210	0.407921
20	215	0.363233
20	221	0.310943
20	223	0.49217
20	226	0.341484
20	229	0.505998
20	235	0.457784
20	236	0.323905
20	237	0.396062
20	239	0.313507
20	241	0.358745
20	242	0.517308
21	22	0.466209
21	23	0.461584
21	24	0.499771
21	26	0.447711
21	27	0.467033
21	28	0.402335
21	29	0.622573
21	35	0.560446
21	36	0.588278
21	37	0.363782
21	40	0.326099
21	41	0.340797
21	42	0.441529
21	43	0.591392
21	44	0.542766
21	48	0.637592
21	50	0.312912
21	51	0.420055
21	53	0.301328
21	57	0.385531
21	58	0.509844
21	60	0.396566
21	61	0.461355
21	63	0.335623
21	65	0.393773
21	70	0.601328
21	71	0.598581
21	75	0.499222
21	78	0.523947
21	80	0.633929
21	81	0.531822
21	82	0.421612
21	83	0.496291
21	90	0.367811
21	91	0.560943
21	92	0.486264
21	93	0.401923
21	94	0.326145
21	101	0.610943
21	103	0.300366
21	104	0.326969
21	105	0.685027
21	109	0.327244
21	110	0.410302
21	113	0.441489
21	114	0.432555
21	116	0.487179
21	117	0.303892
21	118	0.345559
21	121	0.704029
21	123	0.329991
21	124	0.386584
21	126	0.506639
21	128	0.301007
21	131	0.404029
21	134	0.564744
21	137	0.39043
21	138	0.553984
21	140	0.395101
21	141	0.501648
21	143	0.334707
21	144	0.515751
21	145	0.346932
21	146	0.304258
21	147	0.360943
21	148	0.452564
21	149	0.402473
21	150	0.574267
21	151	0.369002
21	153	0.427335
21	154	0.496658
21	156	0.597161
21	157	0.554029
21	158	0.407509
21	159	0.429441
21	161	0.46978
21	162	0.405815
21	163	0.69185
21	165	0.542353
21	171	0.48109
21	172	0.607967
21	173	0.447024
21	175	0.578892
21	176	0.436813
21	178	0.438095
21	181	0.3288
21	184	0.450549
21	185	0.542995
21	188	0.643636
21	189	0.33837
21	191	0.391712
21	193	0.588874
21	195	0.461126
21	196	0.371062
21	197	0.505403
21	199	0.420696
21	200	0.600962
21	201	0.377935
21	202	0.404258
21	204	0.308955
21	207	0.661813
21	209	0.427885
21	213	0.549405
21	215	0.517582
21	216	0.538187
21	220	0.402747
21	225	0.539377
21	226	0.466163
21	227	0.438416
21	230	0.505449
21	233	0.596841
21	235	0.374405
21	236	0.392747
21	237	0.302885
21	239	0.552839
21	242	0.424359
22	23	0.478938
22	24	0.385027
22	27	0.446658
22	28	0.379716
22	29	0.431822
22	30	0.416026
22	35	0.470495
22	36	0.362637
22	37	0.305495
22	39	0.304899
22	43	0.430311
22	44	0.432051
22	48	0.487729
22	54	0.531273
22	57	0.555311
22	58	0.438004
22	60	0.300458
22	63	0.405907
22	65	0.40293
22	66	0.374679
22	71	0.425641
22	74	0.305266
22	75	0.336401
22	78	0.320696
22	80	0.436081
22	81	0.422299
22	83	0.399863
22	89	0.369185
22	91	0.357372
22	92	0.382005
22	94	0.518773
22	97	0.441026
22	100	0.314835
22	101	0.446474
22	102	0.459707
22	104	0.547802
22	105	0.399451
22	110	0.335897
22	111	0.314423
22	113	0.312069
22	114	0.339194
22	115	0.35989
22	116	0.457738
22	118	0.346016
22	121	0.439973
22	125	0.357463
22	128	0.32935
22	131	0.351282
22	133	0.31131
22	134	0.462363
22	135	0.335394
22	137	0.543132
22	140	0.519551
22	142	0.365797
22	143	0.451145
22	144	0.345192
22	146	0.638553
22	147	0.315568
22	148	0.416941
22	149	0.441712
22	150	0.425275
22	154	0.324679
22	156	0.395238
22	157	0.445147
22	158	0.392903
22	159	0.615751
22	162	0.449267
22	163	0.464973
22	165	0.305998
22	171	0.339332
22	172	0.481685
22	173	0.388736
22	175	0.41804
22	178	0.469139
22	181	0.312592
22	185	0.587179
22	188	0.469048
22	189	0.583654
22	192	0.383471
22	193	0.404762
22	194	0.404304
22	195	0.442857
22	197	0.377473
22	198	0.365751
22	199	0.369918
22	200	0.433929
22	201	0.376538
22	202	0.368819
22	204	0.390206
22	207	0.535668
22	215	0.35989
22	216	0.307372
22	220	0.38109
22	223	0.302335
22	225	0.782463
22	226	0.405449
22	227	0.476374
22	230	0.476603
22	233	0.432234
22	235	0.399634
22	239	0.494734
22	240	0.330952
22	241	0.319963
22	242	0.452656
22	243	0.556181
23	24	0.540568
23	26	0.404808
23	27	0.461538
23	28	0.444048
23	29	0.377793
23	30	0.318864
23	35	0.40756
23	36	0.524267
23	40	0.424725
23	42	0.529029
23	43	0.555907
23	44	0.434295
23	48	0.503709
23	50	0.349817
23	53	0.499817
23	58	0.616071
23	60	0.336081
23	61	0.371749
23	66	0.416071
23	70	0.387592
23	71	0.525412
23	78	0.399725
23	80	0.589789
23	81	0.510623
23	83	0.387592
23	89	0.358929
23	91	0.485714
23	92	0.440522
23	93	0.348581
23	94	0.315064
23	101	0.415568
23	103	0.392353
23	105	0.376694
23	109	0.30261
23	110	0.353526
23	114	0.543132
23	118	0.551053
23	121	0.513233
23	122	0.441466
23	123	0.364698
23	124	0.311538
23	126	0.381593
23	128	0.317949
23	129	0.331456
23	131	0.312637
23	134	0.485577
23	136	0.316533
23	137	0.336126
23	138	0.451511
23	140	0.452885
23	141	0.373443
23	144	0.431639
23	145	0.305586
23	146	0.307692
23	147	0.420879
23	148	0.43402
23	149	0.334112
23	150	0.48402
23	151	0.379533
23	153	0.31804
23	154	0.467628
23	156	0.45609
23	157	0.492949
23	158	0.322024
23	159	0.383791
23	163	0.494093
23	168	0.319826
23	170	0.415568
23	171	0.364423
23	172	0.325641
23	173	0.525137
23	174	0.338965
23	175	0.516163
23	176	0.359341
23	177	0.436951
23	178	0.314606
23	179	0.30467
23	181	0.449542
23	188	0.558425
23	189	0.320238
23	193	0.444322
23	199	0.336859
23	200	0.35902
23	201	0.326423
23	204	0.360947
23	206	0.394093
23	207	0.543315
23	209	0.44794
23	213	0.323123
23	215	0.503617
23	216	0.483196
23	225	0.361722
23	226	0.515751
23	227	0.475137
23	230	0.409249
23	231	0.316758
23	233	0.361218
23	235	0.349405
23	236	0.363924
23	237	0.346429
23	239	0.355861
23	240	0.411905
24	26	0.381868
24	27	0.698352
24	28	0.301511
24	29	0.445513
24	30	0.335714
24	36	0.665751
24	37	0.439377
24	38	0.332921
24	40	0.398581
24	42	0.539973
24	43	0.45467
24	44	0.516667
24	46	0.321016
24	48	0.411813
24	50	0.362958
24	56	0.316209
24	58	0.7038
24	60	0.50261
24	61	0.592033
24	65	0.398352
24	66	0.386401
24	70	0.641896
24	71	0.513462
24	72	0.321658
24	73	0.386722
24	74	0.46891
24	75	0.449863
24	78	0.369139
24	80	0.54707
24	81	0.552198
24	82	0.506685
24	83	0.499359
24	85	0.364789
24	90	0.529121
24	91	0.496978
24	93	0.390522
24	94	0.490568
24	96	0.350366
24	97	0.416209
24	98	0.312134
24	100	0.347436
24	101	0.500595
24	103	0.491667
24	104	0.359478
24	105	0.402518
24	109	0.345788
24	110	0.338004
24	111	0.401099
24	112	0.341213
24	113	0.360696
24	114	0.558196
24	116	0.373397
24	118	0.499267
24	120	0.375733
24	121	0.498581
24	122	0.32988
24	123	0.346245
24	124	0.375687
24	126	0.537592
24	127	0.448535
24	128	0.536401
24	129	0.346245
24	134	0.544048
24	135	0.402656
24	136	0.328873
24	137	0.383608
24	138	0.391804
24	139	0.382967
24	140	0.33924
24	141	0.543132
24	144	0.566438
24	145	0.36337
24	146	0.393223
24	147	0.529121
24	148	0.42587
24	149	0.337729
24	150	0.532326
24	151	0.306319
24	152	0.414606
24	153	0.362225
24	154	0.505678
24	155	0.306868
24	156	0.600504
24	157	0.598718
24	158	0.354762
24	161	0.367262
24	163	0.521108
24	165	0.53283
24	166	0.352976
24	168	0.403068
24	169	0.403755
24	170	0.437775
24	171	0.622115
24	172	0.514652
24	173	0.377198
24	175	0.537042
24	176	0.436538
24	177	0.388645
24	179	0.377335
24	181	0.459112
24	184	0.35206
24	185	0.433242
24	186	0.371841
24	188	0.596474
24	189	0.42239
24	190	0.461951
24	193	0.415476
24	194	0.433516
24	195	0.416026
24	199	0.574588
24	200	0.51946
24	201	0.350004
24	203	0.368681
24	207	0.542445
24	208	0.436538
24	209	0.56946
24	213	0.435211
24	215	0.468498
24	216	0.332738
24	221	0.374405
24	226	0.61772
24	227	0.394139
24	229	0.373764
24	230	0.319277
24	231	0.48837
24	233	0.416209
24	235	0.499084
24	236	0.39712
24	237	0.542079
24	238	0.335211
24	239	0.53489
24	240	0.358104
24	242	0.305403
25	30	0.38228
25	32	0.371062
25	33	0.327473
25	63	0.417995
25	81	0.304533
25	89	0.326282
25	92	0.37935
25	110	0.357692
25	113	0.379652
25	117	0.415476
25	126	0.371795
25	137	0.349405
25	145	0.346886
25	148	0.356319
25	174	0.30641
25	193	0.307875
25	201	0.334344
25	204	0.350508
25	206	0.318681
25	212	0.30435
25	213	0.316026
25	219	0.301374
26	27	0.4663
26	28	0.426007
26	29	0.54478
26	35	0.307375
26	36	0.554121
26	37	0.391255
26	40	0.426328
26	42	0.579991
26	43	0.540018
26	44	0.496795
26	48	0.512821
26	50	0.348031
26	51	0.362683
26	58	0.455495
26	60	0.332647
26	61	0.367262
26	66	0.304029
26	68	0.394277
26	70	0.361493
26	71	0.487225
26	74	0.438874
26	75	0.503709
26	78	0.512637
26	80	0.574771
26	81	0.551374
26	82	0.416071
26	83	0.485394
26	86	0.357189
26	90	0.42674
26	91	0.458059
26	92	0.548031
26	93	0.474084
26	94	0.344048
26	100	0.467537
26	101	0.463645
26	103	0.432418
26	105	0.472344
26	109	0.350046
26	110	0.38054
26	112	0.336199
26	113	0.402912
26	114	0.580861
26	116	0.426923
26	117	0.304304
26	118	0.314148
26	121	0.442491
26	122	0.365343
26	124	0.454991
26	126	0.535714
26	127	0.398901
26	128	0.488736
26	131	0.453984
26	133	0.314744
26	134	0.633288
26	137	0.404487
26	138	0.384341
26	139	0.305723
26	141	0.374267
26	144	0.47619
26	145	0.429212
26	147	0.514423
26	148	0.534615
26	149	0.387363
26	150	0.497802
26	151	0.398306
26	153	0.516896
26	154	0.393361
26	156	0.484661
26	157	0.451465
26	159	0.326465
26	163	0.660485
26	165	0.404853
26	166	0.357738
26	170	0.369139
26	171	0.358288
26	172	0.520559
26	174	0.386813
26	175	0.514835
26	176	0.416071
26	177	0.486218
26	179	0.322253
26	180	0.306868
26	181	0.384753
26	184	0.391163
26	185	0.320467
26	186	0.356364
26	188	0.547756
26	190	0.315842
26	191	0.462866
26	193	0.419734
26	195	0.375733
26	197	0.370055
26	200	0.374588
26	207	0.47848
26	208	0.470971
26	209	0.439057
26	213	0.362317
26	215	0.526053
26	216	0.501236
26	217	0.304853
26	222	0.33109
26	225	0.389515
26	226	0.554808
26	227	0.338324
26	230	0.473306
26	233	0.438324
26	235	0.456548
26	236	0.40772
26	237	0.403571
27	28	0.476099
27	29	0.516758
27	30	0.362592
27	35	0.463261
27	36	0.627381
27	37	0.390522
27	40	0.410668
27	42	0.5413
27	43	0.503114
27	44	0.351007
27	48	0.464057
27	50	0.463507
27	54	0.347848
27	58	0.661676
27	60	0.432234
27	61	0.39913
27	65	0.326053
27	66	0.361951
27	70	0.517353
27	71	0.583929
27	73	0.374038
27	74	0.483333
27	75	0.571337
27	78	0.324405
27	80	0.539057
27	81	0.482463
27	82	0.516209
[truncated: 6,531 more rows]

## Sheet: Location0.4
1	4	0.537134
1	5	0.580952
1	7	0.592308
1	8	0.426603
1	10	0.515888
1	11	0.573214
1	14	0.429579
1	18	0.56685
1	20	0.416026
1	21	0.462179
1	23	0.425778
1	24	0.577335
1	26	0.529258
1	27	0.583608
1	29	0.469322
1	30	0.415614
1	36	0.656548
1	42	0.412775
1	43	0.510989
1	50	0.532005
1	58	0.638416
1	60	0.55641
1	61	0.405815
1	66	0.42587
1	70	0.535577
1	71	0.537225
1	74	0.43141
1	75	0.456639
1	78	0.419505
1	80	0.508013
1	81	0.560073
1	82	0.420971
1	83	0.500916
1	90	0.409478
1	92	0.425549
1	93	0.439377
1	94	0.40609
1	101	0.518727
1	103	0.535394
1	105	0.430128
1	110	0.47033
1	113	0.531462
1	114	0.53576
1	116	0.502976
1	121	0.551511
1	126	0.662821
1	128	0.467537
1	129	0.449771
1	131	0.424313
1	134	0.49043
1	137	0.490568
1	141	0.548672
1	144	0.589744
1	145	0.409066
1	146	0.438004
1	147	0.54707
1	148	0.546474
1	150	0.495971
1	153	0.493773
1	156	0.487866
1	157	0.635394
1	163	0.520696
1	165	0.553022
1	171	0.55119
1	172	0.547665
1	173	0.40522
1	174	0.451282
1	175	0.574405
1	176	0.493636
1	177	0.426877
1	181	0.481273
1	188	0.496886
1	193	0.404991
1	195	0.417949
1	197	0.441987
1	199	0.411447
1	200	0.511676
1	207	0.535073
1	208	0.453342
1	209	0.533104
1	213	0.403159
1	215	0.484661
1	226	0.608471
1	231	0.432738
1	233	0.468727
1	235	0.437408
1	237	0.465156
1	239	0.470879
1	240	0.410165
2	17	0.414744
3	5	0.426419
3	7	0.546429
3	23	0.439789
3	24	0.500092
3	27	0.417216
3	36	0.424588
3	44	0.411401
3	58	0.406914
3	66	0.486172
3	74	0.457051
3	76	0.475412
3	81	0.418681
3	83	0.47207
3	103	0.416529
3	114	0.517308
3	127	0.411676
3	128	0.449222
3	134	0.494872
3	144	0.447619
3	147	0.437225
3	149	0.426648
3	157	0.493452
3	166	0.440751
3	170	0.497436
3	175	0.421429
3	208	0.464973
3	226	0.559249
3	235	0.489286
3	237	0.409112
4	5	0.577839
4	7	0.507784
4	10	0.594918
4	11	0.45696
4	18	0.745467
4	19	0.597024
4	21	0.656685
4	22	0.487179
4	24	0.451603
4	27	0.472665
4	28	0.618498
4	29	0.457875
4	35	0.624824
4	36	0.608791
4	41	0.586722
4	43	0.526694
4	48	0.683974
4	51	0.543681
4	58	0.502793
4	60	0.546291
4	63	0.449908
4	70	0.56337
4	71	0.544918
4	75	0.500778
4	78	0.524451
4	80	0.585302
4	81	0.62381
4	82	0.466346
4	92	0.564057
4	100	0.453114
4	101	0.583333
4	105	0.661538
4	110	0.474084
4	113	0.662393
4	116	0.581685
4	121	0.698718
4	126	0.50957
4	131	0.619643
4	137	0.447711
4	138	0.507921
4	141	0.628617
4	143	0.402244
4	144	0.53196
4	154	0.50467
4	156	0.542857
4	157	0.575366
4	158	0.531273
4	161	0.488278
4	163	0.630174
4	165	0.580907
4	171	0.567033
4	172	0.722161
4	175	0.590156
4	181	0.454899
4	184	0.499679
4	185	0.501282
4	188	0.519963
4	193	0.584478
4	195	0.619963
4	196	0.522299
4	197	0.633883
4	199	0.441712
4	200	0.611218
4	201	0.603578
4	202	0.646795
4	207	0.66891
4	213	0.519597
4	215	0.427656
4	216	0.474542
4	220	0.486081
4	225	0.407051
4	230	0.566484
4	233	0.712042
4	239	0.533883
5	7	0.661035
5	9	0.497299
5	10	0.519689
5	11	0.607463
5	14	0.425
5	18	0.497894
5	19	0.531319
5	21	0.47413
5	22	0.437225
5	23	0.491621
5	24	0.634524
5	26	0.454533
5	27	0.607555
5	29	0.645833
5	36	0.681822
5	37	0.481136
5	42	0.429808
5	43	0.529258
5	48	0.485806
5	58	0.611218
5	60	0.483608
5	61	0.579533
5	70	0.657097
5	71	0.737866
5	74	0.463233
5	75	0.629167
5	78	0.530861
5	80	0.62239
5	81	0.438462
5	82	0.569139
5	83	0.632005
5	90	0.661447
5	91	0.489332
5	92	0.414332
5	93	0.424679
5	100	0.410348
5	101	0.492903
5	103	0.530037
5	113	0.485537
5	114	0.5913
5	121	0.535714
5	122	0.436978
5	124	0.486676
5	126	0.656822
5	127	0.442903
5	128	0.538278
5	129	0.477701
5	131	0.516621
5	134	0.607738
5	137	0.491255
5	138	0.502106
5	141	0.522894
5	143	0.430632
5	144	0.589469
5	147	0.591804
5	148	0.454716
5	149	0.489652
5	150	0.594734
5	151	0.435348
5	153	0.418269
5	154	0.513553
5	156	0.719963
5	157	0.6087
5	163	0.616804
5	165	0.563507
5	166	0.445238
5	171	0.529487
5	172	0.589057
5	175	0.70783
5	177	0.476786
5	179	0.413278
5	181	0.528755
5	184	0.607051
5	188	0.483883
5	190	0.429029
5	193	0.48196
5	195	0.464744
5	197	0.461859
5	199	0.427793
5	200	0.503984
5	201	0.424043
5	207	0.707326
5	208	0.459478
5	209	0.458654
5	213	0.470101
5	215	0.546612
5	226	0.56543
5	231	0.429625
5	233	0.408471
5	235	0.531731
5	236	0.506599
5	237	0.620147
5	239	0.44707
6	54	0.461767
7	10	0.547024
7	11	0.466758
7	18	0.495101
7	19	0.596108
7	21	0.64533
7	23	0.449084
7	24	0.699634
7	26	0.608013
7	27	0.564881
7	29	0.696337
7	36	0.710531
7	37	0.513095
7	40	0.440064
7	42	0.516575
7	43	0.485623
7	44	0.591117
7	48	0.460211
7	58	0.617628
7	60	0.446154
7	61	0.578755
7	65	0.470101
7	66	0.429121
7	70	0.605357
7	71	0.692857
7	73	0.408379
7	74	0.604716
7	75	0.497436
7	78	0.502885
7	80	0.673718
7	81	0.549405
7	82	0.543727
7	83	0.554899
7	90	0.605082
7	91	0.439332
7	92	0.424817
7	94	0.474634
7	101	0.63402
7	103	0.598718
7	105	0.436355
7	113	0.485582
7	114	0.619826
7	116	0.403846
7	118	0.410119
7	121	0.575733
7	124	0.53956
7	126	0.646108
7	127	0.628846
7	128	0.505952
7	134	0.721749
7	137	0.410485
7	138	0.429487
7	139	0.45522
7	141	0.501007
7	144	0.55609
7	145	0.465201
7	146	0.44707
7	147	0.681685
7	148	0.505723
7	149	0.521154
7	150	0.660806
7	151	0.504853
7	153	0.421291
7	156	0.705769
7	157	0.579441
7	163	0.682692
7	165	0.53489
7	166	0.50119
7	171	0.506685
7	172	0.605952
7	175	0.686859
7	177	0.483333
7	179	0.498077
7	181	0.505723
7	184	0.591804
7	185	0.497711
7	188	0.646612
7	189	0.422848
7	190	0.457463
7	193	0.55815
7	195	0.464011
7	197	0.408929
7	199	0.411722
7	200	0.526877
7	207	0.691667
7	208	0.539423
7	209	0.454167
7	213	0.462042
7	215	0.507189
7	216	0.527793
7	226	0.646566
7	227	0.492949
7	230	0.413049
7	231	0.548077
7	233	0.476877
7	235	0.674084
7	236	0.445518
7	237	0.48544
7	239	0.472161
8	23	0.485027
8	36	0.499038
8	58	0.537408
8	60	0.435714
8	103	0.429579
8	114	0.405632
8	124	0.435119
8	144	0.45206
8	148	0.429625
8	153	0.54217
8	157	0.491896
8	158	0.442995
8	170	0.456456
8	171	0.500275
8	175	0.406136
8	176	0.430678
8	181	0.488324
8	188	0.478342
8	207	0.422711
8	226	0.584707
9	37	0.501099
9	66	0.412683
9	70	0.509478
9	75	0.526786
9	156	0.408288
9	207	0.414103
9	215	0.483288
9	236	0.442565
10	18	0.565385
10	19	0.555357
10	21	0.613553
10	22	0.464194
10	24	0.6125
10	26	0.450229
10	27	0.575916
10	28	0.444322
10	29	0.492537
10	36	0.496703
10	37	0.445147
10	42	0.419505
10	43	0.584478
10	44	0.490614
10	48	0.497894
10	58	0.549405
10	61	0.451786
10	65	0.472894
10	70	0.498672
10	71	0.410027
10	75	0.544414
10	80	0.567628
10	81	0.516438
10	83	0.5587
10	90	0.433471
10	93	0.446703
10	94	0.480861
10	101	0.568452
10	105	0.571978
10	113	0.424959
10	116	0.49272
10	121	0.651557
10	126	0.458333
10	127	0.443819
10	128	0.521337
10	131	0.444277
10	134	0.425137
10	135	0.408883
10	141	0.601236
10	144	0.517445
10	147	0.449176
10	150	0.525641
10	154	0.461676
10	156	0.612821
10	157	0.496749
10	162	0.434203
10	163	0.622161
10	165	0.532921
10	171	0.589744
10	172	0.696749
10	175	0.484112
10	176	0.412088
10	184	0.401557
10	185	0.557967
10	188	0.503892
10	193	0.535394
10	195	0.500321
10	196	0.464377
10	199	0.431044
10	200	0.566896
10	201	0.440252
10	207	0.548214
10	213	0.583974
10	225	0.458929
10	226	0.501465
10	230	0.447299
10	233	0.692674
10	235	0.400504
10	239	0.555907
10	240	0.418681
11	18	0.422207
11	19	0.511951
11	21	0.519231
11	22	0.448581
11	23	0.458562
11	24	0.407234
11	26	0.432463
11	27	0.519734
11	29	0.589606
11	36	0.552564
11	42	0.496932
11	43	0.461905
11	58	0.422482
11	60	0.402839
11	61	0.522344
11	70	0.455632
11	71	0.615659
11	75	0.508974
11	80	0.591667
11	82	0.455311
11	89	0.410897
11	90	0.618956
11	93	0.460027
11	94	0.420788
11	100	0.401786
11	101	0.465293
11	103	0.451832
11	105	0.437088
11	112	0.415733
11	113	0.429813
11	121	0.520147
11	124	0.404808
11	126	0.49739
11	127	0.432555
11	128	0.437592
11	129	0.421062
11	134	0.628709
11	137	0.510302
11	141	0.421337
11	144	0.465568
11	146	0.464835
11	147	0.532555
11	148	0.479945
11	149	0.420238
11	150	0.613736
11	151	0.512088
11	156	0.596612
11	157	0.4212
11	159	0.53196
11	162	0.440064
11	163	0.531822
11	165	0.447756
11	171	0.434524
11	172	0.506227
11	174	0.410485
11	175	0.632005
11	177	0.545833
11	179	0.449222
11	181	0.487775
11	184	0.403846
11	185	0.446566
11	188	0.480082
11	189	0.502701
11	193	0.436951
11	197	0.538507
11	200	0.407143
11	207	0.656914
11	208	0.40119
11	215	0.54707
11	216	0.473581
11	225	0.554625
11	226	0.509936
11	230	0.416712
11	231	0.401374
11	235	0.550092
11	236	0.565414
11	237	0.547756
12	54	0.433379
12	102	0.452335
13	15	0.663553
13	45	0.46131
13	46	0.482784
13	56	0.483929
13	59	0.630357
13	85	0.58196
13	95	0.658471
13	96	0.561584
13	99	0.645726
13	108	0.564103
13	120	0.508654
13	155	0.589835
13	164	0.506548
13	168	0.582738
13	169	0.601832
13	180	0.718864
13	192	0.469368
13	203	0.561126
13	205	0.557738
13	210	0.580952
13	212	0.594689
13	214	0.537179
13	221	0.517125
13	235	0.409615
13	238	0.509799
14	18	0.429029
14	24	0.403297
14	25	0.506914
14	27	0.46337
14	29	0.445147
14	30	0.417628
14	33	0.415293
14	60	0.477976
14	63	0.516255
14	113	0.577456
14	121	0.440522
14	126	0.511859
14	137	0.436722
14	141	0.415522
14	172	0.554533
14	173	0.447115
14	175	0.474222
14	184	0.422619
15	38	0.487179
15	45	0.523306
15	46	0.646749
15	52	0.451007
15	56	0.669093
15	59	0.787042
15	77	0.410302
15	85	0.623168
15	95	0.624954
15	96	0.604029
15	98	0.481548
15	99	0.727069
15	106	0.475733
15	108	0.51076
15	120	0.635943
15	155	0.573581
15	168	0.677381
15	169	0.676603
15	180	0.7212
15	192	0.416987
15	202	0.41978
15	203	0.624863
15	205	0.72239
15	210	0.863965
15	212	0.595788
15	214	0.484982
15	221	0.567995
15	229	0.461676
15	238	0.576832
16	38	0.447161
16	68	0.451923
16	94	0.424313
16	164	0.463782
16	178	0.635852
16	182	0.554945
17	64	0.425137
17	117	0.509936
18	19	0.630952
18	21	0.666346
18	22	0.474634
18	23	0.518407
18	24	0.471978
18	27	0.564148
18	28	0.547756
18	29	0.586676
18	35	0.676725
18	36	0.512363
18	41	0.546932
18	42	0.417628
18	43	0.579716
18	44	0.413004
18	48	0.708013
18	50	0.42033
18	51	0.555037
18	58	0.485989
18	60	0.554121
18	63	0.456181
18	70	0.524359
18	71	0.536905
18	75	0.547115
18	78	0.511676
18	80	0.570604
18	81	0.646383
18	83	0.475824
18	91	0.438278
18	92	0.584661
18	101	0.501694
18	105	0.752564
18	110	0.440156
18	113	0.602228
18	116	0.583471
18	121	0.733288
18	122	0.417335
18	126	0.490888
18	131	0.582555
18	134	0.462958
18	137	0.447207
18	138	0.635852
18	141	0.672711
18	144	0.502564
18	148	0.485531
18	154	0.542079
18	156	0.521154
18	157	0.614057
18	158	0.401877
18	161	0.528984
18	163	0.656227
18	165	0.533471
18	171	0.526511
18	172	0.695879
18	173	0.531914
18	175	0.545925
18	176	0.480815
18	178	0.434295
18	184	0.41543
18	185	0.451328
18	188	0.521429
18	193	0.518407
18	195	0.548672
18	197	0.475092
18	200	0.655495
18	201	0.595016
18	202	0.602335
18	207	0.632005
18	209	0.408929
18	213	0.549908
18	215	0.588919
18	216	0.488278
18	220	0.476145
18	225	0.447482
18	230	0.476648
18	233	0.735073
18	239	0.529167
18	240	0.422344
19	21	0.694597
19	22	0.584112
19	23	0.482601
19	24	0.5375
19	26	0.456319
19	27	0.528205
19	29	0.588782
19	35	0.603578
19	36	0.533471
19	42	0.45641
19	43	0.518452
19	44	0.554808
19	48	0.579487
19	58	0.44881
19	60	0.452198
19	61	0.525595
19	70	0.567857
19	71	0.492903
19	75	0.563599
19	78	0.501236
19	80	0.620696
19	81	0.539194
19	82	0.459158
19	83	0.453938
19	90	0.427656
19	91	0.569139
19	92	0.409386
19	101	0.472436
19	105	0.64565
19	114	0.425595
19	116	0.417903
19	118	0.439835
19	121	0.560577
19	126	0.486172
19	131	0.515293
19	134	0.558059
19	137	0.404441
19	138	0.509936
19	140	0.447985
19	141	0.548306
19	144	0.513324
19	148	0.43109
19	150	0.507326
19	154	0.478297
19	156	0.583059
19	157	0.492674
19	158	0.629853
19	159	0.473352
19	161	0.475458
19	162	0.435348
19	163	0.675595
19	165	0.471108
19	172	0.615293
19	173	0.540888
19	175	0.557555
19	178	0.419826
19	181	0.416484
19	185	0.518681
19	188	0.639103
19	189	0.420375
19	193	0.457967
19	195	0.476648
19	197	0.550595
19	200	0.626465
19	207	0.599176
19	213	0.4375
19	215	0.539286
19	216	0.498855
19	220	0.475549
19	225	0.54098
19	226	0.448993
19	230	0.457234
19	233	0.640385
19	239	0.467582
19	242	0.403388
20	23	0.481364
20	24	0.488645
20	30	0.510302
20	36	0.467399
20	43	0.452152
20	46	0.510073
20	58	0.496337
20	61	0.417216
20	64	0.491392
20	66	0.538004
20	70	0.485394
20	77	0.412866
20	85	0.453938
20	93	0.509753
20	96	0.457234
20	97	0.453709
20	98	0.46044
20	101	0.43663
20	104	0.520879
20	120	0.527015
20	140	0.589515
20	142	0.457921
20	145	0.450137
20	149	0.445971
20	152	0.41685
20	154	0.415476
20	157	0.402152
20	166	0.423855
20	168	0.452152
20	169	0.480769
20	170	0.451328
20	173	0.410668
20	187	0.438828
20	188	0.438599
20	194	0.482555
20	199	0.465797
20	203	0.442857
20	206	0.459615
20	210	0.407921
20	223	0.49217
20	229	0.505998
20	235	0.457784
20	242	0.517308
21	22	0.466209
21	23	0.461584
21	24	0.499771
21	26	0.447711
21	27	0.467033
21	28	0.402335
21	29	0.622573
21	35	0.560446
21	36	0.588278
21	42	0.441529
21	43	0.591392
21	44	0.542766
21	48	0.637592
21	51	0.420055
21	58	0.509844
21	61	0.461355
21	70	0.601328
21	71	0.598581
21	75	0.499222
21	78	0.523947
21	80	0.633929
21	81	0.531822
21	82	0.421612
21	83	0.496291
21	91	0.560943
21	92	0.486264
21	93	0.401923
21	101	0.610943
21	105	0.685027
21	110	0.410302
21	113	0.441489
21	114	0.432555
21	116	0.487179
21	121	0.704029
21	126	0.506639
21	131	0.404029
21	134	0.564744
21	138	0.553984
21	141	0.501648
21	144	0.515751
21	148	0.452564
21	149	0.402473
21	150	0.574267
21	153	0.427335
21	154	0.496658
21	156	0.597161
21	157	0.554029
21	158	0.407509
21	159	0.429441
21	161	0.46978
21	162	0.405815
21	163	0.69185
21	165	0.542353
21	171	0.48109
21	172	0.607967
21	173	0.447024
21	175	0.578892
21	176	0.436813
21	178	0.438095
21	184	0.450549
21	185	0.542995
21	188	0.643636
21	193	0.588874
21	195	0.461126
21	197	0.505403
21	199	0.420696
21	200	0.600962
21	202	0.404258
21	207	0.661813
21	209	0.427885
21	213	0.549405
21	215	0.517582
21	216	0.538187
21	220	0.402747
21	225	0.539377
21	226	0.466163
21	227	0.438416
21	230	0.505449
21	233	0.596841
21	239	0.552839
21	242	0.424359
22	23	0.478938
22	27	0.446658
22	29	0.431822
22	30	0.416026
22	35	0.470495
22	43	0.430311
22	44	0.432051
22	48	0.487729
22	54	0.531273
22	57	0.555311
22	58	0.438004
22	63	0.405907
22	65	0.40293
22	71	0.425641
22	80	0.436081
22	81	0.422299
22	94	0.518773
22	97	0.441026
22	101	0.446474
22	102	0.459707
22	104	0.547802
22	116	0.457738
22	121	0.439973
22	134	0.462363
22	137	0.543132
22	140	0.519551
22	143	0.451145
22	146	0.638553
22	148	0.416941
22	149	0.441712
22	150	0.425275
22	157	0.445147
22	159	0.615751
22	162	0.449267
22	163	0.464973
22	172	0.481685
22	175	0.41804
22	178	0.469139
22	185	0.587179
22	188	0.469048
22	189	0.583654
22	193	0.404762
22	194	0.404304
22	195	0.442857
22	200	0.433929
22	207	0.535668
22	225	0.782463
22	226	0.405449
22	227	0.476374
22	230	0.476603
22	233	0.432234
22	239	0.494734
22	242	0.452656
22	243	0.556181
23	24	0.540568
23	26	0.404808
23	27	0.461538
23	28	0.444048
23	35	0.40756
23	36	0.524267
23	40	0.424725
23	42	0.529029
23	43	0.555907
23	44	0.434295
23	48	0.503709
23	53	0.499817
23	58	0.616071
23	66	0.416071
23	71	0.525412
23	80	0.589789
23	81	0.510623
23	91	0.485714
23	92	0.440522
23	101	0.415568
23	114	0.543132
23	118	0.551053
23	121	0.513233
23	122	0.441466
23	134	0.485577
23	138	0.451511
23	140	0.452885
23	144	0.431639
23	147	0.420879
23	148	0.43402
23	150	0.48402
23	154	0.467628
23	156	0.45609
23	157	0.492949
23	163	0.494093
23	170	0.415568
23	173	0.525137
23	175	0.516163
23	177	0.436951
23	181	0.449542
23	188	0.558425
23	193	0.444322
23	207	0.543315
23	209	0.44794
23	215	0.503617
23	216	0.483196
23	226	0.515751
23	227	0.475137
23	230	0.409249
23	240	0.411905
24	27	0.698352
24	29	0.445513
24	36	0.665751
24	37	0.439377
24	42	0.539973
24	43	0.45467
24	44	0.516667
24	48	0.411813
24	58	0.7038
24	60	0.50261
24	61	0.592033
24	70	0.641896
24	71	0.513462
24	74	0.46891
24	75	0.449863
24	80	0.54707
24	81	0.552198
24	82	0.506685
24	83	0.499359
24	90	0.529121
24	91	0.496978
24	94	0.490568
24	97	0.416209
24	101	0.500595
24	103	0.491667
24	105	0.402518
24	111	0.401099
24	114	0.558196
24	118	0.499267
24	121	0.498581
24	126	0.537592
24	127	0.448535
24	128	0.536401
24	134	0.544048
24	135	0.402656
24	141	0.543132
24	144	0.566438
24	147	0.529121
24	148	0.42587
24	150	0.532326
24	152	0.414606
24	154	0.505678
24	156	0.600504
24	157	0.598718
24	163	0.521108
24	165	0.53283
24	168	0.403068
24	169	0.403755
24	170	0.437775
24	171	0.622115
24	172	0.514652
24	175	0.537042
24	176	0.436538
24	181	0.459112
24	185	0.433242
24	188	0.596474
24	189	0.42239
24	190	0.461951
24	193	0.415476
24	194	0.433516
24	195	0.416026
24	199	0.574588
24	200	0.51946
24	207	0.542445
24	208	0.436538
24	209	0.56946
24	213	0.435211
24	215	0.468498
24	226	0.61772
24	231	0.48837
24	233	0.416209
24	235	0.499084
24	237	0.542079
24	239	0.53489
25	63	0.417995
25	117	0.415476
26	27	0.4663
26	28	0.426007
26	29	0.54478
26	36	0.554121
26	40	0.426328
26	42	0.579991
26	43	0.540018
26	44	0.496795
26	48	0.512821
26	58	0.455495
26	71	0.487225
26	74	0.438874
26	75	0.503709
26	78	0.512637
26	80	0.574771
26	81	0.551374
26	82	0.416071
26	83	0.485394
26	90	0.42674
26	91	0.458059
26	92	0.548031
26	93	0.474084
26	100	0.467537
26	101	0.463645
26	103	0.432418
26	105	0.472344
26	113	0.402912
26	114	0.580861
26	116	0.426923
26	121	0.442491
26	124	0.454991
26	126	0.535714
26	128	0.488736
26	131	0.453984
26	134	0.633288
26	137	0.404487
26	144	0.47619
26	145	0.429212
26	147	0.514423
26	148	0.534615
26	150	0.497802
26	153	0.516896
26	156	0.484661
26	157	0.451465
26	163	0.660485
26	165	0.404853
26	172	0.520559
26	175	0.514835
26	176	0.416071
26	177	0.486218
26	188	0.547756
26	191	0.462866
26	193	0.419734
26	207	0.47848
26	208	0.470971
26	209	0.439057
26	215	0.526053
26	216	0.501236
26	226	0.554808
26	230	0.473306
26	233	0.438324
26	235	0.456548
26	236	0.40772
26	237	0.403571
27	28	0.476099
27	29	0.516758
27	35	0.463261
27	36	0.627381
27	40	0.410668
27	42	0.5413
27	43	0.503114
27	48	0.464057
27	50	0.463507
27	58	0.661676
27	60	0.432234
27	70	0.517353
27	71	0.583929
27	74	0.483333
27	75	0.571337
27	80	0.539057
27	81	0.482463
27	82	0.516209
27	83	0.505128
27	90	0.491896
27	91	0.515842
27	92	0.462546
27	94	0.436264
27	100	0.459982
27	101	0.574222
27	103	0.523031
27	105	0.532189
27	112	0.426172
27	113	0.434849
27	114	0.58109
27	116	0.522115
27	121	0.560027
27	124	0.441712
27	126	0.459615
27	127	0.426832
27	128	0.544048
27	134	0.567903
27	135	0.410577
27	137	0.488049
27	138	0.462546
27	141	0.50261
27	144	0.666667
27	146	0.413874
27	147	0.617674
27	148	0.561035
27	149	0.425641
27	150	0.520559
27	151	0.411951
27	154	0.560943
27	156	0.563599
27	157	0.661035
27	163	0.568498
27	165	0.599908
27	171	0.685027
27	172	0.638095
27	175	0.611676
27	176	0.444322
27	177	0.445192
27	179	0.470147
27	181	0.429899
27	185	0.496245
27	186	0.441484
27	188	0.605815
27	190	0.451557
27	195	0.512408
27	200	0.489148
27	201	0.429149
27	207	0.615797
27	208	0.425183
27	209	0.5587
27	213	0.493819
27	215	0.619643
27	226	0.594048
27	231	0.450595
27	233	0.487821
27	235	0.432601
27	237	0.586126
27	239	0.523214
27	240	0.433196
28	35	0.535377
28	36	0.45261
28	43	0.467949
28	48	0.585119
28	51	0.419643
28	58	0.503068
28	81	0.530998
28	92	0.484844
28	100	0.426969
28	101	0.480082
28	105	0.552564
28	110	0.436081
28	113	0.406575
28	114	0.408471
28	116	0.520421
28	121	0.531044
28	131	0.583791
28	138	0.485577
28	141	0.504029
28	144	0.487271
28	154	0.558883
28	157	0.482967
28	158	0.423489
28	163	0.541987
28	171	0.425321
28	172	0.536264
28	175	0.463599
28	188	0.43141
28	195	0.437912
28	201	0.54529
28	202	0.546474
28	207	0.445147
28	215	0.406639
28	233	0.495696
28	239	0.412408
28	240	0.437179
29	35	0.471159
29	36	0.556319
29	37	0.442353
29	42	0.572802
29	43	0.491667
29	44	0.45641
29	48	0.529258
29	51	0.429625
29	61	0.491392
29	65	0.445696
29	70	0.464057
29	71	0.668544
29	74	0.501648
29	75	0.608242
29	78	0.448077
29	80	0.601328
29	81	0.427427
29	82	0.500687
29	83	0.463553
29	90	0.5788
29	91	0.458196
29	92	0.540247
29	93	0.424542
29	101	0.497619
29	103	0.450366
29	105	0.50293
29	113	0.59758
29	121	0.670467
29	122	0.427248
29	124	0.591209
29	126	0.684753
29	127	0.459066
29	128	0.464652
29	129	0.432601
29	131	0.557418
29	134	0.671062
29	137	0.477885
29	138	0.545513
29	139	0.414057
29	141	0.539973
29	144	0.573443
29	146	0.416117
29	147	0.596062
29	148	0.588095
29	149	0.544185
29	150	0.665339
29	151	0.593727
29	156	0.665751
29	157	0.48869
29	163	0.727656
29	165	0.505082
29	166	0.419643
29	171	0.447344
29	172	0.705678
29	173	0.401694
29	175	0.694872
29	177	0.528022
29	184	0.485211
29	185	0.460623
29	188	0.496703
29	189	0.449542
29	193	0.52152
29	195	0.465201
29	197	0.489377
29	200	0.607692
29	201	0.435765
29	207	0.670879
29	208	0.451007
29	213	0.520421
29	215	0.564927
29	216	0.45641
29	225	0.565659
29	226	0.540797
29	230	0.533242
29	231	0.401419
29	233	0.537775
29	235	0.630495
29	236	0.486956
29	237	0.436859
29	242	0.427473
30	39	0.452564
30	55	0.585302
30	58	0.460256
30	64	0.555586
30	66	0.654808
30	89	0.505769
30	94	0.407555
30	101	0.478846
30	104	0.480952
30	115	0.553114
30	137	0.441758
30	140	0.410119
30	142	0.566804
30	145	0.582967
30	146	0.592079
30	152	0.461493
30	173	0.462271
30	183	0.404625
30	193	0.52152
30	194	0.418773
30	204	0.582676
30	206	0.512179
30	207	0.409203
30	223	0.46891
30	225	0.419689
30	227	0.443407
30	235	0.414835
30	241	0.422985
30	242	0.43457
31	74	0.424359
31	190	0.429899
32	115	0.485302
32	117	0.537317
33	117	0.571245
33	211	0.632005
35	36	0.428347
35	41	0.508225
35	43	0.531645
35	48	0.613446
35	51	0.556279
35	58	0.488215
35	60	0.43549
35	70	0.425509
35	71	0.539406
35	75	0.474181
35	78	0.512964
35	80	0.449524
35	81	0.610653
35	88	0.430797
35	92	0.623588
35	100	0.426333
35	105	0.602892
35	110	0.589819
35	113	0.473362
35	114	0.417587
35	116	0.583844
35	121	0.517108
35	131	0.68879
35	137	0.453851
35	138	0.592429
35	141	0.474776
35	144	0.445358
35	148	0.539841
35	156	0.424181
35	157	0.486407
35	158	0.46072
35	161	0.472876
35	163	0.565002
35	165	0.450784
35	172	0.62226
35	175	0.451699
35	178	0.533408
35	188	0.527204
35	193	0.476722
35	196	0.400142
35	197	0.584256
35	200	0.564979
35	201	0.614368
35	202	0.533706
35	207	0.563399
35	215	0.472739
35	216	0.440023
35	220	0.429103
35	225	0.444511
35	230	0.51088
35	233	0.544351
35	239	0.443572
36	37	0.402839
36	40	0.499588
36	42	0.502839
36	43	0.567995
36	44	0.433471
36	48	0.467033
36	50	0.487683
36	58	0.716117
36	60	0.487683
36	61	0.553342
36	70	0.590888
36	71	0.703114
36	74	0.456044
36	75	0.479853
36	78	0.506227
36	80	0.625504
36	81	0.691392
36	82	0.523031
36	83	0.537408
36	90	0.586264
36	91	0.556181
36	92	0.588828
36	93	0.497527
36	100	0.454487
36	101	0.630861
36	103	0.560165
36	105	0.513095
36	109	0.463278
36	110	0.642216
36	111	0.404441
36	112	0.43675
36	113	0.48169
36	114	0.616712
36	116	0.5212
36	118	0.405311
36	121	0.622436
36	122	0.455202
36	123	0.455907
36	124	0.464927
36	126	0.659615
36	127	0.446658
36	128	0.441575
36	129	0.473443
36	134	0.554258
36	136	0.404583
36	138	0.460989
36	139	0.428755
36	140	0.407463
36	141	0.503297
36	144	0.737454
36	145	0.441667
36	147	0.582418
36	148	0.617949
36	150	0.506502
36	151	0.446612
36	153	0.471932
36	154	0.555769
36	156	0.65119
36	157	0.720513
36	163	0.630403
36	165	0.633288
36	170	0.484341
36	171	0.638187
36	172	0.55293
36	175	0.704487
36	176	0.476786
36	177	0.501694
36	181	0.658104
36	188	0.718407
36	191	0.435623
36	193	0.51511
36	195	0.472344
36	197	0.565797
36	199	0.442628
36	200	0.546841
36	201	0.509988
36	207	0.728663
36	208	0.449038
36	209	0.641712
36	213	0.538599
36	215	0.512408
36	216	0.494505
36	226	0.643315
36	230	0.408837
36	231	0.441667
36	233	0.524267
36	235	0.467903
36	236	0.517565
36	237	0.586081
36	239	0.568361
37	50	0.415568
37	58	0.468773
37	61	0.482005
37	70	0.436859
37	71	0.472665
37	74	0.405678
37	75	0.472802
37	78	0.415064
37	83	0.47239
37	90	0.439881
37	103	0.439515
37	114	0.496291
37	122	0.422601
37	124	0.447253
37	128	0.455998
37	134	0.456731
37	145	0.452885
37	147	0.535348
37	149	0.433516
37	150	0.529304
37	156	0.539469
37	157	0.4788
37	163	0.427381
37	166	0.44739
37	175	0.455037
37	184	0.411859
37	189	0.409707
37	193	0.432509
37	207	0.538324
37	213	0.438782
37	215	0.45522
37	217	0.442995
37	226	0.567445
37	231	0.445925
37	235	0.471108
37	236	0.464131
38	46	0.664286
38	56	0.660943
38	59	0.484066
38	77	0.538049
38	85	0.89533
38	95	0.831685
38	96	0.903297
38	97	0.78544
38	98	0.858288
38	99	0.584553
38	104	0.405495
38	106	0.564927
38	111	0.455174
38	120	0.541392
38	155	0.809982
38	168	0.750549
38	169	0.718864
38	180	0.403114
38	194	0.46717
38	199	0.463553
38	203	0.893132
38	205	0.527427
38	210	0.58402
38	212	0.479396
38	214	0.765751
38	221	0.676786
38	229	0.56717
38	238	0.528297
39	54	0.449451
39	55	0.410256
39	64	0.407967
39	89	0.415888
39	97	0.401969
39	115	0.424359
39	142	0.562363
39	146	0.434982
39	189	0.478663
39	223	0.403938
39	232	0.423626
40	42	0.427656
40	43	0.411355
40	58	0.461584
40	62	0.444597
40	71	0.494002
40	74	0.449542
40	80	0.420971
40	112	0.429996
40	114	0.414927
40	126	0.444505
40	128	0.400641
40	144	0.423397
40	147	0.541255
40	148	0.475595
40	150	0.51337
40	156	0.457372
40	157	0.438874
40	174	0.46685
40	175	0.425137
40	177	0.402656
40	179	0.526374
40	188	0.440659
40	191	0.482097
40	193	0.408745
40	207	0.45815
40	208	0.476557
40	209	0.420375
40	215	0.439194
40	226	0.59478
40	230	0.430266
40	231	0.469505
40	236	0.426104
41	48	0.448031
41	51	0.498535
41	52	0.437271
41	81	0.466896
41	102	0.431639
41	105	0.484661
41	113	0.401813
41	121	0.413095
41	131	0.423626
41	158	0.465385
41	164	0.41076
41	172	0.440339
41	178	0.408883
41	196	0.403846
41	197	0.431593
41	200	0.403159
41	201	0.459758
41	202	0.711035
41	220	0.611126
41	233	0.569322
42	43	0.491941
42	44	0.514515
42	48	0.41163
42	61	0.409066
42	71	0.577152
42	75	0.488187
42	80	0.53054
42	82	0.407326
42	90	0.497344
42	91	0.534341
42	92	0.503709
42	93	0.412637
42	100	0.421612
42	103	0.426007
42	114	0.51685
42	118	0.437225
42	121	0.420238
42	122	0.425966
42	124	0.453571
42	126	0.486538
42	128	0.430998
42	134	0.603846
42	137	0.404579
42	138	0.424954
42	139	0.407143
42	144	0.414148
42	147	0.574359
42	148	0.511264
42	150	0.54043
42	151	0.460485
42	156	0.600824
42	157	0.40293
42	161	0.440201
42	163	0.665018
42	171	0.451328
42	172	0.467445
42	175	0.521291
42	176	0.47793
42	177	0.439377
42	179	0.407189
42	181	0.425595
42	188	0.568452
42	200	0.505311
42	207	0.534844
42	208	0.439423
42	209	0.449588
42	213	0.47152
42	215	0.592582
42	216	0.495513
42	224	0.429625
42	226	0.633608
42	230	0.481731
42	231	0.42848
42	235	0.435256
42	236	0.517199
42	237	0.472024
43	44	0.454212
43	48	0.538874
43	51	0.473947
43	58	0.648489
43	61	0.480723
43	70	0.459478
43	71	0.580357
43	75	0.454212
43	78	0.54739
43	80	0.57793
43	81	0.498168
43	83	0.445009
43	90	0.43631
43	91	0.458059
43	92	0.497115
43	93	0.535211
43	100	0.41076
43	101	0.513874
43	103	0.418086
43	105	0.502289
43	110	0.485943
43	114	0.43489
43	121	0.536584
43	122	0.418091
43	123	0.423443
43	126	0.555403
43	128	0.412317
43	129	0.417033
43	131	0.478068
43	138	0.452152
43	140	0.517857
43	141	0.466117
43	144	0.540201
43	145	0.491484
43	147	0.435073
43	148	0.403205
43	149	0.470971
43	150	0.57967
43	151	0.43109
43	154	0.402656
43	156	0.635211
43	157	0.658883
43	163	0.642674
43	165	0.503022
43	171	0.42848
43	172	0.527656
43	173	0.473855
43	175	0.515659
43	176	0.433929
43	181	0.502152
43	184	0.523168
43	188	0.50119
43	191	0.446291
43	193	0.496337
43	200	0.470604
43	201	0.536545
43	207	0.549908
43	209	0.485256
43	213	0.54098
43	215	0.586951
43	225	0.521062
43	226	0.517537
43	230	0.468269
43	233	0.517995
43	235	0.404945
43	236	0.409551
43	237	0.442445
43	239	0.484112
44	48	0.459386
44	60	0.470284
44	61	0.405907
44	71	0.443498
44	74	0.442399
44	80	0.563095
44	81	0.515156
44	83	0.451374
44	91	0.497756
44	101	0.470925
44	121	0.474908
44	122	0.427867
44	134	0.587042
44	144	0.41978
44	149	0.414377
44	150	0.507738
44	156	0.437866
44	157	0.429029
44	158	0.460989
44	163	0.610714
44	172	0.468819
44	175	0.445055
44	181	0.458791
44	185	0.425549
44	188	0.493544
44	189	0.417491
44	200	0.463736
44	207	0.460806
44	225	0.47706
44	226	0.479579
44	227	0.425916
44	230	0.46598
44	233	0.45119
44	235	0.425733
45	56	0.528755
45	59	0.534295
45	99	0.479653
45	108	0.55641
45	147	0.424725
45	168	0.466758
45	169	0.454029
45	179	0.402473
45	180	0.552885
45	203	0.413004
45	205	0.600595
45	210	0.578755
45	212	0.401603
45	221	0.592125
46	56	0.565568
46	59	0.61044
46	77	0.486035
46	85	0.814377
46	94	0.423581
46	95	0.717628
46	96	0.79533
46	97	0.70261
46	98	0.732463
46	99	0.716904
46	104	0.53402
46	120	0.68196
46	155	0.740797
46	168	0.734432
46	169	0.703526
46	180	0.501282
46	187	0.436264
46	199	0.436767
46	203	0.723764
46	205	0.533333
46	210	0.702106
46	212	0.484936
46	214	0.622207
46	221	0.487775
46	229	0.537134
46	238	0.486767
47	49	0.430952
47	62	0.41511
47	77	0.484386
47	187	0.417811
47	194	0.413233
47	206	0.420788
47	229	0.447024
48	51	0.447161
48	58	0.419185
48	60	0.551053
48	71	0.43196
48	75	0.585531
48	78	0.494002
48	80	0.6038
48	81	0.57326
48	82	0.475549
48	83	0.447436
48	91	0.561859
48	92	0.63956
48	100	0.417125
48	101	0.556548
48	105	0.69391
48	110	0.419002
48	113	0.502272
48	116	0.531273
48	121	0.569414
48	122	0.496251
48	126	0.439606
48	131	0.620513
48	134	0.529899
48	137	0.486126
48	138	0.65554
48	141	0.607143
48	144	0.572619
48	148	0.416804
48	154	0.445742
48	156	0.496245
48	157	0.503159
48	158	0.46685
48	161	0.499084
48	163	0.667262
48	165	0.47294
48	171	0.470238
48	172	0.572344
48	173	0.468086
48	175	0.619643
48	184	0.468407
48	185	0.446703
48	188	0.525641
48	193	0.555037
48	195	0.603159
48	196	0.410623
48	197	0.565842
48	200	0.611813
48	201	0.517794
48	202	0.523214
48	207	0.652106
48	213	0.504762
48	215	0.569139
48	216	0.576419
48	225	0.402701
48	227	0.468132
48	230	0.511676
48	233	0.687775
48	239	0.511172
48	240	0.450229
49	152	0.417491
49	229	0.448626
50	58	0.564286
50	60	0.425183
50	71	0.425229
50	78	0.512958
50	80	0.422711
50	81	0.442537
50	92	0.463095
50	101	0.43196
50	110	0.522573
50	114	0.434386
50	124	0.400412
50	126	0.406044
50	138	0.439286
50	145	0.415797
50	148	0.403984
50	153	0.455907
50	157	0.6
50	161	0.406227
50	163	0.419231
50	175	0.416117
50	184	0.438462
50	191	0.427244
50	201	0.432194
50	207	0.441117
50	208	0.401282
50	209	0.443956
50	213	0.435073
50	215	0.46717
50	226	0.466896
50	231	0.418544
51	71	0.415797
51	78	0.442949
51	92	0.552106
51	105	0.500321
51	113	0.477936
51	116	0.412729
51	121	0.437592
51	131	0.524634
51	138	0.426694
51	163	0.527885
51	172	0.48457
51	188	0.428297
51	193	0.468452
51	195	0.434661
51	200	0.410256
51	201	0.463467
51	202	0.484982
51	207	0.475366
51	213	0.417766
51	230	0.618361
51	233	0.535668
52	169	0.417308
52	210	0.413416
54	62	0.450595
54	94	0.444048
54	97	0.480128
54	102	0.543727
54	104	0.400733
54	135	0.406364
54	137	0.419048
54	146	0.413233
54	185	0.524451
54	189	0.471383
54	227	0.400137
54	243	0.521841
55	64	0.735714
55	66	0.597848
55	115	0.447527
55	142	0.623718
55	145	0.498947
55	146	0.415797
55	166	0.443498
55	183	0.430815
[truncated: 2,732 more rows]

## Sheet: Location0.5
1	4	0.537134
1	5	0.580952
1	7	0.592308
1	10	0.515888
1	11	0.573214
1	18	0.56685
1	24	0.577335
1	26	0.529258
1	27	0.583608
1	36	0.656548
1	43	0.510989
1	50	0.532005
1	58	0.638416
1	60	0.55641
1	70	0.535577
1	71	0.537225
1	80	0.508013
1	81	0.560073
1	83	0.500916
1	101	0.518727
1	103	0.535394
1	113	0.531462
1	114	0.53576
1	116	0.502976
1	121	0.551511
1	126	0.662821
1	141	0.548672
1	144	0.589744
1	147	0.54707
1	148	0.546474
1	157	0.635394
1	163	0.520696
1	165	0.553022
1	171	0.55119
1	172	0.547665
1	175	0.574405
1	200	0.511676
1	207	0.535073
1	209	0.533104
1	226	0.608471
3	7	0.546429
3	24	0.500092
3	114	0.517308
3	226	0.559249
4	5	0.577839
4	7	0.507784
4	10	0.594918
4	18	0.745467
4	19	0.597024
4	21	0.656685
4	28	0.618498
4	35	0.624824
4	36	0.608791
4	41	0.586722
4	43	0.526694
4	48	0.683974
4	51	0.543681
4	58	0.502793
4	60	0.546291
4	70	0.56337
4	71	0.544918
4	75	0.500778
4	78	0.524451
4	80	0.585302
4	81	0.62381
4	92	0.564057
4	101	0.583333
4	105	0.661538
4	113	0.662393
4	116	0.581685
4	121	0.698718
4	126	0.50957
4	131	0.619643
4	138	0.507921
4	141	0.628617
4	144	0.53196
4	154	0.50467
4	156	0.542857
4	157	0.575366
4	158	0.531273
4	163	0.630174
4	165	0.580907
4	171	0.567033
4	172	0.722161
4	175	0.590156
4	185	0.501282
4	188	0.519963
4	193	0.584478
4	195	0.619963
4	196	0.522299
4	197	0.633883
4	200	0.611218
4	201	0.603578
4	202	0.646795
4	207	0.66891
4	213	0.519597
4	230	0.566484
4	233	0.712042
4	239	0.533883
5	7	0.661035
5	10	0.519689
5	11	0.607463
5	19	0.531319
5	24	0.634524
5	27	0.607555
5	29	0.645833
5	36	0.681822
5	43	0.529258
5	58	0.611218
5	61	0.579533
5	70	0.657097
5	71	0.737866
5	75	0.629167
5	78	0.530861
5	80	0.62239
5	82	0.569139
5	83	0.632005
5	90	0.661447
5	103	0.530037
5	114	0.5913
5	121	0.535714
5	126	0.656822
5	128	0.538278
5	131	0.516621
5	134	0.607738
5	138	0.502106
5	141	0.522894
5	144	0.589469
5	147	0.591804
5	150	0.594734
5	154	0.513553
5	156	0.719963
5	157	0.6087
5	163	0.616804
5	165	0.563507
5	171	0.529487
5	172	0.589057
5	175	0.70783
5	181	0.528755
5	184	0.607051
5	200	0.503984
5	207	0.707326
5	215	0.546612
5	226	0.56543
5	235	0.531731
5	236	0.506599
5	237	0.620147
7	10	0.547024
7	19	0.596108
7	21	0.64533
7	24	0.699634
7	26	0.608013
7	27	0.564881
7	29	0.696337
7	36	0.710531
7	37	0.513095
7	42	0.516575
7	44	0.591117
7	58	0.617628
7	61	0.578755
7	70	0.605357
7	71	0.692857
7	74	0.604716
7	78	0.502885
7	80	0.673718
7	81	0.549405
7	82	0.543727
7	83	0.554899
7	90	0.605082
7	101	0.63402
7	103	0.598718
7	114	0.619826
7	121	0.575733
7	124	0.53956
7	126	0.646108
7	127	0.628846
7	128	0.505952
7	134	0.721749
7	141	0.501007
7	144	0.55609
7	147	0.681685
7	148	0.505723
7	149	0.521154
7	150	0.660806
7	151	0.504853
7	156	0.705769
7	157	0.579441
7	163	0.682692
7	165	0.53489
7	166	0.50119
7	171	0.506685
7	172	0.605952
7	175	0.686859
7	181	0.505723
7	184	0.591804
7	188	0.646612
7	193	0.55815
7	200	0.526877
7	207	0.691667
7	208	0.539423
7	215	0.507189
7	216	0.527793
7	226	0.646566
7	231	0.548077
7	235	0.674084
8	58	0.537408
8	153	0.54217
8	171	0.500275
8	226	0.584707
9	37	0.501099
9	70	0.509478
9	75	0.526786
10	18	0.565385
10	19	0.555357
10	21	0.613553
10	24	0.6125
10	27	0.575916
10	43	0.584478
10	58	0.549405
10	75	0.544414
10	80	0.567628
10	81	0.516438
10	83	0.5587
10	101	0.568452
10	105	0.571978
10	121	0.651557
10	128	0.521337
10	141	0.601236
10	144	0.517445
10	150	0.525641
10	156	0.612821
10	163	0.622161
10	165	0.532921
10	171	0.589744
10	172	0.696749
10	185	0.557967
10	188	0.503892
10	193	0.535394
10	195	0.500321
10	200	0.566896
10	207	0.548214
10	213	0.583974
10	226	0.501465
10	233	0.692674
10	239	0.555907
11	19	0.511951
11	21	0.519231
11	27	0.519734
11	29	0.589606
11	36	0.552564
11	61	0.522344
11	71	0.615659
11	75	0.508974
11	80	0.591667
11	90	0.618956
11	121	0.520147
11	134	0.628709
11	137	0.510302
11	147	0.532555
11	150	0.613736
11	151	0.512088
11	156	0.596612
11	159	0.53196
11	163	0.531822
11	172	0.506227
11	175	0.632005
11	177	0.545833
11	189	0.502701
11	197	0.538507
11	207	0.656914
11	215	0.54707
11	225	0.554625
11	226	0.509936
11	235	0.550092
11	236	0.565414
11	237	0.547756
13	15	0.663553
13	59	0.630357
13	85	0.58196
13	95	0.658471
13	96	0.561584
13	99	0.645726
13	108	0.564103
13	120	0.508654
13	155	0.589835
13	164	0.506548
13	168	0.582738
13	169	0.601832
13	180	0.718864
13	203	0.561126
13	205	0.557738
13	210	0.580952
13	212	0.594689
13	214	0.537179
13	221	0.517125
13	238	0.509799
14	25	0.506914
14	63	0.516255
14	113	0.577456
14	126	0.511859
14	172	0.554533
15	45	0.523306
15	46	0.646749
15	56	0.669093
15	59	0.787042
15	85	0.623168
15	95	0.624954
15	96	0.604029
15	99	0.727069
15	108	0.51076
15	120	0.635943
15	155	0.573581
15	168	0.677381
15	169	0.676603
15	180	0.7212
15	203	0.624863
15	205	0.72239
15	210	0.863965
15	212	0.595788
15	221	0.567995
15	238	0.576832
16	178	0.635852
16	182	0.554945
17	117	0.509936
18	19	0.630952
18	21	0.666346
18	23	0.518407
18	27	0.564148
18	28	0.547756
18	29	0.586676
18	35	0.676725
18	36	0.512363
18	41	0.546932
18	43	0.579716
18	48	0.708013
18	51	0.555037
18	60	0.554121
18	70	0.524359
18	71	0.536905
18	75	0.547115
18	78	0.511676
18	80	0.570604
18	81	0.646383
18	92	0.584661
18	101	0.501694
18	105	0.752564
18	113	0.602228
18	116	0.583471
18	121	0.733288
18	131	0.582555
18	138	0.635852
18	141	0.672711
18	144	0.502564
18	154	0.542079
18	156	0.521154
18	157	0.614057
18	161	0.528984
18	163	0.656227
18	165	0.533471
18	171	0.526511
18	172	0.695879
18	173	0.531914
18	175	0.545925
18	188	0.521429
18	193	0.518407
18	195	0.548672
18	200	0.655495
18	201	0.595016
18	202	0.602335
18	207	0.632005
18	213	0.549908
18	215	0.588919
18	233	0.735073
18	239	0.529167
19	21	0.694597
19	22	0.584112
19	24	0.5375
19	27	0.528205
19	29	0.588782
19	35	0.603578
19	36	0.533471
19	43	0.518452
19	44	0.554808
19	48	0.579487
19	61	0.525595
19	70	0.567857
19	75	0.563599
19	78	0.501236
19	80	0.620696
19	81	0.539194
19	91	0.569139
19	105	0.64565
19	121	0.560577
19	131	0.515293
19	134	0.558059
19	138	0.509936
19	141	0.548306
19	144	0.513324
19	150	0.507326
19	156	0.583059
19	158	0.629853
19	163	0.675595
19	172	0.615293
19	173	0.540888
19	175	0.557555
19	185	0.518681
19	188	0.639103
19	197	0.550595
19	200	0.626465
19	207	0.599176
19	215	0.539286
19	225	0.54098
19	233	0.640385
20	30	0.510302
20	46	0.510073
20	66	0.538004
20	93	0.509753
20	104	0.520879
20	120	0.527015
20	140	0.589515
20	229	0.505998
20	242	0.517308
21	29	0.622573
21	35	0.560446
21	36	0.588278
21	43	0.591392
21	44	0.542766
21	48	0.637592
21	58	0.509844
21	70	0.601328
21	71	0.598581
21	78	0.523947
21	80	0.633929
21	81	0.531822
21	91	0.560943
21	101	0.610943
21	105	0.685027
21	121	0.704029
21	126	0.506639
21	134	0.564744
21	138	0.553984
21	141	0.501648
21	144	0.515751
21	150	0.574267
21	156	0.597161
21	157	0.554029
21	163	0.69185
21	165	0.542353
21	172	0.607967
21	175	0.578892
21	185	0.542995
21	188	0.643636
21	193	0.588874
21	197	0.505403
21	200	0.600962
21	207	0.661813
21	213	0.549405
21	215	0.517582
21	216	0.538187
21	225	0.539377
21	230	0.505449
21	233	0.596841
21	239	0.552839
22	54	0.531273
22	57	0.555311
22	94	0.518773
22	104	0.547802
22	137	0.543132
22	140	0.519551
22	146	0.638553
22	159	0.615751
22	185	0.587179
22	189	0.583654
22	207	0.535668
22	225	0.782463
22	243	0.556181
23	24	0.540568
23	36	0.524267
23	42	0.529029
23	43	0.555907
23	48	0.503709
23	58	0.616071
23	71	0.525412
23	80	0.589789
23	81	0.510623
23	114	0.543132
23	118	0.551053
23	121	0.513233
23	173	0.525137
23	175	0.516163
23	188	0.558425
23	207	0.543315
23	215	0.503617
23	226	0.515751
24	27	0.698352
24	36	0.665751
24	42	0.539973
24	44	0.516667
24	58	0.7038
24	60	0.50261
24	61	0.592033
24	70	0.641896
24	71	0.513462
24	80	0.54707
24	81	0.552198
24	82	0.506685
24	90	0.529121
24	101	0.500595
24	114	0.558196
24	126	0.537592
24	128	0.536401
24	134	0.544048
24	141	0.543132
24	144	0.566438
24	147	0.529121
24	150	0.532326
24	154	0.505678
24	156	0.600504
24	157	0.598718
24	163	0.521108
24	165	0.53283
24	171	0.622115
24	172	0.514652
24	175	0.537042
24	188	0.596474
24	199	0.574588
24	200	0.51946
24	207	0.542445
24	209	0.56946
24	226	0.61772
24	237	0.542079
24	239	0.53489
26	29	0.54478
26	36	0.554121
26	42	0.579991
26	43	0.540018
26	48	0.512821
26	75	0.503709
26	78	0.512637
26	80	0.574771
26	81	0.551374
26	92	0.548031
26	114	0.580861
26	126	0.535714
26	134	0.633288
26	147	0.514423
26	148	0.534615
26	153	0.516896
26	163	0.660485
26	172	0.520559
26	175	0.514835
26	188	0.547756
26	215	0.526053
26	216	0.501236
26	226	0.554808
27	29	0.516758
27	36	0.627381
27	42	0.5413
27	43	0.503114
27	58	0.661676
27	70	0.517353
27	71	0.583929
27	75	0.571337
27	80	0.539057
27	82	0.516209
27	83	0.505128
27	91	0.515842
27	101	0.574222
27	103	0.523031
27	105	0.532189
27	114	0.58109
27	116	0.522115
27	121	0.560027
27	128	0.544048
27	134	0.567903
27	141	0.50261
27	144	0.666667
27	147	0.617674
27	148	0.561035
27	150	0.520559
27	154	0.560943
27	156	0.563599
27	157	0.661035
27	163	0.568498
27	165	0.599908
27	171	0.685027
27	172	0.638095
27	175	0.611676
27	188	0.605815
27	195	0.512408
27	207	0.615797
27	209	0.5587
27	215	0.619643
27	226	0.594048
27	237	0.586126
27	239	0.523214
28	35	0.535377
28	48	0.585119
28	58	0.503068
28	81	0.530998
28	105	0.552564
28	116	0.520421
28	121	0.531044
28	131	0.583791
28	141	0.504029
28	154	0.558883
28	163	0.541987
28	172	0.536264
28	201	0.54529
28	202	0.546474
29	36	0.556319
29	42	0.572802
29	48	0.529258
29	71	0.668544
29	74	0.501648
29	75	0.608242
29	80	0.601328
29	82	0.500687
29	90	0.5788
29	92	0.540247
29	105	0.50293
29	113	0.59758
29	121	0.670467
29	124	0.591209
29	126	0.684753
29	131	0.557418
29	134	0.671062
29	138	0.545513
29	141	0.539973
29	144	0.573443
29	147	0.596062
29	148	0.588095
29	149	0.544185
29	150	0.665339
29	151	0.593727
29	156	0.665751
29	163	0.727656
29	165	0.505082
29	172	0.705678
29	175	0.694872
29	177	0.528022
29	193	0.52152
29	200	0.607692
29	207	0.670879
29	213	0.520421
29	215	0.564927
29	225	0.565659
29	226	0.540797
29	230	0.533242
29	233	0.537775
29	235	0.630495
30	55	0.585302
30	64	0.555586
30	66	0.654808
30	89	0.505769
30	115	0.553114
30	142	0.566804
30	145	0.582967
30	146	0.592079
30	193	0.52152
30	204	0.582676
30	206	0.512179
32	117	0.537317
33	117	0.571245
33	211	0.632005
35	41	0.508225
35	43	0.531645
35	48	0.613446
35	51	0.556279
35	71	0.539406
35	78	0.512964
35	81	0.610653
35	92	0.623588
35	105	0.602892
35	110	0.589819
35	116	0.583844
35	121	0.517108
35	131	0.68879
35	138	0.592429
35	148	0.539841
35	163	0.565002
35	172	0.62226
35	178	0.533408
35	188	0.527204
35	197	0.584256
35	200	0.564979
35	201	0.614368
35	202	0.533706
35	207	0.563399
35	230	0.51088
35	233	0.544351
36	42	0.502839
36	43	0.567995
36	58	0.716117
36	61	0.553342
36	70	0.590888
36	71	0.703114
36	78	0.506227
36	80	0.625504
36	81	0.691392
36	82	0.523031
36	83	0.537408
36	90	0.586264
36	91	0.556181
36	92	0.588828
36	101	0.630861
36	103	0.560165
36	105	0.513095
36	110	0.642216
36	114	0.616712
36	116	0.5212
36	121	0.622436
36	126	0.659615
36	134	0.554258
36	141	0.503297
36	144	0.737454
36	147	0.582418
36	148	0.617949
36	150	0.506502
36	154	0.555769
36	156	0.65119
36	157	0.720513
36	163	0.630403
36	165	0.633288
36	171	0.638187
36	172	0.55293
36	175	0.704487
36	177	0.501694
36	181	0.658104
36	188	0.718407
36	193	0.51511
36	197	0.565797
36	200	0.546841
36	201	0.509988
36	207	0.728663
36	209	0.641712
36	213	0.538599
36	215	0.512408
36	226	0.643315
36	233	0.524267
36	236	0.517565
36	237	0.586081
36	239	0.568361
37	147	0.535348
37	150	0.529304
37	156	0.539469
37	207	0.538324
37	226	0.567445
38	46	0.664286
38	56	0.660943
38	77	0.538049
38	85	0.89533
38	95	0.831685
38	96	0.903297
38	97	0.78544
38	98	0.858288
38	99	0.584553
38	106	0.564927
38	120	0.541392
38	155	0.809982
38	168	0.750549
38	169	0.718864
38	203	0.893132
38	205	0.527427
38	210	0.58402
38	214	0.765751
38	221	0.676786
38	229	0.56717
38	238	0.528297
39	142	0.562363
40	147	0.541255
40	150	0.51337
40	179	0.526374
40	226	0.59478
41	202	0.711035
41	220	0.611126
41	233	0.569322
42	44	0.514515
42	71	0.577152
42	80	0.53054
42	91	0.534341
42	92	0.503709
42	114	0.51685
42	134	0.603846
42	147	0.574359
42	148	0.511264
42	150	0.54043
42	156	0.600824
42	163	0.665018
42	175	0.521291
42	188	0.568452
42	200	0.505311
42	207	0.534844
42	215	0.592582
42	226	0.633608
42	236	0.517199
43	48	0.538874
43	58	0.648489
43	71	0.580357
43	78	0.54739
43	80	0.57793
43	93	0.535211
43	101	0.513874
43	105	0.502289
43	121	0.536584
43	126	0.555403
43	140	0.517857
43	144	0.540201
43	150	0.57967
43	156	0.635211
43	157	0.658883
43	163	0.642674
43	165	0.503022
43	172	0.527656
43	175	0.515659
43	181	0.502152
43	184	0.523168
43	188	0.50119
43	201	0.536545
43	207	0.549908
43	213	0.54098
43	215	0.586951
43	225	0.521062
43	226	0.517537
43	233	0.517995
44	80	0.563095
44	81	0.515156
44	134	0.587042
44	150	0.507738
44	163	0.610714
45	56	0.528755
45	59	0.534295
45	108	0.55641
45	180	0.552885
45	205	0.600595
45	210	0.578755
45	221	0.592125
46	56	0.565568
46	59	0.61044
46	85	0.814377
46	95	0.717628
46	96	0.79533
46	97	0.70261
46	98	0.732463
46	99	0.716904
46	104	0.53402
46	120	0.68196
46	155	0.740797
46	168	0.734432
46	169	0.703526
46	180	0.501282
46	203	0.723764
46	205	0.533333
46	210	0.702106
46	214	0.622207
46	229	0.537134
48	60	0.551053
48	75	0.585531
48	80	0.6038
48	81	0.57326
48	91	0.561859
48	92	0.63956
48	101	0.556548
48	105	0.69391
48	113	0.502272
48	116	0.531273
48	121	0.569414
48	131	0.620513
48	134	0.529899
48	138	0.65554
48	141	0.607143
48	144	0.572619
48	157	0.503159
48	163	0.667262
48	172	0.572344
48	175	0.619643
48	188	0.525641
48	193	0.555037
48	195	0.603159
48	197	0.565842
48	200	0.611813
48	201	0.517794
48	202	0.523214
48	207	0.652106
48	213	0.504762
48	215	0.569139
48	216	0.576419
48	230	0.511676
48	233	0.687775
48	239	0.511172
50	58	0.564286
50	78	0.512958
50	110	0.522573
50	157	0.6
51	92	0.552106
51	105	0.500321
51	131	0.524634
51	163	0.527885
51	230	0.618361
51	233	0.535668
54	102	0.543727
54	185	0.524451
54	243	0.521841
55	64	0.735714
55	66	0.597848
55	142	0.623718
55	206	0.500321
55	223	0.535577
56	59	0.626603
56	85	0.641484
56	95	0.683929
56	96	0.639423
56	98	0.576099
56	99	0.623885
56	106	0.572161
56	108	0.519368
56	120	0.601374
56	155	0.624588
56	168	0.709844
56	169	0.672161
56	180	0.537225
56	203	0.731685
56	205	0.765385
56	210	0.693544
56	214	0.554396
56	221	0.795421
56	238	0.654533
57	104	0.53544
57	146	0.533196
57	173	0.532326
57	220	0.534844
57	225	0.580403
57	243	0.533562
58	66	0.554075
58	70	0.606731
58	71	0.575229
58	78	0.50261
58	80	0.545238
58	81	0.685165
58	101	0.561035
58	103	0.535256
58	110	0.549908
58	112	0.594741
58	114	0.649588
58	118	0.584341
58	121	0.527701
58	144	0.576099
58	148	0.566484
58	150	0.514927
58	154	0.569689
58	156	0.541026
58	157	0.750824
58	163	0.517033
58	165	0.530769
58	170	0.570147
58	171	0.583608
58	176	0.538599
58	181	0.530403
58	188	0.611951
58	201	0.513536
58	207	0.577198
58	209	0.654029
58	215	0.516392
58	226	0.656822
58	239	0.600641
59	85	0.567308
59	95	0.589423
59	96	0.570513
59	98	0.502289
59	99	0.715736
59	106	0.537912
59	120	0.556593
59	155	0.516621
59	168	0.611126
59	169	0.577106
59	180	0.638507
59	203	0.574863
59	205	0.64011
59	210	0.781868
59	212	0.576877
59	238	0.514606
60	78	0.517445
60	80	0.59185
60	81	0.551694
60	105	0.503434
60	113	0.584805
60	121	0.518864
60	141	0.559524
60	144	0.520192
60	157	0.56337
60	172	0.583059
60	175	0.500549
60	181	0.506548
60	200	0.558242
61	71	0.554212
61	80	0.521978
61	90	0.654029
61	101	0.53022
61	126	0.519505
61	128	0.542857
61	150	0.563553
61	156	0.692033
61	181	0.514332
61	207	0.508242
61	208	0.513233
61	226	0.524863
61	235	0.611538
61	236	0.603555
61	237	0.550092
62	222	0.59391
62	243	0.599451
64	66	0.57065
64	115	0.651648
64	142	0.769643
64	145	0.542353
64	146	0.543636
64	166	0.517353
64	183	0.592903
64	194	0.63544
64	206	0.50522
64	223	0.694505
64	232	0.598489
64	235	0.526923
65	146	0.633196
65	149	0.535531
65	194	0.549954
65	199	0.529533
65	225	0.504533
65	235	0.608242
65	242	0.587683
66	94	0.528251
66	114	0.519048
66	142	0.600962
66	145	0.508242
66	146	0.543223
66	204	0.516833
66	206	0.526419
66	223	0.512454
68	160	0.511676
68	164	0.74913
68	167	0.511218
68	222	0.841484
68	227	0.513736
68	234	0.521337
70	71	0.586493
70	90	0.516438
70	105	0.503755
70	114	0.54446
70	121	0.535027
70	126	0.517445
70	150	0.505266
70	154	0.597802
70	156	0.562592
70	157	0.515018
70	163	0.571703
70	165	0.57413
70	172	0.532921
70	175	0.51424
70	176	0.512683
70	207	0.518361
70	215	0.59533
71	75	0.52706
71	78	0.554396
71	80	0.642811
71	82	0.597619
71	90	0.643223
71	92	0.584936
71	100	0.613553
71	101	0.530678
71	103	0.51076
71	110	0.502289
71	113	0.518298
71	114	0.636264
71	121	0.593086
71	124	0.593819
71	126	0.644414
71	128	0.51424
71	131	0.506044
71	134	0.665568
71	138	0.552106
71	144	0.509844
71	147	0.629533
71	148	0.521154
71	149	0.517995
71	150	0.704396
71	151	0.573947
71	156	0.800549
71	157	0.623626
71	163	0.690888
71	165	0.50119
71	172	0.616667
71	175	0.699222
71	177	0.536584
71	179	0.515568
71	181	0.602976
71	184	0.614332
71	188	0.593819
71	193	0.569826
71	197	0.517353
71	207	0.780907
71	213	0.575824
71	215	0.620879
71	216	0.530998
71	226	0.597253
71	227	0.500778
71	230	0.577015
71	235	0.585943
71	236	0.571
71	237	0.538049
74	103	0.575641
74	112	0.500899
74	127	0.538782
74	146	0.505678
74	147	0.584249
74	148	0.581548
74	177	0.549451
74	190	0.616667
74	208	0.578022
74	226	0.566484
74	231	0.666621
74	235	0.524313
75	78	0.500824
75	82	0.530678
75	105	0.521795
75	116	0.511859
75	126	0.552885
75	131	0.550733
75	134	0.588004
75	138	0.609982
75	141	0.55902
75	156	0.578388
75	163	0.572482
75	165	0.545742
75	172	0.594689
75	175	0.606914
75	188	0.502381
75	195	0.598855
75	197	0.5337
75	200	0.548718
75	207	0.580952
75	213	0.51978
75	215	0.557143
75	216	0.550962
75	233	0.596245
77	97	0.654716
77	98	0.584615
77	106	0.628984
78	80	0.583562
78	81	0.586401
78	121	0.520147
78	157	0.584249
78	163	0.569277
78	172	0.500458
78	207	0.518132
80	81	0.512683
80	83	0.518864
80	90	0.515614
80	92	0.500458
80	101	0.63196
80	105	0.546154
80	113	0.509461
80	121	0.634982
80	126	0.559478
80	134	0.67935
80	144	0.553114
80	147	0.501511
80	150	0.68402
80	156	0.644963
80	157	0.544689
80	161	0.510394
80	163	0.629396
80	172	0.654304
80	175	0.630907
80	177	0.54565
80	181	0.585394
80	184	0.509524
80	185	0.528114
80	188	0.653663
80	193	0.511905
80	200	0.530586
80	207	0.707967
80	213	0.647802
80	216	0.508288
80	226	0.520513
80	227	0.529075
80	230	0.535211
80	239	0.522115
81	92	0.587637
81	101	0.506822
81	105	0.63869
81	110	0.666438
81	113	0.52583
81	116	0.581136
81	121	0.680723
81	123	0.539103
81	141	0.564881
81	144	0.539652
81	148	0.608837
81	154	0.57033
81	157	0.687134
81	163	0.616209
81	165	0.545742
81	171	0.553938
81	172	0.63283
81	175	0.512592
81	176	0.532967
81	188	0.536722
81	193	0.503159
81	197	0.505357
81	200	0.542628
81	201	0.569214
81	202	0.538004
81	207	0.521108
81	209	0.510577
81	226	0.506273
81	233	0.614515
81	239	0.551465
82	90	0.500504
82	100	0.571886
82	138	0.529121
82	156	0.59391
82	163	0.603434
82	165	0.535806
82	171	0.580861
82	175	0.560943
82	207	0.54185
83	103	0.518727
83	114	0.524863
83	121	0.523947
83	126	0.553114
83	144	0.546016
83	147	0.561676
83	156	0.525916
83	157	0.610531
83	163	0.501236
83	172	0.522436
83	175	0.604029
83	200	0.524267
83	208	0.507189
83	226	0.584661
85	95	0.875229
85	96	0.978846
85	97	0.785623
85	98	0.797802
85	99	0.676427
85	120	0.652747
85	155	0.899267
85	168	0.880678
85	169	0.85728
85	180	0.505449
85	199	0.532967
85	203	0.953892
85	205	0.605037
85	210	0.695284
85	212	0.522436
85	214	0.811722
85	221	0.695513
85	229	0.536951
85	238	0.57793
89	146	0.532784
89	189	0.549267
90	103	0.624038
90	126	0.656044
90	127	0.576648
90	128	0.528663
90	134	0.558608
90	144	0.538599
90	147	0.606456
90	150	0.625229
90	151	0.510623
90	156	0.735852
90	163	0.53228
90	166	0.503388
90	172	0.542445
90	175	0.639332
90	177	0.526007
90	179	0.582647
90	181	0.595879
90	184	0.543636
90	207	0.580678
90	208	0.575458
90	213	0.558471
90	215	0.527885
90	226	0.58315
90	231	0.510211
90	235	0.636767
90	236	0.615254
90	237	0.606273
91	134	0.530266
91	144	0.512821
91	154	0.536218
91	163	0.530403
91	188	0.528114
91	227	0.506502
92	105	0.576648
92	110	0.572253
92	113	0.537644
92	116	0.565476
92	121	0.524222
92	126	0.517445
92	131	0.512088
92	138	0.552289
92	148	0.540018
92	157	0.599359
92	163	0.68631
92	172	0.572344
92	175	0.578022
92	193	0.515476
92	197	0.587363
92	201	0.508431
92	207	0.642582
92	230	0.610256
94	97	0.574817
94	101	0.514286
94	128	0.612134
94	134	0.506777
94	147	0.537454
94	149	0.501099
94	150	0.57413
94	185	0.720009
94	194	0.615522
94	225	0.521795
94	227	0.541667
94	235	0.666758
95	96	0.886401
95	97	0.617674
95	98	0.696566
95	99	0.681372
95	106	0.557921
95	120	0.607189
95	155	0.858104
95	168	0.783974
95	169	0.723123
95	180	0.566804
95	203	0.883883
95	205	0.639744
95	210	0.638828
95	212	0.553984
95	214	0.742399
95	221	0.664744
95	238	0.569597
96	97	0.804579
96	98	0.813874
96	99	0.683547
96	111	0.504121
96	120	0.624908
96	155	0.878114
96	168	0.865156
96	169	0.836218
96	199	0.503068
96	203	0.963233
96	205	0.609432
96	210	0.680952
96	212	0.513782
96	214	0.798855
96	221	0.657555
96	229	0.544368
96	238	0.586676
97	98	0.798168
97	104	0.525962
97	111	0.521108
97	155	0.64359
97	168	0.630998
97	169	0.619872
97	194	0.62619
97	199	0.538324
97	203	0.737592
97	214	0.590705
97	227	0.526648
97	229	0.534203
97	238	0.518544
98	99	0.567703
98	120	0.568132
98	155	0.692445
98	168	0.627885
98	169	0.644689
98	194	0.554029
98	203	0.761035
98	210	0.54272
98	214	0.626419
98	221	0.560897
98	229	0.562592
99	120	0.591422
99	155	0.550212
99	168	0.673474
99	169	0.636912
99	180	0.616674
99	203	0.668002
99	205	0.661271
99	210	0.765668
99	214	0.594123
99	221	0.541215
99	238	0.614018
100	113	0.502455
100	131	0.514927
100	156	0.51598
100	230	0.546337
101	105	0.508104
101	116	0.51859
101	121	0.671062
101	128	0.516758
101	134	0.503938
101	141	0.523397
101	144	0.514744
101	149	0.581227
101	156	0.599542
101	157	0.645833
101	163	0.583837
101	165	0.518956
101	172	0.613233
101	175	0.595147
101	184	0.500916
101	185	0.703846
101	188	0.613049
101	193	0.588645
101	195	0.541392
101	207	0.750412
101	213	0.529304
101	226	0.534386
101	227	0.569002
101	233	0.585119
101	237	0.515201
102	125	0.567308
102	243	0.552793
103	112	0.521686
103	114	0.545559
103	126	0.569048
103	147	0.675275
103	150	0.564057
103	151	0.582463
103	156	0.542857
103	157	0.56456
103	166	0.512179
103	175	0.61076
103	181	0.587363
103	190	0.569826
103	208	0.556319
103	226	0.67207
103	231	0.644505
103	235	0.561218
103	236	0.535858
103	237	0.578755
104	146	0.616575
104	169	0.504304
104	173	0.554899
104	199	0.624222
104	206	0.5087
104	242	0.538095
105	116	0.637363
105	121	0.650046
105	137	0.505952
105	138	0.622985
105	141	0.52381
105	154	0.519597
105	157	0.527289
105	158	0.501374
105	163	0.654441
105	165	0.575824
105	171	0.550641
105	172	0.641575
105	188	0.559615
105	195	0.587866
105	197	0.516804
105	200	0.566712
105	201	0.58943
105	202	0.586722
105	207	0.547848
105	215	0.570421
105	230	0.507921
105	233	0.698581
105	239	0.565385
106	120	0.511859
106	203	0.501603
106	210	0.519002
108	120	0.559432
108	168	0.517445
108	180	0.617857
108	203	0.525092
108	205	0.569551
108	221	0.686447
109	118	0.508745
109	148	0.517674
110	126	0.501145
110	144	0.516117
110	148	0.505952
110	157	0.675412
110	181	0.500504
110	188	0.507601
110	197	0.541575
110	207	0.517766
111	168	0.51044
111	203	0.525412
112	157	0.518916
112	226	0.555295
113	121	0.669765
113	126	0.607676
113	131	0.611065
113	134	0.515413
113	137	0.52583
113	141	0.542085
113	163	0.522762
113	171	0.572488
113	172	0.746277
113	175	0.589979
113	184	0.512643
113	193	0.5479
113	200	0.659715
113	201	0.526019
113	207	0.562232
113	213	0.567543
113	233	0.574572
114	124	0.501786
114	134	0.59391
114	147	0.567399
114	148	0.527106
114	154	0.547161
114	156	0.504212
114	157	0.569139
114	163	0.521612
114	170	0.547024
114	175	0.548123
114	181	0.535806
114	188	0.640659
114	207	0.511767
114	209	0.542811
114	215	0.572482
114	226	0.69011
114	231	0.544048
115	117	0.534936
115	142	0.594185
115	146	0.538141
115	206	0.557189
116	121	0.543681
116	141	0.525733
116	148	0.501832
116	157	0.606777
116	165	0.55
116	171	0.568223
116	172	0.603892
116	188	0.572527
116	195	0.572619
116	200	0.648764
116	201	0.557447
116	233	0.515064
116	239	0.539698
117	211	0.54043
118	188	0.543544
120	155	0.617766
120	168	0.658425
120	169	0.570742
120	203	0.63489
120	205	0.694002
120	210	0.63631
120	214	0.608425
120	221	0.616484
121	126	0.609661
121	131	0.549222
121	134	0.503068
121	138	0.505632
121	141	0.718544
121	144	0.51044
121	150	0.500549
121	156	0.602747
121	157	0.649038
121	163	0.694368
121	165	0.619734
121	171	0.584249
121	172	0.814881
121	173	0.502839
121	175	0.683745
121	176	0.571291
121	185	0.602839
121	188	0.541163
121	193	0.636218
121	200	0.631777
121	201	0.563399
121	202	0.503938
121	207	0.668636
121	213	0.579808
121	230	0.567766
121	233	0.659615
121	239	0.533333
122	207	0.583157
122	230	0.521892
123	201	0.540368
124	134	0.510302
124	148	0.508516
124	175	0.573626
124	207	0.514698
124	215	0.519689
124	226	0.511493
125	243	0.531273
126	129	0.504304
126	131	0.516712
126	134	0.552152
126	141	0.550183
126	144	0.610394
126	147	0.601236
126	150	0.610623
126	151	0.5
126	156	0.640201
126	157	0.634524
126	163	0.614057
126	165	0.519826
126	172	0.609158
126	175	0.725137
126	176	0.50989
126	184	0.567949
126	193	0.623718
126	200	0.572299
126	207	0.623123
126	208	0.528617
126	213	0.581136
126	215	0.522436
126	226	0.614377
126	235	0.613919
126	236	0.544489
126	237	0.569002
127	128	0.569734
127	147	0.52065
127	156	0.555952
127	179	0.573443
127	190	0.602244
127	208	0.62207
127	235	0.515339
127	236	0.504905
128	147	0.600275
128	150	0.543544
128	156	0.612454
128	157	0.529625
128	172	0.516392
128	179	0.507097
128	190	0.573443
128	207	0.522253
128	208	0.580952
128	215	0.505769
128	226	0.618086
128	235	0.596841
128	237	0.50641
129	175	0.52152
131	138	0.576786
131	141	0.512317
131	144	0.513553
131	156	0.502106
131	163	0.594093
131	172	0.671337
131	175	0.539835
131	193	0.515797
131	197	0.550275
131	200	0.565614
131	207	0.530723
131	215	0.503663
131	230	0.54739
131	233	0.566163
134	137	0.577656
134	144	0.520513
134	146	0.526282
134	147	0.629304
134	148	0.536172
134	149	0.525275
134	150	0.670375
134	151	0.579716
134	156	0.540797
134	159	0.560668
134	163	0.595513
134	172	0.52033
134	175	0.657875
134	177	0.580586
134	184	0.507921
134	188	0.613095
134	189	0.557051
134	207	0.681639
134	213	0.517995
134	215	0.561905
134	216	0.639286
134	226	0.635027
134	227	0.574634
134	235	0.69359
137	148	0.582189
137	207	0.544689
138	161	0.506319
138	163	0.595559
138	165	0.517995
138	172	0.52207
138	175	0.511813
138	197	0.532143
138	207	0.606685
138	215	0.551969
138	216	0.570055
138	233	0.535348
140	159	0.537866
140	225	0.55435
140	242	0.536355
141	156	0.574313
141	157	0.537271
141	163	0.642995
141	165	0.64043
141	171	0.586035
141	172	0.669002
141	175	0.615751
141	195	0.526694
141	200	0.629075
141	233	0.666346
142	145	0.504212
142	146	0.535989
142	183	0.509249
142	194	0.591117
142	206	0.56772
142	223	0.640064
142	232	0.568178
143	225	0.508288
144	147	0.564423
144	148	0.560348
144	156	0.544689
144	157	0.585119
144	163	0.539057
144	165	0.530357
144	171	0.532005
144	172	0.559203
144	175	0.651236
144	177	0.503571
144	188	0.592949
144	195	0.503068
144	200	0.55609
144	207	0.646429
144	209	0.570788
144	213	0.539332
144	215	0.514148
144	226	0.576328
144	233	0.588049
144	237	0.556914
144	239	0.501328
145	193	0.533562
146	149	0.565888
146	159	0.565339
146	173	0.525962
146	185	0.554396
146	189	0.682326
146	190	0.505082
146	194	0.559295
146	223	0.510714
146	225	0.630861
146	235	0.626282
146	241	0.512042
146	242	0.552244
146	243	0.544643
147	148	0.58544
147	150	0.646383
147	151	0.538004
147	156	0.673168
147	157	0.54533
147	163	0.514103
147	175	0.633196
147	179	0.591941
147	188	0.509707
147	190	0.548214
147	207	0.620375
147	208	0.65641
147	226	0.697894
147	231	0.624588
147	235	0.647985
147	236	0.523793
147	237	0.577793
148	157	0.560806
148	175	0.506364
148	176	0.501145
148	177	0.555678
148	188	0.557647
148	200	0.505266
148	207	0.50728
148	215	0.502015
148	226	0.547665
148	231	0.524542
149	150	0.557784
149	163	0.506227
149	166	0.659249
149	175	0.552518
149	185	0.622756
149	194	0.621291
149	207	0.544139
149	225	0.545788
149	227	0.573352
149	235	0.772436
149	237	0.511172
149	242	0.60902
150	151	0.610806
150	156	0.711538
150	163	0.638965
150	166	0.607463
150	172	0.529029
150	175	0.618361
150	179	0.520375
150	184	0.613828
150	185	0.513828
150	188	0.532647
150	189	0.603114
150	191	0.53315
150	193	0.508242
150	207	0.632875
150	208	0.509112
150	213	0.578114
150	215	0.553342
150	225	0.535897
150	226	0.674313
150	230	0.584203
150	235	0.70348
150	236	0.554127
151	177	0.561584
151	208	0.55206
151	235	0.615018
151	236	0.526357
154	157	0.570788
154	188	0.514652
155	168	0.832189
155	169	0.745696
155	180	0.577473
155	203	0.873489
155	205	0.513416
155	210	0.573077
155	212	0.550137
155	214	0.754441
155	221	0.646154
155	238	0.54739
156	157	0.592995
156	163	0.720055
156	165	0.52207
156	172	0.650687
156	175	0.697985
156	177	0.501969
156	179	0.586951
156	181	0.6087
156	184	0.634799
156	185	0.546474
156	188	0.542949
156	193	0.561767
156	200	0.597848
156	207	0.762821
156	213	0.628159
156	215	0.61424
156	226	0.636584
156	230	0.556364
156	235	0.594368
156	236	0.565025
156	237	0.584982
157	163	0.570925
157	165	0.5875
157	170	0.503297
157	171	0.590614
157	172	0.586355
157	175	0.618727
157	176	0.602198
157	181	0.564423
157	188	0.59217
157	200	0.607967
157	201	0.532584
157	207	0.638004
157	209	0.539973
157	213	0.565522
157	215	0.550962
157	226	0.717766
157	237	0.582143
157	239	0.580357
159	162	0.56511
159	189	0.596383
159	225	0.74098
160	164	0.504899
161	200	0.592216
161	207	0.506364
162	193	0.535623
162	207	0.517353
162	225	0.53869
163	165	0.544414
163	171	0.530952
163	172	0.736996
163	175	0.725412
163	184	0.580403
163	185	0.531044
163	188	0.560256
163	193	0.593178
163	197	0.568132
163	200	0.601557
163	201	0.549342
163	207	0.721154
163	213	0.545284
163	215	0.628205
163	216	0.508654
163	226	0.589103
163	230	0.687821
163	233	0.660256
164	180	0.539515
164	212	0.512637
164	220	0.552015
164	222	0.660394
165	171	0.706685
165	172	0.577793
165	175	0.535531
165	195	0.602885
165	197	0.565293
165	215	0.509844
165	233	0.542766
165	239	0.504625
166	191	0.589103
166	194	0.601832
166	208	0.558425
166	226	0.600137
166	231	0.55467
166	235	0.726099
166	236	0.50067
167	212	0.504716
167	220	0.510714
168	169	0.874817
168	180	0.582875
168	203	0.893223
168	205	0.684615
168	210	0.690934
168	214	0.739744
168	221	0.755586
168	238	0.618223
169	180	0.555449
169	192	0.576786
169	199	0.532692
169	203	0.848535
169	205	0.675549
169	210	0.692079
169	212	0.538004
169	214	0.69446
169	221	0.7087
169	238	0.630174
170	226	0.573855
171	172	0.552518
171	175	0.568864
171	181	0.519185
171	188	0.500733
171	200	0.588095
171	226	0.564057
172	175	0.688599
172	184	0.514057
172	185	0.620788
172	193	0.5837
172	195	0.526832
172	200	0.690522
172	201	0.551288
172	207	0.655128
172	213	0.617582
172	225	0.501511
172	230	0.554487
172	233	0.675733
173	242	0.557051
174	177	0.567949
174	226	0.50348
175	177	0.602518
175	179	0.503984
175	181	0.575137
175	184	0.617949
175	188	0.544414
175	193	0.560348
175	197	0.502564
175	200	0.554075
175	207	0.766255
175	208	0.523168
175	213	0.580632
175	215	0.603709
175	216	0.572527
175	226	0.659524
175	231	0.517445
175	233	0.509341
175	235	0.625916
175	236	0.506393
175	237	0.66859
176	213	0.527885
176	226	0.54359
177	208	0.55348
177	231	0.580678
177	235	0.534158
178	220	0.537592
179	207	0.519277
180	205	0.515659
180	210	0.660668
180	212	0.761722
180	221	0.637225
180	238	0.502427
181	188	0.533516
181	207	0.528159
181	209	0.507738
181	226	0.591209
181	237	0.501786
183	223	0.514881
183	231	0.533242
184	193	0.577427
184	207	0.633059
184	213	0.52294
184	235	0.503434
185	193	0.533562
185	194	0.522161
185	207	0.588599
185	225	0.583929
185	227	0.571337
185	235	0.559936
185	242	0.517537
188	200	0.507234
[truncated: 85 more rows]

## Sheet: Location0.6
1	36	0.656548
1	58	0.638416
1	126	0.662821
1	157	0.635394
1	226	0.608471
4	18	0.745467
4	21	0.656685
4	28	0.618498
4	35	0.624824
4	36	0.608791
4	48	0.683974
4	81	0.62381
4	105	0.661538
4	113	0.662393
4	121	0.698718
4	131	0.619643
4	141	0.628617
4	163	0.630174
4	172	0.722161
4	195	0.619963
4	197	0.633883
4	200	0.611218
4	201	0.603578
4	202	0.646795
4	207	0.66891
4	233	0.712042
5	7	0.661035
5	11	0.607463
5	24	0.634524
5	27	0.607555
5	29	0.645833
5	36	0.681822
5	58	0.611218
5	70	0.657097
5	71	0.737866
5	75	0.629167
5	80	0.62239
5	83	0.632005
5	90	0.661447
5	126	0.656822
5	134	0.607738
5	156	0.719963
5	157	0.6087
5	163	0.616804
5	175	0.70783
5	184	0.607051
5	207	0.707326
5	237	0.620147
7	21	0.64533
7	24	0.699634
7	26	0.608013
7	29	0.696337
7	36	0.710531
7	58	0.617628
7	70	0.605357
7	71	0.692857
7	74	0.604716
7	80	0.673718
7	90	0.605082
7	101	0.63402
7	114	0.619826
7	126	0.646108
7	127	0.628846
7	134	0.721749
7	147	0.681685
7	150	0.660806
7	156	0.705769
7	163	0.682692
7	172	0.605952
7	175	0.686859
7	188	0.646612
7	207	0.691667
7	226	0.646566
7	235	0.674084
10	21	0.613553
10	24	0.6125
10	121	0.651557
10	141	0.601236
10	156	0.612821
10	163	0.622161
10	172	0.696749
10	233	0.692674
11	71	0.615659
11	90	0.618956
11	134	0.628709
11	150	0.613736
11	175	0.632005
11	207	0.656914
13	15	0.663553
13	59	0.630357
13	95	0.658471
13	99	0.645726
13	169	0.601832
13	180	0.718864
15	46	0.646749
15	56	0.669093
15	59	0.787042
15	85	0.623168
15	95	0.624954
15	96	0.604029
15	99	0.727069
15	120	0.635943
15	168	0.677381
15	169	0.676603
15	180	0.7212
15	203	0.624863
15	205	0.72239
15	210	0.863965
16	178	0.635852
18	19	0.630952
18	21	0.666346
18	35	0.676725
18	48	0.708013
18	81	0.646383
18	105	0.752564
18	113	0.602228
18	121	0.733288
18	138	0.635852
18	141	0.672711
18	157	0.614057
18	163	0.656227
18	172	0.695879
18	200	0.655495
18	202	0.602335
18	207	0.632005
18	233	0.735073
19	21	0.694597
19	35	0.603578
19	80	0.620696
19	105	0.64565
19	158	0.629853
19	163	0.675595
19	172	0.615293
19	188	0.639103
19	200	0.626465
19	233	0.640385
21	29	0.622573
21	48	0.637592
21	70	0.601328
21	80	0.633929
21	101	0.610943
21	105	0.685027
21	121	0.704029
21	163	0.69185
21	172	0.607967
21	188	0.643636
21	200	0.600962
21	207	0.661813
22	146	0.638553
22	159	0.615751
22	225	0.782463
23	58	0.616071
24	27	0.698352
24	36	0.665751
24	58	0.7038
24	70	0.641896
24	156	0.600504
24	171	0.622115
24	226	0.61772
26	134	0.633288
26	163	0.660485
27	36	0.627381
27	58	0.661676
27	144	0.666667
27	147	0.617674
27	157	0.661035
27	171	0.685027
27	172	0.638095
27	175	0.611676
27	188	0.605815
27	207	0.615797
27	215	0.619643
29	71	0.668544
29	75	0.608242
29	80	0.601328
29	121	0.670467
29	126	0.684753
29	134	0.671062
29	150	0.665339
29	156	0.665751
29	163	0.727656
29	172	0.705678
29	175	0.694872
29	200	0.607692
29	207	0.670879
29	235	0.630495
30	66	0.654808
33	211	0.632005
35	48	0.613446
35	81	0.610653
35	92	0.623588
35	105	0.602892
35	131	0.68879
35	172	0.62226
35	201	0.614368
36	58	0.716117
36	71	0.703114
36	80	0.625504
36	81	0.691392
36	101	0.630861
36	110	0.642216
36	114	0.616712
36	121	0.622436
36	126	0.659615
36	144	0.737454
36	148	0.617949
36	156	0.65119
36	157	0.720513
36	163	0.630403
36	165	0.633288
36	171	0.638187
36	175	0.704487
36	181	0.658104
36	188	0.718407
36	207	0.728663
36	209	0.641712
36	226	0.643315
38	46	0.664286
38	56	0.660943
38	85	0.89533
38	95	0.831685
38	96	0.903297
38	97	0.78544
38	98	0.858288
38	155	0.809982
38	168	0.750549
38	169	0.718864
38	203	0.893132
38	214	0.765751
38	221	0.676786
41	202	0.711035
41	220	0.611126
42	134	0.603846
42	156	0.600824
42	163	0.665018
42	226	0.633608
43	58	0.648489
43	156	0.635211
43	157	0.658883
43	163	0.642674
44	163	0.610714
45	205	0.600595
46	59	0.61044
46	85	0.814377
46	95	0.717628
46	96	0.79533
46	97	0.70261
46	98	0.732463
46	99	0.716904
46	120	0.68196
46	155	0.740797
46	168	0.734432
46	169	0.703526
46	203	0.723764
46	210	0.702106
46	214	0.622207
48	80	0.6038
48	92	0.63956
48	105	0.69391
48	131	0.620513
48	138	0.65554
48	141	0.607143
48	163	0.667262
48	175	0.619643
48	195	0.603159
48	200	0.611813
48	207	0.652106
48	233	0.687775
50	157	0.6
51	230	0.618361
55	64	0.735714
55	142	0.623718
56	59	0.626603
56	85	0.641484
56	95	0.683929
56	96	0.639423
56	99	0.623885
56	120	0.601374
56	155	0.624588
56	168	0.709844
56	169	0.672161
56	203	0.731685
56	205	0.765385
56	210	0.693544
56	221	0.795421
56	238	0.654533
58	70	0.606731
58	81	0.685165
58	114	0.649588
58	157	0.750824
58	188	0.611951
58	209	0.654029
58	226	0.656822
58	239	0.600641
59	99	0.715736
59	168	0.611126
59	180	0.638507
59	205	0.64011
59	210	0.781868
61	90	0.654029
61	156	0.692033
61	235	0.611538
61	236	0.603555
64	115	0.651648
64	142	0.769643
64	194	0.63544
64	223	0.694505
65	146	0.633196
65	235	0.608242
66	142	0.600962
68	164	0.74913
68	222	0.841484
71	80	0.642811
71	90	0.643223
71	100	0.613553
71	114	0.636264
71	126	0.644414
71	134	0.665568
71	147	0.629533
71	150	0.704396
71	156	0.800549
71	157	0.623626
71	163	0.690888
71	172	0.616667
71	175	0.699222
71	181	0.602976
71	184	0.614332
71	207	0.780907
71	215	0.620879
74	190	0.616667
74	231	0.666621
75	138	0.609982
75	175	0.606914
77	97	0.654716
77	106	0.628984
80	101	0.63196
80	121	0.634982
80	134	0.67935
80	150	0.68402
80	156	0.644963
80	163	0.629396
80	172	0.654304
80	175	0.630907
80	188	0.653663
80	207	0.707967
80	213	0.647802
81	105	0.63869
81	110	0.666438
81	121	0.680723
81	148	0.608837
81	157	0.687134
81	163	0.616209
81	172	0.63283
81	233	0.614515
82	163	0.603434
83	157	0.610531
83	175	0.604029
85	95	0.875229
85	96	0.978846
85	97	0.785623
85	98	0.797802
85	99	0.676427
85	120	0.652747
85	155	0.899267
85	168	0.880678
85	169	0.85728
85	203	0.953892
85	205	0.605037
85	210	0.695284
85	214	0.811722
85	221	0.695513
90	103	0.624038
90	126	0.656044
90	147	0.606456
90	150	0.625229
90	156	0.735852
90	175	0.639332
90	235	0.636767
90	236	0.615254
90	237	0.606273
92	163	0.68631
92	207	0.642582
92	230	0.610256
94	128	0.612134
94	185	0.720009
94	194	0.615522
94	235	0.666758
95	96	0.886401
95	97	0.617674
95	98	0.696566
95	99	0.681372
95	120	0.607189
95	155	0.858104
95	168	0.783974
95	169	0.723123
95	203	0.883883
95	205	0.639744
95	210	0.638828
95	214	0.742399
95	221	0.664744
96	97	0.804579
96	98	0.813874
96	99	0.683547
96	120	0.624908
96	155	0.878114
96	168	0.865156
96	169	0.836218
96	203	0.963233
96	205	0.609432
96	210	0.680952
96	214	0.798855
96	221	0.657555
97	98	0.798168
97	155	0.64359
97	168	0.630998
97	169	0.619872
97	194	0.62619
97	203	0.737592
98	155	0.692445
98	168	0.627885
98	169	0.644689
98	203	0.761035
98	214	0.626419
99	168	0.673474
99	169	0.636912
99	180	0.616674
99	203	0.668002
99	205	0.661271
99	210	0.765668
99	238	0.614018
101	121	0.671062
101	157	0.645833
101	172	0.613233
101	185	0.703846
101	188	0.613049
101	207	0.750412
103	147	0.675275
103	175	0.61076
103	226	0.67207
103	231	0.644505
104	146	0.616575
104	199	0.624222
105	116	0.637363
105	121	0.650046
105	138	0.622985
105	163	0.654441
105	172	0.641575
105	233	0.698581
108	180	0.617857
108	221	0.686447
110	157	0.675412
113	121	0.669765
113	126	0.607676
113	131	0.611065
113	172	0.746277
113	200	0.659715
114	188	0.640659
114	226	0.69011
116	157	0.606777
116	172	0.603892
116	200	0.648764
120	155	0.617766
120	168	0.658425
120	203	0.63489
120	205	0.694002
120	210	0.63631
120	214	0.608425
120	221	0.616484
121	126	0.609661
121	141	0.718544
121	156	0.602747
121	157	0.649038
121	163	0.694368
121	165	0.619734
121	172	0.814881
121	175	0.683745
121	185	0.602839
121	193	0.636218
121	200	0.631777
121	207	0.668636
121	233	0.659615
126	144	0.610394
126	147	0.601236
126	150	0.610623
126	156	0.640201
126	157	0.634524
126	163	0.614057
126	172	0.609158
126	175	0.725137
126	193	0.623718
126	207	0.623123
126	226	0.614377
126	235	0.613919
127	190	0.602244
127	208	0.62207
128	147	0.600275
128	156	0.612454
128	226	0.618086
131	172	0.671337
134	147	0.629304
134	150	0.670375
134	175	0.657875
134	188	0.613095
134	207	0.681639
134	216	0.639286
134	226	0.635027
134	235	0.69359
138	207	0.606685
141	163	0.642995
141	165	0.64043
141	172	0.669002
141	175	0.615751
141	200	0.629075
141	233	0.666346
142	223	0.640064
144	175	0.651236
144	207	0.646429
146	189	0.682326
146	225	0.630861
146	235	0.626282
147	150	0.646383
147	156	0.673168
147	175	0.633196
147	207	0.620375
147	208	0.65641
147	226	0.697894
147	231	0.624588
147	235	0.647985
149	166	0.659249
149	185	0.622756
149	194	0.621291
149	235	0.772436
149	242	0.60902
150	151	0.610806
150	156	0.711538
150	163	0.638965
150	166	0.607463
150	175	0.618361
150	184	0.613828
150	189	0.603114
150	207	0.632875
150	226	0.674313
150	235	0.70348
151	235	0.615018
155	168	0.832189
155	169	0.745696
155	203	0.873489
155	214	0.754441
155	221	0.646154
156	163	0.720055
156	172	0.650687
156	175	0.697985
156	181	0.6087
156	184	0.634799
156	207	0.762821
156	213	0.628159
156	215	0.61424
156	226	0.636584
157	175	0.618727
157	176	0.602198
157	200	0.607967
157	207	0.638004
157	226	0.717766
159	225	0.74098
163	172	0.736996
163	175	0.725412
163	200	0.601557
163	207	0.721154
163	215	0.628205
163	230	0.687821
163	233	0.660256
164	222	0.660394
165	171	0.706685
165	195	0.602885
166	194	0.601832
166	226	0.600137
166	235	0.726099
168	169	0.874817
168	203	0.893223
168	205	0.684615
168	210	0.690934
168	214	0.739744
168	221	0.755586
168	238	0.618223
169	203	0.848535
169	205	0.675549
169	210	0.692079
169	214	0.69446
169	221	0.7087
169	238	0.630174
172	175	0.688599
172	185	0.620788
172	200	0.690522
172	207	0.655128
172	213	0.617582
172	233	0.675733
175	177	0.602518
175	184	0.617949
175	207	0.766255
175	215	0.603709
175	226	0.659524
175	235	0.625916
175	237	0.66859
180	210	0.660668
180	212	0.761722
180	221	0.637225
184	207	0.633059
188	207	0.675321
188	226	0.627244
189	235	0.6337
190	231	0.619597
191	236	0.602914
193	207	0.781639
193	213	0.609295
193	227	0.601374
194	235	0.709249
194	242	0.610623
195	233	0.640705
197	207	0.618178
197	233	0.659386
200	233	0.651282
203	205	0.67294
203	210	0.678526
203	214	0.755769
203	221	0.733883
203	238	0.656319
205	210	0.73141
205	221	0.712179
207	213	0.640156
207	215	0.616621
207	226	0.617353
207	227	0.635485
207	230	0.608837
208	235	0.623855
208	236	0.612003
210	221	0.624634
210	238	0.60435
214	221	0.674908
222	234	0.662866
225	242	0.601465
226	231	0.675778
226	235	0.632189
226	237	0.652289
231	237	0.609295

## Sheet: Location0.7
4	18	0.745467
4	172	0.722161
4	233	0.712042
5	71	0.737866
5	156	0.719963
5	175	0.70783
5	207	0.707326
7	36	0.710531
7	134	0.721749
7	156	0.705769
13	180	0.718864
15	59	0.787042
15	99	0.727069
15	180	0.7212
15	205	0.72239
15	210	0.863965
18	48	0.708013
18	105	0.752564
18	121	0.733288
18	233	0.735073
21	121	0.704029
22	225	0.782463
24	58	0.7038
29	163	0.727656
29	172	0.705678
36	58	0.716117
36	71	0.703114
36	144	0.737454
36	157	0.720513
36	175	0.704487
36	188	0.718407
36	207	0.728663
38	85	0.89533
38	95	0.831685
38	96	0.903297
38	97	0.78544
38	98	0.858288
38	155	0.809982
38	168	0.750549
38	169	0.718864
38	203	0.893132
38	214	0.765751
41	202	0.711035
46	85	0.814377
46	95	0.717628
46	96	0.79533
46	97	0.70261
46	98	0.732463
46	99	0.716904
46	155	0.740797
46	168	0.734432
46	169	0.703526
46	203	0.723764
46	210	0.702106
55	64	0.735714
56	168	0.709844
56	203	0.731685
56	205	0.765385
56	221	0.795421
58	157	0.750824
59	99	0.715736
59	210	0.781868
64	142	0.769643
68	164	0.74913
68	222	0.841484
71	150	0.704396
71	156	0.800549
71	207	0.780907
80	207	0.707967
85	95	0.875229
85	96	0.978846
85	97	0.785623
85	98	0.797802
85	155	0.899267
85	168	0.880678
85	169	0.85728
85	203	0.953892
85	214	0.811722
90	156	0.735852
94	185	0.720009
95	96	0.886401
95	155	0.858104
95	168	0.783974
95	169	0.723123
95	203	0.883883
95	214	0.742399
96	97	0.804579
96	98	0.813874
96	155	0.878114
96	168	0.865156
96	169	0.836218
96	203	0.963233
96	214	0.798855
97	98	0.798168
97	203	0.737592
98	203	0.761035
99	210	0.765668
101	185	0.703846
101	207	0.750412
113	172	0.746277
121	141	0.718544
121	172	0.814881
126	175	0.725137
149	235	0.772436
150	156	0.711538
150	235	0.70348
155	168	0.832189
155	169	0.745696
155	203	0.873489
155	214	0.754441
156	163	0.720055
156	207	0.762821
157	226	0.717766
159	225	0.74098
163	172	0.736996
163	175	0.725412
163	207	0.721154
165	171	0.706685
166	235	0.726099
168	169	0.874817
168	203	0.893223
168	214	0.739744
168	221	0.755586
169	203	0.848535
169	221	0.7087
175	207	0.766255
180	212	0.761722
193	207	0.781639
194	235	0.709249
203	214	0.755769
203	221	0.733883
205	210	0.73141
205	221	0.712179

## Sheet: Location0.8
15	210	0.863965
38	85	0.89533
38	95	0.831685
38	96	0.903297
38	98	0.858288
38	155	0.809982
38	203	0.893132
46	85	0.814377
68	222	0.841484
71	156	0.800549
85	95	0.875229
85	96	0.978846
85	155	0.899267
85	168	0.880678
85	169	0.85728
85	203	0.953892
85	214	0.811722
95	96	0.886401
95	155	0.858104
95	203	0.883883
96	97	0.804579
96	98	0.813874
96	155	0.878114
96	168	0.865156
96	169	0.836218
96	203	0.963233
121	172	0.814881
155	168	0.832189
155	203	0.873489
168	169	0.874817
168	203	0.893223
169	203	0.848535

## Sheet: Location0.9
38	96	0.903297
85	96	0.978846
85	203	0.953892
96	203	0.963233

## Sheet: Location1
0	0	0
