# Supplementary material for: Network Structure Analysis Identifying Key Genes of Autism and Its Mechanism
Source: Comput Math Methods Med. 2020 Mar 23;2020:3753080. doi: 10.1155/2020/3753080 (PMC7125446; doi:10.1155/2020/3753080)
Supplement: Supplementary Materials — Data1: sheet1 is about 244 genes related to ASD; sheet2 is about the expression profile of 244 genes related to ASD in the control group (C); sheet3 is about the expression profile of 244 genes related to ASD in the experimental group (E). Data2: sheet1 and sheet2 are the Spearman correlation coefficients of C and E, respectively. Data3: the Spearman correlation networks of C at different threshold (0.1–1) (sheet1–sheet10). Data4: the Spearman correlation networks of E at different threshold (0.1–1) (sheet1–sheet10). Data5: comparison of node degree of C and E 's correlation networks under different thresholds (sheet1–sheet4). Data6: analysis of structural key genes (sheet1–sheet5). [file 3753080.f1.zip › 3753080.f1/ProcessedData/Data4-E spearman correlation network at some threshold.xlsx]

## Sheet: Location0.1
1	2	0.135338
1	3	0.388122
1	4	0.803768
1	5	0.660931
1	6	0.109696
1	7	0.579891
1	8	0.390603
1	10	0.472862
1	11	0.411382
1	13	0.175825
1	14	0.369532
1	15	0.122757
1	16	0.25754
1	17	0.252511
1	18	0.662847
1	19	0.620553
1	20	0.37554
1	21	0.587075
1	22	0.325171
1	23	0.377434
1	24	0.369402
1	25	0.212743
1	26	0.326651
1	27	0.554924
1	28	0.584092
1	29	0.479131
1	30	0.225934
1	32	0.101076
1	33	0.104233
1	34	0.311523
1	35	0.446414
1	36	0.724949
1	37	0.453448
1	38	0.100902
1	39	0.258127
1	40	0.343042
1	41	0.436118
1	42	0.128982
1	43	0.399898
1	44	0.27935
1	45	0.141607
1	46	0.161306
1	47	0.149051
1	48	0.565525
1	49	0.168294
1	50	0.623361
1	51	0.269925
1	52	0.383202
1	53	0.126849
1	55	0.147158
1	56	0.156518
1	58	0.666547
1	60	0.53714
1	61	0.18906
1	63	0.11343
1	64	0.181898
1	66	0.280112
1	67	0.401097
1	70	0.518021
1	71	0.490297
1	72	0.398135
1	73	0.407625
1	74	0.372863
1	75	0.667526
1	77	0.279525
1	78	0.589904
1	79	0.251793
1	80	0.441582
1	81	0.65525
1	82	0.493628
1	83	0.466701
1	84	0.207301
1	85	0.262176
1	86	0.309259
1	87	0.530131
1	88	0.330701
1	91	0.390494
1	92	0.544563
1	93	0.238776
1	94	0.118577
1	95	0.133379
1	96	0.151294
1	100	0.330743
1	101	0.461194
1	102	0.25397
1	103	0.380264
1	104	0.371535
1	105	0.741231
1	108	0.27134
1	109	0.390494
1	110	0.359519
1	111	0.26467
1	112	0.371121
1	113	0.45129
1	114	0.604488
1	116	0.479852
1	118	0.581059
1	119	0.247636
1	120	0.292217
1	121	0.598502
1	122	0.298475
1	123	0.296307
1	124	0.322667
1	125	0.325889
1	126	0.299028
1	127	0.332223
1	128	0.391234
1	129	0.527585
1	130	0.137689
1	131	0.520097
1	132	0.110893
1	133	0.438861
1	134	0.383137
1	135	0.315658
1	136	0.299942
1	137	0.464873
1	138	0.544672
1	139	0.310782
1	140	0.254884
1	141	0.286077
1	142	0.170427
1	143	0.12637
1	144	0.519683
1	145	0.218402
1	146	0.148616
1	147	0.414939
1	148	0.581567
1	149	0.237993
1	150	0.342062
1	151	0.449919
1	152	0.241824
1	153	0.569443
1	154	0.646848
1	155	0.272385
1	156	0.299311
1	157	0.708144
1	158	0.141302
1	159	0.176195
1	160	0.277783
1	161	0.43762
1	162	0.220557
1	163	0.549504
1	164	0.368096
1	165	0.378283
1	168	0.227022
1	169	0.269708
1	170	0.581284
1	171	0.629107
1	172	0.585094
1	173	0.455644
1	174	0.278872
1	175	0.492126
1	176	0.598589
1	177	0.356407
1	178	0.19694
1	179	0.32837
1	181	0.52593
1	182	0.231658
1	184	0.208389
1	186	0.19818
1	187	0.205864
1	188	0.489035
1	190	0.139082
1	191	0.118164
1	192	0.397917
1	193	0.244958
1	195	0.604858
1	196	0.429371
1	197	0.546348
1	198	0.152055
1	199	0.386402
1	200	0.683482
1	201	0.604644
1	202	0.684135
1	203	0.152012
1	204	0.39365
1	205	0.330743
1	207	0.58973
1	209	0.444521
1	210	0.141281
1	212	0.142086
1	213	0.599047
1	215	0.578106
1	216	0.514764
1	217	0.276499
1	219	0.396241
1	220	0.536183
1	221	0.236861
1	224	0.248366
1	225	0.211328
1	226	0.508342
1	227	0.200509
1	230	0.384965
1	231	0.464851
1	232	0.204776
1	233	0.662672
1	234	0.385272
1	235	0.109479
1	236	0.237818
1	237	0.336968
1	238	0.369315
1	239	0.561106
1	240	0.552203
1	241	0.314439
1	242	0.175281
1	243	0.31137
2	3	0.102274
2	4	0.121298
2	5	0.187558
2	6	0.216595
2	11	0.156932
2	12	0.253208
2	14	0.150009
2	17	0.262807
2	18	0.122648
2	19	0.148442
2	20	0.169317
2	21	0.199247
2	29	0.216487
2	30	0.257997
2	31	0.132553
2	32	0.214397
2	33	0.256625
2	35	0.243674
2	36	0.161219
2	37	0.125609
2	41	0.203557
2	43	0.217793
2	44	0.308432
2	48	0.230222
2	49	0.174955
2	51	0.185947
2	52	0.215855
2	53	0.163396
2	58	0.152926
2	60	0.162068
2	62	0.245938
2	64	0.196265
2	65	0.14337
2	66	0.182965
2	70	0.165498
2	71	0.107041
2	72	0.190714
2	74	0.129875
2	75	0.195307
2	80	0.137145
2	81	0.294544
2	82	0.122844
2	83	0.122365
2	84	0.122735
2	87	0.115421
2	88	0.158195
2	92	0.230853
2	98	0.166835
2	100	0.21714
2	102	0.166074
2	104	0.150967
2	105	0.204819
2	107	0.122212
2	112	0.117968
2	113	0.120645
2	114	0.128677
2	115	0.429305
2	116	0.197191
2	117	0.231528
2	118	0.128384
2	121	0.261218
2	122	0.200445
2	125	0.10149
2	126	0.148159
2	127	0.168141
2	128	0.1191
2	129	0.194393
2	131	0.215616
2	135	0.410324
2	136	0.128873
2	138	0.120362
2	141	0.162221
2	143	0.131899
2	144	0.251053
2	147	0.181311
2	148	0.10506
2	149	0.206387
2	150	0.12994
2	151	0.161851
2	156	0.13819
2	157	0.109348
2	158	0.216835
2	160	0.115356
2	161	0.200727
2	162	0.109196
2	163	0.242673
2	166	0.239647
2	167	0.181332
2	172	0.241475
2	175	0.192303
2	179	0.102252
2	183	0.158825
2	185	0.185142
2	190	0.188733
2	191	0.167358
2	193	0.207976
2	194	0.172974
2	195	0.159282
2	196	0.141215
2	197	0.162373
2	198	0.225999
2	199	0.34278
2	200	0.11947
2	201	0.167957
2	202	0.152012
2	204	0.221167
2	206	0.137471
2	207	0.147114
2	211	0.134054
2	213	0.159195
2	215	0.102883
2	216	0.201968
2	217	0.149378
2	220	0.246917
2	221	0.127306
2	229	0.12525
2	233	0.155255
2	234	0.127818
2	235	0.104189
2	236	0.102622
2	238	0.190388
2	239	0.15421
2	241	0.135861
2	242	0.268597
2	244	0.261545
3	4	0.310848
3	5	0.383921
3	7	0.471599
3	8	0.246917
3	9	0.198833
3	10	0.232311
3	11	0.311492
3	12	0.226782
3	14	0.290669
3	16	0.140388
3	18	0.283312
3	19	0.314222
3	20	0.426127
3	21	0.406624
3	22	0.278676
3	23	0.488774
3	24	0.216465
3	25	0.185577
3	26	0.389123
3	27	0.3078
3	28	0.382832
3	29	0.339842
3	30	0.346568
3	32	0.112439
3	33	0.215072
3	35	0.361979
3	36	0.417725
3	37	0.157683
3	38	0.182682
3	40	0.358866
3	41	0.102796
3	42	0.349245
3	43	0.268314
3	44	0.251467
3	45	0.173104
3	46	0.214353
3	47	0.10038
3	48	0.389819
3	49	0.227675
3	50	0.395588
3	51	0.219316
3	52	0.201337
3	54	0.14435
3	55	0.103144
3	56	0.110654
3	57	0.120079
3	58	0.488142
3	60	0.292454
3	61	0.217597
3	65	0.209586
3	66	0.406363
3	67	0.294121
3	70	0.270787
3	71	0.30595
3	72	0.299529
3	73	0.229438
3	74	0.266116
3	75	0.410738
3	76	0.144502
3	78	0.279176
3	80	0.419575
3	81	0.427303
3	82	0.344826
3	83	0.414656
3	84	0.144937
3	85	0.191345
3	86	0.10863
3	87	0.176783
3	88	0.162581
3	89	0.346807
3	90	0.103405
3	91	0.449723
3	92	0.370817
3	93	0.369794
3	96	0.159848
3	97	0.218772
3	100	0.26838
3	101	0.443084
3	102	0.112199
3	103	0.42628
3	104	0.214049
3	105	0.394216
3	106	0.105212
3	108	0.230352
3	109	0.347809
3	110	0.241497
3	111	0.233064
3	112	0.354426
3	113	0.342301
3	114	0.545325
3	115	0.279895
3	116	0.245863
3	118	0.343871
3	119	0.304318
3	120	0.333411
3	121	0.29178
3	122	0.167576
3	123	0.323146
3	124	0.390211
3	125	0.28686
3	126	0.453881
3	127	0.290234
3	128	0.268445
3	129	0.267661
3	131	0.212198
3	133	0.325802
3	134	0.356363
3	135	0.15371
3	136	0.377303
3	137	0.189865
3	138	0.349093
3	139	0.335706
3	140	0.283922
3	141	0.251423
3	142	0.220796
3	143	0.114224
3	144	0.488491
3	145	0.372558
3	146	0.295306
3	147	0.55549
3	148	0.382985
3	149	0.181245
3	150	0.344652
3	151	0.263112
3	152	0.112504
3	153	0.254688
3	154	0.446784
3	155	0.29979
3	156	0.337817
3	157	0.526736
3	159	0.32332
3	160	0.122038
3	161	0.288384
3	162	0.136688
3	163	0.425496
3	164	0.282507
3	165	0.365092
3	166	0.203078
3	168	0.324735
3	169	0.199856
3	170	0.403054
3	171	0.256495
3	172	0.239669
3	173	0.29609
3	174	0.230069
3	175	0.424887
3	176	0.381156
3	177	0.403424
3	178	0.140954
3	179	0.377673
3	181	0.417007
3	182	0.112504
3	183	0.195176
3	184	0.17946
3	185	0.163222
3	186	0.167597
3	187	0.177414
3	188	0.538991
3	189	0.306821
3	190	0.268532
3	191	0.138625
3	192	0.190039
3	193	0.284161
3	194	0.257866
3	195	0.438078
3	196	0.206387
3	197	0.439841
3	199	0.185272
3	200	0.400268
3	201	0.40076
3	202	0.388492
3	203	0.193413
3	204	0.216791
3	206	0.280809
3	207	0.430764
3	208	0.191432
3	209	0.422079
3	213	0.274779
3	215	0.322167
3	216	0.475583
3	217	0.100293
3	220	0.238167
3	221	0.117032
3	224	0.168676
3	225	0.166879
3	226	0.49058
3	227	0.287644
3	228	0.215202
3	229	0.114932
3	230	0.355906
3	231	0.471904
3	233	0.399005
3	235	0.315484
3	236	0.278262
3	237	0.378718
3	238	0.255385
3	239	0.254841
3	240	0.301705
3	241	0.130375
3	242	0.198398
3	243	0.219403
4	5	0.645041
4	6	0.16024
4	7	0.567027
4	8	0.349659
4	10	0.496893
4	11	0.363178
4	13	0.319337
4	14	0.268532
4	15	0.126283
4	16	0.360521
4	17	0.22663
4	18	0.764413
4	19	0.548982
4	20	0.413393
4	21	0.588076
4	22	0.368009
4	23	0.450855
4	24	0.305841
4	25	0.274801
4	26	0.315571
4	27	0.6204
4	28	0.628715
4	29	0.452836
4	30	0.304753
4	33	0.105495
4	34	0.294871
4	35	0.60451
4	36	0.707252
4	37	0.357998
4	39	0.312284
4	40	0.377151
4	41	0.469575
4	42	0.148159
4	43	0.365527
4	44	0.176348
4	45	0.16233
4	46	0.198507
4	47	0.266334
4	48	0.693212
4	49	0.106627
4	50	0.65144
4	51	0.315092
4	52	0.32689
4	53	0.153492
4	55	0.200836
4	56	0.121886
4	57	0.142042
4	58	0.669181
4	59	0.139365
4	60	0.531677
4	62	0.129504
4	63	0.168316
4	64	0.238297
4	66	0.264222
4	67	0.322038
4	69	0.17798
4	70	0.553132
4	71	0.51644
4	72	0.336685
4	73	0.385705
4	74	0.268663
4	75	0.50634
4	77	0.371578
4	78	0.628215
4	79	0.171211
4	80	0.345588
4	81	0.704988
4	82	0.495913
4	83	0.484529
4	84	0.165399
4	85	0.241671
4	86	0.207453
4	87	0.428304
4	88	0.312787
4	89	0.152817
4	91	0.452009
4	92	0.547415
4	93	0.233661
4	94	0.207235
4	95	0.168403
4	96	0.153274
4	99	0.188603
4	100	0.422971
4	101	0.398418
4	102	0.283552
4	103	0.364047
4	104	0.239603
4	105	0.763564
4	106	0.113745
4	108	0.342497
4	109	0.294892
4	110	0.512696
4	111	0.299998
4	112	0.260718
4	113	0.521925
4	114	0.575799
4	116	0.543478
4	118	0.541508
4	119	0.151511
4	120	0.347571
4	121	0.674296
4	122	0.373278
4	123	0.393585
4	124	0.341365
4	125	0.314548
4	126	0.36753
4	127	0.237274
4	128	0.360368
4	129	0.461477
4	131	0.560736
4	133	0.46779
4	134	0.461651
4	135	0.225411
4	136	0.328153
4	137	0.420424
4	138	0.638794
4	139	0.350225
4	140	0.322254
4	141	0.271188
4	142	0.195786
4	144	0.530088
4	145	0.189909
4	147	0.421208
4	148	0.609734
4	149	0.134554
4	150	0.321035
4	151	0.379066
4	152	0.145329
4	153	0.533636
4	154	0.676037
4	155	0.290887
4	156	0.294979
4	157	0.694823
4	158	0.211088
4	159	0.143936
4	160	0.281505
4	161	0.477324
4	162	0.230243
4	163	0.586378
4	164	0.455665
4	165	0.224432
4	168	0.270556
4	169	0.35201
4	170	0.465635
4	171	0.667374
4	172	0.648241
4	173	0.41803
4	174	0.316638
4	175	0.513349
4	176	0.55512
4	177	0.317835
4	178	0.409475
4	179	0.18623
4	180	0.105125
4	181	0.540906
4	182	0.333507
4	184	0.11331
4	186	0.194284
4	187	0.284792
4	188	0.552095
4	191	0.11085
4	192	0.473885
4	193	0.276455
4	194	0.177697
4	195	0.581241
4	196	0.495478
4	197	0.49637
4	199	0.230635
4	200	0.689033
4	201	0.592128
4	202	0.690252
4	203	0.153906
4	204	0.395152
4	205	0.43725
4	207	0.616482
4	209	0.480001
4	210	0.155756
4	212	0.105626
4	213	0.548634
4	214	0.137362
4	215	0.515068
4	216	0.43836
4	217	0.229656
4	219	0.349223
4	220	0.519748
4	221	0.295611
4	223	0.129352
4	224	0.237101
4	225	0.244697
4	226	0.440885
4	227	0.131072
4	230	0.440363
4	231	0.362872
4	232	0.368662
4	233	0.743015
4	234	0.480461
4	236	0.110001
4	237	0.310848
4	238	0.426824
4	239	0.600984
4	240	0.502574
4	241	0.276499
4	243	0.117728
5	7	0.557297
5	8	0.497546
5	9	0.17404
5	10	0.477629
5	11	0.516214
5	14	0.333965
5	16	0.326629
5	17	0.201859
5	18	0.635224
5	19	0.622664
5	20	0.48738
5	21	0.5263
5	22	0.321775
5	23	0.433202
5	24	0.440668
5	26	0.446066
5	27	0.586117
5	28	0.501464
5	29	0.519117
5	30	0.262568
5	34	0.102274
5	35	0.565982
5	36	0.723055
5	37	0.448017
5	39	0.176696
5	40	0.473493
5	41	0.316747
5	42	0.288427
5	43	0.523623
5	44	0.530828
5	47	0.172865
5	48	0.587336
5	49	0.113701
5	50	0.585703
5	51	0.272777
5	52	0.302794
5	55	0.160414
5	57	0.140083
5	58	0.619225
5	60	0.479392
5	61	0.32824
5	63	0.255125
5	65	0.283856
5	66	0.27713
5	67	0.318185
5	70	0.565071
5	71	0.527389
5	72	0.335358
5	73	0.371056
5	74	0.337534
5	75	0.668441
5	76	0.133205
5	77	0.246895
5	78	0.616439
5	79	0.151011
5	80	0.542038
5	81	0.606143
5	82	0.618028
5	83	0.545869
5	84	0.191041
5	85	0.133444
5	86	0.131442
5	87	0.258367
5	88	0.223867
5	89	0.157933
5	90	0.260957
5	91	0.526104
5	92	0.523384
5	93	0.292193
5	100	0.359933
5	101	0.426258
5	102	0.116292
5	103	0.537315
5	104	0.255733
5	105	0.658471
5	108	0.220513
5	109	0.398505
5	110	0.407037
5	111	0.192457
5	112	0.336794
5	113	0.532373
5	114	0.635115
5	115	0.141433
5	116	0.459412
5	118	0.491747
5	119	0.298832
5	120	0.317586
5	121	0.562695
5	122	0.424486
5	123	0.328588
5	124	0.466571
5	125	0.386554
5	126	0.402118
5	127	0.526997
5	128	0.461782
5	129	0.548982
5	131	0.433485
5	132	0.192673
5	133	0.383942
5	134	0.51792
5	135	0.237579
5	136	0.39032
5	137	0.427847
5	138	0.562369
5	139	0.436162
5	140	0.409366
5	141	0.406123
5	143	0.198572
5	144	0.579543
5	145	0.295524
5	146	0.295393
5	147	0.484398
5	148	0.547893
5	149	0.132639
5	150	0.418313
5	151	0.517354
5	152	0.333399
5	153	0.528499
5	154	0.637988
5	155	0.112004
5	156	0.619638
5	157	0.717025
5	158	0.195481
5	159	0.247222
5	160	0.222233
5	161	0.535356
5	162	0.326651
5	163	0.704574
5	164	0.301531
5	165	0.404055
5	166	0.238123
5	168	0.204972
5	170	0.494542
5	171	0.56041
5	172	0.591537
5	173	0.404665
5	174	0.241192
5	175	0.648241
5	176	0.455208
5	177	0.384922
5	178	0.22663
5	179	0.440603
5	181	0.563697
5	183	0.112243
5	184	0.421883
5	185	0.15445
5	186	0.170623
5	187	0.15014
5	188	0.479392
5	189	0.138298
5	190	0.304165
5	191	0.151511
5	192	0.264701
5	193	0.25545
5	195	0.440907
5	196	0.419902
5	197	0.483484
5	199	0.38601
5	200	0.588424
5	201	0.544337
5	202	0.51065
5	204	0.329415
5	205	0.149835
5	207	0.700243
5	208	0.241954
5	209	0.479327
5	213	0.582308
5	215	0.549461
5	216	0.632742
5	217	0.127676
5	219	0.151751
5	220	0.452183
5	221	0.106018
5	224	0.144209
5	225	0.218772
5	226	0.541624
5	227	0.116292
5	228	0.18808
5	230	0.451443
5	231	0.550179
5	232	0.27417
5	233	0.655642
5	234	0.155898
5	235	0.263591
5	236	0.400572
5	237	0.451922
5	238	0.141738
5	239	0.565264
5	240	0.414112
5	241	0.235032
5	242	0.279612
5	243	0.368488
6	9	0.23229
6	12	0.272777
6	13	0.214223
6	14	0.124346
6	15	0.144763
6	17	0.312154
6	19	0.162417
6	23	0.281375
6	24	0.210087
6	26	0.108826
6	29	0.213134
6	30	0.167162
6	31	0.160208
6	34	0.185229
6	38	0.255668
6	39	0.293782
6	41	0.128242
6	42	0.209782
6	44	0.141237
6	45	0.124063
6	47	0.190714
6	49	0.102295
6	50	0.196961
6	51	0.172038
6	53	0.179504
6	54	0.251292
6	55	0.362828
6	58	0.120471
6	60	0.118838
6	61	0.144937
6	62	0.273038
6	64	0.432549
6	65	0.423123
6	66	0.143
6	68	0.185055
6	71	0.109718
6	73	0.129766
6	74	0.300987
6	77	0.247048
6	78	0.174106
6	86	0.223626
6	87	0.129374
6	88	0.17945
6	90	0.19768
6	93	0.174062
6	94	0.145373
6	97	0.206365
6	98	0.336446
6	99	0.118294
6	102	0.286969
6	103	0.169992
6	105	0.194458
6	106	0.188929
6	107	0.23464
6	108	0.282507
6	109	0.171864
6	111	0.145918
6	114	0.152817
6	115	0.307126
6	118	0.275739
6	126	0.126675
6	127	0.206691
6	133	0.251053
6	134	0.111764
6	135	0.205298
6	136	0.211001
6	141	0.309237
6	142	0.330547
6	143	0.130919
6	145	0.116139
6	146	0.144894
6	148	0.146701
6	149	0.169164
6	150	0.105386
6	151	0.134489
6	154	0.193696
6	155	0.323059
6	156	0.145721
6	158	0.140279
6	161	0.191781
6	162	0.145525
6	164	0.223409
6	165	0.17822
6	166	0.271971
6	168	0.201728
6	170	0.192194
6	173	0.152404
6	176	0.19731
6	178	0.101599
6	179	0.134598
6	180	0.182682
6	182	0.15088
6	183	0.501856
6	184	0.261958
6	185	0.494651
6	188	0.121625
6	189	0.174911
6	191	0.193435
6	193	0.377782
6	194	0.378609
6	199	0.13967
6	200	0.107258
6	202	0.167902
6	204	0.140432
6	205	0.203165
6	208	0.281658
6	209	0.101599
6	210	0.123976
6	211	0.170753
6	214	0.184989
6	220	0.211545
6	223	0.23488
6	224	0.129407
6	227	0.212046
6	229	0.170831
6	230	0.180505
6	231	0.12415
6	232	0.495652
6	235	0.239756
6	242	0.183008
7	8	0.316007
7	9	0.305428
7	10	0.441996
7	11	0.434227
7	12	0.134859
7	14	0.293412
7	16	0.301618
7	18	0.582308
7	19	0.549896
7	20	0.526474
7	21	0.556666
7	22	0.420468
7	23	0.482047
7	24	0.38995
7	25	0.194458
7	26	0.505208
7	27	0.574972
7	28	0.460824
7	29	0.559125
7	30	0.333268
7	35	0.418226
7	36	0.711845
7	37	0.522537
7	38	0.113658
7	40	0.406319
7	41	0.218968
7	42	0.331592
7	43	0.395457
7	44	0.38588
7	45	0.145503
7	46	0.191628
7	47	0.11344
7	48	0.658079
7	49	0.185773
7	50	0.521751
7	51	0.29117
7	52	0.251597
7	54	0.123606
7	56	0.150118
7	57	0.117228
7	58	0.565329
7	60	0.350421
7	61	0.250313
7	63	0.189605
7	65	0.314701
7	66	0.361478
7	67	0.420296
7	68	0.100053
7	69	0.249878
7	70	0.597983
7	71	0.625973
7	72	0.361761
7	73	0.465722
7	74	0.435857
7	75	0.464046
7	78	0.589295
7	80	0.481177
7	81	0.590122
7	82	0.54317
7	83	0.468486
7	84	0.198899
7	85	0.278327
7	87	0.190279
7	88	0.220634
7	89	0.251184
7	90	0.207061
7	91	0.414678
7	92	0.534463
7	93	0.455796
7	96	0.140649
7	97	0.217466
7	98	0.159152
7	100	0.339406
7	101	0.498678
7	102	0.161154
7	103	0.341148
7	104	0.362219
7	105	0.626865
7	107	0.136709
7	108	0.110567
7	109	0.286468
7	110	0.348375
7	111	0.314006
7	112	0.39833
7	113	0.484464
7	114	0.593365
7	115	0.10051
7	116	0.433269
7	118	0.428252
7	119	0.305428
7	120	0.266487
7	121	0.485487
7	122	0.254875
7	123	0.293739
7	124	0.496131
7	125	0.284553
7	126	0.503401
7	127	0.497524
7	128	0.537032
7	129	0.477803
7	131	0.47149
7	133	0.551899
7	134	0.535399
7	135	0.281201
7	136	0.479631
7	137	0.339232
7	138	0.588707
7	139	0.287339
7	140	0.35867
7	141	0.487859
7	142	0.130963
7	143	0.254841
7	144	0.612847
7	145	0.375497
7	146	0.355101
7	147	0.561237
7	148	0.511564
7	149	0.288536
7	150	0.515417
7	151	0.421295
7	152	0.262024
7	153	0.559822
7	154	0.56707
7	155	0.129548
7	156	0.453663
7	157	0.709711
7	159	0.298223
7	160	0.153906
7	161	0.51755
7	162	0.350072
7	163	0.618006
7	164	0.257278
7	165	0.445565
7	166	0.153361
7	168	0.172887
7	169	0.272624
7	170	0.4216
7	171	0.517789
7	172	0.487794
7	173	0.399484
7	174	0.344456
7	175	0.671575
7	176	0.512282
7	177	0.444259
7	178	0.333878
7	179	0.38133
7	180	0.139452
7	181	0.436097
7	182	0.213526
7	183	0.342933
7	184	0.305449
7	185	0.243783
7	186	0.170514
7	187	0.174193
7	188	0.557079
7	189	0.306146
7	190	0.350159
7	192	0.337077
7	193	0.490167
7	194	0.184489
7	195	0.47136
7	196	0.354818
7	197	0.468748
7	199	0.356907
7	200	0.512152
7	201	0.590876
7	202	0.510018
7	203	0.170666
7	204	0.38749
7	205	0.258301
7	206	0.129831
7	207	0.717526
7	208	0.307953
7	209	0.424669
7	211	0.125695
7	212	0.138581
7	213	0.628258
7	214	0.184924
7	215	0.49341
7	216	0.504185
7	220	0.398722
7	221	0.181441
7	222	0.149204
7	223	0.137928
7	225	0.354491
7	226	0.536901
7	227	0.334792
7	229	0.160284
7	230	0.524015
7	231	0.559452
7	233	0.608036
7	234	0.12476
7	235	0.276216
7	236	0.219817
7	237	0.523971
7	238	0.367726
7	239	0.5428
7	240	0.548525
7	242	0.335379
7	243	0.231985
8	9	0.263613
8	10	0.282811
8	11	0.50188
8	13	0.200683
8	14	0.143566
8	15	0.172386
8	16	0.219556
8	17	0.142761
8	18	0.318684
8	19	0.445435
8	20	0.325105
8	21	0.3078
8	22	0.255298
8	23	0.365114
8	24	0.375518
8	26	0.308889
8	27	0.306668
8	28	0.372101
8	29	0.291235
8	30	0.261588
8	31	0.170918
8	34	0.109762
8	35	0.355645
8	36	0.522295
8	37	0.336252
8	39	0.277239
8	40	0.510236
8	41	0.293129
8	42	0.115704
8	43	0.316202
8	44	0.372776
8	46	0.149117
8	48	0.152665
8	49	0.141759
8	50	0.491734
8	51	0.110132
8	52	0.276586
8	53	0.171385
8	54	0.104429
8	57	0.233051
8	58	0.556666
8	59	0.109326
8	60	0.362828
8	61	0.171689
8	64	0.106257
8	65	0.147615
8	66	0.2031
8	67	0.291324
8	68	0.176805
8	70	0.324966
8	71	0.283007
8	72	0.386663
8	73	0.468073
8	74	0.316072
8	75	0.234553
8	76	0.23858
8	77	0.167728
8	78	0.446959
8	80	0.37689
8	81	0.478586
8	82	0.409258
8	83	0.322428
8	85	0.212307
8	86	0.174759
8	87	0.194893
8	88	0.335055
8	89	0.217967
8	90	0.104603
8	91	0.287383
8	92	0.313177
8	93	0.299398
8	95	0.2137
8	96	0.147027
8	100	0.211415
8	101	0.334966
8	102	0.120667
8	103	0.520576
8	104	0.285794
8	105	0.393019
8	108	0.286142
8	109	0.493345
8	110	0.311087
8	112	0.345305
8	113	0.162134
8	114	0.483789
8	116	0.366846
8	118	0.519849
8	119	0.43331
8	120	0.254537
8	121	0.21875
8	122	0.101991
8	123	0.234249
8	124	0.433441
8	125	0.177567
8	126	0.141868
8	127	0.175042
8	128	0.377086
8	129	0.370751
8	130	0.180135
8	131	0.303947
8	133	0.400594
8	134	0.409236
8	136	0.403511
8	137	0.275998
8	138	0.472013
8	139	0.117162
8	140	0.378
8	141	0.168468
8	143	0.181115
8	144	0.337447
8	145	0.254187
8	146	0.26124
8	147	0.220165
8	148	0.412087
8	149	0.143631
8	150	0.439188
8	151	0.341648
8	152	0.209369
8	153	0.444608
8	154	0.551333
8	155	0.178394
8	156	0.268837
8	157	0.542125
8	158	0.145678
8	159	0.171842
8	160	0.213853
8	161	0.354774
8	162	0.235533
8	163	0.361805
8	164	0.425779
8	165	0.367747
8	166	0.196874
8	167	0.242934
8	168	0.25915
8	169	0.232573
8	170	0.642646
8	171	0.429305
8	172	0.271993
8	173	0.270818
8	174	0.279808
8	175	0.356515
8	176	0.303251
8	177	0.295632
8	178	0.223387
8	179	0.281266
8	180	0.153601
8	181	0.408605
8	184	0.116792
8	187	0.208215
8	188	0.311893
8	189	0.172647
8	190	0.297243
8	191	0.163984
8	192	0.198768
8	195	0.349659
8	196	0.154363
8	197	0.236687
8	198	0.148594
8	199	0.184859
8	200	0.312546
8	201	0.432834
8	202	0.349572
8	203	0.160175
8	204	0.225651
8	206	0.126109
8	207	0.434312
8	208	0.176761
8	209	0.389907
8	210	0.171537
8	212	0.10519
8	213	0.398592
8	215	0.394478
8	216	0.413437
8	219	0.177088
8	220	0.452553
8	221	0.157084
8	222	0.176718
8	224	0.193904
8	225	0.18044
8	226	0.528281
8	228	0.225106
8	229	0.274868
8	230	0.239103
8	231	0.518138
8	232	0.208759
8	233	0.390951
8	234	0.182052
8	235	0.243086
8	236	0.267204
8	237	0.482135
8	238	0.20606
8	239	0.353577
8	240	0.310173
8	241	0.20939
8	242	0.248006
8	243	0.25471
9	10	0.108477
9	11	0.181301
9	13	0.141389
9	14	0.101272
9	19	0.115791
9	20	0.237949
9	22	0.113788
9	24	0.192455
9	29	0.315245
9	34	0.219882
9	36	0.185446
9	37	0.149999
9	38	0.284662
9	39	0.107541
9	40	0.264832
9	41	0.174084
9	42	0.304165
9	43	0.185272
9	44	0.253186
9	45	0.142543
9	46	0.166422
9	47	0.161698
9	48	0.156213
9	50	0.136775
9	51	0.118991
9	60	0.13832
9	61	0.3041
9	64	0.242651
9	65	0.427499
9	70	0.135763
9	71	0.210261
9	73	0.290299
9	74	0.36322
9	77	0.241671
9	80	0.202882
9	82	0.144328
9	85	0.151315
9	86	0.215551
9	89	0.176957
9	90	0.309455
9	93	0.151359
9	94	0.146701
9	96	0.135817
9	97	0.265267
9	98	0.228284
9	101	0.161611
9	102	0.174214
9	103	0.207671
9	106	0.407669
9	108	0.151968
9	109	0.151859
9	112	0.389667
9	114	0.161611
9	115	0.18377
9	120	0.124553
9	121	0.121538
9	124	0.237492
9	125	0.153993
9	126	0.267248
9	127	0.239886
9	128	0.120362
9	129	0.133466
9	132	0.28649
9	133	0.171929
9	134	0.180396
9	136	0.125042
9	138	0.191998
9	140	0.136035
9	141	0.229416
9	142	0.247331
9	143	0.115095
9	145	0.215703
9	146	0.288449
9	147	0.185904
9	149	0.221798
9	150	0.267291
9	151	0.317313
9	152	0.190627
9	153	0.148616
9	156	0.276564
9	157	0.129134
9	158	0.32676
9	159	0.215311
9	162	0.16468
9	163	0.195873
9	164	0.106584
9	165	0.177218
9	166	0.29696
9	170	0.165072
9	173	0.11997
9	175	0.278066
9	177	0.29622
9	179	0.229656
9	182	0.106192
9	183	0.257518
9	184	0.329393
9	185	0.273212
9	189	0.266377
9	190	0.296786
9	191	0.416397
9	192	0.216051
9	194	0.307996
9	197	0.10223
9	199	0.239386
9	202	0.205646
9	203	0.133858
9	204	0.149334
9	207	0.22774
9	208	0.363133
9	209	0.120732
9	213	0.147724
9	216	0.245241
9	218	0.154232
9	219	0.192238
9	220	0.111938
9	221	0.146069
9	224	0.264594
9	225	0.10469
9	226	0.236687
9	228	0.138756
9	229	0.329428
9	230	0.106018
9	231	0.421012
9	232	0.114028
9	234	0.283705
9	235	0.477977
9	236	0.369358
9	237	0.3312
9	239	0.137928
9	240	0.15223
9	242	0.31703
10	11	0.189866
10	14	0.443019
10	16	0.189756
10	18	0.405905
10	19	0.320861
10	20	0.114159
10	21	0.253447
10	22	0.197179
10	23	0.23353
10	24	0.427237
10	25	0.170906
10	26	0.253099
10	27	0.460672
10	28	0.408104
10	29	0.261197
10	31	0.102274
10	32	0.293238
10	33	0.234053
10	35	0.479065
10	36	0.379676
10	37	0.313298
10	40	0.217444
10	41	0.174867
10	42	0.298157
10	43	0.243217
10	44	0.137079
10	48	0.340495
10	50	0.308257
10	53	0.173997
10	55	0.122104
10	56	0.121581
10	57	0.111677
10	58	0.386489
10	60	0.208324
10	61	0.152512
10	63	0.204722
10	67	0.181954
10	69	0.147114
10	70	0.252948
10	71	0.203753
10	72	0.413763
10	73	0.301357
10	74	0.279742
10	75	0.358736
10	76	0.133183
10	77	0.200183
10	78	0.288036
10	80	0.285489
10	81	0.425365
10	82	0.314156
10	83	0.215442
10	84	0.177784
10	85	0.122735
10	86	0.173844
10	88	0.19743
10	89	0.120602
10	90	0.117293
10	91	0.268293
10	92	0.217488
10	100	0.184576
10	101	0.442845
10	102	0.146483
10	103	0.29474
10	104	0.154755
10	105	0.398505
10	106	0.160109
10	108	0.155647
10	109	0.23919
10	110	0.248724
10	111	0.178787
10	112	0.268031
10	113	0.168316
10	114	0.204493
10	115	0.110567
10	116	0.359532
10	117	0.250073
10	118	0.132455
10	119	0.210675
10	120	0.261165
10	121	0.504664
10	123	0.145264
10	124	0.220644
10	125	0.385792
10	126	0.265441
10	127	0.287513
10	128	0.369053
10	129	0.200183
10	130	0.104341
10	131	0.242934
10	133	0.310565
10	134	0.283486
10	135	0.199639
10	136	0.226978
10	137	0.235729
10	138	0.41705
10	139	0.256625
10	140	0.170971
10	141	0.355536
10	142	0.105169
10	144	0.344587
10	145	0.292716
10	146	0.201054
10	147	0.284945
10	148	0.247897
10	150	0.254971
10	151	0.112657
10	152	0.176282
10	153	0.444847
10	154	0.446959
10	155	0.169252
10	156	0.307626
10	157	0.414003
10	159	0.172908
10	160	0.199225
10	161	0.193348
10	162	0.32184
10	163	0.32763
10	164	0.126239
10	165	0.335554
10	168	0.15027
10	169	0.136753
10	170	0.245894
10	171	0.41742
10	172	0.474277
10	173	0.248201
10	174	0.375257
10	175	0.276477
10	176	0.364069
10	177	0.163505
10	178	0.148137
10	179	0.15482
10	181	0.297853
10	184	0.160109
10	185	0.100445
10	188	0.387316
10	189	0.206038
10	190	0.124302
10	192	0.155495
10	193	0.111481
10	195	0.40436
10	196	0.432527
10	197	0.391822
10	199	0.186448
10	200	0.322624
10	201	0.335262
10	202	0.390843
10	204	0.206321
10	207	0.328262
10	209	0.33218
10	211	0.198942
10	212	0.118686
10	213	0.267857
10	215	0.277674
10	216	0.358997
10	217	0.262133
10	218	0.112091
10	220	0.219795
10	224	0.251033
10	225	0.272102
10	226	0.234466
10	230	0.307365
10	231	0.220666
10	232	0.198942
10	233	0.438165
10	236	0.186034
10	237	0.214114
10	238	0.161611
10	239	0.493236
10	240	0.405971
10	243	0.227174
10	244	0.105626
11	16	0.105822
11	18	0.350531
11	19	0.42416
11	20	0.507289
11	21	0.343816
11	22	0.252937
11	23	0.403959
11	24	0.349334
11	26	0.333422
11	27	0.332486
11	28	0.329297
11	29	0.370612
11	30	0.24595
11	33	0.101893
11	34	0.102035
11	35	0.232367
11	36	0.589766
11	37	0.364312
11	38	0.154374
11	40	0.496787
11	41	0.231866
11	42	0.333194
11	43	0.474856
11	44	0.474845
11	48	0.331692
11	49	0.112995
11	50	0.31554
11	51	0.293686
11	52	0.311426
11	56	0.25408
11	57	0.168599
11	58	0.43106
11	60	0.437035
11	61	0.283107
11	62	0.226501
11	63	0.172758
11	65	0.258738
11	66	0.288222
11	67	0.233021
11	69	0.111645
11	70	0.255736
11	71	0.472647
11	72	0.31135
11	73	0.508998
11	74	0.304635
11	75	0.451075
11	78	0.418021
11	80	0.468826
11	81	0.442455
11	82	0.609868
11	83	0.510522
11	84	0.186666
11	85	0.194492
11	86	0.23831
11	87	0.226207
11	88	0.376393
11	89	0.143099
11	90	0.268468
11	91	0.314866
11	92	0.404362
11	93	0.499464
11	95	0.143893
11	96	0.155789
11	98	0.180659
11	100	0.225391
11	101	0.353046
11	103	0.603948
11	104	0.272147
11	105	0.38943
11	108	0.132095
11	109	0.317913
11	110	0.271222
11	111	0.214508
11	112	0.272571
11	113	0.380614
11	114	0.497483
11	116	0.324282
11	118	0.449184
11	119	0.210741
11	120	0.182782
11	121	0.25654
11	123	0.183499
11	124	0.444958
11	125	0.266259
11	126	0.284924
11	127	0.363527
11	128	0.352251
11	129	0.400858
11	130	0.145918
11	131	0.333226
11	133	0.332203
11	134	0.412917
11	135	0.201555
11	136	0.487938
11	137	0.281844
11	138	0.465463
11	139	0.192663
11	140	0.323768
11	141	0.186079
11	143	0.237765
11	144	0.478785
11	145	0.325314
11	146	0.339898
11	147	0.361589
11	148	0.369306
11	149	0.312068
11	150	0.407246
11	151	0.380875
11	152	0.321613
11	153	0.398496
11	154	0.419403
11	155	0.1085
11	156	0.413711
11	157	0.575008
11	158	0.120189
11	159	0.244981
11	160	0.160861
11	161	0.280484
11	162	0.162788
11	163	0.482649
11	164	0.210436
11	165	0.213125
11	166	0.391149
11	168	0.122746
11	169	0.216564
11	170	0.436654
11	171	0.33561
11	172	0.28906
11	173	0.275869
11	174	0.285632
11	175	0.481397
11	176	0.438755
11	177	0.393489
11	178	0.161634
11	179	0.343566
11	181	0.384957
11	182	0.109436
11	183	0.23166
11	184	0.206997
11	186	0.143621
11	187	0.354417
11	188	0.387373
11	189	0.227132
11	190	0.483563
11	191	0.255952
11	193	0.18031
11	195	0.298529
11	196	0.178819
11	197	0.277817
11	199	0.296701
11	200	0.314909
11	201	0.403962
11	202	0.30494
11	203	0.154102
11	204	0.156138
11	205	0.192783
11	207	0.484608
11	208	0.216357
11	209	0.321864
11	213	0.486882
11	215	0.474159
11	216	0.476347
11	217	0.186002
11	218	0.14508
11	219	0.22009
11	220	0.285349
11	223	0.154897
11	225	0.189387
11	226	0.543238
11	227	0.26147
11	229	0.173955
11	230	0.370296
11	231	0.460566
11	233	0.339582
11	234	0.11872
11	235	0.357051
11	236	0.401826
11	237	0.394937
11	238	0.222408
11	239	0.273333
11	240	0.188168
11	241	0.159642
11	242	0.264376
11	243	0.230615
11	244	0.133314
12	14	0.185991
12	15	0.117162
12	16	0.148464
12	17	0.231136
12	23	0.237753
12	26	0.192368
12	28	0.104385
12	32	0.162482
12	37	0.136645
12	38	0.285532
12	39	0.119862
12	40	0.136426
12	41	0.19226
12	43	0.127088
12	45	0.145112
12	47	0.192085
12	50	0.214527
12	54	0.176652
12	55	0.135077
12	56	0.102709
12	58	0.12637
12	60	0.150684
12	61	0.230788
12	62	0.10876
12	64	0.242128
12	66	0.104842
12	67	0.155104
12	68	0.20902
12	76	0.107454
12	77	0.159522
12	78	0.239473
12	83	0.183574
12	85	0.159717
12	87	0.324191
12	89	0.222712
12	93	0.141759
12	94	0.189713
12	95	0.135469
12	96	0.154123
12	97	0.135556
12	98	0.216182
12	99	0.130179
12	101	0.1834
12	103	0.208433
12	104	0.274583
12	109	0.174302
12	113	0.103863
12	114	0.258759
12	115	0.22158
12	117	0.138211
12	121	0.103144
12	123	0.100053
12	124	0.128873
12	126	0.135556
12	133	0.227675
12	134	0.279024
12	135	0.230853
12	136	0.172734
12	139	0.10863
12	143	0.115486
12	145	0.222734
12	148	0.223517
12	150	0.194719
12	154	0.238776
12	157	0.153405
12	158	0.164376
12	160	0.201032
12	162	0.16738
12	164	0.190496
12	167	0.140497
[truncated: 18,825 more rows]

## Sheet: Location0.2
1	3	0.388122
1	4	0.803768
1	5	0.660931
1	7	0.579891
1	8	0.390603
1	10	0.472862
1	11	0.411382
1	14	0.369532
1	16	0.25754
1	17	0.252511
1	18	0.662847
1	19	0.620553
1	20	0.37554
1	21	0.587075
1	22	0.325171
1	23	0.377434
1	24	0.369402
1	25	0.212743
1	26	0.326651
1	27	0.554924
1	28	0.584092
1	29	0.479131
1	30	0.225934
1	34	0.311523
1	35	0.446414
1	36	0.724949
1	37	0.453448
1	39	0.258127
1	40	0.343042
1	41	0.436118
1	43	0.399898
1	44	0.27935
1	48	0.565525
1	50	0.623361
1	51	0.269925
1	52	0.383202
1	58	0.666547
1	60	0.53714
1	66	0.280112
1	67	0.401097
1	70	0.518021
1	71	0.490297
1	72	0.398135
1	73	0.407625
1	74	0.372863
1	75	0.667526
1	77	0.279525
1	78	0.589904
1	79	0.251793
1	80	0.441582
1	81	0.65525
1	82	0.493628
1	83	0.466701
1	84	0.207301
1	85	0.262176
1	86	0.309259
1	87	0.530131
1	88	0.330701
1	91	0.390494
1	92	0.544563
1	93	0.238776
1	100	0.330743
1	101	0.461194
1	102	0.25397
1	103	0.380264
1	104	0.371535
1	105	0.741231
1	108	0.27134
1	109	0.390494
1	110	0.359519
1	111	0.26467
1	112	0.371121
1	113	0.45129
1	114	0.604488
1	116	0.479852
1	118	0.581059
1	119	0.247636
1	120	0.292217
1	121	0.598502
1	122	0.298475
1	123	0.296307
1	124	0.322667
1	125	0.325889
1	126	0.299028
1	127	0.332223
1	128	0.391234
1	129	0.527585
1	131	0.520097
1	133	0.438861
1	134	0.383137
1	135	0.315658
1	136	0.299942
1	137	0.464873
1	138	0.544672
1	139	0.310782
1	140	0.254884
1	141	0.286077
1	144	0.519683
1	145	0.218402
1	147	0.414939
1	148	0.581567
1	149	0.237993
1	150	0.342062
1	151	0.449919
1	152	0.241824
1	153	0.569443
1	154	0.646848
1	155	0.272385
1	156	0.299311
1	157	0.708144
1	160	0.277783
1	161	0.43762
1	162	0.220557
1	163	0.549504
1	164	0.368096
1	165	0.378283
1	168	0.227022
1	169	0.269708
1	170	0.581284
1	171	0.629107
1	172	0.585094
1	173	0.455644
1	174	0.278872
1	175	0.492126
1	176	0.598589
1	177	0.356407
1	179	0.32837
1	181	0.52593
1	182	0.231658
1	184	0.208389
1	187	0.205864
1	188	0.489035
1	192	0.397917
1	193	0.244958
1	195	0.604858
1	196	0.429371
1	197	0.546348
1	199	0.386402
1	200	0.683482
1	201	0.604644
1	202	0.684135
1	204	0.39365
1	205	0.330743
1	207	0.58973
1	209	0.444521
1	213	0.599047
1	215	0.578106
1	216	0.514764
1	217	0.276499
1	219	0.396241
1	220	0.536183
1	221	0.236861
1	224	0.248366
1	225	0.211328
1	226	0.508342
1	227	0.200509
1	230	0.384965
1	231	0.464851
1	232	0.204776
1	233	0.662672
1	234	0.385272
1	236	0.237818
1	237	0.336968
1	238	0.369315
1	239	0.561106
1	240	0.552203
1	241	0.314439
1	243	0.31137
2	6	0.216595
2	12	0.253208
2	17	0.262807
2	29	0.216487
2	30	0.257997
2	32	0.214397
2	33	0.256625
2	35	0.243674
2	41	0.203557
2	43	0.217793
2	44	0.308432
2	48	0.230222
2	52	0.215855
2	62	0.245938
2	81	0.294544
2	92	0.230853
2	100	0.21714
2	105	0.204819
2	115	0.429305
2	117	0.231528
2	121	0.261218
2	122	0.200445
2	131	0.215616
2	135	0.410324
2	144	0.251053
2	149	0.206387
2	158	0.216835
2	161	0.200727
2	163	0.242673
2	166	0.239647
2	172	0.241475
2	193	0.207976
2	198	0.225999
2	199	0.34278
2	204	0.221167
2	216	0.201968
2	220	0.246917
2	242	0.268597
2	244	0.261545
3	4	0.310848
3	5	0.383921
3	7	0.471599
3	8	0.246917
3	10	0.232311
3	11	0.311492
3	12	0.226782
3	14	0.290669
3	18	0.283312
3	19	0.314222
3	20	0.426127
3	21	0.406624
3	22	0.278676
3	23	0.488774
3	24	0.216465
3	26	0.389123
3	27	0.3078
3	28	0.382832
3	29	0.339842
3	30	0.346568
3	33	0.215072
3	35	0.361979
3	36	0.417725
3	40	0.358866
3	42	0.349245
3	43	0.268314
3	44	0.251467
3	46	0.214353
3	48	0.389819
3	49	0.227675
3	50	0.395588
3	51	0.219316
3	52	0.201337
3	58	0.488142
3	60	0.292454
3	61	0.217597
3	65	0.209586
3	66	0.406363
3	67	0.294121
3	70	0.270787
3	71	0.30595
3	72	0.299529
3	73	0.229438
3	74	0.266116
3	75	0.410738
3	78	0.279176
3	80	0.419575
3	81	0.427303
3	82	0.344826
3	83	0.414656
3	89	0.346807
3	91	0.449723
3	92	0.370817
3	93	0.369794
3	97	0.218772
3	100	0.26838
3	101	0.443084
3	103	0.42628
3	104	0.214049
3	105	0.394216
3	108	0.230352
3	109	0.347809
3	110	0.241497
3	111	0.233064
3	112	0.354426
3	113	0.342301
3	114	0.545325
3	115	0.279895
3	116	0.245863
3	118	0.343871
3	119	0.304318
3	120	0.333411
3	121	0.29178
3	123	0.323146
3	124	0.390211
3	125	0.28686
3	126	0.453881
3	127	0.290234
3	128	0.268445
3	129	0.267661
3	131	0.212198
3	133	0.325802
3	134	0.356363
3	136	0.377303
3	138	0.349093
3	139	0.335706
3	140	0.283922
3	141	0.251423
3	142	0.220796
3	144	0.488491
3	145	0.372558
3	146	0.295306
3	147	0.55549
3	148	0.382985
3	150	0.344652
3	151	0.263112
3	153	0.254688
3	154	0.446784
3	155	0.29979
3	156	0.337817
3	157	0.526736
3	159	0.32332
3	161	0.288384
3	163	0.425496
3	164	0.282507
3	165	0.365092
3	166	0.203078
3	168	0.324735
3	170	0.403054
3	171	0.256495
3	172	0.239669
3	173	0.29609
3	174	0.230069
3	175	0.424887
3	176	0.381156
3	177	0.403424
3	179	0.377673
3	181	0.417007
3	188	0.538991
3	189	0.306821
3	190	0.268532
3	193	0.284161
3	194	0.257866
3	195	0.438078
3	196	0.206387
3	197	0.439841
3	200	0.400268
3	201	0.40076
3	202	0.388492
3	204	0.216791
3	206	0.280809
3	207	0.430764
3	209	0.422079
3	213	0.274779
3	215	0.322167
3	216	0.475583
3	220	0.238167
3	226	0.49058
3	227	0.287644
3	228	0.215202
3	230	0.355906
3	231	0.471904
3	233	0.399005
3	235	0.315484
3	236	0.278262
3	237	0.378718
3	238	0.255385
3	239	0.254841
3	240	0.301705
3	243	0.219403
4	5	0.645041
4	7	0.567027
4	8	0.349659
4	10	0.496893
4	11	0.363178
4	13	0.319337
4	14	0.268532
4	16	0.360521
4	17	0.22663
4	18	0.764413
4	19	0.548982
4	20	0.413393
4	21	0.588076
4	22	0.368009
4	23	0.450855
4	24	0.305841
4	25	0.274801
4	26	0.315571
4	27	0.6204
4	28	0.628715
4	29	0.452836
4	30	0.304753
4	34	0.294871
4	35	0.60451
4	36	0.707252
4	37	0.357998
4	39	0.312284
4	40	0.377151
4	41	0.469575
4	43	0.365527
4	47	0.266334
4	48	0.693212
4	50	0.65144
4	51	0.315092
4	52	0.32689
4	55	0.200836
4	58	0.669181
4	60	0.531677
4	64	0.238297
4	66	0.264222
4	67	0.322038
4	70	0.553132
4	71	0.51644
4	72	0.336685
4	73	0.385705
4	74	0.268663
4	75	0.50634
4	77	0.371578
4	78	0.628215
4	80	0.345588
4	81	0.704988
4	82	0.495913
4	83	0.484529
4	85	0.241671
4	86	0.207453
4	87	0.428304
4	88	0.312787
4	91	0.452009
4	92	0.547415
4	93	0.233661
4	94	0.207235
4	100	0.422971
4	101	0.398418
4	102	0.283552
4	103	0.364047
4	104	0.239603
4	105	0.763564
4	108	0.342497
4	109	0.294892
4	110	0.512696
4	111	0.299998
4	112	0.260718
4	113	0.521925
4	114	0.575799
4	116	0.543478
4	118	0.541508
4	120	0.347571
4	121	0.674296
4	122	0.373278
4	123	0.393585
4	124	0.341365
4	125	0.314548
4	126	0.36753
4	127	0.237274
4	128	0.360368
4	129	0.461477
4	131	0.560736
4	133	0.46779
4	134	0.461651
4	135	0.225411
4	136	0.328153
4	137	0.420424
4	138	0.638794
4	139	0.350225
4	140	0.322254
4	141	0.271188
4	144	0.530088
4	147	0.421208
4	148	0.609734
4	150	0.321035
4	151	0.379066
4	153	0.533636
4	154	0.676037
4	155	0.290887
4	156	0.294979
4	157	0.694823
4	158	0.211088
4	160	0.281505
4	161	0.477324
4	162	0.230243
4	163	0.586378
4	164	0.455665
4	165	0.224432
4	168	0.270556
4	169	0.35201
4	170	0.465635
4	171	0.667374
4	172	0.648241
4	173	0.41803
4	174	0.316638
4	175	0.513349
4	176	0.55512
4	177	0.317835
4	178	0.409475
4	181	0.540906
4	182	0.333507
4	187	0.284792
4	188	0.552095
4	192	0.473885
4	193	0.276455
4	195	0.581241
4	196	0.495478
4	197	0.49637
4	199	0.230635
4	200	0.689033
4	201	0.592128
4	202	0.690252
4	204	0.395152
4	205	0.43725
4	207	0.616482
4	209	0.480001
4	213	0.548634
4	215	0.515068
4	216	0.43836
4	217	0.229656
4	219	0.349223
4	220	0.519748
4	221	0.295611
4	224	0.237101
4	225	0.244697
4	226	0.440885
4	230	0.440363
4	231	0.362872
4	232	0.368662
4	233	0.743015
4	234	0.480461
4	237	0.310848
4	238	0.426824
4	239	0.600984
4	240	0.502574
4	241	0.276499
5	7	0.557297
5	8	0.497546
5	10	0.477629
5	11	0.516214
5	14	0.333965
5	16	0.326629
5	17	0.201859
5	18	0.635224
5	19	0.622664
5	20	0.48738
5	21	0.5263
5	22	0.321775
5	23	0.433202
5	24	0.440668
5	26	0.446066
5	27	0.586117
5	28	0.501464
5	29	0.519117
5	30	0.262568
5	35	0.565982
5	36	0.723055
5	37	0.448017
5	40	0.473493
5	41	0.316747
5	42	0.288427
5	43	0.523623
5	44	0.530828
5	48	0.587336
5	50	0.585703
5	51	0.272777
5	52	0.302794
5	58	0.619225
5	60	0.479392
5	61	0.32824
5	63	0.255125
5	65	0.283856
5	66	0.27713
5	67	0.318185
5	70	0.565071
5	71	0.527389
5	72	0.335358
5	73	0.371056
5	74	0.337534
5	75	0.668441
5	77	0.246895
5	78	0.616439
5	80	0.542038
5	81	0.606143
5	82	0.618028
5	83	0.545869
5	87	0.258367
5	88	0.223867
5	90	0.260957
5	91	0.526104
5	92	0.523384
5	93	0.292193
5	100	0.359933
5	101	0.426258
5	103	0.537315
5	104	0.255733
5	105	0.658471
5	108	0.220513
5	109	0.398505
5	110	0.407037
5	112	0.336794
5	113	0.532373
5	114	0.635115
5	116	0.459412
5	118	0.491747
5	119	0.298832
5	120	0.317586
5	121	0.562695
5	122	0.424486
5	123	0.328588
5	124	0.466571
5	125	0.386554
5	126	0.402118
5	127	0.526997
5	128	0.461782
5	129	0.548982
5	131	0.433485
5	133	0.383942
5	134	0.51792
5	135	0.237579
5	136	0.39032
5	137	0.427847
5	138	0.562369
5	139	0.436162
5	140	0.409366
5	141	0.406123
5	144	0.579543
5	145	0.295524
5	146	0.295393
5	147	0.484398
5	148	0.547893
5	150	0.418313
5	151	0.517354
5	152	0.333399
5	153	0.528499
5	154	0.637988
5	156	0.619638
5	157	0.717025
5	159	0.247222
5	160	0.222233
5	161	0.535356
5	162	0.326651
5	163	0.704574
5	164	0.301531
5	165	0.404055
5	166	0.238123
5	168	0.204972
5	170	0.494542
5	171	0.56041
5	172	0.591537
5	173	0.404665
5	174	0.241192
5	175	0.648241
5	176	0.455208
5	177	0.384922
5	178	0.22663
5	179	0.440603
5	181	0.563697
5	184	0.421883
5	188	0.479392
5	190	0.304165
5	192	0.264701
5	193	0.25545
5	195	0.440907
5	196	0.419902
5	197	0.483484
5	199	0.38601
5	200	0.588424
5	201	0.544337
5	202	0.51065
5	204	0.329415
5	207	0.700243
5	208	0.241954
5	209	0.479327
5	213	0.582308
5	215	0.549461
5	216	0.632742
5	220	0.452183
5	225	0.218772
5	226	0.541624
5	230	0.451443
5	231	0.550179
5	232	0.27417
5	233	0.655642
5	235	0.263591
5	236	0.400572
5	237	0.451922
5	239	0.565264
5	240	0.414112
5	241	0.235032
5	242	0.279612
5	243	0.368488
6	9	0.23229
6	12	0.272777
6	13	0.214223
6	17	0.312154
6	23	0.281375
6	24	0.210087
6	29	0.213134
6	38	0.255668
6	39	0.293782
6	42	0.209782
6	54	0.251292
6	55	0.362828
6	62	0.273038
6	64	0.432549
6	65	0.423123
6	74	0.300987
6	77	0.247048
6	86	0.223626
6	97	0.206365
6	98	0.336446
6	102	0.286969
6	107	0.23464
6	108	0.282507
6	115	0.307126
6	118	0.275739
6	127	0.206691
6	133	0.251053
6	135	0.205298
6	136	0.211001
6	141	0.309237
6	142	0.330547
6	155	0.323059
6	164	0.223409
6	166	0.271971
6	168	0.201728
6	183	0.501856
6	184	0.261958
6	185	0.494651
6	193	0.377782
6	194	0.378609
6	205	0.203165
6	208	0.281658
6	220	0.211545
6	223	0.23488
6	227	0.212046
6	232	0.495652
6	235	0.239756
7	8	0.316007
7	9	0.305428
7	10	0.441996
7	11	0.434227
7	14	0.293412
7	16	0.301618
7	18	0.582308
7	19	0.549896
7	20	0.526474
7	21	0.556666
7	22	0.420468
7	23	0.482047
7	24	0.38995
7	26	0.505208
7	27	0.574972
7	28	0.460824
7	29	0.559125
7	30	0.333268
7	35	0.418226
7	36	0.711845
7	37	0.522537
7	40	0.406319
7	41	0.218968
7	42	0.331592
7	43	0.395457
7	44	0.38588
7	48	0.658079
7	50	0.521751
7	51	0.29117
7	52	0.251597
7	58	0.565329
7	60	0.350421
7	61	0.250313
7	65	0.314701
7	66	0.361478
7	67	0.420296
7	69	0.249878
7	70	0.597983
7	71	0.625973
7	72	0.361761
7	73	0.465722
7	74	0.435857
7	75	0.464046
7	78	0.589295
7	80	0.481177
7	81	0.590122
7	82	0.54317
7	83	0.468486
7	85	0.278327
7	88	0.220634
7	89	0.251184
7	90	0.207061
7	91	0.414678
7	92	0.534463
7	93	0.455796
7	97	0.217466
7	100	0.339406
7	101	0.498678
7	103	0.341148
7	104	0.362219
7	105	0.626865
7	109	0.286468
7	110	0.348375
7	111	0.314006
7	112	0.39833
7	113	0.484464
7	114	0.593365
7	116	0.433269
7	118	0.428252
7	119	0.305428
7	120	0.266487
7	121	0.485487
7	122	0.254875
7	123	0.293739
7	124	0.496131
7	125	0.284553
7	126	0.503401
7	127	0.497524
7	128	0.537032
7	129	0.477803
7	131	0.47149
7	133	0.551899
7	134	0.535399
7	135	0.281201
7	136	0.479631
7	137	0.339232
7	138	0.588707
7	139	0.287339
7	140	0.35867
7	141	0.487859
7	143	0.254841
7	144	0.612847
7	145	0.375497
7	146	0.355101
7	147	0.561237
7	148	0.511564
7	149	0.288536
7	150	0.515417
7	151	0.421295
7	152	0.262024
7	153	0.559822
7	154	0.56707
7	156	0.453663
7	157	0.709711
7	159	0.298223
7	161	0.51755
7	162	0.350072
7	163	0.618006
7	164	0.257278
7	165	0.445565
7	169	0.272624
7	170	0.4216
7	171	0.517789
7	172	0.487794
7	173	0.399484
7	174	0.344456
7	175	0.671575
7	176	0.512282
7	177	0.444259
7	178	0.333878
7	179	0.38133
7	181	0.436097
7	182	0.213526
7	183	0.342933
7	184	0.305449
7	185	0.243783
7	188	0.557079
7	189	0.306146
7	190	0.350159
7	192	0.337077
7	193	0.490167
7	195	0.47136
7	196	0.354818
7	197	0.468748
7	199	0.356907
7	200	0.512152
7	201	0.590876
7	202	0.510018
7	204	0.38749
7	205	0.258301
7	207	0.717526
7	208	0.307953
7	209	0.424669
7	213	0.628258
7	215	0.49341
7	216	0.504185
7	220	0.398722
7	225	0.354491
7	226	0.536901
7	227	0.334792
7	230	0.524015
7	231	0.559452
7	233	0.608036
7	235	0.276216
7	236	0.219817
7	237	0.523971
7	238	0.367726
7	239	0.5428
7	240	0.548525
7	242	0.335379
7	243	0.231985
8	9	0.263613
8	10	0.282811
8	11	0.50188
8	13	0.200683
8	16	0.219556
8	18	0.318684
8	19	0.445435
8	20	0.325105
8	21	0.3078
8	22	0.255298
8	23	0.365114
8	24	0.375518
8	26	0.308889
8	27	0.306668
8	28	0.372101
8	29	0.291235
8	30	0.261588
8	35	0.355645
8	36	0.522295
8	37	0.336252
8	39	0.277239
8	40	0.510236
8	41	0.293129
8	43	0.316202
8	44	0.372776
8	50	0.491734
8	52	0.276586
8	57	0.233051
8	58	0.556666
8	60	0.362828
8	66	0.2031
8	67	0.291324
8	70	0.324966
8	71	0.283007
8	72	0.386663
8	73	0.468073
8	74	0.316072
8	75	0.234553
8	76	0.23858
8	78	0.446959
8	80	0.37689
8	81	0.478586
8	82	0.409258
8	83	0.322428
8	85	0.212307
8	88	0.335055
8	89	0.217967
8	91	0.287383
8	92	0.313177
8	93	0.299398
8	95	0.2137
8	100	0.211415
8	101	0.334966
8	103	0.520576
8	104	0.285794
8	105	0.393019
8	108	0.286142
8	109	0.493345
8	110	0.311087
8	112	0.345305
8	114	0.483789
8	116	0.366846
8	118	0.519849
8	119	0.43331
8	120	0.254537
8	121	0.21875
8	123	0.234249
8	124	0.433441
8	128	0.377086
8	129	0.370751
8	131	0.303947
8	133	0.400594
8	134	0.409236
8	136	0.403511
8	137	0.275998
8	138	0.472013
8	140	0.378
8	144	0.337447
8	145	0.254187
8	146	0.26124
8	147	0.220165
8	148	0.412087
8	150	0.439188
8	151	0.341648
8	152	0.209369
8	153	0.444608
8	154	0.551333
8	156	0.268837
8	157	0.542125
8	160	0.213853
8	161	0.354774
8	162	0.235533
8	163	0.361805
8	164	0.425779
8	165	0.367747
8	167	0.242934
8	168	0.25915
8	169	0.232573
8	170	0.642646
8	171	0.429305
8	172	0.271993
8	173	0.270818
8	174	0.279808
8	175	0.356515
8	176	0.303251
8	177	0.295632
8	178	0.223387
8	179	0.281266
8	181	0.408605
8	187	0.208215
8	188	0.311893
8	190	0.297243
8	195	0.349659
8	197	0.236687
8	200	0.312546
8	201	0.432834
8	202	0.349572
8	204	0.225651
8	207	0.434312
8	209	0.389907
8	213	0.398592
8	215	0.394478
8	216	0.413437
8	220	0.452553
8	226	0.528281
8	228	0.225106
8	229	0.274868
8	230	0.239103
8	231	0.518138
8	232	0.208759
8	233	0.390951
8	235	0.243086
8	236	0.267204
8	237	0.482135
8	238	0.20606
8	239	0.353577
8	240	0.310173
8	241	0.20939
8	242	0.248006
8	243	0.25471
9	20	0.237949
9	29	0.315245
9	34	0.219882
9	38	0.284662
9	40	0.264832
9	42	0.304165
9	44	0.253186
9	61	0.3041
9	64	0.242651
9	65	0.427499
9	71	0.210261
9	73	0.290299
9	74	0.36322
9	77	0.241671
9	80	0.202882
9	86	0.215551
9	90	0.309455
9	97	0.265267
9	98	0.228284
9	103	0.207671
9	106	0.407669
9	112	0.389667
9	124	0.237492
9	126	0.267248
9	127	0.239886
9	132	0.28649
9	141	0.229416
9	142	0.247331
9	145	0.215703
9	146	0.288449
9	149	0.221798
9	150	0.267291
9	151	0.317313
9	156	0.276564
9	158	0.32676
9	159	0.215311
9	166	0.29696
9	175	0.278066
9	177	0.29622
9	179	0.229656
9	183	0.257518
9	184	0.329393
9	185	0.273212
9	189	0.266377
9	190	0.296786
9	191	0.416397
9	192	0.216051
9	194	0.307996
9	199	0.239386
9	202	0.205646
9	207	0.22774
9	208	0.363133
9	216	0.245241
9	224	0.264594
9	226	0.236687
9	229	0.329428
9	231	0.421012
9	234	0.283705
9	235	0.477977
9	236	0.369358
9	237	0.3312
9	242	0.31703
10	14	0.443019
10	18	0.405905
10	19	0.320861
10	21	0.253447
10	23	0.23353
10	24	0.427237
10	26	0.253099
10	27	0.460672
10	28	0.408104
10	29	0.261197
10	32	0.293238
10	33	0.234053
10	35	0.479065
10	36	0.379676
10	37	0.313298
10	40	0.217444
10	42	0.298157
10	43	0.243217
10	48	0.340495
10	50	0.308257
10	58	0.386489
10	60	0.208324
10	63	0.204722
10	70	0.252948
10	71	0.203753
10	72	0.413763
10	73	0.301357
10	74	0.279742
10	75	0.358736
10	77	0.200183
10	78	0.288036
10	80	0.285489
10	81	0.425365
10	82	0.314156
10	83	0.215442
10	91	0.268293
10	92	0.217488
10	101	0.442845
10	103	0.29474
10	105	0.398505
10	109	0.23919
10	110	0.248724
10	112	0.268031
10	114	0.204493
10	116	0.359532
10	117	0.250073
10	119	0.210675
10	120	0.261165
10	121	0.504664
10	124	0.220644
10	125	0.385792
10	126	0.265441
10	127	0.287513
10	128	0.369053
10	129	0.200183
10	131	0.242934
10	133	0.310565
10	134	0.283486
10	136	0.226978
10	137	0.235729
10	138	0.41705
10	139	0.256625
10	141	0.355536
10	144	0.344587
10	145	0.292716
10	146	0.201054
10	147	0.284945
10	148	0.247897
10	150	0.254971
10	153	0.444847
10	154	0.446959
10	156	0.307626
10	157	0.414003
10	162	0.32184
10	163	0.32763
10	165	0.335554
10	170	0.245894
10	171	0.41742
10	172	0.474277
10	173	0.248201
10	174	0.375257
10	175	0.276477
10	176	0.364069
10	181	0.297853
10	188	0.387316
10	189	0.206038
10	195	0.40436
10	196	0.432527
10	197	0.391822
10	200	0.322624
10	201	0.335262
10	202	0.390843
10	204	0.206321
10	207	0.328262
10	209	0.33218
10	213	0.267857
10	215	0.277674
10	216	0.358997
10	217	0.262133
10	220	0.219795
10	224	0.251033
10	225	0.272102
10	226	0.234466
10	230	0.307365
10	231	0.220666
10	233	0.438165
10	237	0.214114
10	239	0.493236
10	240	0.405971
10	243	0.227174
11	18	0.350531
11	19	0.42416
11	20	0.507289
11	21	0.343816
11	22	0.252937
11	23	0.403959
11	24	0.349334
11	26	0.333422
11	27	0.332486
11	28	0.329297
11	29	0.370612
11	30	0.24595
11	35	0.232367
11	36	0.589766
11	37	0.364312
11	40	0.496787
11	41	0.231866
11	42	0.333194
11	43	0.474856
11	44	0.474845
11	48	0.331692
11	50	0.31554
11	51	0.293686
11	52	0.311426
11	56	0.25408
11	58	0.43106
11	60	0.437035
11	61	0.283107
11	62	0.226501
11	65	0.258738
11	66	0.288222
11	67	0.233021
11	70	0.255736
11	71	0.472647
11	72	0.31135
11	73	0.508998
11	74	0.304635
11	75	0.451075
11	78	0.418021
11	80	0.468826
11	81	0.442455
11	82	0.609868
11	83	0.510522
11	86	0.23831
11	87	0.226207
11	88	0.376393
11	90	0.268468
11	91	0.314866
11	92	0.404362
11	93	0.499464
11	100	0.225391
11	101	0.353046
11	103	0.603948
11	104	0.272147
11	105	0.38943
11	109	0.317913
11	110	0.271222
11	111	0.214508
11	112	0.272571
11	113	0.380614
11	114	0.497483
11	116	0.324282
11	118	0.449184
11	119	0.210741
11	121	0.25654
11	124	0.444958
11	125	0.266259
11	126	0.284924
11	127	0.363527
11	128	0.352251
11	129	0.400858
11	131	0.333226
11	133	0.332203
11	134	0.412917
11	135	0.201555
11	136	0.487938
11	137	0.281844
11	138	0.465463
11	140	0.323768
11	143	0.237765
11	144	0.478785
11	145	0.325314
11	146	0.339898
11	147	0.361589
11	148	0.369306
11	149	0.312068
11	150	0.407246
11	151	0.380875
11	152	0.321613
11	153	0.398496
11	154	0.419403
11	156	0.413711
11	157	0.575008
11	159	0.244981
11	161	0.280484
11	163	0.482649
11	164	0.210436
11	165	0.213125
11	166	0.391149
11	169	0.216564
11	170	0.436654
11	171	0.33561
11	172	0.28906
11	173	0.275869
11	174	0.285632
11	175	0.481397
11	176	0.438755
11	177	0.393489
11	179	0.343566
11	181	0.384957
11	183	0.23166
11	184	0.206997
11	187	0.354417
11	188	0.387373
11	189	0.227132
11	190	0.483563
11	191	0.255952
11	195	0.298529
11	197	0.277817
11	199	0.296701
11	200	0.314909
11	201	0.403962
11	202	0.30494
11	207	0.484608
11	208	0.216357
11	209	0.321864
11	213	0.486882
11	215	0.474159
11	216	0.476347
11	219	0.22009
11	220	0.285349
11	226	0.543238
11	227	0.26147
11	230	0.370296
11	231	0.460566
11	233	0.339582
11	235	0.357051
11	236	0.401826
11	237	0.394937
11	238	0.222408
11	239	0.273333
11	242	0.264376
11	243	0.230615
12	17	0.231136
12	23	0.237753
12	38	0.285532
12	50	0.214527
12	61	0.230788
12	64	0.242128
12	68	0.20902
12	78	0.239473
12	87	0.324191
12	89	0.222712
12	98	0.216182
12	103	0.208433
12	104	0.274583
12	114	0.258759
12	115	0.22158
12	133	0.227675
12	134	0.279024
12	135	0.230853
12	145	0.222734
12	148	0.223517
12	154	0.238776
12	160	0.201032
12	174	0.203905
12	176	0.217292
12	182	0.2674
12	185	0.485966
12	188	0.211132
12	190	0.236861
12	194	0.261937
12	210	0.255537
12	214	0.228959
12	226	0.214136
12	228	0.249072
12	231	0.262394
12	232	0.345088
12	243	0.202817
13	15	0.318771
13	28	0.229852
13	34	0.324452
13	39	0.354535
13	41	0.280374
13	42	0.28932
13	45	0.283116
13	46	0.250726
13	50	0.278023
13	54	0.212808
13	56	0.284596
13	58	0.25754
13	59	0.402749
13	64	0.232115
13	65	0.350529
13	79	0.208346
13	85	0.316028
13	88	0.22428
13	90	0.347003
13	94	0.378087
13	95	0.54071
13	96	0.277914
13	99	0.238189
13	105	0.223757
13	108	0.423319
13	118	0.387819
13	120	0.33069
13	127	0.311174
13	133	0.258715
13	146	0.45116
13	154	0.211676
13	155	0.51139
13	156	0.205929
13	159	0.226064
13	162	0.23451
13	164	0.364178
13	168	0.382136
13	169	0.439536
13	170	0.270644
13	176	0.216029
13	179	0.208629
13	180	0.291627
13	182	0.334204
13	183	0.2036
13	184	0.281875
13	185	0.261806
13	187	0.331766
13	189	0.370142
13	191	0.261349
13	192	0.365941
13	194	0.244806
13	200	0.227435
13	202	0.349071
13	203	0.33649
13	205	0.472165
13	208	0.2339
13	210	0.216965
13	214	0.468073
13	221	0.404164
13	224	0.334837
13	234	0.397016
13	235	0.429806
13	236	0.233117
13	238	0.296264
13	241	0.336424
13	243	0.226761
14	17	0.231941
14	18	0.247157
14	19	0.365788
14	21	0.302903
14	22	0.200553
14	24	0.280025
14	25	0.221732
14	27	0.245241
14	28	0.35164
14	31	0.396667
14	32	0.44513
14	33	0.423363
14	35	0.210065
14	37	0.206246
14	41	0.28858
14	42	0.208389
14	43	0.200923
14	48	0.243108
14	50	0.225977
14	53	0.297526
14	58	0.294827
14	70	0.321069
14	72	0.394347
14	75	0.327979
14	76	0.226478
14	81	0.32652
14	82	0.229982
14	86	0.30127
14	88	0.258063
14	92	0.247004
14	101	0.230962
14	104	0.286512
14	105	0.329263
14	107	0.326063
14	109	0.203491
14	111	0.213745
14	112	0.215268
14	115	0.314418
14	116	0.268512
14	117	0.46681
14	121	0.390124
14	122	0.349225
14	125	0.230505
14	126	0.333682
14	127	0.343085
14	128	0.243217
14	129	0.20323
14	135	0.219186
14	137	0.269642
14	138	0.343107
14	139	0.259869
14	141	0.35127
14	144	0.288123
14	145	0.200509
14	146	0.28834
14	154	0.276412
14	157	0.30854
14	159	0.247418
14	161	0.256408
14	162	0.23094
14	163	0.227523
14	165	0.338666
14	171	0.302707
14	172	0.315027
14	173	0.28784
14	174	0.326977
14	184	0.332114
14	185	0.273735
14	195	0.309041
14	196	0.313677
14	197	0.308344
14	199	0.283987
14	200	0.344739
14	201	0.291825
14	202	0.357996
14	204	0.249355
14	209	0.215028
14	211	0.444891
14	213	0.272907
14	216	0.213744
14	217	0.235359
14	225	0.262633
14	230	0.290299
14	233	0.323473
14	240	0.286621
14	243	0.258541
15	17	0.24461
15	19	0.271275
15	34	0.27824
15	38	0.369336
15	41	0.269555
15	45	0.287165
15	46	0.586813
15	49	0.216661
15	56	0.507232
15	59	0.687574
15	66	0.215463
15	68	0.208824
15	77	0.399898
15	78	0.244175
15	79	0.206626
15	85	0.656665
15	86	0.205472
15	90	0.283682
15	95	0.509409
15	96	0.625777
15	97	0.450615
15	98	0.312633
15	99	0.431852
15	104	0.421839
15	106	0.294871
15	108	0.407603
15	109	0.258955
15	117	0.209042
15	118	0.290638
15	120	0.482213
15	125	0.245219
15	127	0.238885
15	141	0.267204
15	155	0.628541
15	160	0.419619
15	164	0.350878
15	166	0.36642
15	168	0.623992
15	169	0.655446
15	176	0.271884
15	180	0.607732
15	184	0.225934
15	188	0.27676
15	190	0.219469
15	192	0.496784
15	198	0.21653
15	202	0.390255
15	203	0.634767
15	205	0.536618
15	206	0.203274
15	209	0.202599
15	210	0.870702
15	212	0.352314
15	214	0.399832
15	220	0.39106
15	221	0.492888
15	229	0.366618
15	238	0.455056
16	18	0.38736
16	19	0.204993
16	20	0.333812
16	21	0.349702
16	22	0.42382
16	23	0.352815
16	25	0.212111
16	27	0.34598
16	28	0.297461
16	30	0.327609
16	35	0.222015
16	36	0.379654
16	38	0.278959
16	40	0.23525
16	41	0.217706
16	48	0.252033
16	50	0.325649
16	52	0.217553
16	57	0.328349
16	58	0.328305
16	63	0.275075
16	64	0.203731
16	66	0.282746
16	67	0.251631
16	68	0.253208
16	69	0.239973
16	70	0.473528
16	72	0.206952
16	73	0.252098
16	77	0.261458
16	78	0.325192
16	81	0.275672
16	82	0.261458
16	89	0.270208
16	92	0.359236
16	99	0.338296
16	102	0.329306
16	104	0.288101
16	105	0.331701
16	110	0.204253
16	114	0.436227
16	118	0.279287
16	121	0.304405
16	122	0.265595
16	123	0.325345
16	124	0.354295
16	125	0.248898
16	126	0.263743
16	131	0.238406
16	134	0.406276
16	137	0.385205
16	138	0.374169
16	140	0.313612
16	142	0.24326
16	144	0.346568
16	145	0.203013
16	147	0.246264
16	148	0.376955
16	153	0.358888
16	154	0.337099
16	157	0.343782
16	159	0.213657
16	160	0.467485
16	161	0.278414
16	162	0.376411
16	164	0.646521
16	165	0.298832
16	169	0.304927
16	170	0.233204
16	171	0.288993
16	173	0.276347
16	174	0.368117
16	176	0.458669
16	177	0.208716
16	178	0.680152
16	182	0.552726
16	186	0.202926
16	187	0.478151
16	188	0.322471
16	189	0.271558
16	192	0.39833
16	195	0.371404
16	197	0.290757
16	201	0.20013
16	202	0.372471
16	204	0.237514
16	207	0.304448
16	209	0.271079
16	213	0.383833
16	220	0.289559
16	222	0.283464
16	225	0.281048
16	226	0.270056
16	233	0.291693
16	234	0.308455
16	238	0.526279
16	239	0.320926
16	240	0.210261
16	243	0.224606
17	18	0.227022
17	30	0.255428
17	31	0.209947
17	32	0.567854
17	33	0.510933
17	34	0.57495
17	39	0.262416
17	47	0.387947
17	50	0.290495
17	55	0.409432
17	57	0.269642
17	62	0.208193
17	64	0.428217
17	68	0.27922
17	72	0.280178
17	78	0.260239
17	79	0.551877
17	86	0.303882
17	87	0.282528
17	89	0.215746
17	98	0.202316
17	100	0.215572
17	107	0.320338
17	114	0.208454
17	115	0.528042
17	117	0.752245
17	118	0.304352
17	120	0.294208
17	133	0.228502
17	136	0.2738
17	140	0.238276
17	142	0.201902
17	145	0.364504
17	146	0.25249
17	148	0.276651
17	159	0.270927
17	164	0.279612
17	166	0.206212
17	168	0.202077
17	174	0.275672
17	180	0.289864
17	181	0.239342
17	183	0.23414
17	185	0.329524
17	192	0.334944
17	194	0.295241
17	196	0.315049
17	200	0.262133
17	202	0.242738
17	206	0.347591
17	211	0.431569
17	219	0.203121
17	220	0.21801
17	223	0.233356
17	225	0.222168
17	228	0.23229
17	232	0.285663
17	237	0.24781
17	242	0.268293
18	19	0.571293
18	20	0.495391
18	21	0.670247
18	22	0.441321
18	23	0.508669
18	26	0.395131
18	27	0.729759
18	28	0.561955
18	29	0.500876
18	30	0.412849
18	34	0.308149
18	35	0.572273
18	36	0.685027
18	37	0.365464
18	40	0.362414
18	41	0.4524
18	43	0.340212
18	44	0.265419
18	47	0.289015
18	48	0.716873
18	50	0.548394
18	51	0.433267
18	52	0.31827
18	58	0.614588
18	60	0.52506
18	63	0.290127
18	66	0.348962
18	70	0.653555
18	71	0.589578
18	72	0.321057
18	73	0.291235
18	75	0.520619
18	77	0.295611
18	78	0.683199
18	80	0.460868
18	81	0.685963
18	82	0.513958
18	83	0.484855
18	85	0.243565
18	87	0.32332
18	88	0.355451
18	91	0.390081
18	92	0.628367
18	93	0.313438
18	99	0.241562
18	100	0.424995
18	101	0.344413
18	102	0.257823
18	103	0.374016
18	104	0.39759
18	105	0.783873
18	109	0.252686
18	110	0.441038
18	111	0.353786
18	112	0.237274
18	113	0.620139
18	114	0.536553
18	116	0.538504
18	118	0.535293
18	120	0.399127
18	121	0.626299
18	122	0.28462
18	123	0.428696
18	124	0.351944
18	125	0.347156
18	126	0.386489
18	127	0.286251
18	128	0.240322
18	129	0.485508
18	131	0.580414
18	133	0.412675
18	134	0.479087
18	135	0.216487
18	136	0.360412
18	137	0.453881
18	138	0.587575
18	139	0.367508
18	140	0.341365
18	141	0.401574
18	143	0.207954
18	144	0.604532
18	145	0.207714
18	147	0.425779
18	148	0.596043
18	150	0.37911
18	151	0.361326
18	152	0.250073
18	153	0.455796
18	154	0.608537
18	155	0.200836
18	156	0.389602
18	157	0.641841
18	158	0.275193
18	159	0.220383
18	160	0.404621
18	161	0.617941
18	162	0.294783
18	163	0.670073
18	164	0.347765
18	165	0.339428
18	168	0.228567
18	169	0.309302
18	170	0.391909
18	171	0.57556
18	172	0.625341
18	173	0.372623
18	174	0.204036
18	175	0.571685
18	176	0.464655
18	177	0.315658
18	178	0.365962
18	179	0.287339
18	181	0.530088
18	182	0.243674
18	184	0.342563
18	187	0.225607
18	188	0.577736
18	192	0.48627
18	193	0.494825
18	195	0.579739
18	196	0.600331
18	197	0.593561
18	199	0.220927
18	200	0.609691
18	201	0.619947
18	202	0.668223
18	204	0.400181
18	205	0.438665
18	207	0.686464
18	209	0.5194
18	213	0.577976
18	215	0.546805
18	216	0.543366
18	219	0.350247
18	220	0.457625
18	221	0.217836
18	225	0.228263
18	226	0.378217
18	227	0.297613
18	230	0.499331
18	231	0.331244
18	232	0.221928
18	233	0.753986
18	234	0.380168
18	237	0.237775
18	238	0.350181
18	239	0.559387
18	240	0.437925
18	241	0.253883
19	20	0.554946
19	21	0.503619
19	22	0.487772
19	23	0.492452
19	24	0.327456
19	26	0.495608
19	27	0.505817
19	28	0.587619
19	29	0.424625
19	30	0.258955
19	34	0.200205
19	35	0.475561
19	36	0.672729
19	37	0.321755
19	40	0.46755
19	41	0.390407
19	43	0.313264
19	44	0.477367
19	46	0.345131
19	48	0.484137
19	50	0.495913
19	51	0.280178
19	57	0.213744
19	58	0.576648
19	60	0.49772
19	61	0.243696
19	65	0.272733
19	66	0.296503
19	70	0.530102
19	71	0.511324
19	72	0.407299
19	73	0.481677
19	75	0.526605
19	78	0.65673
19	80	0.463001
19	81	0.566766
19	82	0.431351
19	83	0.492496
19	84	0.297722
19	85	0.380612
19	86	0.321906
19	87	0.247265
19	91	0.389079
19	92	0.539753
19	93	0.249116
19	96	0.278044
19	97	0.206452
19	100	0.410019
19	101	0.317378
19	102	0.274388
19	103	0.454359
19	104	0.492343
19	105	0.594911
19	108	0.274213
19	109	0.507058
19	110	0.422927
19	111	0.311013
19	112	0.317443
19	113	0.352772
19	114	0.516179
19	116	0.350357
19	118	0.457377
19	120	0.353035
19	121	0.465287
19	122	0.260099
19	123	0.257257
19	124	0.452596
19	125	0.446131
19	126	0.336272
19	127	0.321797
19	128	0.437947
19	129	0.446501
19	131	0.449005
19	133	0.394195
19	134	0.444891
19	135	0.274605
19	136	0.413263
19	137	0.471251
19	138	0.48233
19	139	0.201859
19	140	0.425975
19	141	0.243282
19	144	0.516549
19	145	0.293673
19	146	0.411565
19	147	0.400812
19	148	0.455252
19	149	0.220165
19	150	0.448395
19	151	0.442257
19	152	0.317813
19	153	0.437359
19	154	0.592974
19	155	0.359759
19	156	0.39537
19	157	0.59145
19	159	0.419445
19	160	0.299398
19	161	0.470141
19	162	0.440624
19	163	0.694953
19	164	0.262764
19	165	0.371861
19	167	0.216944
19	168	0.428783
19	169	0.373494
19	170	0.475953
19	171	0.593975
19	172	0.507428
19	173	0.679107
[truncated: 11,431 more rows]

## Sheet: Location0.3
1	3	0.388122
1	4	0.803768
1	5	0.660931
1	7	0.579891
1	8	0.390603
1	10	0.472862
1	11	0.411382
1	14	0.369532
1	18	0.662847
1	19	0.620553
1	20	0.37554
1	21	0.587075
1	22	0.325171
1	23	0.377434
1	24	0.369402
1	26	0.326651
1	27	0.554924
1	28	0.584092
1	29	0.479131
1	34	0.311523
1	35	0.446414
1	36	0.724949
1	37	0.453448
1	40	0.343042
1	41	0.436118
1	43	0.399898
1	48	0.565525
1	50	0.623361
1	52	0.383202
1	58	0.666547
1	60	0.53714
1	67	0.401097
1	70	0.518021
1	71	0.490297
1	72	0.398135
1	73	0.407625
1	74	0.372863
1	75	0.667526
1	78	0.589904
1	80	0.441582
1	81	0.65525
1	82	0.493628
1	83	0.466701
1	86	0.309259
1	87	0.530131
1	88	0.330701
1	91	0.390494
1	92	0.544563
1	100	0.330743
1	101	0.461194
1	103	0.380264
1	104	0.371535
1	105	0.741231
1	109	0.390494
1	110	0.359519
1	112	0.371121
1	113	0.45129
1	114	0.604488
1	116	0.479852
1	118	0.581059
1	121	0.598502
1	124	0.322667
1	125	0.325889
1	127	0.332223
1	128	0.391234
1	129	0.527585
1	131	0.520097
1	133	0.438861
1	134	0.383137
1	135	0.315658
1	137	0.464873
1	138	0.544672
1	139	0.310782
1	144	0.519683
1	147	0.414939
1	148	0.581567
1	150	0.342062
1	151	0.449919
1	153	0.569443
1	154	0.646848
1	157	0.708144
1	161	0.43762
1	163	0.549504
1	164	0.368096
1	165	0.378283
1	170	0.581284
1	171	0.629107
1	172	0.585094
1	173	0.455644
1	175	0.492126
1	176	0.598589
1	177	0.356407
1	179	0.32837
1	181	0.52593
1	188	0.489035
1	192	0.397917
1	195	0.604858
1	196	0.429371
1	197	0.546348
1	199	0.386402
1	200	0.683482
1	201	0.604644
1	202	0.684135
1	204	0.39365
1	205	0.330743
1	207	0.58973
1	209	0.444521
1	213	0.599047
1	215	0.578106
1	216	0.514764
1	219	0.396241
1	220	0.536183
1	226	0.508342
1	230	0.384965
1	231	0.464851
1	233	0.662672
1	234	0.385272
1	237	0.336968
1	238	0.369315
1	239	0.561106
1	240	0.552203
1	241	0.314439
1	243	0.31137
2	44	0.308432
2	115	0.429305
2	135	0.410324
2	199	0.34278
3	4	0.310848
3	5	0.383921
3	7	0.471599
3	11	0.311492
3	19	0.314222
3	20	0.426127
3	21	0.406624
3	23	0.488774
3	26	0.389123
3	27	0.3078
3	28	0.382832
3	29	0.339842
3	30	0.346568
3	35	0.361979
3	36	0.417725
3	40	0.358866
3	42	0.349245
3	48	0.389819
3	50	0.395588
3	58	0.488142
3	66	0.406363
3	71	0.30595
3	75	0.410738
3	80	0.419575
3	81	0.427303
3	82	0.344826
3	83	0.414656
3	89	0.346807
3	91	0.449723
3	92	0.370817
3	93	0.369794
3	101	0.443084
3	103	0.42628
3	105	0.394216
3	109	0.347809
3	112	0.354426
3	113	0.342301
3	114	0.545325
3	118	0.343871
3	119	0.304318
3	120	0.333411
3	123	0.323146
3	124	0.390211
3	126	0.453881
3	133	0.325802
3	134	0.356363
3	136	0.377303
3	138	0.349093
3	139	0.335706
3	144	0.488491
3	145	0.372558
3	147	0.55549
3	148	0.382985
3	150	0.344652
3	154	0.446784
3	156	0.337817
3	157	0.526736
3	159	0.32332
3	163	0.425496
3	165	0.365092
3	168	0.324735
3	170	0.403054
3	175	0.424887
3	176	0.381156
3	177	0.403424
3	179	0.377673
3	181	0.417007
3	188	0.538991
3	189	0.306821
3	195	0.438078
3	197	0.439841
3	200	0.400268
3	201	0.40076
3	202	0.388492
3	207	0.430764
3	209	0.422079
3	215	0.322167
3	216	0.475583
3	226	0.49058
3	230	0.355906
3	231	0.471904
3	233	0.399005
3	235	0.315484
3	237	0.378718
3	240	0.301705
4	5	0.645041
4	7	0.567027
4	8	0.349659
4	10	0.496893
4	11	0.363178
4	13	0.319337
4	16	0.360521
4	18	0.764413
4	19	0.548982
4	20	0.413393
4	21	0.588076
4	22	0.368009
4	23	0.450855
4	24	0.305841
4	26	0.315571
4	27	0.6204
4	28	0.628715
4	29	0.452836
4	30	0.304753
4	35	0.60451
4	36	0.707252
4	37	0.357998
4	39	0.312284
4	40	0.377151
4	41	0.469575
4	43	0.365527
4	48	0.693212
4	50	0.65144
4	51	0.315092
4	52	0.32689
4	58	0.669181
4	60	0.531677
4	67	0.322038
4	70	0.553132
4	71	0.51644
4	72	0.336685
4	73	0.385705
4	75	0.50634
4	77	0.371578
4	78	0.628215
4	80	0.345588
4	81	0.704988
4	82	0.495913
4	83	0.484529
4	87	0.428304
4	88	0.312787
4	91	0.452009
4	92	0.547415
4	100	0.422971
4	101	0.398418
4	103	0.364047
4	105	0.763564
4	108	0.342497
4	110	0.512696
4	113	0.521925
4	114	0.575799
4	116	0.543478
4	118	0.541508
4	120	0.347571
4	121	0.674296
4	122	0.373278
4	123	0.393585
4	124	0.341365
4	125	0.314548
4	126	0.36753
4	128	0.360368
4	129	0.461477
4	131	0.560736
4	133	0.46779
4	134	0.461651
4	136	0.328153
4	137	0.420424
4	138	0.638794
4	139	0.350225
4	140	0.322254
4	144	0.530088
4	147	0.421208
4	148	0.609734
4	150	0.321035
4	151	0.379066
4	153	0.533636
4	154	0.676037
4	157	0.694823
4	161	0.477324
4	163	0.586378
4	164	0.455665
4	169	0.35201
4	170	0.465635
4	171	0.667374
4	172	0.648241
4	173	0.41803
4	174	0.316638
4	175	0.513349
4	176	0.55512
4	177	0.317835
4	178	0.409475
4	181	0.540906
4	182	0.333507
4	188	0.552095
4	192	0.473885
4	195	0.581241
4	196	0.495478
4	197	0.49637
4	200	0.689033
4	201	0.592128
4	202	0.690252
4	204	0.395152
4	205	0.43725
4	207	0.616482
4	209	0.480001
4	213	0.548634
4	215	0.515068
4	216	0.43836
4	219	0.349223
4	220	0.519748
4	226	0.440885
4	230	0.440363
4	231	0.362872
4	232	0.368662
4	233	0.743015
4	234	0.480461
4	237	0.310848
4	238	0.426824
4	239	0.600984
4	240	0.502574
5	7	0.557297
5	8	0.497546
5	10	0.477629
5	11	0.516214
5	14	0.333965
5	16	0.326629
5	18	0.635224
5	19	0.622664
5	20	0.48738
5	21	0.5263
5	22	0.321775
5	23	0.433202
5	24	0.440668
5	26	0.446066
5	27	0.586117
5	28	0.501464
5	29	0.519117
5	35	0.565982
5	36	0.723055
5	37	0.448017
5	40	0.473493
5	41	0.316747
5	43	0.523623
5	44	0.530828
5	48	0.587336
5	50	0.585703
5	52	0.302794
5	58	0.619225
5	60	0.479392
5	61	0.32824
5	67	0.318185
5	70	0.565071
5	71	0.527389
5	72	0.335358
5	73	0.371056
5	74	0.337534
5	75	0.668441
5	78	0.616439
5	80	0.542038
5	81	0.606143
5	82	0.618028
5	83	0.545869
5	91	0.526104
5	92	0.523384
5	100	0.359933
5	101	0.426258
5	103	0.537315
5	105	0.658471
5	109	0.398505
5	110	0.407037
5	112	0.336794
5	113	0.532373
5	114	0.635115
5	116	0.459412
5	118	0.491747
5	120	0.317586
5	121	0.562695
5	122	0.424486
5	123	0.328588
5	124	0.466571
5	125	0.386554
5	126	0.402118
5	127	0.526997
5	128	0.461782
5	129	0.548982
5	131	0.433485
5	133	0.383942
5	134	0.51792
5	136	0.39032
5	137	0.427847
5	138	0.562369
5	139	0.436162
5	140	0.409366
5	141	0.406123
5	144	0.579543
5	147	0.484398
5	148	0.547893
5	150	0.418313
5	151	0.517354
5	152	0.333399
5	153	0.528499
5	154	0.637988
5	156	0.619638
5	157	0.717025
5	161	0.535356
5	162	0.326651
5	163	0.704574
5	164	0.301531
5	165	0.404055
5	170	0.494542
5	171	0.56041
5	172	0.591537
5	173	0.404665
5	175	0.648241
5	176	0.455208
5	177	0.384922
5	179	0.440603
5	181	0.563697
5	184	0.421883
5	188	0.479392
5	190	0.304165
5	195	0.440907
5	196	0.419902
5	197	0.483484
5	199	0.38601
5	200	0.588424
5	201	0.544337
5	202	0.51065
5	204	0.329415
5	207	0.700243
5	209	0.479327
5	213	0.582308
5	215	0.549461
5	216	0.632742
5	220	0.452183
5	226	0.541624
5	230	0.451443
5	231	0.550179
5	233	0.655642
5	236	0.400572
5	237	0.451922
5	239	0.565264
5	240	0.414112
5	243	0.368488
6	17	0.312154
6	55	0.362828
6	64	0.432549
6	65	0.423123
6	74	0.300987
6	98	0.336446
6	115	0.307126
6	141	0.309237
6	142	0.330547
6	155	0.323059
6	183	0.501856
6	185	0.494651
6	193	0.377782
6	194	0.378609
6	232	0.495652
7	8	0.316007
7	9	0.305428
7	10	0.441996
7	11	0.434227
7	16	0.301618
7	18	0.582308
7	19	0.549896
7	20	0.526474
7	21	0.556666
7	22	0.420468
7	23	0.482047
7	24	0.38995
7	26	0.505208
7	27	0.574972
7	28	0.460824
7	29	0.559125
7	30	0.333268
7	35	0.418226
7	36	0.711845
7	37	0.522537
7	40	0.406319
7	42	0.331592
7	43	0.395457
7	44	0.38588
7	48	0.658079
7	50	0.521751
7	58	0.565329
7	60	0.350421
7	65	0.314701
7	66	0.361478
7	67	0.420296
7	70	0.597983
7	71	0.625973
7	72	0.361761
7	73	0.465722
7	74	0.435857
7	75	0.464046
7	78	0.589295
7	80	0.481177
7	81	0.590122
7	82	0.54317
7	83	0.468486
7	91	0.414678
7	92	0.534463
7	93	0.455796
7	100	0.339406
7	101	0.498678
7	103	0.341148
7	104	0.362219
7	105	0.626865
7	110	0.348375
7	111	0.314006
7	112	0.39833
7	113	0.484464
7	114	0.593365
7	116	0.433269
7	118	0.428252
7	119	0.305428
7	121	0.485487
7	124	0.496131
7	126	0.503401
7	127	0.497524
7	128	0.537032
7	129	0.477803
7	131	0.47149
7	133	0.551899
7	134	0.535399
7	136	0.479631
7	137	0.339232
7	138	0.588707
7	140	0.35867
7	141	0.487859
7	144	0.612847
7	145	0.375497
7	146	0.355101
7	147	0.561237
7	148	0.511564
7	150	0.515417
7	151	0.421295
7	153	0.559822
7	154	0.56707
7	156	0.453663
7	157	0.709711
7	161	0.51755
7	162	0.350072
7	163	0.618006
7	165	0.445565
7	170	0.4216
7	171	0.517789
7	172	0.487794
7	173	0.399484
7	174	0.344456
7	175	0.671575
7	176	0.512282
7	177	0.444259
7	178	0.333878
7	179	0.38133
7	181	0.436097
7	183	0.342933
7	184	0.305449
7	188	0.557079
7	189	0.306146
7	190	0.350159
7	192	0.337077
7	193	0.490167
7	195	0.47136
7	196	0.354818
7	197	0.468748
7	199	0.356907
7	200	0.512152
7	201	0.590876
7	202	0.510018
7	204	0.38749
7	207	0.717526
7	208	0.307953
7	209	0.424669
7	213	0.628258
7	215	0.49341
7	216	0.504185
7	220	0.398722
7	225	0.354491
7	226	0.536901
7	227	0.334792
7	230	0.524015
7	231	0.559452
7	233	0.608036
7	237	0.523971
7	238	0.367726
7	239	0.5428
7	240	0.548525
7	242	0.335379
8	11	0.50188
8	18	0.318684
8	19	0.445435
8	20	0.325105
8	21	0.3078
8	23	0.365114
8	24	0.375518
8	26	0.308889
8	27	0.306668
8	28	0.372101
8	35	0.355645
8	36	0.522295
8	37	0.336252
8	40	0.510236
8	43	0.316202
8	44	0.372776
8	50	0.491734
8	58	0.556666
8	60	0.362828
8	70	0.324966
8	72	0.386663
8	73	0.468073
8	74	0.316072
8	78	0.446959
8	80	0.37689
8	81	0.478586
8	82	0.409258
8	83	0.322428
8	88	0.335055
8	92	0.313177
8	101	0.334966
8	103	0.520576
8	105	0.393019
8	109	0.493345
8	110	0.311087
8	112	0.345305
8	114	0.483789
8	116	0.366846
8	118	0.519849
8	119	0.43331
8	124	0.433441
8	128	0.377086
8	129	0.370751
8	131	0.303947
8	133	0.400594
8	134	0.409236
8	136	0.403511
8	138	0.472013
8	140	0.378
8	144	0.337447
8	148	0.412087
8	150	0.439188
8	151	0.341648
8	153	0.444608
8	154	0.551333
8	157	0.542125
8	161	0.354774
8	163	0.361805
8	164	0.425779
8	165	0.367747
8	170	0.642646
8	171	0.429305
8	175	0.356515
8	176	0.303251
8	181	0.408605
8	188	0.311893
8	195	0.349659
8	200	0.312546
8	201	0.432834
8	202	0.349572
8	207	0.434312
8	209	0.389907
8	213	0.398592
8	215	0.394478
8	216	0.413437
8	220	0.452553
8	226	0.528281
8	231	0.518138
8	233	0.390951
8	237	0.482135
8	239	0.353577
8	240	0.310173
9	29	0.315245
9	42	0.304165
9	61	0.3041
9	65	0.427499
9	74	0.36322
9	90	0.309455
9	106	0.407669
9	112	0.389667
9	151	0.317313
9	158	0.32676
9	184	0.329393
9	191	0.416397
9	194	0.307996
9	208	0.363133
9	229	0.329428
9	231	0.421012
9	235	0.477977
9	236	0.369358
9	237	0.3312
9	242	0.31703
10	14	0.443019
10	18	0.405905
10	19	0.320861
10	24	0.427237
10	27	0.460672
10	28	0.408104
10	35	0.479065
10	36	0.379676
10	37	0.313298
10	48	0.340495
10	50	0.308257
10	58	0.386489
10	72	0.413763
10	73	0.301357
10	75	0.358736
10	81	0.425365
10	82	0.314156
10	101	0.442845
10	105	0.398505
10	116	0.359532
10	121	0.504664
10	125	0.385792
10	128	0.369053
10	133	0.310565
10	138	0.41705
10	141	0.355536
10	144	0.344587
10	153	0.444847
10	154	0.446959
10	156	0.307626
10	157	0.414003
10	162	0.32184
10	163	0.32763
10	165	0.335554
10	171	0.41742
10	172	0.474277
10	174	0.375257
10	176	0.364069
10	188	0.387316
10	195	0.40436
10	196	0.432527
10	197	0.391822
10	200	0.322624
10	201	0.335262
10	202	0.390843
10	207	0.328262
10	209	0.33218
10	216	0.358997
10	230	0.307365
10	233	0.438165
10	239	0.493236
10	240	0.405971
11	18	0.350531
11	19	0.42416
11	20	0.507289
11	21	0.343816
11	23	0.403959
11	24	0.349334
11	26	0.333422
11	27	0.332486
11	28	0.329297
11	29	0.370612
11	36	0.589766
11	37	0.364312
11	40	0.496787
11	42	0.333194
11	43	0.474856
11	44	0.474845
11	48	0.331692
11	50	0.31554
11	52	0.311426
11	58	0.43106
11	60	0.437035
11	71	0.472647
11	72	0.31135
11	73	0.508998
11	74	0.304635
11	75	0.451075
11	78	0.418021
11	80	0.468826
11	81	0.442455
11	82	0.609868
11	83	0.510522
11	88	0.376393
11	91	0.314866
11	92	0.404362
11	93	0.499464
11	101	0.353046
11	103	0.603948
11	105	0.38943
11	109	0.317913
11	113	0.380614
11	114	0.497483
11	116	0.324282
11	118	0.449184
11	124	0.444958
11	127	0.363527
11	128	0.352251
11	129	0.400858
11	131	0.333226
11	133	0.332203
11	134	0.412917
11	136	0.487938
11	138	0.465463
11	140	0.323768
11	144	0.478785
11	145	0.325314
11	146	0.339898
11	147	0.361589
11	148	0.369306
11	149	0.312068
11	150	0.407246
11	151	0.380875
11	152	0.321613
11	153	0.398496
11	154	0.419403
11	156	0.413711
11	157	0.575008
11	163	0.482649
11	166	0.391149
11	170	0.436654
11	171	0.33561
11	175	0.481397
11	176	0.438755
11	177	0.393489
11	179	0.343566
11	181	0.384957
11	187	0.354417
11	188	0.387373
11	190	0.483563
11	200	0.314909
11	201	0.403962
11	202	0.30494
11	207	0.484608
11	209	0.321864
11	213	0.486882
11	215	0.474159
11	216	0.476347
11	226	0.543238
11	230	0.370296
11	231	0.460566
11	233	0.339582
11	235	0.357051
11	236	0.401826
11	237	0.394937
12	87	0.324191
12	185	0.485966
12	232	0.345088
13	15	0.318771
13	34	0.324452
13	39	0.354535
13	59	0.402749
13	65	0.350529
13	85	0.316028
13	90	0.347003
13	94	0.378087
13	95	0.54071
13	108	0.423319
13	118	0.387819
13	120	0.33069
13	127	0.311174
13	146	0.45116
13	155	0.51139
13	164	0.364178
13	168	0.382136
13	169	0.439536
13	182	0.334204
13	187	0.331766
13	189	0.370142
13	192	0.365941
13	202	0.349071
13	203	0.33649
13	205	0.472165
13	214	0.468073
13	221	0.404164
13	224	0.334837
13	234	0.397016
13	235	0.429806
13	241	0.336424
14	19	0.365788
14	21	0.302903
14	28	0.35164
14	31	0.396667
14	32	0.44513
14	33	0.423363
14	70	0.321069
14	72	0.394347
14	75	0.327979
14	81	0.32652
14	86	0.30127
14	105	0.329263
14	107	0.326063
14	115	0.314418
14	117	0.46681
14	121	0.390124
14	122	0.349225
14	126	0.333682
14	127	0.343085
14	138	0.343107
14	141	0.35127
14	157	0.30854
14	165	0.338666
14	171	0.302707
14	172	0.315027
14	174	0.326977
14	184	0.332114
14	195	0.309041
14	196	0.313677
14	197	0.308344
14	200	0.344739
14	202	0.357996
14	211	0.444891
14	233	0.323473
15	38	0.369336
15	46	0.586813
15	56	0.507232
15	59	0.687574
15	77	0.399898
15	85	0.656665
15	95	0.509409
15	96	0.625777
15	97	0.450615
15	98	0.312633
15	99	0.431852
15	104	0.421839
15	108	0.407603
15	120	0.482213
15	155	0.628541
15	160	0.419619
15	164	0.350878
15	166	0.36642
15	168	0.623992
15	169	0.655446
15	180	0.607732
15	192	0.496784
15	202	0.390255
15	203	0.634767
15	205	0.536618
15	210	0.870702
15	212	0.352314
15	214	0.399832
15	220	0.39106
15	221	0.492888
15	229	0.366618
15	238	0.455056
16	18	0.38736
16	20	0.333812
16	21	0.349702
16	22	0.42382
16	23	0.352815
16	27	0.34598
16	30	0.327609
16	36	0.379654
16	50	0.325649
16	57	0.328349
16	58	0.328305
16	70	0.473528
16	78	0.325192
16	92	0.359236
16	99	0.338296
16	102	0.329306
16	105	0.331701
16	114	0.436227
16	121	0.304405
16	123	0.325345
16	124	0.354295
16	134	0.406276
16	137	0.385205
16	138	0.374169
16	140	0.313612
16	144	0.346568
16	148	0.376955
16	153	0.358888
16	154	0.337099
16	157	0.343782
16	160	0.467485
16	162	0.376411
16	164	0.646521
16	169	0.304927
16	174	0.368117
16	176	0.458669
16	178	0.680152
16	182	0.552726
16	187	0.478151
16	188	0.322471
16	192	0.39833
16	195	0.371404
16	202	0.372471
16	207	0.304448
16	213	0.383833
16	234	0.308455
16	238	0.526279
16	239	0.320926
17	32	0.567854
17	33	0.510933
17	34	0.57495
17	47	0.387947
17	55	0.409432
17	64	0.428217
17	79	0.551877
17	86	0.303882
17	107	0.320338
17	115	0.528042
17	117	0.752245
17	118	0.304352
17	145	0.364504
17	185	0.329524
17	192	0.334944
17	196	0.315049
17	206	0.347591
17	211	0.431569
18	19	0.571293
18	20	0.495391
18	21	0.670247
18	22	0.441321
18	23	0.508669
18	26	0.395131
18	27	0.729759
18	28	0.561955
18	29	0.500876
18	30	0.412849
18	34	0.308149
18	35	0.572273
18	36	0.685027
18	37	0.365464
18	40	0.362414
18	41	0.4524
18	43	0.340212
18	48	0.716873
18	50	0.548394
18	51	0.433267
18	52	0.31827
18	58	0.614588
18	60	0.52506
18	66	0.348962
18	70	0.653555
18	71	0.589578
18	72	0.321057
18	75	0.520619
18	78	0.683199
18	80	0.460868
18	81	0.685963
18	82	0.513958
18	83	0.484855
18	87	0.32332
18	88	0.355451
18	91	0.390081
18	92	0.628367
18	93	0.313438
18	100	0.424995
18	101	0.344413
18	103	0.374016
18	104	0.39759
18	105	0.783873
18	110	0.441038
18	111	0.353786
18	113	0.620139
18	114	0.536553
18	116	0.538504
18	118	0.535293
18	120	0.399127
18	121	0.626299
18	123	0.428696
18	124	0.351944
18	125	0.347156
18	126	0.386489
18	129	0.485508
18	131	0.580414
18	133	0.412675
18	134	0.479087
18	136	0.360412
18	137	0.453881
18	138	0.587575
18	139	0.367508
18	140	0.341365
18	141	0.401574
18	144	0.604532
18	147	0.425779
18	148	0.596043
18	150	0.37911
18	151	0.361326
18	153	0.455796
18	154	0.608537
18	156	0.389602
18	157	0.641841
18	160	0.404621
18	161	0.617941
18	163	0.670073
18	164	0.347765
18	165	0.339428
18	169	0.309302
18	170	0.391909
18	171	0.57556
18	172	0.625341
18	173	0.372623
18	175	0.571685
18	176	0.464655
18	177	0.315658
18	178	0.365962
18	181	0.530088
18	184	0.342563
18	188	0.577736
18	192	0.48627
18	193	0.494825
18	195	0.579739
18	196	0.600331
18	197	0.593561
18	200	0.609691
18	201	0.619947
18	202	0.668223
18	204	0.400181
18	205	0.438665
18	207	0.686464
18	209	0.5194
18	213	0.577976
18	215	0.546805
18	216	0.543366
18	219	0.350247
18	220	0.457625
18	226	0.378217
18	230	0.499331
18	231	0.331244
18	233	0.753986
18	234	0.380168
18	238	0.350181
18	239	0.559387
18	240	0.437925
19	20	0.554946
19	21	0.503619
19	22	0.487772
19	23	0.492452
19	24	0.327456
19	26	0.495608
19	27	0.505817
19	28	0.587619
19	29	0.424625
19	35	0.475561
19	36	0.672729
19	37	0.321755
19	40	0.46755
19	41	0.390407
19	43	0.313264
19	44	0.477367
19	46	0.345131
19	48	0.484137
19	50	0.495913
19	58	0.576648
19	60	0.49772
19	70	0.530102
19	71	0.511324
19	72	0.407299
19	73	0.481677
19	75	0.526605
19	78	0.65673
19	80	0.463001
19	81	0.566766
19	82	0.431351
19	83	0.492496
19	85	0.380612
19	86	0.321906
19	91	0.389079
19	92	0.539753
19	100	0.410019
19	101	0.317378
19	103	0.454359
19	104	0.492343
19	105	0.594911
19	109	0.507058
19	110	0.422927
19	111	0.311013
19	112	0.317443
19	113	0.352772
19	114	0.516179
19	116	0.350357
19	118	0.457377
19	120	0.353035
19	121	0.465287
19	124	0.452596
19	125	0.446131
19	126	0.336272
19	127	0.321797
19	128	0.437947
19	129	0.446501
19	131	0.449005
19	133	0.394195
19	134	0.444891
19	136	0.413263
19	137	0.471251
19	138	0.48233
19	140	0.425975
19	144	0.516549
19	146	0.411565
19	147	0.400812
19	148	0.455252
19	150	0.448395
19	151	0.442257
19	152	0.317813
19	153	0.437359
19	154	0.592974
19	155	0.359759
19	156	0.39537
19	157	0.59145
19	159	0.419445
19	161	0.470141
19	162	0.440624
19	163	0.694953
19	165	0.371861
19	168	0.428783
19	169	0.373494
19	170	0.475953
19	171	0.593975
19	172	0.507428
19	173	0.679107
19	175	0.497197
19	176	0.496762
19	177	0.338623
19	179	0.363263
19	181	0.500419
19	188	0.598655
19	192	0.40177
19	195	0.481394
19	196	0.35349
19	197	0.372166
19	199	0.369206
19	200	0.534877
19	201	0.530515
19	202	0.535094
19	203	0.311414
19	204	0.437729
19	207	0.669028
19	209	0.525016
19	210	0.318162
19	213	0.583265
19	215	0.397351
19	216	0.447046
19	220	0.606752
19	225	0.479522
19	226	0.453489
19	230	0.451617
19	231	0.487206
19	233	0.544019
19	235	0.408801
19	239	0.384269
19	240	0.483245
19	242	0.458604
20	21	0.537989
20	22	0.558647
20	23	0.581698
20	26	0.408822
20	27	0.423559
20	28	0.381548
20	29	0.450877
20	30	0.514437
20	35	0.358714
20	36	0.536923
20	40	0.576779
20	44	0.333921
20	46	0.409932
20	48	0.559735
20	50	0.437272
20	51	0.433202
20	52	0.374365
20	55	0.358932
20	56	0.320186
20	57	0.300508
20	58	0.537271
20	60	0.512478
20	61	0.33662
20	64	0.307996
20	65	0.389079
20	66	0.68999
20	70	0.506898
20	71	0.61744
20	72	0.390429
20	73	0.349223
20	75	0.388122
20	78	0.51694
20	80	0.567397
20	81	0.504424
20	82	0.48109
20	83	0.485835
20	85	0.427564
20	89	0.334182
20	91	0.322123
20	92	0.589121
20	93	0.391017
20	96	0.414308
20	97	0.409214
20	98	0.352053
20	99	0.411696
20	100	0.424516
20	101	0.35238
20	103	0.436728
20	104	0.583657
20	105	0.456449
20	106	0.314744
20	109	0.3982
20	110	0.507689
20	111	0.492542
20	113	0.380699
20	114	0.560105
20	115	0.430459
20	118	0.460968
20	120	0.45976
20	123	0.438273
20	124	0.447002
20	125	0.445631
20	126	0.498221
20	129	0.459083
20	131	0.380786
20	134	0.55216
20	136	0.463632
20	137	0.399114
20	138	0.36039
20	140	0.624514
20	142	0.407603
20	144	0.64996
20	145	0.458343
20	146	0.57643
20	147	0.584245
20	148	0.466527
20	149	0.332289
20	150	0.334792
20	151	0.509452
20	152	0.35793
20	154	0.46102
20	156	0.441843
20	157	0.632459
20	159	0.404164
20	160	0.348244
20	161	0.468486
20	162	0.363133
20	163	0.607035
20	166	0.340517
20	168	0.354361
20	169	0.406428
20	170	0.45227
20	171	0.315223
20	172	0.382593
20	173	0.54428
20	175	0.571881
20	176	0.409432
20	177	0.359976
20	178	0.360216
20	181	0.554184
20	183	0.305972
20	187	0.462087
20	188	0.534811
20	189	0.421034
20	193	0.531829
20	194	0.432004
20	195	0.31679
20	197	0.34228
20	199	0.417638
20	200	0.380068
20	201	0.424377
20	202	0.352772
20	203	0.347286
20	204	0.545173
20	205	0.415178
20	206	0.46163
20	207	0.623927
20	209	0.480001
20	213	0.597479
20	215	0.320556
20	216	0.415396
20	220	0.3711
20	225	0.409824
20	226	0.599656
20	227	0.548089
20	229	0.317978
20	230	0.573144
20	231	0.508103
20	233	0.454817
20	235	0.476758
20	238	0.399158
20	239	0.306734
20	242	0.565111
21	22	0.421186
21	23	0.486379
21	26	0.359519
21	27	0.498961
21	28	0.563805
21	29	0.417159
21	30	0.523906
21	35	0.490123
21	36	0.656099
21	37	0.379253
21	40	0.306081
21	43	0.545085
21	44	0.320251
21	48	0.52876
21	50	0.495761
21	51	0.323952
21	52	0.346524
21	58	0.620509
21	60	0.450746
21	66	0.513349
21	67	0.375553
21	70	0.453513
21	71	0.545782
21	72	0.456884
21	74	0.352989
21	75	0.534071
21	78	0.552334
21	80	0.424691
21	81	0.704683
21	82	0.513675
21	83	0.539796
21	87	0.308649
21	91	0.405209
21	92	0.625407
21	93	0.381809
21	100	0.354839
21	101	0.560431
21	104	0.388644
21	105	0.553988
21	110	0.422884
21	111	0.302121
21	112	0.325279
21	113	0.581807
21	114	0.592277
21	115	0.302837
21	116	0.491312
21	118	0.469806
21	121	0.497959
21	123	0.438535
21	124	0.561825
21	126	0.453619
21	127	0.328283
21	128	0.409541
21	129	0.373516
21	131	0.478173
21	133	0.398526
21	134	0.454164
21	136	0.303251
21	137	0.37406
21	138	0.626582
21	139	0.353577
21	140	0.469923
21	141	0.33773
21	144	0.655554
21	145	0.312415
21	147	0.569356
21	148	0.479762
21	150	0.374169
21	151	0.438426
21	153	0.363916
21	154	0.535377
21	156	0.334552
21	157	0.640557
21	159	0.322689
21	161	0.512587
21	162	0.349681
21	163	0.610017
21	164	0.34056
21	165	0.350704
21	170	0.456972
21	171	0.436097
21	172	0.501986
21	173	0.42086
21	175	0.482896
21	176	0.372166
21	178	0.390712
21	179	0.307387
21	181	0.445478
21	183	0.322319
21	188	0.591972
21	192	0.443693
21	193	0.440711
21	195	0.6066
21	196	0.358192
21	197	0.534768
21	199	0.364874
21	200	0.580719
21	201	0.618466
21	202	0.549395
21	204	0.518638
21	207	0.700678
21	209	0.495978
21	213	0.598742
21	215	0.371339
21	216	0.530306
21	220	0.394782
21	225	0.359868
21	226	0.518812
21	227	0.353555
21	230	0.433985
21	231	0.344348
21	233	0.607732
21	238	0.352184
21	239	0.387099
21	240	0.485247
21	242	0.334552
22	23	0.35312
22	27	0.330003
22	28	0.320382
22	29	0.379371
22	30	0.364918
22	35	0.378239
22	36	0.311849
22	41	0.356254
22	48	0.407016
22	54	0.421839
22	57	0.464851
22	66	0.531677
22	70	0.39682
22	71	0.465961
22	72	0.432723
22	73	0.41705
22	75	0.359759
22	78	0.466745
22	81	0.318989
22	86	0.349768
22	89	0.329916
22	92	0.438273
22	97	0.446218
22	99	0.317421
22	102	0.441038
22	104	0.575342
22	105	0.347939
22	110	0.328762
22	111	0.487666
22	114	0.313351
22	123	0.332615
22	124	0.410128
22	125	0.375954
22	126	0.368683
22	131	0.336228
22	134	0.400921
22	136	0.325345
22	137	0.47297
22	138	0.368052
22	140	0.557057
22	142	0.325628
22	145	0.410977
22	146	0.573426
22	147	0.428065
22	151	0.390538
22	152	0.333747
22	153	0.304274
22	157	0.364199
22	159	0.668528
22	160	0.469226
22	161	0.375671
22	162	0.577541
22	163	0.339145
22	164	0.314788
22	169	0.346285
22	171	0.345958
22	172	0.301161
22	173	0.485617
22	176	0.325323
22	178	0.665372
22	181	0.350834
22	187	0.362719
22	188	0.334422
22	189	0.539012
22	193	0.317813
22	194	0.314396
22	195	0.341213
22	197	0.353838
22	198	0.301684
22	202	0.399658
22	204	0.372427
22	207	0.387882
22	209	0.400072
22	213	0.517376
22	216	0.331157
22	220	0.348766
22	225	0.694953
22	227	0.445239
22	230	0.501921
22	233	0.4923
22	238	0.452792
22	242	0.30558
22	243	0.514089
23	26	0.613848
23	27	0.458756
23	28	0.526627
23	30	0.459714
23	35	0.400681
23	36	0.611933
23	37	0.353046
23	40	0.52432
23	44	0.36642
23	48	0.444542
23	50	0.568594
23	51	0.356189
23	58	0.683787
23	60	0.453706
23	66	0.448722
23	70	0.376217
23	71	0.433419
23	72	0.335031
23	73	0.370338
23	78	0.56596
23	80	0.528978
23	81	0.584092
23	82	0.451856
23	83	0.473689
23	86	0.34191
23	89	0.371013
23	91	0.500637
23	92	0.583918
23	93	0.457733
23	100	0.335184
23	101	0.304535
23	103	0.489884
23	104	0.309672
23	105	0.498155
23	108	0.303665
23	109	0.552748
23	110	0.48873
23	111	0.400977
23	113	0.346611
23	114	0.723207
23	118	0.567433
23	120	0.419153
23	121	0.395958
23	123	0.325737
23	124	0.454947
23	126	0.394391
23	128	0.312284
23	129	0.349789
23	131	0.313786
23	133	0.412218
23	134	0.455927
23	136	0.544062
23	138	0.464677
23	140	0.433942
23	144	0.62458
23	145	0.434138
23	147	0.498656
23	148	0.526692
23	150	0.507341
23	151	0.338775
23	154	0.573187
23	155	0.31901
23	156	0.40584
23	157	0.624623
23	163	0.590122
23	164	0.387795
23	168	0.424734
23	169	0.339755
23	170	0.553836
23	171	0.342149
23	173	0.551398
23	175	0.387055
23	176	0.540166
23	177	0.333442
23	178	0.322798
23	181	0.563544
23	186	0.440407
23	188	0.655076
23	195	0.384138
23	197	0.411413
23	200	0.344282
23	201	0.466388
23	202	0.412022
23	203	0.321862
23	204	0.410063
23	205	0.349202
23	206	0.335945
23	207	0.608232
23	209	0.514568
23	213	0.425823
23	215	0.435901
23	216	0.433136
23	221	0.30114
23	226	0.590927
23	227	0.327521
23	230	0.485726
23	231	0.534594
23	233	0.432266
23	237	0.310042
23	238	0.405949
23	240	0.367334
23	242	0.335989
24	26	0.429458
24	29	0.406929
24	36	0.389123
24	37	0.418925
24	40	0.406515
24	42	0.476061
24	43	0.374996
24	61	0.335684
24	67	0.416683
24	72	0.336163
24	73	0.331831
24	74	0.503183
24	75	0.30114
24	80	0.375627
24	82	0.482004
24	83	0.378152
24	84	0.312067
24	90	0.316855
24	91	0.392671
24	101	0.4551
24	103	0.457211
24	112	0.393825
24	113	0.349789
24	116	0.349857
24	121	0.319794
24	124	0.358649
24	127	0.457951
24	128	0.480393
24	134	0.35127
24	138	0.392497
24	139	0.360499
24	141	0.30952
24	144	0.403816
24	150	0.416571
24	151	0.355579
24	153	0.446676
24	154	0.373189
24	156	0.474973
24	157	0.441952
24	163	0.376411
24	165	0.355732
24	171	0.43146
24	172	0.382985
24	175	0.38527
24	177	0.315593
24	179	0.331374
24	183	0.398113
24	184	0.344892
24	188	0.313721
24	190	0.363786
24	200	0.318031
24	207	0.472622
24	208	0.428435
24	209	0.349071
24	213	0.385618
24	216	0.340342
24	226	0.54613
24	231	0.478499
24	233	0.313155
24	235	0.336794
24	237	0.417094
24	239	0.352227
25	69	0.36322
25	126	0.304296
26	27	0.428239
26	28	0.307779
26	29	0.308606
26	35	0.399092
26	36	0.530175
26	37	0.392466
26	40	0.375105
26	42	0.330569
26	43	0.382941
26	44	0.379458
26	48	0.350638
26	50	0.368313
26	58	0.513719
26	60	0.35891
26	61	0.319337
26	67	0.355864
26	71	0.464547
26	73	0.303969
26	75	0.364308
26	78	0.471534
26	80	0.516527
26	81	0.384552
26	82	0.365984
26	83	0.487163
26	91	0.32319
26	92	0.53677
26	93	0.361021
26	100	0.328414
26	101	0.3812
26	103	0.493715
26	105	0.413785
26	109	0.455012
26	110	0.484942
26	111	0.34042
26	113	0.353294
26	114	0.516113
26	118	0.434379
26	119	0.313264
26	120	0.414332
26	124	0.328936
26	128	0.436314
26	129	0.34056
26	133	0.414199
26	134	0.457102
26	136	0.372123
26	138	0.342759
26	144	0.535834
26	146	0.388143
26	147	0.403337
26	148	0.419292
26	150	0.498242
26	151	0.378413
26	153	0.30188
26	154	0.462109
26	156	0.453663
26	157	0.493562
26	161	0.315506
26	163	0.589795
26	168	0.386489
26	170	0.312284
26	171	0.374343
26	172	0.354426
26	173	0.399658
26	175	0.458887
26	176	0.342084
26	177	0.347547
26	179	0.336577
26	181	0.407146
26	188	0.466244
26	190	0.338318
26	193	0.30164
26	195	0.322363
26	197	0.387207
26	200	0.32763
26	201	0.394436
26	207	0.501638
26	209	0.381113
26	213	0.392149
26	215	0.345305
26	216	0.387033
26	226	0.482069
26	230	0.471882
26	231	0.42715
26	233	0.414025
26	235	0.328566
26	237	0.397177
26	239	0.414982
27	28	0.542365
27	29	0.418988
27	30	0.387882
27	35	0.4184
27	36	0.654314
27	37	0.461687
27	40	0.349311
27	42	0.310717
27	43	0.334792
27	48	0.594563
27	50	0.550027
27	51	0.363546
27	58	0.5465
27	60	0.427716
27	67	0.371863
27	70	0.614483
27	71	0.535617
27	73	0.380024
27	75	0.513371
27	77	0.30299
27	78	0.546849
27	80	0.428435
27	81	0.596826
27	82	0.595216
27	83	0.487315
27	87	0.309607
27	91	0.477237
27	92	0.652616
27	100	0.343825
27	103	0.426476
27	105	0.681262
27	109	0.303882
27	110	0.423863
27	113	0.414852
27	114	0.574319
27	116	0.482409
27	118	0.444937
27	121	0.5529
27	123	0.393955
27	124	0.346568
27	125	0.310978
27	126	0.488142
27	127	0.370425
27	128	0.373973
27	129	0.461608
27	131	0.410215
27	133	0.420598
27	134	0.511956
27	136	0.392671
27	137	0.456253
27	138	0.506536
27	141	0.354012
27	144	0.544302
27	145	0.31666
27	147	0.492931
27	148	0.554337
27	150	0.380982
27	151	0.328479
27	153	0.574036
27	154	0.56633
27	156	0.391191
27	157	0.640862
27	161	0.423733
27	163	0.595694
27	165	0.336359
27	170	0.438556
27	171	0.548786
27	172	0.580261
27	174	0.329132
27	175	0.632046
27	176	0.425757
27	177	0.468617
27	178	0.320338
27	181	0.460324
27	184	0.366528
27	188	0.552269
27	193	0.425757
27	195	0.464568
27	196	0.462936
27	197	0.5125
27	200	0.522165
27	201	0.432301
27	202	0.448896
27	207	0.585159
27	209	0.505926
27	212	0.301684
27	213	0.475278
27	215	0.566309
27	216	0.489622
27	220	0.359541
27	226	0.4923
27	230	0.527258
27	231	0.37184
27	233	0.607166
27	236	0.359193
27	239	0.415918
27	240	0.382462
27	241	0.326259
28	30	0.422862
28	35	0.43109
28	36	0.598241
28	40	0.459214
28	41	0.398744
28	43	0.302772
28	48	0.494825
28	50	0.57741
28	58	0.581676
28	60	0.505991
28	66	0.398483
28	67	0.380222
28	70	0.410348
28	71	0.387055
28	72	0.413546
28	75	0.448069
28	78	0.489383
28	80	0.410302
28	81	0.609451
28	82	0.397024
28	83	0.519444
28	86	0.329198
28	87	0.336381
28	91	0.505752
28	92	0.551137
28	101	0.415505
28	103	0.517245
28	105	0.659995
28	109	0.481264
28	110	0.421861
28	113	0.404948
28	114	0.552269
28	116	0.466758
28	118	0.401663
28	119	0.310717
28	120	0.302295
28	121	0.506906
28	124	0.41779
28	126	0.41631
28	128	0.36248
28	129	0.331178
28	133	0.411456
28	134	0.367769
28	136	0.355318
28	137	0.416288
28	138	0.472122
28	140	0.342867
28	144	0.460498
28	147	0.488774
28	148	0.525734
28	150	0.338514
28	153	0.412327
28	154	0.544258
28	157	0.642211
28	161	0.371056
28	162	0.306342
28	163	0.518812
28	164	0.364744
28	168	0.306037
28	169	0.409127
28	170	0.543518
28	171	0.488273
28	172	0.436206
[truncated: 5,997 more rows]

## Sheet: Location0.4
1	4	0.803768
1	5	0.660931
1	7	0.579891
1	10	0.472862
1	11	0.411382
1	18	0.662847
1	19	0.620553
1	21	0.587075
1	27	0.554924
1	28	0.584092
1	29	0.479131
1	35	0.446414
1	36	0.724949
1	37	0.453448
1	41	0.436118
1	48	0.565525
1	50	0.623361
1	58	0.666547
1	60	0.53714
1	67	0.401097
1	70	0.518021
1	71	0.490297
1	73	0.407625
1	75	0.667526
1	78	0.589904
1	80	0.441582
1	81	0.65525
1	82	0.493628
1	83	0.466701
1	87	0.530131
1	92	0.544563
1	101	0.461194
1	105	0.741231
1	113	0.45129
1	114	0.604488
1	116	0.479852
1	118	0.581059
1	121	0.598502
1	129	0.527585
1	131	0.520097
1	133	0.438861
1	137	0.464873
1	138	0.544672
1	144	0.519683
1	147	0.414939
1	148	0.581567
1	151	0.449919
1	153	0.569443
1	154	0.646848
1	157	0.708144
1	161	0.43762
1	163	0.549504
1	170	0.581284
1	171	0.629107
1	172	0.585094
1	173	0.455644
1	175	0.492126
1	176	0.598589
1	181	0.52593
1	188	0.489035
1	195	0.604858
1	196	0.429371
1	197	0.546348
1	200	0.683482
1	201	0.604644
1	202	0.684135
1	207	0.58973
1	209	0.444521
1	213	0.599047
1	215	0.578106
1	216	0.514764
1	220	0.536183
1	226	0.508342
1	231	0.464851
1	233	0.662672
1	239	0.561106
1	240	0.552203
2	115	0.429305
2	135	0.410324
3	7	0.471599
3	20	0.426127
3	21	0.406624
3	23	0.488774
3	36	0.417725
3	58	0.488142
3	66	0.406363
3	75	0.410738
3	80	0.419575
3	81	0.427303
3	83	0.414656
3	91	0.449723
3	101	0.443084
3	103	0.42628
3	114	0.545325
3	126	0.453881
3	144	0.488491
3	147	0.55549
3	154	0.446784
3	157	0.526736
3	163	0.425496
3	170	0.403054
3	175	0.424887
3	177	0.403424
3	181	0.417007
3	188	0.538991
3	195	0.438078
3	197	0.439841
3	200	0.400268
3	201	0.40076
3	207	0.430764
3	209	0.422079
3	216	0.475583
3	226	0.49058
3	231	0.471904
4	5	0.645041
4	7	0.567027
4	10	0.496893
4	18	0.764413
4	19	0.548982
4	20	0.413393
4	21	0.588076
4	23	0.450855
4	27	0.6204
4	28	0.628715
4	29	0.452836
4	35	0.60451
4	36	0.707252
4	41	0.469575
4	48	0.693212
4	50	0.65144
4	58	0.669181
4	60	0.531677
4	70	0.553132
4	71	0.51644
4	75	0.50634
4	78	0.628215
4	81	0.704988
4	82	0.495913
4	83	0.484529
4	87	0.428304
4	91	0.452009
4	92	0.547415
4	100	0.422971
4	105	0.763564
4	110	0.512696
4	113	0.521925
4	114	0.575799
4	116	0.543478
4	118	0.541508
4	121	0.674296
4	129	0.461477
4	131	0.560736
4	133	0.46779
4	134	0.461651
4	137	0.420424
4	138	0.638794
4	144	0.530088
4	147	0.421208
4	148	0.609734
4	153	0.533636
4	154	0.676037
4	157	0.694823
4	161	0.477324
4	163	0.586378
4	164	0.455665
4	170	0.465635
4	171	0.667374
4	172	0.648241
4	173	0.41803
4	175	0.513349
4	176	0.55512
4	178	0.409475
4	181	0.540906
4	188	0.552095
4	192	0.473885
4	195	0.581241
4	196	0.495478
4	197	0.49637
4	200	0.689033
4	201	0.592128
4	202	0.690252
4	205	0.43725
4	207	0.616482
4	209	0.480001
4	213	0.548634
4	215	0.515068
4	216	0.43836
4	220	0.519748
4	226	0.440885
4	230	0.440363
4	233	0.743015
4	234	0.480461
4	238	0.426824
4	239	0.600984
4	240	0.502574
5	7	0.557297
5	8	0.497546
5	10	0.477629
5	11	0.516214
5	18	0.635224
5	19	0.622664
5	20	0.48738
5	21	0.5263
5	23	0.433202
5	24	0.440668
5	26	0.446066
5	27	0.586117
5	28	0.501464
5	29	0.519117
5	35	0.565982
5	36	0.723055
5	37	0.448017
5	40	0.473493
5	43	0.523623
5	44	0.530828
5	48	0.587336
5	50	0.585703
5	58	0.619225
5	60	0.479392
5	70	0.565071
5	71	0.527389
5	75	0.668441
5	78	0.616439
5	80	0.542038
5	81	0.606143
5	82	0.618028
5	83	0.545869
5	91	0.526104
5	92	0.523384
5	101	0.426258
5	103	0.537315
5	105	0.658471
5	110	0.407037
5	113	0.532373
5	114	0.635115
5	116	0.459412
5	118	0.491747
5	121	0.562695
5	122	0.424486
5	124	0.466571
5	126	0.402118
5	127	0.526997
5	128	0.461782
5	129	0.548982
5	131	0.433485
5	134	0.51792
5	137	0.427847
5	138	0.562369
5	139	0.436162
5	140	0.409366
5	141	0.406123
5	144	0.579543
5	147	0.484398
5	148	0.547893
5	150	0.418313
5	151	0.517354
5	153	0.528499
5	154	0.637988
5	156	0.619638
5	157	0.717025
5	161	0.535356
5	163	0.704574
5	165	0.404055
5	170	0.494542
5	171	0.56041
5	172	0.591537
5	173	0.404665
5	175	0.648241
5	176	0.455208
5	179	0.440603
5	181	0.563697
5	184	0.421883
5	188	0.479392
5	195	0.440907
5	196	0.419902
5	197	0.483484
5	200	0.588424
5	201	0.544337
5	202	0.51065
5	207	0.700243
5	209	0.479327
5	213	0.582308
5	215	0.549461
5	216	0.632742
5	220	0.452183
5	226	0.541624
5	230	0.451443
5	231	0.550179
5	233	0.655642
5	236	0.400572
5	237	0.451922
5	239	0.565264
5	240	0.414112
6	64	0.432549
6	65	0.423123
6	183	0.501856
6	185	0.494651
6	232	0.495652
7	10	0.441996
7	11	0.434227
7	18	0.582308
7	19	0.549896
7	20	0.526474
7	21	0.556666
7	22	0.420468
7	23	0.482047
7	26	0.505208
7	27	0.574972
7	28	0.460824
7	29	0.559125
7	35	0.418226
7	36	0.711845
7	37	0.522537
7	40	0.406319
7	48	0.658079
7	50	0.521751
7	58	0.565329
7	67	0.420296
7	70	0.597983
7	71	0.625973
7	73	0.465722
7	74	0.435857
7	75	0.464046
7	78	0.589295
7	80	0.481177
7	81	0.590122
7	82	0.54317
7	83	0.468486
7	91	0.414678
7	92	0.534463
7	93	0.455796
7	101	0.498678
7	105	0.626865
7	113	0.484464
7	114	0.593365
7	116	0.433269
7	118	0.428252
7	121	0.485487
7	124	0.496131
7	126	0.503401
7	127	0.497524
7	128	0.537032
7	129	0.477803
7	131	0.47149
7	133	0.551899
7	134	0.535399
7	136	0.479631
7	138	0.588707
7	141	0.487859
7	144	0.612847
7	147	0.561237
7	148	0.511564
7	150	0.515417
7	151	0.421295
7	153	0.559822
7	154	0.56707
7	156	0.453663
7	157	0.709711
7	161	0.51755
7	163	0.618006
7	165	0.445565
7	170	0.4216
7	171	0.517789
7	172	0.487794
7	175	0.671575
7	176	0.512282
7	177	0.444259
7	181	0.436097
7	188	0.557079
7	193	0.490167
7	195	0.47136
7	197	0.468748
7	200	0.512152
7	201	0.590876
7	202	0.510018
7	207	0.717526
7	209	0.424669
7	213	0.628258
7	215	0.49341
7	216	0.504185
7	226	0.536901
7	230	0.524015
7	231	0.559452
7	233	0.608036
7	237	0.523971
7	239	0.5428
7	240	0.548525
8	11	0.50188
8	19	0.445435
8	36	0.522295
8	40	0.510236
8	50	0.491734
8	58	0.556666
8	73	0.468073
8	78	0.446959
8	81	0.478586
8	82	0.409258
8	103	0.520576
8	109	0.493345
8	114	0.483789
8	118	0.519849
8	119	0.43331
8	124	0.433441
8	133	0.400594
8	134	0.409236
8	136	0.403511
8	138	0.472013
8	148	0.412087
8	150	0.439188
8	153	0.444608
8	154	0.551333
8	157	0.542125
8	164	0.425779
8	170	0.642646
8	171	0.429305
8	181	0.408605
8	201	0.432834
8	207	0.434312
8	216	0.413437
8	220	0.452553
8	226	0.528281
8	231	0.518138
8	237	0.482135
9	65	0.427499
9	106	0.407669
9	191	0.416397
9	231	0.421012
9	235	0.477977
10	14	0.443019
10	18	0.405905
10	24	0.427237
10	27	0.460672
10	28	0.408104
10	35	0.479065
10	72	0.413763
10	81	0.425365
10	101	0.442845
10	121	0.504664
10	138	0.41705
10	153	0.444847
10	154	0.446959
10	157	0.414003
10	171	0.41742
10	172	0.474277
10	195	0.40436
10	196	0.432527
10	233	0.438165
10	239	0.493236
10	240	0.405971
11	19	0.42416
11	20	0.507289
11	23	0.403959
11	36	0.589766
11	40	0.496787
11	43	0.474856
11	44	0.474845
11	58	0.43106
11	60	0.437035
11	71	0.472647
11	73	0.508998
11	75	0.451075
11	78	0.418021
11	80	0.468826
11	81	0.442455
11	82	0.609868
11	83	0.510522
11	92	0.404362
11	93	0.499464
11	103	0.603948
11	114	0.497483
11	118	0.449184
11	124	0.444958
11	129	0.400858
11	134	0.412917
11	136	0.487938
11	138	0.465463
11	144	0.478785
11	150	0.407246
11	154	0.419403
11	156	0.413711
11	157	0.575008
11	163	0.482649
11	170	0.436654
11	175	0.481397
11	176	0.438755
11	190	0.483563
11	201	0.403962
11	207	0.484608
11	213	0.486882
11	215	0.474159
11	216	0.476347
11	226	0.543238
11	231	0.460566
11	236	0.401826
12	185	0.485966
13	59	0.402749
13	95	0.54071
13	108	0.423319
13	146	0.45116
13	155	0.51139
13	169	0.439536
13	205	0.472165
13	214	0.468073
13	221	0.404164
13	235	0.429806
14	32	0.44513
14	33	0.423363
14	117	0.46681
14	211	0.444891
15	46	0.586813
15	56	0.507232
15	59	0.687574
15	85	0.656665
15	95	0.509409
15	96	0.625777
15	97	0.450615
15	99	0.431852
15	104	0.421839
15	108	0.407603
15	120	0.482213
15	155	0.628541
15	160	0.419619
15	168	0.623992
15	169	0.655446
15	180	0.607732
15	192	0.496784
15	203	0.634767
15	205	0.536618
15	210	0.870702
15	221	0.492888
15	238	0.455056
16	22	0.42382
16	70	0.473528
16	114	0.436227
16	134	0.406276
16	160	0.467485
16	164	0.646521
16	176	0.458669
16	178	0.680152
16	182	0.552726
16	187	0.478151
16	238	0.526279
17	32	0.567854
17	33	0.510933
17	34	0.57495
17	55	0.409432
17	64	0.428217
17	79	0.551877
17	115	0.528042
17	117	0.752245
17	211	0.431569
18	19	0.571293
18	20	0.495391
18	21	0.670247
18	22	0.441321
18	23	0.508669
18	27	0.729759
18	28	0.561955
18	29	0.500876
18	30	0.412849
18	35	0.572273
18	36	0.685027
18	41	0.4524
18	48	0.716873
18	50	0.548394
18	51	0.433267
18	58	0.614588
18	60	0.52506
18	70	0.653555
18	71	0.589578
18	75	0.520619
18	78	0.683199
18	80	0.460868
18	81	0.685963
18	82	0.513958
18	83	0.484855
18	92	0.628367
18	100	0.424995
18	105	0.783873
18	110	0.441038
18	113	0.620139
18	114	0.536553
18	116	0.538504
18	118	0.535293
18	121	0.626299
18	123	0.428696
18	129	0.485508
18	131	0.580414
18	133	0.412675
18	134	0.479087
18	137	0.453881
18	138	0.587575
18	141	0.401574
18	144	0.604532
18	147	0.425779
18	148	0.596043
18	153	0.455796
18	154	0.608537
18	157	0.641841
18	160	0.404621
18	161	0.617941
18	163	0.670073
18	171	0.57556
18	172	0.625341
18	175	0.571685
18	176	0.464655
18	181	0.530088
18	188	0.577736
18	192	0.48627
18	193	0.494825
18	195	0.579739
18	196	0.600331
18	197	0.593561
18	200	0.609691
18	201	0.619947
18	202	0.668223
18	204	0.400181
18	205	0.438665
18	207	0.686464
18	209	0.5194
18	213	0.577976
18	215	0.546805
18	216	0.543366
18	220	0.457625
18	230	0.499331
18	233	0.753986
18	239	0.559387
18	240	0.437925
19	20	0.554946
19	21	0.503619
19	22	0.487772
19	23	0.492452
19	26	0.495608
19	27	0.505817
19	28	0.587619
19	29	0.424625
19	35	0.475561
19	36	0.672729
19	40	0.46755
19	44	0.477367
19	48	0.484137
19	50	0.495913
19	58	0.576648
19	60	0.49772
19	70	0.530102
19	71	0.511324
19	72	0.407299
19	73	0.481677
19	75	0.526605
19	78	0.65673
19	80	0.463001
19	81	0.566766
19	82	0.431351
19	83	0.492496
19	92	0.539753
19	100	0.410019
19	103	0.454359
19	104	0.492343
19	105	0.594911
19	109	0.507058
19	110	0.422927
19	114	0.516179
19	118	0.457377
19	121	0.465287
19	124	0.452596
19	125	0.446131
19	128	0.437947
19	129	0.446501
19	131	0.449005
19	134	0.444891
19	136	0.413263
19	137	0.471251
19	138	0.48233
19	140	0.425975
19	144	0.516549
19	146	0.411565
19	147	0.400812
19	148	0.455252
19	150	0.448395
19	151	0.442257
19	153	0.437359
19	154	0.592974
19	157	0.59145
19	159	0.419445
19	161	0.470141
19	162	0.440624
19	163	0.694953
19	168	0.428783
19	170	0.475953
19	171	0.593975
19	172	0.507428
19	173	0.679107
19	175	0.497197
19	176	0.496762
19	181	0.500419
19	188	0.598655
19	192	0.40177
19	195	0.481394
19	200	0.534877
19	201	0.530515
19	202	0.535094
19	204	0.437729
19	207	0.669028
19	209	0.525016
19	213	0.583265
19	216	0.447046
19	220	0.606752
19	225	0.479522
19	226	0.453489
19	230	0.451617
19	231	0.487206
19	233	0.544019
19	235	0.408801
19	240	0.483245
19	242	0.458604
20	21	0.537989
20	22	0.558647
20	23	0.581698
20	26	0.408822
20	27	0.423559
20	29	0.450877
20	30	0.514437
20	36	0.536923
20	40	0.576779
20	46	0.409932
20	48	0.559735
20	50	0.437272
20	51	0.433202
20	58	0.537271
20	60	0.512478
20	66	0.68999
20	70	0.506898
20	71	0.61744
20	78	0.51694
20	80	0.567397
20	81	0.504424
20	82	0.48109
20	83	0.485835
20	85	0.427564
20	92	0.589121
20	96	0.414308
20	97	0.409214
20	99	0.411696
20	100	0.424516
20	103	0.436728
20	104	0.583657
20	105	0.456449
20	110	0.507689
20	111	0.492542
20	114	0.560105
20	115	0.430459
20	118	0.460968
20	120	0.45976
20	123	0.438273
20	124	0.447002
20	125	0.445631
20	126	0.498221
20	129	0.459083
20	134	0.55216
20	136	0.463632
20	140	0.624514
20	142	0.407603
20	144	0.64996
20	145	0.458343
20	146	0.57643
20	147	0.584245
20	148	0.466527
20	151	0.509452
20	154	0.46102
20	156	0.441843
20	157	0.632459
20	159	0.404164
20	161	0.468486
20	163	0.607035
20	169	0.406428
20	170	0.45227
20	173	0.54428
20	175	0.571881
20	176	0.409432
20	181	0.554184
20	187	0.462087
20	188	0.534811
20	189	0.421034
20	193	0.531829
20	194	0.432004
20	199	0.417638
20	201	0.424377
20	204	0.545173
20	205	0.415178
20	206	0.46163
20	207	0.623927
20	209	0.480001
20	213	0.597479
20	216	0.415396
20	225	0.409824
20	226	0.599656
20	227	0.548089
20	230	0.573144
20	231	0.508103
20	233	0.454817
20	235	0.476758
20	242	0.565111
21	22	0.421186
21	23	0.486379
21	27	0.498961
21	28	0.563805
21	29	0.417159
21	30	0.523906
21	35	0.490123
21	36	0.656099
21	43	0.545085
21	48	0.52876
21	50	0.495761
21	58	0.620509
21	60	0.450746
21	66	0.513349
21	70	0.453513
21	71	0.545782
21	72	0.456884
21	75	0.534071
21	78	0.552334
21	80	0.424691
21	81	0.704683
21	82	0.513675
21	83	0.539796
21	91	0.405209
21	92	0.625407
21	101	0.560431
21	105	0.553988
21	110	0.422884
21	113	0.581807
21	114	0.592277
21	116	0.491312
21	118	0.469806
21	121	0.497959
21	123	0.438535
21	124	0.561825
21	126	0.453619
21	128	0.409541
21	131	0.478173
21	134	0.454164
21	138	0.626582
21	140	0.469923
21	144	0.655554
21	147	0.569356
21	148	0.479762
21	151	0.438426
21	154	0.535377
21	157	0.640557
21	161	0.512587
21	163	0.610017
21	170	0.456972
21	171	0.436097
21	172	0.501986
21	173	0.42086
21	175	0.482896
21	181	0.445478
21	188	0.591972
21	192	0.443693
21	193	0.440711
21	195	0.6066
21	197	0.534768
21	200	0.580719
21	201	0.618466
21	202	0.549395
21	204	0.518638
21	207	0.700678
21	209	0.495978
21	213	0.598742
21	216	0.530306
21	226	0.518812
21	230	0.433985
21	233	0.607732
21	240	0.485247
22	48	0.407016
22	54	0.421839
22	57	0.464851
22	66	0.531677
22	71	0.465961
22	72	0.432723
22	73	0.41705
22	78	0.466745
22	92	0.438273
22	97	0.446218
22	102	0.441038
22	104	0.575342
22	111	0.487666
22	124	0.410128
22	134	0.400921
22	137	0.47297
22	140	0.557057
22	145	0.410977
22	146	0.573426
22	147	0.428065
22	159	0.668528
22	160	0.469226
22	162	0.577541
22	173	0.485617
22	178	0.665372
22	189	0.539012
22	209	0.400072
22	213	0.517376
22	225	0.694953
22	227	0.445239
22	230	0.501921
22	233	0.4923
22	238	0.452792
22	243	0.514089
23	26	0.613848
23	27	0.458756
23	28	0.526627
23	30	0.459714
23	35	0.400681
23	36	0.611933
23	40	0.52432
23	48	0.444542
23	50	0.568594
23	58	0.683787
23	60	0.453706
23	66	0.448722
23	71	0.433419
23	78	0.56596
23	80	0.528978
23	81	0.584092
23	82	0.451856
23	83	0.473689
23	91	0.500637
23	92	0.583918
23	93	0.457733
23	103	0.489884
23	105	0.498155
23	109	0.552748
23	110	0.48873
23	111	0.400977
23	114	0.723207
23	118	0.567433
23	120	0.419153
23	124	0.454947
23	133	0.412218
23	134	0.455927
23	136	0.544062
23	138	0.464677
23	140	0.433942
23	144	0.62458
23	145	0.434138
23	147	0.498656
23	148	0.526692
23	150	0.507341
23	154	0.573187
23	156	0.40584
23	157	0.624623
23	163	0.590122
23	168	0.424734
23	170	0.553836
23	173	0.551398
23	176	0.540166
23	181	0.563544
23	186	0.440407
23	188	0.655076
23	197	0.411413
23	201	0.466388
23	202	0.412022
23	204	0.410063
23	207	0.608232
23	209	0.514568
23	213	0.425823
23	215	0.435901
23	216	0.433136
23	226	0.590927
23	230	0.485726
23	231	0.534594
23	233	0.432266
23	238	0.405949
24	26	0.429458
24	29	0.406929
24	37	0.418925
24	40	0.406515
24	42	0.476061
24	67	0.416683
24	74	0.503183
24	82	0.482004
24	101	0.4551
24	103	0.457211
24	127	0.457951
24	128	0.480393
24	144	0.403816
24	150	0.416571
24	153	0.446676
24	156	0.474973
24	157	0.441952
24	171	0.43146
24	207	0.472622
24	208	0.428435
24	226	0.54613
24	231	0.478499
24	237	0.417094
26	27	0.428239
26	36	0.530175
26	58	0.513719
26	71	0.464547
26	78	0.471534
26	80	0.516527
26	83	0.487163
26	92	0.53677
26	103	0.493715
26	105	0.413785
26	109	0.455012
26	110	0.484942
26	114	0.516113
26	118	0.434379
26	120	0.414332
26	128	0.436314
26	133	0.414199
26	134	0.457102
26	144	0.535834
26	147	0.403337
26	148	0.419292
26	150	0.498242
26	154	0.462109
26	156	0.453663
26	157	0.493562
26	163	0.589795
26	175	0.458887
26	181	0.407146
26	188	0.466244
26	207	0.501638
26	226	0.482069
26	230	0.471882
26	231	0.42715
26	233	0.414025
26	239	0.414982
27	28	0.542365
27	29	0.418988
27	35	0.4184
27	36	0.654314
27	37	0.461687
27	48	0.594563
27	50	0.550027
27	58	0.5465
27	60	0.427716
27	70	0.614483
27	71	0.535617
27	75	0.513371
27	78	0.546849
27	80	0.428435
27	81	0.596826
27	82	0.595216
27	83	0.487315
27	91	0.477237
27	92	0.652616
27	103	0.426476
27	105	0.681262
27	110	0.423863
27	113	0.414852
27	114	0.574319
27	116	0.482409
27	118	0.444937
27	121	0.5529
27	126	0.488142
27	129	0.461608
27	131	0.410215
27	133	0.420598
27	134	0.511956
27	137	0.456253
27	138	0.506536
27	144	0.544302
27	147	0.492931
27	148	0.554337
27	153	0.574036
27	154	0.56633
27	157	0.640862
27	161	0.423733
27	163	0.595694
27	170	0.438556
27	171	0.548786
27	172	0.580261
27	175	0.632046
27	176	0.425757
27	177	0.468617
27	181	0.460324
27	188	0.552269
27	193	0.425757
27	195	0.464568
27	196	0.462936
27	197	0.5125
27	200	0.522165
27	201	0.432301
27	202	0.448896
27	207	0.585159
27	209	0.505926
27	213	0.475278
27	215	0.566309
27	216	0.489622
27	226	0.4923
27	230	0.527258
27	233	0.607166
27	239	0.415918
28	30	0.422862
28	35	0.43109
28	36	0.598241
28	40	0.459214
28	48	0.494825
28	50	0.57741
28	58	0.581676
28	60	0.505991
28	70	0.410348
28	72	0.413546
28	75	0.448069
28	78	0.489383
28	80	0.410302
28	81	0.609451
28	83	0.519444
28	91	0.505752
28	92	0.551137
28	101	0.415505
28	103	0.517245
28	105	0.659995
28	109	0.481264
28	110	0.421861
28	113	0.404948
28	114	0.552269
28	116	0.466758
28	118	0.401663
28	121	0.506906
28	124	0.41779
28	126	0.41631
28	133	0.411456
28	137	0.416288
28	138	0.472122
28	144	0.460498
28	147	0.488774
28	148	0.525734
28	153	0.412327
28	154	0.544258
28	157	0.642211
28	163	0.518812
28	169	0.409127
28	170	0.543518
28	171	0.488273
28	172	0.436206
28	173	0.516853
28	176	0.530327
28	177	0.452945
28	178	0.402902
28	181	0.488469
28	188	0.650875
28	192	0.404578
28	195	0.506666
28	196	0.440646
28	200	0.598437
28	201	0.577859
28	202	0.594846
28	204	0.445043
28	207	0.567702
28	209	0.541624
28	215	0.419902
28	216	0.468726
28	226	0.538947
28	230	0.454142
28	233	0.552465
29	36	0.501703
29	37	0.405908
29	40	0.431787
29	42	0.419837
29	48	0.458844
29	51	0.448286
29	65	0.464917
29	70	0.49387
29	71	0.475082
29	80	0.459736
29	82	0.526431
29	90	0.477324
29	100	0.439601
29	105	0.40769
29	112	0.447786
29	113	0.455165
29	124	0.491712
29	127	0.518616
29	129	0.440015
29	134	0.439688
29	138	0.439405
29	139	0.492648
29	141	0.474472
29	144	0.404229
29	147	0.421752
29	151	0.586835
29	153	0.485051
29	156	0.647435
29	157	0.448025
29	161	0.538773
29	163	0.529478
29	171	0.409649
29	172	0.533396
29	175	0.711322
29	184	0.500071
29	193	0.459214
29	207	0.590688
29	213	0.461303
29	215	0.432309
29	216	0.545651
29	231	0.432745
29	233	0.561737
29	235	0.48971
29	239	0.471251
30	36	0.414351
30	55	0.406907
30	58	0.506579
30	64	0.411021
30	66	0.686007
30	72	0.423863
30	81	0.482091
30	92	0.500767
30	104	0.443084
30	110	0.432157
30	114	0.443432
30	144	0.560671
30	145	0.467485
30	147	0.453271
30	154	0.402553
30	157	0.441734
30	188	0.440777
30	193	0.414308
30	195	0.407103
30	204	0.627888
30	226	0.413393
30	227	0.426127
30	230	0.404229
30	242	0.495304
31	32	0.554753
31	33	0.464952
31	117	0.43155
31	211	0.557518
32	33	0.690665
32	34	0.545782
32	79	0.598611
32	107	0.433572
32	115	0.41335
32	117	0.788944
32	211	0.705423
33	34	0.486989
33	41	0.482679
33	72	0.414808
33	79	0.520488
33	86	0.487489
33	107	0.484594
33	117	0.737225
33	174	0.567702
33	211	0.741622
34	62	0.42234
34	79	0.625211
34	117	0.591058
34	192	0.46052
34	211	0.480611
35	36	0.433855
35	48	0.464307
35	58	0.472883
35	71	0.402249
35	78	0.512043
35	80	0.487881
35	81	0.561498
35	92	0.491364
35	100	0.430655
35	105	0.561563
35	110	0.481351
35	116	0.493554
35	121	0.498046
35	131	0.468203
35	133	0.407625
35	138	0.486858
35	140	0.442344
35	144	0.47358
35	153	0.430938
35	154	0.499396
35	157	0.477476
35	161	0.45769
35	163	0.522752
35	171	0.427869
35	172	0.503053
35	175	0.403859
35	181	0.408975
35	188	0.499244
35	192	0.46459
35	195	0.520118
35	197	0.446871
35	200	0.53529
35	201	0.43993
35	202	0.546021
35	207	0.553705
35	209	0.418117
35	216	0.459105
35	220	0.480067
35	233	0.575342
35	239	0.517876
36	37	0.547124
36	40	0.487054
36	43	0.472361
36	44	0.510193
36	48	0.593387
36	50	0.683612
36	58	0.787791
36	60	0.585486
36	67	0.491889
36	70	0.573811
36	71	0.562216
36	73	0.489753
36	74	0.452204
36	75	0.561977
36	78	0.645824
36	80	0.553488
36	81	0.760168
36	82	0.630566
36	83	0.571772
36	87	0.478543
36	91	0.517963
36	92	0.637052
36	93	0.461521
36	101	0.437185
36	103	0.556448
36	105	0.717591
36	109	0.472775
36	110	0.519444
36	113	0.501899
36	114	0.783089
36	116	0.464201
36	118	0.691768
36	121	0.514916
36	123	0.411891
36	124	0.518616
36	126	0.426715
36	128	0.499635
36	129	0.589273
36	131	0.488316
36	133	0.55499
36	134	0.536226
36	136	0.481003
36	138	0.622033
36	141	0.407233
36	144	0.688793
36	147	0.455078
36	148	0.64097
36	150	0.504598
36	151	0.453968
36	153	0.567571
36	154	0.729933
36	156	0.456928
36	157	0.806794
36	161	0.519313
36	163	0.746063
36	164	0.432723
36	170	0.657905
36	171	0.59946
36	172	0.529065
36	173	0.471229
36	175	0.644867
36	176	0.666961
36	177	0.51718
36	181	0.52445
36	188	0.661606
36	192	0.434617
36	195	0.597849
36	196	0.416376
36	197	0.526322
36	200	0.554968
36	201	0.633018
36	202	0.562412
36	204	0.408648
36	207	0.770094
36	209	0.537445
36	213	0.651332
36	215	0.632111
36	216	0.570706
36	220	0.508908
36	226	0.676451
36	230	0.548764
36	231	0.574145
36	233	0.652529
36	237	0.579826
36	239	0.559757
36	240	0.583331
37	43	0.430788
37	50	0.471417
37	58	0.439571
37	74	0.506288
37	82	0.521786
37	91	0.405929
37	92	0.419545
37	114	0.45003
37	127	0.416498
37	128	0.428524
37	138	0.45976
37	150	0.440714
37	153	0.441389
37	156	0.410794
37	157	0.46592
37	163	0.462459
37	172	0.416541
37	175	0.473071
37	201	0.443045
37	207	0.413592
37	215	0.474595
37	216	0.415366
37	226	0.408639
37	237	0.475291
38	46	0.524276
38	56	0.644279
38	77	0.618572
38	85	0.671749
38	95	0.549765
38	96	0.658624
38	97	0.508103
38	98	0.682415
38	106	0.61448
38	120	0.439114
38	155	0.443955
38	168	0.491756
38	194	0.445914
38	203	0.687444
38	210	0.423341
38	214	0.411979
38	229	0.504645
39	41	0.426258
39	50	0.409192
39	54	0.499766
39	55	0.450572
39	64	0.549548
39	77	0.546914
39	94	0.427716
39	97	0.567049
39	98	0.408909
39	142	0.605903
39	189	0.442714
39	193	0.444151
39	194	0.662738
39	208	0.417877
39	227	0.477781
39	232	0.571402
39	235	0.499265
40	50	0.492953
40	58	0.475996
40	60	0.439732
40	70	0.456811
40	80	0.433702
40	82	0.481786
40	83	0.547349
40	103	0.588185
40	114	0.557384
40	124	0.425714
40	134	0.548568
40	136	0.417333
40	144	0.497959
40	147	0.405274
40	148	0.510911
40	151	0.487272
40	153	0.423428
40	154	0.436684
40	156	0.428761
40	157	0.514263
40	163	0.443389
40	170	0.569508
40	173	0.420707
40	175	0.429762
40	177	0.409649
40	181	0.541037
40	188	0.417072
40	207	0.530937
40	209	0.478674
40	213	0.442736
40	216	0.415178
40	226	0.592125
40	231	0.526627
40	237	0.410694
41	52	0.409475
41	58	0.439275
41	60	0.437142
41	81	0.411696
41	86	0.424995
41	92	0.441451
41	104	0.426519
41	105	0.541429
41	118	0.467379
41	129	0.453075
41	157	0.441669
41	160	0.421317
41	161	0.401138
41	176	0.446871
41	192	0.407277
41	195	0.410302
41	201	0.408204
41	202	0.655097
41	220	0.40584
41	233	0.40732
42	90	0.436815
42	127	0.437512
42	138	0.429675
42	141	0.459975
42	156	0.573318
42	163	0.40436
42	175	0.472535
42	183	0.472883
42	208	0.412936
42	216	0.422449
42	235	0.46324
43	44	0.582678
43	58	0.436489
43	71	0.454316
43	75	0.472013
43	78	0.429305
43	81	0.412262
43	82	0.407669
43	83	0.467398
43	91	0.409105
43	92	0.419249
43	101	0.467311
43	113	0.431721
43	114	0.421491
43	121	0.462544
43	127	0.49132
43	128	0.403468
43	131	0.40682
43	138	0.457733
43	144	0.406515
43	157	0.468399
43	163	0.529587
43	166	0.425561
43	172	0.440951
43	175	0.45745
43	184	0.416114
43	200	0.443998
43	201	0.431343
43	207	0.491103
43	216	0.527127
43	226	0.465483
44	61	0.414591
44	78	0.405579
44	80	0.431569
44	82	0.443345
44	83	0.437142
44	103	0.466636
44	114	0.485225
44	127	0.403859
44	128	0.462479
44	144	0.418226
44	156	0.429915
44	157	0.462631
44	163	0.518834
44	166	0.430154
44	175	0.410063
44	207	0.483832
44	216	0.466136
44	226	0.404295
45	143	0.439797
45	189	0.590906
46	56	0.4652
46	59	0.542582
46	77	0.415679
46	85	0.761082
46	95	0.50129
46	96	0.772706
46	97	0.657187
46	98	0.504098
46	99	0.534093
46	104	0.448852
46	106	0.421055
46	120	0.572711
46	155	0.647979
46	168	0.656382
46	169	0.680543
46	180	0.469422
46	203	0.766589
46	210	0.616635
46	214	0.550767
46	221	0.526039
46	238	0.417116
47	54	0.47604
47	55	0.41163
47	64	0.423015
47	77	0.402902
47	97	0.571968
47	115	0.438905
47	142	0.401639
47	146	0.430981
47	194	0.499287
47	206	0.458495
48	50	0.520445
48	51	0.435814
48	58	0.565155
48	60	0.429153
48	70	0.553643
48	71	0.670008
48	75	0.505861
48	78	0.57199
48	81	0.641427
48	82	0.472905
48	83	0.509975
48	92	0.584245
48	100	0.515395
48	105	0.682981
48	110	0.422536
48	113	0.530501
48	114	0.56337
48	116	0.522429
48	118	0.457464
48	120	0.411894
48	121	0.550897
48	123	0.414547
48	126	0.47247
48	129	0.477977
48	131	0.512565
48	137	0.401726
48	138	0.481939
48	144	0.558146
48	147	0.500158
48	148	0.530741
48	154	0.526257
48	157	0.667026
48	161	0.483092
48	163	0.714761
48	171	0.465134
48	172	0.588141
48	175	0.587924
48	176	0.40288
48	181	0.551376
48	188	0.531829
48	193	0.549678
48	195	0.514219
48	196	0.465483
48	197	0.489339
48	200	0.527149
48	201	0.576488
48	202	0.579391
48	204	0.432505
48	205	0.454882
48	207	0.662629
48	209	0.441473
48	213	0.567745
48	215	0.476954
48	216	0.522143
48	230	0.494716
48	233	0.729781
48	239	0.516788
48	240	0.445892
49	227	0.411696
49	238	0.418748
50	58	0.736159
50	60	0.535203
50	67	0.413265
50	70	0.470916
50	73	0.464808
50	75	0.493062
50	78	0.573144
50	80	0.448286
50	81	0.619769
50	82	0.45129
50	83	0.486793
50	91	0.421556
50	92	0.524276
50	103	0.467398
50	105	0.672751
50	108	0.402815
50	109	0.444978
50	110	0.459366
50	114	0.762824
50	116	0.448289
50	118	0.624071
50	121	0.523209
50	123	0.463284
50	129	0.562412
50	133	0.529261
50	134	0.484115
50	136	0.507602
50	138	0.564001
50	144	0.480567
50	147	0.467746
50	148	0.655598
50	150	0.449462
50	153	0.486684
50	154	0.652355
50	157	0.778997
50	161	0.41729
50	163	0.597218
50	164	0.470924
50	170	0.725558
50	171	0.569791
50	172	0.448569
50	173	0.438643
50	175	0.520859
50	176	0.58542
50	177	0.426628
50	181	0.630914
50	188	0.534942
50	195	0.489405
50	197	0.49624
50	200	0.57889
50	201	0.634868
50	202	0.572795
50	207	0.618332
50	209	0.536727
50	213	0.400094
50	215	0.505643
50	216	0.514045
50	226	0.584811
50	230	0.401378
50	231	0.518029
50	232	0.404316
50	233	0.541516
50	237	0.517049
50	240	0.520031
51	61	0.430394
51	71	0.495891
51	80	0.515351
51	82	0.400268
51	123	0.416136
51	151	0.474364
51	163	0.552312
51	172	0.408169
51	175	0.523449
51	193	0.478913
51	207	0.462544
51	216	0.437664
51	230	0.410455
52	92	0.407843
52	129	0.430938
52	157	0.419619
52	187	0.419423
52	202	0.438513
54	97	0.564175
54	104	0.430372
54	146	0.417312
54	159	0.434007
54	189	0.489231
54	194	0.544585
54	225	0.407647
54	227	0.465352
54	232	0.523188
54	238	0.444455
55	64	0.778605
55	66	0.498503
55	97	0.441234
55	98	0.471621
55	115	0.459148
55	132	0.413002
55	142	0.540318
55	145	0.419989
55	183	0.460563
55	193	0.511716
55	194	0.582199
55	206	0.400137
55	227	0.550701
55	232	0.581393
55	242	0.471338
56	77	0.499483
56	85	0.624776
56	95	0.541973
56	96	0.624144
56	98	0.486553
56	106	0.523928
56	120	0.626564
56	155	0.45708
56	168	0.610844
56	169	0.515025
56	203	0.689033
56	205	0.663761
56	210	0.545804
56	221	0.570009
57	86	0.431504
57	159	0.465178
57	173	0.412501
57	178	0.40769
57	225	0.477716
58	60	0.598764
58	70	0.480145
58	71	0.478739
58	72	0.405209
58	73	0.414547
58	75	0.508734
58	78	0.606426
58	80	0.515264
58	81	0.760451
58	82	0.483462
58	83	0.526213
58	87	0.408757
58	91	0.435814
58	92	0.63986
58	93	0.456275
58	100	0.411086
58	101	0.46964
58	103	0.499461
58	105	0.694366
58	108	0.423711
58	109	0.519052
58	110	0.558233
58	113	0.449941
58	114	0.754617
58	116	0.506136
58	118	0.713274
58	120	0.43525
58	121	0.528477
58	128	0.453162
58	129	0.575494
58	131	0.408583
58	133	0.478499
58	134	0.496153
58	136	0.480741
58	138	0.556426
58	140	0.478412
58	144	0.686203
58	147	0.448069
58	148	0.655032
58	150	0.478717
58	153	0.528346
58	154	0.787247
58	157	0.783742
58	161	0.476192
58	163	0.642037
58	164	0.427346
58	170	0.758035
58	171	0.554293
58	172	0.462174
58	173	0.503989
58	175	0.488665
58	176	0.617571
58	177	0.423102
58	181	0.616286
58	188	0.641145
58	195	0.559408
58	197	0.519226
58	200	0.582786
58	201	0.662306
58	202	0.612825
58	204	0.48614
58	207	0.622708
58	209	0.529565
58	213	0.501573
58	215	0.49563
58	216	0.540231
58	220	0.467986
58	226	0.660234
58	230	0.479479
58	231	0.529565
58	233	0.608581
58	237	0.499309
58	239	0.556492
58	240	0.472557
59	85	0.496719
59	95	0.438665
59	96	0.52937
59	108	0.41372
59	155	0.534637
59	168	0.48516
59	169	0.570009
59	180	0.52408
59	192	0.437512
59	203	0.550092
59	205	0.419292
59	210	0.604205
59	221	0.518682
59	238	0.409649
60	75	0.45412
60	78	0.504751
60	80	0.491211
60	81	0.540231
60	83	0.583918
60	87	0.469205
60	91	0.443672
60	92	0.553052
60	103	0.484094
60	105	0.559931
60	110	0.415374
60	114	0.615089
60	118	0.501989
60	121	0.439579
60	129	0.581981
60	134	0.457015
60	136	0.407168
60	144	0.537336
60	148	0.483571
60	154	0.571533
60	157	0.611106
60	163	0.506819
60	170	0.507951
60	173	0.421055
60	176	0.502204
60	177	0.408583
60	181	0.663021
60	188	0.544302
60	200	0.488665
60	201	0.60693
60	202	0.463741
60	207	0.542212
60	213	0.511041
60	215	0.416114
60	216	0.486336
60	220	0.421121
60	226	0.56485
60	233	0.499374
61	65	0.438709
61	80	0.417094
61	82	0.406188
61	103	0.417442
61	141	0.415157
61	156	0.499157
61	163	0.446915
61	166	0.46028
61	175	0.491734
61	179	0.422906
61	184	0.432636
61	231	0.407843
61	235	0.500724
62	232	0.469226
64	66	0.47001
64	115	0.590971
64	142	0.637009
64	145	0.465635
64	183	0.53024
64	185	0.481068
64	189	0.403533
64	193	0.515569
64	194	0.699307
64	206	0.458278
64	223	0.402031
64	227	0.488338
64	232	0.609147
64	235	0.400246
64	242	0.509692
65	71	0.405165
65	90	0.498264
65	98	0.424103
65	127	0.441103
65	146	0.474755
65	156	0.451943
65	163	0.421926
65	166	0.430981
65	175	0.443236
65	179	0.481656
65	184	0.500506
65	193	0.429196
65	194	0.472709
65	207	0.411086
65	216	0.409214
65	235	0.581611
66	71	0.428826
66	72	0.434181
66	92	0.472949
66	97	0.414525
66	104	0.58788
66	111	0.426608
66	114	0.412588
66	115	0.488861
66	126	0.428826
66	140	0.42998
66	142	0.484202
66	144	0.524145
66	145	0.505991
66	147	0.541146
66	157	0.451421
66	159	0.42813
66	160	0.406515
66	169	0.482505
66	173	0.43638
66	178	0.405557
66	187	0.403816
66	188	0.405993
66	193	0.543801
66	194	0.516091
66	204	0.607405
66	206	0.499352
66	225	0.427107
66	226	0.427041
66	227	0.677779
66	230	0.413524
66	238	0.426018
66	242	0.579543
67	74	0.410163
67	114	0.485228
67	119	0.416334
67	128	0.435011
67	133	0.441116
67	157	0.450302
67	177	0.432627
67	226	0.496046
67	231	0.427479
68	164	0.53923
68	167	0.566635
68	180	0.663935
68	212	0.584223
68	220	0.423668
68	222	0.824577
68	223	0.411347
70	71	0.524268
70	75	0.418326
70	78	0.446243
70	81	0.491595
70	82	0.455951
70	92	0.564723
70	100	0.454329
70	105	0.576858
70	113	0.413777
70	114	0.494773
70	121	0.450498
70	129	0.43131
[truncated: 2,100 more rows]

## Sheet: Location0.5
1	4	0.803768
1	5	0.660931
1	7	0.579891
1	18	0.662847
1	19	0.620553
1	21	0.587075
1	27	0.554924
1	28	0.584092
1	36	0.724949
1	48	0.565525
1	50	0.623361
1	58	0.666547
1	60	0.53714
1	70	0.518021
1	75	0.667526
1	78	0.589904
1	81	0.65525
1	87	0.530131
1	92	0.544563
1	105	0.741231
1	114	0.604488
1	118	0.581059
1	121	0.598502
1	129	0.527585
1	131	0.520097
1	138	0.544672
1	144	0.519683
1	148	0.581567
1	153	0.569443
1	154	0.646848
1	157	0.708144
1	163	0.549504
1	170	0.581284
1	171	0.629107
1	172	0.585094
1	176	0.598589
1	181	0.52593
1	195	0.604858
1	197	0.546348
1	200	0.683482
1	201	0.604644
1	202	0.684135
1	207	0.58973
1	213	0.599047
1	215	0.578106
1	216	0.514764
1	220	0.536183
1	226	0.508342
1	233	0.662672
1	239	0.561106
1	240	0.552203
3	114	0.545325
3	147	0.55549
3	157	0.526736
3	188	0.538991
4	5	0.645041
4	7	0.567027
4	18	0.764413
4	19	0.548982
4	21	0.588076
4	27	0.6204
4	28	0.628715
4	35	0.60451
4	36	0.707252
4	48	0.693212
4	50	0.65144
4	58	0.669181
4	60	0.531677
4	70	0.553132
4	71	0.51644
4	75	0.50634
4	78	0.628215
4	81	0.704988
4	92	0.547415
4	105	0.763564
4	110	0.512696
4	113	0.521925
4	114	0.575799
4	116	0.543478
4	118	0.541508
4	121	0.674296
4	131	0.560736
4	138	0.638794
4	144	0.530088
4	148	0.609734
4	153	0.533636
4	154	0.676037
4	157	0.694823
4	163	0.586378
4	171	0.667374
4	172	0.648241
4	175	0.513349
4	176	0.55512
4	181	0.540906
4	188	0.552095
4	195	0.581241
4	200	0.689033
4	201	0.592128
4	202	0.690252
4	207	0.616482
4	213	0.548634
4	215	0.515068
4	220	0.519748
4	233	0.743015
4	239	0.600984
4	240	0.502574
5	7	0.557297
5	11	0.516214
5	18	0.635224
5	19	0.622664
5	21	0.5263
5	27	0.586117
5	28	0.501464
5	29	0.519117
5	35	0.565982
5	36	0.723055
5	43	0.523623
5	44	0.530828
5	48	0.587336
5	50	0.585703
5	58	0.619225
5	70	0.565071
5	71	0.527389
5	75	0.668441
5	78	0.616439
5	80	0.542038
5	81	0.606143
5	82	0.618028
5	83	0.545869
5	91	0.526104
5	92	0.523384
5	103	0.537315
5	105	0.658471
5	113	0.532373
5	114	0.635115
5	121	0.562695
5	127	0.526997
5	129	0.548982
5	134	0.51792
5	138	0.562369
5	144	0.579543
5	148	0.547893
5	151	0.517354
5	153	0.528499
5	154	0.637988
5	156	0.619638
5	157	0.717025
5	161	0.535356
5	163	0.704574
5	171	0.56041
5	172	0.591537
5	175	0.648241
5	181	0.563697
5	200	0.588424
5	201	0.544337
5	202	0.51065
5	207	0.700243
5	213	0.582308
5	215	0.549461
5	216	0.632742
5	226	0.541624
5	231	0.550179
5	233	0.655642
5	239	0.565264
6	183	0.501856
7	18	0.582308
7	19	0.549896
7	20	0.526474
7	21	0.556666
7	26	0.505208
7	27	0.574972
7	29	0.559125
7	36	0.711845
7	37	0.522537
7	48	0.658079
7	50	0.521751
7	58	0.565329
7	70	0.597983
7	71	0.625973
7	78	0.589295
7	81	0.590122
7	82	0.54317
7	92	0.534463
7	105	0.626865
7	114	0.593365
7	126	0.503401
7	128	0.537032
7	133	0.551899
7	134	0.535399
7	138	0.588707
7	144	0.612847
7	147	0.561237
7	148	0.511564
7	150	0.515417
7	153	0.559822
7	154	0.56707
7	157	0.709711
7	161	0.51755
7	163	0.618006
7	171	0.517789
7	175	0.671575
7	176	0.512282
7	188	0.557079
7	200	0.512152
7	201	0.590876
7	202	0.510018
7	207	0.717526
7	213	0.628258
7	216	0.504185
7	226	0.536901
7	230	0.524015
7	231	0.559452
7	233	0.608036
7	237	0.523971
7	239	0.5428
7	240	0.548525
8	11	0.50188
8	36	0.522295
8	40	0.510236
8	58	0.556666
8	103	0.520576
8	118	0.519849
8	154	0.551333
8	157	0.542125
8	170	0.642646
8	226	0.528281
8	231	0.518138
10	121	0.504664
11	20	0.507289
11	36	0.589766
11	73	0.508998
11	82	0.609868
11	83	0.510522
11	103	0.603948
11	157	0.575008
11	226	0.543238
13	95	0.54071
13	155	0.51139
15	46	0.586813
15	56	0.507232
15	59	0.687574
15	85	0.656665
15	95	0.509409
15	96	0.625777
15	155	0.628541
15	168	0.623992
15	169	0.655446
15	180	0.607732
15	203	0.634767
15	205	0.536618
15	210	0.870702
16	164	0.646521
16	178	0.680152
16	182	0.552726
16	238	0.526279
17	32	0.567854
17	33	0.510933
17	34	0.57495
17	79	0.551877
17	115	0.528042
17	117	0.752245
18	19	0.571293
18	21	0.670247
18	23	0.508669
18	27	0.729759
18	28	0.561955
18	29	0.500876
18	35	0.572273
18	36	0.685027
18	48	0.716873
18	50	0.548394
18	58	0.614588
18	60	0.52506
18	70	0.653555
18	71	0.589578
18	75	0.520619
18	78	0.683199
18	81	0.685963
18	82	0.513958
18	92	0.628367
18	105	0.783873
18	113	0.620139
18	114	0.536553
18	116	0.538504
18	118	0.535293
18	121	0.626299
18	131	0.580414
18	138	0.587575
18	144	0.604532
18	148	0.596043
18	154	0.608537
18	157	0.641841
18	161	0.617941
18	163	0.670073
18	171	0.57556
18	172	0.625341
18	175	0.571685
18	181	0.530088
18	188	0.577736
18	195	0.579739
18	196	0.600331
18	197	0.593561
18	200	0.609691
18	201	0.619947
18	202	0.668223
18	207	0.686464
18	209	0.5194
18	213	0.577976
18	215	0.546805
18	216	0.543366
18	233	0.753986
18	239	0.559387
19	20	0.554946
19	21	0.503619
19	27	0.505817
19	28	0.587619
19	36	0.672729
19	58	0.576648
19	70	0.530102
19	71	0.511324
19	75	0.526605
19	78	0.65673
19	81	0.566766
19	92	0.539753
19	105	0.594911
19	109	0.507058
19	114	0.516179
19	144	0.516549
19	154	0.592974
19	157	0.59145
19	163	0.694953
19	171	0.593975
19	172	0.507428
19	173	0.679107
19	181	0.500419
19	188	0.598655
19	200	0.534877
19	201	0.530515
19	202	0.535094
19	207	0.669028
19	209	0.525016
19	213	0.583265
19	220	0.606752
19	233	0.544019
20	21	0.537989
20	22	0.558647
20	23	0.581698
20	30	0.514437
20	36	0.536923
20	40	0.576779
20	48	0.559735
20	58	0.537271
20	60	0.512478
20	66	0.68999
20	70	0.506898
20	71	0.61744
20	78	0.51694
20	80	0.567397
20	81	0.504424
20	92	0.589121
20	104	0.583657
20	110	0.507689
20	114	0.560105
20	134	0.55216
20	140	0.624514
20	144	0.64996
20	146	0.57643
20	147	0.584245
20	151	0.509452
20	157	0.632459
20	163	0.607035
20	173	0.54428
20	175	0.571881
20	181	0.554184
20	188	0.534811
20	193	0.531829
20	204	0.545173
20	207	0.623927
20	213	0.597479
20	226	0.599656
20	227	0.548089
20	230	0.573144
20	231	0.508103
20	242	0.565111
21	28	0.563805
21	30	0.523906
21	36	0.656099
21	43	0.545085
21	48	0.52876
21	58	0.620509
21	66	0.513349
21	71	0.545782
21	75	0.534071
21	78	0.552334
21	81	0.704683
21	82	0.513675
21	83	0.539796
21	92	0.625407
21	101	0.560431
21	105	0.553988
21	113	0.581807
21	114	0.592277
21	124	0.561825
21	138	0.626582
21	144	0.655554
21	147	0.569356
21	154	0.535377
21	157	0.640557
21	161	0.512587
21	163	0.610017
21	172	0.501986
21	188	0.591972
21	195	0.6066
21	197	0.534768
21	200	0.580719
21	201	0.618466
21	202	0.549395
21	204	0.518638
21	207	0.700678
21	213	0.598742
21	216	0.530306
21	226	0.518812
21	233	0.607732
22	66	0.531677
22	104	0.575342
22	140	0.557057
22	146	0.573426
22	159	0.668528
22	162	0.577541
22	178	0.665372
22	189	0.539012
22	213	0.517376
22	225	0.694953
22	230	0.501921
22	243	0.514089
23	26	0.613848
23	28	0.526627
23	36	0.611933
23	40	0.52432
23	50	0.568594
23	58	0.683787
23	78	0.56596
23	80	0.528978
23	81	0.584092
23	91	0.500637
23	92	0.583918
23	109	0.552748
23	114	0.723207
23	118	0.567433
23	136	0.544062
23	144	0.62458
23	148	0.526692
23	150	0.507341
23	154	0.573187
23	157	0.624623
23	163	0.590122
23	170	0.553836
23	173	0.551398
23	176	0.540166
23	181	0.563544
23	188	0.655076
23	207	0.608232
23	209	0.514568
23	226	0.590927
23	231	0.534594
24	74	0.503183
24	226	0.54613
26	36	0.530175
26	58	0.513719
26	80	0.516527
26	92	0.53677
26	114	0.516113
26	144	0.535834
26	163	0.589795
26	207	0.501638
27	28	0.542365
27	36	0.654314
27	48	0.594563
27	50	0.550027
27	58	0.5465
27	70	0.614483
27	71	0.535617
27	75	0.513371
27	78	0.546849
27	81	0.596826
27	82	0.595216
27	92	0.652616
27	105	0.681262
27	114	0.574319
27	121	0.5529
27	134	0.511956
27	138	0.506536
27	144	0.544302
27	148	0.554337
27	153	0.574036
27	154	0.56633
27	157	0.640862
27	163	0.595694
27	171	0.548786
27	172	0.580261
27	175	0.632046
27	188	0.552269
27	197	0.5125
27	200	0.522165
27	207	0.585159
27	209	0.505926
27	215	0.566309
27	230	0.527258
27	233	0.607166
28	36	0.598241
28	50	0.57741
28	58	0.581676
28	60	0.505991
28	81	0.609451
28	83	0.519444
28	91	0.505752
28	92	0.551137
28	103	0.517245
28	105	0.659995
28	114	0.552269
28	121	0.506906
28	148	0.525734
28	154	0.544258
28	157	0.642211
28	163	0.518812
28	170	0.543518
28	173	0.516853
28	176	0.530327
28	188	0.650875
28	195	0.506666
28	200	0.598437
28	201	0.577859
28	202	0.594846
28	207	0.567702
28	209	0.541624
28	226	0.538947
28	233	0.552465
29	36	0.501703
29	82	0.526431
29	127	0.518616
29	151	0.586835
29	156	0.647435
29	161	0.538773
29	163	0.529478
29	172	0.533396
29	175	0.711322
29	184	0.500071
29	207	0.590688
29	216	0.545651
29	233	0.561737
30	58	0.506579
30	66	0.686007
30	92	0.500767
30	144	0.560671
30	204	0.627888
31	32	0.554753
31	211	0.557518
32	33	0.690665
32	34	0.545782
32	79	0.598611
32	117	0.788944
32	211	0.705423
33	79	0.520488
33	117	0.737225
33	174	0.567702
33	211	0.741622
34	79	0.625211
34	117	0.591058
35	78	0.512043
35	81	0.561498
35	105	0.561563
35	163	0.522752
35	172	0.503053
35	195	0.520118
35	200	0.53529
35	202	0.546021
35	207	0.553705
35	233	0.575342
35	239	0.517876
36	37	0.547124
36	44	0.510193
36	48	0.593387
36	50	0.683612
36	58	0.787791
36	60	0.585486
36	70	0.573811
36	71	0.562216
36	75	0.561977
36	78	0.645824
36	80	0.553488
36	81	0.760168
36	82	0.630566
36	83	0.571772
36	91	0.517963
36	92	0.637052
36	103	0.556448
36	105	0.717591
36	110	0.519444
36	113	0.501899
36	114	0.783089
36	118	0.691768
36	121	0.514916
36	124	0.518616
36	129	0.589273
36	133	0.55499
36	134	0.536226
36	138	0.622033
36	144	0.688793
36	148	0.64097
36	150	0.504598
36	153	0.567571
36	154	0.729933
36	157	0.806794
36	161	0.519313
36	163	0.746063
36	170	0.657905
36	171	0.59946
36	172	0.529065
36	175	0.644867
36	176	0.666961
36	177	0.51718
36	181	0.52445
36	188	0.661606
36	195	0.597849
36	197	0.526322
36	200	0.554968
36	201	0.633018
36	202	0.562412
36	207	0.770094
36	209	0.537445
36	213	0.651332
36	215	0.632111
36	216	0.570706
36	220	0.508908
36	226	0.676451
36	230	0.548764
36	231	0.574145
36	233	0.652529
36	237	0.579826
36	239	0.559757
36	240	0.583331
37	74	0.506288
37	82	0.521786
38	46	0.524276
38	56	0.644279
38	77	0.618572
38	85	0.671749
38	95	0.549765
38	96	0.658624
38	97	0.508103
38	98	0.682415
38	106	0.61448
38	203	0.687444
38	229	0.504645
39	64	0.549548
39	77	0.546914
39	97	0.567049
39	142	0.605903
39	194	0.662738
39	232	0.571402
40	83	0.547349
40	103	0.588185
40	114	0.557384
40	134	0.548568
40	148	0.510911
40	157	0.514263
40	170	0.569508
40	181	0.541037
40	207	0.530937
40	226	0.592125
40	231	0.526627
41	105	0.541429
41	202	0.655097
42	156	0.573318
43	44	0.582678
43	163	0.529587
43	216	0.527127
44	163	0.518834
45	189	0.590906
46	59	0.542582
46	85	0.761082
46	95	0.50129
46	96	0.772706
46	97	0.657187
46	98	0.504098
46	99	0.534093
46	120	0.572711
46	155	0.647979
46	168	0.656382
46	169	0.680543
46	203	0.766589
46	210	0.616635
46	214	0.550767
46	221	0.526039
47	97	0.571968
48	50	0.520445
48	58	0.565155
48	70	0.553643
48	71	0.670008
48	75	0.505861
48	78	0.57199
48	81	0.641427
48	83	0.509975
48	92	0.584245
48	100	0.515395
48	105	0.682981
48	113	0.530501
48	114	0.56337
48	116	0.522429
48	121	0.550897
48	131	0.512565
48	144	0.558146
48	147	0.500158
48	148	0.530741
48	154	0.526257
48	157	0.667026
48	163	0.714761
48	172	0.588141
48	175	0.587924
48	181	0.551376
48	188	0.531829
48	193	0.549678
48	195	0.514219
48	200	0.527149
48	201	0.576488
48	202	0.579391
48	207	0.662629
48	213	0.567745
48	216	0.522143
48	233	0.729781
48	239	0.516788
50	58	0.736159
50	60	0.535203
50	78	0.573144
50	81	0.619769
50	92	0.524276
50	105	0.672751
50	114	0.762824
50	118	0.624071
50	121	0.523209
50	129	0.562412
50	133	0.529261
50	136	0.507602
50	138	0.564001
50	148	0.655598
50	154	0.652355
50	157	0.778997
50	163	0.597218
50	170	0.725558
50	171	0.569791
50	175	0.520859
50	176	0.58542
50	181	0.630914
50	188	0.534942
50	200	0.57889
50	201	0.634868
50	202	0.572795
50	207	0.618332
50	209	0.536727
50	215	0.505643
50	216	0.514045
50	226	0.584811
50	231	0.518029
50	233	0.541516
50	237	0.517049
50	240	0.520031
51	80	0.515351
51	163	0.552312
51	175	0.523449
54	97	0.564175
54	194	0.544585
54	232	0.523188
55	64	0.778605
55	142	0.540318
55	193	0.511716
55	194	0.582199
55	227	0.550701
55	232	0.581393
56	85	0.624776
56	95	0.541973
56	96	0.624144
56	106	0.523928
56	120	0.626564
56	168	0.610844
56	169	0.515025
56	203	0.689033
56	205	0.663761
56	210	0.545804
56	221	0.570009
58	60	0.598764
58	75	0.508734
58	78	0.606426
58	80	0.515264
58	81	0.760451
58	83	0.526213
58	92	0.63986
58	105	0.694366
58	109	0.519052
58	110	0.558233
58	114	0.754617
58	116	0.506136
58	118	0.713274
58	121	0.528477
58	129	0.575494
58	138	0.556426
58	144	0.686203
58	148	0.655032
58	153	0.528346
58	154	0.787247
58	157	0.783742
58	163	0.642037
58	170	0.758035
58	171	0.554293
58	173	0.503989
58	176	0.617571
58	181	0.616286
58	188	0.641145
58	195	0.559408
58	197	0.519226
58	200	0.582786
58	201	0.662306
58	202	0.612825
58	207	0.622708
58	209	0.529565
58	213	0.501573
58	216	0.540231
58	226	0.660234
58	231	0.529565
58	233	0.608581
58	239	0.556492
59	96	0.52937
59	155	0.534637
59	169	0.570009
59	180	0.52408
59	203	0.550092
59	210	0.604205
59	221	0.518682
60	78	0.504751
60	81	0.540231
60	83	0.583918
60	92	0.553052
60	105	0.559931
60	114	0.615089
60	118	0.501989
60	129	0.581981
60	144	0.537336
60	154	0.571533
60	157	0.611106
60	163	0.506819
60	170	0.507951
60	176	0.502204
60	181	0.663021
60	188	0.544302
60	201	0.60693
60	207	0.542212
60	213	0.511041
60	226	0.56485
61	235	0.500724
64	115	0.590971
64	142	0.637009
64	183	0.53024
64	193	0.515569
64	194	0.699307
64	232	0.609147
64	242	0.509692
65	184	0.500506
65	235	0.581611
66	104	0.58788
66	144	0.524145
66	145	0.505991
66	147	0.541146
66	193	0.543801
66	194	0.516091
66	204	0.607405
66	227	0.677779
66	242	0.579543
68	164	0.53923
68	167	0.566635
68	180	0.663935
68	212	0.584223
68	222	0.824577
70	71	0.524268
70	92	0.564723
70	105	0.576858
70	157	0.504046
70	161	0.546253
70	163	0.529285
70	175	0.601553
70	200	0.500161
70	207	0.528948
70	213	0.535761
70	220	0.520382
70	233	0.607517
71	78	0.547785
71	82	0.560323
71	92	0.585072
71	113	0.576213
71	131	0.525473
71	134	0.504968
71	147	0.538425
71	151	0.62138
71	157	0.631632
71	163	0.703464
71	172	0.541472
71	175	0.656839
71	193	0.629499
71	207	0.656795
71	213	0.599547
71	215	0.589534
71	216	0.550353
71	227	0.515765
71	230	0.738379
71	233	0.656469
72	81	0.515765
72	86	0.503466
72	144	0.515134
73	134	0.515264
73	153	0.505534
73	171	0.550658
74	237	0.565111
75	82	0.526518
75	92	0.536357
75	105	0.539208
75	113	0.545194
75	114	0.524602
75	157	0.628802
75	163	0.58825
75	172	0.508669
75	181	0.550897
75	200	0.577279
75	201	0.500444
75	213	0.568094
75	216	0.558734
75	233	0.552486
77	97	0.633526
77	98	0.586922
77	106	0.602529
78	80	0.528956
78	81	0.651005
78	92	0.51028
78	105	0.647827
78	114	0.575037
78	116	0.5158
78	118	0.575498
78	121	0.574188
78	131	0.556034
78	133	0.584332
78	136	0.548176
78	138	0.607514
78	144	0.563805
78	154	0.658297
78	157	0.666808
78	163	0.650635
78	171	0.510367
78	175	0.540079
78	176	0.56596
78	181	0.50523
78	188	0.562565
78	200	0.601463
78	201	0.600095
78	202	0.53751
78	207	0.696651
78	209	0.530153
78	213	0.543714
78	216	0.533854
78	220	0.515199
78	233	0.570836
79	117	0.656948
79	211	0.586073
80	82	0.503379
80	92	0.516026
80	103	0.536357
80	114	0.567919
80	144	0.590906
80	154	0.55179
80	156	0.581916
80	157	0.60081
80	163	0.561454
80	175	0.569574
80	188	0.56707
80	207	0.642886
80	216	0.607188
80	226	0.586596
80	231	0.505491
81	83	0.505665
81	92	0.587205
81	105	0.734787
81	109	0.538207
81	114	0.619551
81	116	0.606549
81	118	0.669946
81	121	0.620879
81	131	0.512217
81	133	0.563348
81	136	0.531546
81	138	0.605403
81	144	0.666852
81	148	0.586008
81	154	0.70107
81	157	0.762562
81	161	0.525364
81	163	0.616395
81	170	0.601289
81	172	0.538142
81	181	0.561933
81	188	0.625189
81	195	0.568181
81	197	0.52075
81	200	0.568594
81	201	0.618967
81	202	0.657492
81	207	0.625363
81	209	0.563131
81	213	0.528325
81	216	0.500658
81	220	0.527498
81	233	0.645868
81	239	0.544171
82	83	0.556252
82	92	0.556818
82	113	0.508299
82	114	0.61067
82	124	0.511324
82	138	0.622751
82	144	0.548068
82	147	0.57138
82	150	0.558755
82	154	0.503836
82	156	0.582656
82	157	0.619443
82	163	0.589774
82	175	0.636726
82	201	0.550367
82	207	0.64367
82	213	0.601049
82	215	0.517506
82	216	0.52617
82	226	0.631502
83	92	0.522295
83	105	0.517136
83	114	0.59182
83	138	0.559887
83	144	0.578912
83	157	0.591232
83	163	0.587336
83	175	0.509039
83	181	0.539012
83	188	0.541233
83	201	0.519425
83	207	0.578977
83	213	0.549657
83	226	0.534659
85	95	0.713347
85	96	0.910341
85	97	0.615916
85	98	0.599395
85	120	0.581647
85	155	0.741448
85	168	0.734853
85	169	0.736006
85	203	0.886005
85	205	0.60586
85	210	0.718266
85	214	0.559104
85	221	0.582003
87	219	0.583418
90	156	0.523754
90	166	0.55967
90	235	0.500136
91	114	0.528368
91	157	0.534594
91	163	0.507624
91	188	0.625037
91	200	0.502008
91	207	0.585856
91	215	0.561955
91	226	0.506253
91	237	0.501747
92	105	0.654423
92	110	0.626495
92	114	0.717482
92	118	0.612502
92	129	0.526279
92	134	0.50499
92	144	0.573905
92	147	0.527171
92	148	0.550941
92	154	0.551877
92	157	0.720029
92	161	0.53664
92	163	0.62138
92	172	0.552595
92	175	0.529043
92	188	0.543758
92	195	0.542735
92	197	0.635071
92	200	0.522992
92	201	0.558377
92	202	0.534028
92	207	0.634092
92	209	0.521163
92	213	0.574863
92	215	0.513828
92	216	0.512173
92	226	0.654096
92	230	0.586879
92	233	0.625929
95	96	0.719354
95	155	0.629695
95	168	0.580066
95	169	0.542909
95	203	0.74554
95	205	0.533048
95	210	0.560497
95	214	0.552769
96	97	0.690034
96	98	0.656578
96	99	0.552095
96	106	0.520597
96	120	0.568717
96	155	0.710212
96	168	0.707513
96	169	0.730412
96	203	0.904507
96	205	0.540384
96	210	0.691209
96	214	0.553531
96	221	0.591406
97	98	0.623382
97	142	0.545107
97	146	0.530371
97	169	0.507885
97	189	0.525277
97	194	0.615873
97	203	0.567179
97	210	0.527541
98	203	0.527345
100	163	0.581284
100	172	0.53233
100	175	0.506797
100	213	0.506361
100	233	0.535464
101	128	0.505164
101	157	0.522208
101	163	0.501682
101	201	0.511197
101	216	0.531764
103	114	0.563
103	134	0.529217
103	144	0.503162
103	157	0.605316
103	163	0.528521
103	175	0.509561
103	177	0.511825
103	188	0.538229
103	207	0.540427
103	216	0.53233
103	226	0.643452
103	231	0.65882
104	146	0.536618
104	160	0.508604
104	169	0.519966
104	202	0.51496
104	227	0.579217
104	238	0.522273
105	113	0.514241
105	114	0.633112
105	116	0.524007
105	118	0.618793
105	121	0.678976
105	129	0.589621
105	131	0.556492
105	133	0.521903
105	138	0.533614
105	144	0.587706
105	148	0.698697
105	153	0.563805
105	154	0.711518
105	157	0.742602
105	161	0.539034
105	163	0.596173
105	170	0.520293
105	171	0.566983
105	172	0.544759
105	175	0.530741
105	176	0.605664
105	181	0.553575
105	188	0.573426
105	195	0.612695
105	197	0.571642
105	200	0.669268
105	201	0.670099
105	202	0.755379
105	207	0.643953
105	209	0.533005
105	215	0.582982
105	216	0.508865
105	220	0.607188
105	226	0.511324
105	233	0.666329
105	239	0.577149
106	203	0.541494
107	117	0.506623
107	211	0.577301
108	155	0.588968
108	168	0.595607
108	180	0.578977
109	118	0.551684
109	154	0.520249
109	170	0.528194
109	226	0.52162
109	231	0.50253
110	157	0.551942
110	163	0.559583
110	188	0.534572
110	230	0.502465
110	233	0.520771
111	227	0.505809
112	175	0.549613
113	138	0.525321
113	139	0.570183
113	157	0.555316
113	161	0.529805
113	163	0.553488
113	175	0.558647
113	200	0.587118
113	207	0.602377
113	213	0.576343
113	216	0.562282
113	233	0.603531
114	118	0.692508
114	129	0.53812
114	134	0.596413
114	136	0.568485
114	138	0.562652
114	144	0.638881
114	147	0.574275
114	148	0.645977
114	154	0.682219
114	157	0.815261
114	163	0.653443
114	164	0.51607
114	170	0.745802
114	175	0.568616
114	176	0.608994
114	177	0.51398
114	181	0.603792
114	188	0.689185
114	195	0.528782
114	197	0.532722
114	201	0.644533
114	202	0.504119
114	207	0.700286
114	209	0.564458
114	213	0.597675
114	215	0.587728
114	216	0.572229
114	226	0.761888
114	231	0.619464
114	233	0.539448
114	237	0.561389
115	206	0.653748
116	121	0.628349
116	154	0.503469
116	157	0.560881
116	200	0.566856
116	201	0.531204
116	207	0.568739
116	233	0.541377
117	174	0.51459
117	211	0.747434
118	133	0.512873
118	144	0.575639
118	148	0.549932
118	154	0.69733
118	157	0.676607
118	164	0.53218
118	170	0.6828
118	176	0.512209
118	200	0.501347
118	201	0.508217
118	202	0.609618
118	207	0.520578
118	215	0.521068
118	226	0.58637
119	170	0.536379
120	155	0.564646
120	168	0.745708
120	203	0.604426
120	205	0.58994
121	131	0.511782
121	138	0.572316
121	144	0.512739
121	154	0.599221
121	157	0.560475
121	163	0.544672
121	196	0.516636
121	200	0.561019
121	201	0.60558
121	202	0.521729
121	207	0.566613
121	233	0.578085
121	239	0.587619
124	150	0.511194
124	207	0.582068
126	175	0.527693
127	139	0.519139
127	175	0.641253
127	184	0.60377
127	208	0.500811
127	216	0.537467
128	157	0.54145
128	163	0.531807
129	144	0.502378
129	148	0.555751
129	154	0.534964
129	157	0.614131
129	163	0.571794
129	172	0.55647
129	175	0.552878
129	207	0.580109
129	215	0.558124
129	216	0.544367
129	226	0.559583
129	231	0.553335
129	233	0.50462
131	207	0.523862
131	220	0.504577
131	233	0.525647
133	154	0.517615
133	157	0.519226
133	200	0.55105
134	144	0.508451
134	147	0.525343
134	154	0.577736
134	157	0.564262
134	175	0.631066
134	207	0.666242
134	216	0.532656
134	226	0.622163
134	231	0.540688
134	239	0.549983
136	157	0.598024
136	181	0.505295
136	188	0.507145
138	144	0.545891
138	150	0.512761
138	153	0.501224
138	154	0.549069
138	157	0.639686
138	163	0.566962
138	171	0.554554
138	175	0.514328
138	188	0.526779
138	200	0.503749
138	201	0.601749
138	207	0.650309
138	213	0.619355
138	216	0.579391
138	233	0.58185
140	225	0.524646
141	172	0.501355
141	175	0.514655
141	184	0.506971
141	216	0.514198
142	189	0.519879
142	194	0.637466
144	147	0.54256
144	148	0.516418
144	154	0.688009
144	157	0.694649
144	163	0.585399
144	175	0.58431
144	176	0.54994
144	188	0.652768
144	202	0.521686
144	204	0.519531
144	207	0.667374
144	213	0.523601
144	226	0.611889
144	231	0.516396
144	233	0.500288
144	239	0.5295
145	147	0.51078
146	159	0.635376
146	189	0.586617
146	194	0.529805
146	225	0.535464
146	235	0.603335
146	243	0.525451
147	157	0.612194
147	163	0.554859
147	175	0.519269
147	188	0.54687
147	207	0.564328
147	216	0.580784
147	226	0.598764
147	233	0.508299
148	154	0.659494
148	157	0.716633
148	170	0.549221
148	181	0.664871
148	202	0.527715
148	207	0.562608
148	215	0.526039
148	226	0.563152
148	233	0.54613
150	154	0.523536
150	156	0.571163
150	157	0.543214
150	163	0.504751
150	207	0.629891
150	215	0.531524
150	226	0.533026
150	231	0.62939
151	156	0.517267
151	163	0.531546
151	175	0.625385
151	207	0.566744
151	235	0.537837
153	154	0.56411
153	157	0.551572
153	171	0.632438
153	175	0.518094
153	176	0.537881
153	226	0.527106
154	157	0.725885
154	163	0.533897
154	170	0.618071
154	171	0.570619
154	176	0.598437
154	181	0.558146
154	188	0.655794
154	195	0.576365
154	200	0.533571
154	201	0.593216
154	202	0.598132
154	207	0.662912
154	209	0.514872
154	215	0.532373
154	216	0.508364
154	226	0.605642
154	231	0.576039
154	233	0.552443
154	239	0.57913
155	168	0.782414
155	169	0.650374
155	180	0.546109
155	203	0.733133
155	205	0.502922
155	210	0.65144
155	214	0.691819
155	221	0.527389
156	163	0.612238
156	175	0.606709
156	207	0.597088
156	215	0.52001
156	216	0.533832
156	231	0.570227
156	235	0.535073
157	161	0.572186
157	163	0.725057
157	170	0.682045
157	171	0.587379
157	172	0.580936
157	175	0.65488
157	176	0.61892
157	177	0.501703
157	181	0.677082
157	188	0.660909
157	195	0.563762
157	197	0.543409
157	200	0.595433
157	201	0.709215
157	202	0.617766
157	207	0.771052
157	209	0.595586
157	213	0.65181
157	215	0.600374
157	216	0.657666
157	226	0.732219
157	230	0.573927
157	231	0.64811
157	233	0.71191
157	237	0.592691
157	239	0.505055
159	162	0.635376
159	189	0.529195
159	225	0.702898
159	243	0.519139
160	162	0.513915
160	202	0.510323
160	225	0.518399
161	163	0.557863
161	172	0.542843
161	175	0.523862
161	201	0.551749
161	207	0.570727
161	213	0.614305
161	233	0.616243
162	178	0.514698
162	189	0.530306
162	225	0.639926
163	171	0.515134
163	172	0.678192
163	175	0.701483
163	181	0.577236
163	188	0.65279
163	197	0.502879
163	200	0.546892
163	201	0.657082
163	207	0.797608
163	209	0.548612
163	213	0.607231
163	215	0.542103
163	216	0.663369
163	226	0.546653
163	230	0.638837
163	231	0.518616
163	233	0.721074
164	178	0.608602
164	180	0.5258
164	182	0.511499
164	192	0.58653
164	202	0.577628
164	220	0.616656
164	222	0.513523
164	238	0.508712
166	191	0.540623
167	212	0.549526
167	222	0.558255
168	169	0.606143
168	180	0.522665
168	203	0.776733
168	205	0.502661
168	210	0.637248
168	214	0.587336
168	221	0.641558
169	192	0.585181
169	203	0.766176
169	205	0.571054
169	210	0.630283
169	221	0.585116
169	238	0.673991
170	176	0.502422
170	181	0.543431
170	188	0.52038
170	201	0.542542
170	202	0.523275
170	215	0.518399
170	226	0.637183
170	231	0.532177
171	172	0.588119
171	175	0.52273
171	201	0.509085
171	202	0.51496
171	207	0.588011
171	213	0.530262
171	233	0.579783
171	240	0.582547
172	175	0.575298
172	200	0.543192
172	201	0.523071
172	207	0.550201
172	213	0.559844
172	216	0.51533
172	230	0.56546
172	233	0.624318
173	188	0.503967
173	204	0.558189
173	207	0.510693
175	177	0.518616
175	184	0.521207
175	200	0.515395
175	201	0.527598
175	207	0.754334
175	213	0.516679
175	215	0.577149
175	216	0.606948
175	226	0.556862
175	231	0.559191
175	233	0.626604
176	188	0.651941
176	195	0.518682
176	202	0.61202
176	207	0.501921
176	226	0.500702
176	238	0.514829
177	226	0.515808
178	182	0.601811
178	238	0.525255
180	210	0.5763
180	212	0.680108
180	214	0.554337
180	222	0.622446
181	188	0.509213
181	200	0.513283
181	201	0.583791
181	202	0.517746
181	207	0.530393
181	213	0.527889
181	233	0.551986
182	187	0.529217
183	193	0.575386
188	195	0.512979
188	201	0.514669
188	202	0.53246
188	207	0.661388
188	209	0.619094
188	226	0.55573
191	235	0.511107
192	202	0.623513
192	238	0.588381
193	227	0.718832
193	230	0.543627
194	227	0.568855
194	232	0.588751
194	235	0.591472
195	197	0.579695
195	200	0.51755
195	201	0.512786
195	202	0.631371
195	207	0.57667
195	216	0.532569
195	233	0.563979
195	239	0.520641
196	233	0.52112
197	201	0.525857
197	202	0.566613
197	226	0.52802
197	233	0.504141
200	201	0.565909
200	202	0.538925
200	207	0.601354
200	216	0.530567
200	220	0.504402
200	233	0.649024
201	202	0.612622
201	207	0.646133
201	213	0.613884
201	216	0.59092
201	226	0.555047
201	233	0.646905
202	220	0.567179
202	233	0.531111
202	238	0.521969
203	205	0.570684
203	210	0.708101
203	214	0.523732
203	221	0.608341
204	242	0.511934
205	210	0.543105
205	221	0.516004
207	209	0.553988
207	213	0.637967
207	215	0.60512
207	216	0.714108
207	226	0.682285
207	231	0.662368
207	233	0.738705
207	239	0.556622
207	240	0.524363
209	226	0.539339
212	222	0.547654
213	226	0.563
213	230	0.569574
213	233	0.627322
215	216	0.531546
215	226	0.530806
216	226	0.572491
216	231	0.529391
216	233	0.623796
220	239	0.509953
226	231	0.70612
226	237	0.565416
227	230	0.516723
227	232	0.517376
230	233	0.572077
231	237	0.563087
233	239	0.575103
235	236	0.515003
235	242	0.524755

## Sheet: Location0.6
1	4	0.803768
1	5	0.660931
1	18	0.662847
1	19	0.620553
1	36	0.724949
1	50	0.623361
1	58	0.666547
1	75	0.667526
1	81	0.65525
1	105	0.741231
1	114	0.604488
1	154	0.646848
1	157	0.708144
1	171	0.629107
1	195	0.604858
1	200	0.683482
1	201	0.604644
1	202	0.684135
1	233	0.662672
4	5	0.645041
4	18	0.764413
4	27	0.6204
4	28	0.628715
4	35	0.60451
4	36	0.707252
4	48	0.693212
4	50	0.65144
4	58	0.669181
4	78	0.628215
4	81	0.704988
4	105	0.763564
4	121	0.674296
4	138	0.638794
4	148	0.609734
4	154	0.676037
4	157	0.694823
4	171	0.667374
4	172	0.648241
4	200	0.689033
4	202	0.690252
4	207	0.616482
4	233	0.743015
4	239	0.600984
5	18	0.635224
5	19	0.622664
5	36	0.723055
5	58	0.619225
5	75	0.668441
5	78	0.616439
5	81	0.606143
5	82	0.618028
5	105	0.658471
5	114	0.635115
5	154	0.637988
5	156	0.619638
5	157	0.717025
5	163	0.704574
5	175	0.648241
5	207	0.700243
5	216	0.632742
5	233	0.655642
7	36	0.711845
7	48	0.658079
7	71	0.625973
7	105	0.626865
7	144	0.612847
7	157	0.709711
7	163	0.618006
7	175	0.671575
7	207	0.717526
7	213	0.628258
7	233	0.608036
8	170	0.642646
11	82	0.609868
11	103	0.603948
15	59	0.687574
15	85	0.656665
15	96	0.625777
15	155	0.628541
15	168	0.623992
15	169	0.655446
15	180	0.607732
15	203	0.634767
15	210	0.870702
16	164	0.646521
16	178	0.680152
17	117	0.752245
18	21	0.670247
18	27	0.729759
18	36	0.685027
18	48	0.716873
18	58	0.614588
18	70	0.653555
18	78	0.683199
18	81	0.685963
18	92	0.628367
18	105	0.783873
18	113	0.620139
18	121	0.626299
18	144	0.604532
18	154	0.608537
18	157	0.641841
18	161	0.617941
18	163	0.670073
18	172	0.625341
18	196	0.600331
18	200	0.609691
18	201	0.619947
18	202	0.668223
18	207	0.686464
18	233	0.753986
19	36	0.672729
19	78	0.65673
19	163	0.694953
19	173	0.679107
19	207	0.669028
19	220	0.606752
20	66	0.68999
20	71	0.61744
20	140	0.624514
20	144	0.64996
20	157	0.632459
20	163	0.607035
20	207	0.623927
21	36	0.656099
21	58	0.620509
21	81	0.704683
21	92	0.625407
21	138	0.626582
21	144	0.655554
21	157	0.640557
21	163	0.610017
21	195	0.6066
21	201	0.618466
21	207	0.700678
21	233	0.607732
22	159	0.668528
22	178	0.665372
22	225	0.694953
23	26	0.613848
23	36	0.611933
23	58	0.683787
23	114	0.723207
23	144	0.62458
23	157	0.624623
23	188	0.655076
23	207	0.608232
27	36	0.654314
27	70	0.614483
27	92	0.652616
27	105	0.681262
27	157	0.640862
27	175	0.632046
27	233	0.607166
28	81	0.609451
28	105	0.659995
28	157	0.642211
28	188	0.650875
29	156	0.647435
29	175	0.711322
30	66	0.686007
30	204	0.627888
32	33	0.690665
32	117	0.788944
32	211	0.705423
33	117	0.737225
33	211	0.741622
34	79	0.625211
36	50	0.683612
36	58	0.787791
36	78	0.645824
36	81	0.760168
36	82	0.630566
36	92	0.637052
36	105	0.717591
36	114	0.783089
36	118	0.691768
36	138	0.622033
36	144	0.688793
36	148	0.64097
36	154	0.729933
36	157	0.806794
36	163	0.746063
36	170	0.657905
36	175	0.644867
36	176	0.666961
36	188	0.661606
36	201	0.633018
36	207	0.770094
36	213	0.651332
36	215	0.632111
36	226	0.676451
36	233	0.652529
38	56	0.644279
38	77	0.618572
38	85	0.671749
38	96	0.658624
38	98	0.682415
38	106	0.61448
38	203	0.687444
39	142	0.605903
39	194	0.662738
41	202	0.655097
46	85	0.761082
46	96	0.772706
46	97	0.657187
46	155	0.647979
46	168	0.656382
46	169	0.680543
46	203	0.766589
46	210	0.616635
48	71	0.670008
48	81	0.641427
48	105	0.682981
48	157	0.667026
48	163	0.714761
48	207	0.662629
48	233	0.729781
50	58	0.736159
50	81	0.619769
50	105	0.672751
50	114	0.762824
50	118	0.624071
50	148	0.655598
50	154	0.652355
50	157	0.778997
50	170	0.725558
50	181	0.630914
50	201	0.634868
50	207	0.618332
55	64	0.778605
56	85	0.624776
56	96	0.624144
56	120	0.626564
56	168	0.610844
56	203	0.689033
56	205	0.663761
58	78	0.606426
58	81	0.760451
58	92	0.63986
58	105	0.694366
58	114	0.754617
58	118	0.713274
58	144	0.686203
58	148	0.655032
58	154	0.787247
58	157	0.783742
58	163	0.642037
58	170	0.758035
58	176	0.617571
58	181	0.616286
58	188	0.641145
58	201	0.662306
58	202	0.612825
58	207	0.622708
58	226	0.660234
58	233	0.608581
59	210	0.604205
60	114	0.615089
60	157	0.611106
60	181	0.663021
60	201	0.60693
64	142	0.637009
64	194	0.699307
64	232	0.609147
66	204	0.607405
66	227	0.677779
68	180	0.663935
68	222	0.824577
70	175	0.601553
70	233	0.607517
71	151	0.62138
71	157	0.631632
71	163	0.703464
71	175	0.656839
71	193	0.629499
71	207	0.656795
71	230	0.738379
71	233	0.656469
75	157	0.628802
77	97	0.633526
77	106	0.602529
78	81	0.651005
78	105	0.647827
78	138	0.607514
78	154	0.658297
78	157	0.666808
78	163	0.650635
78	200	0.601463
78	201	0.600095
78	207	0.696651
79	117	0.656948
80	157	0.60081
80	207	0.642886
80	216	0.607188
81	105	0.734787
81	114	0.619551
81	116	0.606549
81	118	0.669946
81	121	0.620879
81	138	0.605403
81	144	0.666852
81	154	0.70107
81	157	0.762562
81	163	0.616395
81	170	0.601289
81	188	0.625189
81	201	0.618967
81	202	0.657492
81	207	0.625363
81	233	0.645868
82	114	0.61067
82	138	0.622751
82	157	0.619443
82	175	0.636726
82	207	0.64367
82	213	0.601049
82	226	0.631502
85	95	0.713347
85	96	0.910341
85	97	0.615916
85	155	0.741448
85	168	0.734853
85	169	0.736006
85	203	0.886005
85	205	0.60586
85	210	0.718266
91	188	0.625037
92	105	0.654423
92	110	0.626495
92	114	0.717482
92	118	0.612502
92	157	0.720029
92	163	0.62138
92	197	0.635071
92	207	0.634092
92	226	0.654096
92	233	0.625929
95	96	0.719354
95	155	0.629695
95	203	0.74554
96	97	0.690034
96	98	0.656578
96	155	0.710212
96	168	0.707513
96	169	0.730412
96	203	0.904507
96	210	0.691209
97	98	0.623382
97	194	0.615873
103	157	0.605316
103	226	0.643452
103	231	0.65882
105	114	0.633112
105	118	0.618793
105	121	0.678976
105	148	0.698697
105	154	0.711518
105	157	0.742602
105	176	0.605664
105	195	0.612695
105	200	0.669268
105	201	0.670099
105	202	0.755379
105	207	0.643953
105	220	0.607188
105	233	0.666329
113	207	0.602377
113	233	0.603531
114	118	0.692508
114	144	0.638881
114	148	0.645977
114	154	0.682219
114	157	0.815261
114	163	0.653443
114	170	0.745802
114	176	0.608994
114	181	0.603792
114	188	0.689185
114	201	0.644533
114	207	0.700286
114	226	0.761888
114	231	0.619464
115	206	0.653748
116	121	0.628349
117	211	0.747434
118	154	0.69733
118	157	0.676607
118	170	0.6828
118	202	0.609618
120	168	0.745708
120	203	0.604426
121	201	0.60558
127	175	0.641253
127	184	0.60377
129	157	0.614131
134	175	0.631066
134	207	0.666242
134	226	0.622163
138	157	0.639686
138	201	0.601749
138	207	0.650309
138	213	0.619355
142	194	0.637466
144	154	0.688009
144	157	0.694649
144	188	0.652768
144	207	0.667374
144	226	0.611889
146	159	0.635376
146	235	0.603335
147	157	0.612194
148	154	0.659494
148	157	0.716633
148	181	0.664871
150	207	0.629891
150	231	0.62939
151	175	0.625385
153	171	0.632438
154	157	0.725885
154	170	0.618071
154	188	0.655794
154	207	0.662912
154	226	0.605642
155	168	0.782414
155	169	0.650374
155	203	0.733133
155	210	0.65144
155	214	0.691819
156	163	0.612238
156	175	0.606709
157	163	0.725057
157	170	0.682045
157	175	0.65488
157	176	0.61892
157	181	0.677082
157	188	0.660909
157	201	0.709215
157	202	0.617766
157	207	0.771052
157	213	0.65181
157	215	0.600374
157	216	0.657666
157	226	0.732219
157	231	0.64811
157	233	0.71191
159	162	0.635376
159	225	0.702898
161	213	0.614305
161	233	0.616243
162	225	0.639926
163	172	0.678192
163	175	0.701483
163	188	0.65279
163	201	0.657082
163	207	0.797608
163	213	0.607231
163	216	0.663369
163	230	0.638837
163	233	0.721074
164	178	0.608602
164	220	0.616656
168	169	0.606143
168	203	0.776733
168	210	0.637248
168	221	0.641558
169	203	0.766176
169	210	0.630283
169	238	0.673991
170	226	0.637183
172	233	0.624318
175	207	0.754334
175	216	0.606948
175	233	0.626604
176	188	0.651941
176	202	0.61202
178	182	0.601811
180	212	0.680108
180	222	0.622446
188	207	0.661388
188	209	0.619094
192	202	0.623513
193	227	0.718832
195	202	0.631371
200	207	0.601354
200	233	0.649024
201	202	0.612622
201	207	0.646133
201	213	0.613884
201	233	0.646905
203	210	0.708101
203	221	0.608341
207	213	0.637967
207	215	0.60512
207	216	0.714108
207	226	0.682285
207	231	0.662368
207	233	0.738705
213	233	0.627322
216	233	0.623796
226	231	0.70612

## Sheet: Location0.7
1	4	0.803768
1	36	0.724949
1	105	0.741231
1	157	0.708144
4	18	0.764413
4	36	0.707252
4	81	0.704988
4	105	0.763564
4	233	0.743015
5	36	0.723055
5	157	0.717025
5	163	0.704574
5	207	0.700243
7	36	0.711845
7	157	0.709711
7	207	0.717526
15	210	0.870702
17	117	0.752245
18	27	0.729759
18	48	0.716873
18	105	0.783873
18	233	0.753986
21	81	0.704683
21	207	0.700678
23	114	0.723207
29	175	0.711322
32	117	0.788944
32	211	0.705423
33	117	0.737225
33	211	0.741622
36	58	0.787791
36	81	0.760168
36	105	0.717591
36	114	0.783089
36	154	0.729933
36	157	0.806794
36	163	0.746063
36	207	0.770094
46	85	0.761082
46	96	0.772706
46	203	0.766589
48	163	0.714761
48	233	0.729781
50	58	0.736159
50	114	0.762824
50	157	0.778997
50	170	0.725558
55	64	0.778605
58	81	0.760451
58	114	0.754617
58	118	0.713274
58	154	0.787247
58	157	0.783742
58	170	0.758035
68	222	0.824577
71	163	0.703464
71	230	0.738379
81	105	0.734787
81	154	0.70107
81	157	0.762562
85	95	0.713347
85	96	0.910341
85	155	0.741448
85	168	0.734853
85	169	0.736006
85	203	0.886005
85	210	0.718266
92	114	0.717482
92	157	0.720029
95	96	0.719354
95	203	0.74554
96	155	0.710212
96	168	0.707513
96	169	0.730412
96	203	0.904507
105	154	0.711518
105	157	0.742602
105	202	0.755379
114	157	0.815261
114	170	0.745802
114	207	0.700286
114	226	0.761888
117	211	0.747434
120	168	0.745708
148	157	0.716633
154	157	0.725885
155	168	0.782414
155	203	0.733133
157	163	0.725057
157	201	0.709215
157	207	0.771052
157	226	0.732219
157	233	0.71191
159	225	0.702898
163	175	0.701483
163	207	0.797608
163	233	0.721074
168	203	0.776733
169	203	0.766176
175	207	0.754334
193	227	0.718832
203	210	0.708101
207	216	0.714108
207	233	0.738705
226	231	0.70612

## Sheet: Location0.8
1	4	0.803768
15	210	0.870702
36	157	0.806794
68	222	0.824577
85	96	0.910341
85	203	0.886005
96	203	0.904507
114	157	0.815261

## Sheet: Location0.9
85	96	0.910341
96	203	0.904507

## Sheet: Location1
0	0	0
