# Supplementary material for: Network Structure Analysis Identifying Key Genes of Autism and Its Mechanism
Source: Comput Math Methods Med. 2020 Mar 23;2020:3753080. doi: 10.1155/2020/3753080 (PMC7125446; doi:10.1155/2020/3753080)
Supplement: Supplementary Materials — Data1: sheet1 is about 244 genes related to ASD; sheet2 is about the expression profile of 244 genes related to ASD in the control group (C); sheet3 is about the expression profile of 244 genes related to ASD in the experimental group (E). Data2: sheet1 and sheet2 are the Spearman correlation coefficients of C and E, respectively. Data3: the Spearman correlation networks of C at different threshold (0.1–1) (sheet1–sheet10). Data4: the Spearman correlation networks of E at different threshold (0.1–1) (sheet1–sheet10). Data5: comparison of node degree of C and E 's correlation networks under different thresholds (sheet1–sheet4). Data6: analysis of structural key genes (sheet1–sheet5). [file 3753080.f1.zip › 3753080.f1/ProcessedData/Data5-Comparison of Node Degree of C and E under Different Thresholds.xls]

## Sheet: comparison of degree C and E
	0.1E	0.1C	0.1E-C	0.2E	0.2C	0.2E-C	0.3E	0.3C	0.3E-C	0.4E	0.4C	0.4E-C	0.5E	0.5C	0.5E-C	0.6E	0.6C	0.6E-C	0.7E	0.7C	0.7E-C	0.8E	0.8C	0.8E-C	0.9E	0.9C	0.9E-C
G1	206	196	10	168	157	11	123	124	-1	77	89	-12	51	40	11	19	5	14	4	0	4	1	0	1	0	0	0
G2	126	106	20	39	24	15	4	5	-1	2	1	1	0	0	0	0	0	0	0	0	0	0	0	0	0	0	0
G3	203	185	18	151	127	24	86	74	12	35	29	6	4	4	0	0	0	0	0	0	0	0	0	0	0	0	0
G4	206	191	15	163	153	10	127	110	17	82	75	7	52	56	-4	25	21	4	6	3	3	1	0	1	0	0	0
G5	196	207	-11	159	166	-7	127	132	-5	100	96	4	60	50	10	20	22	-2	4	4	0	0	0	0	0	0	0
G6	123	118	5	48	43	5	15	11	4	5	1	4	1	0	1	0	0	0	0	0	0	0	0	0	0	0	0
G7	204	203	1	165	170	-5	135	139	-4	93	102	-9	54	62	-8	11	27	-16	3	3	0	0	0	0	0	0	0
G8	201	194	7	145	140	5	86	68	18	37	21	16	11	4	7	1	0	1	0	0	0	0	0	0	0	0	0
G9	136	187	-51	65	110	-45	21	49	-28	5	9	-4	0	3	-3	0	0	0	0	0	0	0	0	0	0	0	0
G10	178	199	-21	116	159	-43	56	116	-60	25	74	-49	1	37	-36	0	8	-8	0	0	0	0	0	0	0	0	0
G11	194	202	-8	149	155	-6	99	122	-23	49	81	-32	10	33	-23	2	7	-5	0	0	0	0	0	0	0	0	0
G12	109	127	-18	39	49	-10	3	6	-3	1	2	-1	0	0	0	0	0	0	0	0	0	0	0	0	0	0	0
G13	137	142	-5	69	76	-7	32	39	-7	10	25	-15	2	20	-18	0	6	-6	0	1	-1	0	0	0	0	0	0
G14	169	187	-18	92	124	-32	37	64	-27	5	20	-15	0	5	-5	0	0	0	0	0	0	0	0	0	0	0	0
G15	129	127	2	59	60	-1	33	37	-4	22	30	-8	13	21	-8	9	15	-6	1	5	-4	1	1	0	0	0	0
G16	182	128	54	104	52	52	51	24	27	11	6	5	4	2	2	2	1	1	0	0	0	0	0	0	0	0	0
G17	141	119	22	67	37	30	19	9	10	9	3	6	6	1	5	1	0	1	1	0	1	0	0	0	0	0	0
G18	199	202	-3	160	150	10	124	106	18	82	84	-2	55	53	2	27	18	9	5	5	0	0	0	0	0	0	0
G19	208	192	16	168	155	13	128	121	7	94	81	13	37	45	-8	8	11	-3	0	0	0	0	0	0	0	0	0
G20	212	203	9	175	147	28	143	85	58	94	44	50	43	9	34	7	0	7	0	0	0	0	0	0	0	0	0
G21	198	197	1	165	158	7	128	125	3	80	89	-9	46	47	-1	13	17	-4	2	1	1	0	0	0	0	0	0
G22	195	202	-7	150	163	-13	92	115	-23	40	61	-21	13	14	-1	3	3	0	0	1	-1	0	0	0	0	0	0
G23	201	211	-10	162	170	-8	115	115	0	74	61	13	32	19	13	8	1	7	1	0	1	0	0	0	0	0	0
G24	183	208	-25	128	175	-47	70	149	-79	25	87	-62	2	45	-43	0	10	-10	0	1	-1	0	0	0	0	0	0
G25	118	138	-20	32	62	-30	2	24	-22	0	3	-3	0	1	-1	0	0	0	0	0	0	0	0	0	0	0	0
G26	193	192	1	149	155	-6	100	122	-22	41	72	-31	10	25	-15	1	3	-2	0	0	0	0	0	0	0	0	0
G27	191	203	-12	158	158	0	114	131	-17	77	94	-17	40	49	-9	9	13	-4	1	0	1	0	0	0	0	0	0
G28	200	177	23	164	124	40	112	80	32	73	43	30	36	16	20	5	1	4	0	0	0	0	0	0	0	0	0
G29	188	204	-16	146	163	-17	101	129	-28	54	94	-40	16	49	-33	2	17	-15	1	2	-1	0	0	0	0	0	0
G30	194	197	-3	133	142	-9	75	72	3	29	33	-4	7	12	-5	2	1	1	0	0	0	0	0	0	0	0	0
G31	114	154	-40	46	76	-30	14	21	-7	4	2	2	2	0	2	0	0	0	0	0	0	0	0	0	0	0	0
G32	100	99	1	35	30	5	15	15	0	10	2	8	7	1	6	3	0	3	2	0	2	0	0	0	0	0	0
G33	120	117	3	48	40	8	19	11	8	13	3	10	6	2	4	3	1	2	2	0	2	0	0	0	0	0	0
G34	147	112	35	61	32	29	19	4	15	8	0	8	4	0	4	1	0	1	0	0	0	0	0	0	0	0	0
G35	198	181	17	155	131	24	103	95	8	51	61	-10	14	31	-17	1	10	-9	0	0	0	0	0	0	0	0	0
G36	207	209	-2	171	171	0	139	134	5	104	109	-5	77	65	12	34	28	6	12	8	4	1	0	1	0	0	0
G37	172	196	-24	123	142	-19	82	88	-6	31	43	-12	4	7	-3	0	0	0	0	0	0	0	0	0	0	0	0
G38	148	138	10	73	73	0	34	47	-13	17	30	-13	11	21	-10	7	13	-6	0	10	-10	0	6	-6	0	1	-1
G39	149	130	19	82	54	28	37	20	17	17	12	5	6	1	5	2	0	2	0	0	0	0	0	0	0	0	0
G40	197	188	9	156	134	22	98	84	14	45	37	8	14	4	10	0	0	0	0	0	0	0	0	0	0	0	0
G41	190	174	16	130	98	32	64	52	12	25	23	2	2	6	-4	1	2	-1	0	1	-1	0	0	0	0	0	0
G42	177	195	-18	113	151	-38	61	112	-51	13	71	-58	1	26	-25	0	4	-4	0	0	0	0	0	0	0	0	0
G43	191	200	-9	134	164	-30	81	125	-44	35	89	-54	5	41	-36	0	4	-4	0	0	0	0	0	0	0	0	0
G44	194	206	-12	138	150	-12	65	105	-40	23	48	-25	4	10	-6	0	1	-1	0	0	0	0	0	0	0	0	0
G45	124	160	-36	47	91	-44	13	41	-28	2	16	-14	1	8	-7	0	1	-1	0	0	0	0	0	0	0	0	0
G46	161	151	10	83	87	-4	45	46	-1	24	30	-6	17	22	-5	8	16	-8	3	11	-8	0	1	-1	0	0	0
G47	147	127	20	71	52	19	32	20	12	10	7	3	1	0	1	0	0	0	0	0	0	0	0	0	0	0	0
G48	206	198	8	158	149	9	115	108	7	73	79	-6	45	44	1	10	16	-6	3	1	2	0	0	0	0	0	0
G49	163	136	27	62	61	1	17	16	1	2	3	-1	0	0	0	0	0	0	0	0	0	0	0	0	0	0	0
G50	202	191	11	160	133	27	118	82	36	81	35	46	45	5	40	15	1	14	4	0	4	0	0	0	0	0	0
G51	184	173	11	112	100	12	49	55	-6	17	30	-13	3	9	-6	0	1	-1	0	0	0	0	0	0	0	0	0
G52	174	144	30	106	74	32	45	28	17	6	4	2	0	0	0	0	0	0	0	0	0	0	0	0	0	0	0
G53	117	141	-24	39	56	-17	5	13	-8	0	1	-1	0	0	0	0	0	0	0	0	0	0	0	0	0	0	0
G54	132	159	-27	60	90	-30	30	38	-8	13	16	-3	3	4	-1	0	0	0	0	0	0	0	0	0	0	0	0
G55	129	138	-9	63	70	-7	30	34	-4	19	13	6	6	6	0	1	2	-1	1	1	0	0	0	0	0	0	0
G56	147	126	21	52	61	-9	25	41	-16	17	28	-11	13	23	-10	7	16	-9	0	4	-4	0	0	0	0	0	0
G57	139	172	-33	60	81	-21	26	33	-7	6	14	-8	0	7	-7	0	0	0	0	0	0	0	0	0	0	0	0
G58	203	208	-5	165	179	-14	130	140	-10	98	98	0	58	46	12	28	16	12	8	3	5	0	0	0	0	0	0
G59	120	149	-29	53	80	-27	28	35	-7	17	28	-11	9	21	-12	2	9	-7	0	3	-3	0	0	0	0	0	0
G60	196	191	5	145	143	2	98	99	-1	55	57	-2	28	18	10	4	0	4	0	0	0	0	0	0	0	0	0
G61	167	203	-36	87	166	-79	34	113	-79	15	67	-52	1	21	-20	0	4	-4	0	0	0	0	0	0	0	0	0
G62	118	139	-21	49	67	-18	9	14	-5	2	7	-5	0	2	-2	0	0	0	0	0	0	0	0	0	0	0	0
G63	134	178	-44	43	121	-78	7	55	-48	0	14	-14	0	1	-1	0	0	0	0	0	0	0	0	0	0	0	0
G64	137	145	-8	73	83	-10	37	41	-4	21	24	-3	9	14	-5	4	5	-1	1	2	-1	0	0	0	0	0	0
G65	176	188	-12	109	136	-27	50	75	-25	20	25	-5	2	7	-5	0	2	-2	0	0	0	0	0	0	0	0	0
G66	212	188	24	152	134	18	94	79	15	40	30	10	13	13	0	4	2	2	0	0	0	0	0	0	0	0	0
G67	165	106	59	113	34	79	52	6	46	14	1	13	0	0	0	0	0	0	0	0	0	0	0	0	0	0	0
G68	94	159	-65	37	98	-61	14	49	-35	7	15	-8	5	6	-1	2	2	0	1	2	-1	1	1	0	0	0	0
G69	90	122	-32	21	44	-23	6	4	2	0	0	0	0	0	0	0	0	0	0	0	0	0	0	0	0	0	0
G70	192	200	-8	150	167	-17	105	116	-11	57	63	-6	22	29	-7	4	5	-1	0	0	0	0	0	0	0	0	0
G71	211	203	8	163	166	-3	124	135	-11	80	101	-21	31	66	-35	11	22	-11	2	5	-3	0	1	-1	0	0	0
G72	205	178	27	151	82	69	87	21	66	29	2	27	3	0	3	0	0	0	0	0	0	0	0	0	0	0	0
G73	194	168	26	132	93	39	83	28	55	27	5	22	4	0	4	0	0	0	0	0	0	0	0	0	0	0	0
G74	193	192	1	117	150	-33	57	92	-35	14	55	-41	3	14	-11	0	3	-3	0	0	0	0	0	0	0	0	0
G75	192	194	-2	148	143	5	108	106	2	61	76	-15	24	35	-11	3	4	-1	0	0	0	0	0	0	0	0	0
G76	90	108	-18	17	25	-8	0	6	-6	0	2	-2	0	0	0	0	0	0	0	0	0	0	0	0	0	0	0
G77	166	156	10	91	82	9	38	45	-7	15	22	-7	5	4	1	3	2	1	0	0	0	0	0	0	0	0	0
G78	209	184	25	157	145	12	120	99	21	80	56	24	47	22	25	15	0	15	0	0	0	0	0	0	0	0	0
G79	128	106	22	43	41	2	15	15	0	9	2	7	6	0	6	2	0	2	0	0	0	0	0	0	0	0	0
G80	193	205	-12	163	171	-8	123	135	-12	72	103	-31	23	57	-34	3	19	-16	0	1	-1	0	0	0	0	0	0
G81	196	190	6	161	144	17	124	111	13	91	80	11	53	49	4	27	13	14	7	0	7	0	0	0	0	0	0
G82	189	183	6	149	135	14	118	87	31	76	48	28	32	17	15	10	1	9	0	0	0	0	0	0	0	0	0
G83	189	190	-1	146	148	-2	107	106	1	65	63	2	25	21	4	0	3	-3	0	0	0	0	0	0	0	0	0
G84	147	93	54	55	26	29	11	1	10	1	0	1	0	0	0	0	0	0	0	0	0	0	0	0	0	0	0
G85	171	178	-7	103	87	16	49	50	-1	25	33	-8	17	25	-8	13	18	-5	8	11	-3	2	9	-7	1	2	-1
G86	162	171	-9	83	99	-16	33	39	-6	11	5	6	1	0	1	0	0	0	0	0	0	0	0	0	0	0	0
G87	178	158	20	101	77	24	40	23	17	12	2	10	2	0	2	0	0	0	0	0	0	0	0	0	0	0	0
G88	160	142	18	87	54	33	31	14	17	4	5	-1	0	0	0	0	0	0	0	0	0	0	0	0	0	0	0
G89	161	196	-35	80	138	-58	27	78	-51	4	23	-19	0	3	-3	0	0	0	0	0	0	0	0	0	0	0	0
G90	156	192	-36	76	149	-73	35	106	-71	11	68	-57	3	38	-35	0	14	-14	0	1	-1	0	0	0	0	0	0
G91	190	204	-14	146	157	-11	91	103	-12	42	50	-8	13	12	1	1	0	1	0	0	0	0	0	0	0	0	0
G92	202	187	15	167	144	23	126	104	22	89	73	16	55	30	25	15	5	10	2	0	2	0	0	0	0	0	0
G93	190	197	-7	122	134	-12	59	85	-26	20	30	-10	0	2	-2	0	0	0	0	0	0	0	0	0	0	0	0
G94	108	211	-103	37	165	-128	11	110	-99	3	45	-42	0	14	-14	0	4	-4	0	1	-1	0	0	0	0	0	0
G95	127	122	5	48	60	-12	30	35	-5	22	30	-8	14	24	-10	4	19	-15	3	9	-6	0	5	-5	0	0	0
G96	151	169	-18	71	79	-8	41	46	-5	26	32	-6	20	25	-5	13	18	-5	7	11	-4	2	9	-7	2	3	-1
G97	151	206	-55	87	140	-53	52	77	-25	33	40	-7	16	20	-4	6	12	-6	0	6	-6	0	1	-1	0	0	0
G98	137	172	-35	75	95	-20	44	51	-7	18	34	-16	7	20	-13	3	11	-8	0	6	-6	0	2	-2	0	0	0
G99	143	149	-6	64	73	-9	29	40	-11	16	30	-14	2	21	-19	0	15	-15	0	4	-4	0	0	0	0	0	0
G100	179	177	2	115	122	-7	64	79	-15	27	37	-10	6	6	0	0	1	-1	0	0	0	0	0	0	0	0	0
G101	195	215	-20	144	184	-40	91	144	-53	40	94	-54	6	42	-36	0	10	-10	0	2	-2	0	0	0	0	0	0
G102	139	157	-18	68	71	-3	25	26	-1	6	12	-6	0	3	-3	0	0	0	0	0	0	0	0	0	0	0	0
G103	195	189	6	146	137	9	102	98	4	57	63	-6	19	28	-9	4	5	-1	0	0	0	0	0	0	0	0	0
G104	196	186	10	156	119	37	86	70	16	35	33	2	9	11	-2	0	2	-2	0	0	0	0	0	0	0	0	0
G105	205	191	14	166	138	28	129	99	30	83	70	13	58	43	15	28	13	15	8	1	7	0	0	0	0	0	0
G106	136	136	0	66	70	-4	38	37	1	15	19	-4	5	8	-3	2	1	1	0	0	0	0	0	0	0	0	0
G107	80	101	-21	22	26	-4	10	5	5	6	0	6	2	0	2	0	0	0	0	0	0	0	0	0	0	0	0
G108	177	139	38	105	63	42	52	29	23	20	20	0	3	10	-7	0	2	-2	0	0	0	0	0	0	0	0	0
G109	181	187	-6	125	124	1	64	59	5	28	10	18	9	2	7	0	0	0	0	0	0	0	0	0	0	0	0
G110	201	187	14	152	145	7	104	96	8	39	46	-7	10	15	-5	1	3	-2	0	0	0	0	0	0	0	0	0
G111	187	183	4	106	103	3	42	38	4	11	15	-4	1	4	-3	0	0	0	0	0	0	0	0	0	0	0	0
G112	191	182	9	137	115	22	62	68	-6	14	25	-11	1	5	-4	0	0	0	0	0	0	0	0	0	0	0	0
G113	181	194	-13	131	143	-12	94	100	-6	60	64	-4	21	29	-8	3	7	-4	0	1	-1	0	0	0	0	0	0
G114	207	194	13	170	153	17	131	118	13	101	73	28	60	33	27	25	6	19	9	0	9	1	0	1	0	0	0
G115	155	153	2	76	83	-7	38	41	-3	18	18	0	3	6	-3	1	1	0	0	0	0	0	0	0	0	0	0
G116	170	187	-17	126	133	-7	86	87	-1	45	54	-9	14	26	-12	2	4	-2	0	0	0	0	0	0	0	0	0
G117	103	182	-79	36	92	-56	21	36	-15	13	8	5	8	5	3	5	0	5	4	0	4	0	0	0	0	0	0
G118	191	199	-8	156	145	11	111	77	34	67	26	41	29	4	25	11	0	11	1	0	1	0	0	0	0	0	0
G119	163	165	-2	90	91	-1	43	19	24	9	3	6	1	0	1	0	0	0	0	0	0	0	0	0	0	0	0
G120	191	161	30	133	82	51	79	40	39	33	26	7	8	22	-14	3	13	-10	1	0	1	0	0	0	0	0	0
G121	196	198	-2	137	160	-23	98	127	-29	59	93	-34	28	57	-29	6	24	-18	0	4	-4	0	1	-1	0	0	0
G122	150	186	-36	67	136	-69	19	89	-70	1	38	-37	0	2	-2	0	0	0	0	0	0	0	0	0	0	0	0
G123	183	160	23	127	96	31	64	44	20	19	11	8	0	2	-2	0	0	0	0	0	0	0	0	0	0	0	0
G124	190	190	0	145	137	8	103	87	16	43	40	3	5	10	-5	0	0	0	0	0	0	0	0	0	0	0	0
G125	194	137	57	123	56	67	43	21	22	5	3	2	0	2	-2	0	0	0	0	0	0	0	0	0	0	0	0
G126	191	199	-8	147	158	-11	93	124	-31	31	89	-58	2	49	-47	0	21	-21	0	1	-1	0	0	0	0	0	0
G127	184	177	7	126	116	10	79	68	11	34	37	-3	7	11	-4	2	3	-1	0	0	0	0	0	0	0	0	0
G128	179	189	-10	128	155	-27	91	108	-17	32	56	-24	4	24	-20	0	4	-4	0	0	0	0	0	0	0	0	0
G129	201	178	23	156	129	27	102	63	39	62	28	34	22	2	20	1	0	1	0	0	0	0	0	0	0	0	0
G130	104	155	-51	25	55	-30	5	13	-8	1	1	0	0	0	0	0	0	0	0	0	0	0	0	0	0	0	0
G131	189	181	8	140	130	10	89	96	-7	39	62	-23	12	30	-18	0	5	-5	0	0	0	0	0	0	0	0	0
G132	74	104	-30	11	21	-10	1	3	-2	1	0	1	0	0	0	0	0	0	0	0	0	0	0	0	0	0	0
G133	178	191	-13	130	97	33	90	33	57	44	2	42	10	0	10	0	0	0	0	0	0	0	0	0	0	0	0
G134	198	206	-8	160	166	-6	121	139	-18	69	98	-29	21	49	-28	3	16	-13	0	1	-1	0	0	0	0	0	0
G135	153	176	-23	73	104	-31	15	32	-17	1	11	-10	0	0	0	0	0	0	0	0	0	0	0	0	0	0	0
G136	193	148	45	129	70	59	77	24	53	42	3	39	8	0	8	0	0	0	0	0	0	0	0	0	0	0	0
G137	183	203	-20	131	160	-29	74	109	-35	27	57	-30	0	7	-7	0	0	0	0	0	0	0	0	0	0	0	0
G138	198	197	1	157	127	30	122	89	33	71	64	7	33	25	8	10	5	5	0	0	0	0	0	0	0	0	0
G139	149	187	-38	99	133	-34	51	58	-7	9	20	-11	2	0	2	0	0	0	0	0	0	0	0	0	0	0	0
G140	196	194	2	153	136	17	94	74	20	40	22	18	3	6	-3	1	0	1	0	0	0	0	0	0	0	0	0
G141	168	194	-26	116	145	-29	65	102	-37	26	69	-43	4	34	-30	0	11	-11	0	1	-1	0	0	0	0	0	0
G142	143	160	-17	71	85	-14	33	43	-10	14	21	-7	6	13	-7	3	4	-1	0	1	-1	0	0	0	0	0	0
G143	165	173	-8	84	100	-16	25	45	-20	2	6	-4	0	1	-1	0	0	0	0	0	0	0	0	0	0	0	0
G144	208	200	8	177	157	20	135	129	6	98	90	8	48	49	-1	14	5	9	0	1	-1	0	0	0	0	0	0
G145	202	210	-8	135	158	-23	66	106	-40	22	43	-21	2	5	-3	0	0	0	0	0	0	0	0	0	0	0	0
G146	198	204	-6	141	152	-11	76	97	-21	30	52	-22	10	25	-15	2	6	-4	0	0	0	0	0	0	0	0	0
G147	200	200	0	161	167	-6	117	125	-8	69	75	-6	21	42	-21	1	16	-15	0	0	0	0	0	0	0	0	0
G148	197	196	1	154	156	-2	112	118	-6	70	74	-4	29	32	-3	9	2	7	1	0	1	0	0	0	0	0	0
G149	166	205	-39	88	161	-73	31	110	-79	4	56	-52	0	20	-20	0	5	-5	0	1	-1	0	0	0	0	0	0
G150	190	212	-22	142	171	-29	96	135	-39	47	92	-45	14	51	-37	2	19	-17	0	3	-3	0	0	0	0	0	0
G151	197	186	11	154	130	24	108	88	20	42	40	2	9	14	-5	2	2	0	0	0	0	0	0	0	0	0	0
G152	171	169	2	93	77	16	31	35	-4	2	9	-7	0	0	0	0	0	0	0	0	0	0	0	0	0	0	0
G153	189	181	8	137	114	23	101	69	32	53	33	20	16	2	14	1	0	1	0	0	0	0	0	0	0	0	0
G154	206	197	9	159	149	10	125	90	35	94	48	46	54	15	39	19	0	19	5	0	5	0	0	0	0	0	0
G155	159	148	11	85	72	13	44	36	8	21	30	-9	17	23	-6	10	14	-4	4	9	-5	0	6	-6	0	0	0
G156	195	205	-10	151	163	-12	95	133	-38	52	96	-44	15	59	-44	4	26	-22	0	7	-7	0	1	-1	0	0	0
G157	212	203	9	173	164	9	142	130	12	110	104	6	77	55	22	47	21	26	17	3	14	2	0	2	0	0	0
G158	128	169	-41	45	115	-70	11	74	-63	0	27	-27	0	3	-3	0	1	-1	0	0	0	0	0	0	0	0	0
G159	186	190	-4	122	125	-3	61	62	-1	21	26	-5	6	8	-2	4	2	2	1	1	0	0	0	0	0	0	0
G160	177	147	30	98	76	22	41	33	8	21	7	14	4	2	2	0	0	0	0	0	0	0	0	0	0	0	0
G161	199	179	20	157	120	37	102	74	28	62	33	29	19	5	14	3	0	3	0	0	0	0	0	0	0	0	0
G162	182	178	4	115	118	-3	56	63	-7	16	19	-3	6	4	2	2	0	2	0	0	0	0	0	0	0	0	0
G163	206	205	1	165	160	5	135	135	0	103	102	1	68	67	1	25	32	-7	8	5	3	0	0	0	0	0	0
G164	187	153	34	131	69	62	74	32	42	29	11	18	12	7	5	3	2	1	0	1	-1	0	0	0	0	0	0
G165	208	186	22	144	136	8	63	102	-39	11	71	-60	0	37	-37	0	5	-5	0	1	-1	0	0	0	0	0	0
G166	171	191	-20	100	139	-39	47	91	-44	14	47	-33	2	13	-11	0	5	-5	0	1	-1	0	0	0	0	0	0
G167	101	131	-30	27	46	-19	8	15	-7	4	5	-1	3	3	0	0	0	0	0	0	0	0	0	0	0	0	0
G168	171	160	11	110	74	36	59	49	10	27	35	-8	16	24	-8	11	20	-9	5	11	-6	0	5	-5	0	0	0
G169	181	163	18	115	88	27	63	51	12	28	36	-8	17	26	-9	9	19	-10	3	9	-6	0	4	-4	0	0	0
G170	195	161	34	149	104	45	108	59	49	60	25	35	26	4	22	10	0	10	3	0	3	0	0	0	0	0	0
G171	197	199	-2	147	145	2	106	103	3	66	70	-4	26	28	-2	3	4	-1	0	1	-1	0	0	0	0	0	0
G172	188	196	-8	145	163	-18	101	126	-25	65	91	-26	31	59	-28	4	28	-24	0	5	-5	0	1	-1	0	0	0
G173	195	201	-6	149	148	1	98	89	9	44	39	5	8	8	0	1	0	1	0	0	0	0	0	0	0	0	0
G174	177	189	-12	113	129	-16	43	63	-20	10	26	-16	2	2	0	0	0	0	0	0	0	0	0	0	0	0	0
G175	194	201	-7	153	168	-15	122	137	-15	96	106	-10	51	69	-18	17	31	-14	3	5	-2	0	0	0	0	0	0
G176	198	180	18	157	119	38	111	86	25	62	39	23	24	9	15	7	1	6	0	0	0	0	0	0	0	0	0
G177	201	192	9	148	155	-7	86	101	-15	36	48	-12	6	17	-11	0	1	-1	0	0	0	0	0	0	0	0	0
G178	183	174	9	108	109	-1	59	40	19	19	16	3	6	3	3	4	1	3	0	0	0	0	0	0	0	0	0
G179	178	186	-8	119	126	-7	58	69	-11	22	30	-8	0	10	-10	0	0	0	0	0	0	0	0	0	0	0	0
G180	115	187	-72	58	116	-58	24	63	-39	19	31	-12	11	19	-8	4	8	-4	0	3	-3	0	0	0	0	0	0
G181	198	199	-1	149	148	1	105	103	2	64	60	4	32	22	10	6	3	3	0	0	0	0	0	0	0	0	0
G182	151	116	35	74	38	36	22	11	11	8	3	5	4	1	3	1	0	1	0	0	0	0	0	0	0	0	0
G183	176	152	24	96	77	19	47	35	12	14	12	2	3	4	-1	0	0	0	0	0	0	0	0	0	0	0	0
G184	152	188	-36	96	148	-52	49	109	-60	19	57	-38	5	19	-14	1	6	-5	0	0	0	0	0	0	0	0	0
G185	156	211	-55	74	166	-92	34	105	-71	9	55	-46	0	23	-23	0	5	-5	0	2	-2	0	0	0	0	0	0
G186	150	198	-48	60	129	-69	20	54	-34	2	5	-3	0	0	0	0	0	0	0	0	0	0	0	0	0	0	0
G187	167	138	29	87	68	19	40	37	3	11	9	2	1	0	1	0	0	0	0	0	0	0	0	0	0	0	0
G188	206	210	-4	165	170	-5	131	130	1	82	97	-15	42	46	-4	14	12	2	0	1	-1	0	0	0	0	0	0
G189	172	199	-27	102	143	-41	50	85	-35	18	38	-20	7	10	-3	0	3	-3	0	0	0	0	0	0	0	0	0
G190	162	178	-16	91	127	-36	38	68	-30	6	31	-25	0	11	-11	0	3	-3	0	0	0	0	0	0	0	0	0
G191	143	191	-48	69	122	-53	19	73	-54	4	22	-18	2	3	-1	0	1	-1	0	0	0	0	0	0	0	0	0
G192	188	152	36	127	80	47	81	42	39	36	14	22	4	2	2	1	0	1	0	0	0	0	0	0	0	0	0
G193	204	212	-8	153	171	-18	74	122	-48	35	74	-39	9	32	-23	2	5	-3	1	1	0	0	0	0	0	0	0
G194	156	187	-31	87	123	-36	46	72	-26	27	35	-8	11	14	-3	4	7	-3	0	1	-1	0	0	0	0	0	0
G195	198	197	1	160	151	9	110	97	13	61	58	3	25	16	9	4	4	0	0	0	0	0	0	0	0	0	0
G196	177	171	6	112	93	19	59	41	18	27	12	15	3	1	2	1	0	1	0	0	0	0	0	0	0	0	0
G197	185	186	-1	146	125	21	105	84	21	49	56	-7	17	20	-3	1	3	-2	0	0	0	0	0	0	0	0	0
G198	95	152	-57	28	53	-25	6	9	-3	0	0	0	0	0	0	0	0	0	0	0	0	0	0	0	0	0	0
G199	190	218	-28	119	159	-40	47	93	-46	12	39	-27	0	9	-9	0	1	-1	0	0	0	0	0	0	0	0	0
G200	192	194	-2	150	141	9	113	107	6	70	75	-5	40	40	0	7	14	-7	0	0	0	0	0	0	0	0	0
G201	202	173	29	154	123	31	115	89	26	76	55	21	45	20	25	19	2	17	1	0	1	0	0	0	0	0	0
G202	211	186	25	164	125	39	108	68	40	72	29	43	41	11	30	13	3	10	1	1	0	0	0	0	0	0	0
G203	149	163	-14	78	80	-2	38	42	-4	23	33	-10	19	25	-6	13	19	-6	8	13	-5	2	7	-5	1	2	-1
G204	194	180	14	134	92	42	80	39	41	26	8	18	7	2	5	2	0	2	0	0	0	0	0	0	0	0	0
G205	170	124	46	100	59	41	53	36	17	22	28	-6	12	21	-9	2	14	-12	0	4	-4	0	0	0	0	0	0
G206	160	157	3	80	94	-14	36	47	-11	10	17	-7	1	7	-6	1	0	1	0	0	0	0	0	0	0	0	0
G207	207	216	-9	167	177	-10	141	150	-9	107	116	-9	70	75	-5	38	35	3	10	9	1	0	0	0	0	0	0
G208	157	188	-31	90	134	-44	39	86	-47	9	49	-40	1	21	-20	0	4	-4	0	0	0	0	0	0	0	0	0
G209	196	178	18	149	137	12	111	89	22	62	51	11	19	11	8	1	2	-1	0	0	0	0	0	0	0	0	0
G210	138	138	0	68	58	10	35	38	-3	25	32	-7	14	23	-9	9	16	-7	3	5	-2	1	1	0	0	0	0
G211	127	143	-16	49	72	-23	18	23	-5	12	2	10	6	2	4	3	1	2	3	0	3	0	0	0	0	0	0
G212	117	154	-37	46	87	-41	23	45	-22	5	26	-21	4	12	-8	1	1	0	0	1	-1	0	0	0	0	0	0
G213	205	203	2	170	159	11	132	112	20	75	78	-3	38	32	6	10	5	5	0	0	0	0	0	0	0	0	0
G214	106	121	-15	39	57	-18	24	38	-14	13	28	-15	8	19	-11	1	12	-11	0	7	-7	0	1	-1	0	0	0
G215	194	193	1	144	162	-18	101	125	-24	67	87	-20	26	40	-14	3	6	-3	0	0	0	0	0	0	0	0	0
G216	195	186	9	156	133	23	122	91	31	89	51	38	43	15	28	7	1	6	1	0	1	0	0	0	0	0	0
G217	105	164	-59	28	80	-52	8	30	-22	1	4	-3	0	0	0	0	0	0	0	0	0	0	0	0	0	0	0
G218	87	150	-63	16	57	-41	2	21	-19	0	4	-4	0	0	0	0	0	0	0	0	0	0	0	0	0	0	0
G219	147	137	10	59	47	12	17	5	12	1	1	0	1	0	1	0	0	0	0	0	0	0	0	0	0	0	0
G220	192	168	24	145	104	41	100	51	49	44	22	22	13	5	8	3	1	2	0	0	0	0	0	0	0	0	0
G221	158	130	28	90	66	24	41	38	3	20	29	-9	10	22	-12	2	15	-13	0	5	-5	0	0	0	0	0	0
G222	106	145	-39	32	79	-47	8	25	-17	5	9	-4	5	4	1	2	3	-1	1	1	0	1	1	0	0	0	0
G223	120	141	-21	38	71	-33	16	39	-23	3	15	-12	0	6	-6	0	2	-2	0	0	0	0	0	0	0	0	0
G224	138	139	-1	54	58	-4	10	16	-6	1	2	-1	0	0	0	0	0	0	0	0	0	0	0	0	0	0	0
G225	176	204	-28	107	158	-51	50	98	-48	22	47	-25	6	21	-15	3	4	-1	1	2	-1	0	0	0	0	0	0
G226	199	201	-2	172	165	7	128	135	-7	94	94	0	49	56	-7	13	22	-9	3	1	2	0	0	0	0	0	0
G227	208	214	-6	137	170	-33	68	105	-37	28	40	-12	10	13	-3	2	2	0	1	0	1	0	0	0	0	0	0
G228	122	108	14	44	41	3	7	13	-6	0	4	-4	0	0	0	0	0	0	0	0	0	0	0	0	0	0	0
G229	135	147	-12	59	94	-35	22	53	-31	7	29	-22	1	9	-8	0	0	0	0	0	0	0	0	0	0	0	0
G230	210	194	16	156	143	13	112	97	15	63	59	4	15	20	-5	2	4	-2	1	0	1	0	0	0	0	0	0
G231	204	190	14	162	136	26	111	92	19	70	53	17	27	16	11	6	6	0	1	0	1	0	0	0	0	0	0
G232	159	142	17	90	68	22	34	25	9	17	9	8	6	2	4	1	0	1	0	0	0	0	0	0	0	0	0
G233	202	193	9	151	144	7	124	96	28	83	68	15	53	36	17	26	14	12	6	2	4	0	0	0	0	0	0
G234	168	102	66	94	25	69	32	10	22	9	4	5	0	2	-2	0	1	-1	0	0	0	0	0	0	0	0	0
G235	184	210	-26	130	168	-38	76	122	-46	35	78	-43	10	39	-29	1	19	-18	0	4	-4	0	0	0	0	0	0
G236	169	191	-22	95	146	-51	50	98	-48	10	48	-38	1	21	-20	0	4	-4	0	0	0	0	0	0	0	0	0
G237	178	200	-22	126	152	-26	91	108	-17	37	63	-26	9	26	-17	0	5	-5	0	0	0	0	0	0	0	0	0
G238	200	135	65	133	63	70	74	37	37	35	25	10	8	18	-10	1	6	-5	0	0	0	0	0	0	0	0	0
G239	191	199	-8	148	152	-4	96	107	-11	55	54	1	20	18	2	1	1	0	0	0	0	0	0	0	0	0	0
G240	189	181	8	119	118	1	81	71	10	35	22	13	7	0	7	0	0	0	0	0	0	0	0	0	0	0	0
G241	154	168	-14	69	80	-11	14	34	-20	1	11	-10	0	1	-1	0	0	0	0	0	0	0	0	0	0	0	0
G242	194	193	1	126	131	-5	65	74	-9	22	25	-3	5	12	-7	0	3	-3	0	0	0	0	0	0	0	0	0
G243	180	165	15	90	76	14	26	32	-6	8	13	-5	3	7	-4	0	0	0	0	0	0	0	0	0	0	0	0
G244	97	128	-31	10	58	-48	2	15	-13	0	1	-1	0	0	0	0	0	0	0	0	0	0	0	0	0	0	0

## Sheet: Degree difference
	0.1E-C	0.1ABS	0.2E-C	0.2ABS	0.3E-C	0.3ABS	0.4E-C	0.4ABS	0.5E-C	0.5ABS	0.6E-C	0.6ABS	0.7E-C	0.7ABS	0.8E-C	0.8ABS	0.9E-C	0.9ABS
G1	10	10	11	11	-1	1	-12	12	11	11	14	14	4	4	1	1	0	0
G2	20	20	15	15	-1	1	1	1	0	0	0	0	0	0	0	0	0	0
G3	18	18	24	24	12	12	6	6	0	0	0	0	0	0	0	0	0	0
G4	15	15	10	10	17	17	7	7	-4	4	4	4	3	3	1	1	0	0
G5	-11	11	-7	7	-5	5	4	4	10	10	-2	2	0	0	0	0	0	0
G6	5	5	5	5	4	4	4	4	1	1	0	0	0	0	0	0	0	0
G7	1	1	-5	5	-4	4	-9	9	-8	8	-16	16	0	0	0	0	0	0
G8	7	7	5	5	18	18	16	16	7	7	1	1	0	0	0	0	0	0
G9	-51	51	-45	45	-28	28	-4	4	-3	3	0	0	0	0	0	0	0	0
G10	-21	21	-43	43	-60	60	-49	49	-36	36	-8	8	0	0	0	0	0	0
G11	-8	8	-6	6	-23	23	-32	32	-23	23	-5	5	0	0	0	0	0	0
G12	-18	18	-10	10	-3	3	-1	1	0	0	0	0	0	0	0	0	0	0
G13	-5	5	-7	7	-7	7	-15	15	-18	18	-6	6	-1	1	0	0	0	0
G14	-18	18	-32	32	-27	27	-15	15	-5	5	0	0	0	0	0	0	0	0
G15	2	2	-1	1	-4	4	-8	8	-8	8	-6	6	-4	4	0	0	0	0
G16	54	54	52	52	27	27	5	5	2	2	1	1	0	0	0	0	0	0
G17	22	22	30	30	10	10	6	6	5	5	1	1	1	1	0	0	0	0
G18	-3	3	10	10	18	18	-2	2	2	2	9	9	0	0	0	0	0	0
G19	16	16	13	13	7	7	13	13	-8	8	-3	3	0	0	0	0	0	0
G20	9	9	28	28	58	58	50	50	34	34	7	7	0	0	0	0	0	0
G21	1	1	7	7	3	3	-9	9	-1	1	-4	4	1	1	0	0	0	0
G22	-7	7	-13	13	-23	23	-21	21	-1	1	0	0	-1	1	0	0	0	0
G23	-10	10	-8	8	0	0	13	13	13	13	7	7	1	1	0	0	0	0
G24	-25	25	-47	47	-79	79	-62	62	-43	43	-10	10	-1	1	0	0	0	0
G25	-20	20	-30	30	-22	22	-3	3	-1	1	0	0	0	0	0	0	0	0
G26	1	1	-6	6	-22	22	-31	31	-15	15	-2	2	0	0	0	0	0	0
G27	-12	12	0	0	-17	17	-17	17	-9	9	-4	4	1	1	0	0	0	0
G28	23	23	40	40	32	32	30	30	20	20	4	4	0	0	0	0	0	0
G29	-16	16	-17	17	-28	28	-40	40	-33	33	-15	15	-1	1	0	0	0	0
G30	-3	3	-9	9	3	3	-4	4	-5	5	1	1	0	0	0	0	0	0
G31	-40	40	-30	30	-7	7	2	2	2	2	0	0	0	0	0	0	0	0
G32	1	1	5	5	0	0	8	8	6	6	3	3	2	2	0	0	0	0
G33	3	3	8	8	8	8	10	10	4	4	2	2	2	2	0	0	0	0
G34	35	35	29	29	15	15	8	8	4	4	1	1	0	0	0	0	0	0
G35	17	17	24	24	8	8	-10	10	-17	17	-9	9	0	0	0	0	0	0
G36	-2	2	0	0	5	5	-5	5	12	12	6	6	4	4	1	1	0	0
G37	-24	24	-19	19	-6	6	-12	12	-3	3	0	0	0	0	0	0	0	0
G38	10	10	0	0	-13	13	-13	13	-10	10	-6	6	-10	10	-6	6	-1	1
G39	19	19	28	28	17	17	5	5	5	5	2	2	0	0	0	0	0	0
G40	9	9	22	22	14	14	8	8	10	10	0	0	0	0	0	0	0	0
G41	16	16	32	32	12	12	2	2	-4	4	-1	1	-1	1	0	0	0	0
G42	-18	18	-38	38	-51	51	-58	58	-25	25	-4	4	0	0	0	0	0	0
G43	-9	9	-30	30	-44	44	-54	54	-36	36	-4	4	0	0	0	0	0	0
G44	-12	12	-12	12	-40	40	-25	25	-6	6	-1	1	0	0	0	0	0	0
G45	-36	36	-44	44	-28	28	-14	14	-7	7	-1	1	0	0	0	0	0	0
G46	10	10	-4	4	-1	1	-6	6	-5	5	-8	8	-8	8	-1	1	0	0
G47	20	20	19	19	12	12	3	3	1	1	0	0	0	0	0	0	0	0
G48	8	8	9	9	7	7	-6	6	1	1	-6	6	2	2	0	0	0	0
G49	27	27	1	1	1	1	-1	1	0	0	0	0	0	0	0	0	0	0
G50	11	11	27	27	36	36	46	46	40	40	14	14	4	4	0	0	0	0
G51	11	11	12	12	-6	6	-13	13	-6	6	-1	1	0	0	0	0	0	0
G52	30	30	32	32	17	17	2	2	0	0	0	0	0	0	0	0	0	0
G53	-24	24	-17	17	-8	8	-1	1	0	0	0	0	0	0	0	0	0	0
G54	-27	27	-30	30	-8	8	-3	3	-1	1	0	0	0	0	0	0	0	0
G55	-9	9	-7	7	-4	4	6	6	0	0	-1	1	0	0	0	0	0	0
G56	21	21	-9	9	-16	16	-11	11	-10	10	-9	9	-4	4	0	0	0	0
G57	-33	33	-21	21	-7	7	-8	8	-7	7	0	0	0	0	0	0	0	0
G58	-5	5	-14	14	-10	10	0	0	12	12	12	12	5	5	0	0	0	0
G59	-29	29	-27	27	-7	7	-11	11	-12	12	-7	7	-3	3	0	0	0	0
G60	5	5	2	2	-1	1	-2	2	10	10	4	4	0	0	0	0	0	0
G61	-36	36	-79	79	-79	79	-52	52	-20	20	-4	4	0	0	0	0	0	0
G62	-21	21	-18	18	-5	5	-5	5	-2	2	0	0	0	0	0	0	0	0
G63	-44	44	-78	78	-48	48	-14	14	-1	1	0	0	0	0	0	0	0	0
G64	-8	8	-10	10	-4	4	-3	3	-5	5	-1	1	-1	1	0	0	0	0
G65	-12	12	-27	27	-25	25	-5	5	-5	5	-2	2	0	0	0	0	0	0
G66	24	24	18	18	15	15	10	10	0	0	2	2	0	0	0	0	0	0
G67	59	59	79	79	46	46	13	13	0	0	0	0	0	0	0	0	0	0
G68	-65	65	-61	61	-35	35	-8	8	-1	1	0	0	-1	1	0	0	0	0
G69	-32	32	-23	23	2	2	0	0	0	0	0	0	0	0	0	0	0	0
G70	-8	8	-17	17	-11	11	-6	6	-7	7	-1	1	0	0	0	0	0	0
G71	8	8	-3	3	-11	11	-21	21	-35	35	-11	11	-3	3	-1	1	0	0
G72	27	27	69	69	66	66	27	27	3	3	0	0	0	0	0	0	0	0
G73	26	26	39	39	55	55	22	22	4	4	0	0	0	0	0	0	0	0
G74	1	1	-33	33	-35	35	-41	41	-11	11	-3	3	0	0	0	0	0	0
G75	-2	2	5	5	2	2	-15	15	-11	11	-1	1	0	0	0	0	0	0
G76	-18	18	-8	8	-6	6	-2	2	0	0	0	0	0	0	0	0	0	0
G77	10	10	9	9	-7	7	-7	7	1	1	1	1	0	0	0	0	0	0
G78	25	25	12	12	21	21	24	24	25	25	15	15	0	0	0	0	0	0
G79	22	22	2	2	0	0	7	7	6	6	2	2	0	0	0	0	0	0
G80	-12	12	-8	8	-12	12	-31	31	-34	34	-16	16	-1	1	0	0	0	0
G81	6	6	17	17	13	13	11	11	4	4	14	14	7	7	0	0	0	0
G82	6	6	14	14	31	31	28	28	15	15	9	9	0	0	0	0	0	0
G83	-1	1	-2	2	1	1	2	2	4	4	-3	3	0	0	0	0	0	0
G84	54	54	29	29	10	10	1	1	0	0	0	0	0	0	0	0	0	0
G85	-7	7	16	16	-1	1	-8	8	-8	8	-5	5	-3	3	-7	7	-1	1
G86	-9	9	-16	16	-6	6	6	6	1	1	0	0	0	0	0	0	0	0
G87	20	20	24	24	17	17	10	10	2	2	0	0	0	0	0	0	0	0
G88	18	18	33	33	17	17	-1	1	0	0	0	0	0	0	0	0	0	0
G89	-35	35	-58	58	-51	51	-19	19	-3	3	0	0	0	0	0	0	0	0
G90	-36	36	-73	73	-71	71	-57	57	-35	35	-14	14	-1	1	0	0	0	0
G91	-14	14	-11	11	-12	12	-8	8	1	1	1	1	0	0	0	0	0	0
G92	15	15	23	23	22	22	16	16	25	25	10	10	2	2	0	0	0	0
G93	-7	7	-12	12	-26	26	-10	10	-2	2	0	0	0	0	0	0	0	0
G94	-103	103	-128	128	-99	99	-42	42	-14	14	-4	4	-1	1	0	0	0	0
G95	5	5	-12	12	-5	5	-8	8	-10	10	-15	15	-6	6	-5	5	0	0
G96	-18	18	-8	8	-5	5	-6	6	-5	5	-5	5	-4	4	-7	7	-1	1
G97	-55	55	-53	53	-25	25	-7	7	-4	4	-6	6	-6	6	-1	1	0	0
G98	-35	35	-20	20	-7	7	-16	16	-13	13	-8	8	-6	6	-2	2	0	0
G99	-6	6	-9	9	-11	11	-14	14	-19	19	-15	15	-4	4	0	0	0	0
G100	2	2	-7	7	-15	15	-10	10	0	0	-1	1	0	0	0	0	0	0
G101	-20	20	-40	40	-53	53	-54	54	-36	36	-10	10	-2	2	0	0	0	0
G102	-18	18	-3	3	-1	1	-6	6	-3	3	0	0	0	0	0	0	0	0
G103	6	6	9	9	4	4	-6	6	-9	9	-1	1	0	0	0	0	0	0
G104	10	10	37	37	16	16	2	2	-2	2	-2	2	0	0	0	0	0	0
G105	14	14	28	28	30	30	13	13	15	15	15	15	7	7	0	0	0	0
G106	0	0	-4	4	1	1	-4	4	-3	3	1	1	0	0	0	0	0	0
G107	-21	21	-4	4	5	5	6	6	2	2	0	0	0	0	0	0	0	0
G108	38	38	42	42	23	23	0	0	-7	7	-2	2	0	0	0	0	0	0
G109	-6	6	1	1	5	5	18	18	7	7	0	0	0	0	0	0	0	0
G110	14	14	7	7	8	8	-7	7	-5	5	-2	2	0	0	0	0	0	0
G111	4	4	3	3	4	4	-4	4	-3	3	0	0	0	0	0	0	0	0
G112	9	9	22	22	-6	6	-11	11	-4	4	0	0	0	0	0	0	0	0
G113	-13	13	-12	12	-6	6	-4	4	-8	8	-4	4	-1	1	0	0	0	0
G114	13	13	17	17	13	13	28	28	27	27	19	19	9	9	1	1	0	0
G115	2	2	-7	7	-3	3	0	0	-3	3	0	0	0	0	0	0	0	0
G116	-17	17	-7	7	-1	1	-9	9	-12	12	-2	2	0	0	0	0	0	0
G117	-79	79	-56	56	-15	15	5	5	3	3	5	5	4	4	0	0	0	0
G118	-8	8	11	11	34	34	41	41	25	25	11	11	1	1	0	0	0	0
G119	-2	2	-1	1	24	24	6	6	1	1	0	0	0	0	0	0	0	0
G120	30	30	51	51	39	39	7	7	-14	14	-10	10	1	1	0	0	0	0
G121	-2	2	-23	23	-29	29	-34	34	-29	29	-18	18	-4	4	-1	1	0	0
G122	-36	36	-69	69	-70	70	-37	37	-2	2	0	0	0	0	0	0	0	0
G123	23	23	31	31	20	20	8	8	-2	2	0	0	0	0	0	0	0	0
G124	0	0	8	8	16	16	3	3	-5	5	0	0	0	0	0	0	0	0
G125	57	57	67	67	22	22	2	2	-2	2	0	0	0	0	0	0	0	0
G126	-8	8	-11	11	-31	31	-58	58	-47	47	-21	21	-1	1	0	0	0	0
G127	7	7	10	10	11	11	-3	3	-4	4	-1	1	0	0	0	0	0	0
G128	-10	10	-27	27	-17	17	-24	24	-20	20	-4	4	0	0	0	0	0	0
G129	23	23	27	27	39	39	34	34	20	20	1	1	0	0	0	0	0	0
G130	-51	51	-30	30	-8	8	0	0	0	0	0	0	0	0	0	0	0	0
G131	8	8	10	10	-7	7	-23	23	-18	18	-5	5	0	0	0	0	0	0
G132	-30	30	-10	10	-2	2	1	1	0	0	0	0	0	0	0	0	0	0
G133	-13	13	33	33	57	57	42	42	10	10	0	0	0	0	0	0	0	0
G134	-8	8	-6	6	-18	18	-29	29	-28	28	-13	13	-1	1	0	0	0	0
G135	-23	23	-31	31	-17	17	-10	10	0	0	0	0	0	0	0	0	0	0
G136	45	45	59	59	53	53	39	39	8	8	0	0	0	0	0	0	0	0
G137	-20	20	-29	29	-35	35	-30	30	-7	7	0	0	0	0	0	0	0	0
G138	1	1	30	30	33	33	7	7	8	8	5	5	0	0	0	0	0	0
G139	-38	38	-34	34	-7	7	-11	11	2	2	0	0	0	0	0	0	0	0
G140	2	2	17	17	20	20	18	18	-3	3	1	1	0	0	0	0	0	0
G141	-26	26	-29	29	-37	37	-43	43	-30	30	-11	11	-1	1	0	0	0	0
G142	-17	17	-14	14	-10	10	-7	7	-7	7	-1	1	-1	1	0	0	0	0
G143	-8	8	-16	16	-20	20	-4	4	-1	1	0	0	0	0	0	0	0	0
G144	8	8	20	20	6	6	8	8	-1	1	9	9	-1	1	0	0	0	0
G145	-8	8	-23	23	-40	40	-21	21	-3	3	0	0	0	0	0	0	0	0
G146	-6	6	-11	11	-21	21	-22	22	-15	15	-4	4	0	0	0	0	0	0
G147	0	0	-6	6	-8	8	-6	6	-21	21	-15	15	0	0	0	0	0	0
G148	1	1	-2	2	-6	6	-4	4	-3	3	7	7	1	1	0	0	0	0
G149	-39	39	-73	73	-79	79	-52	52	-20	20	-5	5	-1	1	0	0	0	0
G150	-22	22	-29	29	-39	39	-45	45	-37	37	-17	17	-3	3	0	0	0	0
G151	11	11	24	24	20	20	2	2	-5	5	0	0	0	0	0	0	0	0
G152	2	2	16	16	-4	4	-7	7	0	0	0	0	0	0	0	0	0	0
G153	8	8	23	23	32	32	20	20	14	14	1	1	0	0	0	0	0	0
G154	9	9	10	10	35	35	46	46	39	39	19	19	5	5	0	0	0	0
G155	11	11	13	13	8	8	-9	9	-6	6	-4	4	-5	5	-6	6	0	0
G156	-10	10	-12	12	-38	38	-44	44	-44	44	-22	22	-7	7	-1	1	0	0
G157	9	9	9	9	12	12	6	6	22	22	26	26	14	14	2	2	0	0
G158	-41	41	-70	70	-63	63	-27	27	-3	3	-1	1	0	0	0	0	0	0
G159	-4	4	-3	3	-1	1	-5	5	-2	2	2	2	0	0	0	0	0	0
G160	30	30	22	22	8	8	14	14	2	2	0	0	0	0	0	0	0	0
G161	20	20	37	37	28	28	29	29	14	14	3	3	0	0	0	0	0	0
G162	4	4	-3	3	-7	7	-3	3	2	2	2	2	0	0	0	0	0	0
G163	1	1	5	5	0	0	1	1	1	1	-7	7	3	3	0	0	0	0
G164	34	34	62	62	42	42	18	18	5	5	1	1	-1	1	0	0	0	0
G165	22	22	8	8	-39	39	-60	60	-37	37	-5	5	-1	1	0	0	0	0
G166	-20	20	-39	39	-44	44	-33	33	-11	11	-5	5	-1	1	0	0	0	0
G167	-30	30	-19	19	-7	7	-1	1	0	0	0	0	0	0	0	0	0	0
G168	11	11	36	36	10	10	-8	8	-8	8	-9	9	-6	6	-5	5	0	0
G169	18	18	27	27	12	12	-8	8	-9	9	-10	10	-6	6	-4	4	0	0
G170	34	34	45	45	49	49	35	35	22	22	10	10	3	3	0	0	0	0
G171	-2	2	2	2	3	3	-4	4	-2	2	-1	1	-1	1	0	0	0	0
G172	-8	8	-18	18	-25	25	-26	26	-28	28	-24	24	-5	5	-1	1	0	0
G173	-6	6	1	1	9	9	5	5	0	0	1	1	0	0	0	0	0	0
G174	-12	12	-16	16	-20	20	-16	16	0	0	0	0	0	0	0	0	0	0
G175	-7	7	-15	15	-15	15	-10	10	-18	18	-14	14	-2	2	0	0	0	0
G176	18	18	38	38	25	25	23	23	15	15	6	6	0	0	0	0	0	0
G177	9	9	-7	7	-15	15	-12	12	-11	11	-1	1	0	0	0	0	0	0
G178	9	9	-1	1	19	19	3	3	3	3	3	3	0	0	0	0	0	0
G179	-8	8	-7	7	-11	11	-8	8	-10	10	0	0	0	0	0	0	0	0
G180	-72	72	-58	58	-39	39	-12	12	-8	8	-4	4	-3	3	0	0	0	0
G181	-1	1	1	1	2	2	4	4	10	10	3	3	0	0	0	0	0	0
G182	35	35	36	36	11	11	5	5	3	3	1	1	0	0	0	0	0	0
G183	24	24	19	19	12	12	2	2	-1	1	0	0	0	0	0	0	0	0
G184	-36	36	-52	52	-60	60	-38	38	-14	14	-5	5	0	0	0	0	0	0
G185	-55	55	-92	92	-71	71	-46	46	-23	23	-5	5	-2	2	0	0	0	0
G186	-48	48	-69	69	-34	34	-3	3	0	0	0	0	0	0	0	0	0	0
G187	29	29	19	19	3	3	2	2	1	1	0	0	0	0	0	0	0	0
G188	-4	4	-5	5	1	1	-15	15	-4	4	2	2	-1	1	0	0	0	0
G189	-27	27	-41	41	-35	35	-20	20	-3	3	-3	3	0	0	0	0	0	0
G190	-16	16	-36	36	-30	30	-25	25	-11	11	-3	3	0	0	0	0	0	0
G191	-48	48	-53	53	-54	54	-18	18	-1	1	-1	1	0	0	0	0	0	0
G192	36	36	47	47	39	39	22	22	2	2	1	1	0	0	0	0	0	0
G193	-8	8	-18	18	-48	48	-39	39	-23	23	-3	3	0	0	0	0	0	0
G194	-31	31	-36	36	-26	26	-8	8	-3	3	-3	3	-1	1	0	0	0	0
G195	1	1	9	9	13	13	3	3	9	9	0	0	0	0	0	0	0	0
G196	6	6	19	19	18	18	15	15	2	2	1	1	0	0	0	0	0	0
G197	-1	1	21	21	21	21	-7	7	-3	3	-2	2	0	0	0	0	0	0
G198	-57	57	-25	25	-3	3	0	0	0	0	0	0	0	0	0	0	0	0
G199	-28	28	-40	40	-46	46	-27	27	-9	9	-1	1	0	0	0	0	0	0
G200	-2	2	9	9	6	6	-5	5	0	0	-7	7	0	0	0	0	0	0
G201	29	29	31	31	26	26	21	21	25	25	17	17	1	1	0	0	0	0
G202	25	25	39	39	40	40	43	43	30	30	10	10	0	0	0	0	0	0
G203	-14	14	-2	2	-4	4	-10	10	-6	6	-6	6	-5	5	-5	5	-1	1
G204	14	14	42	42	41	41	18	18	5	5	2	2	0	0	0	0	0	0
G205	46	46	41	41	17	17	-6	6	-9	9	-12	12	-4	4	0	0	0	0
G206	3	3	-14	14	-11	11	-7	7	-6	6	1	1	0	0	0	0	0	0
G207	-9	9	-10	10	-9	9	-9	9	-5	5	3	3	1	1	0	0	0	0
G208	-31	31	-44	44	-47	47	-40	40	-20	20	-4	4	0	0	0	0	0	0
G209	18	18	12	12	22	22	11	11	8	8	-1	1	0	0	0	0	0	0
G210	0	0	10	10	-3	3	-7	7	-9	9	-7	7	-2	2	0	0	0	0
G211	-16	16	-23	23	-5	5	10	10	4	4	2	2	3	3	0	0	0	0
G212	-37	37	-41	41	-22	22	-21	21	-8	8	0	0	-1	1	0	0	0	0
G213	2	2	11	11	20	20	-3	3	6	6	5	5	0	0	0	0	0	0
G214	-15	15	-18	18	-14	14	-15	15	-11	11	-11	11	-7	7	-1	1	0	0
G215	1	1	-18	18	-24	24	-20	20	-14	14	-3	3	0	0	0	0	0	0
G216	9	9	23	23	31	31	38	38	28	28	6	6	1	1	0	0	0	0
G217	-59	59	-52	52	-22	22	-3	3	0	0	0	0	0	0	0	0	0	0
G218	-63	63	-41	41	-19	19	-4	4	0	0	0	0	0	0	0	0	0	0
G219	10	10	12	12	12	12	0	0	1	1	0	0	0	0	0	0	0	0
G220	24	24	41	41	49	49	22	22	8	8	2	2	0	0	0	0	0	0
G221	28	28	24	24	3	3	-9	9	-12	12	-13	13	-5	5	0	0	0	0
G222	-39	39	-47	47	-17	17	-4	4	1	1	-1	1	0	0	0	0	0	0
G223	-21	21	-33	33	-23	23	-12	12	-6	6	-2	2	0	0	0	0	0	0
G224	-1	1	-4	4	-6	6	-1	1	0	0	0	0	0	0	0	0	0	0
G225	-28	28	-51	51	-48	48	-25	25	-15	15	-1	1	-1	1	0	0	0	0
G226	-2	2	7	7	-7	7	0	0	-7	7	-9	9	2	2	0	0	0	0
G227	-6	6	-33	33	-37	37	-12	12	-3	3	0	0	1	1	0	0	0	0
G228	14	14	3	3	-6	6	-4	4	0	0	0	0	0	0	0	0	0	0
G229	-12	12	-35	35	-31	31	-22	22	-8	8	0	0	0	0	0	0	0	0
G230	16	16	13	13	15	15	4	4	-5	5	-2	2	1	1	0	0	0	0
G231	14	14	26	26	19	19	17	17	11	11	0	0	1	1	0	0	0	0
G232	17	17	22	22	9	9	8	8	4	4	1	1	0	0	0	0	0	0
G233	9	9	7	7	28	28	15	15	17	17	12	12	4	4	0	0	0	0
G234	66	66	69	69	22	22	5	5	-2	2	-1	1	0	0	0	0	0	0
G235	-26	26	-38	38	-46	46	-43	43	-29	29	-18	18	-4	4	0	0	0	0
G236	-22	22	-51	51	-48	48	-38	38	-20	20	-4	4	0	0	0	0	0	0
G237	-22	22	-26	26	-17	17	-26	26	-17	17	-5	5	0	0	0	0	0	0
G238	65	65	70	70	37	37	10	10	-10	10	-5	5	0	0	0	0	0	0
G239	-8	8	-4	4	-11	11	1	1	2	2	0	0	0	0	0	0	0	0
G240	8	8	1	1	10	10	13	13	7	7	0	0	0	0	0	0	0	0
G241	-14	14	-11	11	-20	20	-10	10	-1	1	0	0	0	0	0	0	0	0
G242	1	1	-5	5	-9	9	-3	3	-7	7	-3	3	0	0	0	0	0	0
G243	15	15	14	14	-6	6	-5	5	-4	4	0	0	0	0	0	0	0	0
G244	-31	31	-48	48	-13	13	-1	1	0	0	0	0	0	0	0	0	0	0

## Sheet: absolute value of degree differ
Gene	编号	0.1ABS	0.2ABS	0.3ABS	0.4ABS	0.5ABS	0.6ABS	0.7ABS	0.8ABS	0.9ABS	平均值	归一化
HYI	94	103	128	99	42	14	4	1	0	0	43.4444	1
PPP1R37	185	55	92	71	46	23	5	2	0	0	32.6667	0.744063
HOXD9	90	36	73	71	57	35	14	1	0	0	31.8889	0.725594
EXTL1	61	36	79	79	52	20	4	0	0	0	30	0.680739
MED13	149	39	73	79	52	20	5	1	0	0	29.8889	0.6781
C7orf63	24	25	47	79	62	43	10	1	0	0	29.6667	0.672823
ARHGDIG	10	21	43	60	49	36	8	0	0	0	24.1111	0.540897
JUP /// KRT17	101	20	40	53	54	36	10	2	0	0	23.8889	0.53562
LOC100996758 /// NPY4R	122	36	69	70	37	2	0	0	0	0	23.7778	0.532982
NDRG4	158	41	70	63	27	3	1	0	0	0	22.7778	0.509235
POU3F2	184	36	52	60	38	14	5	0	0	0	22.7778	0.509235
LOC284788	136	45	59	53	39	8	0	0	0	0	22.6667	0.506596
USP8	235	26	38	46	43	29	18	4	0	0	22.6667	0.506596
OGFRP1	170	34	45	49	35	22	10	3	0	0	22	0.490765
FIGF /// PIR-FIGF	67	59	79	46	13	0	0	0	0	0	21.8889	0.488127
ZBP1	238	65	70	37	10	10	5	0	0	0	21.8889	0.488127
PML	180	72	58	39	12	8	4	3	0	0	21.7778	0.485488
CSF3	42	18	38	51	58	25	4	0	0	0	21.5556	0.480211
FSD1	72	27	69	66	27	3	0	0	0	0	21.3333	0.474934
MESP1	150	22	29	39	45	37	17	3	0	0	21.3333	0.474934
RPS4XP3 /// RPS4XP3	202	25	39	40	43	30	10	0	0	0	20.7778	0.461741
C1GALT1C1	20	9	28	58	50	34	7	0	0	0	20.6667	0.459103
SERP2	208	31	44	47	40	20	4	0	0	0	20.6667	0.459103
FAM154B	63	44	78	48	14	1	0	0	0	0	20.5556	0.456464
VPS37D	236	22	51	48	38	20	4	0	0	0	20.3333	0.451187
DRP2	50	11	27	36	46	40	14	4	0	0	19.7778	0.437995
MYCN	156	10	12	38	44	44	22	7	1	0	19.7778	0.437995
CTAG1A /// CTAG1B	43	9	30	44	54	36	4	0	0	0	19.6667	0.435356
LOC101928160 /// ZNF707	126	8	11	31	58	47	21	1	0	0	19.6667	0.435356
LYZL1 /// LYZL2	141	26	29	37	43	30	11	1	0	0	19.6667	0.435356
QPCTL	191	48	53	54	18	1	1	0	0	0	19.4444	0.430079
NRG2	165	22	8	39	60	37	5	1	0	0	19.1111	0.422164
FKBP8	68	65	61	35	8	1	0	1	0	0	19	0.419525
TMCC1	225	28	51	48	25	15	1	1	0	0	18.7778	0.414248
LOC100130872 /// SPON2	117	79	56	15	5	3	5	4	0	0	18.5556	0.408971
HOXB4	89	35	58	51	19	3	0	0	0	0	18.4444	0.406332
USF1	234	66	69	22	5	2	1	0	0	0	18.3333	0.403694
MRGPRG-AS1	154	9	10	35	46	39	19	5	0	0	18.1111	0.398417
NR1H2	164	34	62	42	18	5	1	1	0	0	18.1111	0.398417
IFIT2	97	55	53	25	7	4	6	6	1	0	17.4444	0.382586
LOC102724399 /// RIMBP2	133	13	33	57	42	10	0	0	0	0	17.2222	0.377309
PRSS3P2	186	48	69	34	3	0	0	0	0	0	17.1111	0.37467
NRIP1	166	20	39	44	33	11	5	1	0	0	17	0.372032
LOC100507535	120	30	51	39	7	14	10	1	0	0	16.8889	0.369393
RP11-389C8.2	199	28	40	46	27	9	1	0	0	0	16.7778	0.366755
CCDC85A	29	16	17	28	40	33	15	1	0	0	16.6667	0.364116
LOC101927830 /// TMLHE-AS1	125	57	67	22	2	2	0	0	0	0	16.6667	0.364116
RP11-440L14.3	201	29	31	26	21	25	17	1	0	0	16.6667	0.364116
CALHM3	28	23	40	32	30	20	4	0	0	0	16.5556	0.361478
RAB8A	192	36	47	39	22	2	1	0	0	0	16.3333	0.356201
FST	73	26	39	55	22	4	0	0	0	0	16.2222	0.353562
SPATA2	220	24	41	49	22	8	2	0	0	0	16.2222	0.353562
LOC101929464	129	23	27	39	34	20	1	0	0	0	16	0.348285
BSG	16	54	52	27	5	2	1	0	0	0	15.6667	0.340369
LOC100996425	121	2	23	29	34	29	18	4	1	0	15.5556	0.337731
RHPN1	193	8	18	48	39	23	3	0	0	0	15.4444	0.335092
SLC4A9	216	9	23	31	38	28	6	1	0	0	15.1111	0.327177
SLC8A1-AS1	217	59	52	22	3	0	0	0	0	0	15.1111	0.327177
OTOP2	172	8	18	25	26	28	24	5	1	0	15	0.324538
RTP4	205	46	41	17	6	9	12	4	0	0	15	0.324538
ARHGAP42	9	51	45	28	4	3	0	0	0	0	14.5556	0.313984
LOC100505711	118	8	11	34	41	25	11	1	0	0	14.5556	0.313984
NKX6-1	161	20	37	28	29	14	3	0	0	0	14.5556	0.313984
CXCL8	45	36	44	28	14	7	1	0	0	0	14.4444	0.311346
SHISA5	212	37	41	22	21	8	0	1	0	0	14.4444	0.311346
PTGS2	189	27	41	35	20	3	3	0	0	0	14.3333	0.308707
LINC01016	114	13	17	13	28	27	19	9	1	0	14.1111	0.30343
SNHG17	218	63	41	19	4	0	0	0	0	0	14.1111	0.30343
PCDHAC1	176	18	38	25	23	15	6	0	0	0	13.8889	0.298153
GAS8	74	1	33	35	41	11	3	0	0	0	13.7778	0.295515
GCNT1P1 /// GCNT1P1	78	25	12	21	24	25	15	0	0	0	13.5556	0.290237
KIF25	105	14	28	30	13	15	15	7	0	0	13.5556	0.290237
RTEL1-TNFRSF6B /// TNFRSF6B	204	14	42	41	18	5	2	0	0	0	13.5556	0.290237
LOC648987	137	20	29	35	30	7	0	0	0	0	13.4444	0.287599
PTPN3	190	16	36	30	25	11	3	0	0	0	13.4444	0.287599
GJC2	80	12	8	12	31	34	16	1	0	0	12.6667	0.269129
HTRA3	92	15	23	22	16	25	10	2	0	0	12.5556	0.266491
WFDC9	237	22	26	17	26	17	5	0	0	0	12.5556	0.266491
LGALS3BP	108	38	42	23	0	7	2	0	0	0	12.4444	0.263852
SPI1	222	39	47	17	4	1	1	0	0	0	12.1111	0.255937
RMI1	194	31	36	26	8	3	3	1	0	0	12	0.253298
TRIM6	229	12	35	31	22	8	0	0	0	0	12	0.253298
IFIT5	98	35	20	7	16	13	8	6	2	0	11.8889	0.25066
GPD1	82	6	14	31	28	15	9	0	0	0	11.4444	0.240106
LOC221122	134	8	6	18	29	28	13	1	0	0	11.4444	0.240106
LOC101929372	128	10	27	17	24	20	4	0	0	0	11.3333	0.237467
NCR2	157	9	9	12	6	22	26	14	2	0	11.1111	0.23219
MOGAT1	153	8	23	32	20	14	1	0	0	0	10.8889	0.226913
ARHGEF25	11	8	6	23	32	23	5	0	0	0	10.7778	0.224274
B3GNT7	14	18	32	27	15	5	0	0	0	0	10.7778	0.224274
TBC1D27	223	21	33	23	12	6	2	0	0	0	10.7778	0.224274
CTAG2	44	12	12	40	25	6	1	0	0	0	10.6667	0.221636
ETV7	59	29	27	7	11	12	7	3	0	0	10.6667	0.221636
MAMDC4	145	8	23	40	21	3	0	0	0	0	10.5556	0.218997
HBG1 /// HBG2	84	54	29	10	1	0	0	0	0	0	10.4444	0.216359
OASL	169	18	27	12	8	9	10	6	4	0	10.4444	0.216359
SPATS2L	221	28	24	3	9	12	13	5	0	0	10.4444	0.216359
FOXP3	71	8	3	11	21	35	11	3	1	0	10.3333	0.21372
OAS3	168	11	36	10	8	8	9	6	5	0	10.3333	0.21372
ZNF788 /// ZNF788	244	31	48	13	1	0	0	0	0	0	10.3333	0.21372
CD244	34	35	29	15	8	4	1	0	0	0	10.2222	0.211082
LOC90246	139	38	34	7	11	2	0	0	0	0	10.2222	0.211082
SIGLEC1	214	15	18	14	15	11	11	7	1	0	10.2222	0.211082
TNK1	227	6	33	37	12	3	0	1	0	0	10.2222	0.211082
UCN2	233	9	7	28	15	17	12	4	0	0	10.2222	0.211082
POLR2E	182	35	36	11	5	3	1	0	0	0	10.1111	0.208443
LOC101930415	130	51	30	8	0	0	0	0	0	0	9.88889	0.203166
TTBK1	231	14	26	19	17	11	0	1	0	0	9.77778	0.200528
CFC1B	35	17	24	8	10	17	9	0	0	0	9.44444	0.192612
RP11-373D23.2	198	57	25	3	0	0	0	0	0	0	9.44444	0.192612
LOC101927098	123	23	31	20	8	2	0	0	0	0	9.33333	0.189974
LOC79999	138	1	30	33	7	8	5	0	0	0	9.33333	0.189974
CCL3 /// CCL3L1 /// CCL3L3	31	40	30	7	2	2	0	0	0	0	9	0.182058
EEF1A1P42	52	30	32	17	2	0	0	0	0	0	9	0.182058
LOC283075	135	23	31	17	10	0	0	0	0	0	9	0.182058
PAPPA	175	7	15	15	10	18	14	2	0	0	9	0.182058
EPSTI1	56	21	9	16	11	10	9	4	0	0	8.88889	0.17942
SLC34A1	215	1	18	24	20	14	3	0	0	0	8.88889	0.17942
MAP4K4	146	6	11	21	22	15	4	0	0	0	8.77778	0.176781
IFITM3	99	6	9	11	14	19	15	4	0	0	8.66667	0.174142
CACNG8	26	1	6	22	31	15	2	0	0	0	8.55556	0.171504
C9orf3	25	20	30	22	3	1	0	0	0	0	8.44444	0.168865
CNPY4	39	19	28	17	5	5	2	0	0	0	8.44444	0.168865
ERGIC1	57	33	21	7	8	7	0	0	0	0	8.44444	0.168865
FAM177A1 /// LOC101927178	65	12	27	25	5	5	2	0	0	0	8.44444	0.168865
NINJ2	160	30	22	8	14	2	0	0	0	0	8.44444	0.168865
BZRAP1	17	22	30	10	6	5	1	1	0	0	8.33333	0.166227
HIST1H2BG /// HIST1H2BJ	87	20	24	17	10	2	0	0	0	0	8.11111	0.16095
GOLGA8I /// GOLGA8M	81	6	17	13	11	4	14	7	0	0	8	0.158311
SERPINA5	209	18	12	22	11	8	1	0	0	0	8	0.158311
LOC101930421	131	8	10	7	23	18	5	0	0	0	7.88889	0.155673
CMPK2	38	10	0	13	13	10	6	10	6	1	7.66667	0.150396
EIF3K	54	27	30	8	3	1	0	0	0	0	7.66667	0.150396
FBF1	66	24	18	15	10	0	2	0	0	0	7.66667	0.150396
HNRNPCL1 /// HNRNPCL2 /// LOC101060301 /// LOC649330	88	18	33	17	1	0	0	0	0	0	7.66667	0.150396
KIF1B	104	10	37	16	2	2	2	0	0	0	7.66667	0.150396
COX2	41	16	32	12	2	4	1	1	0	0	7.55556	0.147757
C3orf62 /// MIR4271	22	7	13	23	21	1	0	1	0	0	7.33333	0.14248
IFI6	95	5	12	5	8	10	15	6	5	0	7.33333	0.14248
ACPT	1	10	11	1	12	11	14	4	1	0	7.11111	0.137203
CHRND	37	24	19	6	12	3	0	0	0	0	7.11111	0.137203
PAK6	174	12	16	20	16	0	0	0	0	0	7.11111	0.137203
CNTN2	40	9	22	14	8	10	0	0	0	0	7	0.134565
SH2D1B	211	16	23	5	10	4	2	3	0	0	7	0.134565
MIR7111 /// RPL10A	151	11	24	20	2	5	0	0	0	0	6.88889	0.131926
MX1	155	11	13	8	9	6	4	5	6	0	6.88889	0.131926
AL928742.12	4	15	10	17	7	4	4	3	1	0	6.77778	0.129288
LXN	140	2	17	20	18	3	1	0	0	0	6.77778	0.129288
RP11-1114A5.4	196	6	19	18	15	2	1	0	0	0	6.77778	0.129288
TYSND1	232	17	22	9	8	4	1	0	0	0	6.77778	0.129288
AK123826 /// RP11-510M2.2	3	18	24	12	6	0	0	0	0	0	6.66667	0.126649
C17orf85	19	16	13	7	13	8	3	0	0	0	6.66667	0.126649
CALCA	27	12	0	17	17	9	4	1	0	0	6.66667	0.126649
ATRIP /// TREX1	13	5	7	7	15	18	6	1	0	0	6.55556	0.124011
IFIT1	96	18	8	5	6	5	5	4	7	1	6.55556	0.124011
ESPNL	58	5	14	10	0	12	12	5	0	0	6.44444	0.121372
POMT2	183	24	19	12	2	1	0	0	0	0	6.44444	0.121372
FOSB	69	32	23	2	0	0	0	0	0	0	6.33333	0.118734
HYAL4	93	7	12	26	10	2	0	0	0	0	6.33333	0.118734
LZTS2	142	17	14	10	7	7	1	1	0	0	6.33333	0.118734
NSD1	167	30	19	7	1	0	0	0	0	0	6.33333	0.118734
HERC5	85	7	16	1	8	8	5	3	7	1	6.22222	0.116095
MAPK11	147	0	6	8	6	21	15	0	0	0	6.22222	0.116095
TRPV6	230	16	13	15	4	5	2	1	0	0	6.22222	0.116095
ZFHX3	241	14	11	20	10	1	0	0	0	0	6.22222	0.116095
DHRS3	47	20	19	12	3	1	0	0	0	0	6.11111	0.113456
PCDP1	177	9	7	15	12	11	1	0	0	0	6.11111	0.113456
RP11-231C18.1	197	1	21	21	7	3	2	0	0	0	6.11111	0.113456
ARHGAP22-IT1	8	7	5	18	16	7	1	0	0	0	6	0.110818
PSENEN	187	29	19	3	2	1	0	0	0	0	6	0.110818
MAGI1	144	8	20	6	8	1	9	1	0	0	5.88889	0.108179
RSAD2	203	14	2	4	10	6	6	5	5	1	5.88889	0.108179
C6orf223	23	10	8	0	13	13	7	1	0	0	5.77778	0.105541
LINC00951	112	9	22	6	11	4	0	0	0	0	5.77778	0.105541
FAM134C	62	21	18	5	5	2	0	0	0	0	5.66667	0.102902
EGR2	53	24	17	8	1	0	0	0	0	0	5.55556	0.100264
FOXO6	70	8	17	11	6	7	1	0	0	0	5.55556	0.100264
DUSP15	51	11	12	6	13	6	1	0	0	0	5.44444	0.0976253
MAFF	143	8	16	20	4	1	0	0	0	0	5.44444	0.0976253
LINC00967	113	13	12	6	4	8	4	1	0	0	5.33333	0.0949868
LMX1B	116	17	7	1	9	12	2	0	0	0	5.33333	0.0949868
HRCT1	91	14	11	12	8	1	1	0	0	0	5.22222	0.0923483
SHISA7	213	2	11	20	3	6	5	0	0	0	5.22222	0.0923483
SEMA6B	207	9	10	9	9	5	3	1	0	0	5.11111	0.0897098
C17orf51	18	3	10	18	2	2	9	0	0	0	4.88889	0.0844327
PHYHIP	179	8	7	11	8	10	0	0	0	0	4.88889	0.0844327
ZNF516	243	15	14	6	5	4	0	0	0	0	4.88889	0.0844327
APOC2 /// APOC4 /// APOC4-APOC2	7	1	5	4	9	8	16	0	0	0	4.77778	0.0817942
DDX58	46	10	4	1	6	5	8	8	1	0	4.77778	0.0817942
LINC00028	110	14	7	8	7	5	2	0	0	0	4.77778	0.0817942
LOC102723918	132	30	10	2	1	0	0	0	0	0	4.77778	0.0817942
SEMA4C	206	3	14	11	7	6	1	0	0	0	4.66667	0.0791557
AMER3	5	11	7	5	4	10	2	0	0	0	4.33333	0.0712401
DIRAS1	48	8	9	7	6	1	6	2	0	0	4.33333	0.0712401
GFOD1	79	22	2	0	7	6	2	0	0	0	4.33333	0.0712401
ZCCHC5	240	8	1	10	13	7	0	0	0	0	4.33333	0.0712401
HES6	86	9	16	6	6	1	0	0	0	0	4.22222	0.0686016
LDB2	107	21	4	5	6	2	0	0	0	0	4.22222	0.0686016
PHOSPHO1	178	9	1	19	3	3	3	0	0	0	4.22222	0.0686016
SERPING1	210	0	10	3	7	9	7	2	0	0	4.22222	0.0686016
AF289551	2	20	15	1	1	0	0	0	0	0	4.11111	0.0659631
CD160	33	3	8	8	10	4	2	2	0	0	4.11111	0.0659631
LIMD1-AS1	109	6	1	5	18	7	0	0	0	0	4.11111	0.0659631
GAST	75	2	5	2	15	11	1	0	0	0	4	0.0633245
LOC101928955	127	7	10	11	3	4	1	0	0	0	4	0.0633245
CHDH	36	2	0	5	5	12	6	4	1	0	3.88889	0.060686
GBP1	77	10	9	7	7	1	1	0	0	0	3.88889	0.060686
IQCD	100	2	7	15	10	0	1	0	0	0	3.88889	0.060686
KIAA1751	103	6	9	4	6	9	1	0	0	0	3.88889	0.060686
RP11-108P20.1	195	1	9	13	3	9	0	0	0	0	3.88889	0.060686
SNORD3A /// SNORD3B-1 /// SNORD3B-2 /// SNORD3C /// SNORD3D	219	10	12	12	0	1	0	0	0	0	3.88889	0.060686
GATA2	76	18	8	6	2	0	0	0	0	0	3.77778	0.0580475
LOC100507501	119	2	1	24	6	1	0	0	0	0	3.77778	0.0580475
TMPRSS6	226	2	7	7	0	7	9	2	0	0	3.77778	0.0580475
BATF2	15	2	1	4	8	8	6	4	0	0	3.66667	0.055409
ARL16	12	18	10	3	1	0	0	0	0	0	3.55556	0.0527704
FAM160B2	64	8	10	4	3	5	1	1	0	0	3.55556	0.0527704
LOC101927814	124	0	8	16	3	5	0	0	0	0	3.55556	0.0527704
PTGER1	188	4	5	1	15	4	2	1	0	0	3.55556	0.0527704
KIAA0319	102	18	3	1	6	3	0	0	0	0	3.44444	0.0501319
DOCK9-AS2	49	27	1	1	1	0	0	0	0	0	3.33333	0.0474934
MMP8	152	2	16	4	7	0	0	0	0	0	3.22222	0.0448549
RP11-432J9.6	200	2	9	6	5	0	7	0	0	0	3.22222	0.0448549
ZMPSTE24	242	1	5	9	3	7	3	0	0	0	3.11111	0.0422164
ENGASE	55	9	7	4	6	0	1	0	0	0	3	0.0395778
TREML4	228	14	3	6	4	0	0	0	0	0	3	0.0395778
C1orf95	21	1	7	3	9	1	4	1	0	0	2.88889	0.0369393
ZBTB20-AS1	239	8	4	11	1	2	0	0	0	0	2.88889	0.0369393
CCHCR1	30	3	9	3	4	5	1	0	0	0	2.77778	0.0343008
CCL4	32	1	5	0	8	6	3	2	0	0	2.77778	0.0343008
EVPLL	60	5	2	1	2	10	4	0	0	0	2.66667	0.0316623
MATN1	148	1	2	6	4	3	7	1	0	0	2.66667	0.0316623
PAFAH1B1	173	6	1	9	5	0	1	0	0	0	2.44444	0.0263852
NOV	162	4	3	7	3	2	2	0	0	0	2.33333	0.0237467
PNMAL2	181	1	1	2	4	10	3	0	0	0	2.33333	0.0237467
ANKMY1	6	5	5	4	4	1	0	0	0	0	2.11111	0.0184697
LINC00189	111	4	3	4	4	3	0	0	0	0	2	0.0158311
NPR1	163	1	5	0	1	1	7	3	0	0	2	0.0158311
NHS	159	4	3	1	5	2	2	0	0	0	1.88889	0.0131926
LLGL2	115	2	7	3	0	3	0	0	0	0	1.66667	0.00791557
OR5L2	171	2	2	3	4	2	1	1	0	0	1.66667	0.00791557
H1FOO	83	1	2	1	2	4	3	0	0	0	1.44444	0.00263852
LAP3	106	0	4	1	4	3	1	0	0	0	1.44444	0.00263852
THEG5	224	1	4	6	1	0	0	0	0	0	1.33333	0

## Sheet: ExpressionOfStructuralKeyGenes
Genes	Average expression in E	Average expression in C	The difference between C and E(E-C)
HYI	0.00459783	0.00436047	0.000237352
PPP1R37	0.00136292	0.00128295	7.99655e-05
HOXD9	0.00202773	0.00188697	0.000140768
EXTL1	0.00109306	0.00100144	9.16173e-05
MED13	0.0119685	0.0128991	-0.000930545
C7orf63	0.000821715	0.000769516	5.2199e-05
ARHGDIG	0.00155571	0.00139126	0.00016445
JUP /// KRT17	0.00168759	0.00154265	0.000144944
LOC100996758 /// NPY4R	0.000807352	0.000745166	6.21863e-05
NDRG4	0.000839687	0.000754458	8.5229e-05
POU3F2	0.000631832	0.000577599	5.42334e-05
LOC284788	0.000875067	0.000799108	7.59585e-05
USP8	0.00734418	0.00802502	-0.00068084
OGFRP1	0.00392257	0.00362852	0.000294053
FIGF /// PIR-FIGF	0.000507936	0.000464776	4.31597e-05
ZBP1	0.00486985	0.00546366	-0.00059381
PML	0.00390987	0.00415309	-0.000243221
CSF3	0.00277586	0.0025523	0.000223564
FSD1	0.00296048	0.00266583	0.000294649
MESP1	0.00231338	0.0021859	0.000127481
