# Supplementary material for: Network Structure Analysis Identifying Key Genes of Autism and Its Mechanism
Source: Comput Math Methods Med. 2020 Mar 23;2020:3753080. doi: 10.1155/2020/3753080 (PMC7125446; doi:10.1155/2020/3753080)
Supplement: Supplementary Materials — Data1: sheet1 is about 244 genes related to ASD; sheet2 is about the expression profile of 244 genes related to ASD in the control group (C); sheet3 is about the expression profile of 244 genes related to ASD in the experimental group (E). Data2: sheet1 and sheet2 are the Spearman correlation coefficients of C and E, respectively. Data3: the Spearman correlation networks of C at different threshold (0.1–1) (sheet1–sheet10). Data4: the Spearman correlation networks of E at different threshold (0.1–1) (sheet1–sheet10). Data5: comparison of node degree of C and E 's correlation networks under different thresholds (sheet1–sheet4). Data6: analysis of structural key genes (sheet1–sheet5). [file 3753080.f1.zip › 3753080.f1/ProcessedData/Data6-Analysis of Structural Key Genes.xlsx]

## Sheet: C ExpressionOfStructuralKeyGene
HYI	0.00416042	0.0039031	0.00377221	0.00415879	0.0041032	0.0037284	0.00390745	0.00564004	0.00363106	0.00453484	0.00390519	0.00426754	0.00501469	0.00526593	0.00508688	0.00458616	0.00427521	0.00479268	0.0035978	0.00433286	0.00380533	0.00428975	0.00431759	0.00463102	0.00517849	0.00421561	0.00445257	0.00432354	0.00369155	0.00390706	0.00330972	0.00486796	0.00441676	0.005398	0.00381509	0.00376028	0.0040456	0.00453836	0.00534674	0.00407942	0.00476617	0.00414057	0.00769141	0.00474157	0.00438266	0.0040641	0.00419455	0.00387329	0.00491439
PPP1R37	0.00119644	0.000987679	0.00124009	0.00135996	0.00123285	0.00112886	0.0011317	0.00156152	0.000976401	0.00192803	0.00121232	0.00138865	0.00136549	0.00132481	0.00173316	0.00140931	0.0013039	0.00140616	0.00118935	0.00113913	0.00130987	0.00121269	0.001176	0.00135891	0.00147621	0.00123786	0.00114579	0.00125035	0.001426	0.00108783	0.00114431	0.0015374	0.00129043	0.00153329	0.000978453	0.00120114	0.00117534	0.00152292	0.00154299	0.00127016	0.00132321	0.0010902	0.00173425	0.0014791	0.00126977	0.00112336	0.00130555	0.00122509	0.00154134
HOXD9	0.00140032	0.00177261	0.00172481	0.0023606	0.00206446	0.00192477	0.00183952	0.00159787	0.00202975	0.00210303	0.00177816	0.00187919	0.00167166	0.00191042	0.00177884	0.00176176	0.00179154	0.00154354	0.00162556	0.001725	0.00198107	0.00178161	0.00199545	0.00181351	0.00207407	0.0017204	0.00173657	0.00191364	0.0017719	0.00150285	0.00152049	0.00220147	0.00179334	0.00238205	0.00166425	0.00169774	0.00174089	0.00205895	0.0023412	0.00216038	0.00273866	0.00222525	0.00203111	0.00209671	0.00225748	0.001637	0.00207817	0.00158644	0.002082
EXTL1	0.00101602	0.000976394	0.000824741	0.0013602	0.00114848	0.00110071	0.000919446	0.000935278	0.00103156	0.00119083	0.000901325	0.000934686	0.000823933	0.00128561	0.00130589	0.000973732	0.00084968	0.000904455	0.000770658	0.000965446	0.000974295	0.00101724	0.00146018	0.000778081	0.00113883	0.000883983	0.000782341	0.000968021	0.000898683	0.000817425	0.00084611	0.0012782	0.000915567	0.00115287	0.000897948	0.000951671	0.00095508	0.00118618	0.00136355	0.000956773	0.00109743	0.00111875	0.000983748	0.00108741	0.00117062	0.00091544	0.00128462	0.000912393	0.00130057
MED13	0.0120799	0.0136276	0.0119105	0.0110272	0.0126675	0.0146724	0.0150214	0.0109859	0.013312	0.0111936	0.0142593	0.0144158	0.0123525	0.0132483	0.0104319	0.0132357	0.0133944	0.0125055	0.0128512	0.0161623	0.0121082	0.0122866	0.0103323	0.0125251	0.0115158	0.0153759	0.0153233	0.012004	0.0129037	0.0136066	0.0119578	0.0112273	0.0130694	0.00901258	0.0164323	0.0135705	0.0143384	0.0121035	0.0101564	0.0132742	0.0122152	0.0139316	0.0087434	0.0119537	0.0136315	0.0131339	0.0138556	0.0159568	0.00907404
C7orf63	0.000785623	0.000749885	0.000721312	0.000832497	0.000883394	0.000786279	0.000664141	0.000829581	0.00069343	0.000735	0.000765412	0.000922081	0.00070412	0.000962452	0.000729569	0.000755913	0.000723676	0.000719672	0.000697621	0.000650127	0.000710882	0.00088856	0.000735084	0.000828778	0.00092165	0.000705239	0.000703515	0.00075921	0.000715311	0.000596996	0.000699445	0.000858687	0.00079678	0.000811469	0.00071924	0.000713025	0.000705807	0.000976522	0.000950478	0.000728668	0.000876361	0.000924035	0.000729041	0.00070207	0.00080112	0.000767711	0.000834545	0.000710746	0.000884356
ARHGDIG	0.00125062	0.00119847	0.00138053	0.00161595	0.00151413	0.00116524	0.00165215	0.00147834	0.000871439	0.00140199	0.00131239	0.0014303	0.0012738	0.00148455	0.00161292	0.00116525	0.00110221	0.00119082	0.000886067	0.00126341	0.00138031	0.0012862	0.00136122	0.00182293	0.00144893	0.00114291	0.00110859	0.00132167	0.00135827	0.00126059	0.00135038	0.00171261	0.00138945	0.00172771	0.001001	0.00140617	0.00116447	0.00198091	0.00226441	0.00137065	0.00195641	0.00160232	0.00181971	0.00129684	0.00164	0.00129381	0.00141697	0.00125356	0.00161962
JUP /KRT17	0.00147485	0.00138442	0.00159668	0.00162974	0.0020973	0.00137684	0.00120604	0.00170859	0.00121837	0.00170217	0.00140761	0.0013962	0.00143832	0.00155465	0.00206744	0.00175008	0.00146634	0.00172824	0.00142995	0.00124158	0.00193286	0.00150563	0.00141212	0.00131726	0.00191686	0.00141667	0.00127499	0.00152556	0.00158726	0.00131498	0.00155094	0.0020507	0.00132593	0.00185607	0.00110208	0.00150302	0.00125226	0.00174078	0.00227823	0.00162821	0.00167286	0.0016104	0.00164865	0.00151402	0.00168509	0.00151528	0.00159608	0.00153828	0.00161585
NPY4R	0.000725184	0.000771171	0.000767089	0.000724615	0.00083722	0.000591603	0.000838951	0.000756774	0.000600423	0.000752739	0.000709294	0.000511488	0.00065653	0.00071841	0.0007674	0.000760203	0.000857072	0.000643831	0.000675904	0.00075325	0.00089134	0.000776703	0.000845079	0.000713115	0.000970105	0.000786662	0.000643215	0.000832622	0.000720333	0.000655861	0.000617258	0.000748306	0.000718026	0.00074679	0.000731031	0.00074679	0.000608367	0.000857763	0.000752971	0.000755522	0.000687343	0.000898877	0.000693965	0.000715408	0.000781732	0.000953837	0.000681339	0.000728605	0.000782149
NDRG4	0.000770285	0.000616267	0.000756729	0.000859111	0.000897631	0.00069182	0.000680561	0.000795382	0.00064578	0.000694081	0.000927215	0.000791146	0.00064526	0.000699662	0.000779791	0.000715335	0.000923123	0.00075789	0.000659131	0.000657178	0.000939266	0.00086864	0.000803644	0.000881825	0.000756734	0.000728347	0.00066318	0.000710803	0.000683636	0.000948311	0.000735519	0.000706751	0.000774954	0.000897984	0.000646397	0.000862932	0.000798056	0.00109967	0.000620368	0.000788212	0.00109545	0.000789986	0.000542779	0.000754412	0.000918557	0.00067192	0.000766466	0.00067596	0.000723246
POU3F2	0.000560696	0.000545044	0.000566275	0.000735546	0.000565023	0.000484207	0.000555621	0.000573528	0.000606343	0.000505953	0.000514048	0.000563739	0.000544674	0.000604021	0.000591436	0.000561607	0.000571904	0.000617391	0.000571535	0.000578085	0.000625218	0.000583424	0.000616768	0.000664379	0.000669015	0.00056411	0.000560002	0.000617483	0.000591097	0.000515	0.000553997	0.000572763	0.000666321	0.000720608	0.000492028	0.00051322	0.000502439	0.000638237	0.000669118	0.000637148	0.000575464	0.000613575	0.000608744	0.000637609	0.000600597	0.000441421	0.000606455	0.000543792	0.000592412
LOC284788	0.000800021	0.000838114	0.000681188	0.000825128	0.000854763	0.000941105	0.000699387	0.000728955	0.000812674	0.000919238	0.000824544	0.000721575	0.000770285	0.000764423	0.000760441	0.000714627	0.000881962	0.000665684	0.000821472	0.000739643	0.000968957	0.000722699	0.000807285	0.000813996	0.00082637	0.000712081	0.000695969	0.0007493	0.000686971	0.000725562	0.000717518	0.00082685	0.000713416	0.000768241	0.000875525	0.000764423	0.000726283	0.000805656	0.000859447	0.000722883	0.00085981	0.000956397	0.000679912	0.000681019	0.000795957	0.000906695	0.000709683	0.000788861	0.000804889
USP8	0.0077985	0.00974832	0.00810567	0.00697377	0.00725962	0.00885063	0.00815672	0.00685356	0.00864579	0.0047906	0.0114403	0.00864885	0.00773741	0.00636425	0.00645172	0.0086874	0.00843372	0.00794115	0.00870691	0.00902984	0.00843044	0.0060879	0.00589711	0.00746334	0.00596013	0.0106243	0.00821873	0.00705662	0.00928176	0.00916682	0.00956113	0.00563879	0.00842657	0.00576152	0.0110771	0.00994438	0.00943904	0.0072283	0.00550758	0.00767107	0.00631536	0.0067387	0.0052359	0.00607741	0.00853562	0.00858565	0.0074318	0.0113233	0.00689756
OGFRP1	0.00370194	0.00425606	0.00352356	0.00470413	0.0041207	0.00376963	0.00357612	0.00378512	0.00360668	0.00361076	0.0034475	0.00326994	0.00296566	0.00347599	0.00367963	0.00354945	0.00314271	0.00351236	0.00405009	0.00307939	0.003631	0.00435183	0.00401645	0.0033668	0.00450819	0.00326316	0.00369141	0.00364347	0.00290469	0.00276269	0.00345952	0.00430048	0.00353972	0.00349363	0.00317436	0.00374978	0.00353811	0.00498073	0.00335313	0.00325928	0.0035073	0.00500595	0.00307654	0.00314743	0.00361511	0.00381045	0.00369777	0.00336779	0.00446823
FIGF	0.000392103	0.000526006	0.000490758	0.000462856	0.000507206	0.00048087	0.000454785	0.000462822	0.000433755	0.000431054	0.000455226	0.000438448	0.000500411	0.00049214	0.000409043	0.000347236	0.000423353	0.000504646	0.000512102	0.000507885	0.000419093	0.000578248	0.000503835	0.000391283	0.000564315	0.000463252	0.000447232	0.000568839	0.000417897	0.000479218	0.000457001	0.000497252	0.000454672	0.000610626	0.000482175	0.000424043	0.000465238	0.000518081	0.000479572	0.000573532	0.000403566	0.000418604	0.000422062	0.000461584	0.000463338	0.000446069	0.000548623	0.000380037	0.000443943
ZBP1	0.00412385	0.00322148	0.00490541	0.00565694	0.0103738	0.00494363	0.0149622	0.00685924	0.00544196	0.00578521	0.00427403	0.00483507	0.00595802	0.00365122	0.0052562	0.00374993	0.00409671	0.00400943	0.00459701	0.00800886	0.00489273	0.00444395	0.00535715	0.00394328	0.00509098	0.0045153	0.0117534	0.00441216	0.00577207	0.00462604	0.00776848	0.00333253	0.00380706	0.00402405	0.00433813	0.00568833	0.00557629	0.00370669	0.00415042	0.0173503	0.00503341	0.00397562	0.0093845	0.00447494	0.00386967	0.00454423	0.00390509	0.00410691	0.0052886
PML	0.00351354	0.00339978	0.00325354	0.0048027	0.00823587	0.00320379	0.00800358	0.00460024	0.00394386	0.00492617	0.00312338	0.00357217	0.00542216	0.00345709	0.00389948	0.00379738	0.00405632	0.00435329	0.00343417	0.00312193	0.00353817	0.00396384	0.00544883	0.00378293	0.00454737	0.00315712	0.00743271	0.00410769	0.00361506	0.00325918	0.00402093	0.00331065	0.00428033	0.00398259	0.00301086	0.00296441	0.00303703	0.0033447	0.00360594	0.00733948	0.00470773	0.00370693	0.00391729	0.00346142	0.00396596	0.00496581	0.00305458	0.00317579	0.00440192
CSF3	0.00249858	0.00250286	0.00199213	0.00384845	0.00249998	0.00272971	0.00237494	0.00255389	0.00209966	0.00320642	0.00235591	0.00193676	0.0024832	0.00320281	0.00219932	0.00218141	0.00345368	0.00245186	0.00240229	0.00219521	0.00287799	0.00249202	0.00372412	0.00324472	0.00233063	0.00258109	0.00235599	0.00258741	0.00251034	0.00223553	0.00191544	0.00288248	0.00236441	0.0024657	0.00233389	0.00232146	0.00224644	0.00321708	0.00306963	0.00285291	0.00276144	0.00297534	0.00253666	0.00223083	0.00292275	0.00242061	0.00278478	0.00246607	0.00261251
FSD1	0.00156949	0.00275515	0.00256405	0.00275711	0.0027203	0.00285649	0.00239997	0.00253638	0.00231292	0.00273763	0.00246483	0.00309235	0.00245471	0.00205679	0.00309672	0.00320496	0.00229537	0.00290083	0.00232819	0.002304	0.00268601	0.00334654	0.00204371	0.0032321	0.00220983	0.00263643	0.00212369	0.00249166	0.00287827	0.00268045	0.00256396	0.00271363	0.00304112	0.00210533	0.00190723	0.00327797	0.00251162	0.00345884	0.00307735	0.00238892	0.0033988	0.00320176	0.00324194	0.00291019	0.00237308	0.00261155	0.00283598	0.00238286	0.00326701
MESP1	0.00206968	0.00215155	0.00194827	0.00243066	0.00245052	0.0019887	0.00209198	0.00238273	0.00208572	0.00254042	0.00207168	0.00212183	0.00219043	0.00222404	0.00211003	0.00200492	0.00220462	0.00203414	0.00201194	0.00219614	0.00230878	0.00256624	0.00229012	0.00260542	0.00260277	0.00211316	0.00208482	0.00217299	0.00195926	0.00216122	0.00178919	0.00246218	0.0021432	0.00247526	0.00182294	0.00199539	0.00172918	0.00256577	0.00266879	0.00206634	0.00243791	0.00232821	0.00247542	0.00226377	0.00228006	0.00208662	0.00224389	0.00206526	0.00236338
[truncated: 15 more columns]

## Sheet: E ExpressionOfStructuralKeyGene
HYI	0.00547219	0.00497719	0.00394743	0.00504796	0.00418795	0.004105	0.00510249	0.0048432	0.0044771	0.00300431	0.00417654	0.00460257	0.0049299	0.0047345	0.00592463	0.0043308	0.00416061	0.00375207	0.00440619	0.0049694	0.00489677	0.00462437	0.00576507	0.00561384	0.00422578	0.00449945	0.00572598	0.00488366	0.00484563	0.00567269	0.00457651	0.00478158	0.004445	0.00440448	0.00444436	0.00379592	0.00557642	0.00484636	0.00453743	0.00457137	0.00479354	0.0047454	0.0044696	0.0050606	0.00433007	0.00447644	0.00430871	0.00425745	0.00404584
PPP1R37	0.00145849	0.00109362	0.0012318	0.00140098	0.00136449	0.00143639	0.00134619	0.00113249	0.0012908	0.000992092	0.0010365	0.00144514	0.00137736	0.00127022	0.00152669	0.00120644	0.0013442	0.00131909	0.00137363	0.00139585	0.0015104	0.00124094	0.00168768	0.00172641	0.00101494	0.00140886	0.00154933	0.00146631	0.00194958	0.0014797	0.00122518	0.00132795	0.00151206	0.00136261	0.00130964	0.0010543	0.0013895	0.00127317	0.0013742	0.00137343	0.00122423	0.00124335	0.00126583	0.00158343	0.00167349	0.00127204	0.0014548	0.00109877	0.00119668
HOXD9	0.00189067	0.00188827	0.0018674	0.00195761	0.00185103	0.00225527	0.00208785	0.00163132	0.00195951	0.00186105	0.00186876	0.00176908	0.00186402	0.0022223	0.00252646	0.00175213	0.00200202	0.00212061	0.001936	0.00188979	0.00248195	0.00191232	0.0020613	0.00241398	0.00176796	0.00256219	0.00256693	0.00251702	0.00282266	0.00176194	0.00190379	0.00180108	0.00188127	0.00211995	0.00181747	0.00185301	0.00199621	0.00223903	0.00207967	0.00183738	0.00161499	0.00218966	0.00189267	0.00199138	0.00184404	0.0019242	0.00184755	0.00213558	0.00199932
EXTL1	0.00113461	0.0011526	0.000945024	0.00131972	0.00100944	0.00123463	0.000947659	0.00100424	0.000909028	0.00140683	0.00112489	0.000952713	0.00149056	0.00102082	0.000979509	0.000812312	0.000976942	0.00114878	0.0010091	0.000929878	0.00131074	0.00119298	0.00119724	0.00143298	0.000978009	0.0011421	0.000974241	0.00122492	0.00142133	0.0012069	0.000970097	0.00145947	0.000960483	0.00111143	0.00135798	0.00092191	0.00101483	0.00109874	0.000915743	0.000810944	0.00104947	0.0013128	0.000964943	0.00130154	0.00110577	0.00107128	0.00084039	0.00116009	0.00103537
MED13	0.0144227	0.0111692	0.0134197	0.0125223	0.0143247	0.01135	0.0133576	0.0145285	0.0149272	0.0142691	0.0105667	0.00896588	0.0116204	0.0121107	0.0118879	0.012016	0.0131911	0.0119652	0.0133258	0.0106303	0.012238	0.0126792	0.00918938	0.0125095	0.0145653	0.0128108	0.0120428	0.011634	0.0076143	0.0102387	0.0126977	0.0108561	0.0120876	0.0119546	0.0115916	0.0115722	0.0124396	0.0102382	0.0105256	0.0116326	0.013545	0.0144	0.0121587	0.0110763	0.011003	0.0108808	0.0117669	0.0121627	0.0130764
C7orf63	0.000761583	0.000770367	0.000803873	0.000846433	0.000888396	0.000815132	0.000800421	0.000747924	0.000769521	0.000830604	0.000722912	0.000753042	0.000895938	0.000773397	0.000780758	0.00084217	0.000686603	0.000709025	0.000764033	0.00070643	0.000998192	0.00113794	0.000735877	0.00104608	0.000703103	0.000869094	0.000924337	0.000802247	0.000844837	0.000720477	0.00084281	0.000885782	0.000701196	0.000723181	0.00105946	0.000787721	0.00077981	0.000906196	0.000815072	0.000798383	0.000820953	0.0008401	0.000779445	0.000757499	0.000934576	0.00087311	0.0006991	0.000769794	0.000780998
ARHGDIG	0.00117133	0.00122301	0.0012296	0.00106911	0.00135429	0.00160323	0.0015046	0.00109006	0.00152933	0.00205347	0.00162629	0.00137791	0.00159537	0.00172099	0.00202427	0.00113407	0.00162436	0.00127571	0.00138962	0.00122337	0.00173629	0.00186343	0.0013107	0.00177913	0.000971507	0.00156679	0.00124183	0.00161029	0.00144216	0.00139866	0.00160554	0.00196814	0.00144172	0.00142615	0.001992	0.00153519	0.00152538	0.00151592	0.0017089	0.00156616	0.00143628	0.00133503	0.00132959	0.00142221	0.00169744	0.00155626	0.00136701	0.00156209	0.00130115
JUP /KRT17	0.00145209	0.00135381	0.00158816	0.00170378	0.00176828	0.00148947	0.00144117	0.00152328	0.00162466	0.00172962	0.00163259	0.00174718	0.00197368	0.00180428	0.00131914	0.00129507	0.00160851	0.00154582	0.00169337	0.00184198	0.00203331	0.0021112	0.0014123	0.00175743	0.0015944	0.00145266	0.00139946	0.00191032	0.00229125	0.00164618	0.00148252	0.00161145	0.00151285	0.00137275	0.00217226	0.00161776	0.00136203	0.00204702	0.00189662	0.00211685	0.00146681	0.00153815	0.00153694	0.00135515	0.00176997	0.00164146	0.00146107	0.00149833	0.00163891
NPY4R	0.000931939	0.000624177	0.000813137	0.000760759	0.000868677	0.000758604	0.000849021	0.000579346	0.000750549	0.000893183	0.000681408	0.000916691	0.000901123	0.000910487	0.000692889	0.000766735	0.000684117	0.000667254	0.000734015	0.000905407	0.000629183	0.000947114	0.00073421	0.000701012	0.000676031	0.000866371	0.000756768	0.000962004	0.000807967	0.000765621	0.000894953	0.000668377	0.000668952	0.000833405	0.000823917	0.000764896	0.000874955	0.000914215	0.000751786	0.000554651	0.000745322	0.000941006	0.000667763	0.000801408	0.000869143	0.000858955	0.00091639	0.000820564	0.000792416
NDRG4	0.00101936	0.000725188	0.000800124	0.000740379	0.000748061	0.00101439	0.000684168	0.000770774	0.000805943	0.000704816	0.00064983	0.00100286	0.000871474	0.000995134	0.000758079	0.000806262	0.000758809	0.000775488	0.000910834	0.000956757	0.000796744	0.000861763	0.00113513	0.000945186	0.000766611	0.000615671	0.000780168	0.000735605	0.000910947	0.00073468	0.00100519	0.000570879	0.000912165	0.00110057	0.000760188	0.000731063	0.000772426	0.00101238	0.000967291	0.00065492	0.000737205	0.000844792	0.000860836	0.000791972	0.00078206	0.000783404	0.000951912	0.000742267	0.00066524
POU3F2	0.000689076	0.000618127	0.000524802	0.000792659	0.000585031	0.000764622	0.000670653	0.000463477	0.000509927	0.0005669	0.000501094	0.000644049	0.000592706	0.000652071	0.000684533	0.000602336	0.000626606	0.000773351	0.000579207	0.000603638	0.000590369	0.000620809	0.00062699	0.000775821	0.000502075	0.00066161	0.000641643	0.00079259	0.000638519	0.000661491	0.000606563	0.000558763	0.000560969	0.000536363	0.000700979	0.000547541	0.000561833	0.000633425	0.000640979	0.000497239	0.000605975	0.000688734	0.000545734	0.000620358	0.000668793	0.000586148	0.000583571	0.000603155	0.000651027
LOC284788	0.000800098	0.000776332	0.00104786	0.000567925	0.000761951	0.000944375	0.000731964	0.000829723	0.000820681	0.00103817	0.000645159	0.000845182	0.001238	0.000877995	0.000763739	0.000917018	0.000796656	0.000779683	0.000724906	0.00100525	0.000860908	0.00100772	0.000789233	0.000780563	0.000808769	0.000958792	0.000755237	0.00086057	0.000911714	0.00105527	0.000842754	0.00124701	0.000919722	0.000964251	0.0010694	0.000730856	0.000727274	0.000899866	0.00110993	0.000980832	0.00081398	0.000863519	0.000785086	0.000851304	0.000766444	0.000855766	0.000810761	0.000986171	0.000815811
USP8	0.00723749	0.00705668	0.00908261	0.00616335	0.00752504	0.00573503	0.00690223	0.0071192	0.00800229	0.00977503	0.00826981	0.0083047	0.00631773	0.0080582	0.00751343	0.00842998	0.00747858	0.00718777	0.00759115	0.00656596	0.00603985	0.00554814	0.00504136	0.00515945	0.00800725	0.00798978	0.00625761	0.00658769	0.00400162	0.00621569	0.00756383	0.0065191	0.0062667	0.00733064	0.00616501	0.0117005	0.0069144	0.00532787	0.00730351	0.00709084	0.00981457	0.00633268	0.00788122	0.00637723	0.00740667	0.00731238	0.00804373	0.00784849	0.00885067
OGFRP1	0.00321865	0.00380155	0.00380731	0.00291357	0.0042977	0.00447112	0.00268054	0.00367261	0.00390787	0.00416113	0.00419523	0.00409176	0.00505947	0.00468435	0.00282025	0.00385978	0.00396728	0.00342392	0.00315309	0.00334187	0.00282403	0.00526154	0.00370304	0.00299846	0.00446542	0.00381644	0.00277412	0.00431095	0.00463316	0.00477148	0.00367629	0.00423455	0.00360848	0.00373852	0.0051291	0.00380528	0.00314601	0.00469757	0.00484939	0.00465009	0.00327434	0.00392628	0.00382076	0.00416854	0.0041864	0.005337	0.00389281	0.00559141	0.00418183
FIGF	0.000380157	0.000561848	0.000503882	0.000500917	0.000636676	0.000457042	0.000414063	0.000415172	0.000515447	0.000495449	0.000506177	0.000455829	0.000629914	0.000509495	0.000537525	0.000435578	0.000501482	0.000429587	0.000381783	0.000373183	0.000590527	0.000575647	0.000469829	0.000464704	0.000480709	0.000433121	0.00056021	0.000499243	0.000621736	0.000603512	0.000672175	0.000431069	0.000451989	0.000417437	0.000641215	0.000610932	0.000376799	0.000614978	0.000489093	0.00052426	0.000404283	0.000498851	0.000455247	0.000424916	0.000585042	0.000562129	0.000455342	0.000500917	0.000471365
ZBP1	0.00851661	0.00342006	0.00298748	0.00544152	0.0043987	0.00371715	0.0130444	0.00419286	0.00332114	0.00533538	0.00447061	0.0037276	0.00373499	0.00547085	0.00456817	0.00426319	0.00600965	0.00561445	0.00387364	0.00588216	0.00534098	0.00310826	0.00525723	0.00423904	0.00543948	0.00403649	0.00774736	0.00561375	0.00597007	0.00310625	0.00484718	0.0103074	0.00434037	0.00460186	0.00414634	0.00279276	0.00407612	0.00311906	0.00329351	0.00359545	0.00370089	0.00492212	0.00453713	0.00536165	0.00413883	0.00534412	0.00316376	0.0040231	0.00424531
PML	0.00657874	0.0032903	0.00308257	0.00325132	0.0036618	0.00337464	0.00676153	0.00299034	0.00322965	0.00308184	0.00346709	0.00432146	0.00324174	0.00323084	0.00409473	0.00285179	0.00440959	0.00315862	0.00334536	0.00401884	0.00389676	0.00328549	0.00395806	0.00367266	0.00303067	0.00373725	0.00375936	0.00341374	0.00739324	0.00330633	0.0031307	0.0109304	0.00318644	0.00366057	0.00393602	0.0030323	0.00309114	0.00309674	0.00449413	0.00414879	0.00354806	0.00275996	0.00429461	0.00404221	0.00328981	0.00333831	0.00387938	0.00313212	0.00397047
CSF3	0.00277233	0.00268281	0.00347721	0.00270398	0.00274639	0.00286769	0.00251982	0.00277699	0.00243237	0.0029744	0.0022423	0.00216123	0.00275534	0.00277164	0.00316315	0.00223573	0.00269332	0.00259617	0.00279069	0.00216236	0.00295303	0.00281291	0.00373396	0.00369434	0.00216148	0.00302649	0.00317532	0.00335741	0.00327532	0.0030236	0.00263965	0.0033061	0.00236355	0.00197724	0.00304008	0.00239905	0.00290428	0.00340226	0.00322734	0.00289514	0.00261812	0.00293868	0.00224763	0.00244521	0.00256314	0.00208846	0.00252532	0.0023342	0.00225614
FSD1	0.00269935	0.00202811	0.00269707	0.00270782	0.00311189	0.00292305	0.0022698	0.00247476	0.00289306	0.00314929	0.00205062	0.00243031	0.00366215	0.00303917	0.00249685	0.00227571	0.00249928	0.00224435	0.00270535	0.00279523	0.00391645	0.0028382	0.00299968	0.00255308	0.00384136	0.00226479	0.00302728	0.00303182	0.00393051	0.00314751	0.00289782	0.00299008	0.00358018	0.00248125	0.00302292	0.00302783	0.00478071	0.00406396	0.00322002	0.00293749	0.00289459	0.00231058	0.00253499	0.00201145	0.00292069	0.00339718	0.00252588	0.00344014	0.00203215
MESP1	0.00258017	0.00208566	0.00221233	0.00215372	0.00231764	0.00275134	0.00227586	0.00209161	0.00222114	0.00234272	0.00180503	0.00234059	0.00249377	0.00225255	0.00190536	0.00228989	0.00239418	0.00237359	0.00212157	0.00199732	0.00242347	0.00255493	0.00230049	0.00207973	0.00195879	0.00276528	0.00237901	0.00218236	0.00266567	0.00233192	0.00226072	0.00276094	0.00195895	0.00210913	0.00248067	0.00189003	0.00236791	0.00250656	0.00258892	0.00243175	0.00224828	0.00239121	0.00228473	0.00226985	0.00232508	0.00208832	0.00203609	0.00261161	0.00247751
[truncated: 34 more columns]

## Sheet: ComparisonOfMeanofCE
	C	E	C-E
HYI	0.00436047	0.00459783	-0.000237352
PPP1R37	0.00128295	0.00136292	-7.99655e-05
HOXD9	0.00188697	0.00202773	-0.000140768
EXTL1	0.00100144	0.00109306	-9.16173e-05
MED13	0.0128991	0.0119685	0.000930545
C7orf63	0.000769516	0.000821715	-5.2199e-05
ARHGDIG	0.00139126	0.00155571	-0.00016445
JUP /KRT17	0.00154265	0.00168759	-0.000144944
NPY4R	0.000745166	0.000807352	-6.21862e-05
NDRG4	0.000754458	0.000839687	-8.5229e-05
POU3F2	0.000577599	0.000631832	-5.42334e-05
LOC284788	0.000799108	0.000875067	-7.59585e-05
USP8	0.00802502	0.00734418	0.00068084
OGFRP1	0.00362852	0.00392257	-0.000294053
FIGF	0.000464776	0.000507936	-4.31597e-05
ZBP1	0.00546366	0.00486985	0.00059381
PML	0.00415309	0.00390987	0.000243221
CSF3	0.0025523	0.00277586	-0.000223564
FSD1	0.00266583	0.00296048	-0.000294649
MESP1	0.0021859	0.00231338	-0.000127481

## Sheet: NUMBER IN FUNCTION
Cancer	EXTL1	MED13	PML	USP8	FIGF	JUP
NS	MED13	ARHGDIG	NPY4R	PPP1R37	NDRG4	POU3F2	USP8	MESP1
IS	CSF3	ZBP1	PML
ES	MED13	USP8	FIGF
CS	EXTL1	FIGF	FSD1
GS	JUP	PML	ARHGDIG
CP	FIGF	USP8
GR	PML
NS	8
Cancer	6
IS	3
ES	3
CS	3
GS	3
CP	2
GR	1
Unknown	3

## Sheet: EXPRESSION IN FUNCTON
	C	E	C-E
HYI	0.00436047	0.00459783	-0.000237352
PPP1R37	0.00128295	0.00136292	-7.99655e-05
HOXD9	0.00188697	0.00202773	-0.000140768
EXTL1	0.00100144	0.00109306	-9.16173e-05
MED13	0.0128991	0.0119685	0.000930545
C7orf63	0.000769516	0.000821715	-5.2199e-05
ARHGDIG	0.00139126	0.00155571	-0.00016445
JUP /KRT17	0.00154265	0.00168759	-0.000144944
NPY4R	0.000745166	0.000807352	-6.21862e-05
NDRG4	0.000754458	0.000839687	-8.5229e-05
POU3F2	0.000577599	0.000631832	-5.42334e-05
LOC284788	0.000799108	0.000875067	-7.59585e-05
USP8	0.00802502	0.00734418	0.00068084
OGFRP1	0.00362852	0.00392257	-0.000294053
FIGF	0.000464776	0.000507936	-4.31597e-05
ZBP1	0.00546366	0.00486985	0.00059381
PML	0.00415309	0.00390987	0.000243221
CSF3	0.0025523	0.00277586	-0.000223564
FSD1	0.00266583	0.00296048	-0.000294649
MESP1	0.0021859	0.00231338	-0.000127481
癌症	EXTL1	MED13	PML	USP8	FIGF	JUP
神经系统	MED13	ARHGDIG	NPY4R	PPP1R37	NDRG4	POU3F2	USP8	MESP1
免疫系统	CSF3	ZBP1	PML
内分泌系统	MED13	USP8	FIGF
心血管	EXTL1	FIGF	FSD1
胃肠道系统	JUP	PML	ARHGDIG
细胞过程	FIGF	USP8
遗传调控	PML
							C	E
Cancer	C	E	C-E			NS	0.0278614	0.0268236
EXTL1	0.00100144	0.00109306	-9.16173e-05			Cancer	0.028086	0.0265111
MED13	0.0128991	0.0119685	0.000930545			IS	0.0121691	0.0115556
PML	0.00415309	0.00390987	0.000243221			ES	0.0213888	0.0198206
USP8	0.00802502	0.00734418	0.00068084			CS	0.00146622	0.00456147
FIGF	0.000464776	0.000507936	-4.31597e-05			GS	0.00569574	0.00715318
JUP	0.00154265	0.00168759	-0.000144944			CP	0.0084898	0.00785212
	0.028086	0.0265111				GR	0.00415309	0.00390987
NS	C	E	C-E
MED13	0.0128991	0.0119685	0.000930545
ARHGDIG	0.00139126	0.00155571	-0.00016445
NPY4R	0.000745166	0.000807352	-6.21862e-05
PPP1R37	0.00128295	0.00136292	-7.99655e-05
NDRG4	0.000754458	0.000839687	-8.5229e-05
POU3F2	0.000577599	0.000631832	-5.42334e-05
USP8	0.00802502	0.00734418	0.00068084
MESP1	0.0021859	0.00231338	-0.000127481
	0.0278614	0.0268236	0.00103784
IS	C	E	C-E
CSF3	0.0025523	0.00277586	-0.000223564
ZBP1	0.00546366	0.00486985	0.00059381
PML	0.00415309	0.00390987	0.000243221
	0.0121691	0.0115556
ES	C	E	C-E
MED13	0.0128991	0.0119685	0.000930545
USP8	0.00802502	0.00734418	0.00068084
FIGF	0.000464776	0.000507936	-4.31597e-05
	0.0213888	0.0198206
GS			C-E
EXTL1	0.00100144	0.00109306	-9.16173e-05
FIGF	0.000464776	0.000507936	-4.31597e-05
FSD1	0.00266583	0.00296048	-0.000294649
	0.00146622	0.00456147
GS			C-E
JUP	0.00154265	0.00168759	-0.000144944
PML	0.00415309	0.00390987	0.000243221
ARHGDIG	0.00139126	0.00155571	-0.00016445
	0.00569574	0.00715318
CP
FIGF	0.000464776	0.000507936
USP8	0.00802502	0.00734418
	0.0084898	0.00785212
GR
PML	0.00415309	0.00390987
